# Supplementary material for: In vivo identification of GTPase interactors by mitochondrial relocalization and proximity biotinylation
Source: eLife journal article supplement (doi:10.7554/elife.45916), 2019-07-11
Supplement: supp [file elife_poa_e45916_Supplementary_file_5.xlsx]

## Sheet: Rab2QL comparison
	Human gene	Drosophila gene	MitoID	S2 AC	Reference
	MitoID AND S2 affinity chromatography
	Non-complexed proteins:
	CCDC186	Golgin104	Y	Y	(Gillingham et al., 2014)
	FAM114A2	CG9590	Y	Y	(Gillingham et al., 2014)
	BLZF1	CG9356	Y	Y	(Short et al., 2001)
	GCC2	GCC185	Y	y	(Hayes et al., 2009)
	TRIP11	Gmap	Y	y	(Sato et al., 2015)
	COG complex:				(Miller et al., 2013)
	COG1	CG4848	Y	Y
	COG2	ldlCp	N	Y
	COG3	Cog3	N	Y
	COG4	CG7456	Y	Y
	COG5	fws	Y	Y
	COG6	CG1968	N	Y
	COG7	Cog7	N	N
	COG8	CG6488	N	Y
	GM130/p115 complex:				(Short et al., 2001)
	GOLGA2	GM130	Y	Y
	USO1	p115	Y	Y
	ONLY MitoID
	Non-complexed proteins:
	ARFGEF3	CG5937	Y	N	This work
	INPP5B	Ocrl	Y	N	(Williams et al., 2007)
	TBC1D25	CG8155	Y	N	(Itoh et al., 2006)
	TMF1	CG4557	Y	N	(Miller et al., 2013)
	STAMBPL1	CG2224	Y	N	This work
	PICK1/ICA69 complex:				(Buffa et al., 2008)
	PICK1	PICK1	Y	N
	ICA1	ICA69	Y	N
	ONLY S2 affinity chromatography
	HOPS complex:				(Kajiho et al., 2016)
	VPS11	Vps11	N	Y
	VPS16A	Vps16A	N	Y
	VPS18	dor	N	Y
	VPS33A	car	N	Y
	VPS39	Vps39	N	Y
	VPS41	lt	N	Y
	Not known mammalian effectors but both MitoID AND S2 affinity chromatography
	TBC1D16	TBC1D16	Y	Y
	SNX29	CG5439	Y	Y
	BICD2	BicD	Y	Y
	BICD1	BicD	Y	Y
	GCC1	GCC88	Y	Y
	TBC1D9B	CG7324	Y	Y
	GOLGA4	Golgin245	Y	Y

## Sheet: Rab5QL comparison
	Human gene	Drosophila gene	MitoID	S2 AC	Reference
	MitoID AND S2 affinity chromatography
	Non-complexed proteins:
	ANKFY1	CG41099	Y	Y	(Schnatwinkel et al., 2004)
	HTT	htt	Y	Y	(Pal et al., 2006)
	INPP5B	Ocrl	Y	Y	(Shin et al., 2005)
	OSBPL9	CG1513	Y	Y	This work
	RUFY1	CG31064	Y	Y	(Fouraux et al., 2004)
	PPP1R21	CG6607	Y	Y	(Christoforidis and Zerial, 2000)
	TBC1D15	Tbc1d15-17	Y	Y	(Itoh et al., 2006)
	TBCK	CG4041	Y	Y	This work
	CORVET complex:				(Perini et al., 2014)
	VPS8	Vps8	Y	Y
	VPS11	Vps11	Y	N
	VPS16	Vps16A	Y	Y
	VPS18	dor	Y	Y
	VPS33A	car	Y	Y
	VPS34 complex II:				(Christoforidis et al., 1999b)
	PIK3C3	Pi3K59F	Y	y
	PIK3R4	Vps15	Y	y
	BECN1	Atg6	Y	y
	UVRAG	Uvrag	Y	y
	RUBCN	CG12772	Y	N
	FHF complex:				(Guo et al., 2016)
	HOOK1	hook	Y	y
	FAM160A1	CG3558	Y	y
	FAM160A2	CG3558	Y	y
	AKTIP	cbx	N	Y
	Rabenosyn/VPS45 complex:				(Nielsen et al., 2000)
	RBSN	Rbsn-5	Y	Y
	VPS45	Vps45	Y	Y
	Rabaptin/Rabex-5 complex:				(Christoforidis et al., 1999a)
	RABEP1	Rbpn-5	Y	Y
	RABEP2	Rbpn-5	Y	Y
	RABGEF1	Rabex-5	Y	Y
	OCRL/INPP5F complex:				(Nakatsu et al., 2015)
	OCRL	Ocrl	Y	Y
	INPP5F	CG7956	Y	Y
	ONLY MitoID
	Non-complexed proteins:
	APPL1		Y	N	(Miaczynska et al., 2004)
	APPL2		Y	N	(Miaczynska et al., 2004)
	EEA1		Y	N	(Christoforidis et al., 1999a)
	INPP4A	CG42271	Y	N	(Shin et al., 2005)
	RELCH		Y	N	This work
	VPS34 complex I subunit:				(Christoforidis et al., 1999b)
	NRBF2	CG42554	Y	N
	ONLY S2 affinity chromatography
	MON1/CCZ1 complex:				(Kinchen and Ravichandran, 2010)
	MON1A/B	Mon1	N	Y
	CCZ1	Ccz1	N	Y
	RMC1	CG8270	N	Y
	NEITHER MitoID OR S2 affinity chromatography
	PI 3-kinase p110beta complex:				(Christoforidis et al., 1999b)
	PIK3R1	PI3K21B	N	N
	PIK3CB	PI3K92E	N	N
	Not known mammalian effectors but both MitoID AND S2 affinity chromatography
	WDR7	Rbcn-3B	Y	Y
	UHRF1BP1L	CG34126	Y	Y

## Sheet: Rab2QL known effectors plot
Gene	Drosophila gene	Known effector	S2 aff. Chrom.	WD score	Root WD score	Log Student's T-test p-value	Student's T-test Difference
CCDC186	Golgin104	1	y	11120.2	105.452	21.8822	9.08132
ARFGEF3	CG5937	Shown here	N	17877.5	133.707	20.0699	7.43603
GCC1	GCC88		y	620.603	24.9119	19.928	7.8211
BICD2	BicD		y	171.633	13.1009	18.3998	9.40414
BICD1	BicD		y	450.512	21.2253	17.4123	6.09631
COG1	CG4848	1	y	3913.5	62.558	14.0239	6.33073
TBC1D9B	CG7324		y	406.038	20.1504	12.7365	5.03966
PICK1	PICK1	1	N	6028.7	77.6447	12.6365	4.43846
SNX29	CG5439		y	6720.33	81.9776	12.5279	5.59131
BLZF1	CG9356	1	y	505.227	22.4773	9.59374	4.63164
USO1	p115	1	y	109.28	10.4537	9.27661	5.90091
RAB2A	Rab2	1	y	9568.54	97.8189	7.62111	14.4676
FAM114A2	CG9590	1	y	116.775	10.8063	7.41791	8.66129
ICA1	ICA69	1	N	8828.33	93.9592	7.23881	3.42346
INPP5B	Ocrl	1	N	113.546	10.6558	7.04669	3.58429
TBC1D25	CG8155	1	N	2183.66	46.7296	6.99608	6.06179
TMF1	CG4557	1	N	31.5639	5.61818	6.43916	8.41187
STAMBPL1	CG2224	Shown here	N	6028.7	77.6447	6.11002	3.24807
GOLGA2	GM130	1	y	21.9394	4.68395	5.07013	5.91313
GCC2	GCC185	1	y	50.6925	7.11987	4.1251	8.82194
COG4	CG7456	1	y	6.78291	2.6044	2.93473	1.79534
TBC1D16	TBC1D16		y	15.4627	3.93227	2.50034	1.44465
TRIP11	Gmap	1	y	21.5274	4.63976	2.38302	5.66352
GOLGA4	Golgin245		y	29.9801	5.47541	2.28587	6.38248

## Sheet: Rab5QL known effectors plot
Gene	Drosophila gene	Known effector	Drosophila hit	WD score	Root WD score	Log Student's T-test p-value	Student's T-test Difference
APPL1		1	absent	19402.5	139.293	28.1172	10.3011
APPL2		1	absent	15820.2	125.779	22.0383	8.49818
PIK3C3	Pi3K59F	1	Y	13612	116.67	18.391	7.27814
PPP1R21	CG6607	1	Y	11012.2	104.939	10.9095	6.00857
VPS45	Vps45	1	Y	10960.2	104.691	14.518	6.51693
VPS11	Vps11	1	N	10757	103.716	15.1802	5.8362
ANKFY1	CG41099	1	Y	10354.6	101.758	3.66974	3.12334
VPS18	dor	1	Y	9204.34	95.9393	5.0781	2.82242
UVRAG	Uvrag	1	Y	8945.08	94.5784	12.1239	4.48829
FAM160A1	CG3558	1	Y	7833.57	88.5075	11.6829	4.91516
VPS8	Vps8	1	Y	7791.39	88.2689	21.8599	9.50429
FAM160A2	CG3558	1	Y	7780.53	88.2073	10.2065	3.95021
TBCK	CG4041	Shown here	Y	7021.28	83.7931	1/3 samples	1/3 samples
EEA1		1	absent	6940.29	83.3084	27.9845	11.3856
INPP4A	CG42271	1	N	6610.74	81.3064	16.0204	6.13404
VPS33A	car	1	Y	6159.73	78.484	8.76183	3.92535
HOOK1	hook	1	Y	5359.21	73.2066	15.4202	5.90122
HTT	htt	1	Y	3110.79	55.7745	20.6646	9.63135
INPP5B	Ocrl	1	Y	2661.95	51.5941	13.7992	6.41531
NRBF2	CG42554	1	N	2128.56	46.1363	12.4722	6.24482
WDR7	Rbcn-3B		Y	1882.19	43.3842	8.59268	4.25824
OSBPL9	CG1513	Shown here	Y	1254.53	35.4194	17.4819	8.58513
PIK3R4	Vps15	1	Y	911.474	30.1906	17.0121	8.67585
RELCH		Shown here	absent	781.221	27.9503	2.35412	2.01155
RUBCN	CG12772	1	N	662.09	25.7311	8.95345	3.91825
UHRF1BP1L	CG34126		Y	556.733	23.5952	19.7882	8.68746
RBSN	Rbsn-5	1	Y	484.034	22.0008	15.3932	8.51464
VPS16	Vps16A	1	Y	454.58	21.3209	9.19699	3.7801
RABEP2	Rbpn-5	1	Y	405.036	20.1255	3.31115	2.25454
RABEP1	Rbpn-5	1	Y	348.405	18.6656	11.3822	10.7551
RABGEF1	Rabex-5	1	Y	198.636	14.0938	6.14652	5.30329
RUFY1	CG31064	1	Y	103.286	10.163	12.5391	5.67092
INPP5F	CG7956	1	Y	42.5918	6.52624	7.46513	7.66264
OCRL	Ocrl	1	Y	23.8455	4.88318	6.22404	8.37875
TBC1D15	Tbc1d15-17	1	Y	16.7519	4.0929	3.80665	6.21996
BECN1	Atg6	1	Y	15.4627	3.93227	1.70355	1.20627
