# Supplementary material for: In vivo identification of GTPase interactors by mitochondrial relocalization and proximity biotinylation
Source: eLife. 2019 Jul 11;8:e45916. doi: 10.7554/eLife.45916 (PMC6639074; doi:10.7554/eLife.45916)
Supplement: Supplementary file 3. — For each Rab form indicated in the tabs, the LFQ intensities of every protein found in at least two of the triplicates was compared to the values obtained with the GDP forms of all GTPases by using the Perseus platform. The difference, expressed as log2 of the ratio, and the P-value for the significance of the difference are shown, with these being used to generate the volcano plots shown in the figures. Also shown are the WD score for each interaction as obtained from analysis of spectral counts. Excel (.xlsx) file. [file elife-45916-supp3.xlsx]

## Sheet: BirA
Majority protein IDs	Uniprot	Gene Name	WD Score	Root WD score	Log Student's T-test p-value Rab6 QL	Student's T-test Difference Rab6 QL
sp|Q6NUQ4|TM214_HUMAN	TM214_HUMAN	TMEM214	1921.6	43.8361	7.81093	4.54908
sp|Q70UQ0|IKIP_HUMAN	IKIP_HUMAN	IKBIP	587.414	24.2366	7.26304	4.81843
sp|Q9NW13|RBM28_HUMAN	RBM28_HUMAN	RBM28	356.915	18.8922	6.8661	3.78943
sp|Q9BVK6|TMED9_HUMAN	TMED9_HUMAN	#N/A	#N/A	#N/A	6.13715	3.14832
sp|Q9H1E3|NUCKS_HUMAN	NUCKS_HUMAN	NUCKS1	4.62859	2.15142	6.08117	5.00548
sp|Q15392|DHC24_HUMAN	DHC24_HUMAN	DHCR24	15.4627	3.93227	5.87935	4.5597
sp|P62847|RS24_HUMAN	RS24_HUMAN	RPS24	2.28958	1.51314	5.87357	-3.67931
sp|Q9C0E8|LNP_HUMAN	LNP_HUMAN	LNPK	240.564	15.5101	5.73836	4.32149
sp|P04843|RPN1_HUMAN	RPN1_HUMAN	RPN1	75.1468	8.66872	5.637	6.94452
sp|P51572|BAP31_HUMAN	BAP31_HUMAN	BCAP31	42.4329	6.51405	5.39629	5.9677
sp|P27635|RL10_HUMAN	RL10_HUMAN	RPL10	4.15947	2.03948	5.34934	-2.39584
sp|O76024|WFS1_HUMAN	WFS1_HUMAN	WFS1	0	0	4.91082	2.98833
sp|Q9UM00|TMCO1_HUMAN	TMCO1_HUMAN	TMCO1	323.831	17.9953	4.90604	5.36988
sp|P62266|RS23_HUMAN	RS23_HUMAN	RPS23	3.48186	1.86597	4.82515	-3.05342
sp|Q16891|MIC60_HUMAN	MIC60_HUMAN	IMMT	52.2606	7.22915	4.7751	6.22693
sp|P11498|PYC_HUMAN	PYC_HUMAN	PC	10.395	3.22413	4.66881	-3.77561
sp|O60831|PRAF2_HUMAN	PRAF2_HUMAN	PRAF2	0	0	4.21458	3.4336
sp|P49006|MRP_HUMAN	MRP_HUMAN	MARCKSL1	34.463	5.87052	4.16103	3.80509
sp|P39748|FEN1_HUMAN	FEN1_HUMAN	FEN1	53.923	7.34323	4.13681	3.37395
sp|P19367|HXK1_HUMAN	HXK1_HUMAN	HK1	5.0311	2.24301	4.10852	-5.90845
sp|P00387|NB5R3_HUMAN	NB5R3_HUMAN	CYB5R3	54.0783	7.3538	4.03501	3.43028
sp|Q9NZ45|CISD1_HUMAN	CISD1_HUMAN	CISD1	0.50361	0.709655	4.02892	-4.05241
sp|P22234|PUR6_HUMAN	PUR6_HUMAN	PAICS	225.653	15.0218	3.99287	3.15651
sp|Q09666|AHNK_HUMAN	AHNK_HUMAN	AHNAK	3.48465	1.86672	3.8227	-6.76048
sp|P53794|SC5A3_HUMAN	SC5A3_HUMAN	SLC5A3	0	0	3.78383	2.71662
sp|Q9NX63|MIC19_HUMAN	MIC19_HUMAN	CHCHD3	0	0	3.77721	2.78164
sp|O76094|SRP72_HUMAN	SRP72_HUMAN	SRP72	291.763	17.0811	3.68926	4.45567
sp|P40222|TXLNA_HUMAN	TXLNA_HUMAN	TXLNA	108.435	10.4132	3.6743	4.73393
sp|O43402|EMC8_HUMAN	EMC8_HUMAN	EMC8	206.325	14.364	3.67051	2.98749
sp|P35241|RADI_HUMAN	RADI_HUMAN	RDX	103.948	10.1955	3.66306	2.77388
sp|Q9Y6C9|MTCH2_HUMAN	MTCH2_HUMAN	MTCH2	9.172	3.02853	3.63343	3.08632
sp|Q86Y82|STX12_HUMAN	STX12_HUMAN	STX12	36.7807	6.06471	3.61744	3.39529
sp|O95861|BPNT1_HUMAN	BPNT1_HUMAN	BPNT1	227.284	15.076	3.61496	4.34471
sp|Q9UJ14|GGT7_HUMAN	GGT7_HUMAN	GGT7	3.93784	1.9844	3.50556	3.25648
sp|Q9UJS0|CMC2_HUMAN	CMC2_HUMAN	SLC25A13	105.609	10.2766	3.49688	4.55394
sp|P55060|XPO2_HUMAN	XPO2_HUMAN	CSE1L	27.6804	5.26122	3.45481	4.87158
sp|O14828|SCAM3_HUMAN	SCAM3_HUMAN	SCAMP3	0	0	3.43903	3.64833
sp|Q86YQ8|CPNE8_HUMAN	CPNE8_HUMAN	CPNE8	0	0	3.24869	2.1683
sp|P49257|LMAN1_HUMAN	LMAN1_HUMAN	LMAN1	50.9797	7.14001	3.1257	7.34945
sp|P48047|ATPO_HUMAN	ATPO_HUMAN	ATP5PO	6.55039	2.55937	3.10396	3.73008
sp|P09661|RU2A_HUMAN	RU2A_HUMAN	SNRPA1	193.334	13.9045	3.10376	2.4993
sp|Q9UNK0|STX8_HUMAN	STX8_HUMAN	STX8	88.4054	9.40242	3.00353	2.45895
sp|Q15738|NSDHL_HUMAN	NSDHL_HUMAN	NSDHL	19.3917	4.4036	2.95522	5.00042
sp|P17844|DDX5_HUMAN	DDX5_HUMAN	DDX5	42.1909	6.49545	2.85577	2.28926
sp|Q9NW15|ANO10_HUMAN	ANO10_HUMAN	ANO10	1569.23	39.6135	2.79958	2.9687
sp|P05388|RLA0_HUMAN;sp|Q8NHW5|RLA0L_HUMAN	RLA0_HUMAN	RPLP0	4.12611	2.03128	2.71476	2.6709
sp|O43663|PRC1_HUMAN	PRC1_HUMAN	PRC1	209.358	14.4692	2.68645	3.39136
sp|O43395|PRPF3_HUMAN	PRPF3_HUMAN	PRPF3	6.30841	2.51165	2.66046	3.16253
sp|Q9UKY7|CDV3_HUMAN	CDV3_HUMAN	CDV3	0	0	2.64818	2.61851
sp|O94874|UFL1_HUMAN	UFL1_HUMAN	UFL1	13.1692	3.62894	2.60674	5.04003
sp|P02786|TFR1_HUMAN	TFR1_HUMAN	TFRC	17.6031	4.19561	2.60308	4.37691
sp|Q9NRZ9|HELLS_HUMAN	HELLS_HUMAN	HELLS	17.3379	4.16387	2.59786	4.51837
sp|P13797|PLST_HUMAN	PLST_HUMAN	PLS3	16.7404	4.0915	2.57969	3.85598
sp|Q9BQ48|RM34_HUMAN	RM34_HUMAN	MRPL34	7.11748	2.66786	2.57066	4.59397
sp|P13667|PDIA4_HUMAN	PDIA4_HUMAN	PDIA4	9.54853	3.09007	2.56174	2.73846
sp|P04181|OAT_HUMAN	OAT_HUMAN	OAT	4.62859	2.15142	2.54851	2.42703
sp|O75396|SC22B_HUMAN	SC22B_HUMAN	SEC22B	21.1227	4.59594	2.53898	2.97881
sp|P05412|JUN_HUMAN	JUN_HUMAN	JUN	31.329	5.59723	2.52148	2.83071
sp|Q9Y277|VDAC3_HUMAN	VDAC3_HUMAN	VDAC3	3.69982	1.92349	2.51912	3.47681
sp|P27824|CALX_HUMAN	CALX_HUMAN	CANX	14.584	3.8189	2.46037	5.13387
sp|P36578|RL4_HUMAN	RL4_HUMAN	RPL4	11.8271	3.43906	2.41907	3.95034
sp|P41250|GARS_HUMAN	GARS_HUMAN	GARS	2.74321	1.65626	2.41786	2.12226
sp|P22626|ROA2_HUMAN	ROA2_HUMAN	HNRNPA2B1	3.71426	1.92724	2.41739	2.69943
sp|P53985|MOT1_HUMAN	MOT1_HUMAN	SLC16A1	30.5134	5.52389	2.40466	4.86265
sp|Q96JB5|CK5P3_HUMAN	CK5P3_HUMAN	CDK5RAP3	50.4958	7.10604	2.28485	2.70621
sp|P35613|BASI_HUMAN	BASI_HUMAN	BSG	21.9257	4.68249	2.28024	4.62193
sp|P39019|RS19_HUMAN	RS19_HUMAN	RPS19	2.0355	1.42671	2.26273	3.12352
sp|Q9H6Z4|RANB3_HUMAN	RANB3_HUMAN	RANBP3	22.5812	4.75197	2.19686	3.73416
sp|P78310|CXAR_HUMAN	CXAR_HUMAN	CXADR	17.5378	4.18782	2.16653	3.32271
sp|P45880|VDAC2_HUMAN	VDAC2_HUMAN	VDAC2	23.8686	4.88555	2.15547	5.05952
sp|Q8TC07|TBC15_HUMAN	TBC15_HUMAN	TBC1D15	0.972448	0.986128	2.14541	-4.93442
sp|P78527|PRKDC_HUMAN	PRKDC_HUMAN	PRKDC	3.51578	1.87504	2.13172	-4.08874
sp|P62424|RL7A_HUMAN	RL7A_HUMAN	RPL7A	17.4463	4.17687	2.12731	3.28766
sp|Q99848|EBP2_HUMAN	EBP2_HUMAN	EBNA1BP2	219.531	14.8166	2.08403	3.79637
sp|Q14974|IMB1_HUMAN	IMB1_HUMAN	KPNB1	6.94411	2.63517	2.07931	4.18917
sp|Q8TCT9|HM13_HUMAN	HM13_HUMAN	HM13	102.399	10.1192	2.0413	4.02716
sp|Q8WW12|PCNP_HUMAN	PCNP_HUMAN	PCNP	14.0722	3.75129	2.0093	3.25713
sp|P16435|NCPR_HUMAN	NCPR_HUMAN	POR	54.212	7.36288	1.99344	3.83705
sp|Q8TCG1|CIP2A_HUMAN	CIP2A_HUMAN	CIP2A	1.60779	1.26799	1.98305	-4.3637
sp|Q8N0X7|SPG20_HUMAN	SPG20_HUMAN	SPART	0.853913	0.924074	1.97052	-3.9751
sp|O95232|LC7L3_HUMAN	LC7L3_HUMAN	LUC7L3	2.85822	1.69063	1.95389	3.22355
sp|Q9NVH0|EXD2_HUMAN	EXD2_HUMAN	EXD2	3.59625	1.89638	1.95317	-1.89727
sp|P61619|S61A1_HUMAN	S61A1_HUMAN	SEC61A1	1.18908	1.09045	1.89461	3.93858
sp|Q92667|AKAP1_HUMAN	AKAP1_HUMAN	AKAP1	6.68929	2.58637	1.89437	-2.051
sp|P18583|SON_HUMAN	SON_HUMAN	SON	2.93011	1.71176	1.88559	-2.45249
sp|P30519|HMOX2_HUMAN	HMOX2_HUMAN	HMOX2	19.2534	4.38787	1.87967	3.78647
sp|P42167|LAP2B_HUMAN	LAP2B_HUMAN	TMPO	6.58507	2.56614	1.84914	2.2701
sp|O00264|PGRC1_HUMAN	PGRC1_HUMAN	PGRMC1	49.7834	7.05573	1.84726	3.68615
sp|Q8TCJ2|STT3B_HUMAN	STT3B_HUMAN	STT3B	21.2686	4.61179	1.84723	3.02939
sp|O15173|PGRC2_HUMAN	PGRC2_HUMAN	PGRMC2	4.92777	2.21986	1.8304	1.81156
sp|P47914|RL29_HUMAN	RL29_HUMAN	RPL29	2.78526	1.66891	1.82231	2.05316
sp|P08195|4F2_HUMAN	4F2_HUMAN	#N/A	#N/A	#N/A	1.8171	2.06309
sp|Q9Y394|DHRS7_HUMAN	DHRS7_HUMAN	DHRS7	39.8454	6.31232	1.81519	3.75091
sp|P19784|CSK22_HUMAN	CSK22_HUMAN	CSNK2A2	4.7795	2.18621	1.76907	2.4623
sp|Q9UGP8|SEC63_HUMAN	SEC63_HUMAN	SEC63	14.1945	3.76755	1.7173	4.12204
sp|Q9H3N1|TMX1_HUMAN	TMX1_HUMAN	TMX1	8.45833	2.90832	1.71523	4.74783
sp|Q15758|AAAT_HUMAN	AAAT_HUMAN	#N/A	#N/A	#N/A	1.69073	2.65385
sp|E9PAV3|NACAM_HUMAN;sp|Q13765|NACA_HUMAN	NACAM_HUMAN	NACA	2.58254	1.60703	1.68904	4.32146
sp|P09651|ROA1_HUMAN;sp|Q32P51|RA1L2_HUMAN	ROA1_HUMAN	HNRNPA1	1.83798	1.35572	1.68545	2.27947
sp|P53396|ACLY_HUMAN	ACLY_HUMAN	#N/A	#N/A	#N/A	1.66103	1.73212
sp|Q99442|SEC62_HUMAN	SEC62_HUMAN	SEC62	25.682	5.06775	1.64887	4.76925
sp|P26641|EF1G_HUMAN	EF1G_HUMAN	EEF1G	73.9429	8.59901	1.64367	2.16676
sp|Q9HAU5|RENT2_HUMAN	RENT2_HUMAN	UPF2	18.563	4.30848	1.63899	3.17988
sp|P60891|PRPS1_HUMAN;sp|P21108|PRPS3_HUMAN;sp|P11908|PRPS2_HUMAN	PRPS1_HUMAN	PRPS1	2.74399	1.6565	1.63286	2.61575
sp|Q9BVC6|TM109_HUMAN	TM109_HUMAN	TMEM109	0	0	1.62881	2.48
sp|O95831|AIFM1_HUMAN	AIFM1_HUMAN	#N/A	#N/A	#N/A	1.62058	2.76142
sp|P62851|RS25_HUMAN	RS25_HUMAN	RPS25	3.62051	1.90276	1.59979	2.59128
sp|Q96QD8|S38A2_HUMAN	S38A2_HUMAN	SLC38A2	5.57538	2.36122	1.59879	4.1895
sp|P16949|STMN1_HUMAN	STMN1_HUMAN	STMN1	3.84699	1.96138	1.59572	3.08704
sp|Q9Y2J2|E41L3_HUMAN	E41L3_HUMAN	EPB41L3	1.90969	1.38192	1.59383	-3.9796
sp|O00161|SNP23_HUMAN	SNP23_HUMAN	SNAP23	0	0	1.5904	2.2502
sp|Q9BSJ8|ESYT1_HUMAN	ESYT1_HUMAN	ESYT1	2.30259	1.51743	1.58781	-4.18805
sp|O75381|PEX14_HUMAN	PEX14_HUMAN	PEX14	5.22456	2.28573	1.56532	3.69824
sp|P43307|SSRA_HUMAN	SSRA_HUMAN	SSR1	3.69505	1.92225	1.56219	4.13319
sp|Q5JTH9|RRP12_HUMAN	RRP12_HUMAN	RRP12	6.1702	2.48399	1.56216	-1.56918
sp|Q93045|STMN2_HUMAN	STMN2_HUMAN	STMN2	0	0	1.55862	3.01716
sp|Q9Y679|AUP1_HUMAN	AUP1_HUMAN	AUP1	6.15802	2.48154	1.55549	3.22911
sp|Q7Z2W4|ZCCHV_HUMAN	ZCCHV_HUMAN	ZC3HAV1	4.22052	2.05439	1.54551	-3.28246
sp|P29966|MARCS_HUMAN	MARCS_HUMAN	MARCKS	4.61415	2.14806	1.52872	3.05325
sp|P14618|KPYM_HUMAN	KPYM_HUMAN	PKM	52.44	7.24155	1.52162	2.94875
sp|Q99878|H2A1J_HUMAN;sp|Q96KK5|H2A1H_HUMAN;sp|Q9BTM1|H2AJ_HUMAN;sp|Q16777|H2A2C_HUMAN;sp|Q93077|H2A1C_HUMAN;sp|Q7L7L0|H2A3_HUMAN;sp|Q6FI13|H2A2A_HUMAN;sp|P20671|H2A1D_HUMAN;sp|P0C0S8|H2A1_HUMAN;sp|P04908|H2A1B_HUMAN;sp|Q71UI9|H2AV_HUMAN;sp|P0C0S5|H2AZ_HUMAN;sp|Q96QV6|H2A1A_HUMAN;sp|P16104|H2AX_HUMAN	H2A1J_HUMAN	HIST1H2AJ	0	0	1.51877	2.89009
sp|P17812|PYRG1_HUMAN	PYRG1_HUMAN	CTPS1	9.96006	3.15596	1.51335	3.97743
sp|Q9UBM7|DHCR7_HUMAN	DHCR7_HUMAN	DHCR7	7.74341	2.7827	1.50849	3.53344
sp|P57772|SELB_HUMAN	SELB_HUMAN	EEFSEC	7.67337	2.77008	1.50577	3.71933
sp|P49321|NASP_HUMAN	NASP_HUMAN	NASP	37.8066	6.1487	1.49562	3.87025
sp|Q9Y3T9|NOC2L_HUMAN	NOC2L_HUMAN	NOC2L	14.3224	3.78449	1.49289	2.52196
sp|Q14684|RRP1B_HUMAN	RRP1B_HUMAN	RRP1B	4.42356	2.10323	1.46544	-1.82153
sp|P11021|GRP78_HUMAN	GRP78_HUMAN	HSPA5	14.3135	3.78331	1.45875	3.69241
sp|Q8TAA9|VANG1_HUMAN	VANG1_HUMAN	VANGL1	51.5211	7.17782	1.45592	3.01928
sp|Q14739|LBR_HUMAN	LBR_HUMAN	LBR	6.92727	2.63197	1.4551	2.98309
sp|Q96C57|CL043_HUMAN	CL043_HUMAN	CUSTOS	0	0	1.45003	2.65649
sp|Q9UBC2|EP15R_HUMAN	EP15R_HUMAN	EPS15L1	1.70828	1.30701	1.44484	-3.48218
sp|Q7KZF4|SND1_HUMAN	SND1_HUMAN	SND1	1.39443	1.18086	1.44454	-3.89341
sp|P62826|RAN_HUMAN	RAN_HUMAN	RAN	1.90103	1.37878	1.43968	2.94454
sp|P41440|S19A1_HUMAN	S19A1_HUMAN	SLC19A1	21.4302	4.62927	1.43571	3.55192
sp|Q8IZH2|XRN1_HUMAN	XRN1_HUMAN	XRN1	2.04113	1.42868	1.43313	-4.82098
sp|Q96S66|CLCC1_HUMAN	CLCC1_HUMAN	CLCC1	5.93502	2.43619	1.42828	4.20753
sp|P25705|ATPA_HUMAN	ATPA_HUMAN	ATP5F1A	4.67955	2.16323	1.4245	3.33479
sp|Q86UP2|KTN1_HUMAN	KTN1_HUMAN	KTN1	9.54794	3.08997	1.40845	2.19237
sp|P60468|SC61B_HUMAN	SC61B_HUMAN	SEC61B	4.79704	2.19021	1.4055	3.37718
sp|Q86UL3|GPAT4_HUMAN	GPAT4_HUMAN	GPAT4	50.5622	7.11071	1.40486	3.27143
sp|O00541|PESC_HUMAN	PESC_HUMAN	PES1	8.42454	2.90251	1.39847	3.16708
sp|Q14318|FKBP8_HUMAN	FKBP8_HUMAN	FKBP8	1.39313	1.18031	1.39611	-2.28052
sp|O43175|SERA_HUMAN	SERA_HUMAN	PHGDH	11.3347	3.3667	1.39028	3.00481
sp|Q92575|UBXN4_HUMAN	UBXN4_HUMAN	UBXN4	2.53518	1.59223	1.38739	-2.39425
sp|Q5TC12|ATPF1_HUMAN	ATPF1_HUMAN	ATPAF1	2.62234	1.61936	1.38243	-3.19646
sp|Q9P2E9|RRBP1_HUMAN	RRBP1_HUMAN	RRBP1	14.5711	3.81721	1.36975	5.24069
sp|Q9H0S4|DDX47_HUMAN	DDX47_HUMAN	DDX47	36.2789	6.0232	1.36288	2.60921
sp|Q16181|SEPT7_HUMAN	SEPT7_HUMAN	SEPTIN7	61.6337	7.85071	1.35912	1.33042
sp|Q9Y383|LC7L2_HUMAN	LC7L2_HUMAN	LUC7L2	7.06882	2.65873	1.34862	3.86627
sp|Q71U36|TBA1A_HUMAN	TBA1A_HUMAN	TUBA1A	0	0	1.33815	-2.42537
sp|P62861|RS30_HUMAN	RS30_HUMAN	FAU	3.73695	1.93312	1.32954	1.64529
sp|Q15005|SPCS2_HUMAN	SPCS2_HUMAN	SPCS2	44.9252	6.70262	1.32468	2.03847
sp|Q70CQ3|UBP30_HUMAN	UBP30_HUMAN	USP30	1.99483	1.41239	1.32456	-3.12656
sp|O14641|DVL2_HUMAN	DVL2_HUMAN	DVL2	2.17336	1.47423	1.31936	-2.62348
sp|P07355|ANXA2_HUMAN;sp|A6NMY6|AXA2L_HUMAN	ANXA2_HUMAN	#N/A	#N/A	#N/A	1.31514	2.6617
sp|Q9P035|HACD3_HUMAN	HACD3_HUMAN	HACD3	4.29393	2.07218	1.31401	1.38446
sp|P56182|RRP1_HUMAN	RRP1_HUMAN	RRP1	5.74318	2.39649	1.30151	3.0822
sp|Q01650|LAT1_HUMAN	LAT1_HUMAN	SLC7A5	6.1069	2.47121	1.30026	3.4272
sp|Q9ULK5|VANG2_HUMAN	VANG2_HUMAN	VANGL2	3.65135	1.91085	1.30008	2.11018
sp|Q02978|M2OM_HUMAN	M2OM_HUMAN	SLC25A11	34.3358	5.85968	1.28891	2.53088
sp|P62829|RL23_HUMAN	RL23_HUMAN	RPL23	3.23847	1.79957	1.27692	-1.2096
sp|P39023|RL3_HUMAN	RL3_HUMAN	RPL3	17.0846	4.13335	1.26982	2.91465
sp|Q9ULF5|S39AA_HUMAN	S39AA_HUMAN	SLC39A10	5.47854	2.34063	1.25575	1.86661
sp|Q7Z434|MAVS_HUMAN	MAVS_HUMAN	MAVS	4.56967	2.13768	1.24041	-1.53781
sp|Q5VTE0|EF1A3_HUMAN;sp|P68104|EF1A1_HUMAN	EF1A3_HUMAN	EEF1A1P5	8.91592	2.98595	1.22457	1.09762
sp|P04406|G3P_HUMAN	G3P_HUMAN	GAPDH	12.9779	3.60249	1.21812	3.15995
sp|Q96AG4|LRC59_HUMAN	LRC59_HUMAN	LRRC59	3.17846	1.78282	1.21729	2.11763
sp|Q9NVU7|SDA1_HUMAN	SDA1_HUMAN	SDAD1	6.66724	2.5821	1.20306	4.44002
sp|Q53H12|AGK_HUMAN	AGK_HUMAN	#N/A	#N/A	#N/A	1.20235	3.109
sp|Q86UE4|LYRIC_HUMAN	LYRIC_HUMAN	MTDH	5.56347	2.3587	1.19238	3.00384
sp|P42677|RS27_HUMAN	RS27_HUMAN	RPS27	3.20525	1.79032	1.19082	-1.58403
sp|Q14789|GOGB1_HUMAN	GOGB1_HUMAN	GOLGB1	4.48299	2.11731	1.18689	-4.10139
sp|P46060|RAGP1_HUMAN	RAGP1_HUMAN	RANGAP1	17.704	4.20762	1.16852	4.27584
sp|Q9H0A0|NAT10_HUMAN	NAT10_HUMAN	NAT10	2.81062	1.67649	1.1566	-3.42853
sp|P14209|CD99_HUMAN	CD99_HUMAN	CD99	0	0	1.15534	1.54685
sp|Q9BZI7|REN3B_HUMAN	REN3B_HUMAN	UPF3B	27.005	5.19663	1.14905	2.42909
sp|P10412|H14_HUMAN	H14_HUMAN	HIST1H1E	16.4421	4.05489	1.14457	1.8543
sp|Q9HCM4|E41L5_HUMAN	E41L5_HUMAN	EPB41L5	1.84544	1.35847	1.14399	-2.8344
sp|Q9NVP1|DDX18_HUMAN	DDX18_HUMAN	DDX18	14.7765	3.84402	1.14379	3.71946
sp|O15498|YKT6_HUMAN	YKT6_HUMAN	YKT6	3.09751	1.75997	1.1418	-1.22261
sp|Q9H2G2|SLK_HUMAN	SLK_HUMAN	SLK	2.95448	1.71886	1.13452	-3.69946
sp|P61247|RS3A_HUMAN	RS3A_HUMAN	RPS3A	6.00972	2.45147	1.13055	3.40664
sp|Q5TAX3|TUT4_HUMAN	TUT4_HUMAN	TUT4	0	0	1.1085	2.66667
sp|P51532|SMCA4_HUMAN	SMCA4_HUMAN	SMARCA4	4.16515	2.04087	1.09619	1.64998
sp|Q9Y3C1|NOP16_HUMAN	NOP16_HUMAN	NOP16	17.4913	4.18226	1.09456	2.5955
sp|O00400|ACATN_HUMAN	ACATN_HUMAN	#N/A	#N/A	#N/A	1.09207	2.60953
sp|O95470|SGPL1_HUMAN	SGPL1_HUMAN	SGPL1	10.7775	3.28291	1.07663	3.49181
sp|Q8NDI1|EHBP1_HUMAN	EHBP1_HUMAN	EHBP1	3.15668	1.77671	1.06199	-2.05499
sp|Q9NS69|TOM22_HUMAN	TOM22_HUMAN	TOMM22	1.39627	1.18164	1.05619	2.60856
sp|Q8IY81|SPB1_HUMAN	SPB1_HUMAN	FTSJ3	2.23559	1.49519	1.04966	-2.05951
sp|Q92968|PEX13_HUMAN	PEX13_HUMAN	PEX13	1.03831	1.01897	1.0482	1.94401
sp|Q02952|AKA12_HUMAN	AKA12_HUMAN	#N/A	#N/A	#N/A	1.04194	-3.59132
sp|P27348|1433T_HUMAN	1433T_HUMAN	#N/A	#N/A	#N/A	1.03555	1.27162
sp|O00139|KIF2A_HUMAN	KIF2A_HUMAN	KIF2A	6.63139	2.57515	1.03448	1.46888
sp|Q9Y2W6|TDRKH_HUMAN	TDRKH_HUMAN	TDRKH	3.35276	1.83105	1.02698	-1.33062
sp|Q9UPW5|CBPC1_HUMAN	CBPC1_HUMAN	AGTPBP1	3.20112	1.78917	1.01791	-2.45556
sp|Q8IXI1|MIRO2_HUMAN	MIRO2_HUMAN	RHOT2	1.5933	1.26226	1.01206	-2.62541
sp|Q15643|TRIPB_HUMAN	TRIPB_HUMAN	TRIP11	1.57599	1.25538	0.994647	-3.84666
sp|Q9UHB9|SRP68_HUMAN	SRP68_HUMAN	SRP68	16.3133	4.03898	0.994312	3.05773
sp|Q02878|RL6_HUMAN	RL6_HUMAN	RPL6	27.4548	5.23973	0.993864	2.85338
sp|Q14674|ESPL1_HUMAN	ESPL1_HUMAN	ESPL1	0	0	0.992215	2.12001
sp|O95433|AHSA1_HUMAN	AHSA1_HUMAN	#N/A	#N/A	#N/A	0.991288	2.05066
sp|P49368|TCPG_HUMAN	TCPG_HUMAN	CCT3	23.6274	4.86081	0.990519	2.15697
sp|Q92841|DDX17_HUMAN	DDX17_HUMAN	DDX17	260.916	16.1529	0.987965	2.37889
sp|Q9NQC3|RTN4_HUMAN	RTN4_HUMAN	RTN4	7.94854	2.81932	0.98442	3.3208
sp|Q07157|ZO1_HUMAN	ZO1_HUMAN	TJP1	0	0	0.97346	1.83109
sp|P53007|TXTP_HUMAN	TXTP_HUMAN	SLC25A1	11.4251	3.38011	0.971716	2.54058
sp|Q13596|SNX1_HUMAN	SNX1_HUMAN	SNX1	6.46934	2.54349	0.967599	2.84135
sp|P68431|H31_HUMAN;sp|Q71DI3|H32_HUMAN;sp|Q16695|H31T_HUMAN;sp|P84243|H33_HUMAN;sp|Q6NXT2|H3C_HUMAN	H31_HUMAN	HIST1H3A	0	0	0.966693	2.89901
sp|P83731|RL24_HUMAN	RL24_HUMAN	RPL24	3.59857	1.89699	0.96144	-1.03609
sp|P61254|RL26_HUMAN	RL26_HUMAN	RPL26	6.09932	2.46968	0.958894	1.18059
sp|Q9P0K7|RAI14_HUMAN	RAI14_HUMAN	RAI14	2.22043	1.49011	0.955022	-3.12126
sp|P10809|CH60_HUMAN	CH60_HUMAN	HSPD1	4.66279	2.15935	0.951277	2.63072
sp|Q96EY4|TMA16_HUMAN	TMA16_HUMAN	TMA16	6.26509	2.50302	0.94941	2.97613
sp|Q9Y6I9|TX264_HUMAN	TX264_HUMAN	TEX264	0	0	0.944578	2.2975
sp|P04075|ALDOA_HUMAN	ALDOA_HUMAN	#N/A	#N/A	#N/A	0.944573	2.42583
sp|P30050|RL12_HUMAN	RL12_HUMAN	RPL12	4.08605	2.0214	0.943442	1.32235
sp|P84077|ARF1_HUMAN;sp|P61204|ARF3_HUMAN	ARF1_HUMAN	#N/A	#N/A	#N/A	0.943034	-1.43993
sp|P62269|RS18_HUMAN	RS18_HUMAN	RPS18	3.93304	1.98319	0.942319	2.0706
sp|Q9H2J7|S6A15_HUMAN	S6A15_HUMAN	SLC6A15	6.00661	2.45084	0.942305	1.5285
sp|Q5C9Z4|NOM1_HUMAN	NOM1_HUMAN	NOM1	2.79861	1.67291	0.936751	-2.07032
sp|Q9H2H9|S38A1_HUMAN	S38A1_HUMAN	SLC38A1	4.46993	2.11422	0.934497	3.37158
sp|Q99733|NP1L4_HUMAN	NP1L4_HUMAN	NAP1L4	1.81872	1.3486	0.934467	2.1882
sp|Q8WWK9|CKAP2_HUMAN	CKAP2_HUMAN	CKAP2	0	0	0.929274	1.02766
sp|O60749|SNX2_HUMAN	SNX2_HUMAN	SNX2	20.834	4.56443	0.92722	1.94556
sp|Q96A33|CCD47_HUMAN	CCD47_HUMAN	CCDC47	5.83367	2.4153	0.926709	2.69857
sp|P62917|RL8_HUMAN	RL8_HUMAN	RPL8	17.037	4.12759	0.925722	2.65236
sp|Q9UI10|EI2BD_HUMAN	EI2BD_HUMAN	EIF2B4	6.40695	2.53119	0.925486	1.67132
sp|Q8TBA6|GOGA5_HUMAN	GOGA5_HUMAN	GOLGA5	5.33471	2.3097	0.915346	3.06211
sp|Q00341|VIGLN_HUMAN	VIGLN_HUMAN	HDLBP	3.54731	1.88343	0.913993	-3.46539
sp|Q9UBF2|COPG2_HUMAN	COPG2_HUMAN	COPG2	5.30021	2.30222	0.913213	2.64737
sp|Q13283|G3BP1_HUMAN	G3BP1_HUMAN	G3BP1	0	0	0.910086	1.55753
sp|P51610|HCFC1_HUMAN	HCFC1_HUMAN	HCFC1	1.92154	1.3862	0.909711	-3.28496
sp|P20340|RAB6A_HUMAN	RAB6A_HUMAN	RAB6A	1.23858	1.11291	0.909462	-3.33274
sp|P51149|RAB7A_HUMAN	RAB7A_HUMAN	RAB7A	4.9379	2.22214	0.889385	-3.20652
sp|Q96HS1|PGAM5_HUMAN	PGAM5_HUMAN	PGAM5	2.72877	1.6519	0.884121	1.75137
sp|Q9H3U1|UN45A_HUMAN	UN45A_HUMAN	UNC45A	1.66587	1.29069	0.883122	-3.33954
sp|Q07065|CKAP4_HUMAN	CKAP4_HUMAN	CKAP4	7.78638	2.79041	0.882863	1.85504
sp|Q96KC8|DNJC1_HUMAN	DNJC1_HUMAN	DNAJC1	32.8872	5.73473	0.882132	1.48384
sp|Q86UB9|TM135_HUMAN	TM135_HUMAN	TMEM135	12.3372	3.51243	0.872878	2.06936
sp|O60841|IF2P_HUMAN	IF2P_HUMAN	EIF5B	6.12961	2.4758	0.869958	2.49365
sp|Q9HCK8|CHD8_HUMAN	CHD8_HUMAN	CHD8	1.0295	1.01464	0.868793	-3.97202
sp|Q00325|MPCP_HUMAN	MPCP_HUMAN	SLC25A3	4.79218	2.1891	0.868622	1.6306
sp|Q00059|TFAM_HUMAN	TFAM_HUMAN	TFAM	0	0	0.865986	1.22547
sp|Q04637|IF4G1_HUMAN	IF4G1_HUMAN	EIF4G1	2.79886	1.67298	0.857921	-3.02533
sp|Q13459|MYO9B_HUMAN	MYO9B_HUMAN	MYO9B	3.13053	1.76933	0.856658	-2.8708
sp|Q9BZF9|UACA_HUMAN	UACA_HUMAN	UACA	2.78013	1.66737	0.853607	-2.59789
sp|P62280|RS11_HUMAN	RS11_HUMAN	RPS11	3.86824	1.96678	0.839002	2.45239
sp|P21397|AOFA_HUMAN	AOFA_HUMAN	#N/A	#N/A	#N/A	0.828842	-4.21808
sp|O14737|PDCD5_HUMAN	PDCD5_HUMAN	PDCD5	1.95055	1.39662	0.828248	1.2541
sp|Q9UNQ2|DIM1_HUMAN	DIM1_HUMAN	DIMT1	3.06351	1.75029	0.825781	1.23763
sp|P15880|RS2_HUMAN	RS2_HUMAN	RPS2	3.33331	1.82574	0.824831	1.52803
sp|P12956|XRCC6_HUMAN	XRCC6_HUMAN	XRCC6	4.08771	2.02181	0.824403	1.17664
sp|Q5JTV8|TOIP1_HUMAN	TOIP1_HUMAN	TOR1AIP1	4.13351	2.0331	0.821119	1.80027
sp|P50851|LRBA_HUMAN	LRBA_HUMAN	LRBA	1.95358	1.39771	0.807925	-3.23948
sp|Q9BZE4|NOG1_HUMAN	NOG1_HUMAN	GTPBP4	6.52967	2.55532	0.803869	2.77785
sp|O95292|VAPB_HUMAN	VAPB_HUMAN	VAPB	4.5421	2.13122	0.801628	1.99433
sp|Q8NBN3|TM87A_HUMAN	TM87A_HUMAN	TMEM87A	8.91934	2.98653	0.800742	2.63338
sp|P08865|RSSA_HUMAN	RSSA_HUMAN	RPSA	3.26672	1.80741	0.800549	1.39979
sp|P82094|TMF1_HUMAN	TMF1_HUMAN	TMF1	1.72406	1.31304	0.798705	-2.30877
sp|P11940|PABP1_HUMAN	PABP1_HUMAN	PABPC1	2.71458	1.6476	0.788594	1.62183
sp|P23381|SYWC_HUMAN	SYWC_HUMAN	WARS	0	0	0.784646	1.51677
sp|O75915|PRAF3_HUMAN	PRAF3_HUMAN	ARL6IP5	12.4694	3.5312	0.783832	2.00658
sp|P63092|GNAS2_HUMAN;sp|Q5JWF2|GNAS1_HUMAN	GNAS2_HUMAN	#N/A	#N/A	#N/A	0.776582	1.35488
sp|P83881|RL36A_HUMAN	RL36A_HUMAN	RPL36A	5.02091	2.24074	0.776301	-0.916468
sp|Q9Y5M8|SRPRB_HUMAN	SRPRB_HUMAN	SRPRB	10.1076	3.17925	0.766842	2.71262
sp|Q06830|PRDX1_HUMAN	PRDX1_HUMAN	PRDX1	3.99717	1.99929	0.766216	1.07279
sp|Q5HYI7|MTX3_HUMAN	MTX3_HUMAN	MTX3	0.68313	0.826517	0.761194	-2.0936
sp|O60271|JIP4_HUMAN	JIP4_HUMAN	SPAG9	7.483	2.73551	0.760673	2.27987
sp|Q15417|CNN3_HUMAN	CNN3_HUMAN	CNN3	0.733799	0.856621	0.756218	-2.37689
sp|Q13190|STX5_HUMAN	STX5_HUMAN	STX5	4.39498	2.09642	0.751206	2.68282
sp|P62854|RS26_HUMAN;sp|Q5JNZ5|RS26L_HUMAN	RS26_HUMAN	RPS26	1.57865	1.25644	0.748573	-0.911917
sp|P62750|RL23A_HUMAN	RL23A_HUMAN	RPL23A	4.34211	2.08377	0.747541	0.838047
sp|P60842|IF4A1_HUMAN	IF4A1_HUMAN	EIF4A1	4.83674	2.19926	0.737147	2.14796
sp|Q59GN2|R39L5_HUMAN;sp|P62891|RL39_HUMAN	R39L5_HUMAN	RPL39P5	0	0	0.734874	-2.08783
sp|P57088|TMM33_HUMAN	TMM33_HUMAN	TMEM33	3.98484	1.99621	0.733348	1.42688
sp|P61313|RL15_HUMAN	RL15_HUMAN	RPL15	0	0	0.73278	1.37101
sp|Q99614|TTC1_HUMAN	TTC1_HUMAN	TTC1	0	0	0.73206	1.9287
sp|Q7L0Y3|MRRP1_HUMAN	MRRP1_HUMAN	TRMT10C	2.68818	1.63957	0.730654	1.4485
sp|P48067|SC6A9_HUMAN	SC6A9_HUMAN	SLC6A9	4.7074	2.16965	0.729481	1.20144
sp|Q9Y4P3|TBL2_HUMAN	TBL2_HUMAN	TBL2	3.22519	1.79588	0.71603	2.10738
sp|Q9GZY8|MFF_HUMAN	MFF_HUMAN	MFF	1.25787	1.12155	0.715758	-2.26103
sp|Q9BQ52|RNZ2_HUMAN	RNZ2_HUMAN	ELAC2	0	0	0.714001	1.64493
sp|Q8NC51|PAIRB_HUMAN	PAIRB_HUMAN	SERBP1	3.37762	1.83783	0.713686	2.33958
sp|Q15836|VAMP3_HUMAN	VAMP3_HUMAN	VAMP3	0.85308	0.923623	0.713133	1.8674
sp|Q15056|IF4H_HUMAN	IF4H_HUMAN	EIF4H	3.87987	1.96974	0.710128	2.07414
sp|Q92522|H1X_HUMAN	H1X_HUMAN	H1FX	4.39174	2.09565	0.708897	2.33947
sp|Q13085|ACACA_HUMAN	ACACA_HUMAN	#N/A	#N/A	#N/A	0.698999	-1.11348
sp|Q6WKZ4|RFIP1_HUMAN	RFIP1_HUMAN	RAB11FIP1	5.76302	2.40063	0.697601	2.17798
sp|P54136|SYRC_HUMAN	SYRC_HUMAN	RARS	144.648	12.027	0.697476	1.41169
sp|P62244|RS15A_HUMAN	RS15A_HUMAN	RPS15A	2.32436	1.52459	0.697365	2.25987
sp|P05023|AT1A1_HUMAN	AT1A1_HUMAN	#N/A	#N/A	#N/A	0.697178	2.08284
sp|P13861|KAP2_HUMAN	KAP2_HUMAN	PRKAR2A	3.75764	1.93846	0.683544	2.12751
sp|P49069|CAMLG_HUMAN	CAMLG_HUMAN	#N/A	#N/A	#N/A	0.679279	1.83176
sp|Q13325|IFIT5_HUMAN	IFIT5_HUMAN	IFIT5	0.644647	0.802899	0.675594	-1.54212
sp|Q3ZCQ8|TIM50_HUMAN	TIM50_HUMAN	TIMM50	2.79821	1.67279	0.674164	1.81616
sp|Q96AY4|TTC28_HUMAN	TTC28_HUMAN	TTC28	0.523937	0.723835	0.673334	-3.07061
sp|P07195|LDHB_HUMAN	LDHB_HUMAN	LDHB	10.6362	3.26132	0.671023	1.75389
sp|Q9NYU2|UGGG1_HUMAN	UGGG1_HUMAN	UGGT1	193.076	13.8952	0.664131	1.38441
sp|P62701|RS4X_HUMAN	RS4X_HUMAN	RPS4X	4.6572	2.15805	0.659529	1.08083
sp|P23396|RS3_HUMAN	RS3_HUMAN	RPS3	5.73521	2.39483	0.644402	1.93506
sp|P53367|ARFP1_HUMAN	ARFP1_HUMAN	#N/A	#N/A	#N/A	0.64175	1.37563
sp|P46782|RS5_HUMAN	RS5_HUMAN	RPS5	7.38794	2.71808	0.638239	2.07339
sp|Q9UHR5|S30BP_HUMAN	S30BP_HUMAN	SAP30BP	0	0	0.635801	1.28092
sp|P62263|RS14_HUMAN	RS14_HUMAN	RPS14	3.10074	1.76089	0.627969	1.66059
sp|O14683|P5I11_HUMAN	P5I11_HUMAN	TP53I11	31.9448	5.65197	0.625128	1.65896
sp|Q96RL7|VP13A_HUMAN	VP13A_HUMAN	VPS13A	0.56721	0.753133	0.622973	-2.58393
sp|P33981|TTK_HUMAN	TTK_HUMAN	TTK	0.649374	0.805838	0.622546	-2.15685
sp|O95819|M4K4_HUMAN	M4K4_HUMAN	MAP4K4	3.27513	1.80973	0.617975	-2.15262
sp|Q5VV42|CDKAL_HUMAN	CDKAL_HUMAN	CDKAL1	1.11488	1.05588	0.614829	-1.78271
sp|Q13439|GOGA4_HUMAN	GOGA4_HUMAN	GOLGA4	1.43284	1.19701	0.614799	-3.26623
sp|P35659|DEK_HUMAN	DEK_HUMAN	DEK	2.86514	1.69267	0.614081	1.26943
sp|Q9Y4W6|AFG32_HUMAN	AFG32_HUMAN	#N/A	#N/A	#N/A	0.604904	-1.98502
sp|P62913|RL11_HUMAN	RL11_HUMAN	RPL11	3.29956	1.81647	0.604183	1.22531
sp|P62979|RS27A_HUMAN;sp|P0CG47|UBB_HUMAN;sp|P0CG48|UBC_HUMAN	RS27A_HUMAN	RPS27A	4.37619	2.09194	0.596981	-0.544835
sp|Q9BXW9|FACD2_HUMAN	FACD2_HUMAN	FANCD2	5.56174	2.35833	0.596268	1.47071
sp|Q9BVP2|GNL3_HUMAN	GNL3_HUMAN	GNL3	7.3926	2.71893	0.594786	-0.657792
sp|P36542|ATPG_HUMAN	ATPG_HUMAN	#N/A	#N/A	#N/A	0.59236	1.94908
sp|O43865|SAHH2_HUMAN	SAHH2_HUMAN	AHCYL1	0	0	0.584093	0.795941
sp|P09874|PARP1_HUMAN	PARP1_HUMAN	PARP1	4.00102	2.00025	0.570382	-1.03492
sp|O15063|K0355_HUMAN	K0355_HUMAN	KIAA0355	0	0	0.569871	3.33012
sp|P15311|EZRI_HUMAN	EZRI_HUMAN	EZR	6.17547	2.48505	0.569334	1.56142
sp|Q8WTT2|NOC3L_HUMAN	NOC3L_HUMAN	NOC3L	3.41787	1.84875	0.566317	-1.6518
sp|Q08378|GOGA3_HUMAN	GOGA3_HUMAN	GOLGA3	11.1886	3.34494	0.565109	1.45973
sp|P16615|AT2A2_HUMAN	AT2A2_HUMAN	#N/A	#N/A	#N/A	0.564722	2.04639
sp|Q9H6T3|RPAP3_HUMAN	RPAP3_HUMAN	RPAP3	2.06339	1.43645	0.5569	1.93211
sp|P61978|HNRPK_HUMAN	HNRPK_HUMAN	HNRNPK	4.65486	2.15751	0.551249	1.65094
sp|P12277|KCRB_HUMAN	KCRB_HUMAN	CKB	23.5884	4.85678	0.551007	0.963256
sp|P10599|THIO_HUMAN	THIO_HUMAN	TXN	0	0	0.550876	1.17198
sp|Q9UG63|ABCF2_HUMAN	ABCF2_HUMAN	#N/A	#N/A	#N/A	0.550369	1.88925
sp|P07900|HS90A_HUMAN	HS90A_HUMAN	HSP90AA1	7.83941	2.79989	0.549317	1.99326
sp|P30041|PRDX6_HUMAN	PRDX6_HUMAN	PRDX6	0	0	0.548675	0.943067
sp|Q9BXK5|B2L13_HUMAN	B2L13_HUMAN	#N/A	#N/A	#N/A	0.54747	-1.17989
sp|Q07020|RL18_HUMAN	RL18_HUMAN	RPL18	4.19218	2.04748	0.54503	1.7509
sp|P26373|RL13_HUMAN	RL13_HUMAN	RPL13	3.42315	1.85018	0.534137	0.782558
sp|O95372|LYPA2_HUMAN	LYPA2_HUMAN	LYPLA2	2.19374	1.48113	0.524257	1.76108
sp|Q96MW1|CCD43_HUMAN	CCD43_HUMAN	#N/A	#N/A	#N/A	0.523806	1.71248
sp|Q9NWT8|AKIP_HUMAN	AKIP_HUMAN	#N/A	#N/A	#N/A	0.5219	2.05087
sp|P17480|UBF1_HUMAN	UBF1_HUMAN	UBTF	2.47065	1.57183	0.521783	1.36102
sp|P46939|UTRO_HUMAN	UTRO_HUMAN	UTRN	0.814174	0.902316	0.519432	-2.62678
sp|Q9H444|CHM4B_HUMAN	CHM4B_HUMAN	CHMP4B	0	0	0.51068	1.3671
sp|Q15648|MED1_HUMAN	MED1_HUMAN	MED1	2.07411	1.44018	0.509758	0.848988
sp|O15027|SC16A_HUMAN	SC16A_HUMAN	SEC16A	0	0	0.508314	-1.6245
sp|Q14103|HNRPD_HUMAN	HNRPD_HUMAN	HNRNPD	0	0	0.5077	0.925967
sp|P60866|RS20_HUMAN	RS20_HUMAN	RPS20	2.63767	1.62409	0.504851	1.73837
sp|Q9BU76|MMTA2_HUMAN	MMTA2_HUMAN	MMTAG2	3.28502	1.81246	0.503205	-0.702001
sp|P25205|MCM3_HUMAN	MCM3_HUMAN	MCM3	0.758093	0.870685	0.4986	-1.45347
sp|P55011|S12A2_HUMAN	S12A2_HUMAN	SLC12A2	4.45018	2.10954	0.496104	0.928189
sp|P27816|MAP4_HUMAN	MAP4_HUMAN	MAP4	5.58878	2.36406	0.487875	2.04019
sp|P07305|H10_HUMAN	H10_HUMAN	H1F0	3.6611	1.9134	0.487604	1.88395
sp|Q13427|PPIG_HUMAN	PPIG_HUMAN	PPIG	0	0	0.486676	-1.68888
sp|P63261|ACTG_HUMAN;sp|P60709|ACTB_HUMAN	ACTG_HUMAN	#N/A	#N/A	#N/A	0.482965	1.05548
sp|O00567|NOP56_HUMAN	NOP56_HUMAN	NOP56	5.34864	2.31271	0.481327	2.00909
sp|Q8NEN9|PDZD8_HUMAN	PDZD8_HUMAN	PDZD8	3.57579	1.89098	0.480509	-1.93584
sp|Q5T3I0|GPTC4_HUMAN	GPTC4_HUMAN	GPATCH4	3.02206	1.73841	0.477562	-1.41926
sp|Q92616|GCN1_HUMAN	GCN1_HUMAN	GCN1	2.46473	1.56994	0.476937	1.76424
sp|Q9GZS1|RPA49_HUMAN	RPA49_HUMAN	POLR1E	5.73921	2.39567	0.475546	1.04543
sp|Q6Y7W6|GGYF2_HUMAN	GGYF2_HUMAN	GIGYF2	3.73335	1.93219	0.463797	-1.57431
sp|Q13136|LIPA1_HUMAN	LIPA1_HUMAN	PPFIA1	4.54142	2.13106	0.462232	-1.21739
sp|Q9UQ35|SRRM2_HUMAN	SRRM2_HUMAN	SRRM2	0.543225	0.737038	0.460529	-2.26224
sp|Q5HYI8|RABL3_HUMAN	RABL3_HUMAN	RABL3	1.83974	1.35637	0.455619	1.67481
sp|P11717|MPRI_HUMAN	MPRI_HUMAN	IGF2R	4.44539	2.10841	0.454343	1.79607
sp|E9PRG8|CK098_HUMAN	CK098_HUMAN	C11orf98	4.51535	2.12494	0.453873	1.39629
sp|Q9NVN8|GNL3L_HUMAN	GNL3L_HUMAN	GNL3L	3.04035	1.74366	0.453331	-1.54138
sp|Q9Y285|SYFA_HUMAN	SYFA_HUMAN	FARSA	2.54615	1.59567	0.448947	0.751793
sp|P14625|ENPL_HUMAN	ENPL_HUMAN	HSP90B1	2.75338	1.65933	0.448095	1.53143
sp|O43491|E41L2_HUMAN	E41L2_HUMAN	EPB41L2	4.70382	2.16883	0.445734	1.47417
sp|P50402|EMD_HUMAN	EMD_HUMAN	EMD	2.83063	1.68245	0.445162	1.25527
sp|Q9UPQ3|AGAP1_HUMAN	AGAP1_HUMAN	#N/A	#N/A	#N/A	0.443982	-1.40271
sp|P62241|RS8_HUMAN	RS8_HUMAN	RPS8	3.27366	1.80933	0.443396	0.562473
sp|P63173|RL38_HUMAN	RL38_HUMAN	RPL38	1.85395	1.3616	0.441764	1.46275
sp|P54886|P5CS_HUMAN	P5CS_HUMAN	ALDH18A1	0	0	0.439582	0.779014
sp|P46108|CRK_HUMAN	CRK_HUMAN	CRK	2.74578	1.65704	0.439408	-1.0129
sp|Q8IWS0|PHF6_HUMAN	PHF6_HUMAN	PHF6	0.725928	0.852014	0.436728	1.6201
sp|Q562R1|ACTBL_HUMAN	ACTBL_HUMAN	#N/A	#N/A	#N/A	0.434385	1.48498
sp|P10321|1C07_HUMAN;sp|Q31612|1B73_HUMAN;sp|Q29963|1C06_HUMAN;sp|Q29960|1C16_HUMAN;sp|Q07000|1C15_HUMAN;sp|P30508|1C12_HUMAN;sp|P30501|1C02_HUMAN;sp|Q95604|1C17_HUMAN	1C07_HUMAN	#N/A	#N/A	#N/A	0.429302	0.592587
sp|P48444|COPD_HUMAN	COPD_HUMAN	ARCN1	15.7113	3.96375	0.427152	1.38238
sp|Q15054|DPOD3_HUMAN	DPOD3_HUMAN	POLD3	2.57741	1.60543	0.426331	0.866971
sp|O43143|DHX15_HUMAN	DHX15_HUMAN	DHX15	3.69148	1.92132	0.418344	-1.4291
sp|Q9Y3F4|STRAP_HUMAN	STRAP_HUMAN	STRAP	2.71269	1.64702	0.417576	1.02005
sp|P38646|GRP75_HUMAN	GRP75_HUMAN	HSPA9	10.1765	3.19006	0.41445	1.69268
sp|Q3YEC7|RABL6_HUMAN	RABL6_HUMAN	RABL6	3.04759	1.74573	0.412188	-1.57456
sp|P31943|HNRH1_HUMAN	HNRH1_HUMAN	HNRNPH1	0	0	0.408642	0.567138
sp|O75179|ANR17_HUMAN	ANR17_HUMAN	#N/A	#N/A	#N/A	0.40688	-1.85062
sp|P68363|TBA1B_HUMAN	TBA1B_HUMAN	TUBA1B	6.5702	2.56324	0.406844	-0.418123
sp|P48029|SC6A8_HUMAN	SC6A8_HUMAN	SLC6A8	9.92444	3.15031	0.398591	1.12848
sp|P52565|GDIR1_HUMAN	GDIR1_HUMAN	#N/A	#N/A	#N/A	0.39814	0.538474
sp|P46778|RL21_HUMAN	RL21_HUMAN	RPL21	2.9699	1.72334	0.391752	-1.33366
sp|P46779|RL28_HUMAN	RL28_HUMAN	RPL28	3.06518	1.75077	0.390375	0.69926
sp|O00571|DDX3X_HUMAN;sp|O15523|DDX3Y_HUMAN	DDX3X_HUMAN	DDX3X	3.61542	1.90143	0.390222	1.51687
sp|A5YKK6|CNOT1_HUMAN	CNOT1_HUMAN	CNOT1	2.09698	1.4481	0.389168	1.18649
sp|Q9Y6M7|S4A7_HUMAN	S4A7_HUMAN	SLC4A7	5.95152	2.43957	0.386455	1.63608
sp|Q9NYV4|CDK12_HUMAN	CDK12_HUMAN	#N/A	#N/A	#N/A	0.386166	0.999134
sp|Q9Y6B6|SAR1B_HUMAN	SAR1B_HUMAN	SAR1B	0	0	0.381658	-0.967653
sp|Q7Z569|BRAP_HUMAN	BRAP_HUMAN	#N/A	#N/A	#N/A	0.381108	-1.03311
sp|P50416|CPT1A_HUMAN	CPT1A_HUMAN	CPT1A	2.49907	1.58084	0.375169	-1.31657
sp|P00338|LDHA_HUMAN	LDHA_HUMAN	LDHA	2.18647	1.47867	0.37405	1.33144
sp|P63241|IF5A1_HUMAN;sp|Q6IS14|IF5AL_HUMAN;sp|Q9GZV4|IF5A2_HUMAN	IF5A1_HUMAN	EIF5A	0.997573	0.998786	0.369828	1.12254
sp|Q5JSH3|WDR44_HUMAN	WDR44_HUMAN	WDR44	7.42758	2.72536	0.369441	1.48956
sp|O75400|PR40A_HUMAN	PR40A_HUMAN	PRPF40A	2.94288	1.71548	0.368348	-1.45045
sp|P08708|RS17_HUMAN	RS17_HUMAN	RPS17	3.13007	1.7692	0.36596	1.20579
sp|Q8WVX9|FACR1_HUMAN	FACR1_HUMAN	FAR1	0	0	0.365545	0.716732
sp|Q12931|TRAP1_HUMAN	TRAP1_HUMAN	TRAP1	4.59464	2.14351	0.361324	1.28243
sp|O00483|NDUA4_HUMAN	NDUA4_HUMAN	NDUFA4	1.32153	1.14958	0.359096	1.10603
sp|Q9NX58|LYAR_HUMAN	LYAR_HUMAN	LYAR	4.70402	2.16887	0.358527	-0.630806
sp|Q9Y388|RBMX2_HUMAN	RBMX2_HUMAN	RBMX2	2.27458	1.50817	0.355773	1.09281
sp|O60645|EXOC3_HUMAN	EXOC3_HUMAN	EXOC3	2.02294	1.4223	0.348678	0.826564
sp|Q71UM5|RS27L_HUMAN	RS27L_HUMAN	RPS27L	0	0	0.347443	-1.71292
sp|P17987|TCPA_HUMAN	TCPA_HUMAN	TCP1	4.57144	2.13809	0.346279	1.41673
sp|P48643|TCPE_HUMAN	TCPE_HUMAN	CCT5	1.94458	1.39448	0.344623	1.07899
sp|A0FGR8|ESYT2_HUMAN	ESYT2_HUMAN	ESYT2	2.20479	1.48485	0.344457	-1.17973
sp|P22392|NDKB_HUMAN;sp|O60361|NDK8_HUMAN	NDKB_HUMAN	NME2	0	0	0.340027	-1.19111
sp|Q96GQ7|DDX27_HUMAN	DDX27_HUMAN	DDX27	5.46032	2.33673	0.333116	-1.4196
sp|P42704|LPPRC_HUMAN	LPPRC_HUMAN	LRPPRC	3.22437	1.79565	0.331545	-1.74355
sp|Q8N6T3|ARFG1_HUMAN	ARFG1_HUMAN	#N/A	#N/A	#N/A	0.330268	1.12266
sp|P62937|PPIA_HUMAN	PPIA_HUMAN	PPIA	1.14244	1.06885	0.329123	-1.04123
sp|P51648|AL3A2_HUMAN	AL3A2_HUMAN	#N/A	#N/A	#N/A	0.328651	-0.385231
sp|Q05682|CALD1_HUMAN	CALD1_HUMAN	#N/A	#N/A	#N/A	0.326652	1.24665
sp|Q9NVI7|ATD3A_HUMAN	ATD3A_HUMAN	#N/A	#N/A	#N/A	0.326306	1.10044
sp|Q9Y265|RUVB1_HUMAN	RUVB1_HUMAN	RUVBL1	3.75451	1.93765	0.323553	1.2949
sp|P36405|ARL3_HUMAN	ARL3_HUMAN	ARL3	0	0	0.322924	-0.511276
sp|Q92692|NECT2_HUMAN	NECT2_HUMAN	NECTIN2	1.75765	1.32576	0.322368	0.689588
sp|Q13586|STIM1_HUMAN	STIM1_HUMAN	STIM1	4.2798	2.06877	0.320981	-1.38387
sp|Q9UNX3|RL26L_HUMAN	RL26L_HUMAN	RPL26L1	9.6236	3.10219	0.313958	1.30255
sp|Q9NP64|NO40_HUMAN	NO40_HUMAN	ZCCHC17	0	0	0.311806	1.04146
sp|O75643|U520_HUMAN	U520_HUMAN	SNRNP200	1.58341	1.25834	0.308841	1.04115
sp|P62273|RS29_HUMAN	RS29_HUMAN	RPS29	1.70417	1.30544	0.307096	-1.53136
sp|Q8N9N7|LRC57_HUMAN	LRC57_HUMAN	LRRC57	0	0	0.306064	-0.826361
sp|Q02790|FKBP4_HUMAN	FKBP4_HUMAN	FKBP4	0	0	0.304363	-0.932425
sp|Q6P1L8|RM14_HUMAN	RM14_HUMAN	MRPL14	0	0	0.29995	0.516758
sp|Q9H5V9|CX056_HUMAN	CX056_HUMAN	CXorf56	3.48804	1.86763	0.29945	1.22062
sp|Q15233|NONO_HUMAN	NONO_HUMAN	NONO	7.81645	2.79579	0.298611	-1.21487
sp|O14776|TCRG1_HUMAN	TCRG1_HUMAN	TCERG1	2.01995	1.42125	0.298219	0.93648
sp|Q07960|RHG01_HUMAN	RHG01_HUMAN	ARHGAP1	7.39023	2.7185	0.295405	1.65893
sp|Q9NQG6|MID51_HUMAN	MID51_HUMAN	MIEF1	3.27323	1.80921	0.292512	-0.939594
sp|P28288|ABCD3_HUMAN	ABCD3_HUMAN	#N/A	#N/A	#N/A	0.291064	0.456084
sp|P46776|RL27A_HUMAN	RL27A_HUMAN	RPL27A	3.085	1.75642	0.289901	-0.461663
sp|Q14247|SRC8_HUMAN	SRC8_HUMAN	CTTN	3.90706	1.97663	0.288026	0.954199
sp|P19338|NUCL_HUMAN	NUCL_HUMAN	NCL	4.60067	2.14492	0.287714	1.24882
sp|P61353|RL27_HUMAN	RL27_HUMAN	RPL27	1.47754	1.21554	0.284439	0.959669
sp|P18621|RL17_HUMAN	RL17_HUMAN	RPL17	3.19012	1.78609	0.281661	-0.326542
sp|Q9UNZ2|NSF1C_HUMAN	NSF1C_HUMAN	NSFL1C	2.17866	1.47603	0.281291	0.738621
sp|P50990|TCPQ_HUMAN	TCPQ_HUMAN	CCT8	8.31556	2.88367	0.277886	-0.608787
sp|P06748|NPM_HUMAN	NPM_HUMAN	NPM1	5.08613	2.25524	0.276134	1.05845
sp|O75683|SURF6_HUMAN	SURF6_HUMAN	SURF6	2.15324	1.46739	0.276131	-1.29968
sp|P52292|IMA1_HUMAN	IMA1_HUMAN	KPNA2	2.40084	1.54946	0.270889	0.793614
sp|P0DMV9|HS71B_HUMAN;sp|P0DMV8|HS71A_HUMAN	HS71B_HUMAN	HSPA1B	0	0	0.270655	-0.692263
sp|P37802|TAGL2_HUMAN	TAGL2_HUMAN	TAGLN2	3.80252	1.95001	0.270653	0.665953
sp|Q32MZ4|LRRF1_HUMAN	LRRF1_HUMAN	LRRFIP1	13.0106	3.60703	0.268962	0.712026
sp|Q1ED39|KNOP1_HUMAN	KNOP1_HUMAN	KNOP1	3.50414	1.87194	0.260654	0.946327
sp|P12270|TPR_HUMAN	TPR_HUMAN	TPR	8.07925	2.8424	0.260245	0.938839
sp|Q13428|TCOF_HUMAN	TCOF_HUMAN	TCOF1	7.62217	2.76083	0.259916	0.487457
sp|Q99623|PHB2_HUMAN	PHB2_HUMAN	PHB2	2.50001	1.58114	0.259297	1.15538
sp|Q9NWB6|ARGL1_HUMAN	ARGL1_HUMAN	#N/A	#N/A	#N/A	0.25895	1.15885
sp|Q9Y6R0|NUMBL_HUMAN	NUMBL_HUMAN	NUMBL	0	0	0.258851	0.81383
sp|Q9NTJ3|SMC4_HUMAN	SMC4_HUMAN	SMC4	3.88175	1.97021	0.257797	-1.38908
sp|O95202|LETM1_HUMAN	LETM1_HUMAN	LETM1	6.52904	2.5552	0.256926	-1.20573
sp|Q9NXE4|NSMA3_HUMAN	NSMA3_HUMAN	SMPD4	0	0	0.255817	0.547128
sp|Q99755|PI51A_HUMAN	PI51A_HUMAN	PIP5K1A	1.5213	1.23341	0.25533	0.978845
sp|Q8IV50|LYSM2_HUMAN	LYSM2_HUMAN	#N/A	#N/A	#N/A	0.253697	0.611596
sp|P84098|RL19_HUMAN	RL19_HUMAN	RPL19	3.85866	1.96435	0.248279	0.344637
sp|Q9NZ01|TECR_HUMAN	TECR_HUMAN	TECR	1.25227	1.11905	0.24778	-1.12422
sp|Q9Y385|UB2J1_HUMAN	UB2J1_HUMAN	UBE2J1	9.48779	3.08023	0.247431	-0.904923
sp|P23588|IF4B_HUMAN	IF4B_HUMAN	EIF4B	2.8902	1.70006	0.247002	-0.878485
sp|O95373|IPO7_HUMAN	IPO7_HUMAN	IPO7	4.41682	2.10162	0.246726	1.16355
sp|P55196|AFAD_HUMAN	AFAD_HUMAN	#N/A	#N/A	#N/A	0.245413	-1.16867
sp|P09543|CN37_HUMAN	CN37_HUMAN	#N/A	#N/A	#N/A	0.241569	-0.61005
sp|Q9BR76|COR1B_HUMAN	COR1B_HUMAN	#N/A	#N/A	#N/A	0.239952	0.772754
sp|Q9Y3L5|RAP2C_HUMAN	RAP2C_HUMAN	RAP2C	0	0	0.239655	0.779491
sp|P11171|41_HUMAN	41_HUMAN	#N/A	#N/A	#N/A	0.23841	-1.05803
sp|Q07812|BAX_HUMAN	BAX_HUMAN	#N/A	#N/A	#N/A	0.237934	1.02623
sp|O43592|XPOT_HUMAN	XPOT_HUMAN	XPOT	0	0	0.236731	-0.680449
sp|P17066|HSP76_HUMAN	HSP76_HUMAN	HSPA6	0	0	0.235806	-0.633015
sp|Q15208|STK38_HUMAN	STK38_HUMAN	STK38	3.55376	1.88514	0.23395	0.81575
sp|P50747|BPL1_HUMAN	BPL1_HUMAN	#N/A	#N/A	#N/A	0.231955	0.878268
sp|P30048|PRDX3_HUMAN	PRDX3_HUMAN	PRDX3	4.03159	2.00788	0.231824	-0.741875
sp|P46781|RS9_HUMAN	RS9_HUMAN	RPS9	2.99429	1.7304	0.230599	0.882267
sp|P06733|ENOA_HUMAN	ENOA_HUMAN	ENO1	3.96464	1.99114	0.227746	0.841697
sp|O00151|PDLI1_HUMAN	PDLI1_HUMAN	PDLIM1	1.59593	1.2633	0.225437	0.805679
sp|P08240|SRPRA_HUMAN	SRPRA_HUMAN	SRPRA	5.747	2.39729	0.220662	0.938946
sp|Q9Y5X1|SNX9_HUMAN	SNX9_HUMAN	SNX9	1.64894	1.28411	0.219655	0.882863
sp|P05141|ADT2_HUMAN	ADT2_HUMAN	#N/A	#N/A	#N/A	0.219642	-0.352228
sp|Q9Y4P8|WIPI2_HUMAN	WIPI2_HUMAN	WIPI2	1.39665	1.1818	0.219189	-0.900985
sp|P35268|RL22_HUMAN	RL22_HUMAN	RPL22	1.04068	1.02014	0.216523	0.875444
sp|Q9UMY1|NOL7_HUMAN	NOL7_HUMAN	NOL7	0	0	0.215613	0.489235
sp|Q15084|PDIA6_HUMAN	PDIA6_HUMAN	PDIA6	7.02309	2.65011	0.213173	0.391681
sp|Q07820|MCL1_HUMAN	MCL1_HUMAN	MCL1	1.8655	1.36583	0.212958	-0.649984
sp|Q8NE71|ABCF1_HUMAN	ABCF1_HUMAN	#N/A	#N/A	#N/A	0.212718	-0.667055
sp|Q15366|PCBP2_HUMAN	PCBP2_HUMAN	PCBP2	2.2705	1.50682	0.211823	0.55976
sp|Q14839|CHD4_HUMAN	CHD4_HUMAN	#N/A	#N/A	#N/A	0.207967	1.01389
sp|P25398|RS12_HUMAN	RS12_HUMAN	RPS12	2.82631	1.68116	0.20657	0.68927
sp|Q15388|TOM20_HUMAN	TOM20_HUMAN	TOMM20	1.03644	1.01806	0.20391	0.824838
sp|P49757|NUMB_HUMAN	NUMB_HUMAN	NUMB	3.40615	1.84557	0.201495	0.833677
sp|Q9NZZ3|CHMP5_HUMAN	CHMP5_HUMAN	#N/A	#N/A	#N/A	0.199474	0.625035
sp|Q96A49|SYAP1_HUMAN	SYAP1_HUMAN	SYAP1	1.59295	1.26212	0.197769	0.668885
sp|P07737|PROF1_HUMAN	PROF1_HUMAN	PFN1	2.27262	1.50752	0.197768	0.777676
sp|P49327|FAS_HUMAN	FAS_HUMAN	FASN	10.3193	3.21236	0.19741	0.436024
sp|Q99615|DNJC7_HUMAN	DNJC7_HUMAN	DNAJC7	5.69936	2.38733	0.197379	0.755463
sp|O14617|AP3D1_HUMAN	AP3D1_HUMAN	#N/A	#N/A	#N/A	0.194055	0.355348
sp|Q6PCB5|RSBNL_HUMAN	RSBNL_HUMAN	RSBN1L	4.39411	2.09621	0.192303	0.721989
sp|Q9P031|TAP26_HUMAN	TAP26_HUMAN	CCDC59	0.893199	0.945092	0.190967	-0.917619
sp|Q99879|H2B1M_HUMAN;sp|Q99880|H2B1L_HUMAN;sp|Q99877|H2B1N_HUMAN;sp|Q93079|H2B1H_HUMAN;sp|Q5QNW6|H2B2F_HUMAN;sp|P62807|H2B1C_HUMAN;sp|P58876|H2B1D_HUMAN;sp|P57053|H2BFS_HUMAN;sp|O60814|H2B1K_HUMAN	H2B1M_HUMAN	#N/A	#N/A	#N/A	0.187978	0.735131
sp|Q9BRS2|RIOK1_HUMAN	RIOK1_HUMAN	RIOK1	4.26124	2.06428	0.187718	-0.507492
sp|Q9HCL2|GPAT1_HUMAN	GPAT1_HUMAN	GPAM	0.960887	0.980248	0.187435	-0.776903
sp|Q8N5K1|CISD2_HUMAN	CISD2_HUMAN	#N/A	#N/A	#N/A	0.185145	-0.731878
sp|P13639|EF2_HUMAN	EF2_HUMAN	EEF2	4.10891	2.02704	0.181254	0.449573
sp|Q96CS3|FAF2_HUMAN	FAF2_HUMAN	FAF2	1.45729	1.20718	0.179432	0.627615
sp|Q99961|SH3G1_HUMAN	SH3G1_HUMAN	SH3GL1	0	0	0.177783	0.546599
sp|Q6P2Q9|PRP8_HUMAN	PRP8_HUMAN	PRPF8	0.997906	0.998952	0.173398	0.657032
sp|Q13823|NOG2_HUMAN	NOG2_HUMAN	GNL2	1.85915	1.3635	0.171683	0.767038
sp|Q14008|CKAP5_HUMAN	CKAP5_HUMAN	#N/A	#N/A	#N/A	0.171371	-1.02327
sp|P55010|IF5_HUMAN	IF5_HUMAN	EIF5	3.85984	1.96465	0.170352	0.679221
sp|P11142|HSP7C_HUMAN	HSP7C_HUMAN	HSPA8	4.88932	2.21118	0.16894	-0.646154
sp|P07437|TBB5_HUMAN	TBB5_HUMAN	TUBB	6.4425	2.53821	0.167996	-0.40285
sp|P06576|ATPB_HUMAN	ATPB_HUMAN	#N/A	#N/A	#N/A	0.1651	0.52819
sp|P08238|HS90B_HUMAN	HS90B_HUMAN	HSP90AB1	6.77737	2.60334	0.164526	0.371887
sp|Q96RQ3|MCCA_HUMAN	MCCA_HUMAN	MCCC1	6.03411	2.45644	0.164277	-0.687751
sp|P23528|COF1_HUMAN	COF1_HUMAN	#N/A	#N/A	#N/A	0.1638	-0.572423
sp|P49411|EFTU_HUMAN	EFTU_HUMAN	TUFM	3.31319	1.82022	0.162422	0.509862
sp|Q9H3P7|GCP60_HUMAN	GCP60_HUMAN	ACBD3	3.18508	1.78468	0.159832	0.746227
sp|Q9UQN3|CHM2B_HUMAN	CHM2B_HUMAN	#N/A	#N/A	#N/A	0.159799	0.644984
sp|O00429|DNM1L_HUMAN	DNM1L_HUMAN	DNM1L	6.56811	2.56283	0.157434	0.415829
sp|P16401|H15_HUMAN	H15_HUMAN	HIST1H1B	2.59409	1.61062	0.156713	0.612076
sp|Q8N6R0|MET13_HUMAN	MET13_HUMAN	METTL13	1.08449	1.04139	0.155619	0.433096
sp|Q14C86|GAPD1_HUMAN	GAPD1_HUMAN	GAPVD1	5.15217	2.26984	0.153484	-0.933986
sp|O14980|XPO1_HUMAN	XPO1_HUMAN	XPO1	0.893602	0.945305	0.152435	0.490216
sp|P61513|RL37A_HUMAN	RL37A_HUMAN	RPL37A	2.26074	1.50358	0.151975	0.467655
sp|Q12830|BPTF_HUMAN	BPTF_HUMAN	#N/A	#N/A	#N/A	0.151311	-0.591559
sp|Q9UNX4|WDR3_HUMAN	WDR3_HUMAN	WDR3	2.11766	1.45522	0.150651	0.466473
sp|Q14331|FRG1_HUMAN	FRG1_HUMAN	FRG1	1.26342	1.12402	0.146636	-0.57792
sp|Q15637|SF01_HUMAN	SF01_HUMAN	SF1	0	0	0.144363	0.366112
sp|O15126|SCAM1_HUMAN	SCAM1_HUMAN	SCAMP1	10.587	3.25377	0.144304	0.567966
sp|Q96HC4|PDLI5_HUMAN	PDLI5_HUMAN	PDLIM5	2.068	1.43805	0.143665	0.601217
sp|P55209|NP1L1_HUMAN	NP1L1_HUMAN	NAP1L1	1.54661	1.24363	0.143424	-0.563609
sp|P32780|TF2H1_HUMAN	TF2H1_HUMAN	GTF2H1	1.3326	1.15438	0.142663	-0.37876
sp|Q7Z6K5|ARPIN_HUMAN	ARPIN_HUMAN	#N/A	#N/A	#N/A	0.142063	0.662117
sp|Q9Y2Z0|SGT1_HUMAN	SGT1_HUMAN	SUGT1	3.62389	1.90365	0.141785	0.570236
sp|P18206|VINC_HUMAN	VINC_HUMAN	VCL	1.81572	1.34749	0.13815	0.735484
sp|P18031|PTN1_HUMAN	PTN1_HUMAN	PTPN1	3.8931	1.97309	0.138028	-0.255128
sp|Q4KMP7|TB10B_HUMAN	TB10B_HUMAN	TBC1D10B	0	0	0.136498	0.529816
sp|P42766|RL35_HUMAN	RL35_HUMAN	RPL35	3.83638	1.95867	0.136232	0.221
sp|Q9H8Y8|GORS2_HUMAN	GORS2_HUMAN	GORASP2	2.79271	1.67114	0.135148	-0.586995
sp|O75534|CSDE1_HUMAN	CSDE1_HUMAN	#N/A	#N/A	#N/A	0.134719	-0.739053
sp|P63244|RACK1_HUMAN	RACK1_HUMAN	RACK1	2.41084	1.55269	0.133154	-0.591815
sp|O15235|RT12_HUMAN	RT12_HUMAN	MRPS12	0	0	0.133063	-0.601683
sp|Q969Q0|RL36L_HUMAN	RL36L_HUMAN	RPL36AL	5.68368	2.38405	0.131933	0.619287
sp|Q9Y5K6|CD2AP_HUMAN	CD2AP_HUMAN	#N/A	#N/A	#N/A	0.131494	0.624633
sp|Q13642|FHL1_HUMAN	FHL1_HUMAN	FHL1	0	0	0.13112	-0.479947
sp|O95721|SNP29_HUMAN	SNP29_HUMAN	SNAP29	2.90561	1.70458	0.131074	-0.488963
sp|Q9P258|RCC2_HUMAN	RCC2_HUMAN	RCC2	18.3131	4.27939	0.13088	0.371654
sp|Q8TDD1|DDX54_HUMAN	DDX54_HUMAN	#N/A	#N/A	#N/A	0.125913	-0.784926
sp|Q9Y490|TLN1_HUMAN	TLN1_HUMAN	TLN1	5.23893	2.28887	0.117423	0.588536
sp|Q9P0L0|VAPA_HUMAN	VAPA_HUMAN	VAPA	10.7143	3.27327	0.116776	0.508893
sp|P12236|ADT3_HUMAN	ADT3_HUMAN	#N/A	#N/A	#N/A	0.114653	0.414924
sp|P62249|RS16_HUMAN	RS16_HUMAN	RPS16	4.22351	2.05512	0.114216	-0.199902
sp|O94826|TOM70_HUMAN	TOM70_HUMAN	TOMM70	3.98815	1.99704	0.113582	0.377459
sp|P61026|RAB10_HUMAN	RAB10_HUMAN	RAB10	2.32121	1.52355	0.113306	-0.648187
sp|O75691|UTP20_HUMAN	UTP20_HUMAN	UTP20	4.45477	2.11063	0.111187	-0.538111
sp|Q96S99|PKHF1_HUMAN	PKHF1_HUMAN	PLEKHF1	0	0	0.109098	0.345346
sp|Q8WUX9|CHMP7_HUMAN	CHMP7_HUMAN	#N/A	#N/A	#N/A	0.108256	0.343231
sp|P51003|PAPOA_HUMAN	PAPOA_HUMAN	PAPOLA	1.31843	1.14823	0.105668	0.306916
sp|Q15365|PCBP1_HUMAN	PCBP1_HUMAN	PCBP1	2.5504	1.597	0.103792	0.203049
sp|Q9Y5A9|YTHD2_HUMAN	YTHD2_HUMAN	YTHDF2	9.33516	3.05535	0.102261	0.333564
sp|Q93008|USP9X_HUMAN	USP9X_HUMAN	USP9X	0	0	0.101712	0.326937
sp|P62277|RS13_HUMAN	RS13_HUMAN	RPS13	2.01519	1.41957	0.10002	0.443081
sp|Q8TAT6|NPL4_HUMAN	NPL4_HUMAN	NPLOC4	5.2324	2.28744	0.098732	0.434953
sp|P54578|UBP14_HUMAN	UBP14_HUMAN	USP14	20.4724	4.52465	0.095386	-0.283719
sp|P21333|FLNA_HUMAN	FLNA_HUMAN	FLNA	13.0349	3.61039	0.0945193	0.361203
sp|Q96LT7|CI072_HUMAN	CI072_HUMAN	#N/A	#N/A	#N/A	0.0907856	-0.214533
sp|P55036|PSMD4_HUMAN	PSMD4_HUMAN	PSMD4	2.23879	1.49626	0.0907613	-0.513952
sp|Q6ZUT1|CK057_HUMAN	CK057_HUMAN	#N/A	#N/A	#N/A	0.0903747	0.26534
sp|Q9UEY8|ADDG_HUMAN	ADDG_HUMAN	#N/A	#N/A	#N/A	0.0900827	0.355261
sp|Q9Y2R4|DDX52_HUMAN	DDX52_HUMAN	#N/A	#N/A	#N/A	0.0898534	0.306315
sp|P62753|RS6_HUMAN	RS6_HUMAN	RPS6	5.7648	2.401	0.0883399	-0.143057
sp|O00410|IPO5_HUMAN	IPO5_HUMAN	IPO5	0.719816	0.848419	0.0882073	0.309621
sp|Q9Y266|NUDC_HUMAN	NUDC_HUMAN	NUDC	3.17672	1.78234	0.0863068	-0.239558
sp|Q16543|CDC37_HUMAN	CDC37_HUMAN	#N/A	#N/A	#N/A	0.0845343	0.251711
sp|Q8TEQ6|GEMI5_HUMAN	GEMI5_HUMAN	GEMIN5	6.2695	2.5039	0.0843769	-0.492782
sp|Q969Z3|MARC2_HUMAN	MARC2_HUMAN	MARC2	3.16108	1.77794	0.0838321	-0.261647
sp|P11387|TOP1_HUMAN	TOP1_HUMAN	TOP1	2.2439	1.49797	0.0825849	-0.372993
sp|Q7Z478|DHX29_HUMAN	DHX29_HUMAN	#N/A	#N/A	#N/A	0.0817244	-0.418188
sp|Q9Y3U8|RL36_HUMAN	RL36_HUMAN	RPL36	3.32164	1.82254	0.081709	0.28326
sp|P62805|H4_HUMAN	H4_HUMAN	HIST1H4A	25.03	5.003	0.0728081	-0.33124
sp|P62910|RL32_HUMAN	RL32_HUMAN	RPL32	2.82336	1.68028	0.0726318	0.260341
sp|P31948|STIP1_HUMAN	STIP1_HUMAN	STIP1	4.39001	2.09523	0.0719815	0.408129
sp|P46109|CRKL_HUMAN	CRKL_HUMAN	#N/A	#N/A	#N/A	0.0717909	-0.246089
sp|Q5UIP0|RIF1_HUMAN	RIF1_HUMAN	RIF1	1.25335	1.11953	0.0703123	-0.206092
sp|P05165|PCCA_HUMAN	PCCA_HUMAN	PCCA	12.8276	3.58156	0.0682337	0.479983
sp|Q6FI81|CPIN1_HUMAN	CPIN1_HUMAN	#N/A	#N/A	#N/A	0.0679113	-0.237639
sp|P32121|ARRB2_HUMAN	ARRB2_HUMAN	#N/A	#N/A	#N/A	0.0672926	0.283617
sp|Q9BWH2|FUND2_HUMAN	FUND2_HUMAN	FUNDC2	2.38658	1.54486	0.067117	0.194157
sp|Q9Y217|MTMR6_HUMAN	MTMR6_HUMAN	MTMR6	0	0	0.0665293	-0.178001
sp|O95248|MTMR5_HUMAN	MTMR5_HUMAN	SBF1	2.18145	1.47697	0.0663798	0.366567
sp|P20339|RAB5A_HUMAN	RAB5A_HUMAN	RAB5A	0	0	0.0645929	0.481602
sp|Q14157|UBP2L_HUMAN	UBP2L_HUMAN	UBAP2L	2.31185	1.52048	0.0624379	0.3272
sp|Q9NRY5|F1142_HUMAN	F1142_HUMAN	FAM114A2	7.64265	2.76453	0.0620055	0.282746
sp|Q9BQG0|MBB1A_HUMAN	MBB1A_HUMAN	MYBBP1A	7.84055	2.8001	0.0592625	0.12385
sp|P49207|RL34_HUMAN	RL34_HUMAN	RPL34	2.54726	1.59601	0.0587103	-0.139394
sp|Q9NZM3|ITSN2_HUMAN	ITSN2_HUMAN	ITSN2	0	0	0.0573299	0.187316
sp|P62258|1433E_HUMAN	1433E_HUMAN	#N/A	#N/A	#N/A	0.055906	0.194494
sp|Q9Y678|COPG1_HUMAN	COPG1_HUMAN	#N/A	#N/A	#N/A	0.0534673	0.167556
sp|P49458|SRP09_HUMAN	SRP09_HUMAN	SRP9	0	0	0.0532846	0.16225
sp|Q9UH62|ARMX3_HUMAN	ARMX3_HUMAN	#N/A	#N/A	#N/A	0.0508475	-0.286176
sp|Q96GA3|LTV1_HUMAN	LTV1_HUMAN	LTV1	1.75752	1.32572	0.0507586	-0.252145
sp|P16333|NCK1_HUMAN	NCK1_HUMAN	NCK1	0	0	0.048653	0.185503
sp|O75431|MTX2_HUMAN	MTX2_HUMAN	MTX2	0	0	0.0465955	0.152575
sp|Q9HB71|CYBP_HUMAN	CYBP_HUMAN	#N/A	#N/A	#N/A	0.04587	0.220886
sp|P26374|RAE2_HUMAN	RAE2_HUMAN	CHML	0	0	0.0457603	-0.222817
sp|Q9Y450|HBS1L_HUMAN	HBS1L_HUMAN	HBS1L	2.38673	1.5449	0.0447586	-0.191404
sp|Q14980|NUMA1_HUMAN	NUMA1_HUMAN	NUMA1	5.73343	2.39446	0.044004	-0.259375
sp|P68371|TBB4B_HUMAN	TBB4B_HUMAN	TUBB4B	6.68198	2.58495	0.0433156	-0.108162
sp|P78371|TCPB_HUMAN	TCPB_HUMAN	CCT2	2.32774	1.52569	0.0426207	0.21866
sp|Q9UBP9|GULP1_HUMAN	GULP1_HUMAN	GULP1	1.98007	1.40715	0.0412149	-0.161356
sp|P50502|F10A1_HUMAN;sp|Q8NFI4|F10A5_HUMAN;sp|Q8IZP2|ST134_HUMAN	F10A1_HUMAN	ST13	0.961065	0.980339	0.0391151	0.176055
sp|Q86TP1|PRUNE_HUMAN	PRUNE_HUMAN	PRUNE1	35.8438	5.98697	0.0379619	0.093221
sp|Q8IYB3|SRRM1_HUMAN	SRRM1_HUMAN	SRRM1	5.56578	2.35919	0.0355155	-0.194141
sp|P35579|MYH9_HUMAN	MYH9_HUMAN	MYH9	5.79408	2.40709	0.0335233	0.177627
sp|Q5JRA6|MIA3_HUMAN	MIA3_HUMAN	MIA3	0.952021	0.975716	0.0326659	0.168821
sp|P21127|CD11B_HUMAN;sp|Q9UQ88|CD11A_HUMAN	CD11B_HUMAN	#N/A	#N/A	#N/A	0.0321592	0.117127
sp|O75976|CBPD_HUMAN	CBPD_HUMAN	#N/A	#N/A	#N/A	0.0308945	0.169292
sp|Q99653|CHP1_HUMAN	CHP1_HUMAN	#N/A	#N/A	#N/A	0.0306514	0.0567312
sp|O94906|PRP6_HUMAN	PRP6_HUMAN	PRPF6	3.04775	1.74578	0.0297878	-0.16909
sp|Q02040|AK17A_HUMAN	AK17A_HUMAN	#N/A	#N/A	#N/A	0.0294307	-0.163048
sp|O75663|TIPRL_HUMAN	TIPRL_HUMAN	TIPRL	3.04385	1.74466	0.0293695	0.127086
sp|Q66PJ3|AR6P4_HUMAN	AR6P4_HUMAN	#N/A	#N/A	#N/A	0.0292253	0.144926
sp|Q9Y2X3|NOP58_HUMAN	NOP58_HUMAN	NOP58	3.75189	1.93698	0.024136	0.0946909
sp|Q9HCU5|PREB_HUMAN	PREB_HUMAN	PREB	2.71641	1.64815	0.0237801	0.100837
sp|P23284|PPIB_HUMAN	PPIB_HUMAN	PPIB	0	0	0.0237265	0.077672
sp|Q96P47|AGAP3_HUMAN	AGAP3_HUMAN	#N/A	#N/A	#N/A	0.0195974	0.0777276
sp|P50991|TCPD_HUMAN	TCPD_HUMAN	CCT4	2.39786	1.5485	0.0192968	0.0517182
sp|P40227|TCPZ_HUMAN	TCPZ_HUMAN	CCT6A	0	0	0.018015	0.0671421
sp|Q9BPX6|MICU1_HUMAN	MICU1_HUMAN	MICU1	2.18161	1.47703	0.0153577	0.0526761
sp|P07814|SYEP_HUMAN	SYEP_HUMAN	EPRS	6.39292	2.52842	0.0143234	0.0753421
sp|Q96EX3|WDR34_HUMAN	WDR34_HUMAN	WDR34	2.13063	1.45967	0.0140165	-0.0411103
sp|Q5T8D3|ACBD5_HUMAN	ACBD5_HUMAN	#N/A	#N/A	#N/A	0.0137514	0.0650025
sp|Q13371|PHLP_HUMAN	PHLP_HUMAN	PDCL	3.29148	1.81424	0.0129415	-0.0697189
sp|Q9NX40|OCAD1_HUMAN	OCAD1_HUMAN	OCIAD1	2.3026	1.51743	0.01286	0.0458509
sp|O14654|IRS4_HUMAN	IRS4_HUMAN	IRS4	5.43536	2.33139	0.0122379	-0.0860252
sp|Q92572|AP3S1_HUMAN	AP3S1_HUMAN	#N/A	#N/A	#N/A	0.012001	-0.0261402
sp|P43487|RANG_HUMAN	RANG_HUMAN	RANBP1	3.77979	1.94417	0.0119746	-0.0698018
sp|Q14241|ELOA1_HUMAN	ELOA1_HUMAN	ELOA	0.938521	0.968773	0.0116022	0.0676621
sp|Q5VT25|MRCKA_HUMAN	MRCKA_HUMAN	CDC42BPA	0	0	0.00946396	0.050926
sp|P81605|DCD_HUMAN	DCD_HUMAN	#N/A	#N/A	#N/A	0.00874782	-0.0399304
sp|O96011|PX11B_HUMAN	PX11B_HUMAN	PEX11B	2.23195	1.49397	0.00772779	-0.0322524
sp|Q8NI27|THOC2_HUMAN	THOC2_HUMAN	THOC2	6.66774	2.5822	0.0066588	-0.0327899
sp|O95573|ACSL3_HUMAN	ACSL3_HUMAN	#N/A	#N/A	#N/A	0.00635718	0.0329642
sp|Q9H7Z3|NRDE2_HUMAN	NRDE2_HUMAN	NRDE2	4.9213	2.2184	0.00538174	-0.0266574
sp|Q14498|RBM39_HUMAN	RBM39_HUMAN	RBM39	2.65236	1.62861	0.0053204	0.0151345
sp|Q14677|EPN4_HUMAN	EPN4_HUMAN	CLINT1	2.90117	1.70328	0.00453739	-0.0237835
sp|Q9HDC5|JPH1_HUMAN	JPH1_HUMAN	JPH1	3.92945	1.98228	0.0041521	0.0146249
sp|O75190|DNJB6_HUMAN	DNJB6_HUMAN	#N/A	#N/A	#N/A	0.00180943	0.00664728
sp|P49959|MRE11_HUMAN	MRE11_HUMAN	MRE11	3.65245	1.91114	0.00114513	-0.00424955
sp|Q6PML9|ZNT9_HUMAN	ZNT9_HUMAN	SLC30A9	4.04649	2.01159	0.000981008	-0.00599569
sp|P18124|RL7_HUMAN	RL7_HUMAN	RPL7	2.41995	1.55562	0.000433653	-0.00134799

## Sheet: Rab2 QL
Majority protein IDs	Uniprot	Gene NAME	WD score	Root WD score	Log Student's T-test p-value Rab2QL	Student's T-test Difference Rab2 QL
sp|Q96T51|RUFY1_HUMAN	RUFY1_HUMAN	RUFY1	215.976	14.6961	23.7729	10.0699
sp|Q92538|GBF1_HUMAN	GBF1_HUMAN	GBF1	1011.64	31.8063	25.3458	9.32588
sp|Q7Z3E2|CC186_HUMAN	CC186_HUMAN	CCDC186	11120.2	105.452	21.8822	9.08132
sp|Q9BZH6|WDR11_HUMAN	WDR11_HUMAN	WDR11	993.628	31.5219	21.1601	9.18733
sp|Q8TD16|BICD2_HUMAN	BICD2_HUMAN	BICD2	171.633	13.1009	18.3998	9.40414
sp|Q96CN9|GCC1_HUMAN	GCC1_HUMAN	GCC1	620.603	24.9119	19.928	7.8211
sp|P00966|ASSY_HUMAN	ASSY_HUMAN	ASS1	6048.89	77.7746	15.6373	8.79252
sp|Q5TH69|BIG3_HUMAN	BIG3_HUMAN	ARFGEF3	17877.5	133.707	20.0699	7.43603
sp|P61019|RAB2A_HUMAN	RAB2A_HUMAN	RAB2A	9568.54	97.8189	7.62111	14.4676
sp|Q15075|EEA1_HUMAN	EEA1_HUMAN	EEA1	2437.38	49.3699	17.9433	6.3864
sp|Q96G01|BICD1_HUMAN	BICD1_HUMAN	BICD1	450.512	21.2253	17.4123	6.09631
sp|Q8WTW3|COG1_HUMAN	COG1_HUMAN	COG1	3913.5	62.558	14.0239	6.33073
sp|Q2M1P5|KIF7_HUMAN	KIF7_HUMAN	KIF7	197.071	14.0382	10.744	7.43562
sp|Q6IQ26|DEN5A_HUMAN	DEN5A_HUMAN	DENND5A	1278.91	35.7618	17.2676	5.5799
sp|Q9BV73|CP250_HUMAN	CP250_HUMAN	CEP250	226.588	15.0528	12.3451	6.47044
sp|Q9UPU7|TBD2B_HUMAN	TBD2B_HUMAN	TBC1D2B	36.2179	6.01813	9.12935	7.40271
sp|O43572|AKA10_HUMAN	AKA10_HUMAN	AKAP10	182.425	13.5065	13.2887	5.821
sp|Q9NRY5|F1142_HUMAN	F1142_HUMAN	FAM114A2	116.775	10.8063	7.41791	8.66129
sp|Q8TEQ0|SNX29_HUMAN	SNX29_HUMAN	SNX29	6720.33	81.9776	12.5279	5.59131
sp|Q96LT7|CI072_HUMAN	CI072_HUMAN	C9orf72	247.83	15.7426	10.5532	5.86593
sp|P82094|TMF1_HUMAN	TMF1_HUMAN	TMF1	31.5639	5.61818	6.43916	8.41187
sp|Q8WXA3|RUFY2_HUMAN	RUFY2_HUMAN	RUFY2	5073.58	71.2291	12.2714	5.20914
sp|Q66K14|TBC9B_HUMAN	TBC9B_HUMAN	TBC1D9B	406.038	20.1504	12.7365	5.03966
sp|O60763|USO1_HUMAN	USO1_HUMAN	USO1	109.28	10.4537	9.27661	5.90091
sp|Q9Y2H2|SAC2_HUMAN	SAC2_HUMAN	INPP5F	42.2246	6.49804	7.18841	7.02712
sp|O14777|NDC80_HUMAN	NDC80_HUMAN	NDC80	5666.68	75.2774	11.4777	5.03794
sp|Q3MII6|TBC25_HUMAN	TBC25_HUMAN	TBC1D25	2183.66	46.7296	6.99608	6.06179
sp|Q9NRD5|PICK1_HUMAN	PICK1_HUMAN	PICK1	6028.7	77.6447	12.6365	4.43846
sp|Q8N137|CNTRB_HUMAN	CNTRB_HUMAN	CNTROB	730.351	27.025	10.2806	4.72875
sp|Q9H2G9|GO45_HUMAN	GO45_HUMAN	BLZF1	505.227	22.4773	9.59374	4.63164
sp|Q9HAS0|NJMU_HUMAN	NJMU_HUMAN	C17orf75	725.132	26.9283	9.53164	4.61677
sp|Q8IWJ2|GCC2_HUMAN	GCC2_HUMAN	GCC2	50.6925	7.11987	4.1251	8.82194
sp|Q8NB25|F184A_HUMAN	F184A_HUMAN	FAM184A	128.04	11.3155	7.91408	4.73931
sp|Q8NBF6|AVL9_HUMAN	AVL9_HUMAN	AVL9	279.193	16.7091	8.69805	4.38845
sp|Q08379|GOGA2_HUMAN	GOGA2_HUMAN	GOLGA2	21.9394	4.68395	5.07013	5.91313
sp|Q6UVJ0|SAS6_HUMAN	SAS6_HUMAN	SASS6	98.5954	9.92952	9.40966	4.07511
sp|Q658Y4|F91A1_HUMAN	F91A1_HUMAN	FAM91A1	19.7586	4.44507	4.00625	6.84509
sp|P57768|SNX16_HUMAN	SNX16_HUMAN	SNX16	608.06	24.6589	8.39999	3.8881
sp|Q8WXW3|PIBF1_HUMAN	PIBF1_HUMAN	PIBF1	262.855	16.2128	5.50723	4.58607
sp|Q15042|RB3GP_HUMAN	RB3GP_HUMAN	RAB3GAP1	29.1516	5.39922	3.2705	6.15504
sp|P32019|I5P2_HUMAN	I5P2_HUMAN	INPP5B	113.546	10.6558	7.04669	3.58429
sp|Q9P1Q0|VPS54_HUMAN	VPS54_HUMAN	VPS54	190.953	13.8186	6.32689	3.72299
sp|Q05084|ICA69_HUMAN	ICA69_HUMAN	ICA1	8828.33	93.9592	7.23881	3.42346
sp|O15078|CE290_HUMAN	CE290_HUMAN	CEP290	224.88	14.996	5.8034	3.61891
sp|Q9UBF8|PI4KB_HUMAN	PI4KB_HUMAN	PI4KB	187.769	13.7029	4.24462	4.29183
sp|Q9P2D3|HTR5B_HUMAN	HTR5B_HUMAN	HEATR5B	351.766	18.7554	5.33868	3.6754
sp|Q9P2D6|F135A_HUMAN	F135A_HUMAN	FAM135A	167.315	12.935	3.49301	4.67409
sp|Q9HAD4|WDR41_HUMAN	WDR41_HUMAN	WDR41	16.5866	4.07267	3.12315	5.14645
sp|Q96FJ0|STALP_HUMAN	STALP_HUMAN	STAMBPL1	6028.7	77.6447	6.11002	3.24807
sp|Q5SQN1|SNP47_HUMAN	SNP47_HUMAN	SNAP47	75.8957	8.71181	3.4705	4.4099
sp|Q13439|GOGA4_HUMAN	GOGA4_HUMAN	GOLGA4	29.9801	5.47541	2.28587	6.38248
sp|Q01968|OCRL_HUMAN	OCRL_HUMAN	OCRL	12.1067	3.47947	2.85312	4.8543
sp|O75864|PPR37_HUMAN	PPR37_HUMAN	PPP1R37	8.56184	2.92606	5.77267	3.12535
sp|Q15643|TRIPB_HUMAN	TRIPB_HUMAN	TRIP11	21.5274	4.63976	2.38302	5.66352
sp|Q4V328|GRAP1_HUMAN	GRAP1_HUMAN	GRIPAP1	58.0558	7.61944	4.82371	3.21041
sp|Q8WUA4|TF3C2_HUMAN	TF3C2_HUMAN	GTF3C2	0	0	4.8056	3.19372
sp|Q9H0T7|RAB17_HUMAN	RAB17_HUMAN	#N/A	#N/A	#N/A	3.92537	3.29526
sp|Q9H2M9|RBGPR_HUMAN	RBGPR_HUMAN	RAB3GAP2	13.3287	3.65086	2.19661	5.05981
sp|Q5W0V3|F16B1_HUMAN	F16B1_HUMAN	FAM160B1	365.885	19.1281	4.49847	2.96488
sp|P26374|RAE2_HUMAN	RAE2_HUMAN	CHML	21.2848	4.61354	2.46946	4.29219
sp|Q8NAN2|MIGA1_HUMAN	MIGA1_HUMAN	MIGA1	7.15044	2.67403	1.74635	4.62107
sp|Q9Y6D5|BIG2_HUMAN	BIG2_HUMAN	ARFGEF2	43.1495	6.56883	4.11119	2.42454
sp|Q6ZUT9|DEN5B_HUMAN	DEN5B_HUMAN	DENND5B	78.509	8.86053	3.43012	2.60781
sp|Q8NF91|SYNE1_HUMAN	SYNE1_HUMAN	SYNE1	5.22322	2.28544	1.83336	3.77351
sp|Q8TEV9|SMCR8_HUMAN	SMCR8_HUMAN	SMCR8	7.9275	2.81558	1.61325	4.29475
sp|O94986|CE152_HUMAN	CE152_HUMAN	CEP152	468.206	21.6381	3.27577	2.49168
sp|Q7L099|RUFY3_HUMAN	RUFY3_HUMAN	RUFY3	10.1341	3.18341	3.66419	2.28568
sp|Q9NS87|KIF15_HUMAN	KIF15_HUMAN	KIF15	30.1002	5.48637	3.1052	2.38242
sp|Q8TBA6|GOGA5_HUMAN	GOGA5_HUMAN	GOLGA5	7.05895	2.65687	1.57497	3.71274
sp|Q5TZA2|CROCC_HUMAN	CROCC_HUMAN	CROCC	254.796	15.9623	2.21004	2.79874
sp|Q9H6J7|CK049_HUMAN	CK049_HUMAN	C11orf49	25.1672	5.01669	2.38378	2.61892
sp|Q8IUD2|RB6I2_HUMAN	RB6I2_HUMAN	ERC1	9.78309	3.12779	1.46629	3.90283
sp|P98170|XIAP_HUMAN	XIAP_HUMAN	XIAP	19.6942	4.43781	3.32013	2.22707
sp|P16403|H12_HUMAN	H12_HUMAN	HIST1H1C	47.3312	6.87977	1.39017	3.37824
sp|Q8IY31|IFT20_HUMAN	IFT20_HUMAN	#N/A	#N/A	#N/A	2.80136	2.02105
sp|Q15390|MTFR1_HUMAN	MTFR1_HUMAN	MTFR1	7.83828	2.79969	1.45434	2.97404
sp|P61927|RL37_HUMAN	RL37_HUMAN	RPL37	6.86496	2.62011	1.47859	2.79452
sp|P52732|KIF11_HUMAN	KIF11_HUMAN	KIF11	23.3573	4.83294	1.50776	2.68957
sp|Q9H4A6|GOLP3_HUMAN	GOLP3_HUMAN	GOLPH3	14.3288	3.78534	1.58842	2.53651
sp|Q6P3W7|SCYL2_HUMAN	SCYL2_HUMAN	SCYL2	5.18721	2.27754	1.22068	3.19339
sp|Q15036|SNX17_HUMAN	SNX17_HUMAN	SNX17	405.036	20.1255	2.75235	1.84284
sp|Q9H9E3|COG4_HUMAN	COG4_HUMAN	COG4	6.78291	2.6044	2.93473	1.79534
sp|Q96AG3|S2546_HUMAN	S2546_HUMAN	SLC25A46	11.5931	3.40486	1.4789	2.48067
sp|Q9UID3|VPS51_HUMAN	VPS51_HUMAN	VPS51	18.7312	4.32796	2.52637	1.72434
sp|Q3V6T2|GRDN_HUMAN	GRDN_HUMAN	CCDC88A	8.47849	2.91179	1.19734	2.65456
sp|Q8WU79|SMAP2_HUMAN	SMAP2_HUMAN	SMAP2	2.94437	1.71592	1.8813	1.93707
sp|Q9NQG6|MID51_HUMAN	MID51_HUMAN	MIEF1	9.7999	3.13048	1.20817	2.49133
sp|Q13464|ROCK1_HUMAN	ROCK1_HUMAN	ROCK1	27.2467	5.21984	1.21158	2.43986
sp|Q96A49|SYAP1_HUMAN	SYAP1_HUMAN	SYAP1	4.78072	2.18648	1.24158	2.3682
sp|Q9Y4E8|UBP15_HUMAN	UBP15_HUMAN	USP15	5.68952	2.38527	0.972545	2.97952
sp|Q5VT66|MARC1_HUMAN	MARC1_HUMAN	MARC1	4.87267	2.20741	1.28413	2.24895
sp|Q96CV9|OPTN_HUMAN	OPTN_HUMAN	OPTN	780.759	27.9421	2.68564	1.54812
sp|P11274|BCR_HUMAN	BCR_HUMAN	BCR	13.1438	3.62544	1.00314	2.68379
sp|P13861|KAP2_HUMAN	KAP2_HUMAN	PRKAR2A	4.68934	2.16549	1.09104	2.45897
sp|Q9NP61|ARFG3_HUMAN	ARFG3_HUMAN	ARFGAP3	9.56392	3.09256	1.35329	2.02756
sp|Q14318|FKBP8_HUMAN	FKBP8_HUMAN	FKBP8	3.85703	1.96393	1.56448	1.85443
sp|Q9NZQ3|SPN90_HUMAN	SPN90_HUMAN	NCKIPSD	15.4627	3.93227	2.32284	1.54826
sp|Q02224|CENPE_HUMAN	CENPE_HUMAN	CENPE	20.0228	4.47469	1.30949	2.03445
sp|Q16513|PKN2_HUMAN	PKN2_HUMAN	PKN2	10.2918	3.20808	0.990242	2.45222
sp|P33981|TTK_HUMAN	TTK_HUMAN	TTK	4.5794	2.13995	0.964418	2.49288
sp|Q8TBP0|TBC16_HUMAN	TBC16_HUMAN	TBC1D16	15.4627	3.93227	2.50034	1.44465
sp|Q16543|CDC37_HUMAN	CDC37_HUMAN	CDC37	19.1616	4.3774	1.30718	1.89994
sp|Q15025|TNIP1_HUMAN	TNIP1_HUMAN	#N/A	#N/A	#N/A	2.23923	1.4586
sp|Q5TAX3|TUT4_HUMAN	TUT4_HUMAN	TUT4	0	0	1.08268	2.10486
sp|Q9H425|CA198_HUMAN	CA198_HUMAN	C1orf198	3.35095	1.83056	1.60631	1.64178
sp|Q8IYB5|SMAP1_HUMAN	SMAP1_HUMAN	SMAP1	4.23219	2.05723	1.14402	1.99343
sp|O75410|TACC1_HUMAN	TACC1_HUMAN	TACC1	5.5972	2.36584	0.845773	2.57468
sp|O00429|DNM1L_HUMAN	DNM1L_HUMAN	DNM1L	9.59653	3.09783	1.3353	1.7411
sp|Q13371|PHLP_HUMAN	PHLP_HUMAN	PDCL	3.96811	1.99201	0.908837	2.30078
sp|Q9Y217|MTMR6_HUMAN	MTMR6_HUMAN	MTMR6	0	0	1.41209	1.65183
sp|Q8IXI1|MIRO2_HUMAN	MIRO2_HUMAN	RHOT2	4.26425	2.06501	0.912606	2.26006
sp|P50747|BPL1_HUMAN	BPL1_HUMAN	HLCS	6.41173	2.53214	0.98191	2.09654
sp|Q70CQ3|UBP30_HUMAN	UBP30_HUMAN	USP30	3.8446	1.96076	0.994824	2.06059
sp|O43933|PEX1_HUMAN	PEX1_HUMAN	PEX1	5.31105	2.30457	0.874863	2.32996
sp|Q9UBP9|GULP1_HUMAN	GULP1_HUMAN	GULP1	15.6828	3.96015	1.05855	1.89448
sp|O75962|TRIO_HUMAN	TRIO_HUMAN	TRIO	4.29422	2.07225	1.27392	1.66393
sp|Q9UH92|MLX_HUMAN	MLX_HUMAN	MLX	4.43657	2.10632	1.2967	1.63886
sp|Q9NZJ7|MTCH1_HUMAN	MTCH1_HUMAN	MTCH1	4.57931	2.13993	1.67151	1.41697
sp|Q8WUX9|CHMP7_HUMAN	CHMP7_HUMAN	CHMP7	7.25747	2.69397	1.14137	1.70681
sp|P51617|IRAK1_HUMAN	IRAK1_HUMAN	IRAK1	5.86369	2.42151	0.953947	1.92457
sp|Q13642|FHL1_HUMAN	FHL1_HUMAN	FHL1	1.44034	1.20014	0.901858	1.91869
sp|Q13325|IFIT5_HUMAN	IFIT5_HUMAN	IFIT5	2.92076	1.70902	0.951805	1.76171
sp|Q5THJ4|VP13D_HUMAN	VP13D_HUMAN	VPS13D	9.89602	3.14579	0.674441	2.52668
sp|P62424|RL7A_HUMAN	RL7A_HUMAN	RPL7A	3.20629	1.79061	0.921734	1.79515
sp|Q02878|RL6_HUMAN	RL6_HUMAN	RPL6	2.406	1.55113	0.826851	1.97019
sp|P48444|COPD_HUMAN	COPD_HUMAN	ARCN1	3.34322	1.82845	0.862085	1.89238
sp|Q14789|GOGB1_HUMAN	GOGB1_HUMAN	GOLGB1	15.8628	3.98281	0.712053	2.31447
sp|Q92574|TSC1_HUMAN	TSC1_HUMAN	TSC1	49.4795	7.03417	0.951564	1.70911
sp|Q9NQC7|CYLD_HUMAN	CYLD_HUMAN	CYLD	3.72068	1.92891	0.928431	1.73011
sp|Q9NR12|PDLI7_HUMAN	PDLI7_HUMAN	PDLIM7	3.62474	1.90388	1.2472	1.43786
sp|Q8TB36|GDAP1_HUMAN	GDAP1_HUMAN	GDAP1	0	0	1.10556	1.52748
sp|P50851|LRBA_HUMAN	LRBA_HUMAN	LRBA	8.82949	2.97145	0.667849	2.40306
sp|Q9UH62|ARMX3_HUMAN	ARMX3_HUMAN	ARMCX3	4.4188	2.10209	0.733144	2.11557
sp|Q9NPL8|TIDC1_HUMAN	TIDC1_HUMAN	TIMMDC1	0	0	1.13517	1.48719
sp|O60664|PLIN3_HUMAN	PLIN3_HUMAN	PLIN3	4.02563	2.0064	1.28319	1.3872
sp|Q16181|SEPT7_HUMAN	SEPT7_HUMAN	SEPTIN7	0	0	1.389	1.32288
sp|Q9NZZ3|CHMP5_HUMAN	CHMP5_HUMAN	CHMP5	1.8119	1.34607	0.863381	1.69677
sp|Q9H1K0|RBNS5_HUMAN	RBNS5_HUMAN	RBSN	3.81061	1.95208	1.06069	1.47229
sp|Q8TC07|TBC15_HUMAN	TBC15_HUMAN	TBC1D15	6.08906	2.4676	0.706488	2.03616
sp|P04181|OAT_HUMAN	OAT_HUMAN	OAT	0	0	1.26878	1.33365
sp|P18124|RL7_HUMAN	RL7_HUMAN	RPL7	2.41995	1.55562	0.982667	1.49956
sp|Q2KHT3|CL16A_HUMAN	CL16A_HUMAN	CLEC16A	7.23242	2.68932	0.967617	1.483
sp|Q6P444|MTFR2_HUMAN	MTFR2_HUMAN	MTFR2	3.97366	1.9934	0.868168	1.5506
sp|P51809|VAMP7_HUMAN	VAMP7_HUMAN	VAMP7	3.18244	1.78394	1.09559	1.34258
sp|Q8N2F6|ARM10_HUMAN	ARM10_HUMAN	ARMC10	3.23366	1.79824	0.74026	1.7441
sp|Q9H4L5|OSBL3_HUMAN	OSBL3_HUMAN	OSBPL3	3.14519	1.77347	0.680971	1.88187
sp|Q9UQN3|CHM2B_HUMAN	CHM2B_HUMAN	CHMP2B	1.97183	1.40422	0.706339	1.76651
sp|Q9Y2W6|TDRKH_HUMAN	TDRKH_HUMAN	TDRKH	5.20842	2.2822	1.2134	1.23044
sp|Q71RC2|LARP4_HUMAN	LARP4_HUMAN	LARP4	6.51631	2.55271	0.694804	1.74002
sp|Q96RL7|VP13A_HUMAN	VP13A_HUMAN	VPS13A	7.77382	2.78816	0.595135	2.06999
sp|Q7L804|RFIP2_HUMAN	RFIP2_HUMAN	RAB11FIP2	5.55081	2.35602	0.768534	1.58501
sp|Q96CS3|FAF2_HUMAN	FAF2_HUMAN	FAF2	3.40447	1.84512	0.752272	1.60476
sp|P18031|PTN1_HUMAN	PTN1_HUMAN	PTPN1	4.90122	2.21387	1.2729	1.17026
sp|Q86XI2|CNDG2_HUMAN	CNDG2_HUMAN	NCAPG2	2.41319	1.55345	1.06367	1.26861
sp|O95721|SNP29_HUMAN	SNP29_HUMAN	SNAP29	4.33636	2.08239	0.787399	1.52783
sp|O43175|SERA_HUMAN	SERA_HUMAN	PHGDH	1.54718	1.24386	0.743276	1.57264
sp|Q9H3P7|GCP60_HUMAN	GCP60_HUMAN	ACBD3	4.31044	2.07616	0.60665	1.85363
sp|Q9Y3L5|RAP2C_HUMAN	RAP2C_HUMAN	RAP2C	0	0	0.767501	1.47234
sp|Q9NWB6|ARGL1_HUMAN	ARGL1_HUMAN	ARGLU1	6.80204	2.60807	0.597975	1.8644
sp|Q9NS69|TOM22_HUMAN	TOM22_HUMAN	TOMM22	23.0006	4.79589	0.685573	1.59509
sp|P09651|ROA1_HUMAN;sp|Q32P51|RA1L2_HUMAN	ROA1_HUMAN	HNRNPA1	0	0	0.888926	1.31278
sp|O15235|RT12_HUMAN	RT12_HUMAN	MRPS12	0.791135	0.889458	0.618153	1.73983
sp|Q14677|EPN4_HUMAN	EPN4_HUMAN	CLINT1	4.19924	2.0492	0.614605	1.71934
sp|Q99996|AKAP9_HUMAN	AKAP9_HUMAN	AKAP9	21.6059	4.64822	0.534067	2.04607
sp|A1X283|SPD2B_HUMAN	SPD2B_HUMAN	SH3PXD2B	2.60327	1.61347	0.701754	1.50708
sp|Q15388|TOM20_HUMAN	TOM20_HUMAN	TOMM20	0	0	0.613612	1.70645
sp|Q9NX40|OCAD1_HUMAN	OCAD1_HUMAN	OCIAD1	4.02621	2.00654	0.742918	1.41567
sp|P52789|HXK2_HUMAN	HXK2_HUMAN	HK2	7.5832	2.75376	0.572089	1.81142
sp|Q9UEW8|STK39_HUMAN	STK39_HUMAN	STK39	0	0	1.06862	1.14105
sp|Q8N5F7|NKAP_HUMAN	NKAP_HUMAN	NKAP	2.47125	1.57202	0.656162	1.55355
sp|P16401|H15_HUMAN	H15_HUMAN	HIST1H1B	28.5058	5.33908	0.661513	1.52991
sp|Q15276|RABE1_HUMAN	RABE1_HUMAN	RABEP1	11.2888	3.35987	0.650161	1.51829
sp|Q3ZCQ8|TIM50_HUMAN	TIM50_HUMAN	TIMM50	6.6252	2.57395	0.659618	1.47003
sp|P49815|TSC2_HUMAN	TSC2_HUMAN	TSC2	0	0	0.840473	1.23238
sp|Q15572|TAF1C_HUMAN	TAF1C_HUMAN	TAF1C	0	0	1.40609	0.981042
sp|O94762|RECQ5_HUMAN	RECQ5_HUMAN	#N/A	#N/A	#N/A	0.524362	1.84789
sp|P22392|NDKB_HUMAN;sp|O60361|NDK8_HUMAN	NDKB_HUMAN	NME2	12.6783	3.56065	0.601018	1.5706
sp|Q9H019|MFR1L_HUMAN	MFR1L_HUMAN	MTFR1L	32.8822	5.7343	0.812105	1.23968
sp|Q9NXR1|NDE1_HUMAN	NDE1_HUMAN	NDE1	0	0	0.569376	1.63804
sp|Q96C19|EFHD2_HUMAN	EFHD2_HUMAN	EFHD2	2.93185	1.71227	0.598849	1.54189
sp|Q5T3I0|GPTC4_HUMAN	GPTC4_HUMAN	GPATCH4	4.56196	2.13587	0.68232	1.37193
sp|P18206|VINC_HUMAN	VINC_HUMAN	VCL	7.37197	2.71514	0.516031	1.82206
sp|Q6UB99|ANR11_HUMAN	ANR11_HUMAN	ANKRD11	8.5341	2.92132	0.499312	1.90188
sp|Q6PKG0|LARP1_HUMAN	LARP1_HUMAN	LARP1	4.52466	2.12713	0.517926	1.77188
sp|Q9Y2X3|NOP58_HUMAN	NOP58_HUMAN	NOP58	4.09398	2.02336	0.635231	1.3921
sp|P05388|RLA0_HUMAN;sp|Q8NHW5|RLA0L_HUMAN	RLA0_HUMAN	RPLP0	0	0	0.83063	1.12215
sp|Q8IWR0|Z3H7A_HUMAN	Z3H7A_HUMAN	ZC3H7A	1.86378	1.3652	0.818363	1.10441
sp|Q9UKK9|NUDT5_HUMAN	NUDT5_HUMAN	NUDT5	2.71241	1.64694	0.761392	1.14394
sp|Q08378|GOGA3_HUMAN	GOGA3_HUMAN	GOLGA3	11.6555	3.41401	0.619534	1.31622
sp|Q96MW1|CCD43_HUMAN	CCD43_HUMAN	CCDC43	0.820422	0.905772	0.552158	1.45904
sp|Q9NPG3|UBN1_HUMAN	UBN1_HUMAN	UBN1	11.0389	3.32248	0.890177	1.03731
sp|Q15431|SYCP1_HUMAN	SYCP1_HUMAN	SYCP1	4.93139	2.22067	0.612398	1.30983
sp|P84085|ARF5_HUMAN	ARF5_HUMAN	#N/A	#N/A	#N/A	0.950587	0.996205
sp|Q9Y265|RUVB1_HUMAN	RUVB1_HUMAN	RUVBL1	3.69256	1.9216	0.510395	1.49488
sp|Q07960|RHG01_HUMAN	RHG01_HUMAN	ARHGAP1	10.2152	3.19613	0.427498	1.86159
sp|Q969Z3|MARC2_HUMAN	MARC2_HUMAN	MARC2	3.5038	1.87184	0.608955	1.24664
sp|P51957|NEK4_HUMAN	NEK4_HUMAN	NEK4	3.62244	1.90327	0.99649	0.941306
sp|P63010|AP2B1_HUMAN	AP2B1_HUMAN	AP2B1	5.64181	2.37525	0.675632	1.14718
sp|Q9H8Y8|GORS2_HUMAN	GORS2_HUMAN	GORASP2	3.65471	1.91173	0.498963	1.46047
sp|Q8TCG1|CIP2A_HUMAN	CIP2A_HUMAN	CIP2A	6.11061	2.47196	0.493789	1.46373
sp|Q96GA3|LTV1_HUMAN	LTV1_HUMAN	LTV1	2.48551	1.57655	0.485021	1.4566
sp|Q9NZC7|WWOX_HUMAN	WWOX_HUMAN	WWOX	3.98317	1.99579	0.587399	1.20408
sp|Q6FI81|CPIN1_HUMAN	CPIN1_HUMAN	CIAPIN1	5.82148	2.41277	0.550079	1.26351
sp|Q16630|CPSF6_HUMAN	CPSF6_HUMAN	CPSF6	0	0	0.907641	0.931113
sp|Q5TC12|ATPF1_HUMAN	ATPF1_HUMAN	ATPAF1	4.34738	2.08504	0.52515	1.28287
sp|Q96P70|IPO9_HUMAN	IPO9_HUMAN	IPO9	4.67103	2.16126	0.622262	1.10931
sp|P33176|KINH_HUMAN	KINH_HUMAN	KIF5B	6.46632	2.5429	0.469704	1.41432
sp|P00338|LDHA_HUMAN	LDHA_HUMAN	LDHA	1.72855	1.31474	0.492218	1.33708
sp|Q99439|CNN2_HUMAN	CNN2_HUMAN	CNN2	4.02259	2.00564	0.563356	1.17929
sp|P56589|PEX3_HUMAN	PEX3_HUMAN	PEX3	0	0	0.531077	1.23852
sp|Q9Y4P8|WIPI2_HUMAN	WIPI2_HUMAN	WIPI2	3.5377	1.88088	0.485602	1.34833
sp|Q9H4A5|GLP3L_HUMAN	GLP3L_HUMAN	GOLPH3L	14.5327	3.81217	0.660136	1.04468
sp|Q9H0P0|5NT3A_HUMAN	5NT3A_HUMAN	NT5C3A	6.95791	2.63779	0.8874	0.896774
sp|Q8N6T3|ARFG1_HUMAN	ARFG1_HUMAN	ARFGAP1	3.24714	1.80198	0.513988	1.2486
sp|Q6NXT4|ZNT6_HUMAN	ZNT6_HUMAN	SLC30A6	0	0	0.754889	0.953983
sp|P46782|RS5_HUMAN	RS5_HUMAN	RPS5	3.48811	1.86765	0.459419	1.37941
sp|Q5HYI7|MTX3_HUMAN	MTX3_HUMAN	MTX3	3.96474	1.99117	0.489199	1.26478
sp|Q9UJS0|CMC2_HUMAN	CMC2_HUMAN	SLC25A13	1.75886	1.32622	0.54106	1.15011
sp|Q05655|KPCD_HUMAN	KPCD_HUMAN	PRKCD	14.8013	3.84725	0.576344	1.08191
sp|O60879|DIAP2_HUMAN	DIAP2_HUMAN	DIAPH2	0	0	0.633078	1.00981
sp|P14174|MIF_HUMAN	MIF_HUMAN	MIF	0	0	0.759625	0.908517
sp|Q9Y3E5|PTH2_HUMAN	PTH2_HUMAN	PTRH2	3.62244	1.90327	0.755422	0.903558
sp|Q9BZE4|NOG1_HUMAN	NOG1_HUMAN	GTPBP4	4.38809	2.09478	0.413876	1.40285
sp|P62917|RL8_HUMAN	RL8_HUMAN	RPL8	4.65586	2.15775	0.451031	1.2711
sp|Q9NVH0|EXD2_HUMAN	EXD2_HUMAN	EXD2	6.7608	2.60015	0.786944	0.870201
sp|P46060|RAGP1_HUMAN	RAGP1_HUMAN	RANGAP1	8.57252	2.92789	0.370788	1.62185
sp|Q8IVF7|FMNL3_HUMAN	FMNL3_HUMAN	FMNL3	3.82651	1.95615	0.421559	1.34945
sp|P35659|DEK_HUMAN	DEK_HUMAN	DEK	4.67876	2.16304	0.569242	1.01996
sp|P40926|MDHM_HUMAN	MDHM_HUMAN	MDH2	2.36786	1.53878	0.539367	1.04215
sp|P78344|IF4G2_HUMAN	IF4G2_HUMAN	EIF4G2	4.2067	2.05103	0.392919	1.41739
sp|P40763|STAT3_HUMAN	STAT3_HUMAN	STAT3	8.60473	2.93338	0.471553	1.15541
sp|P07437|TBB5_HUMAN	TBB5_HUMAN	TUBB	6.72607	2.59347	0.685116	0.892811
sp|O95470|SGPL1_HUMAN	SGPL1_HUMAN	SGPL1	7.45682	2.73072	0.401552	1.34594
sp|P06733|ENOA_HUMAN	ENOA_HUMAN	ENO1	3.96725	1.9918	0.435057	1.22731
sp|Q96R06|SPAG5_HUMAN	SPAG5_HUMAN	SPAG5	23.7517	4.87358	0.48166	1.10444
sp|Q9Y4H2|IRS2_HUMAN	IRS2_HUMAN	IRS2	5.8361	2.4158	0.384646	1.39501
sp|Q5VT06|CE350_HUMAN	CE350_HUMAN	CEP350	5.02617	2.24191	0.432954	1.20395
sp|P57737|CORO7_HUMAN	CORO7_HUMAN	CORO7	0	0	0.739958	0.81072
sp|P00387|NB5R3_HUMAN	NB5R3_HUMAN	CYB5R3	3.22605	1.79612	0.568312	0.928793
sp|P53597|SUCA_HUMAN	SUCA_HUMAN	SUCLG1	5.66938	2.38105	0.520743	0.964391
sp|Q7Z2W4|ZCCHV_HUMAN	ZCCHV_HUMAN	ZC3HAV1	8.12958	2.85124	0.43181	1.12429
sp|Q07020|RL18_HUMAN	RL18_HUMAN	RPL18	1.49021	1.22074	0.41903	1.14982
sp|O43399|TPD54_HUMAN	TPD54_HUMAN	TPD52L2	0	0	0.594646	0.881613
sp|Q9Y6R0|NUMBL_HUMAN	NUMBL_HUMAN	NUMBL	0	0	0.456404	1.05702
sp|P40222|TXLNA_HUMAN	TXLNA_HUMAN	TXLNA	4.37822	2.09242	0.468261	1.02038
sp|P68371|TBB4B_HUMAN	TBB4B_HUMAN	TUBB4B	6.83991	2.61532	0.614268	0.85254
sp|Q15056|IF4H_HUMAN	IF4H_HUMAN	EIF4H	1.84767	1.35929	0.409509	1.15056
sp|O94876|TMCC1_HUMAN	TMCC1_HUMAN	TMCC1	0	0	0.609181	0.846448
sp|Q9P246|STIM2_HUMAN	STIM2_HUMAN	STIM2	0	0	0.554633	0.887795
sp|Q3ZCM7|TBB8_HUMAN	TBB8_HUMAN	#N/A	#N/A	#N/A	0.416811	1.10044
sp|Q9ULE6|PALD_HUMAN	PALD_HUMAN	PALD1	4.78888	2.18835	0.361633	1.27772
sp|Q92667|AKAP1_HUMAN	AKAP1_HUMAN	AKAP1	11.2477	3.35375	0.632123	0.816819
sp|Q12923|PTN13_HUMAN	PTN13_HUMAN	PTPN13	7.01256	2.64812	0.349145	1.30276
sp|Q96S99|PKHF1_HUMAN	PKHF1_HUMAN	PLEKHF1	0	0	0.493545	0.927977
sp|Q9HD67|MYO10_HUMAN	MYO10_HUMAN	MYO10	9.23648	3.03916	0.390108	1.12088
sp|Q14247|SRC8_HUMAN	SRC8_HUMAN	CTTN	5.20062	2.28049	0.43613	1.00016
sp|Q53EZ4|CEP55_HUMAN	CEP55_HUMAN	CEP55	1.81656	1.3478	0.56891	0.83116
sp|Q9UGP4|LIMD1_HUMAN	LIMD1_HUMAN	LIMD1	1.89063	1.375	0.487869	0.913746
sp|P53367|ARFP1_HUMAN	ARFP1_HUMAN	ARFIP1	0	0	0.465965	0.932999
sp|Q5SVZ6|ZMYM1_HUMAN	ZMYM1_HUMAN	ZMYM1	5.54764	2.35534	0.362774	1.17547
sp|Q96AQ6|PBIP1_HUMAN	PBIP1_HUMAN	PBXIP1	0	0	0.568296	0.816303
sp|P04083|ANXA1_HUMAN	ANXA1_HUMAN	ANXA1	7.83816	2.79967	0.518797	0.857598
sp|Q3YEC7|RABL6_HUMAN	RABL6_HUMAN	RABL6	3.8241	1.95553	0.372917	1.12537
sp|P23284|PPIB_HUMAN	PPIB_HUMAN	PPIB	0	0	0.493297	0.875259
sp|Q7Z4H7|HAUS6_HUMAN	HAUS6_HUMAN	HAUS6	5.11213	2.261	0.326301	1.29719
sp|P12277|KCRB_HUMAN	KCRB_HUMAN	CKB	3.36882	1.83543	0.532716	0.824269
sp|Q9BZF9|UACA_HUMAN	UACA_HUMAN	UACA	4.69352	2.16645	0.363894	1.10984
sp|P40855|PEX19_HUMAN	PEX19_HUMAN	PEX19	4.97218	2.22984	0.368391	1.08945
sp|Q9Y6B6|SAR1B_HUMAN	SAR1B_HUMAN	SAR1B	1.52671	1.2356	0.476173	0.858497
sp|Q8NBA8|DTWD2_HUMAN	DTWD2_HUMAN	DTWD2	0	0	0.457581	0.879508
sp|O14531|DPYL4_HUMAN	DPYL4_HUMAN	DPYSL4	0	0	0.469785	0.853577
sp|Q8NDH2|CC168_HUMAN	CC168_HUMAN	CCDC168	0	0	0.419146	0.925875
sp|Q8WVX9|FACR1_HUMAN	FACR1_HUMAN	FAR1	0	0	0.598613	0.740852
sp|Q9P031|TAP26_HUMAN	TAP26_HUMAN	CCDC59	4.74868	2.17915	0.325511	1.20095
sp|P50479|PDLI4_HUMAN	PDLI4_HUMAN	PDLIM4	2.23074	1.49357	0.396285	0.963779
sp|Q9GZY8|MFF_HUMAN	MFF_HUMAN	MFF	3.18645	1.78506	0.350448	1.0896
sp|Q8TEY7|UBP33_HUMAN	UBP33_HUMAN	USP33	2.35619	1.53499	0.556144	0.761475
sp|Q9UHD8|SEPT9_HUMAN	SEPT9_HUMAN	SEPTIN9	0	0	0.497431	0.803622
sp|Q9NX58|LYAR_HUMAN	LYAR_HUMAN	LYAR	7.7338	2.78097	0.562699	0.745674
sp|Q9BR76|COR1B_HUMAN	COR1B_HUMAN	CORO1B	3.56689	1.88862	0.40476	0.923091
sp|Q99551|MTEF1_HUMAN	MTEF1_HUMAN	MTERF1	5.75063	2.39805	0.480108	0.806815
sp|Q9UHB9|SRP68_HUMAN	SRP68_HUMAN	SRP68	13.9156	3.73036	0.330832	1.11021
sp|P16333|NCK1_HUMAN	NCK1_HUMAN	NCK1	6.28806	2.5076	0.372033	0.940311
sp|Q68DQ2|CRBG3_HUMAN	CRBG3_HUMAN	CRYBG3	11.3223	3.36486	0.293049	1.24684
sp|Q9H444|CHM4B_HUMAN	CHM4B_HUMAN	CHMP4B	2.94926	1.71734	0.422068	0.835421
sp|O00763|ACACB_HUMAN	ACACB_HUMAN	ACACB	12.3867	3.51948	0.292422	1.21774
sp|O95478|NSA2_HUMAN	NSA2_HUMAN	NSA2	3.48127	1.86581	0.423718	0.825474
sp|Q8N2A8|PLD6_HUMAN	PLD6_HUMAN	PLD6	8.29117	2.87944	0.385693	0.866255
sp|Q71UM5|RS27L_HUMAN	RS27L_HUMAN	RPS27L	0	0	0.276546	1.23111
sp|P16152|CBR1_HUMAN	CBR1_HUMAN	CBR1	11.8394	3.44084	0.295718	1.09296
sp|P51570|GALK1_HUMAN	GALK1_HUMAN	GALK1	0	0	0.534631	0.661884
sp|Q5T8P6|RBM26_HUMAN	RBM26_HUMAN	RBM26	2.30302	1.51757	0.339579	0.890741
sp|O94822|LTN1_HUMAN	LTN1_HUMAN	LTN1	6.54157	2.55765	0.327878	0.913767
sp|Q8NF37|PCAT1_HUMAN	PCAT1_HUMAN	LPCAT1	0	0	0.530646	0.642932
sp|Q12965|MYO1E_HUMAN	MYO1E_HUMAN	MYO1E	3.47381	1.86382	0.412442	0.731652
sp|P13797|PLST_HUMAN	PLST_HUMAN	PLS3	5.04998	2.24722	0.345877	0.824088
sp|P23588|IF4B_HUMAN	IF4B_HUMAN	EIF4B	2.54544	1.59544	0.316097	0.89436
sp|Q66PJ3|AR6P4_HUMAN	AR6P4_HUMAN	ARL6IP4	1.77391	1.33188	0.289491	0.975998
sp|P30837|AL1B1_HUMAN	AL1B1_HUMAN	ALDH1B1	3.21524	1.79311	0.503236	0.637374
sp|Q9NYJ8|TAB2_HUMAN	TAB2_HUMAN	TAB2	0	0	0.359543	0.747116
sp|O95219|SNX4_HUMAN	SNX4_HUMAN	SNX4	2.26319	1.50439	0.499826	0.614665
sp|P68133|ACTS_HUMAN;sp|P68032|ACTC_HUMAN;sp|P63267|ACTH_HUMAN;sp|P62736|ACTA_HUMAN	ACTS_HUMAN	#N/A	#N/A	#N/A	0.327197	0.8005
sp|P11387|TOP1_HUMAN	TOP1_HUMAN	TOP1	2.48198	1.57543	0.287174	0.912234
sp|P22234|PUR6_HUMAN	PUR6_HUMAN	PAICS	2.3486	1.53251	0.390576	0.691011
sp|P49959|MRE11_HUMAN	MRE11_HUMAN	MRE11	4.99746	2.2355	0.353027	0.735184
sp|P63241|IF5A1_HUMAN;sp|Q6IS14|IF5AL_HUMAN;sp|Q9GZV4|IF5A2_HUMAN	IF5A1_HUMAN	EIF5A	2.11103	1.45294	0.309874	0.795511
sp|Q99570|PI3R4_HUMAN	PI3R4_HUMAN	PIK3R4	3.64239	1.9085	0.397161	0.65413
sp|A6NGR9|MROH6_HUMAN	MROH6_HUMAN	#N/A	#N/A	#N/A	0.33673	0.727625
sp|Q8NDI1|EHBP1_HUMAN	EHBP1_HUMAN	EHBP1	5.31797	2.30607	0.329676	0.71706
sp|Q92522|H1X_HUMAN	H1X_HUMAN	H1FX	4.18757	2.04636	0.26418	0.865153
sp|P49757|NUMB_HUMAN	NUMB_HUMAN	NUMB	3.4583	1.85965	0.267552	0.84527
sp|Q9NP64|NO40_HUMAN	NO40_HUMAN	ZCCHC17	1.99494	1.41242	0.283968	0.791683
sp|Q9UKF6|CPSF3_HUMAN	CPSF3_HUMAN	CPSF3	4.9014	2.21391	0.272914	0.825051
sp|Q9UER7|DAXX_HUMAN	DAXX_HUMAN	DAXX	2.8251	1.6808	0.26189	0.844371
sp|Q01081|U2AF1_HUMAN;sp|P0DN76|U2AF5_HUMAN	U2AF1_HUMAN	U2AF1	2.94437	1.71592	0.34142	0.653431
sp|P11940|PABP1_HUMAN	PABP1_HUMAN	PABPC1	2.29424	1.51467	0.321328	0.682085
sp|P36578|RL4_HUMAN	RL4_HUMAN	RPL4	3.13942	1.77184	0.26728	0.78394
sp|Q14674|ESPL1_HUMAN	ESPL1_HUMAN	ESPL1	0	0	0.293136	0.715177
sp|P37802|TAGL2_HUMAN	TAGL2_HUMAN	TAGLN2	3.97059	1.99263	0.339663	0.636909
sp|Q8NBU5|ATAD1_HUMAN	ATAD1_HUMAN	ATAD1	0	0	0.396503	0.5619
sp|Q5JTW2|CEP78_HUMAN	CEP78_HUMAN	CEP78	3.28881	1.81351	0.230029	0.865789
sp|Q07820|MCL1_HUMAN	MCL1_HUMAN	MCL1	2.25186	1.50062	0.266402	0.717831
sp|P05166|PCCB_HUMAN	PCCB_HUMAN	PCCB	5.59215	2.36477	0.250089	0.737363
sp|P62277|RS13_HUMAN	RS13_HUMAN	RPS13	2.39039	1.54609	0.238468	0.765244
sp|P11586|C1TC_HUMAN	C1TC_HUMAN	MTHFD1	4.09048	2.02249	0.232176	0.774568
sp|Q5T5U3|RHG21_HUMAN	RHG21_HUMAN	ARHGAP21	1.66521	1.29043	0.303363	0.59619
sp|O14641|DVL2_HUMAN	DVL2_HUMAN	DVL2	4.01025	2.00256	0.269076	0.651796
sp|Q14596|NBR1_HUMAN	NBR1_HUMAN	NBR1	3.7053	1.92492	0.295787	0.584403
sp|Q969Q0|RL36L_HUMAN	RL36L_HUMAN	RPL36AL	7.02946	2.65131	0.218784	0.76779
sp|P32780|TF2H1_HUMAN	TF2H1_HUMAN	GTF2H1	1.08806	1.0431	0.287414	0.581491
sp|Q15417|CNN3_HUMAN	CNN3_HUMAN	CNN3	2.72704	1.65137	0.212425	0.76629
sp|Q8WY36|BBX_HUMAN	BBX_HUMAN	BBX	3.50037	1.87093	0.213124	0.750226
sp|Q5VTE0|EF1A3_HUMAN;sp|P68104|EF1A1_HUMAN	EF1A3_HUMAN	EEF1A1P5	0	0	0.454869	0.447347
sp|Q96C57|CL043_HUMAN	CL043_HUMAN	CUSTOS	3.66519	1.91447	0.248502	0.630247
sp|P22626|ROA2_HUMAN	ROA2_HUMAN	HNRNPA2B1	0	0	0.292641	0.554093
sp|Q8IY81|SPB1_HUMAN	SPB1_HUMAN	FTSJ3	4.37573	2.09183	0.258951	0.60655
sp|Q9NWT8|AKIP_HUMAN	AKIP_HUMAN	AURKAIP1	3.56508	1.88814	0.204938	0.76811
sp|Q7Z434|MAVS_HUMAN	MAVS_HUMAN	MAVS	6.37174	2.52423	0.343196	0.497825
sp|P19367|HXK1_HUMAN	HXK1_HUMAN	HK1	8.51553	2.91814	0.223933	0.671136
sp|P39023|RL3_HUMAN	RL3_HUMAN	RPL3	2.60951	1.6154	0.228113	0.655558
sp|P08865|RSSA_HUMAN	RSSA_HUMAN	RPSA	3.26672	1.80741	0.274521	0.556998
sp|P08243|ASNS_HUMAN	ASNS_HUMAN	ASNS	4.79632	2.19005	0.357962	0.474878
sp|P62910|RL32_HUMAN	RL32_HUMAN	RPL32	2.55672	1.59897	0.251891	0.575376
sp|P62266|RS23_HUMAN	RS23_HUMAN	RPS23	7.75266	2.78436	0.343104	0.468598
sp|Q92889|XPF_HUMAN	XPF_HUMAN	ERCC4	0	0	0.207705	0.682181
sp|O00750|P3C2B_HUMAN	P3C2B_HUMAN	PIK3C2B	2.68924	1.63989	0.248164	0.564207
sp|Q1ED39|KNOP1_HUMAN	KNOP1_HUMAN	KNOP1	3.95246	1.98808	0.21143	0.654779
sp|Q9NRA8|4ET_HUMAN	4ET_HUMAN	EIF4ENIF1	4.04698	2.01171	0.191738	0.722959
sp|P07195|LDHB_HUMAN	LDHB_HUMAN	LDHB	1.97106	1.40394	0.211095	0.640416
sp|Q08945|SSRP1_HUMAN	SSRP1_HUMAN	SSRP1	1.91034	1.38215	0.257998	0.533344
sp|Q92968|PEX13_HUMAN	PEX13_HUMAN	PEX13	4.57392	2.13867	0.238404	0.557384
sp|Q9Y3U8|RL36_HUMAN	RL36_HUMAN	RPL36	2.81467	1.6777	0.246671	0.531768
sp|O14795|UN13B_HUMAN	UN13B_HUMAN	UNC13B	1.34278	1.15878	0.245344	0.530529
sp|Q99618|CDCA3_HUMAN	CDCA3_HUMAN	CDCA3	6.48099	2.54578	0.257175	0.505077
sp|P47712|PA24A_HUMAN	PA24A_HUMAN	PLA2G4A	2.15447	1.46781	0.201212	0.622943
sp|Q7Z6K5|ARPIN_HUMAN	ARPIN_HUMAN	ARPIN	3.02494	1.73924	0.192663	0.646635
sp|Q9UBC9|SPRR3_HUMAN	SPRR3_HUMAN	SPRR3	0	0	0.290359	0.459996
sp|Q8N0Z3|SPICE_HUMAN	SPICE_HUMAN	SPICE1	2.62561	1.62037	0.188783	0.649563
sp|Q9BU76|MMTA2_HUMAN	MMTA2_HUMAN	MMTAG2	3.32351	1.82305	0.331398	0.425161
sp|O95373|IPO7_HUMAN	IPO7_HUMAN	IPO7	3.9078	1.97682	0.17158	0.733209
sp|P84077|ARF1_HUMAN;sp|P61204|ARF3_HUMAN	ARF1_HUMAN	ARF1	2.53717	1.59285	0.257595	0.47744
sp|Q14684|RRP1B_HUMAN	RRP1B_HUMAN	RRP1B	6.54651	2.55861	0.273818	0.449732
sp|P52594|AGFG1_HUMAN	AGFG1_HUMAN	AGFG1	1.91864	1.38515	0.206615	0.551531
sp|O00151|PDLI1_HUMAN	PDLI1_HUMAN	PDLIM1	2.47629	1.57362	0.191186	0.585133
sp|P83731|RL24_HUMAN	RL24_HUMAN	RPL24	5.9281	2.43477	0.318145	0.394708
sp|A1L0T0|ILVBL_HUMAN	ILVBL_HUMAN	ILVBL	4.93924	2.22244	0.399426	0.356814
sp|Q9H792|PEAK1_HUMAN	PEAK1_HUMAN	PEAK1	0	0	0.254011	0.424878
sp|Q9Y2I7|FYV1_HUMAN	FYV1_HUMAN	PIKFYVE	4.91143	2.21618	0.21817	0.465522
sp|P62829|RL23_HUMAN	RL23_HUMAN	RPL23	5.1547	2.2704	0.325352	0.371024
sp|P12004|PCNA_HUMAN	PCNA_HUMAN	PCNA	2.68356	1.63816	0.215617	0.463624
sp|P04075|ALDOA_HUMAN	ALDOA_HUMAN	ALDOA	3.48393	1.86653	0.175322	0.556961
sp|Q32MZ4|LRRF1_HUMAN	LRRF1_HUMAN	LRRFIP1	0	0	0.2054	0.474467
sp|Q9NZ45|CISD1_HUMAN	CISD1_HUMAN	CISD1	3.27441	1.80953	0.204114	0.468508
sp|P52429|DGKE_HUMAN	DGKE_HUMAN	DGKE	0	0	0.216782	0.443113
sp|P39019|RS19_HUMAN	RS19_HUMAN	RPS19	0	0	0.194372	0.481855
sp|Q9H2G2|SLK_HUMAN	SLK_HUMAN	SLK	5.8085	2.41008	0.14788	0.649521
sp|O14640|DVL1_HUMAN;sp|P54792|DVLP1_HUMAN	DVL1_HUMAN	DVL1	1.6331	1.27793	0.174332	0.521049
sp|P61081|UBC12_HUMAN	UBC12_HUMAN	UBE2M	1.44269	1.20112	0.178082	0.503615
sp|P10412|H14_HUMAN	H14_HUMAN	HIST1H1E	11.9533	3.45736	0.209507	0.436314
sp|O00471|EXOC5_HUMAN	EXOC5_HUMAN	EXOC5	0	0	0.262457	0.37383
sp|Q9UPW5|CBPC1_HUMAN	CBPC1_HUMAN	AGTPBP1	4.31872	2.07815	0.181595	0.477487
sp|P17812|PYRG1_HUMAN	PYRG1_HUMAN	CTPS1	3.51728	1.87544	0.151166	0.581152
sp|P25205|MCM3_HUMAN	MCM3_HUMAN	MCM3	3.6574	1.91243	0.173611	0.492238
sp|Q15907|RB11B_HUMAN	RB11B_HUMAN	RAB11B	0	0	0.132738	0.695004
sp|Q53H12|AGK_HUMAN	AGK_HUMAN	AGK	4.6369	2.15335	0.159484	0.529589
sp|P15880|RS2_HUMAN	RS2_HUMAN	RPS2	2.90218	1.70358	0.19899	0.429619
sp|Q9NVI1|FANCI_HUMAN	FANCI_HUMAN	FANCI	1.41264	1.18855	0.192651	0.437923
sp|Q9UBC2|EP15R_HUMAN	EP15R_HUMAN	EPS15L1	4.22346	2.0551	0.153225	0.54355
sp|P61513|RL37A_HUMAN	RL37A_HUMAN	RPL37A	4.36877	2.09016	0.170119	0.467035
sp|Q9HCL2|GPAT1_HUMAN	GPAT1_HUMAN	GPAM	3.05674	1.74835	0.150356	0.514091
sp|P60891|PRPS1_HUMAN;sp|P21108|PRPS3_HUMAN;sp|P11908|PRPS2_HUMAN	PRPS1_HUMAN	PRPS1	2.74399	1.6565	0.18734	0.407482
sp|O15498|YKT6_HUMAN	YKT6_HUMAN	YKT6	5.03925	2.24483	0.259621	0.33485
sp|O75431|MTX2_HUMAN	MTX2_HUMAN	MTX2	0	0	0.171701	0.427002
sp|Q9Y285|SYFA_HUMAN	SYFA_HUMAN	FARSA	0	0	0.229496	0.348707
sp|Q9BRS2|RIOK1_HUMAN	RIOK1_HUMAN	RIOK1	4.3498	2.08562	0.173209	0.421852
sp|Q9H082|RB33B_HUMAN	RB33B_HUMAN	RAB33B	4.43755	2.10655	0.119045	0.682409
sp|Q96AY4|TTC28_HUMAN	TTC28_HUMAN	TTC28	4.78418	2.18728	0.119676	0.621851
sp|Q12983|BNIP3_HUMAN	BNIP3_HUMAN	BNIP3	1.05757	1.02838	0.163933	0.416409
sp|P61247|RS3A_HUMAN	RS3A_HUMAN	RPS3A	3.09861	1.76029	0.132556	0.511119
sp|Q05682|CALD1_HUMAN	CALD1_HUMAN	CALD1	4.45156	2.10987	0.138532	0.47727
sp|P63173|RL38_HUMAN	RL38_HUMAN	RPL38	2.63436	1.62307	0.140124	0.464999
sp|Q86SQ0|PHLB2_HUMAN	PHLB2_HUMAN	PHLDB2	4.15633	2.03871	0.136547	0.47912
sp|Q92997|DVL3_HUMAN	DVL3_HUMAN	DVL3	4.92248	2.21867	0.13278	0.486528
sp|P63000|RAC1_HUMAN;sp|P60763|RAC3_HUMAN;sp|P15153|RAC2_HUMAN	RAC1_HUMAN	RAC1	5.99919	2.44933	0.108215	0.674348
sp|Q7Z5P9|MUC19_HUMAN	MUC19_HUMAN	MUC19	0	0	0.10975	0.648198
sp|P10809|CH60_HUMAN	CH60_HUMAN	HSPD1	3.31567	1.8209	0.137376	0.450569
sp|P04406|G3P_HUMAN	G3P_HUMAN	GAPDH	1.54918	1.24466	0.1324	0.468546
sp|Q96A65|EXOC4_HUMAN	EXOC4_HUMAN	EXOC4	4.77119	2.1843	0.134277	0.457859
sp|P55010|IF5_HUMAN	IF5_HUMAN	EIF5	3.33325	1.82572	0.129714	0.468171
sp|Q9Y490|TLN1_HUMAN	TLN1_HUMAN	TLN1	7.97579	2.82414	0.126036	0.482411
sp|Q9HCD6|TANC2_HUMAN	TANC2_HUMAN	TANC2	1.62683	1.27547	0.151621	0.392117
sp|P07355|ANXA2_HUMAN;sp|A6NMY6|AXA2L_HUMAN	ANXA2_HUMAN	ANXA2	4.81905	2.19523	0.140641	0.412365
sp|Q9Y4G8|RPGF2_HUMAN	RPGF2_HUMAN	RAPGEF2	0	0	0.161901	0.358994
sp|P15924|DESP_HUMAN	DESP_HUMAN	DSP	6.32679	2.51531	0.111051	0.527503
sp|Q99700|ATX2_HUMAN	ATX2_HUMAN	ATXN2	0	0	0.15016	0.356803
sp|Q8WTT2|NOC3L_HUMAN	NOC3L_HUMAN	NOC3L	4.18974	2.04689	0.132033	0.402137
sp|Q96ME7|ZN512_HUMAN	ZN512_HUMAN	ZNF512	0	0	0.142946	0.369157
sp|A6NKT7|RGPD3_HUMAN	RGPD3_HUMAN	#N/A	#N/A	#N/A	0.129177	0.392052
sp|P50991|TCPD_HUMAN	TCPD_HUMAN	CCT4	0	0	0.162278	0.320282
sp|P51648|AL3A2_HUMAN	AL3A2_HUMAN	ALDH3A2	4.00744	2.00186	0.255687	0.254694
sp|Q5T280|CI114_HUMAN	CI114_HUMAN	SPOUT1	3.95028	1.98753	0.133795	0.373633
sp|Q13442|HAP28_HUMAN	HAP28_HUMAN	PDAP1	0	0	0.162314	0.312296
sp|Q8IWE2|NXP20_HUMAN	NXP20_HUMAN	FAM114A1	8.0627	2.83949	0.136674	0.354624
sp|Q9UKE5|TNIK_HUMAN	TNIK_HUMAN	TNIK	0	0	0.159772	0.313312
sp|Q2M2I8|AAK1_HUMAN	AAK1_HUMAN	AAK1	1.26432	1.12442	0.133778	0.355894
sp|Q9Y5K6|CD2AP_HUMAN	CD2AP_HUMAN	CD2AP	2.97896	1.72597	0.109274	0.435332
sp|Q2TBE0|C19L2_HUMAN	C19L2_HUMAN	CWF19L2	2.33218	1.52715	0.165378	0.288172
sp|Q9Y388|RBMX2_HUMAN	RBMX2_HUMAN	RBMX2	2.78578	1.66907	0.119202	0.37075
sp|O94813|SLIT2_HUMAN	SLIT2_HUMAN	SLIT2	1.96871	1.40311	0.105045	0.427992
sp|Q12955|ANK3_HUMAN	ANK3_HUMAN	ANK3	0	0	0.135924	0.323447
sp|Q05397|FAK1_HUMAN	FAK1_HUMAN	PTK2	2.35619	1.53499	0.165957	0.280839
sp|P48651|PTSS1_HUMAN	PTSS1_HUMAN	PTDSS1	0	0	0.121836	0.354292
sp|Q8N350|CBARP_HUMAN	CBARP_HUMAN	CBARP	0	0	0.111067	0.369323
sp|Q9C026|TRIM9_HUMAN	TRIM9_HUMAN	TRIM9	3.96094	1.99021	0.175553	0.257553
sp|Q8N6R0|MET13_HUMAN	MET13_HUMAN	METTL13	1.8784	1.37055	0.131665	0.309206
sp|P62753|RS6_HUMAN	RS6_HUMAN	RPS6	6.42812	2.53537	0.185702	0.24284
sp|O75381|PEX14_HUMAN	PEX14_HUMAN	PEX14	3.37294	1.83656	0.0988669	0.40221
sp|O00571|DDX3X_HUMAN;sp|O15523|DDX3Y_HUMAN	DDX3X_HUMAN	DDX3X	2.39021	1.54603	0.100198	0.391876
sp|P78527|PRKDC_HUMAN	PRKDC_HUMAN	PRKDC	8.35472	2.89045	0.111321	0.341585
sp|Q9BZF1|OSBL8_HUMAN	OSBL8_HUMAN	OSBPL8	0.949223	0.974281	0.126325	0.29973
sp|P06576|ATPB_HUMAN	ATPB_HUMAN	ATP5F1B	3.6401	1.9079	0.123191	0.301059
sp|Q9BPX3|CND3_HUMAN	CND3_HUMAN	NCAPG	2.25155	1.50052	0.13657	0.269201
sp|P28288|ABCD3_HUMAN	ABCD3_HUMAN	ABCD3	9.96869	3.15732	0.168356	0.236211
sp|P21397|AOFA_HUMAN	AOFA_HUMAN	MAOA	4.91818	2.2177	0.0805995	0.495617
sp|O95391|SLU7_HUMAN	SLU7_HUMAN	SLU7	2.81109	1.67663	0.131175	0.268086
sp|Q58EX7|PKHG4_HUMAN	PKHG4_HUMAN	PLEKHG4	0	0	0.145106	0.248327
sp|P55072|TERA_HUMAN	TERA_HUMAN	VCP	0	0	0.112597	0.290453
sp|Q9UL25|RAB21_HUMAN	RAB21_HUMAN	RAB21	3.1945	1.78732	0.117327	0.280053
sp|Q9Y6Y8|S23IP_HUMAN	S23IP_HUMAN	SEC23IP	1.15609	1.07522	0.0984344	0.324604
sp|Q96JB5|CK5P3_HUMAN	CK5P3_HUMAN	CDK5RAP3	0	0	0.128589	0.254929
sp|Q13596|SNX1_HUMAN	SNX1_HUMAN	SNX1	2.15573	1.46824	0.0899391	0.345329
sp|P05165|PCCA_HUMAN	PCCA_HUMAN	PCCA	15.4354	3.9288	0.0778999	0.418071
sp|Q9GZT9|EGLN1_HUMAN	EGLN1_HUMAN	EGLN1	2.35588	1.53489	0.113892	0.257304
sp|Q9UBF2|COPG2_HUMAN	COPG2_HUMAN	COPG2	3.56398	1.88785	0.0857678	0.339316
sp|Q14103|HNRPD_HUMAN	HNRPD_HUMAN	HNRNPD	3.25361	1.80378	0.123611	0.235073
sp|P49792|RBP2_HUMAN	RBP2_HUMAN	RANBP2	7.36938	2.71466	0.0730335	0.393865
sp|Q9UHQ9|NB5R1_HUMAN	NB5R1_HUMAN	CYB5R1	2.3683	1.53893	0.0828379	0.305163
sp|Q59GN2|R39L5_HUMAN;sp|P62891|RL39_HUMAN	R39L5_HUMAN	RPL39P5	34.3435	5.86033	0.0860415	0.290944
sp|Q5T8D3|ACBD5_HUMAN	ACBD5_HUMAN	ACBD5	4.15916	2.0394	0.0814972	0.302439
sp|Q71U36|TBA1A_HUMAN	TBA1A_HUMAN	TUBA1A	0	0	0.10585	0.231779
sp|Q8IWS0|PHF6_HUMAN	PHF6_HUMAN	PHF6	3.35363	1.83129	0.0790912	0.307071
sp|P28340|DPOD1_HUMAN	DPOD1_HUMAN	POLD1	0	0	0.102228	0.234985
sp|Q9HB21|PKHA1_HUMAN	PKHA1_HUMAN	PLEKHA1	0	0	0.107744	0.218594
sp|Q7Z569|BRAP_HUMAN	BRAP_HUMAN	BRAP	0	0	0.0937852	0.243193
sp|P62081|RS7_HUMAN	RS7_HUMAN	RPS7	2.37705	1.54177	0.119577	0.203504
sp|O00541|PESC_HUMAN	PESC_HUMAN	PES1	3.42108	1.84962	0.0798033	0.282577
sp|Q13492|PICAL_HUMAN	PICAL_HUMAN	PICALM	1.49125	1.22117	0.0906024	0.225764
sp|O60488|ACSL4_HUMAN	ACSL4_HUMAN	ACSL4	1.80131	1.34213	0.0947213	0.215098
sp|Q5T9A4|ATD3B_HUMAN	ATD3B_HUMAN	#N/A	#N/A	#N/A	0.0934593	0.216297
sp|Q92575|UBXN4_HUMAN	UBXN4_HUMAN	UBXN4	3.73703	1.93314	0.0867518	0.209883
sp|Q6P1L8|RM14_HUMAN	RM14_HUMAN	MRPL14	0	0	0.104894	0.175424
sp|P14625|ENPL_HUMAN	ENPL_HUMAN	HSP90B1	2.75338	1.65933	0.0698041	0.237975
sp|Q9ULH7|MKL2_HUMAN	MKL2_HUMAN	MRTFB	3.87132	1.96757	0.0638037	0.26447
sp|Q13136|LIPA1_HUMAN	LIPA1_HUMAN	PPFIA1	3.03231	1.74135	0.0726146	0.211774
sp|O60271|JIP4_HUMAN	JIP4_HUMAN	SPAG9	12.9231	3.59487	0.0625776	0.246
sp|Q9BVP2|GNL3_HUMAN	GNL3_HUMAN	GNL3	9.46554	3.07661	0.119013	0.143395
sp|O14976|GAK_HUMAN	GAK_HUMAN	GAK	2.32149	1.52364	0.0603241	0.2243
sp|O75694|NU155_HUMAN	NU155_HUMAN	NUP155	2.10449	1.45069	0.0551555	0.249708
sp|Q9BQA1|MEP50_HUMAN	MEP50_HUMAN	WDR77	1.72888	1.31487	0.0680727	0.187924
sp|E9PAV3|NACAM_HUMAN;sp|Q13765|NACA_HUMAN	NACAM_HUMAN	NACA	1.29127	1.13634	0.0571008	0.223862
sp|Q96KP1|EXOC2_HUMAN	EXOC2_HUMAN	EXOC2	1.97107	1.40395	0.0633741	0.19668
sp|Q9P032|NDUF4_HUMAN	NDUF4_HUMAN	NDUFAF4	0	0	0.064378	0.191666
sp|Q5DJT8|CT452_HUMAN;sp|P0DMV2|CT459_HUMAN;sp|P0DMV1|CT458_HUMAN;sp|P0DMU9|CT45A_HUMAN;sp|Q8NHU0|CT453_HUMAN;sp|Q5HYN5|CT451_HUMAN;sp|P0DMV0|CT457_HUMAN;sp|P0DMU8|CT455_HUMAN;sp|P0DMU7|CT456_HUMAN	CT452_HUMAN	CT45A2	0	0	0.0646101	0.187844
sp|P36542|ATPG_HUMAN	ATPG_HUMAN	ATP5F1C	2.47029	1.57172	0.058134	0.209812
sp|P61604|CH10_HUMAN	CH10_HUMAN	HSPE1	0	0	0.0636484	0.18792
sp|P32322|P5CR1_HUMAN	P5CR1_HUMAN	PYCR1	0	0	0.0662862	0.176337
sp|Q9Y6A5|TACC3_HUMAN	TACC3_HUMAN	TACC3	0	0	0.106957	0.128018
sp|O00410|IPO5_HUMAN	IPO5_HUMAN	IPO5	1.13813	1.06683	0.0585113	0.187766
sp|Q96RQ3|MCCA_HUMAN	MCCA_HUMAN	MCCC1	7.70052	2.77498	0.0538922	0.202292
sp|P46777|RL5_HUMAN	RL5_HUMAN	RPL5	4.59456	2.14349	0.0690611	0.151184
sp|P62195|PRS8_HUMAN	PRS8_HUMAN	PSMC5	0	0	0.0894545	0.121351
sp|Q9BXK5|B2L13_HUMAN	B2L13_HUMAN	BCL2L13	5.36494	2.31623	0.0622899	0.148957
sp|P11498|PYC_HUMAN	PYC_HUMAN	PC	19.4742	4.41295	0.0660015	0.139472
sp|P42677|RS27_HUMAN	RS27_HUMAN	RPS27	3.55979	1.88674	0.0678302	0.134545
sp|P49207|RL34_HUMAN	RL34_HUMAN	RPL34	2.97333	1.72433	0.0678528	0.132666
sp|Q96P47|AGAP3_HUMAN	AGAP3_HUMAN	AGAP3	3.51697	1.87536	0.0497924	0.173835
sp|P15311|EZRI_HUMAN	EZRI_HUMAN	EZR	2.04649	1.43056	0.0531773	0.159714
sp|Q6Y7W6|GGYF2_HUMAN	GGYF2_HUMAN	GIGYF2	4.70051	2.16807	0.0468121	0.176099
sp|Q9NQV6|PRD10_HUMAN	PRD10_HUMAN	PRDM10	5.42704	2.3296	0.0686141	0.124487
sp|P23396|RS3_HUMAN	RS3_HUMAN	RPS3	3.71332	1.927	0.0504298	0.158567
sp|P62820|RAB1A_HUMAN	RAB1A_HUMAN	RAB1A	5.00616	2.23745	0.0488535	0.159493
sp|P62847|RS24_HUMAN	RS24_HUMAN	RPS24	3.84602	1.96113	0.065363	0.120296
sp|Q9BQG0|MBB1A_HUMAN	MBB1A_HUMAN	MYBBP1A	8.68741	2.94744	0.0640217	0.113576
sp|O60645|EXOC3_HUMAN	EXOC3_HUMAN	EXOC3	0	0	0.0521041	0.121884
sp|Q16891|MIC60_HUMAN	MIC60_HUMAN	IMMT	1.20185	1.09629	0.0428185	0.146229
sp|O95905|ECD_HUMAN	ECD_HUMAN	ECD	2.07966	1.4421	0.0478665	0.128701
sp|Q03001|DYST_HUMAN	DYST_HUMAN	DST	7.89937	2.81058	0.034682	0.188151
sp|P62750|RL23A_HUMAN	RL23A_HUMAN	RPL23A	4.76077	2.18192	0.0680999	0.0940458
sp|Q5JTH9|RRP12_HUMAN	RRP12_HUMAN	RRP12	7.06453	2.65792	0.0622124	0.0982786
sp|Q9C0B7|TNG6_HUMAN	TNG6_HUMAN	TANGO6	1.82632	1.35141	0.0437003	0.126271
sp|Q96EB1|ELP4_HUMAN	ELP4_HUMAN	ELP4	2.27124	1.50706	0.0482728	0.114396
sp|Q92841|DDX17_HUMAN	DDX17_HUMAN	DDX17	0	0	0.0425824	0.128166
sp|P09874|PARP1_HUMAN	PARP1_HUMAN	PARP1	3.76951	1.94152	0.045279	0.101434
sp|Q5XPI4|RN123_HUMAN	RN123_HUMAN	RNF123	1.32858	1.15264	0.037106	0.109408
sp|Q15365|PCBP1_HUMAN	PCBP1_HUMAN	PCBP1	2.59143	1.60979	0.0470025	0.086724
sp|Q9UJU6|DBNL_HUMAN	DBNL_HUMAN	DBNL	1.73652	1.31777	0.0455588	0.0852909
sp|P30048|PRDX3_HUMAN	PRDX3_HUMAN	PRDX3	1.54131	1.2415	0.0342121	0.104872
sp|O43169|CYB5B_HUMAN	CYB5B_HUMAN	CYB5B	0.819284	0.905143	0.0285919	0.128775
sp|Q8IZH2|XRN1_HUMAN	XRN1_HUMAN	XRN1	5.2495	2.29118	0.0257266	0.136432
sp|O14966|RAB7L_HUMAN	RAB7L_HUMAN	RAB29	2.4135	1.55355	0.0305249	0.0998605
sp|Q16650|TBR1_HUMAN	TBR1_HUMAN	TBR1	0	0	0.0364085	0.0831942
sp|P46776|RL27A_HUMAN	RL27A_HUMAN	RPL27A	4.4175	2.10179	0.0423155	0.0704667
sp|Q9Y5V3|MAGD1_HUMAN	MAGD1_HUMAN	MAGED1	0	0	0.0330973	0.0798205
sp|O95433|AHSA1_HUMAN	AHSA1_HUMAN	AHSA1	1.25984	1.12242	0.0283746	0.0844258
sp|P51003|PAPOA_HUMAN	PAPOA_HUMAN	PAPOLA	1.31843	1.14823	0.0292155	0.079254
sp|O14617|AP3D1_HUMAN	AP3D1_HUMAN	AP3D1	5.15438	2.27033	0.0376128	0.0635784
sp|Q14008|CKAP5_HUMAN	CKAP5_HUMAN	CKAP5	4.75288	2.18011	0.0200543	0.114917
sp|Q14145|KEAP1_HUMAN	KEAP1_HUMAN	KEAP1	0	0	0.0293706	0.0655105
sp|P08240|SRPRA_HUMAN	SRPRA_HUMAN	SRPRA	1.77346	1.33171	0.0207798	0.0860915
sp|P31943|HNRH1_HUMAN	HNRH1_HUMAN	HNRNPH1	0	0	0.0332477	0.0530391
sp|Q96AG4|LRC59_HUMAN	LRC59_HUMAN	LRRC59	2.39773	1.54846	0.0238901	0.0632161
sp|Q00005|2ABB_HUMAN;sp|P63151|2ABA_HUMAN;sp|Q66LE6|2ABD_HUMAN	2ABB_HUMAN	#N/A	#N/A	#N/A	0.0234963	0.048955
sp|P25705|ATPA_HUMAN	ATPA_HUMAN	ATP5F1A	3.30894	1.81905	0.0166874	0.0662577
sp|P62826|RAN_HUMAN	RAN_HUMAN	RAN	0	0	0.017162	0.0578069
sp|P22102|PUR2_HUMAN	PUR2_HUMAN	GART	0	0	0.0167484	0.049746
sp|P60468|SC61B_HUMAN	SC61B_HUMAN	SEC61B	0.925693	0.96213	0.0137241	0.0534868
sp|Q9BZF3|OSBL6_HUMAN	OSBL6_HUMAN	OSBPL6	3.88498	1.97104	0.0132582	0.0559562
sp|P14923|PLAK_HUMAN	PLAK_HUMAN	JUP	3.10394	1.7618	0.0142898	0.0414783
sp|O96011|PX11B_HUMAN	PX11B_HUMAN	PEX11B	2.33835	1.52917	0.011204	0.039455
sp|Q06830|PRDX1_HUMAN	PRDX1_HUMAN	PRDX1	2.86167	1.69165	0.0142382	0.0256489
sp|Q07812|BAX_HUMAN	BAX_HUMAN	BAX	2.66806	1.63342	0.00805801	0.0367301
sp|Q9NZJ5|E2AK3_HUMAN	E2AK3_HUMAN	EIF2AK3	0	0	0.00962863	0.0275988
sp|Q96HE9|PRR11_HUMAN	PRR11_HUMAN	PRR11	2.10926	1.45233	0.00949887	0.0248683
sp|Q9HAV4|XPO5_HUMAN	XPO5_HUMAN	XPO5	0	0	0.0120274	0.0184511
sp|P18621|RL17_HUMAN	RL17_HUMAN	RPL17	3.95866	1.98964	0.0131789	0.0158985
sp|P46779|RL28_HUMAN	RL28_HUMAN	RPL28	2.95601	1.71931	0.00938133	0.0184247
sp|P13639|EF2_HUMAN	EF2_HUMAN	EEF2	3.50488	1.87213	0.00814565	0.018989
sp|Q13085|ACACA_HUMAN	ACACA_HUMAN	ACACA	25.8963	5.08884	0.00751401	0.0151659
sp|P62701|RS4X_HUMAN	RS4X_HUMAN	RPS4X	3.64825	1.91004	0.00662876	0.0136733
sp|Q86T24|KAISO_HUMAN	KAISO_HUMAN	ZBTB33	0	0	0.00554914	0.015595
sp|Q8N0X7|SPG20_HUMAN	SPG20_HUMAN	SPART	2.39495	1.54756	0.00468703	0.0185831
sp|Q8N9N7|LRC57_HUMAN	LRC57_HUMAN	LRRC57	1.42309	1.19293	0.00526832	0.0151553
sp|Q14974|IMB1_HUMAN	IMB1_HUMAN	KPNB1	1.78866	1.33741	0.0043055	0.0164593
sp|Q9HCG7|GBA2_HUMAN	GBA2_HUMAN	GBA2	0	0	0.00704273	0.0103847
sp|Q9H0S4|DDX47_HUMAN	DDX47_HUMAN	DDX47	0	0	0.0040684	0.0129393
sp|Q15361|TTF1_HUMAN	TTF1_HUMAN	TTF1	3.89433	1.97341	0.0030857	0.0153862
sp|Q00341|VIGLN_HUMAN	VIGLN_HUMAN	HDLBP	4.96177	2.2275	0.00279399	0.0142477
sp|O60716|CTND1_HUMAN	CTND1_HUMAN	CTNND1	1.20172	1.09623	0.00096383	0.00424825
sp|Q9Y4I1|MYO5A_HUMAN	MYO5A_HUMAN	MYO5A	0	0	3.17231e-05	7.55142e-05
sp|P56182|RRP1_HUMAN	RRP1_HUMAN	RRP1	3.68451	1.91951	0.000209246	-0.000785336
sp|O43143|DHX15_HUMAN	DHX15_HUMAN	DHX15	2.57349	1.60421	0.00129688	-0.00516532
sp|P84098|RL19_HUMAN	RL19_HUMAN	RPL19	5.74545	2.39697	0.00260235	-0.00372625
sp|O75643|U520_HUMAN	U520_HUMAN	SNRNP200	1.29285	1.13704	0.00153957	-0.00587511
sp|P27635|RL10_HUMAN	RL10_HUMAN	RPL10	5.803	2.40894	0.00391254	-0.00528722
sp|P42766|RL35_HUMAN	RL35_HUMAN	RPL35	7.48443	2.73577	0.00363736	-0.00560031
sp|O95793|STAU1_HUMAN	STAU1_HUMAN	STAU1	0	0	0.00436964	-0.0108933
sp|P49006|MRP_HUMAN	MRP_HUMAN	MARCKSL1	2.39663	1.54811	0.00914053	-0.0209942
sp|Q00325|MPCP_HUMAN	MPCP_HUMAN	SLC25A3	3.24979	1.80272	0.0092837	-0.0230812
sp|Q9Y2X9|ZN281_HUMAN	ZN281_HUMAN	ZNF281	0	0	0.00814846	-0.0276165
sp|Q93045|STMN2_HUMAN	STMN2_HUMAN	STMN2	0	0	0.00871807	-0.0268867
sp|Q15366|PCBP2_HUMAN	PCBP2_HUMAN	PCBP2	2.57212	1.60378	0.0113791	-0.0276512
sp|Q96D71|REPS1_HUMAN	REPS1_HUMAN	REPS1	0	0	0.014712	-0.0279357
sp|Q14331|FRG1_HUMAN	FRG1_HUMAN	FRG1	1.63107	1.27713	0.014203	-0.0512246
sp|P53365|ARFP2_HUMAN	ARFP2_HUMAN	ARFIP2	0	0	0.0184341	-0.0422886
sp|Q9UJF2|NGAP_HUMAN	NGAP_HUMAN	RASAL2	3.81952	1.95436	0.0140236	-0.0614699
sp|Q8NE71|ABCF1_HUMAN	ABCF1_HUMAN	ABCF1	3.7355	1.93274	0.0189942	-0.04898
sp|Q9Y5X1|SNX9_HUMAN	SNX9_HUMAN	SNX9	2.33196	1.52707	0.0167304	-0.0651952
sp|P62280|RS11_HUMAN	RS11_HUMAN	RPS11	3.23669	1.79908	0.0171673	-0.0662734
sp|P81605|DCD_HUMAN	DCD_HUMAN	DCD	5.00751	2.23775	0.019743	-0.0788416
sp|Q6W2J9|BCOR_HUMAN	BCOR_HUMAN	BCOR	0	0	0.0294726	-0.0563238
sp|Q9HDC5|JPH1_HUMAN	JPH1_HUMAN	JPH1	3.31526	1.82079	0.025325	-0.0656527
sp|Q14157|UBP2L_HUMAN	UBP2L_HUMAN	UBAP2L	2.44316	1.56306	0.0211627	-0.0853065
sp|O00483|NDUA4_HUMAN	NDUA4_HUMAN	NDUFA4	1.07902	1.03876	0.0237371	-0.0762487
sp|Q9BWH2|FUND2_HUMAN	FUND2_HUMAN	FUNDC2	2.56632	1.60198	0.0270786	-0.0692111
sp|P68431|H31_HUMAN;sp|Q71DI3|H32_HUMAN;sp|Q16695|H31T_HUMAN;sp|P84243|H33_HUMAN;sp|Q6NXT2|H3C_HUMAN	H31_HUMAN	HIST1H3A	0	0	0.0217903	-0.0884895
sp|Q96HC4|PDLI5_HUMAN	PDLI5_HUMAN	PDLIM5	2.70316	1.64413	0.0244784	-0.0898512
sp|Q8N0V3|RBFA_HUMAN	RBFA_HUMAN	RBFA	1.75798	1.32589	0.0289953	-0.0845657
sp|Q8IWZ3|ANKH1_HUMAN	ANKH1_HUMAN	ANKHD1	3.03117	1.74103	0.0221575	-0.136978
sp|P68363|TBA1B_HUMAN	TBA1B_HUMAN	TUBA1B	6.07646	2.46505	0.0558961	-0.0643138
sp|P49588|SYAC_HUMAN	SYAC_HUMAN	AARS	0	0	0.0339145	-0.0885253
sp|P46781|RS9_HUMAN	RS9_HUMAN	RPS9	2.39021	1.54603	0.0290162	-0.106269
sp|Q92540|SMG7_HUMAN	SMG7_HUMAN	SMG7	1.35857	1.16558	0.030917	-0.107689
sp|Q9UPQ3|AGAP1_HUMAN	AGAP1_HUMAN	AGAP1	0.745356	0.86334	0.0298678	-0.113368
sp|Q99442|SEC62_HUMAN	SEC62_HUMAN	SEC62	1.62125	1.27328	0.0268543	-0.13687
sp|Q96KG9|SCYL1_HUMAN	SCYL1_HUMAN	SCYL1	1.85384	1.36156	0.0342776	-0.106178
sp|Q8WW12|PCNP_HUMAN	PCNP_HUMAN	PCNP	0	0	0.0359726	-0.107092
sp|Q9P2N5|RBM27_HUMAN	RBM27_HUMAN	RBM27	0	0	0.0389489	-0.112262
sp|P22681|CBL_HUMAN	CBL_HUMAN	CBL	1.54559	1.24322	0.0387774	-0.112834
sp|Q86XL3|ANKL2_HUMAN	ANKL2_HUMAN	ANKLE2	1.70359	1.30522	0.0369966	-0.134675
sp|O94991|SLIK5_HUMAN	SLIK5_HUMAN	SLITRK5	1.64778	1.28366	0.0368904	-0.143871
sp|P29966|MARCS_HUMAN	MARCS_HUMAN	MARCKS	1.04367	1.0216	0.0392391	-0.135374
sp|Q9NVU7|SDA1_HUMAN	SDA1_HUMAN	SDAD1	2.20252	1.48409	0.0325586	-0.18123
sp|P10599|THIO_HUMAN	THIO_HUMAN	TXN	0	0	0.0496211	-0.120513
sp|Q6ZUT1|CK057_HUMAN	CK057_HUMAN	NKAPD1	0	0	0.0486957	-0.140701
sp|O43396|TXNL1_HUMAN	TXNL1_HUMAN	TXNL1	0.657389	0.810795	0.0421563	-0.170342
sp|P45880|VDAC2_HUMAN	VDAC2_HUMAN	VDAC2	0	0	0.0413959	-0.17667
sp|Q9Y5A9|YTHD2_HUMAN	YTHD2_HUMAN	YTHDF2	0	0	0.0508167	-0.142826
sp|Q9H6Z4|RANB3_HUMAN	RANB3_HUMAN	RANBP3	1.30125	1.14072	0.0533443	-0.155822
sp|P49454|CENPF_HUMAN	CENPF_HUMAN	CENPF	2.4941	1.57927	0.0495785	-0.180189
sp|Q15208|STK38_HUMAN	STK38_HUMAN	STK38	5.10111	2.25856	0.0515085	-0.182413
sp|O75152|ZC11A_HUMAN	ZC11A_HUMAN	ZC3H11A	1.71668	1.31022	0.0515955	-0.185042
sp|Q9HCC0|MCCB_HUMAN	MCCB_HUMAN	MCCC2	2.73219	1.65293	0.0641948	-0.151541
sp|Q9BPX6|MICU1_HUMAN	MICU1_HUMAN	MICU1	1.69064	1.30024	0.0583935	-0.166808
sp|P35030|TRY3_HUMAN	TRY3_HUMAN	PRSS3	0	0	0.0512465	-0.201851
sp|P49458|SRP09_HUMAN	SRP09_HUMAN	SRP9	2.71241	1.64694	0.0675436	-0.152263
sp|Q96JH7|VCIP1_HUMAN	VCIP1_HUMAN	VCPIP1	3.69733	1.92284	0.0475781	-0.242968
sp|P07305|H10_HUMAN	H10_HUMAN	H1F0	2.16345	1.47087	0.0533052	-0.231762
sp|Q8IY17|PLPL6_HUMAN	PLPL6_HUMAN	PNPLA6	3.3904	1.8413	0.0532535	-0.247214
sp|Q8WYP5|ELYS_HUMAN	ELYS_HUMAN	AHCTF1	0	0	0.0809679	-0.16031
sp|P62241|RS8_HUMAN	RS8_HUMAN	RPS8	4.01717	2.00429	0.105	-0.138551
sp|Q9Y5M8|SRPRB_HUMAN	SRPRB_HUMAN	SRPRB	0.825329	0.908476	0.0571085	-0.238193
sp|Q9UL54|TAOK2_HUMAN	TAOK2_HUMAN	TAOK2	1.61483	1.27076	0.0618778	-0.249483
sp|O43592|XPOT_HUMAN	XPOT_HUMAN	XPOT	0.803609	0.896443	0.0785734	-0.197367
sp|Q7RTP6|MICA3_HUMAN	MICA3_HUMAN	MICAL3	0	0	0.100362	-0.172723
sp|P62273|RS29_HUMAN	RS29_HUMAN	RPS29	3.55363	1.88511	0.0591268	-0.297264
sp|P61254|RL26_HUMAN	RL26_HUMAN	RPL26	5.76501	2.40104	0.106703	-0.171571
sp|Q96AC1|FERM2_HUMAN	FERM2_HUMAN	FERMT2	1.24179	1.11435	0.08121	-0.216055
sp|P62861|RS30_HUMAN	RS30_HUMAN	FAU	4.04188	2.01044	0.100447	-0.184177
sp|O00567|NOP56_HUMAN	NOP56_HUMAN	NOP56	1.31195	1.1454	0.0651128	-0.284982
sp|P35268|RL22_HUMAN	RL22_HUMAN	RPL22	1.04068	1.02014	0.0711232	-0.254364
sp|O95487|SC24B_HUMAN	SC24B_HUMAN	SEC24B	0	0	0.0725175	-0.252733
sp|Q8TCU4|ALMS1_HUMAN	ALMS1_HUMAN	ALMS1	4.95101	2.22509	0.0648432	-0.300191
sp|O75691|UTP20_HUMAN	UTP20_HUMAN	UTP20	5.33684	2.31016	0.0699558	-0.270228
sp|Q14694|UBP10_HUMAN	UBP10_HUMAN	USP10	1.29272	1.13698	0.0782975	-0.245027
sp|O14980|XPO1_HUMAN	XPO1_HUMAN	XPO1	4.37226	2.09099	0.0837947	-0.244716
sp|Q96EA4|SPDLY_HUMAN	SPDLY_HUMAN	SPDL1	2.68761	1.63939	0.0963611	-0.231005
sp|Q9Y2I1|NISCH_HUMAN	NISCH_HUMAN	NISCH	4.29872	2.07333	0.080086	-0.28664
sp|Q2M1Z3|RHG31_HUMAN	RHG31_HUMAN	ARHGAP31	0	0	0.12996	-0.196316
sp|P25398|RS12_HUMAN	RS12_HUMAN	RPS12	0	0	0.0932445	-0.249114
sp|Q13190|STX5_HUMAN	STX5_HUMAN	STX5	2.29016	1.51333	0.0772035	-0.313167
sp|P42695|CNDD3_HUMAN	CNDD3_HUMAN	NCAPD3	0	0	0.0971137	-0.257377
sp|O95372|LYPA2_HUMAN	LYPA2_HUMAN	LYPLA2	3.0947	1.75918	0.0806872	-0.322732
sp|P23381|SYWC_HUMAN	SYWC_HUMAN	WARS	0	0	0.109402	-0.240526
sp|Q9P0L0|VAPA_HUMAN	VAPA_HUMAN	VAPA	0.798491	0.893583	0.0898097	-0.292697
sp|Q9Y450|HBS1L_HUMAN	HBS1L_HUMAN	HBS1L	0.923415	0.960945	0.0896103	-0.317732
sp|Q9Y4W6|AFG32_HUMAN	AFG32_HUMAN	AFG3L2	4.13627	2.03378	0.0899988	-0.316751
sp|Q8IWX8|CHERP_HUMAN	CHERP_HUMAN	CHERP	0	0	0.103182	-0.285544
sp|Q9H0A0|NAT10_HUMAN	NAT10_HUMAN	NAT10	3.00874	1.73457	0.0872747	-0.347482
sp|P08708|RS17_HUMAN	RS17_HUMAN	RPS17	0	0	0.0941569	-0.328395
sp|Q8NEY1|NAV1_HUMAN	NAV1_HUMAN	NAV1	0	0	0.119376	-0.261561
sp|P51149|RAB7A_HUMAN	RAB7A_HUMAN	RAB7A	12.7305	3.56798	0.0866314	-0.378957
sp|P35579|MYH9_HUMAN	MYH9_HUMAN	MYH9	5.77361	2.40283	0.0898394	-0.366364
sp|O95486|SC24A_HUMAN	SC24A_HUMAN	SEC24A	2.68818	1.63957	0.142661	-0.244846
sp|O75683|SURF6_HUMAN	SURF6_HUMAN	SURF6	2.87135	1.69451	0.0858589	-0.409297
sp|O43426|SYNJ1_HUMAN	SYNJ1_HUMAN	SYNJ1	2.33756	1.52891	0.0917138	-0.377516
sp|O15063|K0355_HUMAN	K0355_HUMAN	KIAA0355	0	0	0.0777434	-0.519547
sp|P60842|IF4A1_HUMAN	IF4A1_HUMAN	EIF4A1	1.30769	1.14354	0.10135	-0.338118
sp|Q9Y3C1|NOP16_HUMAN	NOP16_HUMAN	NOP16	0	0	0.105257	-0.324596
sp|Q4VCS5|AMOT_HUMAN	AMOT_HUMAN	AMOT	3.49621	1.86982	0.0822762	-0.470735
sp|O60749|SNX2_HUMAN	SNX2_HUMAN	SNX2	0	0	0.122152	-0.290907
sp|P50416|CPT1A_HUMAN	CPT1A_HUMAN	CPT1A	3.37494	1.8371	0.10038	-0.363855
sp|Q5T6F2|UBAP2_HUMAN	UBAP2_HUMAN	UBAP2	1.75627	1.32524	0.102186	-0.368365
sp|P49327|FAS_HUMAN	FAS_HUMAN	FASN	13.2844	3.64478	0.146353	-0.272745
sp|O60231|DHX16_HUMAN	DHX16_HUMAN	DHX16	0	0	0.141502	-0.282588
sp|P61353|RL27_HUMAN	RL27_HUMAN	RPL27	2.0729	1.43976	0.112604	-0.354347
sp|Q9BQ48|RM34_HUMAN	RM34_HUMAN	MRPL34	1.29522	1.13808	0.107357	-0.383007
sp|Q86TP1|PRUNE_HUMAN	PRUNE_HUMAN	PRUNE1	0	0	0.152506	-0.281967
sp|Q5JSH3|WDR44_HUMAN	WDR44_HUMAN	WDR44	1.21293	1.10133	0.102742	-0.412532
sp|P49257|LMAN1_HUMAN	LMAN1_HUMAN	LMAN1	4.84894	2.20203	0.0966362	-0.459568
sp|Q07065|CKAP4_HUMAN	CKAP4_HUMAN	CKAP4	5.41044	2.32604	0.127429	-0.332772
sp|Q9NZ01|TECR_HUMAN	TECR_HUMAN	TECR	2.01923	1.421	0.10639	-0.440615
sp|Q8N5G2|MACOI_HUMAN	MACOI_HUMAN	MACO1	0	0	0.120179	-0.383299
sp|Q13625|ASPP2_HUMAN	ASPP2_HUMAN	TP53BP2	1.44399	1.20166	0.124071	-0.374981
sp|Q14683|SMC1A_HUMAN	SMC1A_HUMAN	SMC1A	2.06795	1.43804	0.109948	-0.448842
sp|P55060|XPO2_HUMAN	XPO2_HUMAN	CSE1L	0	0	0.128708	-0.373156
sp|P11717|MPRI_HUMAN	MPRI_HUMAN	IGF2R	3.33533	1.82629	0.109862	-0.452401
sp|P62979|RS27A_HUMAN;sp|P0CG47|UBB_HUMAN;sp|P0CG48|UBC_HUMAN	RS27A_HUMAN	RPS27A	4.54666	2.13229	0.276761	-0.243664
sp|Q13206|DDX10_HUMAN	DDX10_HUMAN	DDX10	0	0	0.116317	-0.425679
sp|Q99623|PHB2_HUMAN	PHB2_HUMAN	PHB2	2.50001	1.58114	0.112393	-0.455209
sp|Q14839|CHD4_HUMAN	CHD4_HUMAN	CHD4	1.80489	1.34346	0.113568	-0.455723
sp|Q5C9Z4|NOM1_HUMAN	NOM1_HUMAN	NOM1	3.55485	1.88543	0.137128	-0.371941
sp|Q9P0K7|RAI14_HUMAN	RAI14_HUMAN	RAI14	3.64356	1.90881	0.114	-0.467678
sp|P49790|NU153_HUMAN	NU153_HUMAN	NUP153	0.817578	0.9042	0.105475	-0.538916
sp|P24752|THIL_HUMAN	THIL_HUMAN	ACAT1	1.32368	1.15051	0.127489	-0.413452
sp|Q9NVN8|GNL3L_HUMAN	GNL3L_HUMAN	GNL3L	5.11708	2.2621	0.125151	-0.429431
sp|Q99961|SH3G1_HUMAN	SH3G1_HUMAN	SH3GL1	1.44684	1.20285	0.144841	-0.370417
sp|Q9NVI7|ATD3A_HUMAN	ATD3A_HUMAN	ATAD3A	3.44389	1.85577	0.130532	-0.413547
sp|Q99707|METH_HUMAN	METH_HUMAN	MTR	1.46043	1.20848	0.112937	-0.557544
sp|Q9H6S0|YTDC2_HUMAN	YTDC2_HUMAN	YTHDC2	0	0	0.154557	-0.384527
sp|Q7Z4Q2|HEAT3_HUMAN	HEAT3_HUMAN	HEATR3	2.4791	1.57452	0.192177	-0.330091
sp|Q9BXW9|FACD2_HUMAN	FACD2_HUMAN	FANCD2	1.04211	1.02084	0.148388	-0.403168
sp|Q5JRA6|MIA3_HUMAN	MIA3_HUMAN	MIA3	1.06439	1.03169	0.126786	-0.48231
sp|P38432|COIL_HUMAN	COIL_HUMAN	COIL	0	0	0.17855	-0.35204
sp|Q9H8G2|CAAP1_HUMAN	CAAP1_HUMAN	CAAP1	3.22052	1.79458	0.158126	-0.39035
sp|P25054|APC_HUMAN	APC_HUMAN	APC	0	0	0.188088	-0.344694
sp|P06748|NPM_HUMAN	NPM_HUMAN	NPM1	1.71361	1.30905	0.135491	-0.464392
sp|P61626|LYSC_HUMAN	LYSC_HUMAN	LYZ	0	0	0.134574	-0.473576
sp|Q4KMP7|TB10B_HUMAN	TB10B_HUMAN	TBC1D10B	1.4978	1.22385	0.137165	-0.475893
sp|P62258|1433E_HUMAN	1433E_HUMAN	YWHAE	1.78358	1.33551	0.15027	-0.433294
sp|P61026|RAB10_HUMAN	RAB10_HUMAN	RAB10	2.59519	1.61096	0.122498	-0.57445
sp|P26373|RL13_HUMAN	RL13_HUMAN	RPL13	4.04972	2.01239	0.223569	-0.337339
sp|Q96G28|CFA36_HUMAN	CFA36_HUMAN	CFAP36	0	0	0.251294	-0.321065
sp|P30041|PRDX6_HUMAN	PRDX6_HUMAN	PRDX6	0	0	0.213891	-0.366103
sp|Q9Y2R4|DDX52_HUMAN	DDX52_HUMAN	DDX52	0	0	0.173266	-0.43158
sp|Q05823|RN5A_HUMAN	RN5A_HUMAN	RNASEL	1.52429	1.23462	0.200517	-0.386075
sp|O00213|APBB1_HUMAN	APBB1_HUMAN	APBB1	1.3561	1.16452	0.150289	-0.502634
sp|P21359|NF1_HUMAN	NF1_HUMAN	NF1	0	0	0.205118	-0.394733
sp|Q9Y383|LC7L2_HUMAN	LC7L2_HUMAN	LUC7L2	1.37296	1.17173	0.142722	-0.579693
sp|Q63HN8|RN213_HUMAN	RN213_HUMAN	RNF213	1.1984	1.09472	0.16989	-0.484859
sp|P62249|RS16_HUMAN	RS16_HUMAN	RPS16	4.18736	2.0463	0.278299	-0.353104
sp|P21333|FLNA_HUMAN	FLNA_HUMAN	FLNA	11.5855	3.40375	0.16833	-0.49995
sp|O95757|HS74L_HUMAN	HS74L_HUMAN	HSPA4L	1.16866	1.08105	0.17889	-0.475022
sp|O75147|OBSL1_HUMAN	OBSL1_HUMAN	OBSL1	0	0	0.212873	-0.420614
sp|Q9UQ35|SRRM2_HUMAN	SRRM2_HUMAN	SRRM2	3.92775	1.98186	0.137716	-0.680823
sp|P62854|RS26_HUMAN;sp|Q5JNZ5|RS26L_HUMAN	RS26_HUMAN	RPS26	3.42434	1.8505	0.284222	-0.359469
sp|Q9H6U6|BCAS3_HUMAN	BCAS3_HUMAN	BCAS3	3.04549	1.74513	0.227642	-0.407036
sp|O95292|VAPB_HUMAN	VAPB_HUMAN	VAPB	1.50538	1.22694	0.181966	-0.485573
sp|O95613|PCNT_HUMAN	PCNT_HUMAN	PCNT	2.57659	1.60517	0.144561	-0.643254
sp|Q15311|RBP1_HUMAN	RBP1_HUMAN	RALBP1	1.34402	1.15932	0.156984	-0.572957
sp|Q15637|SF01_HUMAN	SF01_HUMAN	SF1	0	0	0.229505	-0.411081
sp|Q8TDD1|DDX54_HUMAN	DDX54_HUMAN	DDX54	2.90307	1.70384	0.139917	-0.690972
sp|Q9H3S7|PTN23_HUMAN	PTN23_HUMAN	PTPN23	1.30254	1.14129	0.177754	-0.505845
sp|Q96N67|DOCK7_HUMAN	DOCK7_HUMAN	DOCK7	2.10336	1.4503	0.132082	-0.775596
sp|Q96GQ7|DDX27_HUMAN	DDX27_HUMAN	DDX27	1.78768	1.33704	0.153196	-0.605664
sp|Q562F6|SGO2_HUMAN	SGO2_HUMAN	SGO2	2.97699	1.7254	0.14857	-0.638243
sp|Q15648|MED1_HUMAN	MED1_HUMAN	MED1	1.79624	1.34024	0.237288	-0.408284
sp|P83881|RL36A_HUMAN	RL36A_HUMAN	RPL36A	10.3325	3.21443	0.303696	-0.367717
sp|Q7Z6J0|SH3R1_HUMAN	SH3R1_HUMAN	SH3RF1	0	0	0.226977	-0.431508
sp|Q9UPN3|MACF1_HUMAN	MACF1_HUMAN	MACF1	4.01529	2.00382	0.14966	-0.688592
sp|Q15942|ZYX_HUMAN	ZYX_HUMAN	ZYX	1.33027	1.15337	0.19957	-0.499384
sp|O60566|BUB1B_HUMAN	BUB1B_HUMAN	BUB1B	1.39693	1.18192	0.170001	-0.617426
sp|Q96BY7|ATG2B_HUMAN	ATG2B_HUMAN	ATG2B	1.56398	1.25059	0.163072	-0.704755
sp|Q12802|AKP13_HUMAN	AKP13_HUMAN	AKAP13	2.32931	1.52621	0.173761	-0.671104
sp|Q8NC51|PAIRB_HUMAN	PAIRB_HUMAN	SERBP1	0.812581	0.901433	0.180948	-0.643296
sp|Q9NTJ3|SMC4_HUMAN	SMC4_HUMAN	SMC4	1.30474	1.14225	0.163133	-0.755116
sp|Q92878|RAD50_HUMAN	RAD50_HUMAN	RAD50	1.30418	1.14201	0.18337	-0.658839
sp|Q9Y4W2|LAS1L_HUMAN	LAS1L_HUMAN	LAS1L	1.69166	1.30064	0.219535	-0.553915
sp|Q99615|DNJC7_HUMAN	DNJC7_HUMAN	DNAJC7	0.912772	0.955391	0.191802	-0.64461
sp|P18583|SON_HUMAN	SON_HUMAN	SON	5.17839	2.27561	0.262855	-0.496397
sp|O15042|SR140_HUMAN	SR140_HUMAN	U2SURP	0	0	0.201271	-0.626364
sp|Q15233|NONO_HUMAN	NONO_HUMAN	NONO	0	0	0.193067	-0.667111
sp|O95232|LC7L3_HUMAN	LC7L3_HUMAN	LUC7L3	2.85822	1.69063	0.21846	-0.587061
sp|Q13523|PRP4B_HUMAN	PRP4B_HUMAN	PRPF4B	1.26239	1.12356	0.208976	-0.674146
sp|P24928|RPB1_HUMAN	RPB1_HUMAN	POLR2A	2.50964	1.58419	0.190056	-0.780854
sp|P55209|NP1L1_HUMAN	NP1L1_HUMAN	NAP1L1	0	0	0.225817	-0.675208
sp|Q92616|GCN1_HUMAN	GCN1_HUMAN	GCN1	3.30144	1.81699	0.212495	-0.7348
sp|Q96L93|KI16B_HUMAN	KI16B_HUMAN	KIF16B	1.83286	1.35383	0.349007	-0.499602
sp|P51530|DNA2_HUMAN	DNA2_HUMAN	DNA2	0	0	0.341453	-0.513703
sp|P47914|RL29_HUMAN	RL29_HUMAN	RPL29	3.08855	1.75743	0.333466	-0.526166
sp|Q709C8|VP13C_HUMAN	VP13C_HUMAN	VPS13C	3.49487	1.86946	0.190983	-0.927422
sp|Q96D09|GASP2_HUMAN	GASP2_HUMAN	GPRASP2	0	0	0.26429	-0.636926
sp|Q9BVC6|TM109_HUMAN	TM109_HUMAN	TMEM109	0	0	0.297231	-0.582774
sp|P46109|CRKL_HUMAN	CRKL_HUMAN	CRKL	3.40164	1.84435	0.266439	-0.638176
sp|P62913|RL11_HUMAN	RL11_HUMAN	RPL11	2.1544	1.46779	0.299701	-0.583372
sp|P20340|RAB6A_HUMAN	RAB6A_HUMAN	RAB6A	24.1276	4.91198	0.203298	-0.874908
sp|Q9UG63|ABCF2_HUMAN	ABCF2_HUMAN	ABCF2	0	0	0.226409	-0.773084
sp|Q14137|BOP1_HUMAN	BOP1_HUMAN	BOP1	1.56474	1.25089	0.249367	-0.710413
sp|O60884|DNJA2_HUMAN	DNJA2_HUMAN	DNAJA2	0	0	0.283045	-0.652393
sp|P62937|PPIA_HUMAN	PPIA_HUMAN	PPIA	1.47488	1.21445	0.25665	-0.720778
sp|Q9HCM4|E41L5_HUMAN	E41L5_HUMAN	EPB41L5	3.81968	1.9544	0.236839	-0.792096
sp|O75400|PR40A_HUMAN	PR40A_HUMAN	PRPF40A	3.5072	1.87275	0.237772	-0.7937
sp|Q13428|TCOF_HUMAN	TCOF_HUMAN	TCOF1	8.0926	2.84475	0.390493	-0.545707
sp|Q99755|PI51A_HUMAN	PI51A_HUMAN	PIP5K1A	1.07572	1.03717	0.253317	-0.759234
sp|O75179|ANR17_HUMAN	ANR17_HUMAN	ANKRD17	3.96892	1.99221	0.224451	-0.907072
sp|P07737|PROF1_HUMAN	PROF1_HUMAN	PFN1	0	0	0.255071	-0.778963
sp|O75663|TIPRL_HUMAN	TIPRL_HUMAN	TIPRL	2.00088	1.41452	0.255255	-0.787779
sp|Q9UNX3|RL26L_HUMAN	RL26L_HUMAN	RPL26L1	5.51644	2.34871	0.241835	-0.873144
sp|Q09666|AHNK_HUMAN	AHNK_HUMAN	AHNAK	6.3173	2.51342	0.243688	-0.869987
sp|Q8NFA0|UBP32_HUMAN	UBP32_HUMAN	USP32	0	0	0.342084	-0.637179
sp|Q9P035|HACD3_HUMAN	HACD3_HUMAN	HACD3	2.8926	1.70076	0.447576	-0.548933
sp|Q9C0C4|SEM4C_HUMAN	SEM4C_HUMAN	SEMA4C	0	0	0.296786	-0.725499
sp|Q5VT25|MRCKA_HUMAN	MRCKA_HUMAN	CDC42BPA	2.33935	1.52949	0.249667	-0.877477
sp|Q7Z478|DHX29_HUMAN	DHX29_HUMAN	DHX29	1.03882	1.01922	0.252804	-0.867928
sp|P34932|HSP74_HUMAN	HSP74_HUMAN	HSPA4	1.07449	1.03657	0.28223	-0.777546
sp|Q5HYI8|RABL3_HUMAN	RABL3_HUMAN	RABL3	1.55098	1.24538	0.257337	-0.870006
sp|O94906|PRP6_HUMAN	PRP6_HUMAN	PRPF6	1.278	1.13049	0.252884	-0.926606
sp|P52701|MSH6_HUMAN	MSH6_HUMAN	MSH6	1.08881	1.04346	0.277098	-0.847852
sp|P12270|TPR_HUMAN	TPR_HUMAN	TPR	6.8876	2.62442	0.286444	-0.819551
sp|Q86UK7|ZN598_HUMAN	ZN598_HUMAN	ZNF598	2.05789	1.43453	0.287994	-0.81901
sp|Q8TEQ6|GEMI5_HUMAN	GEMI5_HUMAN	GEMIN5	1.23688	1.11215	0.236144	-1.06264
sp|P52292|IMA1_HUMAN	IMA1_HUMAN	KPNA2	0	0	0.316599	-0.75524
sp|P62304|RUXE_HUMAN	RUXE_HUMAN	SNRPE	0	0	0.363672	-0.68075
sp|Q9UM54|MYO6_HUMAN	MYO6_HUMAN	MYO6	0	0	0.287592	-0.843545
sp|P36776|LONM_HUMAN	LONM_HUMAN	LONP1	0	0	0.320432	-0.78084
sp|P62851|RS25_HUMAN	RS25_HUMAN	RPS25	2.12859	1.45897	0.350668	-0.725974
sp|P43487|RANG_HUMAN	RANG_HUMAN	RANBP1	0	0	0.264129	-0.99565
sp|Q93008|USP9X_HUMAN	USP9X_HUMAN	USP9X	1.83457	1.35446	0.349919	-0.750635
sp|Q14315|FLNC_HUMAN	FLNC_HUMAN	FLNC	0	0	0.271119	-0.973807
sp|Q8WWM7|ATX2L_HUMAN	ATX2L_HUMAN	ATXN2L	0.612874	0.782862	0.288581	-0.919812
sp|O94826|TOM70_HUMAN	TOM70_HUMAN	TOMM70	3.23014	1.79726	0.334746	-0.79424
sp|Q3SY69|AL1L2_HUMAN	AL1L2_HUMAN	ALDH1L2	0	0	0.295423	-0.907289
sp|Q14241|ELOA1_HUMAN	ELOA1_HUMAN	ELOA	2.0986	1.44865	0.274086	-1.01592
sp|Q8IWB9|TEX2_HUMAN	TEX2_HUMAN	TEX2	0.907172	0.952456	0.375357	-0.759618
sp|Q9NSE4|SYIM_HUMAN	SYIM_HUMAN	IARS2	3.36347	1.83398	0.269503	-1.07597
sp|Q9UPS8|ANR26_HUMAN	ANR26_HUMAN	ANKRD26	2.19861	1.48277	0.29734	-0.993542
sp|Q86UP2|KTN1_HUMAN	KTN1_HUMAN	KTN1	5.40033	2.32386	0.418144	-0.762376
sp|Q9UPQ9|TNR6B_HUMAN	TNR6B_HUMAN	TNRC6B	1.82148	1.34962	0.405841	-0.778261
sp|Q6UB35|C1TM_HUMAN	C1TM_HUMAN	MTHFD1L	1.04293	1.02124	0.373539	-0.843504
sp|P62263|RS14_HUMAN	RS14_HUMAN	RPS14	2.25803	1.50267	0.352888	-0.887192
sp|Q8IYB3|SRRM1_HUMAN	SRRM1_HUMAN	SRRM1	2.43377	1.56005	0.290316	-1.11414
sp|Q92625|ANS1A_HUMAN	ANS1A_HUMAN	ANKS1A	1.46677	1.2111	0.368015	-0.885307
sp|Q6P1N0|C2D1A_HUMAN	C2D1A_HUMAN	CC2D1A	0	0	0.426257	-0.804199
sp|O43432|IF4G3_HUMAN	IF4G3_HUMAN	EIF4G3	1.58804	1.26018	0.340998	-0.973012
sp|Q9Y467|SALL2_HUMAN	SALL2_HUMAN	SALL2	0	0	0.499194	-0.730846
sp|Q7KZF4|SND1_HUMAN	SND1_HUMAN	SND1	2.25592	1.50197	0.313484	-1.07284
sp|Q9Y4P3|TBL2_HUMAN	TBL2_HUMAN	TBL2	1.01246	1.00621	0.362798	-0.944097
sp|Q15058|KIF14_HUMAN	KIF14_HUMAN	KIF14	1.51125	1.22933	0.283657	-1.2936
sp|O15027|SC16A_HUMAN	SC16A_HUMAN	SEC16A	0.747326	0.86448	0.345601	-1.00644
sp|Q8IZJ1|UNC5B_HUMAN	UNC5B_HUMAN	UNC5B	0.876452	0.93619	0.348785	-0.997532
sp|P23458|JAK1_HUMAN	JAK1_HUMAN	JAK1	0	0	0.357751	-0.973513
sp|Q9NQC3|RTN4_HUMAN	RTN4_HUMAN	RTN4	2.35989	1.53619	0.317651	-1.14687
sp|Q9UBM7|DHCR7_HUMAN	DHCR7_HUMAN	DHCR7	0.677033	0.82282	0.344834	-1.0583
sp|Q9UNF1|MAGD2_HUMAN	MAGD2_HUMAN	MAGED2	1.90063	1.37863	0.356215	-1.02445
sp|P16615|AT2A2_HUMAN	AT2A2_HUMAN	ATP2A2	4.81091	2.19338	0.329667	-1.11893
sp|P55196|AFAD_HUMAN	AFAD_HUMAN	AFDN	8.1913	2.86204	0.315399	-1.20009
sp|Q9NVP1|DDX18_HUMAN	DDX18_HUMAN	DDX18	0.979992	0.989946	0.324028	-1.17635
sp|P46108|CRK_HUMAN	CRK_HUMAN	CRK	3.33131	1.82519	0.423284	-0.898673
sp|Q7Z2K8|GRIN1_HUMAN	GRIN1_HUMAN	GPRIN1	0	0	0.42467	-0.899041
sp|P23528|COF1_HUMAN	COF1_HUMAN	CFL1	0	0	0.3914	-0.971484
sp|Q70E73|RAPH1_HUMAN	RAPH1_HUMAN	RAPH1	1.14381	1.06949	0.364288	-1.04985
sp|P63244|RACK1_HUMAN	RACK1_HUMAN	RACK1	2.22164	1.49052	0.343746	-1.1217
sp|Q96EY4|TMA16_HUMAN	TMA16_HUMAN	TMA16	1.28441	1.13332	0.328037	-1.19517
sp|Q14139|UBE4A_HUMAN	UBE4A_HUMAN	UBE4A	0	0	0.406791	-0.975446
sp|O00443|P3C2A_HUMAN	P3C2A_HUMAN	PIK3C2A	2.22517	1.4917	0.335315	-1.20003
sp|P42566|EPS15_HUMAN	EPS15_HUMAN	EPS15	0	0	0.383514	-1.04342
sp|O75534|CSDE1_HUMAN	CSDE1_HUMAN	CSDE1	2.49774	1.58042	0.324207	-1.31145
sp|Q9P2D1|CHD7_HUMAN	CHD7_HUMAN	CHD7	3.35696	1.8322	0.67295	-0.737264
sp|Q99614|TTC1_HUMAN	TTC1_HUMAN	TTC1	0	0	0.404172	-1.0445
sp|Q6P996|PDXD1_HUMAN	PDXD1_HUMAN	PDXDC1	0.825879	0.908779	0.385338	-1.09774
sp|P61978|HNRPK_HUMAN	HNRPK_HUMAN	HNRNPK	1.75732	1.32564	0.3939	-1.08461
sp|Q6GYQ0|RGPA1_HUMAN	RGPA1_HUMAN	RALGAPA1	0	0	0.480027	-0.93831
sp|A5YKK6|CNOT1_HUMAN	CNOT1_HUMAN	CNOT1	0.988528	0.994248	0.430097	-1.02778
sp|P53007|TXTP_HUMAN	TXTP_HUMAN	SLC25A1	1.22265	1.10574	0.409863	-1.08517
sp|Q8IVF2|AHNK2_HUMAN	AHNK2_HUMAN	AHNAK2	1.10203	1.04978	0.32903	-1.42334
sp|Q96HY6|DDRGK_HUMAN	DDRGK_HUMAN	DDRGK1	0	0	0.442898	-1.01196
sp|Q16850|CP51A_HUMAN	CP51A_HUMAN	CYP51A1	0	0	0.67736	-0.79206
sp|Q8N3C0|ASCC3_HUMAN	ASCC3_HUMAN	ASCC3	0.986091	0.993021	0.380856	-1.20879
sp|O75533|SF3B1_HUMAN	SF3B1_HUMAN	SF3B1	0	0	0.473419	-1.00809
sp|P27708|PYR1_HUMAN	PYR1_HUMAN	CAD	0.720766	0.848979	0.421519	-1.12141
sp|Q7Z7G8|VP13B_HUMAN	VP13B_HUMAN	VPS13B	1.32312	1.15027	0.428812	-1.10476
sp|Q02790|FKBP4_HUMAN	FKBP4_HUMAN	FKBP4	0	0	0.443314	-1.08493
sp|Q08188|TGM3_HUMAN	TGM3_HUMAN	TGM3	0	0	0.736787	-0.794249
sp|Q9Y520|PRC2C_HUMAN	PRC2C_HUMAN	PRRC2C	1.9587	1.39954	0.33928	-1.51727
sp|P55884|EIF3B_HUMAN	EIF3B_HUMAN	EIF3B	0	0	0.869713	-0.752482
sp|Q9Y2Z0|SGT1_HUMAN	SGT1_HUMAN	SUGT1	0.6742	0.821097	0.420481	-1.19782
sp|Q12959|DLG1_HUMAN	DLG1_HUMAN	DLG1	0.897528	0.94738	0.485289	-1.07316
sp|P42167|LAP2B_HUMAN	LAP2B_HUMAN	TMPO	3.33773	1.82695	0.626263	-0.918113
sp|Q9BSJ8|ESYT1_HUMAN	ESYT1_HUMAN	ESYT1	3.14607	1.77372	0.398029	-1.3466
sp|P18564|ITB6_HUMAN	ITB6_HUMAN	ITGB6	0	0	0.426456	-1.24921
sp|Q9NW68|BSDC1_HUMAN	BSDC1_HUMAN	BSDC1	0	0	0.784047	-0.837344
sp|Q9H5V9|CX056_HUMAN	CX056_HUMAN	CXorf56	0	0	0.447958	-1.2744
sp|Q7Z6Z7|HUWE1_HUMAN	HUWE1_HUMAN	HUWE1	1.81303	1.34649	0.402127	-1.47995
sp|Q9Y385|UB2J1_HUMAN	UB2J1_HUMAN	UBE2J1	0.784254	0.885581	0.472282	-1.2366
sp|P62269|RS18_HUMAN	RS18_HUMAN	RPS18	2.73015	1.65232	0.531192	-1.12089
sp|Q5HYK7|SH319_HUMAN	SH319_HUMAN	SH3D19	0	0	0.530696	-1.15494
sp|Q9GZR7|DDX24_HUMAN	DDX24_HUMAN	DDX24	4.64575	2.1554	0.436826	-1.42365
sp|O15294|OGT1_HUMAN	OGT1_HUMAN	OGT	1.37078	1.1708	0.551746	-1.15294
sp|P60866|RS20_HUMAN	RS20_HUMAN	RPS20	1.37353	1.17198	0.460957	-1.36877
sp|O14776|TCRG1_HUMAN	TCRG1_HUMAN	TCERG1	0	0	0.56851	-1.14482
sp|O60841|IF2P_HUMAN	IF2P_HUMAN	EIF5B	3.40536	1.84536	0.489206	-1.31046
sp|Q96A33|CCD47_HUMAN	CCD47_HUMAN	CCDC47	2.23559	1.49519	0.461368	-1.39611
sp|Q9Y2K1|ZBTB1_HUMAN	ZBTB1_HUMAN	ZBTB1	0	0	1.06124	-0.850117
sp|P19338|NUCL_HUMAN	NUCL_HUMAN	NCL	2.10249	1.45	0.459873	-1.46561
sp|Q9H6T3|RPAP3_HUMAN	RPAP3_HUMAN	RPAP3	1.3756	1.17286	0.459439	-1.47686
sp|Q9Y266|NUDC_HUMAN	NUDC_HUMAN	NUDC	3.00675	1.734	0.689014	-1.07786
sp|P40616|ARL1_HUMAN	ARL1_HUMAN	ARL1	0	0	0.638265	-1.13329
sp|P36873|PP1G_HUMAN;sp|P62136|PP1A_HUMAN	PP1G_HUMAN	PPP1CC	0	0	0.875156	-0.95958
sp|Q14160|SCRIB_HUMAN	SCRIB_HUMAN	SCRIB	0	0	0.475829	-1.49272
sp|P35658|NU214_HUMAN	NU214_HUMAN	NUP214	0	0	0.560076	-1.28101
sp|Q2NKX8|ERC6L_HUMAN	ERC6L_HUMAN	ERCC6L	1.12407	1.06022	0.470662	-1.57341
sp|P43121|MUC18_HUMAN	MUC18_HUMAN	MCAM	0	0	0.638077	-1.18775
sp|Q8TEU7|RPGF6_HUMAN	RPGF6_HUMAN	RAPGEF6	1.16059	1.07731	0.476949	-1.58493
sp|Q9NU22|MDN1_HUMAN	MDN1_HUMAN	MDN1	3.48151	1.86588	0.451673	-1.71062
sp|P07814|SYEP_HUMAN	SYEP_HUMAN	EPRS	1.08823	1.04318	0.511323	-1.47977
sp|O95573|ACSL3_HUMAN	ACSL3_HUMAN	ACSL3	0.825245	0.90843	0.515843	-1.4707
sp|P50502|F10A1_HUMAN;sp|Q8NFI4|F10A5_HUMAN;sp|Q8IZP2|ST134_HUMAN	F10A1_HUMAN	ST13	1.17706	1.08492	0.522213	-1.49098
sp|Q8IWC1|MA7D3_HUMAN	MA7D3_HUMAN	MAP7D3	0.641642	0.801025	0.524168	-1.48805
sp|P27816|MAP4_HUMAN	MAP4_HUMAN	MAP4	3.21605	1.79333	0.48035	-1.67798
sp|Q9BXF6|RFIP5_HUMAN	RFIP5_HUMAN	RAB11FIP5	0.629982	0.793714	0.523454	-1.5247
sp|P38646|GRP75_HUMAN	GRP75_HUMAN	HSPA9	0.971175	0.985482	0.495347	-1.64849
sp|Q9C0C9|UBE2O_HUMAN	UBE2O_HUMAN	UBE2O	0	0	0.601513	-1.35813
sp|P11142|HSP7C_HUMAN	HSP7C_HUMAN	HSPA8	3.69432	1.92206	0.565978	-1.44532
sp|Q8WXH0|SYNE2_HUMAN	SYNE2_HUMAN	SYNE2	4.38425	2.09386	0.435102	-2.06246
sp|P05141|ADT2_HUMAN	ADT2_HUMAN	SLC25A5	4.3035	2.07449	1.1034	-0.978784
sp|Q5UIP0|RIF1_HUMAN	RIF1_HUMAN	RIF1	0	0	0.725847	-1.21566
sp|P05556|ITB1_HUMAN	ITB1_HUMAN	ITGB1	0.749833	0.865929	0.504916	-1.69228
sp|Q02952|AKA12_HUMAN	AKA12_HUMAN	AKAP12	2.2507	1.50023	0.502644	-1.72472
sp|P63261|ACTG_HUMAN;sp|P60709|ACTB_HUMAN	ACTG_HUMAN	ACTG1	3.33826	1.82709	0.729108	-1.24157
sp|P55036|PSMD4_HUMAN	PSMD4_HUMAN	PSMD4	0	0	0.514848	-1.76266
sp|P62244|RS15A_HUMAN	RS15A_HUMAN	RPS15A	1.02214	1.01101	0.570089	-1.56706
sp|Q9C0D5|TANC1_HUMAN	TANC1_HUMAN	TANC1	0	0	0.655111	-1.42199
sp|Q04637|IF4G1_HUMAN	IF4G1_HUMAN	EIF4G1	4.5385	2.13038	0.51451	-1.84562
sp|O75116|ROCK2_HUMAN	ROCK2_HUMAN	ROCK2	1.72115	1.31193	0.63886	-1.4783
sp|B2RTY4|MYO9A_HUMAN	MYO9A_HUMAN	MYO9A	1.17076	1.08202	0.616021	-1.53313
sp|O75113|N4BP1_HUMAN	N4BP1_HUMAN	N4BP1	1.39527	1.18122	0.544813	-1.75155
sp|P42704|LPPRC_HUMAN	LPPRC_HUMAN	LRPPRC	2.51466	1.58577	0.513456	-1.90235
sp|P35611|ADDA_HUMAN	ADDA_HUMAN	ADD1	0	0	0.627277	-1.54561
sp|Q9UKJ3|GPTC8_HUMAN	GPTC8_HUMAN	GPATCH8	2.02625	1.42346	0.951546	-1.16391
sp|O95819|M4K4_HUMAN	M4K4_HUMAN	MAP4K4	1.30721	1.14333	0.592247	-1.64921
sp|Q02487|DSC2_HUMAN	DSC2_HUMAN	DSC2	1.7562	1.32522	0.815693	-1.27056
sp|Q14739|LBR_HUMAN	LBR_HUMAN	LBR	3.95697	1.98921	0.664007	-1.48406
sp|P53804|TTC3_HUMAN	TTC3_HUMAN	TTC3	0	0	0.610463	-1.61789
sp|Q02040|AK17A_HUMAN	AK17A_HUMAN	AKAP17A	2.05882	1.43486	0.587253	-1.81986
sp|O43491|E41L2_HUMAN	E41L2_HUMAN	EPB41L2	3.4302	1.85208	0.64858	-1.65526
sp|P46778|RL21_HUMAN	RL21_HUMAN	RPL21	0	0	0.679519	-1.61769
sp|Q8IYU8|MICU2_HUMAN	MICU2_HUMAN	MICU2	0	0	0.875354	-1.33997
sp|Q8NI27|THOC2_HUMAN	THOC2_HUMAN	THOC2	1.50566	1.22705	0.617799	-1.80696
sp|Q9H3N1|TMX1_HUMAN	TMX1_HUMAN	TMX1	0.646545	0.80408	0.595177	-1.90442
sp|P17066|HSP76_HUMAN	HSP76_HUMAN	HSPA6	0	0	0.864489	-1.38591
sp|Q9NNW5|WDR6_HUMAN	WDR6_HUMAN	WDR6	0	0	0.679613	-1.67723
sp|Q6PCB5|RSBNL_HUMAN	RSBNL_HUMAN	RSBN1L	0.773648	0.879572	0.695078	-1.64232
sp|Q9Y2U8|MAN1_HUMAN	MAN1_HUMAN	LEMD3	0.877472	0.936735	0.6401	-1.79775
sp|Q6P2Q9|PRP8_HUMAN	PRP8_HUMAN	PRPF8	0	0	0.718877	-1.62826
sp|Q9NRY4|RHG35_HUMAN	RHG35_HUMAN	ARHGAP35	0	0	0.677766	-1.72349
sp|O14654|IRS4_HUMAN	IRS4_HUMAN	IRS4	4.08446	2.02101	0.555066	-2.30009
sp|Q5VZ89|DEN4C_HUMAN	DEN4C_HUMAN	DENND4C	1.64867	1.28401	0.643158	-1.91375
sp|O94842|TOX4_HUMAN	TOX4_HUMAN	TOX4	0.819294	0.905149	0.619122	-2.04203
sp|O60343|TBCD4_HUMAN	TBCD4_HUMAN	TBC1D4	0	0	0.818316	-1.56319
sp|O95248|MTMR5_HUMAN	MTMR5_HUMAN	SBF1	1.78114	1.3346	0.63287	-2.02595
sp|P42356|PI4KA_HUMAN	PI4KA_HUMAN	PI4KA	1.43279	1.19699	0.989501	-1.4066
sp|Q9Y6M5|ZNT1_HUMAN	ZNT1_HUMAN	SLC30A1	0	0	0.896814	-1.50183
sp|P05023|AT1A1_HUMAN	AT1A1_HUMAN	ATP1A1	2.88519	1.69858	0.709381	-1.83963
sp|Q9UPP1|PHF8_HUMAN	PHF8_HUMAN	PHF8	0	0	0.851843	-1.56927
sp|P53621|COPA_HUMAN	COPA_HUMAN	COPA	0	0	0.920508	-1.49723
sp|O95202|LETM1_HUMAN	LETM1_HUMAN	LETM1	2.54313	1.59472	0.649539	-2.06924
sp|Q99733|NP1L4_HUMAN	NP1L4_HUMAN	NAP1L4	0	0	0.845236	-1.61564
sp|E9PRG8|CK098_HUMAN	CK098_HUMAN	C11orf98	3.74064	1.93407	0.880883	-1.58769
sp|Q9Y2J2|E41L3_HUMAN	E41L3_HUMAN	EPB41L3	2.03061	1.42499	0.767836	-1.81355
sp|Q86YS7|C2CD5_HUMAN	C2CD5_HUMAN	C2CD5	0	0	0.779263	-1.79333
sp|Q8NEN9|PDZD8_HUMAN	PDZD8_HUMAN	PDZD8	0.808249	0.899027	0.667208	-2.13739
sp|P46821|MAP1B_HUMAN	MAP1B_HUMAN	MAP1B	0.929955	0.964342	0.660586	-2.22522
sp|P50990|TCPQ_HUMAN	TCPQ_HUMAN	CCT8	7.1426	2.67256	1.14605	-1.41671
sp|P56192|SYMC_HUMAN	SYMC_HUMAN	MARS	0	0	0.958064	-1.58104
sp|P07900|HS90A_HUMAN	HS90A_HUMAN	HSP90AA1	1.22474	1.10668	0.710652	-2.06611
sp|Q13427|PPIG_HUMAN	PPIG_HUMAN	PPIG	0	0	0.764057	-1.9152
sp|Q7LBC6|KDM3B_HUMAN	KDM3B_HUMAN	KDM3B	0	0	1.07975	-1.47622
sp|P0DMV9|HS71B_HUMAN;sp|P0DMV8|HS71A_HUMAN	HS71B_HUMAN	HSPA1B	0	0	1.01241	-1.53545
sp|P42694|HELZ_HUMAN	HELZ_HUMAN	HELZ	0.970599	0.98519	0.830703	-1.78173
sp|P43307|SSRA_HUMAN	SSRA_HUMAN	SSR1	0	0	0.690099	-2.15806
sp|Q9Y3P9|RBGP1_HUMAN	RBGP1_HUMAN	RABGAP1	1.75537	1.3249	0.866951	-1.75652
sp|P11021|GRP78_HUMAN	GRP78_HUMAN	HSPA5	1.26384	1.12421	0.756563	-2.00861
sp|Q96S66|CLCC1_HUMAN	CLCC1_HUMAN	CLCC1	0.870388	0.932946	0.734471	-2.08566
sp|Q8NG31|KNL1_HUMAN	KNL1_HUMAN	KNL1	0	0	0.701305	-2.20754
sp|Q14C86|GAPD1_HUMAN	GAPD1_HUMAN	GAPVD1	2.11166	1.45315	0.659649	-2.40741
sp|Q6WKZ4|RFIP1_HUMAN	RFIP1_HUMAN	RAB11FIP1	2.41469	1.55393	0.754731	-2.05775
sp|Q15758|AAAT_HUMAN	AAAT_HUMAN	#N/A	1.94252	1.39374	0.995474	-1.62676
sp|Q9HB71|CYBP_HUMAN	CYBP_HUMAN	CACYBP	0.968864	0.984309	0.774205	-2.03599
sp|P12236|ADT3_HUMAN	ADT3_HUMAN	SLC25A6	1.61971	1.27268	0.95027	-1.73693
sp|Q9H7Z3|NRDE2_HUMAN	NRDE2_HUMAN	NRDE2	0.836785	0.914759	0.800329	-2.09335
sp|Q14126|DSG2_HUMAN	DSG2_HUMAN	DSG2	0.960147	0.979871	0.866396	-1.96106
sp|Q9P2E9|RRBP1_HUMAN	RRBP1_HUMAN	RRBP1	0.784928	0.885961	0.670085	-2.74642
sp|O75915|PRAF3_HUMAN	PRAF3_HUMAN	ARL6IP5	0	0	0.958781	-1.87607
sp|Q8N5K1|CISD2_HUMAN	CISD2_HUMAN	CISD2	0	0	0.906426	-2.08678
sp|A0FGR8|ESYT2_HUMAN	ESYT2_HUMAN	ESYT2	1.31094	1.14496	0.947552	-2.02849
sp|Q9Y2H6|FND3A_HUMAN	FND3A_HUMAN	FNDC3A	0.68313	0.826517	0.808308	-2.40715
sp|Q13823|NOG2_HUMAN	NOG2_HUMAN	GNL2	0	0	0.888534	-2.18625
sp|Q5SW79|CE170_HUMAN	CE170_HUMAN	CEP170	1.00526	1.00263	0.769378	-2.60972
sp|Q86UE4|LYRIC_HUMAN	LYRIC_HUMAN	MTDH	1.21244	1.10111	0.998086	-2.08464
sp|Q9H3U1|UN45A_HUMAN	UN45A_HUMAN	UNC45A	2.4135	1.55355	0.846186	-2.58152
sp|Q9Y6M7|S4A7_HUMAN	S4A7_HUMAN	SLC4A7	0.588811	0.76734	0.908022	-2.43601
sp|Q13586|STIM1_HUMAN	STIM1_HUMAN	STIM1	0.835107	0.913842	0.906211	-2.4471
sp|O15173|PGRC2_HUMAN	PGRC2_HUMAN	PGRMC2	2.4368	1.56103	1.84158	-1.56291
sp|P30876|RPB2_HUMAN	RPB2_HUMAN	POLR2B	0	0	1.01466	-2.37123
sp|P50402|EMD_HUMAN	EMD_HUMAN	EMD	1.32674	1.15184	1.2274	-2.0767
sp|Q9ULM3|YETS2_HUMAN	YETS2_HUMAN	YEATS2	0	0	1.00379	-2.64947
sp|Q00839|HNRPU_HUMAN	HNRPU_HUMAN	HNRNPU	0.748404	0.865103	1.1377	-2.34395
sp|P49411|EFTU_HUMAN	EFTU_HUMAN	TUFM	2.20081	1.48351	1.38673	-2.21182
sp|O75592|MYCB2_HUMAN	MYCB2_HUMAN	MYCBP2	0	0	1.06154	-2.82659
sp|O95831|AIFM1_HUMAN	AIFM1_HUMAN	AIFM1	0	0	1.37904	-2.27894
sp|Q13459|MYO9B_HUMAN	MYO9B_HUMAN	MYO9B	2.31001	1.51987	1.12325	-2.84989
sp|Q92598|HS105_HUMAN	HS105_HUMAN	HSPH1	0.870388	0.932946	1.10509	-3.28955
sp|P16949|STMN1_HUMAN	STMN1_HUMAN	STMN1	2.60214	1.61311	1.54834	-2.52165
sp|P17987|TCPA_HUMAN	TCPA_HUMAN	TCP1	1.25136	1.11864	1.31008	-2.9548
sp|P46939|UTRO_HUMAN	UTRO_HUMAN	UTRN	2.38763	1.54519	1.10936	-3.92235
sp|P08195|4F2_HUMAN	4F2_HUMAN	#N/A	3.56388	1.88782	2.40495	-2.1352
sp|Q5JTV8|TOIP1_HUMAN	TOIP1_HUMAN	TOR1AIP1	1.67341	1.2936	1.74424	-2.61008
sp|P08238|HS90B_HUMAN	HS90B_HUMAN	HSP90AB1	3.75299	1.93726	2.37152	-2.18688
sp|Q15836|VAMP3_HUMAN	VAMP3_HUMAN	VAMP3	0.603219	0.776672	1.67734	-2.9018
sp|P55011|S12A2_HUMAN	S12A2_HUMAN	SLC12A2	2.21697	1.48895	2.23305	-2.42808
sp|P11171|41_HUMAN	41_HUMAN	#N/A	2.60708	1.61464	1.48028	-3.3119
sp|Q9HCU5|PREB_HUMAN	PREB_HUMAN	PREB	1.55436	1.24674	1.64363	-3.18664
sp|Q14980|NUMA1_HUMAN	NUMA1_HUMAN	NUMA1	0.712728	0.844232	1.46136	-3.70443
sp|Q9HCK8|CHD8_HUMAN	CHD8_HUMAN	CHD8	1.0295	1.01464	1.55096	-4.7909
sp|Q01650|LAT1_HUMAN	LAT1_HUMAN	SLC7A5	0.533435	0.730366	2.3039	-4.29466
sp|Q8WVS4|WDR60_HUMAN	WDR60_HUMAN	WDR60	0.912871	0.955443	2.37178	-4.28575
sp|P51610|HCFC1_HUMAN	HCFC1_HUMAN	HCFC1	0	0	2.40115	-5.08288
sp|Q9H2J7|S6A15_HUMAN	S6A15_HUMAN	SLC6A15	2.49145	1.57843	3.92204	-3.93464

## Sheet: Rab2 SN
Majority protein IDs	Uniprot	Gene NAME	WD score	Root WD score	Log Student's T-test p-value Rab2 SN	Student's T-test Difference Rab2SN
sp|P61019|RAB2A_HUMAN	RAB2A_HUMAN	RAB2A	11409.4	106.815	30.0945	15.4368
sp|Q2KHT3|CL16A_HUMAN	CL16A_HUMAN	CLEC16A	2918.83	54.0262	14.6663	5.34095
sp|Q9H0T7|RAB17_HUMAN	RAB17_HUMAN	#N/A	#N/A	#N/A	12.3629	4.83062
sp|Q3MII6|TBC25_HUMAN	TBC25_HUMAN	TBC1D25	1813.53	42.5856	9.5025	5.30895
sp|Q7Z7A1|CNTRL_HUMAN	CNTRL_HUMAN	CNTRL	0	0	4.57538	2.47094
sp|P05141|ADT2_HUMAN	ADT2_HUMAN	SLC25A5	4.19429	2.048	3.26142	-1.82407
sp|Q13459|MYO9B_HUMAN	MYO9B_HUMAN	MYO9B	1.98864	1.41019	3.00138	-5.05147
sp|Q5SQN1|SNP47_HUMAN	SNP47_HUMAN	SNAP47	59.1109	7.68836	2.8297	3.73707
sp|Q86TP1|PRUNE_HUMAN	PRUNE_HUMAN	PRUNE1	2.7559	1.66009	2.7464	2.17802
sp|Q96AG3|S2546_HUMAN	S2546_HUMAN	SLC25A46	58.5069	7.64898	2.69426	3.39206
sp|Q05655|KPCD_HUMAN	KPCD_HUMAN	PRKCD	15.4238	3.92731	2.41288	2.70687
sp|Q96LT7|CI072_HUMAN	CI072_HUMAN	C9orf72	2.90448	1.70425	2.39756	2.04907
sp|Q96AQ6|PBIP1_HUMAN	PBIP1_HUMAN	PBXIP1	8.93063	2.98842	2.36359	2.00356
sp|O60763|USO1_HUMAN	USO1_HUMAN	USO1	17.6624	4.20267	2.34248	2.31634
sp|Q9NRY5|F1142_HUMAN	F1142_HUMAN	FAM114A2	40.9537	6.39951	2.34226	3.79698
sp|P16403|H12_HUMAN	H12_HUMAN	HIST1H1C	47.337	6.88019	2.29629	4.38334
sp|O15173|PGRC2_HUMAN	PGRC2_HUMAN	PGRMC2	2.8671	1.69325	2.2555	-1.68499
sp|Q8NF37|PCAT1_HUMAN	PCAT1_HUMAN	LPCAT1	0	0	2.25304	1.65906
sp|Q9UGI8|TES_HUMAN	TES_HUMAN	TES	4.86298	2.20522	2.23811	1.63313
sp|O95219|SNX4_HUMAN	SNX4_HUMAN	SNX4	2.26319	1.50439	2.23152	1.51362
sp|O43399|TPD54_HUMAN	TPD54_HUMAN	TPD52L2	2.76356	1.66239	2.20422	1.94367
sp|Q5VT66|MARC1_HUMAN	MARC1_HUMAN	MARC1	13.2427	3.63906	2.18929	3.3328
sp|P08238|HS90B_HUMAN	HS90B_HUMAN	HSP90AB1	4.28121	2.06911	2.17094	-1.9751
sp|O75616|ERAL1_HUMAN	ERAL1_HUMAN	ERAL1	3.39848	1.8435	2.09271	2.17276
sp|Q8NBF6|AVL9_HUMAN	AVL9_HUMAN	AVL9	25.6937	5.06889	2.05313	1.80814
sp|O94762|RECQ5_HUMAN	RECQ5_HUMAN	#N/A	#N/A	#N/A	1.98664	4.37593
sp|Q8IWJ2|GCC2_HUMAN	GCC2_HUMAN	GCC2	18.4655	4.29715	1.97737	5.17047
sp|Q6P444|MTFR2_HUMAN	MTFR2_HUMAN	MTFR2	30.9697	5.56505	1.9435	2.66002
sp|P17987|TCPA_HUMAN	TCPA_HUMAN	TCP1	0	0	1.92453	-3.78591
sp|P50747|BPL1_HUMAN	BPL1_HUMAN	HLCS	9.16834	3.02793	1.79639	3.12003
sp|O00429|DNM1L_HUMAN	DNM1L_HUMAN	DNM1L	10.5298	3.24497	1.78875	2.05092
sp|P19338|NUCL_HUMAN	NUCL_HUMAN	NCL	0.546942	0.739555	1.75822	-3.66958
sp|Q8IXI1|MIRO2_HUMAN	MIRO2_HUMAN	RHOT2	5.08868	2.25581	1.74125	3.04215
sp|O60238|BNI3L_HUMAN	BNI3L_HUMAN	BNIP3L	9.73742	3.12048	1.72526	1.86611
sp|Q12983|BNIP3_HUMAN	BNIP3_HUMAN	BNIP3	5.27838	2.29747	1.7214	2.28486
sp|Q9UID3|VPS51_HUMAN	VPS51_HUMAN	VPS51	0	0	1.69588	-1.23238
sp|Q9UQN3|CHM2B_HUMAN	CHM2B_HUMAN	CHMP2B	1.55098	1.24538	1.66609	3.00993
sp|Q9Y217|MTMR6_HUMAN	MTMR6_HUMAN	MTMR6	0	0	1.64826	1.82482
sp|P60866|RS20_HUMAN	RS20_HUMAN	RPS20	0.63427	0.796411	1.63881	-3.16371
sp|Q14145|KEAP1_HUMAN	KEAP1_HUMAN	KEAP1	140.779	11.865	1.62954	1.73974
sp|P31948|STIP1_HUMAN	STIP1_HUMAN	STIP1	1.02558	1.01271	1.59809	-3.81584
sp|Q9NVH0|EXD2_HUMAN	EXD2_HUMAN	EXD2	6.86708	2.62051	1.5979	1.3889
sp|P42695|CNDD3_HUMAN	CNDD3_HUMAN	NCAPD3	2.79743	1.67255	1.56595	1.94242
sp|P53621|COPA_HUMAN	COPA_HUMAN	COPA	0	0	1.53432	-2.22023
sp|Q99615|DNJC7_HUMAN	DNJC7_HUMAN	DNAJC7	1.11791	1.05731	1.5236	-2.78476
sp|Q658Y4|F91A1_HUMAN	F91A1_HUMAN	FAM91A1	10.6105	3.25738	1.52075	3.45829
sp|P11142|HSP7C_HUMAN	HSP7C_HUMAN	HSPA8	4.02032	2.00507	1.49416	-2.68962
sp|Q9NQG6|MID51_HUMAN	MID51_HUMAN	MIEF1	10.2521	3.20189	1.4876	2.46285
sp|Q96L91|EP400_HUMAN	EP400_HUMAN	EP400	0	0	1.46814	1.07068
sp|P50990|TCPQ_HUMAN	TCPQ_HUMAN	CCT8	6.68816	2.58615	1.43386	-1.62628
sp|Q9NVI7|ATD3A_HUMAN	ATD3A_HUMAN	ATAD3A	2.44301	1.56301	1.42102	-2.56885
sp|P20340|RAB6A_HUMAN	RAB6A_HUMAN	RAB6A	5.92722	2.43459	1.40722	-3.64337
sp|P29966|MARCS_HUMAN	MARCS_HUMAN	MARCKS	12.6993	3.5636	1.38045	2.36437
sp|O94822|LTN1_HUMAN	LTN1_HUMAN	LTN1	8.79407	2.96548	1.3649	2.48188
sp|Q9HCL2|GPAT1_HUMAN	GPAT1_HUMAN	GPAM	9.50262	3.08263	1.35501	2.78382
sp|P12236|ADT3_HUMAN	ADT3_HUMAN	SLC25A6	2.83863	1.68482	1.33588	-2.26875
sp|Q99439|CNN2_HUMAN	CNN2_HUMAN	CNN2	0	0	1.32189	1.93201
sp|Q8N6T3|ARFG1_HUMAN	ARFG1_HUMAN	ARFGAP1	3.95248	1.98808	1.29155	2.44539
sp|Q27J81|INF2_HUMAN	INF2_HUMAN	INF2	0	0	1.28163	1.18763
sp|Q14980|NUMA1_HUMAN	NUMA1_HUMAN	NUMA1	1.59824	1.26422	1.27729	-3.35884
sp|P0DMV9|HS71B_HUMAN;sp|P0DMV8|HS71A_HUMAN	HS71B_HUMAN	HSPA1B	0	0	1.27415	-1.75508
sp|P17066|HSP76_HUMAN	HSP76_HUMAN	HSPA6	0	0	1.26953	-1.79385
sp|Q14126|DSG2_HUMAN	DSG2_HUMAN	DSG2	0	0	1.26858	-2.5621
sp|Q8WUX9|CHMP7_HUMAN	CHMP7_HUMAN	CHMP7	25.1943	5.01939	1.25634	1.90143
sp|Q6WCQ1|MPRIP_HUMAN	MPRIP_HUMAN	MPRIP	0	0	1.24529	1.54894
sp|Q92997|DVL3_HUMAN	DVL3_HUMAN	DVL3	5.5353	2.35272	1.21918	2.80938
sp|Q96EB1|ELP4_HUMAN	ELP4_HUMAN	ELP4	2.27124	1.50706	1.19877	1.5169
sp|P07900|HS90A_HUMAN	HS90A_HUMAN	HSP90AA1	1.22474	1.10668	1.19555	-2.80252
sp|Q5T280|CI114_HUMAN	CI114_HUMAN	SPOUT1	4.41655	2.10156	1.19012	1.76221
sp|P84157|MXRA7_HUMAN	MXRA7_HUMAN	MXRA7	30.0287	5.47984	1.19009	1.79791
sp|Q9UH92|MLX_HUMAN	MLX_HUMAN	MLX	3.62244	1.90327	1.18302	1.4872
sp|P46778|RL21_HUMAN	RL21_HUMAN	RPL21	0.932665	0.965746	1.17367	-2.39096
sp|Q9H8Y8|GORS2_HUMAN	GORS2_HUMAN	GORASP2	3.51015	1.87354	1.17354	2.55308
sp|P46020|KPB1_HUMAN	KPB1_HUMAN	PHKA1	0	0	1.17244	1.08196
sp|Q8NAN2|MIGA1_HUMAN	MIGA1_HUMAN	MIGA1	6.16284	2.48251	1.1719	3.47025
sp|P52594|AGFG1_HUMAN	AGFG1_HUMAN	AGFG1	2.71337	1.64723	1.17144	1.84011
sp|P24723|KPCL_HUMAN	KPCL_HUMAN	PRKCH	18.9379	4.35177	1.16944	1.0032
sp|Q9ULH0|KDIS_HUMAN	KDIS_HUMAN	KIDINS220	3.54006	1.8815	1.15749	1.05737
sp|Q9P246|STIM2_HUMAN	STIM2_HUMAN	STIM2	2.90746	1.70513	1.15699	1.38233
sp|O75962|TRIO_HUMAN	TRIO_HUMAN	TRIO	3.36867	1.83539	1.15532	1.37404
sp|P78318|IGBP1_HUMAN	IGBP1_HUMAN	IGBP1	3.93105	1.98269	1.15326	1.33562
sp|Q8WXE0|CSKI2_HUMAN	CSKI2_HUMAN	CASKIN2	0	0	1.14773	-1.07542
sp|Q9HB21|PKHA1_HUMAN	PKHA1_HUMAN	PLEKHA1	2.69861	1.64275	1.14485	1.23486
sp|Q9NTK5|OLA1_HUMAN	OLA1_HUMAN	OLA1	0	0	1.14137	1.10475
sp|Q9NX58|LYAR_HUMAN	LYAR_HUMAN	LYAR	9.35975	3.05937	1.14	1.1893
sp|P84022|SMAD3_HUMAN;sp|Q15796|SMAD2_HUMAN;sp|O15198|SMAD9_HUMAN	SMAD3_HUMAN	SMAD3	3.61381	1.901	1.13239	1.21487
sp|P22392|NDKB_HUMAN;sp|O60361|NDK8_HUMAN	NDKB_HUMAN	NME2	1.45363	1.20567	1.12555	-2.32218
sp|Q9Y2K1|ZBTB1_HUMAN	ZBTB1_HUMAN	ZBTB1	0	0	1.1133	-1.06823
sp|Q9Y2H2|SAC2_HUMAN	SAC2_HUMAN	INPP5F	2.44708	1.56431	1.08999	1.97992
sp|Q08945|SSRP1_HUMAN	SSRP1_HUMAN	SSRP1	8.61148	2.93453	1.08071	1.42423
sp|P22234|PUR6_HUMAN	PUR6_HUMAN	PAICS	0	0	1.06704	1.22022
sp|Q9Y3L5|RAP2C_HUMAN	RAP2C_HUMAN	RAP2C	0	0	1.05301	1.93243
sp|P18031|PTN1_HUMAN	PTN1_HUMAN	PTPN1	4.74562	2.17844	1.04979	1.01326
sp|Q9UKF6|CPSF3_HUMAN	CPSF3_HUMAN	CPSF3	6.87667	2.62234	1.03514	2.43415
sp|P23588|IF4B_HUMAN	IF4B_HUMAN	EIF4B	3.3904	1.8413	1.03112	2.09499
sp|P35659|DEK_HUMAN	DEK_HUMAN	DEK	4.37658	2.09203	1.02978	1.49421
sp|P61978|HNRPK_HUMAN	HNRPK_HUMAN	HNRNPK	0	0	1.01997	-2.08858
sp|Q8TB36|GDAP1_HUMAN	GDAP1_HUMAN	GDAP1	4.18694	2.0462	1.01286	1.45157
sp|P33981|TTK_HUMAN	TTK_HUMAN	TTK	4.77333	2.1848	1.012	2.48524
sp|Q9Y2X9|ZN281_HUMAN	ZN281_HUMAN	ZNF281	0	0	1.00773	-1.94922
sp|O75410|TACC1_HUMAN	TACC1_HUMAN	TACC1	5.75141	2.39821	1.00731	3.1533
sp|P42224|STAT1_HUMAN	STAT1_HUMAN	STAT1	1.79597	1.34014	1.00707	1.35491
sp|Q70CQ3|UBP30_HUMAN	UBP30_HUMAN	USP30	3.2896	1.81373	1.0038	2.15684
sp|O94813|SLIT2_HUMAN	SLIT2_HUMAN	SLIT2	5.25292	2.29193	1.00301	2.48961
sp|P27824|CALX_HUMAN	CALX_HUMAN	CANX	0.726014	0.852065	1.00133	-2.45295
sp|Q9GZT9|EGLN1_HUMAN	EGLN1_HUMAN	EGLN1	4.71177	2.17066	0.995654	1.36394
sp|Q6P3W7|SCYL2_HUMAN	SCYL2_HUMAN	SCYL2	5.42354	2.32885	0.992231	2.64044
sp|O43175|SERA_HUMAN	SERA_HUMAN	PHGDH	1.22315	1.10596	0.982193	-1.98239
sp|E9PRG8|CK098_HUMAN	CK098_HUMAN	C11orf98	4.51535	2.12494	0.981962	-1.99099
sp|Q9NRA8|4ET_HUMAN	4ET_HUMAN	EIF4ENIF1	5.78218	2.40462	0.975152	2.44674
sp|Q86UE4|LYRIC_HUMAN	LYRIC_HUMAN	MTDH	2.32601	1.52513	0.972222	-2.16847
sp|O14654|IRS4_HUMAN	IRS4_HUMAN	IRS4	4.8326	2.19832	0.967251	-3.23343
sp|P49815|TSC2_HUMAN	TSC2_HUMAN	TSC2	0	0	0.960083	1.38857
sp|P27348|1433T_HUMAN	1433T_HUMAN	YWHAQ	0	0	0.959983	0.997382
sp|Q9HCK8|CHD8_HUMAN	CHD8_HUMAN	CHD8	2.18389	1.4778	0.953447	-3.48658
sp|P16615|AT2A2_HUMAN	AT2A2_HUMAN	ATP2A2	4.29801	2.07316	0.948536	-2.42405
sp|P07737|PROF1_HUMAN	PROF1_HUMAN	PFN1	0	0	0.940407	-2.10236
sp|Q9UHQ9|NB5R1_HUMAN	NB5R1_HUMAN	CYB5R1	3.98053	1.99513	0.940312	2.14918
sp|Q9Y3E5|PTH2_HUMAN	PTH2_HUMAN	PTRH2	0	0	0.929565	1.03065
sp|Q08379|GOGA2_HUMAN	GOGA2_HUMAN	GOLGA2	0.731483	0.855268	0.928257	-2.00932
sp|Q8IYU8|MICU2_HUMAN	MICU2_HUMAN	MICU2	1.85594	1.36233	0.926654	1.63739
sp|P46781|RS9_HUMAN	RS9_HUMAN	RPS9	2.03011	1.42482	0.924226	-2.07154
sp|Q14677|EPN4_HUMAN	EPN4_HUMAN	CLINT1	4.19637	2.04851	0.913952	2.30146
sp|Q9Y2W6|TDRKH_HUMAN	TDRKH_HUMAN	TDRKH	5.65498	2.37802	0.906905	1.01019
sp|Q3YEC7|RABL6_HUMAN	RABL6_HUMAN	RABL6	3.93897	1.98468	0.896587	2.2738
sp|P30876|RPB2_HUMAN	RPB2_HUMAN	POLR2B	0.794561	0.891382	0.896569	-2.39503
sp|O95721|SNP29_HUMAN	SNP29_HUMAN	SNAP29	4.44608	2.10857	0.895045	1.82858
sp|Q9ULE6|PALD_HUMAN	PALD_HUMAN	PALD1	7.18283	2.68008	0.894918	2.37741
sp|P16401|H15_HUMAN	H15_HUMAN	HIST1H1B	31.5305	5.61521	0.891533	1.95072
sp|Q8TEV9|SMCR8_HUMAN	SMCR8_HUMAN	SMCR8	5.38312	2.32016	0.880073	2.75574
sp|Q96RT1|ERBIN_HUMAN	ERBIN_HUMAN	ERBIN	4.28685	2.07047	0.879294	1.06444
sp|Q9NSE4|SYIM_HUMAN	SYIM_HUMAN	IARS2	2.63885	1.62445	0.878022	-2.69363
sp|Q71RC2|LARP4_HUMAN	LARP4_HUMAN	LARP4	6.14315	2.47854	0.873589	1.91832
sp|Q8NG31|KNL1_HUMAN	KNL1_HUMAN	KNL1	0	0	0.872161	-2.72299
sp|P04406|G3P_HUMAN	G3P_HUMAN	GAPDH	1.09543	1.04663	0.861811	-2.07536
sp|Q9HCC0|MCCB_HUMAN	MCCB_HUMAN	MCCC2	27.2488	5.22004	0.854268	1.23992
sp|Q9H4A6|GOLP3_HUMAN	GOLP3_HUMAN	GOLPH3	0	0	0.854018	1.59933
sp|P62917|RL8_HUMAN	RL8_HUMAN	RPL8	1.12937	1.06272	0.851558	-2.06733
sp|Q13442|HAP28_HUMAN	HAP28_HUMAN	PDAP1	4.81633	2.19461	0.850684	1.20897
sp|Q14247|SRC8_HUMAN	SRC8_HUMAN	CTTN	5.70809	2.38916	0.849079	1.76226
sp|Q96A49|SYAP1_HUMAN	SYAP1_HUMAN	SYAP1	4.22891	2.05643	0.846415	1.68429
sp|P35658|NU214_HUMAN	NU214_HUMAN	NUP214	0	0	0.840426	-1.82917
sp|P51570|GALK1_HUMAN	GALK1_HUMAN	GALK1	4.81633	2.19461	0.838079	0.888507
sp|O96011|PX11B_HUMAN	PX11B_HUMAN	PEX11B	3.04547	1.74513	0.837907	1.73413
sp|P05023|AT1A1_HUMAN	AT1A1_HUMAN	ATP1A1	4.36976	2.0904	0.837031	-1.94961
sp|Q9BR76|COR1B_HUMAN	COR1B_HUMAN	CORO1B	4.17654	2.04366	0.834997	1.63889
sp|Q9Y4P8|WIPI2_HUMAN	WIPI2_HUMAN	WIPI2	4.59782	2.14425	0.833813	2.05881
sp|Q14318|FKBP8_HUMAN	FKBP8_HUMAN	FKBP8	4.44362	2.10799	0.802211	1.309
sp|Q8IY17|PLPL6_HUMAN	PLPL6_HUMAN	PNPLA6	1.76503	1.32854	0.800457	-2.42311
sp|P12273|PIP_HUMAN	PIP_HUMAN	PIP	4.5482	2.13265	0.799706	1.72832
sp|Q5T9A4|ATD3B_HUMAN	ATD3B_HUMAN	#N/A	#N/A	#N/A	0.795954	1.1328
sp|P55209|NP1L1_HUMAN	NP1L1_HUMAN	NAP1L1	0	0	0.792383	-1.79139
sp|Q92968|PEX13_HUMAN	PEX13_HUMAN	PEX13	5.0879	2.25564	0.792014	1.32796
sp|Q8N2F6|ARM10_HUMAN	ARM10_HUMAN	ARMC10	3.22656	1.79626	0.791296	1.85181
sp|Q9UH62|ARMX3_HUMAN	ARMX3_HUMAN	ARMCX3	4.73958	2.17706	0.781489	2.33434
sp|Q8TDD1|DDX54_HUMAN	DDX54_HUMAN	DDX54	1.85328	1.36135	0.780954	-2.77197
sp|Q5T8D3|ACBD5_HUMAN	ACBD5_HUMAN	ACBD5	7.20996	2.68514	0.776431	1.87657
sp|Q96AC1|FERM2_HUMAN	FERM2_HUMAN	FERMT2	2.48357	1.57594	0.775222	1.45286
sp|Q9H9A6|LRC40_HUMAN	LRC40_HUMAN	LRRC40	3.65052	1.91063	0.768781	0.884098
sp|Q9H6U6|BCAS3_HUMAN	BCAS3_HUMAN	BCAS3	0	0	0.767841	1.03652
sp|P62263|RS14_HUMAN	RS14_HUMAN	RPS14	1.62601	1.27515	0.764062	-1.57248
sp|Q8ND24|RN214_HUMAN	RN214_HUMAN	RNF214	3.57879	1.89177	0.753814	0.880207
sp|Q8IYB3|SRRM1_HUMAN	SRRM1_HUMAN	SRRM1	2.81478	1.67773	0.750622	-2.17022
sp|Q9Y2Z0|SGT1_HUMAN	SGT1_HUMAN	SUGT1	2.11171	1.45317	0.747244	-1.75805
sp|Q05682|CALD1_HUMAN	CALD1_HUMAN	CALD1	4.99318	2.23454	0.744631	1.90137
sp|Q6PCB5|RSBNL_HUMAN	RSBNL_HUMAN	RSBN1L	0.773648	0.879572	0.74119	-1.69922
sp|P62854|RS26_HUMAN;sp|Q5JNZ5|RS26L_HUMAN	RS26_HUMAN	RPS26	3.42432	1.85049	0.740274	-0.74617
sp|P18206|VINC_HUMAN	VINC_HUMAN	VCL	4.24601	2.06059	0.737868	2.29975
sp|Q96KG9|SCYL1_HUMAN	SCYL1_HUMAN	SCYL1	0	0	0.730336	1.4099
sp|Q13325|IFIT5_HUMAN	IFIT5_HUMAN	IFIT5	4.88622	2.21048	0.730227	1.34316
sp|Q12965|MYO1E_HUMAN	MYO1E_HUMAN	MYO1E	3.47381	1.86382	0.723587	1.11086
sp|O75116|ROCK2_HUMAN	ROCK2_HUMAN	ROCK2	2.89713	1.7021	0.72336	1.55924
sp|Q6FI81|CPIN1_HUMAN	CPIN1_HUMAN	CIAPIN1	5.82148	2.41277	0.722187	1.39736
sp|Q8NDI1|EHBP1_HUMAN	EHBP1_HUMAN	EHBP1	6.40527	2.53086	0.721622	1.3047
sp|Q9HB71|CYBP_HUMAN	CYBP_HUMAN	CACYBP	1.26574	1.12505	0.721008	-1.87894
sp|Q66PJ3|AR6P4_HUMAN	AR6P4_HUMAN	ARL6IP4	1.58664	1.25962	0.714966	1.89036
sp|Q02487|DSC2_HUMAN	DSC2_HUMAN	DSC2	1.7562	1.32522	0.713534	-1.11452
sp|Q8N0V3|RBFA_HUMAN	RBFA_HUMAN	RBFA	0	0	0.712454	1.33904
sp|O00750|P3C2B_HUMAN	P3C2B_HUMAN	PIK3C2B	3.40165	1.84436	0.710467	1.30563
sp|P43307|SSRA_HUMAN	SSRA_HUMAN	SSR1	0	0	0.707584	-2.02923
sp|P62851|RS25_HUMAN	RS25_HUMAN	RPS25	2.36537	1.53798	0.70644	-1.25258
sp|P07814|SYEP_HUMAN	SYEP_HUMAN	EPRS	0.888533	0.942621	0.704693	-1.95297
sp|O14640|DVL1_HUMAN;sp|P54792|DVLP1_HUMAN	DVL1_HUMAN	DVL1	5.40878	2.32568	0.703413	1.50557
sp|B2RTY4|MYO9A_HUMAN	MYO9A_HUMAN	MYO9A	0	0	0.701383	-1.54752
sp|Q92598|HS105_HUMAN	HS105_HUMAN	HSPH1	3.17133	1.78082	0.700599	-2.53319
sp|Q7Z589|EMSY_HUMAN	EMSY_HUMAN	EMSY	0	0	0.700418	-2.02277
sp|O14641|DVL2_HUMAN	DVL2_HUMAN	DVL2	4.34549	2.08458	0.699234	1.41779
sp|Q15431|SYCP1_HUMAN	SYCP1_HUMAN	SYCP1	0	0	0.699151	1.34753
sp|P37802|TAGL2_HUMAN	TAGL2_HUMAN	TAGLN2	4.33667	2.08247	0.696873	1.12836
sp|Q9NPL8|TIDC1_HUMAN	TIDC1_HUMAN	TIMMDC1	0	0	0.69447	1.04211
sp|Q969Z3|MARC2_HUMAN	MARC2_HUMAN	MARC2	3.88011	1.9698	0.692941	1.22925
sp|Q6PKG0|LARP1_HUMAN	LARP1_HUMAN	LARP1	5.04541	2.2462	0.691072	2.31382
sp|Q9H3S7|PTN23_HUMAN	PTN23_HUMAN	PTPN23	2.71146	1.64665	0.690872	1.45497
sp|P53365|ARFP2_HUMAN	ARFP2_HUMAN	ARFIP2	0	0	0.681705	0.968048
sp|Q9UI10|EI2BD_HUMAN	EI2BD_HUMAN	EIF2B4	0	0	0.679385	1.11393
sp|Q8IUD2|RB6I2_HUMAN	RB6I2_HUMAN	ERC1	5.18031	2.27603	0.678011	2.08178
sp|Q9NX40|OCAD1_HUMAN	OCAD1_HUMAN	OCIAD1	4.31826	2.07804	0.674557	1.28148
sp|P46821|MAP1B_HUMAN	MAP1B_HUMAN	MAP1B	2.3747	1.541	0.670734	-2.55268
sp|P50914|RL14_HUMAN	RL14_HUMAN	RPL14	0	0	0.668069	0.746045
sp|O14795|UN13B_HUMAN	UN13B_HUMAN	UNC13B	3.00255	1.73279	0.665526	1.15543
sp|Q01650|LAT1_HUMAN	LAT1_HUMAN	SLC7A5	1.20726	1.09875	0.661944	-1.79812
sp|Q15942|ZYX_HUMAN	ZYX_HUMAN	ZYX	1.88128	1.3716	0.658259	1.23105
sp|O94842|TOX4_HUMAN	TOX4_HUMAN	TOX4	1.00343	1.00171	0.649612	-1.98637
sp|Q96P70|IPO9_HUMAN	IPO9_HUMAN	IPO9	4.67103	2.16126	0.649393	1.11529
sp|Q2TBE0|C19L2_HUMAN	C19L2_HUMAN	CWF19L2	0	0	0.641942	-0.790872
sp|Q9P2D6|F135A_HUMAN	F135A_HUMAN	FAM135A	3.43146	1.85242	0.640323	1.60625
sp|P18124|RL7_HUMAN	RL7_HUMAN	RPL7	3.12414	1.76752	0.639572	1.06069
sp|P49959|MRE11_HUMAN	MRE11_HUMAN	MRE11	5.61463	2.36952	0.639231	1.26684
sp|Q96C19|EFHD2_HUMAN	EFHD2_HUMAN	EFHD2	2.1486	1.46581	0.635799	1.58452
sp|Q9H2H9|S38A1_HUMAN	S38A1_HUMAN	SLC38A1	0.68313	0.826517	0.633494	-2.12421
sp|Q9UGP8|SEC63_HUMAN	SEC63_HUMAN	SEC63	0.748177	0.864972	0.631804	-1.76404
sp|P50416|CPT1A_HUMAN	CPT1A_HUMAN	CPT1A	5.80818	2.41002	0.628694	1.59762
sp|Q7Z6K5|ARPIN_HUMAN	ARPIN_HUMAN	ARPIN	2.89307	1.7009	0.623925	1.79388
sp|P07355|ANXA2_HUMAN;sp|A6NMY6|AXA2L_HUMAN	ANXA2_HUMAN	ANXA2	5.22946	2.2868	0.621788	1.32591
sp|Q92667|AKAP1_HUMAN	AKAP1_HUMAN	AKAP1	12.5547	3.54326	0.617072	0.814393
sp|Q9Y2I1|NISCH_HUMAN	NISCH_HUMAN	NISCH	1.25307	1.11941	0.616634	-1.55323
sp|Q9BU76|MMTA2_HUMAN	MMTA2_HUMAN	MMTAG2	3.54347	1.88241	0.616575	0.671672
sp|Q96N67|DOCK7_HUMAN	DOCK7_HUMAN	DOCK7	1.21438	1.10199	0.616465	-2.75941
sp|Q9Y6B6|SAR1B_HUMAN	SAR1B_HUMAN	SAR1B	1.86984	1.36742	0.615326	1.1409
sp|Q13823|NOG2_HUMAN	NOG2_HUMAN	GNL2	1.20007	1.09548	0.610936	-1.73515
sp|P29597|TYK2_HUMAN	TYK2_HUMAN	TYK2	0.762484	0.873203	0.609556	-1.7782
sp|O43933|PEX1_HUMAN	PEX1_HUMAN	PEX1	4.90832	2.21547	0.609115	1.83489
sp|Q5JTW2|CEP78_HUMAN	CEP78_HUMAN	CEP78	6.22914	2.49582	0.602498	1.78452
sp|O60566|BUB1B_HUMAN	BUB1B_HUMAN	BUB1B	5.49122	2.34333	0.602241	-1.68583
sp|Q9UBC2|EP15R_HUMAN	EP15R_HUMAN	EPS15L1	4.99965	2.23599	0.600799	1.59602
sp|Q8N350|CBARP_HUMAN	CBARP_HUMAN	CBARP	0	0	0.600244	1.49291
sp|O75683|SURF6_HUMAN	SURF6_HUMAN	SURF6	3.33452	1.82607	0.599403	1.94559
sp|P23381|SYWC_HUMAN	SYWC_HUMAN	WARS	3.20775	1.79102	0.598439	1.0329
sp|P13861|KAP2_HUMAN	KAP2_HUMAN	PRKAR2A	4.26224	2.06452	0.59188	1.58265
sp|Q13586|STIM1_HUMAN	STIM1_HUMAN	STIM1	3.29931	1.8164	0.591842	1.81817
sp|Q9UBP9|GULP1_HUMAN	GULP1_HUMAN	GULP1	14.6322	3.82521	0.5917	1.32063
sp|P62304|RUXE_HUMAN	RUXE_HUMAN	SNRPE	0	0	0.589527	-0.931036
sp|Q9Y4W2|LAS1L_HUMAN	LAS1L_HUMAN	LAS1L	1.95336	1.39763	0.589037	1.03249
sp|Q8N0X7|SPG20_HUMAN	SPG20_HUMAN	SPART	4.47197	2.1147	0.588891	1.49138
sp|P36578|RL4_HUMAN	RL4_HUMAN	RPL4	14.2766	3.77844	0.588413	1.31834
sp|Q14137|BOP1_HUMAN	BOP1_HUMAN	BOP1	0.607299	0.779294	0.586231	-1.52249
sp|Q14674|ESPL1_HUMAN	ESPL1_HUMAN	ESPL1	0	0	0.584676	1.21139
sp|P56589|PEX3_HUMAN	PEX3_HUMAN	PEX3	1.65772	1.28753	0.584462	1.33556
sp|Q92522|H1X_HUMAN	H1X_HUMAN	H1FX	4.39174	2.09565	0.583594	1.67898
sp|Q9Y2H6|FND3A_HUMAN	FND3A_HUMAN	FNDC3A	1.11555	1.05619	0.582514	-1.88416
sp|Q8IWE2|NXP20_HUMAN	NXP20_HUMAN	FAM114A1	8.0627	2.83949	0.580022	1.06339
sp|Q8N3C0|ASCC3_HUMAN	ASCC3_HUMAN	ASCC3	0.986091	0.993021	0.579507	-1.63885
sp|Q9NTJ3|SMC4_HUMAN	SMC4_HUMAN	SMC4	1.19106	1.09136	0.579503	-2.14652
sp|Q8TAT6|NPL4_HUMAN	NPL4_HUMAN	NPLOC4	0	0	0.577746	-1.54441
sp|P52789|HXK2_HUMAN	HXK2_HUMAN	HK2	8.34257	2.88835	0.574289	1.95921
sp|P84077|ARF1_HUMAN;sp|P61204|ARF3_HUMAN	ARF1_HUMAN	ARF1	2.84903	1.68791	0.573585	0.839291
sp|Q9UBF8|PI4KB_HUMAN	PI4KB_HUMAN	PI4KB	0	0	0.567271	1.02479
sp|P33176|KINH_HUMAN	KINH_HUMAN	KIF5B	5.46133	2.33695	0.566766	1.51276
sp|Q7L7X3|TAOK1_HUMAN	TAOK1_HUMAN	TAOK1	0	0	0.560149	0.800454
sp|P11717|MPRI_HUMAN	MPRI_HUMAN	IGF2R	3.7535	1.93739	0.555558	-1.72022
sp|P62826|RAN_HUMAN	RAN_HUMAN	RAN	1.20232	1.0965	0.554893	-1.27661
sp|Q9HAD4|WDR41_HUMAN	WDR41_HUMAN	WDR41	10.7207	3.27425	0.551909	1.63536
sp|P38646|GRP75_HUMAN	GRP75_HUMAN	HSPA9	3.22022	1.7945	0.551842	-1.73026
sp|Q92540|SMG7_HUMAN	SMG7_HUMAN	SMG7	1.48823	1.21993	0.551373	1.33504
sp|Q9Y6M7|S4A7_HUMAN	S4A7_HUMAN	SLC4A7	2.28045	1.51012	0.549904	-1.76059
sp|Q5HYI7|MTX3_HUMAN	MTX3_HUMAN	MTX3	3.66957	1.91561	0.545375	1.36072
sp|Q9P258|RCC2_HUMAN	RCC2_HUMAN	RCC2	0	0	0.543866	0.979906
sp|Q96GQ7|DDX27_HUMAN	DDX27_HUMAN	DDX27	6.11012	2.47187	0.54352	1.70178
sp|Q9H019|MFR1L_HUMAN	MFR1L_HUMAN	MTFR1L	2.78396	1.66852	0.542913	0.888203
sp|Q8TER5|ARH40_HUMAN	ARH40_HUMAN	ARHGEF40	0	0	0.538494	-0.899512
sp|Q8NEN9|PDZD8_HUMAN	PDZD8_HUMAN	PDZD8	0.808249	0.899027	0.537243	-1.73433
sp|Q9H089|LSG1_HUMAN	LSG1_HUMAN	LSG1	1.17272	1.08292	0.535361	0.905967
sp|Q6ZSR9|YJ005_HUMAN	YJ005_HUMAN	FLJ45252	1.28302	1.1327	0.534919	-0.868287
sp|P18564|ITB6_HUMAN	ITB6_HUMAN	ITGB6	0	0	0.533903	1.42732
sp|Q9UJV9|DDX41_HUMAN	DDX41_HUMAN	DDX41	0	0	0.533171	-1.14076
sp|Q96H55|MYO19_HUMAN	MYO19_HUMAN	MYO19	0	0	0.533086	0.7083
sp|O75663|TIPRL_HUMAN	TIPRL_HUMAN	TIPRL	3.10558	1.76226	0.531104	1.33213
sp|Q15390|MTFR1_HUMAN	MTFR1_HUMAN	MTFR1	4.40008	2.09764	0.529283	1.33053
sp|Q96QD8|S38A2_HUMAN	S38A2_HUMAN	SLC38A2	0	0	0.527976	-1.6425
sp|O00213|APBB1_HUMAN	APBB1_HUMAN	APBB1	3.77237	1.94226	0.526123	1.43615
sp|Q5C9Z4|NOM1_HUMAN	NOM1_HUMAN	NOM1	3.4722	1.86338	0.524959	-1.13587
sp|Q9C0D5|TANC1_HUMAN	TANC1_HUMAN	TANC1	4.16739	2.04142	0.523965	1.26976
sp|Q8IVF7|FMNL3_HUMAN	FMNL3_HUMAN	FMNL3	4.18314	2.04527	0.523868	1.68534
sp|Q99551|MTEF1_HUMAN	MTEF1_HUMAN	MTERF1	4.98019	2.23163	0.522942	0.793859
sp|Q5UIP0|RIF1_HUMAN	RIF1_HUMAN	RIF1	2.17086	1.47339	0.522854	0.929867
sp|Q9BZE4|NOG1_HUMAN	NOG1_HUMAN	GTPBP4	5.38926	2.32148	0.522378	1.6844
sp|Q9P2E9|RRBP1_HUMAN	RRBP1_HUMAN	RRBP1	1.56986	1.25294	0.52235	-2.24143
sp|P51610|HCFC1_HUMAN	HCFC1_HUMAN	HCFC1	3.1317	1.76966	0.520351	-1.82606
sp|Q8WU79|SMAP2_HUMAN	SMAP2_HUMAN	SMAP2	36.7807	6.06471	0.518576	0.755294
sp|Q02878|RL6_HUMAN	RL6_HUMAN	RPL6	7.45546	2.73047	0.518024	1.49035
sp|O60664|PLIN3_HUMAN	PLIN3_HUMAN	PLIN3	4.93037	2.22044	0.516895	0.666587
sp|Q70E73|RAPH1_HUMAN	RAPH1_HUMAN	RAPH1	2.21497	1.48828	0.516438	1.30754
sp|Q9H6Z4|RANB3_HUMAN	RANB3_HUMAN	RANBP3	0.920123	0.959231	0.515191	-1.19337
sp|O14981|BTAF1_HUMAN	BTAF1_HUMAN	BTAF1	4.45808	2.11142	0.514955	0.865432
sp|Q6P2H3|CEP85_HUMAN	CEP85_HUMAN	CEP85	0	0	0.514487	-0.742216
sp|Q9UPS8|ANR26_HUMAN	ANR26_HUMAN	ANKRD26	2.19861	1.48277	0.510815	1.51849
sp|P13797|PLST_HUMAN	PLST_HUMAN	PLS3	1.12811	1.06213	0.510483	-1.11906
sp|Q14596|NBR1_HUMAN	NBR1_HUMAN	NBR1	3.7053	1.92492	0.508081	0.882016
sp|Q7Z2W4|ZCCHV_HUMAN	ZCCHV_HUMAN	ZC3HAV1	8.8601	2.97659	0.506449	1.27376
sp|Q6WKZ4|RFIP1_HUMAN	RFIP1_HUMAN	RAB11FIP1	3.26716	1.80753	0.504015	-1.41937
sp|Q8N5F7|NKAP_HUMAN	NKAP_HUMAN	NKAP	12.9551	3.59932	0.501268	1.22204
sp|Q9H2G2|SLK_HUMAN	SLK_HUMAN	SLK	5.71423	2.39045	0.498101	1.72127
sp|Q5VTE0|EF1A3_HUMAN;sp|P68104|EF1A1_HUMAN	EF1A3_HUMAN	EEF1A1P5	0	0	0.497119	-0.485583
sp|O75113|N4BP1_HUMAN	N4BP1_HUMAN	N4BP1	0.913419	0.95573	0.494787	-1.66146
sp|O15027|SC16A_HUMAN	SC16A_HUMAN	SEC16A	3.66123	1.91343	0.488927	-1.30133
sp|P27708|PYR1_HUMAN	PYR1_HUMAN	CAD	0.720766	0.848979	0.488655	-1.32649
sp|Q6UB35|C1TM_HUMAN	C1TM_HUMAN	MTHFD1L	0	0	0.488483	-1.11403
sp|Q15637|SF01_HUMAN	SF01_HUMAN	SF1	0	0	0.487378	-0.816047
sp|Q9BXK5|B2L13_HUMAN	B2L13_HUMAN	BCL2L13	5.47485	2.33984	0.486859	0.891944
sp|Q99707|METH_HUMAN	METH_HUMAN	MTR	6.0326	2.45614	0.486492	-1.91301
sp|P39019|RS19_HUMAN	RS19_HUMAN	RPS19	2.0355	1.42671	0.485726	0.93955
sp|P06733|ENOA_HUMAN	ENOA_HUMAN	ENO1	3.40463	1.84516	0.483449	1.26095
sp|P11387|TOP1_HUMAN	TOP1_HUMAN	TOP1	4.06507	2.0162	0.48165	1.36379
sp|O00400|ACATN_HUMAN	ACATN_HUMAN	SLC33A1	0	0	0.481158	-1.21275
sp|P25685|DNJB1_HUMAN	DNJB1_HUMAN	DNAJB1	0	0	0.480958	-1.26254
sp|P35241|RADI_HUMAN	RADI_HUMAN	RDX	7.20929	2.68501	0.480541	0.639847
sp|Q15758|AAAT_HUMAN	AAAT_HUMAN	SLC1A5	3.36412	1.83415	0.48019	-0.937476
sp|P60842|IF4A1_HUMAN	IF4A1_HUMAN	EIF4A1	1.30769	1.14354	0.479561	-1.29763
sp|P00387|NB5R3_HUMAN	NB5R3_HUMAN	CYB5R3	3.22605	1.79612	0.477209	0.750146
sp|Q99700|ATX2_HUMAN	ATX2_HUMAN	ATXN2	0	0	0.472133	0.91669
sp|Q86UB9|TM135_HUMAN	TM135_HUMAN	TMEM135	2.19499	1.48155	0.470832	1.09781
sp|O00571|DDX3X_HUMAN;sp|O15523|DDX3Y_HUMAN	DDX3X_HUMAN	DDX3X	3.74559	1.93535	0.470769	1.44351
sp|P53804|TTC3_HUMAN	TTC3_HUMAN	TTC3	0.978792	0.989339	0.468722	-1.39428
sp|O95478|NSA2_HUMAN	NSA2_HUMAN	NSA2	3.48127	1.86581	0.466348	0.914393
sp|Q96A33|CCD47_HUMAN	CCD47_HUMAN	CCDC47	2.58085	1.6065	0.464409	-1.36092
sp|Q9UKA2|FBXL4_HUMAN	FBXL4_HUMAN	FBXL4	0	0	0.464299	0.888366
sp|Q15084|PDIA6_HUMAN	PDIA6_HUMAN	PDIA6	0	0	0.463157	0.600581
sp|Q9UJU6|DBNL_HUMAN	DBNL_HUMAN	DBNL	7.11571	2.66753	0.462531	0.637978
sp|Q5THJ4|VP13D_HUMAN	VP13D_HUMAN	VPS13D	11.3794	3.37334	0.461408	2.0018
sp|P55011|S12A2_HUMAN	S12A2_HUMAN	SLC12A2	3.80528	1.95071	0.46039	-0.723679
sp|P11498|PYC_HUMAN	PYC_HUMAN	PC	19.8152	4.45142	0.458765	0.747156
sp|P25705|ATPA_HUMAN	ATPA_HUMAN	ATP5F1A	0.883819	0.940116	0.455226	-1.25592
sp|P41440|S19A1_HUMAN	S19A1_HUMAN	SLC19A1	1.00212	1.00106	0.45443	-1.32947
sp|Q86XI2|CNDG2_HUMAN	CNDG2_HUMAN	NCAPG2	0	0	0.453437	0.720807
sp|P00533|EGFR_HUMAN	EGFR_HUMAN	EGFR	4.36749	2.08985	0.452806	0.70055
sp|Q9UHR5|S30BP_HUMAN	S30BP_HUMAN	SAP30BP	6.70981	2.59033	0.452492	-0.822284
sp|Q9UL25|RAB21_HUMAN	RAB21_HUMAN	RAB21	3.1945	1.78732	0.452361	0.846604
sp|Q8IZH2|XRN1_HUMAN	XRN1_HUMAN	XRN1	6.39113	2.52807	0.452302	1.80008
sp|P83881|RL36A_HUMAN	RL36A_HUMAN	RPL36A	10.3555	3.21799	0.452291	-0.51107
sp|Q7Z434|MAVS_HUMAN	MAVS_HUMAN	MAVS	7.37988	2.71659	0.451659	0.627875
sp|O94906|PRP6_HUMAN	PRP6_HUMAN	PRPF6	1.3804	1.1749	0.451166	-1.54764
sp|Q6XZF7|DNMBP_HUMAN	DNMBP_HUMAN	DNMBP	1.94219	1.39362	0.450986	0.571514
sp|O60716|CTND1_HUMAN	CTND1_HUMAN	CTNND1	4.14582	2.03613	0.450747	1.37126
sp|Q03001|DYST_HUMAN	DYST_HUMAN	DST	11.6818	3.41787	0.450475	1.87729
sp|Q9NP61|ARFG3_HUMAN	ARFG3_HUMAN	ARFGAP3	9.56392	3.09256	0.44644	0.95065
sp|Q9H7C9|AAMDC_HUMAN	AAMDC_HUMAN	AAMDC	0	0	0.445988	1.01959
sp|Q5SY16|NOL9_HUMAN	NOL9_HUMAN	NOL9	0	0	0.444779	0.681369
sp|O75976|CBPD_HUMAN	CBPD_HUMAN	CPD	3.28266	1.81181	0.442931	-1.475
sp|Q8IVF2|AHNK2_HUMAN	AHNK2_HUMAN	AHNAK2	0.853627	0.92392	0.442902	-1.83545
sp|Q9Y679|AUP1_HUMAN	AUP1_HUMAN	AUP1	4.66701	2.16033	0.441731	-1.12627
sp|O43169|CYB5B_HUMAN	CYB5B_HUMAN	CYB5B	1.00341	1.00171	0.437294	-1.3429
sp|Q9UPU7|TBD2B_HUMAN	TBD2B_HUMAN	TBC1D2B	0	0	0.434406	-0.873169
sp|Q15417|CNN3_HUMAN	CNN3_HUMAN	CNN3	2.84196	1.68581	0.434281	1.30875
sp|Q92616|GCN1_HUMAN	GCN1_HUMAN	GCN1	4.66333	2.15947	0.433852	1.3543
sp|Q08AD1|CAMP2_HUMAN	CAMP2_HUMAN	CAMSAP2	0	0	0.433308	0.602131
sp|Q14839|CHD4_HUMAN	CHD4_HUMAN	CHD4	2.89304	1.70089	0.432247	-1.50641
sp|Q8TCG1|CIP2A_HUMAN	CIP2A_HUMAN	CIP2A	5.34089	2.31104	0.430818	1.29276
sp|Q96HC4|PDLI5_HUMAN	PDLI5_HUMAN	PDLIM5	3.84533	1.96095	0.430158	1.22464
sp|Q5DJT8|CT452_HUMAN;sp|P0DMV2|CT459_HUMAN;sp|P0DMV1|CT458_HUMAN;sp|P0DMU9|CT45A_HUMAN;sp|Q8NHU0|CT453_HUMAN;sp|Q5HYN5|CT451_HUMAN;sp|P0DMV0|CT457_HUMAN;sp|P0DMU8|CT455_HUMAN;sp|P0DMU7|CT456_HUMAN	CT452_HUMAN	CT45A2	2.56726	1.60227	0.425905	1.02781
sp|Q9Y490|TLN1_HUMAN	TLN1_HUMAN	TLN1	7.66979	2.76944	0.425074	1.42119
sp|P61927|RL37_HUMAN	RL37_HUMAN	RPL37	7.77422	2.78823	0.42305	1.0761
sp|Q9NP64|NO40_HUMAN	NO40_HUMAN	ZCCHC17	1.99494	1.41242	0.422977	1.09043
sp|Q9GZY8|MFF_HUMAN	MFF_HUMAN	MFF	3.50851	1.8731	0.421249	1.26389
sp|Q4VCS5|AMOT_HUMAN	AMOT_HUMAN	AMOT	3.40434	1.84508	0.420309	-1.96843
sp|Q8TEU7|RPGF6_HUMAN	RPGF6_HUMAN	RAPGEF6	2.46198	1.56907	0.420098	-1.39602
sp|Q7Z7L1|SLN11_HUMAN	SLN11_HUMAN	SLFN11	4.93764	2.22208	0.419977	0.787738
sp|P61247|RS3A_HUMAN	RS3A_HUMAN	RPS3A	2.20783	1.48588	0.415871	-1.38601
sp|O00151|PDLI1_HUMAN	PDLI1_HUMAN	PDLIM1	2.47629	1.57362	0.413905	1.08207
sp|O95372|LYPA2_HUMAN	LYPA2_HUMAN	LYPLA2	3.27893	1.81078	0.412443	1.21206
sp|Q71U36|TBA1A_HUMAN	TBA1A_HUMAN	TUBA1A	0	0	0.411987	-0.880102
sp|P62241|RS8_HUMAN	RS8_HUMAN	RPS8	3.89036	1.9724	0.410734	-0.43749
sp|P62913|RL11_HUMAN	RL11_HUMAN	RPL11	2.40716	1.5515	0.410029	-0.756867
sp|P62273|RS29_HUMAN	RS29_HUMAN	RPS29	4.33811	2.08281	0.409178	1.58229
sp|P51572|BAP31_HUMAN	BAP31_HUMAN	BCAP31	0	0	0.409123	1.01236
sp|P17812|PYRG1_HUMAN	PYRG1_HUMAN	CTPS1	3.90057	1.97499	0.409052	1.3302
sp|Q15208|STK38_HUMAN	STK38_HUMAN	STK38	13.2072	3.63417	0.407454	1.04948
sp|Q969Q0|RL36L_HUMAN	RL36L_HUMAN	RPL36AL	7.02211	2.64993	0.40698	1.30357
sp|O15056|SYNJ2_HUMAN	SYNJ2_HUMAN	SYNJ2	3.11143	1.76393	0.406932	0.809117
sp|Q9Y4H2|IRS2_HUMAN	IRS2_HUMAN	IRS2	6.67384	2.58338	0.405267	1.38307
sp|Q8WVS4|WDR60_HUMAN	WDR60_HUMAN	WDR60	1.97118	1.40399	0.40228	-1.28778
sp|Q92575|UBXN4_HUMAN	UBXN4_HUMAN	UBXN4	4.43346	2.10558	0.401784	0.833211
sp|Q9UQ35|SRRM2_HUMAN	SRRM2_HUMAN	SRRM2	2.06854	1.43824	0.400868	-1.67807
sp|P20020|AT2B1_HUMAN	AT2B1_HUMAN	ATP2B1	1.28736	1.13462	0.400416	-1.32906
sp|Q96CS3|FAF2_HUMAN	FAF2_HUMAN	FAF2	3.32388	1.82315	0.400244	0.996896
sp|P15531|NDKA_HUMAN	NDKA_HUMAN	NME1	1.5147	1.23073	0.398801	0.820348
sp|O60749|SNX2_HUMAN	SNX2_HUMAN	SNX2	2.56079	1.60025	0.397881	0.871651
sp|Q99879|H2B1M_HUMAN;sp|Q99880|H2B1L_HUMAN;sp|Q99877|H2B1N_HUMAN;sp|Q93079|H2B1H_HUMAN;sp|Q5QNW6|H2B2F_HUMAN;sp|P62807|H2B1C_HUMAN;sp|P58876|H2B1D_HUMAN;sp|P57053|H2BFS_HUMAN;sp|O60814|H2B1K_HUMAN	H2B1M_HUMAN	#N/A	#N/A	#N/A	0.397018	1.11502
sp|Q9C0C9|UBE2O_HUMAN	UBE2O_HUMAN	UBE2O	0	0	0.396183	-0.943147
sp|P47914|RL29_HUMAN	RL29_HUMAN	RPL29	2.95617	1.71935	0.395918	-0.598922
sp|Q15056|IF4H_HUMAN	IF4H_HUMAN	EIF4H	1.84767	1.35929	0.393717	1.10678
sp|Q8NBU5|ATAD1_HUMAN	ATAD1_HUMAN	ATAD1	4.01492	2.00373	0.392796	0.529817
sp|Q9BVV6|TALD3_HUMAN	TALD3_HUMAN	#N/A	#N/A	#N/A	0.392789	-0.529863
sp|P21397|AOFA_HUMAN	AOFA_HUMAN	MAOA	5.95232	2.43974	0.391187	2.01218
sp|O95470|SGPL1_HUMAN	SGPL1_HUMAN	SGPL1	2.7315	1.65272	0.390743	-1.39766
sp|Q8IXI2|MIRO1_HUMAN	MIRO1_HUMAN	RHOT1	0	0	0.387881	-0.667991
sp|P35579|MYH9_HUMAN	MYH9_HUMAN	MYH9	7.03692	2.65272	0.387551	1.29088
sp|P24752|THIL_HUMAN	THIL_HUMAN	ACAT1	1.32368	1.15051	0.386696	-1.10373
sp|Q9UJF2|NGAP_HUMAN	NGAP_HUMAN	RASAL2	2.51549	1.58603	0.384031	-1.32289
sp|P30519|HMOX2_HUMAN	HMOX2_HUMAN	HMOX2	0	0	0.383169	-1.05745
sp|Q92841|DDX17_HUMAN	DDX17_HUMAN	DDX17	0	0	0.380355	-0.986644
sp|Q14331|FRG1_HUMAN	FRG1_HUMAN	FRG1	1.03158	1.01567	0.378369	1.04735
sp|P49756|RBM25_HUMAN	RBM25_HUMAN	RBM25	0	0	0.377347	-1.15633
sp|P27635|RL10_HUMAN	RL10_HUMAN	RPL10	5.8597	2.42068	0.376538	-0.382649
sp|Q9UEY8|ADDG_HUMAN	ADDG_HUMAN	ADD3	2.54633	1.59572	0.376285	0.993034
sp|Q8TD26|CHD6_HUMAN	CHD6_HUMAN	CHD6	3.59631	1.89639	0.373779	0.57959
sp|Q5HYI8|RABL3_HUMAN	RABL3_HUMAN	RABL3	1.55098	1.24538	0.37367	1.18601
sp|O43491|E41L2_HUMAN	E41L2_HUMAN	EPB41L2	5.38735	2.32107	0.373592	-1.06124
sp|O95831|AIFM1_HUMAN	AIFM1_HUMAN	AIFM1	3.96475	1.99117	0.373533	-0.825733
sp|O95210|STBD1_HUMAN	STBD1_HUMAN	STBD1	12.5018	3.53579	0.372678	0.823784
sp|Q13642|FHL1_HUMAN	FHL1_HUMAN	FHL1	1.44034	1.20014	0.36904	0.941591
sp|O00567|NOP56_HUMAN	NOP56_HUMAN	NOP56	2.58181	1.6068	0.368245	-1.34964
sp|Q9NZ52|GGA3_HUMAN	GGA3_HUMAN	GGA3	1.21064	1.10029	0.365933	-0.833673
sp|Q9NZZ3|CHMP5_HUMAN	CHMP5_HUMAN	CHMP5	1.8119	1.34607	0.36568	0.845462
sp|P51617|IRAK1_HUMAN	IRAK1_HUMAN	IRAK1	4.91214	2.21634	0.365208	0.996508
sp|P62277|RS13_HUMAN	RS13_HUMAN	RPS13	2.67829	1.63655	0.363685	1.09614
sp|Q14008|CKAP5_HUMAN	CKAP5_HUMAN	CKAP5	6.20565	2.49111	0.362877	1.56696
sp|Q92878|RAD50_HUMAN	RAD50_HUMAN	RAD50	1.78154	1.33474	0.362325	-1.23628
sp|Q92615|LAR4B_HUMAN	LAR4B_HUMAN	LARP4B	3.17128	1.78081	0.360294	0.459048
sp|Q8IZ21|PHAR4_HUMAN	PHAR4_HUMAN	PHACTR4	6.73524	2.59523	0.358485	0.804037
sp|Q562F6|SGO2_HUMAN	SGO2_HUMAN	SGO2	7.12995	2.6702	0.357704	1.36319
sp|P25054|APC_HUMAN	APC_HUMAN	APC	0	0	0.357515	0.515018
sp|Q9ULH7|MKL2_HUMAN	MKL2_HUMAN	MRTFB	4.94061	2.22275	0.355702	1.19709
sp|Q9C026|TRIM9_HUMAN	TRIM9_HUMAN	TRIM9	2.80081	1.67356	0.355364	0.49465
sp|Q02040|AK17A_HUMAN	AK17A_HUMAN	AKAP17A	2.79206	1.67095	0.354281	-1.25291
sp|Q9ULM3|YETS2_HUMAN	YETS2_HUMAN	YEATS2	1.12067	1.05862	0.352217	-1.19619
sp|Q9H5V9|CX056_HUMAN	CX056_HUMAN	CXorf56	0.762456	0.873187	0.351838	-1.14441
sp|P63010|AP2B1_HUMAN	AP2B1_HUMAN	AP2B1	0	0	0.350983	-0.649345
sp|Q9Y5K6|CD2AP_HUMAN	CD2AP_HUMAN	CD2AP	3.1446	1.7733	0.350459	1.17381
sp|Q9UHB9|SRP68_HUMAN	SRP68_HUMAN	SRP68	3.68211	1.91888	0.348632	-1.17961
sp|O75717|WDHD1_HUMAN	WDHD1_HUMAN	#N/A	#N/A	#N/A	0.348448	0.678784
sp|Q9UM54|MYO6_HUMAN	MYO6_HUMAN	MYO6	1.37769	1.17375	0.346787	-0.949423
sp|Q15398|DLGP5_HUMAN	DLGP5_HUMAN	DLGAP5	1.20846	1.0993	0.346563	-0.74291
sp|P17480|UBF1_HUMAN	UBF1_HUMAN	UBTF	2.47065	1.57183	0.345858	0.819593
sp|Q13480|GAB1_HUMAN	GAB1_HUMAN	GAB1	0	0	0.344491	-0.47547
sp|O95391|SLU7_HUMAN	SLU7_HUMAN	SLU7	0	0	0.344012	0.599391
sp|O60231|DHX16_HUMAN	DHX16_HUMAN	DHX16	0	0	0.341636	0.626075
sp|P35613|BASI_HUMAN	BASI_HUMAN	BSG	1.12201	1.05925	0.339766	1.05132
sp|Q8TC07|TBC15_HUMAN	TBC15_HUMAN	TBC1D15	6.00521	2.45055	0.336196	1.15216
sp|Q5T6F2|UBAP2_HUMAN	UBAP2_HUMAN	UBAP2	1.09557	1.04669	0.335307	0.965644
sp|Q9H6T3|RPAP3_HUMAN	RPAP3_HUMAN	RPAP3	1.81974	1.34898	0.334528	-1.08023
sp|P62979|RS27A_HUMAN;sp|P0CG47|UBB_HUMAN;sp|P0CG48|UBC_HUMAN	RS27A_HUMAN	RPS27A	4.09325	2.02318	0.332267	-0.288041
sp|Q6ZUT1|CK057_HUMAN	CK057_HUMAN	NKAPD1	3.35001	1.8303	0.332226	0.670513
sp|P78344|IF4G2_HUMAN	IF4G2_HUMAN	EIF4G2	4.13258	2.03288	0.331091	1.15823
sp|P46060|RAGP1_HUMAN	RAGP1_HUMAN	RANGAP1	1.26467	1.12458	0.330285	-1.42266
sp|P08195|4F2_HUMAN	4F2_HUMAN	SLC3A2	5.69425	2.38626	0.329706	-0.522287
sp|Q8IY81|SPB1_HUMAN	SPB1_HUMAN	FTSJ3	5.31488	2.3054	0.326906	0.728619
sp|Q15334|L2GL1_HUMAN	L2GL1_HUMAN	LLGL1	0	0	0.326122	0.542162
sp|P81605|DCD_HUMAN	DCD_HUMAN	DCD	3.66575	1.91462	0.325864	0.944612
sp|Q9H3P7|GCP60_HUMAN	GCP60_HUMAN	ACBD3	3.60794	1.89946	0.324283	1.11077
sp|O14976|GAK_HUMAN	GAK_HUMAN	GAK	3.6706	1.91588	0.322759	0.951168
sp|Q9UNX3|RL26L_HUMAN	RL26L_HUMAN	RPL26L1	4.35348	2.0865	0.320998	-1.09331
sp|Q8NI27|THOC2_HUMAN	THOC2_HUMAN	THOC2	2.47405	1.57291	0.320421	-1.00309
sp|Q8WXH0|SYNE2_HUMAN	SYNE2_HUMAN	SYNE2	5.74431	2.39673	0.320092	-1.61469
sp|Q71UM5|RS27L_HUMAN	RS27L_HUMAN	RPS27L	0	0	0.318604	1.31867
sp|Q8IYB5|SMAP1_HUMAN	SMAP1_HUMAN	SMAP1	45.8652	6.77239	0.317967	0.753126
sp|Q86UK7|ZN598_HUMAN	ZN598_HUMAN	ZNF598	2.28914	1.51299	0.317089	-0.866266
sp|P61254|RL26_HUMAN	RL26_HUMAN	RPL26	6.81916	2.61135	0.313213	-0.428489
sp|P62280|RS11_HUMAN	RS11_HUMAN	RPS11	2.67885	1.63672	0.3123	-0.971619
sp|O15294|OGT1_HUMAN	OGT1_HUMAN	OGT	8.86787	2.9779	0.311281	0.802757
sp|Q15361|TTF1_HUMAN	TTF1_HUMAN	TTF1	4.25428	2.06259	0.307163	1.19298
sp|Q641Q2|WAC2A_HUMAN;sp|Q9Y4E1|WAC2C_HUMAN	WAC2A_HUMAN	WASHC2A	0	0	0.305844	-0.686936
sp|P10412|H14_HUMAN	H14_HUMAN	HIST1H1E	11.6461	3.41263	0.304225	0.585499
sp|P14618|KPYM_HUMAN	KPYM_HUMAN	PKM	1.39278	1.18016	0.303317	-0.77685
sp|O15042|SR140_HUMAN	SR140_HUMAN	U2SURP	0	0	0.302068	0.872722
sp|P53367|ARFP1_HUMAN	ARFP1_HUMAN	ARFIP1	2.21723	1.48904	0.30192	0.639561
sp|Q9Y5X1|SNX9_HUMAN	SNX9_HUMAN	SNX9	2.18135	1.47694	0.301628	0.944903
sp|P19367|HXK1_HUMAN	HXK1_HUMAN	HK1	10.9865	3.31458	0.301147	0.895191
sp|Q3V6T2|GRDN_HUMAN	GRDN_HUMAN	CCDC88A	2.71641	1.64815	0.300017	0.984376
sp|Q05823|RN5A_HUMAN	RN5A_HUMAN	RNASEL	3.94302	1.9857	0.297571	0.604731
sp|Q9Y666|S12A7_HUMAN	S12A7_HUMAN	SLC12A7	0	0	0.297214	-0.871853
sp|Q14683|SMC1A_HUMAN	SMC1A_HUMAN	SMC1A	1.14653	1.07076	0.296979	-1.08649
sp|P21796|VDAC1_HUMAN	VDAC1_HUMAN	VDAC1	0	0	0.295807	0.692553
sp|P32121|ARRB2_HUMAN	ARRB2_HUMAN	ARRB2	0	0	0.290036	-0.844541
sp|P62701|RS4X_HUMAN	RS4X_HUMAN	RPS4X	3.03065	1.74088	0.289804	-0.47679
sp|Q5SVZ6|ZMYM1_HUMAN	ZMYM1_HUMAN	ZMYM1	5.04358	2.24579	0.286026	1.03147
sp|P15311|EZRI_HUMAN	EZRI_HUMAN	EZR	5.5062	2.34653	0.285877	0.757321
sp|Q7Z2K8|GRIN1_HUMAN	GRIN1_HUMAN	GPRIN1	0	0	0.28558	-0.683959
sp|Q9H0A0|NAT10_HUMAN	NAT10_HUMAN	NAT10	3.51088	1.87374	0.284348	-1.01821
sp|Q7Z7G8|VP13B_HUMAN	VP13B_HUMAN	VPS13B	1.47929	1.21626	0.283995	-0.823934
sp|Q9UHD8|SEPT9_HUMAN	SEPT9_HUMAN	SEPTIN9	2.44681	1.56423	0.282294	0.523152
sp|Q86UP2|KTN1_HUMAN	KTN1_HUMAN	KTN1	5.91217	2.4315	0.28127	-0.569869
sp|Q9Y2U8|MAN1_HUMAN	MAN1_HUMAN	LEMD3	2.23117	1.49371	0.279795	0.903454
sp|Q9BZH6|WDR11_HUMAN	WDR11_HUMAN	WDR11	0	0	0.279522	0.390288
sp|Q13190|STX5_HUMAN	STX5_HUMAN	STX5	3.41714	1.84855	0.278858	-1.04677
sp|Q9NZJ7|MTCH1_HUMAN	MTCH1_HUMAN	MTCH1	0	0	0.278783	0.34681
sp|O75643|U520_HUMAN	U520_HUMAN	SNRNP200	1.58341	1.25834	0.278406	-0.789532
sp|Q4KMP7|TB10B_HUMAN	TB10B_HUMAN	TBC1D10B	3.50958	1.87339	0.276466	0.796578
sp|O75821|EIF3G_HUMAN	EIF3G_HUMAN	EIF3G	5.42704	2.3296	0.275624	0.489223
sp|Q7LBC6|KDM3B_HUMAN	KDM3B_HUMAN	KDM3B	3.6133	1.90087	0.274868	0.535659
sp|O95433|AHSA1_HUMAN	AHSA1_HUMAN	AHSA1	8.1285	2.85105	0.274652	-0.654742
sp|Q9Y6A5|TACC3_HUMAN	TACC3_HUMAN	TACC3	0	0	0.274344	0.283974
sp|P61353|RL27_HUMAN	RL27_HUMAN	RPL27	2.0729	1.43976	0.274082	-0.767846
sp|P21333|FLNA_HUMAN	FLNA_HUMAN	FLNA	16.7001	4.08658	0.273985	0.750237
sp|Q8IWC1|MA7D3_HUMAN	MA7D3_HUMAN	MAP7D3	0.907419	0.952585	0.273932	-0.90452
sp|P15924|DESP_HUMAN	DESP_HUMAN	DSP	7.93743	2.81734	0.272474	-1.07638
sp|Q9BXW9|FACD2_HUMAN	FACD2_HUMAN	FANCD2	1.04211	1.02084	0.272283	-0.662976
sp|P60468|SC61B_HUMAN	SC61B_HUMAN	SEC61B	0	0	0.271978	0.855259
sp|P11021|GRP78_HUMAN	GRP78_HUMAN	HSPA5	4.45238	2.11007	0.271253	-0.911859
sp|P55196|AFAD_HUMAN	AFAD_HUMAN	AFDN	12.9448	3.59789	0.271191	1.04618
sp|Q02224|CENPE_HUMAN	CENPE_HUMAN	CENPE	0	0	0.269807	0.593011
sp|Q2NKX8|ERC6L_HUMAN	ERC6L_HUMAN	ERCC6L	2.10294	1.45015	0.269756	-0.981954
sp|Q9Y3U8|RL36_HUMAN	RL36_HUMAN	RPL36	2.09917	1.44885	0.26809	0.660671
sp|Q14684|RRP1B_HUMAN	RRP1B_HUMAN	RRP1B	6.69831	2.58811	0.268033	0.444215
sp|Q9H6J7|CK049_HUMAN	CK049_HUMAN	C11orf49	2.99856	1.73164	0.267606	0.599189
sp|O95232|LC7L3_HUMAN	LC7L3_HUMAN	LUC7L3	2.02107	1.42164	0.266516	0.658787
sp|Q96KP1|EXOC2_HUMAN	EXOC2_HUMAN	EXOC2	6.76007	2.60001	0.265543	0.690169
sp|P13804|ETFA_HUMAN	ETFA_HUMAN	ETFA	0	0	0.260329	-0.926886
sp|Q5JSH3|WDR44_HUMAN	WDR44_HUMAN	WDR44	1.40057	1.18346	0.257677	-0.920111
sp|Q9Y3C1|NOP16_HUMAN	NOP16_HUMAN	NOP16	1.04417	1.02185	0.256164	-0.733478
sp|P42167|LAP2B_HUMAN	LAP2B_HUMAN	TMPO	3.74084	1.93413	0.252676	-0.458582
sp|P41250|GARS_HUMAN	GARS_HUMAN	GARS	0	0	0.252606	-0.367687
sp|Q9Y2X3|NOP58_HUMAN	NOP58_HUMAN	NOP58	2.74391	1.65648	0.252305	0.671168
sp|Q96R06|SPAG5_HUMAN	SPAG5_HUMAN	SPAG5	0	0	0.252047	-0.764689
sp|P83731|RL24_HUMAN	RL24_HUMAN	RPL24	6.50591	2.55067	0.251999	0.314582
sp|Q8TEQ6|GEMI5_HUMAN	GEMI5_HUMAN	GEMIN5	2.62381	1.61982	0.251265	-1.05796
sp|Q9ULC3|RAB23_HUMAN	RAB23_HUMAN	RAB23	0	0	0.250831	0.403016
sp|Q8NBF2|NHLC2_HUMAN	NHLC2_HUMAN	NHLRC2	0	0	0.250324	0.312113
sp|P56182|RRP1_HUMAN	RRP1_HUMAN	RRP1	1.84016	1.35653	0.24845	-0.760304
sp|P02786|TFR1_HUMAN	TFR1_HUMAN	TFRC	0	0	0.246058	-0.712448
sp|P51970|NDUA8_HUMAN	NDUA8_HUMAN	NDUFA8	0	0	0.245182	0.395428
sp|Q14C86|GAPD1_HUMAN	GAPD1_HUMAN	GAPVD1	12.9962	3.60502	0.244631	1.14556
sp|P49792|RBP2_HUMAN	RBP2_HUMAN	RANBP2	2.53729	1.59289	0.243279	-1.20307
sp|P62249|RS16_HUMAN	RS16_HUMAN	RPS16	4.39056	2.09537	0.243215	-0.317133
sp|O75431|MTX2_HUMAN	MTX2_HUMAN	MTX2	3.32236	1.82273	0.241976	0.554079
sp|Q9Y6R0|NUMBL_HUMAN	NUMBL_HUMAN	NUMBL	0	0	0.241259	0.633221
sp|Q14152|EIF3A_HUMAN	EIF3A_HUMAN	EIF3A	0	0	0.2403	-0.454915
sp|Q9ULJ7|ANR50_HUMAN	ANR50_HUMAN	ANKRD50	0	0	0.238653	0.409544
sp|Q9H444|CHM4B_HUMAN	CHM4B_HUMAN	CHMP4B	2.94926	1.71734	0.237796	0.617515
sp|Q07820|MCL1_HUMAN	MCL1_HUMAN	MCL1	1.8655	1.36583	0.237659	0.587538
sp|Q7Z6Z7|HUWE1_HUMAN	HUWE1_HUMAN	HUWE1	8.9991	2.99985	0.235271	-0.904732
sp|Q9Y2R4|DDX52_HUMAN	DDX52_HUMAN	DDX52	1.13076	1.06337	0.234343	-0.58587
sp|Q15003|CND2_HUMAN	CND2_HUMAN	NCAPH	0	0	0.232683	-0.394434
sp|O95163|ELP1_HUMAN	ELP1_HUMAN	ELP1	0	0	0.232545	-0.59299
sp|Q5JTV8|TOIP1_HUMAN	TOIP1_HUMAN	TOR1AIP1	2.25495	1.50165	0.231169	-0.566031
sp|Q9UER7|DAXX_HUMAN	DAXX_HUMAN	DAXX	2.85572	1.68989	0.230921	0.724594
sp|Q9H3U1|UN45A_HUMAN	UN45A_HUMAN	UNC45A	4.41889	2.10212	0.230405	0.99653
sp|P51587|BRCA2_HUMAN	BRCA2_HUMAN	BRCA2	0	0	0.230268	0.52758
sp|P04075|ALDOA_HUMAN	ALDOA_HUMAN	ALDOA	2.46351	1.56956	0.229414	0.68942
sp|A3KMH1|VWA8_HUMAN	VWA8_HUMAN	VWA8	0	0	0.229329	-0.62283
sp|Q9Y520|PRC2C_HUMAN	PRC2C_HUMAN	PRRC2C	2.81581	1.67804	0.229023	-1.10775
sp|Q9UPN3|MACF1_HUMAN	MACF1_HUMAN	MACF1	3.18363	1.78427	0.227839	-0.970781
sp|P61026|RAB10_HUMAN	RAB10_HUMAN	RAB10	0	0	0.225905	-0.973997
sp|O43426|SYNJ1_HUMAN	SYNJ1_HUMAN	SYNJ1	3.66746	1.91506	0.225401	0.887481
sp|Q8N6R0|MET13_HUMAN	MET13_HUMAN	METTL13	1.08449	1.04139	0.224029	-0.48777
sp|Q1ED39|KNOP1_HUMAN	KNOP1_HUMAN	KNOP1	4.05536	2.01379	0.223248	0.686282
sp|P54578|UBP14_HUMAN	UBP14_HUMAN	USP14	0	0	0.221774	-0.490672
sp|Q8N2A8|PLD6_HUMAN	PLD6_HUMAN	PLD6	1.17553	1.08422	0.219638	0.555503
sp|Q9H7Z3|NRDE2_HUMAN	NRDE2_HUMAN	NRDE2	1.32307	1.15025	0.2181	-0.735203
sp|A6NKT7|RGPD3_HUMAN	RGPD3_HUMAN	#N/A	#N/A	#N/A	0.217518	-0.647803
sp|Q8WY36|BBX_HUMAN	BBX_HUMAN	BBX	3.20588	1.7905	0.217025	0.825119
sp|Q9BQA1|MEP50_HUMAN	MEP50_HUMAN	WDR77	0	0	0.214927	0.513185
sp|Q07812|BAX_HUMAN	BAX_HUMAN	BAX	2.01663	1.42008	0.214727	-0.776656
sp|P42566|EPS15_HUMAN	EPS15_HUMAN	EPS15	0	0	0.213764	-0.655753
sp|Q12959|DLG1_HUMAN	DLG1_HUMAN	DLG1	1.09924	1.04845	0.213343	-0.58101
sp|Q5JRA6|MIA3_HUMAN	MIA3_HUMAN	MIA3	1.16598	1.07981	0.212902	-0.774475
sp|Q9Y450|HBS1L_HUMAN	HBS1L_HUMAN	HBS1L	2.84555	1.68687	0.212456	-0.647828
sp|P35030|TRY3_HUMAN	TRY3_HUMAN	PRSS3	0	0	0.210943	-0.782688
sp|Q9P031|TAP26_HUMAN	TAP26_HUMAN	CCDC59	4.78683	2.18788	0.210785	0.822819
sp|Q63HN8|RN213_HUMAN	RN213_HUMAN	RNF213	1.6948	1.30184	0.210305	-0.603457
sp|P24928|RPB1_HUMAN	RPB1_HUMAN	POLR2A	1.92262	1.38659	0.20939	-0.849278
sp|O75369|FLNB_HUMAN	FLNB_HUMAN	FLNB	1.73639	1.31772	0.209212	-0.71564
sp|Q8IWX8|CHERP_HUMAN	CHERP_HUMAN	CHERP	1.61497	1.27081	0.209092	-0.553958
sp|Q59GN2|R39L5_HUMAN;sp|P62891|RL39_HUMAN	R39L5_HUMAN	RPL39P5	0	0	0.207947	-0.648504
sp|Q96SU4|OSBL9_HUMAN	OSBL9_HUMAN	OSBPL9	0	0	0.207558	0.308042
sp|Q9BPX6|MICU1_HUMAN	MICU1_HUMAN	MICU1	1.86143	1.36434	0.207223	-0.493095
sp|Q13492|PICAL_HUMAN	PICAL_HUMAN	PICALM	1.49125	1.22117	0.207167	0.47566
sp|P11532|DMD_HUMAN	DMD_HUMAN	DMD	0	0	0.206239	0.657767
sp|O15235|RT12_HUMAN	RT12_HUMAN	MRPS12	2.95385	1.71868	0.206236	-0.725433
sp|O75179|ANR17_HUMAN	ANR17_HUMAN	ANKRD17	3.63352	1.90618	0.206116	-0.880465
sp|O60841|IF2P_HUMAN	IF2P_HUMAN	EIF5B	3.39702	1.8431	0.205995	-0.684217
sp|Q86YS7|C2CD5_HUMAN	C2CD5_HUMAN	C2CD5	1.17684	1.08482	0.205826	-0.668096
sp|Q9NZ01|TECR_HUMAN	TECR_HUMAN	TECR	1.25227	1.11905	0.205732	-0.793524
sp|O75592|MYCB2_HUMAN	MYCB2_HUMAN	MYCBP2	1.66846	1.29169	0.205637	-0.860663
sp|Q15058|KIF14_HUMAN	KIF14_HUMAN	KIF14	2.30847	1.51936	0.205461	-0.947011
sp|Q9NNW5|WDR6_HUMAN	WDR6_HUMAN	WDR6	0	0	0.20475	-0.626825
sp|Q15907|RB11B_HUMAN	RB11B_HUMAN	RAB11B	0	0	0.204602	1.01238
sp|Q9BZF1|OSBL8_HUMAN	OSBL8_HUMAN	OSBPL8	0	0	0.204337	0.473032
sp|Q04721|NOTC2_HUMAN	NOTC2_HUMAN	NOTCH2	0.84303	0.918166	0.204308	-0.695384
sp|Q9NVI1|FANCI_HUMAN	FANCI_HUMAN	FANCI	1.41264	1.18855	0.203631	0.451101
sp|Q9NZC7|WWOX_HUMAN	WWOX_HUMAN	WWOX	3.70547	1.92496	0.203588	0.562413
sp|P11940|PABP1_HUMAN	PABP1_HUMAN	PABPC1	1.451	1.20458	0.20235	0.468749
sp|Q9Y5M8|SRPRB_HUMAN	SRPRB_HUMAN	SRPRB	0.825329	0.908476	0.2016	-0.796803
sp|P00338|LDHA_HUMAN	LDHA_HUMAN	LDHA	1.09323	1.04558	0.199974	-0.659006
sp|P63261|ACTG_HUMAN;sp|P60709|ACTB_HUMAN	ACTG_HUMAN	ACTG1	4.02609	2.00651	0.199857	-0.429498
sp|P49327|FAS_HUMAN	FAS_HUMAN	FASN	14.1758	3.76508	0.198074	0.360583
sp|Q5T3I0|GPTC4_HUMAN	GPTC4_HUMAN	GPATCH4	4.12807	2.03177	0.197182	0.575791
sp|Q07960|RHG01_HUMAN	RHG01_HUMAN	ARHGAP1	3.25919	1.80532	0.197022	-0.977775
sp|Q14103|HNRPD_HUMAN	HNRPD_HUMAN	HNRNPD	0	0	0.196916	0.358471
sp|Q9UL54|TAOK2_HUMAN	TAOK2_HUMAN	TAOK2	2.1152	1.45437	0.196148	0.731626
sp|P78527|PRKDC_HUMAN	PRKDC_HUMAN	PRKDC	9.71275	3.11653	0.195993	0.614834
sp|P10809|CH60_HUMAN	CH60_HUMAN	HSPD1	2.7705	1.66448	0.19597	-0.651587
sp|Q8N9N7|LRC57_HUMAN	LRC57_HUMAN	LRRC57	0	0	0.195962	0.471192
sp|Q96GA3|LTV1_HUMAN	LTV1_HUMAN	LTV1	2.77888	1.667	0.195861	0.706758
sp|Q13428|TCOF_HUMAN	TCOF_HUMAN	TCOF1	8.41578	2.901	0.195632	-0.316947
sp|Q14241|ELOA1_HUMAN	ELOA1_HUMAN	ELOA	4.16702	2.04133	0.19448	-0.791133
sp|P68363|TBA1B_HUMAN	TBA1B_HUMAN	TUBA1B	5.71138	2.38985	0.193993	-0.188965
sp|Q8NF91|SYNE1_HUMAN	SYNE1_HUMAN	SYNE1	3.53303	1.87964	0.193695	0.742645
sp|P25205|MCM3_HUMAN	MCM3_HUMAN	MCM3	1.77788	1.33337	0.193492	0.561852
sp|Q15643|TRIPB_HUMAN	TRIPB_HUMAN	TRIP11	6.33389	2.51672	0.193088	0.913369
sp|Q9Y4W6|AFG32_HUMAN	AFG32_HUMAN	AFG3L2	4.76663	2.18326	0.192973	0.664398
sp|P55010|IF5_HUMAN	IF5_HUMAN	EIF5	3.18876	1.78571	0.192884	-0.623139
sp|P49207|RL34_HUMAN	RL34_HUMAN	RPL34	2.94675	1.71661	0.190661	0.332786
sp|Q9H2J7|S6A15_HUMAN	S6A15_HUMAN	SLC6A15	4.39334	2.09603	0.190626	-0.372113
sp|P22102|PUR2_HUMAN	PUR2_HUMAN	GART	0	0	0.18947	-0.498449
sp|Q96MW1|CCD43_HUMAN	CCD43_HUMAN	CCDC43	0.820422	0.905772	0.188602	0.624393
sp|P84098|RL19_HUMAN	RL19_HUMAN	RPL19	5.77028	2.40214	0.187518	0.224442
sp|Q2M1P5|KIF7_HUMAN	KIF7_HUMAN	KIF7	2.61087	1.61582	0.187292	0.443962
sp|Q15648|MED1_HUMAN	MED1_HUMAN	MED1	0	0	0.187017	0.31358
sp|Q9BQ52|RNZ2_HUMAN	RNZ2_HUMAN	ELAC2	0	0	0.185675	0.473445
sp|Q9Y6K0|CEPT1_HUMAN	CEPT1_HUMAN	CEPT1	4.18015	2.04454	0.183793	-0.419882
sp|P52732|KIF11_HUMAN	KIF11_HUMAN	KIF11	0	0	0.183394	-0.539527
sp|Q12802|AKP13_HUMAN	AKP13_HUMAN	AKAP13	2.68966	1.64002	0.183224	0.726318
sp|P49790|NU153_HUMAN	NU153_HUMAN	NUP153	1.94623	1.39507	0.182945	-0.871273
sp|Q9P2J5|SYLC_HUMAN	SYLC_HUMAN	LARS	0	0	0.18232	-0.498988
sp|O76094|SRP72_HUMAN	SRP72_HUMAN	SRP72	0	0	0.182086	-0.468508
sp|P62266|RS23_HUMAN	RS23_HUMAN	RPS23	7.91578	2.8135	0.181931	0.281652
sp|A5YKK6|CNOT1_HUMAN	CNOT1_HUMAN	CNOT1	0	0	0.181372	-0.523906
sp|P51957|NEK4_HUMAN	NEK4_HUMAN	NEK4	0	0	0.181119	-0.281841
sp|Q15738|NSDHL_HUMAN	NSDHL_HUMAN	NSDHL	0.845451	0.919484	0.18054	-0.585438
sp|P46782|RS5_HUMAN	RS5_HUMAN	RPS5	3.48811	1.86765	0.179589	0.627898
sp|O15498|YKT6_HUMAN	YKT6_HUMAN	YKT6	6.74959	2.598	0.179283	0.24897
sp|Q16513|PKN2_HUMAN	PKN2_HUMAN	PKN2	1.29842	1.13948	0.179086	-0.570803
sp|O95292|VAPB_HUMAN	VAPB_HUMAN	VAPB	2.71786	1.64859	0.178911	0.513076
sp|O94991|SLIK5_HUMAN	SLIK5_HUMAN	SLITRK5	1.16591	1.07977	0.178587	0.598432
sp|Q9BRS2|RIOK1_HUMAN	RIOK1_HUMAN	RIOK1	4.63672	2.1533	0.178503	0.400808
sp|Q3ZCQ8|TIM50_HUMAN	TIM50_HUMAN	TIMM50	2.79821	1.67279	0.178428	0.526034
sp|P98170|XIAP_HUMAN	XIAP_HUMAN	XIAP	2.0428	1.42926	0.178155	-0.358109
sp|P18583|SON_HUMAN	SON_HUMAN	SON	5.81086	2.41057	0.177963	-0.364516
sp|P45880|VDAC2_HUMAN	VDAC2_HUMAN	VDAC2	0.973825	0.986826	0.177691	-0.695183
sp|P26374|RAE2_HUMAN	RAE2_HUMAN	CHML	1.81953	1.3489	0.175613	0.627764
sp|Q6Y7W6|GGYF2_HUMAN	GGYF2_HUMAN	GIGYF2	5.75988	2.39997	0.175515	0.590978
sp|Q93045|STMN2_HUMAN	STMN2_HUMAN	STMN2	0	0	0.175496	0.496403
sp|Q96C57|CL043_HUMAN	CL043_HUMAN	CUSTOS	0	0	0.175448	0.456708
sp|Q9UPQ9|TNR6B_HUMAN	TNR6B_HUMAN	TNRC6B	2.23085	1.4936	0.175016	0.354887
sp|P42766|RL35_HUMAN	RL35_HUMAN	RPL35	7.13456	2.67106	0.174289	0.226011
sp|P52292|IMA1_HUMAN	IMA1_HUMAN	KPNA2	1.38613	1.17734	0.174257	-0.451752
sp|Q9Y6Y8|S23IP_HUMAN	S23IP_HUMAN	SEC23IP	0.817478	0.904145	0.173645	-0.520646
sp|Q7Z478|DHX29_HUMAN	DHX29_HUMAN	DHX29	1.79929	1.34138	0.172958	-0.674548
sp|P62829|RL23_HUMAN	RL23_HUMAN	RPL23	5.2312	2.28718	0.172431	0.221781
sp|Q9UKE5|TNIK_HUMAN	TNIK_HUMAN	TNIK	4.03811	2.00951	0.172344	-0.339938
sp|Q13283|G3BP1_HUMAN	G3BP1_HUMAN	G3BP1	0	0	0.171986	-0.355299
sp|O60271|JIP4_HUMAN	JIP4_HUMAN	SPAG9	1.1318	1.06386	0.171661	-0.586864
sp|Q13085|ACACA_HUMAN	ACACA_HUMAN	ACACA	25.2656	5.02649	0.169891	0.301356
sp|Q13136|LIPA1_HUMAN	LIPA1_HUMAN	PPFIA1	0	0	0.16968	-0.44498
sp|P61081|UBC12_HUMAN	UBC12_HUMAN	UBE2M	1.02013	1.01002	0.168455	0.476346
sp|Q9HD67|MYO10_HUMAN	MYO10_HUMAN	MYO10	2.45799	1.5678	0.167782	0.564271
sp|O75694|NU155_HUMAN	NU155_HUMAN	NUP155	1.48567	1.21888	0.167283	-0.691676
sp|Q99996|AKAP9_HUMAN	AKAP9_HUMAN	AKAP9	6.70353	2.58912	0.167276	-0.818006
sp|Q04637|IF4G1_HUMAN	IF4G1_HUMAN	EIF4G1	5.86008	2.42076	0.167074	0.700422
sp|P05166|PCCB_HUMAN	PCCB_HUMAN	PCCB	5.27233	2.29616	0.167049	0.483064
sp|O75400|PR40A_HUMAN	PR40A_HUMAN	PRPF40A	3.28287	1.81187	0.166251	-0.620099
sp|Q7L804|RFIP2_HUMAN	RFIP2_HUMAN	RAB11FIP2	2.52204	1.58809	0.16574	0.489491
sp|Q9Y388|RBMX2_HUMAN	RBMX2_HUMAN	RBMX2	3.59643	1.89643	0.165374	0.47789
sp|O95486|SC24A_HUMAN	SC24A_HUMAN	SEC24A	0	0	0.16531	0.280208
sp|O75381|PEX14_HUMAN	PEX14_HUMAN	PEX14	2.88704	1.69913	0.165085	-0.57562
sp|P62424|RL7A_HUMAN	RL7A_HUMAN	RPL7A	3.20629	1.79061	0.164816	0.426488
sp|Q562R1|ACTBL_HUMAN	ACTBL_HUMAN	#N/A	#N/A	#N/A	0.164715	0.554517
sp|Q15311|RBP1_HUMAN	RBP1_HUMAN	RALBP1	2.12508	1.45776	0.164528	-0.577281
sp|P12277|KCRB_HUMAN	KCRB_HUMAN	CKB	2.13063	1.45967	0.164525	0.300816
sp|Q9Y4E8|UBP15_HUMAN	UBP15_HUMAN	USP15	4.56741	2.13715	0.163676	-0.730813
sp|P49069|CAMLG_HUMAN	CAMLG_HUMAN	CAMLG	0	0	0.161294	-0.483594
sp|Q8TCU4|ALMS1_HUMAN	ALMS1_HUMAN	ALMS1	6.95197	2.63666	0.161246	0.644507
sp|P62269|RS18_HUMAN	RS18_HUMAN	RPS18	2.51631	1.58629	0.160774	-0.435261
sp|P35611|ADDA_HUMAN	ADDA_HUMAN	ADD1	1.02698	1.0134	0.160502	-0.568739
sp|Q96AY4|TTC28_HUMAN	TTC28_HUMAN	TTC28	3.45726	1.85937	0.160325	-0.811449
sp|Q13427|PPIG_HUMAN	PPIG_HUMAN	PPIG	2.23385	1.49461	0.160206	-0.564998
sp|Q9P0K7|RAI14_HUMAN	RAI14_HUMAN	RAI14	4.14659	2.03632	0.160169	0.648156
sp|P53007|TXTP_HUMAN	TXTP_HUMAN	SLC25A1	0	0	0.159907	-0.520783
sp|O95373|IPO7_HUMAN	IPO7_HUMAN	IPO7	4.42687	2.10401	0.159681	0.663054
sp|Q8NBA8|DTWD2_HUMAN	DTWD2_HUMAN	DTWD2	0	0	0.158986	0.360739
sp|P49257|LMAN1_HUMAN	LMAN1_HUMAN	LMAN1	1.06907	1.03396	0.158065	-0.744575
sp|Q96S99|PKHF1_HUMAN	PKHF1_HUMAN	PLEKHF1	0	0	0.15775	0.395069
sp|Q9UBF2|COPG2_HUMAN	COPG2_HUMAN	COPG2	4.42509	2.10359	0.157016	0.556729
sp|Q96AG4|LRC59_HUMAN	LRC59_HUMAN	LRRC59	2.32119	1.52354	0.156255	0.367427
sp|Q8IWR0|Z3H7A_HUMAN	Z3H7A_HUMAN	ZC3H7A	0	0	0.155724	-0.326986
sp|Q9UBM7|DHCR7_HUMAN	DHCR7_HUMAN	DHCR7	6.33388	2.51672	0.155237	0.533181
sp|P05556|ITB1_HUMAN	ITB1_HUMAN	ITGB1	2.5262	1.5894	0.153573	-0.624685
sp|Q9C0C4|SEM4C_HUMAN	SEM4C_HUMAN	SEMA4C	0	0	0.152849	-0.454302
sp|Q5T5U3|RHG21_HUMAN	RHG21_HUMAN	ARHGAP21	0	0	0.151906	0.355756
sp|Q9NVN8|GNL3L_HUMAN	GNL3L_HUMAN	GNL3L	4.97264	2.22994	0.150347	-0.514592
sp|P16152|CBR1_HUMAN	CBR1_HUMAN	CBR1	6.155	2.48093	0.150318	0.603473
sp|Q15365|PCBP1_HUMAN	PCBP1_HUMAN	PCBP1	2.91374	1.70697	0.150007	0.232542
sp|P54136|SYRC_HUMAN	SYRC_HUMAN	RARS	0	0	0.149941	0.343221
sp|O95905|ECD_HUMAN	ECD_HUMAN	ECD	1.69803	1.30309	0.149853	0.38567
sp|P62847|RS24_HUMAN	RS24_HUMAN	RPS24	3.55256	1.88482	0.149209	-0.261428
sp|Q96EY4|TMA16_HUMAN	TMA16_HUMAN	TMA16	1.1725	1.08282	0.148937	0.582266
sp|P46108|CRK_HUMAN	CRK_HUMAN	CRK	3.88162	1.97018	0.148654	-0.342838
sp|P52429|DGKE_HUMAN	DGKE_HUMAN	DGKE	0	0	0.148506	-0.309697
sp|Q9Y4I1|MYO5A_HUMAN	MYO5A_HUMAN	MYO5A	1.3745	1.17239	0.148439	-0.325778
sp|Q7KZF4|SND1_HUMAN	SND1_HUMAN	SND1	3.71499	1.92743	0.148357	-0.579875
sp|Q8N0Z3|SPICE_HUMAN	SPICE_HUMAN	SPICE1	2.03471	1.42643	0.148271	-0.535789
sp|Q9Y266|NUDC_HUMAN	NUDC_HUMAN	NUDC	3.42977	1.85196	0.147856	-0.320592
sp|Q5T8P6|RBM26_HUMAN	RBM26_HUMAN	RBM26	1.48659	1.21926	0.147508	0.447481
sp|Q8NFA0|UBP32_HUMAN	UBP32_HUMAN	USP32	1.98511	1.40894	0.14741	0.340526
sp|Q96RL7|VP13A_HUMAN	VP13A_HUMAN	VPS13A	4.82558	2.19672	0.147144	0.669626
sp|Q5VV42|CDKAL_HUMAN	CDKAL_HUMAN	CDKAL1	0	0	0.14644	-0.464419
sp|O94874|UFL1_HUMAN	UFL1_HUMAN	UFL1	5.07669	2.25315	0.14637	0.526148
sp|Q8WTT2|NOC3L_HUMAN	NOC3L_HUMAN	NOC3L	4.39299	2.09595	0.146211	0.456097
sp|P42694|HELZ_HUMAN	HELZ_HUMAN	HELZ	0.970599	0.98519	0.1457	-0.466115
sp|Q07889|SOS1_HUMAN	SOS1_HUMAN	SOS1	0	0	0.14241	0.32383
sp|P48444|COPD_HUMAN	COPD_HUMAN	ARCN1	3.34322	1.82845	0.141836	0.458759
sp|Q68DQ2|CRBG3_HUMAN	CRBG3_HUMAN	CRYBG3	5.03583	2.24407	0.141506	-0.702487
sp|O43396|TXNL1_HUMAN	TXNL1_HUMAN	TXNL1	2.03954	1.42812	0.140169	0.537124
sp|Q9Y6I9|TX264_HUMAN	TX264_HUMAN	TEX264	8.39807	2.89794	0.139587	0.42602
sp|Q5VT25|MRCKA_HUMAN	MRCKA_HUMAN	CDC42BPA	5.84837	2.41834	0.13892	0.543856
sp|Q9Y4G8|RPGF2_HUMAN	RPGF2_HUMAN	RAPGEF2	0	0	0.138584	0.272407
sp|P11586|C1TC_HUMAN	C1TC_HUMAN	MTHFD1	2.68729	1.63929	0.13849	-0.545602
sp|Q9NVU7|SDA1_HUMAN	SDA1_HUMAN	SDAD1	3.08913	1.75759	0.138447	0.697943
sp|Q14739|LBR_HUMAN	LBR_HUMAN	LBR	5.20527	2.28151	0.13815	-0.415399
sp|Q96P47|AGAP3_HUMAN	AGAP3_HUMAN	AGAP3	3.05243	1.74712	0.137476	-0.401661
sp|P43121|MUC18_HUMAN	MUC18_HUMAN	MCAM	0	0	0.137118	-0.343399
sp|O43143|DHX15_HUMAN	DHX15_HUMAN	DHX15	3.98031	1.99507	0.137021	0.467415
sp|P28288|ABCD3_HUMAN	ABCD3_HUMAN	ABCD3	10.8827	3.2989	0.13669	0.198087
sp|Q96HE9|PRR11_HUMAN	PRR11_HUMAN	PRR11	2.10926	1.45233	0.135731	0.32311
sp|Q9Y5V3|MAGD1_HUMAN	MAGD1_HUMAN	MAGED1	1.455	1.20624	0.134373	0.259961
sp|Q32MZ4|LRRF1_HUMAN	LRRF1_HUMAN	LRRFIP1	1.86713	1.36643	0.13415	-0.324326
sp|P14209|CD99_HUMAN	CD99_HUMAN	CD99	0	0	0.134124	0.242639
sp|Q6R327|RICTR_HUMAN	RICTR_HUMAN	RICTOR	0	0	0.132794	0.299403
sp|Q9Y2J2|E41L3_HUMAN	E41L3_HUMAN	EPB41L3	4.73046	2.17496	0.131236	0.50089
sp|Q6W2J9|BCOR_HUMAN	BCOR_HUMAN	BCOR	0	0	0.130097	0.204024
sp|Q53H12|AGK_HUMAN	AGK_HUMAN	AGK	1.47846	1.21592	0.129744	0.461566
sp|O75915|PRAF3_HUMAN	PRAF3_HUMAN	ARL6IP5	0	0	0.1294	-0.394881
sp|Q13523|PRP4B_HUMAN	PRP4B_HUMAN	PRPF4B	0	0	0.129038	0.43737
sp|Q15836|VAMP3_HUMAN	VAMP3_HUMAN	VAMP3	2.16584	1.47168	0.128362	0.389673
sp|Q5JTH9|RRP12_HUMAN	RRP12_HUMAN	RRP12	8.83742	2.97278	0.12704	0.194227
sp|Q13162|PRDX4_HUMAN	PRDX4_HUMAN	PRDX4	0	0	0.124125	0.307849
sp|Q6P996|PDXD1_HUMAN	PDXD1_HUMAN	PDXDC1	4.68227	2.16386	0.122372	0.420568
sp|P46776|RL27A_HUMAN	RL27A_HUMAN	RPL27A	4.77794	2.18585	0.121382	0.180994
sp|P56192|SYMC_HUMAN	SYMC_HUMAN	MARS	0.785031	0.88602	0.118128	0.287711
sp|P50502|F10A1_HUMAN;sp|Q8NFI4|F10A5_HUMAN;sp|Q8IZP2|ST134_HUMAN	F10A1_HUMAN	ST13	1.17706	1.08492	0.117605	-0.405002
sp|Q14694|UBP10_HUMAN	UBP10_HUMAN	USP10	1.82818	1.3521	0.117573	-0.335949
sp|O75190|DNJB6_HUMAN	DNJB6_HUMAN	DNAJB6	0	0	0.117376	0.316817
sp|Q96RQ3|MCCA_HUMAN	MCCA_HUMAN	MCCC1	9.02419	3.00403	0.116275	0.417942
sp|Q96JQ2|CLMN_HUMAN	CLMN_HUMAN	CLMN	0	0	0.115018	-0.264233
sp|Q8TEY7|UBP33_HUMAN	UBP33_HUMAN	USP33	2.35619	1.53499	0.114366	0.193962
sp|O43592|XPOT_HUMAN	XPOT_HUMAN	XPOT	0.984217	0.992077	0.113452	0.296483
sp|Q9H4A3|WNK1_HUMAN	WNK1_HUMAN	WNK1	0	0	0.113169	0.291163
sp|P50402|EMD_HUMAN	EMD_HUMAN	EMD	1.32674	1.15184	0.111698	0.326271
sp|P15880|RS2_HUMAN	RS2_HUMAN	RPS2	2.28353	1.51114	0.111535	-0.2542
sp|Q9UG63|ABCF2_HUMAN	ABCF2_HUMAN	ABCF2	2.02474	1.42293	0.11086	-0.416337
sp|P52701|MSH6_HUMAN	MSH6_HUMAN	MSH6	3.24558	1.80155	0.110846	0.411945
sp|P40763|STAT3_HUMAN	STAT3_HUMAN	STAT3	2.13499	1.46116	0.110618	0.342231
sp|Q96A65|EXOC4_HUMAN	EXOC4_HUMAN	EXOC4	4.88742	2.21075	0.110394	0.385272
sp|Q01968|OCRL_HUMAN	OCRL_HUMAN	OCRL	1.52478	1.23482	0.109997	0.437753
sp|Q13625|ASPP2_HUMAN	ASPP2_HUMAN	TP53BP2	2.04211	1.42903	0.108715	0.346663
sp|Q96ME7|ZN512_HUMAN	ZN512_HUMAN	ZNF512	2.34123	1.53011	0.108116	-0.286675
sp|Q9NUQ8|ABCF3_HUMAN	ABCF3_HUMAN	ABCF3	8.42094	2.90189	0.10772	0.172149
sp|Q9Y383|LC7L2_HUMAN	LC7L2_HUMAN	LUC7L2	6.29053	2.50809	0.106992	0.449086
sp|Q8WW12|PCNP_HUMAN	PCNP_HUMAN	PCNP	0	0	0.105522	-0.293966
sp|Q00341|VIGLN_HUMAN	VIGLN_HUMAN	HDLBP	6.35279	2.52047	0.105059	0.509477
sp|Q9Y4P3|TBL2_HUMAN	TBL2_HUMAN	TBL2	4.34233	2.08383	0.105041	0.366264
sp|P46779|RL28_HUMAN	RL28_HUMAN	RPL28	3.04337	1.74453	0.104865	0.189869
sp|Q9UNZ2|NSF1C_HUMAN	NSF1C_HUMAN	NSFL1C	0	0	0.104759	0.2599
sp|P39023|RL3_HUMAN	RL3_HUMAN	RPL3	2.60951	1.6154	0.104552	-0.344342
sp|Q96BY7|ATG2B_HUMAN	ATG2B_HUMAN	ATG2B	2.45592	1.56714	0.104401	0.487385
sp|Q9NZM3|ITSN2_HUMAN	ITSN2_HUMAN	ITSN2	0	0	0.103923	-0.267904
sp|E9PAV3|NACAM_HUMAN;sp|Q13765|NACA_HUMAN	NACAM_HUMAN	NACA	0	0	0.10292	-0.422295
sp|Q96S66|CLCC1_HUMAN	CLCC1_HUMAN	CLCC1	3.72807	1.93082	0.102459	0.453465
sp|Q6GYQ0|RGPA1_HUMAN	RGPA1_HUMAN	RALGAPA1	0	0	0.102342	-0.250071
sp|Q9Y613|FHOD1_HUMAN	FHOD1_HUMAN	FHOD1	0	0	0.101939	-0.240432
sp|O14980|XPO1_HUMAN	XPO1_HUMAN	XPO1	0.893602	0.945305	0.101871	0.282185
sp|O60645|EXOC3_HUMAN	EXOC3_HUMAN	EXOC3	0	0	0.100633	-0.23615
sp|Q8TBA6|GOGA5_HUMAN	GOGA5_HUMAN	GOLGA5	4.05419	2.0135	0.0979395	0.421977
sp|Q9NV70|EXOC1_HUMAN	EXOC1_HUMAN	EXOC1	0	0	0.0971782	0.265683
sp|Q9H501|ESF1_HUMAN	ESF1_HUMAN	ESF1	0	0	0.0971382	-0.273495
sp|P82094|TMF1_HUMAN	TMF1_HUMAN	TMF1	1.55947	1.24879	0.0970534	-0.346161
sp|P16333|NCK1_HUMAN	NCK1_HUMAN	NCK1	1.99929	1.41396	0.0969785	0.291025
sp|O95573|ACSL3_HUMAN	ACSL3_HUMAN	ACSL3	3.90369	1.97578	0.0968536	-0.377795
sp|P63173|RL38_HUMAN	RL38_HUMAN	RPL38	2.84518	1.68677	0.096445	0.334769
sp|Q8WWM7|ATX2L_HUMAN	ATX2L_HUMAN	ATXN2L	2.66545	1.63262	0.0959341	0.34397
sp|O14531|DPYL4_HUMAN	DPYL4_HUMAN	DPYSL4	3.62244	1.90327	0.0957832	-0.206498
sp|A1X283|SPD2B_HUMAN	SPD2B_HUMAN	SH3PXD2B	1.96789	1.40281	0.0943351	-0.280586
sp|Q5VZ89|DEN4C_HUMAN	DEN4C_HUMAN	DENND4C	3.62415	1.90372	0.0936823	0.428917
sp|P51530|DNA2_HUMAN	DNA2_HUMAN	DNA2	0	0	0.0936154	-0.164801
sp|P14625|ENPL_HUMAN	ENPL_HUMAN	HSP90B1	1.80251	1.34258	0.0917844	-0.331387
sp|O15440|MRP5_HUMAN	MRP5_HUMAN	ABCC5	1.85078	1.36043	0.0916813	-0.29284
sp|Q02952|AKA12_HUMAN	AKA12_HUMAN	AKAP12	3.44365	1.85571	0.0911206	-0.425186
sp|P62258|1433E_HUMAN	1433E_HUMAN	YWHAE	1.12804	1.06209	0.0905311	-0.2512
sp|Q9NQC3|RTN4_HUMAN	RTN4_HUMAN	RTN4	4.77356	2.18485	0.0904455	0.405381
sp|P42704|LPPRC_HUMAN	LPPRC_HUMAN	LRPPRC	3.45104	1.8577	0.0897204	-0.466824
sp|O95861|BPNT1_HUMAN	BPNT1_HUMAN	BPNT1	2.94333	1.71561	0.0892525	0.244802
sp|Q9Y265|RUVB1_HUMAN	RUVB1_HUMAN	RUVBL1	3.13951	1.77187	0.0887344	0.349928
sp|P18621|RL17_HUMAN	RL17_HUMAN	RPL17	4.00069	2.00017	0.087836	0.0977402
sp|Q8IZJ1|UNC5B_HUMAN	UNC5B_HUMAN	UNC5B	0.876452	0.93619	0.0877533	-0.347092
sp|P62937|PPIA_HUMAN	PPIA_HUMAN	PPIA	0.932798	0.965815	0.0865371	-0.271264
sp|P62820|RAB1A_HUMAN	RAB1A_HUMAN	RAB1A	4.1245	2.03089	0.0864694	-0.257897
sp|Q9GZR7|DDX24_HUMAN	DDX24_HUMAN	DDX24	2.26102	1.50367	0.0857412	-0.363442
sp|Q9HCU5|PREB_HUMAN	PREB_HUMAN	PREB	2.95766	1.71978	0.0855858	0.281236
sp|Q9BWH2|FUND2_HUMAN	FUND2_HUMAN	FUNDC2	2.69207	1.64075	0.0848712	0.199049
sp|Q5VT06|CE350_HUMAN	CE350_HUMAN	CEP350	1.6996	1.30369	0.0848559	0.299434
sp|P06576|ATPB_HUMAN	ATPB_HUMAN	ATP5F1B	3.58937	1.89456	0.0846056	-0.239331
sp|P42356|PI4KA_HUMAN	PI4KA_HUMAN	PI4KA	9.68836	3.11261	0.0844427	0.180786
sp|Q9HCM4|E41L5_HUMAN	E41L5_HUMAN	EPB41L5	3.36587	1.83463	0.0844217	0.294412
sp|P00558|PGK1_HUMAN	PGK1_HUMAN	PGK1	4.0939	2.02334	0.0841525	-0.119815
sp|P11171|41_HUMAN	41_HUMAN	EPB41	5.11305	2.26121	0.0838204	0.347874
sp|P16949|STMN1_HUMAN	STMN1_HUMAN	STMN1	0.959163	0.979369	0.0830104	0.256444
sp|O60343|TBCD4_HUMAN	TBCD4_HUMAN	TBC1D4	0	0	0.0829843	-0.246456
sp|Q4KWH8|PLCH1_HUMAN	PLCH1_HUMAN	PLCH1	0	0	0.0826252	0.155195
sp|P49454|CENPF_HUMAN	CENPF_HUMAN	CENPF	1.93192	1.38994	0.0823975	-0.295429
sp|O95487|SC24B_HUMAN	SC24B_HUMAN	SEC24B	2.28641	1.51209	0.082077	-0.275649
sp|Q8IWB9|TEX2_HUMAN	TEX2_HUMAN	TEX2	1.57127	1.2535	0.0812188	0.195469
sp|Q07020|RL18_HUMAN	RL18_HUMAN	RPL18	1.49021	1.22074	0.0794695	0.28673
sp|Q9BVP2|GNL3_HUMAN	GNL3_HUMAN	GNL3	9.65904	3.1079	0.0792278	-0.10079
sp|P38432|COIL_HUMAN	COIL_HUMAN	COIL	0	0	0.0783517	0.170271
sp|O00443|P3C2A_HUMAN	P3C2A_HUMAN	PIK3C2A	3.91207	1.9779	0.0773616	-0.355198
sp|Q5TC12|ATPF1_HUMAN	ATPF1_HUMAN	ATPAF1	2.3406	1.5299	0.077245	0.271308
sp|Q13439|GOGA4_HUMAN	GOGA4_HUMAN	GOLGA4	7.02441	2.65036	0.074608	0.462197
sp|P51648|AL3A2_HUMAN	AL3A2_HUMAN	ALDH3A2	3.90189	1.97532	0.0744244	-0.0874099
sp|Q8NEY1|NAV1_HUMAN	NAV1_HUMAN	NAV1	1.94458	1.39448	0.0734627	-0.18569
sp|Q99961|SH3G1_HUMAN	SH3G1_HUMAN	SH3GL1	9.80852	3.13186	0.0724691	0.201314
sp|Q58EX7|PKHG4_HUMAN	PKHG4_HUMAN	PLEKHG4	0	0	0.0724273	0.144791
sp|P36542|ATPG_HUMAN	ATPG_HUMAN	ATP5F1C	1.68608	1.29849	0.071906	-0.273765
sp|Q9NWT8|AKIP_HUMAN	AKIP_HUMAN	AURKAIP1	0	0	0.0713335	-0.313696
sp|P62244|RS15A_HUMAN	RS15A_HUMAN	RPS15A	1.64357	1.28202	0.0698495	-0.274962
sp|Q9P2D1|CHD7_HUMAN	CHD7_HUMAN	CHD7	6.05185	2.46005	0.0695516	-0.117335
sp|Q00325|MPCP_HUMAN	MPCP_HUMAN	SLC25A3	3.81188	1.9524	0.0694758	-0.169618
sp|P09874|PARP1_HUMAN	PARP1_HUMAN	PARP1	4.37262	2.09108	0.0692939	0.144348
sp|O75376|NCOR1_HUMAN	NCOR1_HUMAN	NCOR1	1.94109	1.39323	0.0682289	-0.240129
sp|O75691|UTP20_HUMAN	UTP20_HUMAN	UTP20	5.53573	2.35281	0.0670063	-0.278641
sp|Q9NS69|TOM22_HUMAN	TOM22_HUMAN	TOMM22	1.14005	1.06773	0.0654815	0.225406
sp|P26641|EF1G_HUMAN	EF1G_HUMAN	EEF1G	2.49289	1.57889	0.0651566	-0.141182
sp|O95819|M4K4_HUMAN	M4K4_HUMAN	MAP4K4	1.63867	1.28011	0.0648894	-0.266452
sp|Q9UPW5|CBPC1_HUMAN	CBPC1_HUMAN	AGTPBP1	3.98534	1.99633	0.0646764	0.214885
sp|Q9NR12|PDLI7_HUMAN	PDLI7_HUMAN	PDLIM7	0	0	0.0627287	-0.128552
sp|P61513|RL37A_HUMAN	RL37A_HUMAN	RPL37A	4.73331	2.17562	0.0625532	0.172007
sp|Q99614|TTC1_HUMAN	TTC1_HUMAN	TTC1	1.88383	1.37253	0.0622332	0.20359
sp|Q14157|UBP2L_HUMAN	UBP2L_HUMAN	UBAP2L	3.08771	1.75719	0.061606	0.266439
sp|Q709C8|VP13C_HUMAN	VP13C_HUMAN	VPS13C	4.94249	2.22317	0.0615279	-0.326117
sp|Q12923|PTN13_HUMAN	PTN13_HUMAN	PTPN13	6.90639	2.628	0.0608136	0.27373
sp|P49411|EFTU_HUMAN	EFTU_HUMAN	TUFM	2.95742	1.71972	0.0602716	-0.170897
sp|P42677|RS27_HUMAN	RS27_HUMAN	RPS27	3.7753	1.94301	0.0597771	0.116274
sp|Q7Z4H7|HAUS6_HUMAN	HAUS6_HUMAN	HAUS6	4.59941	2.14462	0.0597749	0.340957
sp|Q9BSJ8|ESYT1_HUMAN	ESYT1_HUMAN	ESYT1	5.46886	2.33856	0.0597385	0.256839
sp|Q92900|RENT1_HUMAN	RENT1_HUMAN	UPF1	1.32325	1.15033	0.0595082	0.199573
sp|P62753|RS6_HUMAN	RS6_HUMAN	RPS6	6.60258	2.56955	0.057606	0.0792378
sp|P23396|RS3_HUMAN	RS3_HUMAN	RPS3	3.07926	1.75478	0.0575809	-0.207759
sp|P62910|RL32_HUMAN	RL32_HUMAN	RPL32	2.33622	1.52847	0.0575285	-0.172577
sp|Q9P035|HACD3_HUMAN	HACD3_HUMAN	HACD3	3.09825	1.76018	0.0566595	-0.0907785
sp|P43487|RANG_HUMAN	RANG_HUMAN	RANBP1	0	0	0.0561396	0.257565
sp|O75534|CSDE1_HUMAN	CSDE1_HUMAN	CSDE1	4.48215	2.11711	0.0556024	0.270536
sp|Q9NRZ9|HELLS_HUMAN	HELLS_HUMAN	HELLS	0	0	0.0554464	0.194461
sp|Q9UPP1|PHF8_HUMAN	PHF8_HUMAN	PHF8	0.989925	0.99495	0.0553016	0.164326
sp|Q9NRN7|ADPPT_HUMAN	ADPPT_HUMAN	AASDHPPT	0	0	0.0549369	-0.109904
sp|Q86UL3|GPAT4_HUMAN	GPAT4_HUMAN	GPAT4	0	0	0.0548391	0.199494
sp|Q86XL3|ANKL2_HUMAN	ANKL2_HUMAN	ANKLE2	1.70359	1.30522	0.0547753	0.194905
sp|Q15366|PCBP2_HUMAN	PCBP2_HUMAN	PCBP2	2.58331	1.60727	0.0543572	0.135594
sp|Q08378|GOGA3_HUMAN	GOGA3_HUMAN	GOLGA3	0	0	0.0538906	-0.161862
sp|P50851|LRBA_HUMAN	LRBA_HUMAN	LRBA	5.66156	2.3794	0.0537374	-0.27813
sp|Q9Y2L1|RRP44_HUMAN	RRP44_HUMAN	DIS3	0	0	0.0534754	0.158934
sp|Q92692|NECT2_HUMAN	NECT2_HUMAN	NECTIN2	0	0	0.0531031	0.115774
sp|P49458|SRP09_HUMAN	SRP09_HUMAN	SRP9	0	0	0.051931	-0.130574
sp|P21127|CD11B_HUMAN;sp|Q9UQ88|CD11A_HUMAN	CD11B_HUMAN	CDK11B	0	0	0.051676	0.152099
sp|P48735|IDHP_HUMAN	IDHP_HUMAN	IDH2	3.86295	1.96544	0.0511897	0.0975559
sp|Q6UB99|ANR11_HUMAN	ANR11_HUMAN	ANKRD11	8.62847	2.93743	0.0510647	0.263679
sp|Q9Y3F4|STRAP_HUMAN	STRAP_HUMAN	STRAP	0	0	0.0504264	-0.133194
sp|P26373|RL13_HUMAN	RL13_HUMAN	RPL13	4.27944	2.06868	0.0504228	-0.0849136
sp|O00410|IPO5_HUMAN	IPO5_HUMAN	IPO5	1.01797	1.00895	0.0494324	-0.148583
sp|P47712|PA24A_HUMAN	PA24A_HUMAN	PLA2G4A	2.01532	1.41962	0.0488283	-0.153533
sp|Q96JH7|VCIP1_HUMAN	VCIP1_HUMAN	VCPIP1	4.52394	2.12696	0.0485381	0.25794
sp|P51003|PAPOA_HUMAN	PAPOA_HUMAN	PAPOLA	1.31843	1.14823	0.0482621	0.122116
sp|Q8N5K1|CISD2_HUMAN	CISD2_HUMAN	CISD2	1.63974	1.28052	0.0478731	-0.176215
sp|P30101|PDIA3_HUMAN	PDIA3_HUMAN	PDIA3	0	0	0.0477683	-0.0780451
sp|Q9P0L0|VAPA_HUMAN	VAPA_HUMAN	VAPA	0	0	0.0472376	-0.181296
sp|Q14974|IMB1_HUMAN	IMB1_HUMAN	KPNB1	2.24221	1.4974	0.0471236	0.175066
sp|Q9NWB6|ARGL1_HUMAN	ARGL1_HUMAN	ARGLU1	2.06769	1.43795	0.0452831	0.199675
sp|Q9NQV6|PRD10_HUMAN	PRD10_HUMAN	PRDM10	0	0	0.0450273	0.0707826
sp|O94826|TOM70_HUMAN	TOM70_HUMAN	TOMM70	3.8059	1.95087	0.0446372	0.130623
sp|Q9BXS9|S26A6_HUMAN	S26A6_HUMAN	SLC26A6	0	0	0.0446282	-0.126241
sp|Q16891|MIC60_HUMAN	MIC60_HUMAN	IMMT	0	0	0.0446084	-0.159943
sp|P40855|PEX19_HUMAN	PEX19_HUMAN	PEX19	4.97218	2.22984	0.0445382	0.17301
sp|Q9H2M9|RBGPR_HUMAN	RBGPR_HUMAN	RAB3GAP2	4.28758	2.07065	0.0442752	0.209384
sp|P49006|MRP_HUMAN	MRP_HUMAN	MARCKSL1	2.39663	1.54811	0.0440168	0.103058
sp|Q9UPQ3|AGAP1_HUMAN	AGAP1_HUMAN	AGAP1	2.72166	1.64974	0.0437582	-0.152713
sp|Q8IWZ3|ANKH1_HUMAN	ANKH1_HUMAN	ANKHD1	5.00241	2.23661	0.0429337	-0.253923
sp|P09543|CN37_HUMAN	CN37_HUMAN	CNP	10.7639	3.28084	0.0428851	0.105684
sp|Q9NRY4|RHG35_HUMAN	RHG35_HUMAN	ARHGAP35	2.95534	1.71911	0.0424125	0.173815
sp|Q9NVP1|DDX18_HUMAN	DDX18_HUMAN	DDX18	3.50568	1.87234	0.0416024	-0.198616
sp|Q13371|PHLP_HUMAN	PHLP_HUMAN	PDCL	2.27202	1.50732	0.0403338	0.173984
sp|P68371|TBB4B_HUMAN	TBB4B_HUMAN	TUBB4B	5.8083	2.41004	0.0392587	-0.0811796
sp|Q9NZJ5|E2AK3_HUMAN	E2AK3_HUMAN	EIF2AK3	2.24243	1.49747	0.0380766	-0.107811
sp|O00763|ACACB_HUMAN	ACACB_HUMAN	ACACB	11.2025	3.34701	0.0380451	-0.214801
sp|P63244|RACK1_HUMAN	RACK1_HUMAN	RACK1	2.22164	1.49052	0.0357231	-0.143529
sp|Q9Y6M5|ZNT1_HUMAN	ZNT1_HUMAN	SLC30A1	0	0	0.035714	0.0898514
sp|P07437|TBB5_HUMAN	TBB5_HUMAN	TUBB	6.01354	2.45225	0.0349613	0.0780566
sp|P57088|TMM33_HUMAN	TMM33_HUMAN	TMEM33	0	0	0.0346481	-0.086141
sp|Q9Y3P9|RBGP1_HUMAN	RBGP1_HUMAN	RABGAP1	1.3597	1.16606	0.0344031	-0.111489
sp|Q9HAV4|XPO5_HUMAN	XPO5_HUMAN	XPO5	3.1945	1.78732	0.0337184	-0.0460101
sp|Q9BXB4|OSB11_HUMAN	OSB11_HUMAN	OSBPL11	0	0	0.0330189	-0.0893008
sp|Q9BQ48|RM34_HUMAN	RM34_HUMAN	MRPL34	0	0	0.0329849	-0.121066
sp|Q9UHN6|TMEM2_HUMAN	TMEM2_HUMAN	CEMIP2	0	0	0.0314409	-0.0534585
sp|P43003|EAA1_HUMAN	EAA1_HUMAN	SLC1A3	0	0	0.0294825	0.0572179
sp|Q9NZ45|CISD1_HUMAN	CISD1_HUMAN	CISD1	2.89289	1.70085	0.0294681	0.075795
sp|Q9H4L5|OSBL3_HUMAN	OSBL3_HUMAN	OSBPL3	3.74853	1.93611	0.0294363	0.118747
sp|Q92574|TSC1_HUMAN	TSC1_HUMAN	TSC1	8.11666	2.84897	0.0291722	-0.0879138
sp|P08240|SRPRA_HUMAN	SRPRA_HUMAN	SRPRA	2.85118	1.68855	0.0287594	-0.119395
sp|O60884|DNJA2_HUMAN	DNJA2_HUMAN	DNAJA2	0	0	0.0287365	-0.0793385
sp|Q9HDC5|JPH1_HUMAN	JPH1_HUMAN	JPH1	3.75761	1.93846	0.0284992	-0.0805842
sp|P46109|CRKL_HUMAN	CRKL_HUMAN	CRKL	4.01308	2.00327	0.0284958	-0.0841685
sp|Q15233|NONO_HUMAN	NONO_HUMAN	NONO	0	0	0.0283984	-0.118988
sp|Q13596|SNX1_HUMAN	SNX1_HUMAN	SNX1	1.43602	1.19834	0.0280161	-0.115641
sp|Q9UNF1|MAGD2_HUMAN	MAGD2_HUMAN	MAGED2	4.77816	2.1859	0.0277197	0.0958362
sp|Q9NYJ8|TAB2_HUMAN	TAB2_HUMAN	TAB2	1.89309	1.3759	0.027546	0.0698855
sp|Q13464|ROCK1_HUMAN	ROCK1_HUMAN	ROCK1	1.95856	1.39949	0.0274856	0.102197
sp|P12270|TPR_HUMAN	TPR_HUMAN	TPR	8.02907	2.83356	0.0273352	-0.0990984
sp|Q7Z4Q2|HEAT3_HUMAN	HEAT3_HUMAN	HEATR3	26.075	5.10637	0.0267673	0.0483745
sp|Q92625|ANS1A_HUMAN	ANS1A_HUMAN	ANKS1A	1.96788	1.40281	0.0262765	0.0910754
sp|P23284|PPIB_HUMAN	PPIB_HUMAN	PPIB	0	0	0.0262485	-0.0706657
sp|O75152|ZC11A_HUMAN	ZC11A_HUMAN	ZC3H11A	1.71668	1.31022	0.0257178	-0.0974125
sp|P13639|EF2_HUMAN	EF2_HUMAN	EEF2	4.16866	2.04173	0.0254752	-0.0600532
sp|P10599|THIO_HUMAN	THIO_HUMAN	TXN	0	0	0.0254676	-0.0644488
sp|Q99755|PI51A_HUMAN	PI51A_HUMAN	PIP5K1A	1.24214	1.11451	0.0242554	-0.0934381
sp|P55060|XPO2_HUMAN	XPO2_HUMAN	CSE1L	2.27002	1.50666	0.0241115	0.0809958
sp|O95202|LETM1_HUMAN	LETM1_HUMAN	LETM1	8.3778	2.89444	0.0240995	0.11379
sp|P35268|RL22_HUMAN	RL22_HUMAN	RPL22	4.59483	2.14355	0.0233978	-0.0925506
sp|O00541|PESC_HUMAN	PESC_HUMAN	PES1	2.96855	1.72295	0.0233335	-0.0851583
sp|Q9NZN5|ARHGC_HUMAN	ARHGC_HUMAN	ARHGEF12	0	0	0.0231164	-0.0735261
sp|P08865|RSSA_HUMAN	RSSA_HUMAN	RPSA	3.26672	1.80741	0.0229346	0.0533029
sp|Q14789|GOGB1_HUMAN	GOGB1_HUMAN	GOLGB1	10.2366	3.19946	0.0222089	0.116543
sp|P46939|UTRO_HUMAN	UTRO_HUMAN	UTRN	7.31882	2.70533	0.0221744	0.131805
sp|Q9NU22|MDN1_HUMAN	MDN1_HUMAN	MDN1	4.70137	2.16826	0.0218878	-0.110268
sp|Q99442|SEC62_HUMAN	SEC62_HUMAN	SEC62	1.87205	1.36823	0.0216134	0.107614
sp|Q8N5G2|MACOI_HUMAN	MACOI_HUMAN	MACO1	0	0	0.0214801	-0.0720918
sp|P05165|PCCA_HUMAN	PCCA_HUMAN	PCCA	17.2986	4.15915	0.0209141	-0.12737
sp|Q02790|FKBP4_HUMAN	FKBP4_HUMAN	FKBP4	0	0	0.0208665	-0.0666197
sp|Q9BRX8|F213A_HUMAN	F213A_HUMAN	FAM213A	0	0	0.0200863	-0.0360996
sp|O95613|PCNT_HUMAN	PCNT_HUMAN	PCNT	1.8648	1.36558	0.0194439	0.0969156
sp|Q9BZF9|UACA_HUMAN	UACA_HUMAN	UACA	2.97304	1.72425	0.0185268	-0.0768513
sp|Q09666|AHNK_HUMAN	AHNK_HUMAN	AHNAK	10.5148	3.24266	0.0179214	-0.0799186
sp|P30048|PRDX3_HUMAN	PRDX3_HUMAN	PRDX3	1.19389	1.09265	0.0177284	0.0564723
sp|O14617|AP3D1_HUMAN	AP3D1_HUMAN	AP3D1	5.23347	2.28768	0.0173562	-0.0307762
sp|O14966|RAB7L_HUMAN	RAB7L_HUMAN	RAB29	2.33398	1.52774	0.017266	0.0536791
sp|Q8NC51|PAIRB_HUMAN	PAIRB_HUMAN	SERBP1	3.76809	1.94116	0.0168965	-0.0715542
sp|P27816|MAP4_HUMAN	MAP4_HUMAN	MAP4	3.69678	1.9227	0.016884	0.0821418
sp|Q86SQ0|PHLB2_HUMAN	PHLB2_HUMAN	PHLDB2	0.765315	0.874823	0.0166533	0.0648858
sp|Q5SW79|CE170_HUMAN	CE170_HUMAN	CEP170	3.34005	1.82758	0.0165228	-0.0899491
sp|A0FGR8|ESYT2_HUMAN	ESYT2_HUMAN	ESYT2	3.28361	1.81207	0.0160912	-0.0592079
sp|O75533|SF3B1_HUMAN	SF3B1_HUMAN	SF3B1	0.930504	0.964626	0.0155387	-0.0469237
sp|Q9BTX1|NDC1_HUMAN	NDC1_HUMAN	NDC1	3.47364	1.86377	0.0148939	0.0731348
sp|Q16543|CDC37_HUMAN	CDC37_HUMAN	CDC37	3.18598	1.78493	0.0147699	-0.0389354
sp|Q9GZZ1|NAA50_HUMAN	NAA50_HUMAN	NAA50	0	0	0.0145202	-0.023771
sp|Q9H3N1|TMX1_HUMAN	TMX1_HUMAN	TMX1	0.791853	0.889861	0.0143983	-0.0702555
sp|P11274|BCR_HUMAN	BCR_HUMAN	BCR	4.27882	2.06853	0.0137665	-0.0627539
sp|Q8IWS0|PHF6_HUMAN	PHF6_HUMAN	PHF6	7.86694	2.80481	0.0137608	-0.0579956
sp|P51149|RAB7A_HUMAN	RAB7A_HUMAN	RAB7A	13.4477	3.66711	0.0136879	-0.0685245
sp|Q9UNY4|TTF2_HUMAN	TTF2_HUMAN	TTF2	0	0	0.0132729	-0.0445042
sp|Q9BZF3|OSBL6_HUMAN	OSBL6_HUMAN	OSBPL6	2.59462	1.61078	0.0129454	-0.0531801
sp|O15126|SCAM1_HUMAN	SCAM1_HUMAN	SCAMP1	0	0	0.0123758	-0.0455843
sp|Q7Z6J0|SH3R1_HUMAN	SH3R1_HUMAN	SH3RF1	0	0	0.0117386	0.0272187
sp|Q7Z569|BRAP_HUMAN	BRAP_HUMAN	BRAP	1.09114	1.04458	0.0113635	0.0340051
sp|P63241|IF5A1_HUMAN;sp|Q6IS14|IF5AL_HUMAN;sp|Q9GZV4|IF5A2_HUMAN	IF5A1_HUMAN	EIF5A	0.70539	0.839875	0.0112531	0.0374612
sp|P07305|H10_HUMAN	H10_HUMAN	H1F0	2.00296	1.41526	0.0109371	0.0494809
sp|Q8WVM8|SCFD1_HUMAN	SCFD1_HUMAN	SCFD1	0	0	0.0108531	-0.0244379
sp|Q06830|PRDX1_HUMAN	PRDX1_HUMAN	PRDX1	2.54406	1.59501	0.0106753	-0.0198653
sp|P25098|ARBK1_HUMAN	ARBK1_HUMAN	GRK2	0	0	0.0102497	-0.0170167
sp|P62861|RS30_HUMAN	RS30_HUMAN	FAU	3.76077	1.93927	0.0102018	0.0202525
sp|O95248|MTMR5_HUMAN	MTMR5_HUMAN	SBF1	2.18145	1.47697	0.00849238	-0.0410899
sp|Q99733|NP1L4_HUMAN	NP1L4_HUMAN	NAP1L4	9.35567	3.0587	0.00840281	-0.0279335
sp|Q8NBN3|TM87A_HUMAN	TM87A_HUMAN	TMEM87A	2.65988	1.63091	0.00789491	0.0350918
sp|Q07065|CKAP4_HUMAN	CKAP4_HUMAN	CKAP4	5.42084	2.32827	0.00499263	0.0146742
sp|Q14139|UBE4A_HUMAN	UBE4A_HUMAN	UBE4A	0	0	0.00461006	0.0162982
sp|P22681|CBL_HUMAN	CBL_HUMAN	CBL	1.19721	1.09417	0.00447327	0.013091
sp|Q9BXF6|RFIP5_HUMAN	RFIP5_HUMAN	RAB11FIP5	2.91367	1.70695	0.00434822	-0.0189473
sp|Q9BQG0|MBB1A_HUMAN	MBB1A_HUMAN	MYBBP1A	8.738	2.95601	0.00260155	-0.00476205
sp|Q15042|RB3GP_HUMAN	RB3GP_HUMAN	RAB3GAP1	1.99787	1.41346	0.00172887	-0.00882119
sp|P49757|NUMB_HUMAN	NUMB_HUMAN	NUMB	3.63569	1.90675	0.00159588	0.00654483
sp|Q16650|TBR1_HUMAN	TBR1_HUMAN	TBR1	0	0	0.00155959	0.00362073
sp|P62750|RL23A_HUMAN	RL23A_HUMAN	RPL23A	4.88639	2.21052	0.00135701	0.00202803
sp|O60488|ACSL4_HUMAN	ACSL4_HUMAN	ACSL4	2.54744	1.59607	0.000697714	-0.00195045
sp|Q8NE71|ABCF1_HUMAN	ABCF1_HUMAN	#N/A	4.15662	2.03878	0.000484281	-0.0015199
sp|Q9BVC6|TM109_HUMAN	TM109_HUMAN	TMEM109	0	0	0.000422151	0.00112747
sp|Q2M2I8|AAK1_HUMAN	AAK1_HUMAN	#N/A	1.63223	1.27759	0.000175609	0.000520325

## Sheet: Rab5 QL
Majority protein IDs	Uniprot	Gene NAME	WD score	Root WD score	-Log Student's T-test p-value Rab5 QL	Student's T-test Difference Rab5 QL
sp|Q9UKG1|DP13A_HUMAN	DP13A_HUMAN	APPL1	19402.5	139.293	28.1172	10.3011
sp|Q15075|EEA1_HUMAN	EEA1_HUMAN	EEA1	6940.29	83.3084	27.9845	11.3856
sp|Q8NEU8|DP13B_HUMAN	DP13B_HUMAN	APPL2	15820.2	125.779	22.0383	8.49818
sp|Q8N3P4|VPS8_HUMAN	VPS8_HUMAN	VPS8	7791.39	88.2689	21.8599	9.50429
sp|P42858|HD_HUMAN	HD_HUMAN	HTT	3110.79	55.7745	20.6646	9.63135
sp|A0JNW5|UH1BL_HUMAN	UH1BL_HUMAN	UHRF1BP1L	556.733	23.5952	19.7882	8.68746
sp|Q9BV73|CP250_HUMAN	CP250_HUMAN	CEP250	368.2	19.1885	18.7927	9.04591
sp|Q8NEB9|PK3C3_HUMAN	PK3C3_HUMAN	PIK3C3	13612	116.67	18.391	7.27814
sp|Q96SU4|OSBL9_HUMAN	OSBL9_HUMAN	OSBPL9	1254.53	35.4194	17.4819	8.58513
sp|Q99570|PI3R4_HUMAN	PI3R4_HUMAN	PIK3R4	911.474	30.1906	17.0121	8.67585
sp|Q96PE3|INP4A_HUMAN	INP4A_HUMAN	INPP4A	6610.74	81.3064	16.0204	6.13404
sp|Q9UJC3|HOOK1_HUMAN	HOOK1_HUMAN	HOOK1	5359.21	73.2066	15.4202	5.90122
sp|Q9H1K0|RBNS5_HUMAN	RBNS5_HUMAN	RBSN	484.034	22.0008	15.3932	8.51464
sp|Q9H270|VPS11_HUMAN	VPS11_HUMAN	VPS11	10757	103.716	15.1802	5.8362
sp|Q9NRW7|VPS45_HUMAN	VPS45_HUMAN	VPS45	10960.2	104.691	14.518	6.51693
sp|Q9P1Z2|CACO1_HUMAN	CACO1_HUMAN	CALCOCO1	558.121	23.6246	14.0863	5.59586
sp|P32019|I5P2_HUMAN	I5P2_HUMAN	INPP5B	2661.95	51.5941	13.7992	6.41531
sp|Q9BXB4|OSB11_HUMAN	OSB11_HUMAN	OSBPL11	113.675	10.6618	13.6872	9.09566
sp|Q96T51|RUFY1_HUMAN	RUFY1_HUMAN	RUFY1	103.286	10.163	12.5391	5.67092
sp|Q96F24|NRBF2_HUMAN	NRBF2_HUMAN	NRBF2	2128.56	46.1363	12.4722	6.24482
sp|Q9P2Y5|UVRAG_HUMAN	UVRAG_HUMAN	UVRAG	8945.08	94.5784	12.1239	4.48829
sp|Q05DH4|F16A1_HUMAN	F16A1_HUMAN	FAM160A1	7833.57	88.5075	11.6829	4.91516
sp|Q15276|RABE1_HUMAN	RABE1_HUMAN	RABEP1	348.405	18.6656	11.3822	10.7551
sp|Q96S38|KS6C1_HUMAN	KS6C1_HUMAN	RPS6KC1	487.702	22.084	11.1324	4.78617
sp|Q6ZMI0|PPR21_HUMAN	PPR21_HUMAN	PPP1R21	11012.2	104.939	10.9095	6.00857
sp|Q5VU43|MYOME_HUMAN	MYOME_HUMAN	PDE4DIP	784.479	28.0086	10.5493	4.87267
sp|P12268|IMDH2_HUMAN	IMDH2_HUMAN	IMPDH2	618.195	24.8635	10.501	5.12096
sp|Q8N612|F16A2_HUMAN	F16A2_HUMAN	FAM160A2	7780.53	88.2073	10.2065	3.95021
sp|P49815|TSC2_HUMAN	TSC2_HUMAN	TSC2	1183.5	34.4021	9.7086	6.32632
sp|Q92574|TSC1_HUMAN	TSC1_HUMAN	TSC1	137.799	11.7388	9.66262	8.28407
sp|Q9H269|VPS16_HUMAN	VPS16_HUMAN	VPS16	454.58	21.3209	9.19699	3.7801
sp|Q9UPU7|TBD2B_HUMAN	TBD2B_HUMAN	TBC1D2B	36.2351	6.01956	9.08852	7.07367
sp|Q92622|RUBIC_HUMAN	RUBIC_HUMAN	RUBCN	662.09	25.7311	8.95345	3.91825
sp|Q96AX1|VP33A_HUMAN	VP33A_HUMAN	VPS33A	6159.73	78.484	8.76183	3.92535
sp|Q9Y4E6|WDR7_HUMAN	WDR7_HUMAN	WDR7	1882.19	43.3842	8.59268	4.25824
sp|Q9Y2H2|SAC2_HUMAN	SAC2_HUMAN	INPP5F	42.5918	6.52624	7.46513	7.66264
sp|P20339|RAB5A_HUMAN	RAB5A_HUMAN	RAB5A	5662.09	75.2468	7.28033	13.8445
sp|Q9BZH6|WDR11_HUMAN	WDR11_HUMAN	WDR11	320.951	17.9151	7.15771	4.57405
sp|O15040|TCPR2_HUMAN	TCPR2_HUMAN	TECPR2	8699.52	93.2712	6.83277	3.76526
sp|Q01968|OCRL_HUMAN	OCRL_HUMAN	OCRL	23.8455	4.88318	6.22404	8.37875
sp|Q9UJ41|RABX5_HUMAN	RABX5_HUMAN	RABGEF1	198.636	14.0938	6.14652	5.30329
sp|Q15042|RB3GP_HUMAN	RB3GP_HUMAN	RAB3GAP1	48.2771	6.94817	5.57866	8.91536
sp|Q66GS9|CP135_HUMAN	CP135_HUMAN	CEP135	4.90972	2.21579	5.50426	2.975
sp|Q9P2D6|F135A_HUMAN	F135A_HUMAN	FAM135A	204.044	14.2844	5.2763	6.36961
sp|Q9H2M9|RBGPR_HUMAN	RBGPR_HUMAN	RAB3GAP2	27.5065	5.24467	5.26003	8.58796
sp|P98170|XIAP_HUMAN	XIAP_HUMAN	XIAP	161.887	12.7235	5.19554	3.16101
sp|Q9P253|VPS18_HUMAN	VPS18_HUMAN	VPS18	9204.34	95.9393	5.0781	2.82242
sp|P14174|MIF_HUMAN	MIF_HUMAN	MIF	0	0	4.33248	2.86011
sp|Q9C037|TRIM4_HUMAN	TRIM4_HUMAN	TRIM4	96.9171	9.84465	4.1794	2.27209
sp|Q8TC07|TBC15_HUMAN	TBC15_HUMAN	TBC1D15	16.7519	4.0929	3.80665	6.21996
sp|P12532|KCRU_HUMAN	KCRU_HUMAN	CKMT1A	79.7162	8.92839	3.74157	2.75274
sp|Q9P2R3|ANFY1_HUMAN	ANFY1_HUMAN	ANKFY1	10354.6	101.758	3.66974	3.12334
sp|Q66K14|TBC9B_HUMAN	TBC9B_HUMAN	TBC1D9B	52.9873	7.27924	3.42984	2.82845
sp|O60841|IF2P_HUMAN	IF2P_HUMAN	EIF5B	0.8495	0.921683	3.32246	-5.63737
sp|Q9H5N1|RABE2_HUMAN	RABE2_HUMAN	RABEP2	405.036	20.1255	3.31115	2.25454
sp|P60174|TPIS_HUMAN	TPIS_HUMAN	TPI1	4.91936	2.21796	3.30563	1.95732
sp|O00148|DX39A_HUMAN;sp|Q13838|DX39B_HUMAN	DX39A_HUMAN	DDX39A	0	0	3.27216	2.21752
sp|Q8TB36|GDAP1_HUMAN	GDAP1_HUMAN	GDAP1	44.8895	6.69996	3.20532	2.97065
sp|Q6WKZ4|RFIP1_HUMAN	RFIP1_HUMAN	RAB11FIP1	1.4318	1.19658	3.05087	-5.08644
sp|P56589|PEX3_HUMAN	PEX3_HUMAN	PEX3	34.379	5.86336	3.03655	4.11053
sp|P26374|RAE2_HUMAN	RAE2_HUMAN	CHML	16.6956	4.08602	2.93279	4.82589
sp|Q9NQG6|MID51_HUMAN	MID51_HUMAN	MIEF1	12.5467	3.54213	2.74284	3.94405
sp|O60271|JIP4_HUMAN	JIP4_HUMAN	SPAG9	22.6102	4.75502	2.70102	4.59657
sp|Q99961|SH3G1_HUMAN	SH3G1_HUMAN	SH3GL1	31.9991	5.65677	2.65073	3.36754
sp|Q15084|PDIA6_HUMAN	PDIA6_HUMAN	PDIA6	12.1644	3.48774	2.63304	2.13929
sp|A4D1P6|WDR91_HUMAN	WDR91_HUMAN	WDR91	191.597	13.8419	2.62922	2.03954
sp|O75691|UTP20_HUMAN	UTP20_HUMAN	UTP20	2.17123	1.47351	2.61995	-4.81055
sp|Q9HAD4|WDR41_HUMAN	WDR41_HUMAN	WDR41	13.3771	3.65747	2.60057	4.28107
sp|Q96AG3|S2546_HUMAN	S2546_HUMAN	SLC25A46	57.4833	7.58177	2.60047	3.22183
sp|P09429|HMGB1_HUMAN;sp|B2RPK0|HGB1A_HUMAN	HMGB1_HUMAN	HMGB1	0	0	2.57186	2.18532
sp|Q9P035|HACD3_HUMAN	HACD3_HUMAN	HACD3	1.83083	1.35308	2.49509	-1.78027
sp|Q8IYU8|MICU2_HUMAN	MICU2_HUMAN	MICU2	0	0	2.37205	-2.39923
sp|Q9P260|K1468_HUMAN	K1468_HUMAN	RELCH	781.221	27.9503	2.35412	2.01155
sp|Q16181|SEPT7_HUMAN	SEPT7_HUMAN	SEPTIN7	0	0	2.34813	1.78713
sp|Q6P444|MTFR2_HUMAN	MTFR2_HUMAN	MTFR2	179.479	13.397	2.34043	3.11643
sp|Q4V328|GRAP1_HUMAN	GRAP1_HUMAN	GRIPAP1	3.25959	1.80543	2.33126	1.65009
sp|Q9NQC7|CYLD_HUMAN	CYLD_HUMAN	CYLD	17.3661	4.16726	2.31701	3.27497
sp|P46783|RS10_HUMAN	RS10_HUMAN	RPS10	4.61854	2.14908	2.10597	1.54235
sp|Q13459|MYO9B_HUMAN	MYO9B_HUMAN	MYO9B	1.6848	1.298	2.05588	-4.2351
sp|Q96A33|CCD47_HUMAN	CCD47_HUMAN	CCDC47	1.46354	1.20977	2.02338	-3.9283
sp|Q00325|MPCP_HUMAN	MPCP_HUMAN	SLC25A3	1.79347	1.3392	2.0119	-2.54591
sp|Q5SQN1|SNP47_HUMAN	SNP47_HUMAN	SNAP47	56.081	7.48872	2.00953	3.12798
sp|Q99996|AKAP9_HUMAN	AKAP9_HUMAN	AKAP9	34.956	5.91236	1.99798	5.02255
sp|Q8WU79|SMAP2_HUMAN	SMAP2_HUMAN	SMAP2	2.94437	1.71592	1.98345	2.1108
sp|P04075|ALDOA_HUMAN	ALDOA_HUMAN	ALDOA	30.6398	5.53532	1.95271	3.27461
sp|Q9UPQ3|AGAP1_HUMAN	AGAP1_HUMAN	AGAP1	0	0	1.90662	-3.3223
sp|Q658Y4|F91A1_HUMAN	F91A1_HUMAN	FAM91A1	9.3238	3.05349	1.84671	3.9882
sp|Q01650|LAT1_HUMAN	LAT1_HUMAN	SLC7A5	0.653322	0.808283	1.84383	-3.90824
sp|Q13428|TCOF_HUMAN	TCOF_HUMAN	TCOF1	5.458	2.33624	1.84335	-1.64536
sp|Q9Y2W6|TDRKH_HUMAN	TDRKH_HUMAN	TDRKH	5.95702	2.4407	1.83619	1.6189
sp|Q12923|PTN13_HUMAN	PTN13_HUMAN	PTPN13	2.53311	1.59158	1.83561	-4.50047
sp|P26641|EF1G_HUMAN	EF1G_HUMAN	EEF1G	17.0135	4.12474	1.82916	2.01881
sp|Q9UER7|DAXX_HUMAN	DAXX_HUMAN	DAXX	0.724116	0.85095	1.81317	-3.44349
sp|Q8NAN2|MIGA1_HUMAN	MIGA1_HUMAN	MIGA1	7.77226	2.78788	1.8	5.05592
sp|Q9H4L5|OSBL3_HUMAN	OSBL3_HUMAN	OSBPL3	0	0	1.774	-3.49593
sp|P50914|RL14_HUMAN	RL14_HUMAN	RPL14	7.90391	2.81139	1.77311	1.91361
sp|P16333|NCK1_HUMAN	NCK1_HUMAN	NCK1	30.3618	5.51015	1.7679	2.46976
sp|Q70CQ3|UBP30_HUMAN	UBP30_HUMAN	USP30	3.98319	1.99579	1.7389	3.30216
sp|Q02224|CENPE_HUMAN	CENPE_HUMAN	CENPE	135.952	11.6599	1.73826	2.40015
sp|P17987|TCPA_HUMAN	TCPA_HUMAN	TCP1	1.15142	1.07304	1.73158	-3.56535
sp|P05388|RLA0_HUMAN;sp|Q8NHW5|RLA0L_HUMAN	RLA0_HUMAN	RPLP0	6.52396	2.5542	1.72981	1.86479
sp|P23381|SYWC_HUMAN	SYWC_HUMAN	WARS	24.1064	4.90983	1.71125	1.92367
sp|Q14457|BECN1_HUMAN	BECN1_HUMAN	BECN1	15.4627	3.93227	1.70355	1.20627
sp|O75400|PR40A_HUMAN	PR40A_HUMAN	PRPF40A	0.627103	0.791898	1.70236	-3.72207
sp|Q02952|AKA12_HUMAN	AKA12_HUMAN	AKAP12	2.31161	1.5204	1.65581	-3.90078
sp|P18124|RL7_HUMAN	RL7_HUMAN	RPL7	22.6265	4.75673	1.64209	2.22393
sp|P08865|RSSA_HUMAN	RSSA_HUMAN	RPSA	4.61984	2.14938	1.6212	2.03691
sp|Q9BXF6|RFIP5_HUMAN	RFIP5_HUMAN	RAB11FIP5	0.629982	0.793714	1.61178	-3.0468
sp|P36542|ATPG_HUMAN	ATPG_HUMAN	ATP5F1C	1.37497	1.17259	1.5921	-3.17351
sp|O75915|PRAF3_HUMAN	PRAF3_HUMAN	ARL6IP5	0	0	1.56468	-2.76395
sp|P18031|PTN1_HUMAN	PTN1_HUMAN	PTPN1	4.27367	2.06728	1.54666	1.31681
sp|P60842|IF4A1_HUMAN	IF4A1_HUMAN	EIF4A1	7.79862	2.7926	1.5362	2.79117
sp|Q96CS3|FAF2_HUMAN	FAF2_HUMAN	FAF2	3.62921	1.90505	1.52407	2.49568
sp|Q8N6T3|ARFG1_HUMAN	ARFG1_HUMAN	ARFGAP1	3.95248	1.98808	1.52218	2.7885
sp|P13861|KAP2_HUMAN	KAP2_HUMAN	PRKAR2A	5.44345	2.33312	1.51071	3.26958
sp|P51610|HCFC1_HUMAN	HCFC1_HUMAN	HCFC1	1.43353	1.1973	1.4993	-3.89774
sp|Q13371|PHLP_HUMAN	PHLP_HUMAN	PDCL	5.18471	2.277	1.47929	3.40572
sp|O95819|M4K4_HUMAN	M4K4_HUMAN	MAP4K4	0.855769	0.925078	1.47478	-3.12643
sp|Q9H3S7|PTN23_HUMAN	PTN23_HUMAN	PTPN23	9.74142	3.12113	1.46779	2.56633
sp|P55011|S12A2_HUMAN	S12A2_HUMAN	SLC12A2	1.74957	1.32271	1.46629	-2.03451
sp|P60866|RS20_HUMAN	RS20_HUMAN	RPS20	1.26574	1.12505	1.46564	-3.09192
sp|P49006|MRP_HUMAN	MRP_HUMAN	MARCKSL1	24.369	4.9365	1.45141	1.79137
sp|Q9UH65|SWP70_HUMAN	SWP70_HUMAN	SWAP70	3.84457	1.96076	1.44146	1.39897
sp|Q9HCK8|CHD8_HUMAN	CHD8_HUMAN	CHD8	0.59438	0.770961	1.42921	-4.86546
sp|Q709C8|VP13C_HUMAN	VP13C_HUMAN	VPS13C	40.4956	6.36361	1.4224	4.05696
sp|P62424|RL7A_HUMAN	RL7A_HUMAN	RPL7A	27.585	5.25214	1.41848	2.46433
sp|Q15390|MTFR1_HUMAN	MTFR1_HUMAN	MTFR1	9.06083	3.01012	1.41793	2.91311
sp|Q5TC12|ATPF1_HUMAN	ATPF1_HUMAN	ATPAF1	4.63534	2.15298	1.41169	2.51252
sp|Q6FI81|CPIN1_HUMAN	CPIN1_HUMAN	CIAPIN1	5.90654	2.43034	1.40756	2.24871
sp|P12277|KCRB_HUMAN	KCRB_HUMAN	CKB	27.0204	5.19811	1.40002	1.53018
sp|Q9Y2X3|NOP58_HUMAN	NOP58_HUMAN	NOP58	0	0	1.39849	-2.57478
sp|P62249|RS16_HUMAN	RS16_HUMAN	RPS16	3.19012	1.78609	1.39581	-1.14772
sp|O60664|PLIN3_HUMAN	PLIN3_HUMAN	PLIN3	4.02563	2.0064	1.38186	1.43353
sp|P62913|RL11_HUMAN	RL11_HUMAN	RPL11	1.73887	1.31866	1.38045	-1.78822
sp|P09622|DLDH_HUMAN	DLDH_HUMAN	DLD	0	0	1.3713	1.14093
sp|Q8N2F6|ARM10_HUMAN	ARM10_HUMAN	ARMC10	3.96593	1.99146	1.36852	2.68786
sp|Q96L93|KI16B_HUMAN	KI16B_HUMAN	KIF16B	2.898	1.70235	1.36827	1.36048
sp|Q14839|CHD4_HUMAN	CHD4_HUMAN	CHD4	1.90189	1.37909	1.36482	-3.2079
sp|Q96LT7|CI072_HUMAN	CI072_HUMAN	C9orf72	134.471	11.5962	1.36334	1.61064
sp|Q8N2A8|PLD6_HUMAN	PLD6_HUMAN	PLD6	7.07696	2.66025	1.3602	2.09686
sp|Q9NP61|ARFG3_HUMAN	ARFG3_HUMAN	ARFGAP3	9.56392	3.09256	1.35782	2.07981
sp|Q9BRX8|F213A_HUMAN	F213A_HUMAN	FAM213A	2.21593	1.4886	1.33722	1.38392
sp|Q8IWS0|PHF6_HUMAN	PHF6_HUMAN	PHF6	2.88539	1.69864	1.3167	-2.75662
sp|Q8IXI1|MIRO2_HUMAN	MIRO2_HUMAN	RHOT2	4.5708	2.13794	1.31322	2.66911
sp|P06733|ENOA_HUMAN	ENOA_HUMAN	ENO1	4.32909	2.08065	1.30853	2.68608
sp|Q13442|HAP28_HUMAN	HAP28_HUMAN	PDAP1	0	0	1.3056	1.57943
sp|P33176|KINH_HUMAN	KINH_HUMAN	KIF5B	14.2987	3.78136	1.30011	2.83398
sp|P11532|DMD_HUMAN	DMD_HUMAN	DMD	0	0	1.29674	2.62651
sp|Q8NI27|THOC2_HUMAN	THOC2_HUMAN	THOC2	0	0	1.29435	-2.96287
sp|P40926|MDHM_HUMAN	MDHM_HUMAN	MDH2	17.8406	4.22381	1.29369	2.31979
sp|O14737|PDCD5_HUMAN	PDCD5_HUMAN	PDCD5	14.1991	3.76817	1.28822	1.41972
sp|Q9UPP1|PHF8_HUMAN	PHF8_HUMAN	PHF8	0	0	1.28579	-2.03421
sp|O00429|DNM1L_HUMAN	DNM1L_HUMAN	DNM1L	9.35182	3.05807	1.28282	1.68366
sp|O43399|TPD54_HUMAN	TPD54_HUMAN	TPD52L2	36.0432	6.0036	1.26708	1.44162
sp|Q8IWJ2|GCC2_HUMAN	GCC2_HUMAN	GCC2	17.2251	4.15032	1.2589	3.88979
sp|Q15417|CNN3_HUMAN	CNN3_HUMAN	CNN3	4.73697	2.17646	1.25282	2.82406
sp|Q9NVH0|EXD2_HUMAN	EXD2_HUMAN	EXD2	6.91536	2.62971	1.24823	1.20316
sp|Q13162|PRDX4_HUMAN	PRDX4_HUMAN	PRDX4	0	0	1.2423	1.76391
sp|P11940|PABP1_HUMAN	PABP1_HUMAN	PABPC1	13.378	3.65759	1.2329	1.76979
sp|Q9BZF9|UACA_HUMAN	UACA_HUMAN	UACA	1.60128	1.26542	1.22243	-2.96154
sp|O60238|BNI3L_HUMAN	BNI3L_HUMAN	BNIP3L	6.88539	2.624	1.22056	1.53691
sp|Q9UQ80|PA2G4_HUMAN	PA2G4_HUMAN	PA2G4	49.4946	7.03524	1.21533	1.67153
sp|Q9H0A0|NAT10_HUMAN	NAT10_HUMAN	NAT10	1.69805	1.30309	1.20242	-2.86026
sp|Q9GZR7|DDX24_HUMAN	DDX24_HUMAN	DDX24	0.942451	0.970799	1.1844	-2.83512
sp|P07195|LDHB_HUMAN	LDHB_HUMAN	LDHB	13.335	3.65171	1.1696	2.31932
sp|Q9HCN4|GPN1_HUMAN	GPN1_HUMAN	GPN1	0	0	1.16433	1.13036
sp|P0DMV9|HS71B_HUMAN;sp|P0DMV8|HS71A_HUMAN	HS71B_HUMAN	HSPA1B	0	0	1.16023	-1.65729
sp|Q9Y3L5|RAP2C_HUMAN	RAP2C_HUMAN	RAP2C	0	0	1.15836	1.86503
sp|P62263|RS14_HUMAN	RS14_HUMAN	RPS14	2.02644	1.42353	1.14655	-2.02292
sp|Q9Y6M7|S4A7_HUMAN	S4A7_HUMAN	SLC4A7	0.721143	0.849201	1.13999	-3.02311
sp|Q9UQN3|CHM2B_HUMAN	CHM2B_HUMAN	CHMP2B	3.78464	1.94541	1.13925	2.32361
sp|Q9BRS2|RIOK1_HUMAN	RIOK1_HUMAN	RIOK1	2.66366	1.63207	1.13483	-1.69564
sp|P36405|ARL3_HUMAN	ARL3_HUMAN	ARL3	0	0	1.13202	1.04109
sp|Q14331|FRG1_HUMAN	FRG1_HUMAN	FRG1	0	0	1.1179	-2.14228
sp|Q8TCG1|CIP2A_HUMAN	CIP2A_HUMAN	CIP2A	5.88928	2.42678	1.11586	2.47398
sp|Q8WUX9|CHMP7_HUMAN	CHMP7_HUMAN	CHMP7	22.5823	4.75209	1.09869	1.77499
sp|Q9HCM4|E41L5_HUMAN	E41L5_HUMAN	EPB41L5	0.953463	0.976454	1.09423	-2.47731
sp|P34897|GLYM_HUMAN	GLYM_HUMAN	SHMT2	10.1895	3.1921	1.08962	1.48421
sp|Q9C026|TRIM9_HUMAN	TRIM9_HUMAN	TRIM9	4.85115	2.20253	1.0874	1.02567
sp|Q9Y385|UB2J1_HUMAN	UB2J1_HUMAN	UBE2J1	0	0	1.08454	-2.30245
sp|Q96A49|SYAP1_HUMAN	SYAP1_HUMAN	SYAP1	4.43927	2.10696	1.08353	1.96654
sp|P23284|PPIB_HUMAN	PPIB_HUMAN	PPIB	2.86746	1.69336	1.08207	1.72074
sp|O15027|SC16A_HUMAN	SC16A_HUMAN	SEC16A	0.610189	0.781146	1.07947	-2.33322
sp|Q9HAV4|XPO5_HUMAN	XPO5_HUMAN	XPO5	0	0	1.0775	-0.90858
sp|Q9P2D0|IBTK_HUMAN	IBTK_HUMAN	IBTK	0	0	1.0712	0.804434
sp|Q07065|CKAP4_HUMAN	CKAP4_HUMAN	CKAP4	3.9629	1.9907	1.07104	-1.8003
sp|P50747|BPL1_HUMAN	BPL1_HUMAN	HLCS	6.72836	2.59391	1.06817	2.22702
sp|Q14684|RRP1B_HUMAN	RRP1B_HUMAN	RRP1B	4.41713	2.1017	1.06669	-1.23591
sp|Q9GZY8|MFF_HUMAN	MFF_HUMAN	MFF	4.07767	2.01932	1.06547	2.51886
sp|P24534|EF1B_HUMAN	EF1B_HUMAN	EEF1B2	9.172	3.02853	1.06405	1.05921
sp|P62851|RS25_HUMAN	RS25_HUMAN	RPS25	2.01954	1.42111	1.05504	-1.6528
sp|P17066|HSP76_HUMAN	HSP76_HUMAN	HSPA6	0	0	1.05244	-1.58885
sp|P62280|RS11_HUMAN	RS11_HUMAN	RPS11	2.44207	1.56271	1.05106	-2.4492
sp|Q9UKA2|FBXL4_HUMAN	FBXL4_HUMAN	FBXL4	40.53	6.36632	1.04916	1.5311
sp|Q5T8D3|ACBD5_HUMAN	ACBD5_HUMAN	ACBD5	7.98134	2.82513	1.04651	2.15835
sp|P42695|CNDD3_HUMAN	CNDD3_HUMAN	NCAPD3	0	0	1.04282	-1.54281
sp|P05387|RLA2_HUMAN	RLA2_HUMAN	RPLP2	13.3238	3.65018	1.03862	1.18071
sp|Q8TEV9|SMCR8_HUMAN	SMCR8_HUMAN	SMCR8	6.08124	2.46602	1.03663	3.10406
sp|Q9Y4P8|WIPI2_HUMAN	WIPI2_HUMAN	WIPI2	3.74788	1.93594	1.03404	2.46969
sp|P35658|NU214_HUMAN	NU214_HUMAN	NUP214	0	0	1.03384	-2.04113
sp|Q15208|STK38_HUMAN	STK38_HUMAN	STK38	14.6361	3.82572	1.02885	2.12953
sp|Q12983|BNIP3_HUMAN	BNIP3_HUMAN	BNIP3	1.29525	1.13809	1.02644	1.85987
sp|P22392|NDKB_HUMAN;sp|O60361|NDK8_HUMAN	NDKB_HUMAN	NME2	14.1029	3.75539	1.0067	2.34926
sp|P62820|RAB1A_HUMAN	RAB1A_HUMAN	RAB1A	3.74399	1.93494	1.00629	1.93789
sp|P08670|VIME_HUMAN	VIME_HUMAN	VIM	47.7089	6.90716	0.985357	1.564
sp|Q9UNX4|WDR3_HUMAN	WDR3_HUMAN	WDR3	0	0	0.984686	-1.65274
sp|P02786|TFR1_HUMAN	TFR1_HUMAN	TFRC	0.822479	0.906906	0.976148	-1.87405
sp|Q8TCU4|ALMS1_HUMAN	ALMS1_HUMAN	ALMS1	0.647483	0.804664	0.972889	-2.62454
sp|P62753|RS6_HUMAN	RS6_HUMAN	RPS6	4.69082	2.16583	0.969258	-0.804219
sp|Q9Y520|PRC2C_HUMAN	PRC2C_HUMAN	PRRC2C	0.715216	0.845704	0.964602	-3.17759
sp|P30048|PRDX3_HUMAN	PRDX3_HUMAN	PRDX3	4.93767	2.22209	0.960095	1.56156
sp|Q70E73|RAPH1_HUMAN	RAPH1_HUMAN	RAPH1	0.808793	0.899329	0.954678	-2.2725
sp|Q9BZF1|OSBL8_HUMAN	OSBL8_HUMAN	OSBPL8	0	0	0.9544	-1.67222
sp|Q9ULM3|YETS2_HUMAN	YETS2_HUMAN	YEATS2	0.792432	0.890186	0.949911	-2.60215
sp|P42766|RL35_HUMAN	RL35_HUMAN	RPL35	4.81714	2.1948	0.948719	0.834435
sp|Q92968|PEX13_HUMAN	PEX13_HUMAN	PEX13	16.2437	4.03035	0.941973	1.54519
sp|O43143|DHX15_HUMAN	DHX15_HUMAN	DHX15	0	0	0.94053	-2.19807
sp|P14618|KPYM_HUMAN	KPYM_HUMAN	PKM	17.4586	4.17835	0.92834	1.84573
sp|P09884|DPOLA_HUMAN	DPOLA_HUMAN	POLA1	0	0	0.919024	0.897054
sp|P00338|LDHA_HUMAN	LDHA_HUMAN	LDHA	2.56386	1.60121	0.917963	2.0226
sp|P63010|AP2B1_HUMAN	AP2B1_HUMAN	AP2B1	0	0	0.915769	-1.49305
sp|P50990|TCPQ_HUMAN	TCPQ_HUMAN	CCT8	8.62815	2.93737	0.913459	-1.2096
sp|Q9BVP2|GNL3_HUMAN	GNL3_HUMAN	GNL3	7.77787	2.78888	0.909618	-0.726185
sp|P21397|AOFA_HUMAN	AOFA_HUMAN	MAOA	5.09942	2.25819	0.907016	-3.80923
sp|P61081|UBC12_HUMAN	UBC12_HUMAN	UBE2M	6.80786	2.60919	0.905887	1.77515
sp|Q8IVF7|FMNL3_HUMAN	FMNL3_HUMAN	FMNL3	1.08012	1.03929	0.90182	-2.45012
sp|O43933|PEX1_HUMAN	PEX1_HUMAN	PEX1	5.83082	2.41471	0.900266	2.26683
sp|Q2TBE0|C19L2_HUMAN	C19L2_HUMAN	CWF19L2	0	0	0.889355	1.07327
sp|Q92878|RAD50_HUMAN	RAD50_HUMAN	RAD50	0.679041	0.824039	0.88815	-2.18759
sp|Q8WVM8|SCFD1_HUMAN	SCFD1_HUMAN	SCFD1	1.79177	1.33857	0.887886	1.20918
sp|Q9NZC7|WWOX_HUMAN	WWOX_HUMAN	WWOX	4.35716	2.08738	0.886974	1.91888
sp|Q16543|CDC37_HUMAN	CDC37_HUMAN	CDC37	22.7292	4.76752	0.879906	1.64512
sp|P30050|RL12_HUMAN	RL12_HUMAN	RPL12	4.08605	2.0214	0.876064	1.12823
sp|P62861|RS30_HUMAN	RS30_HUMAN	FAU	3.45857	1.85972	0.874223	1.04578
sp|P42356|PI4KA_HUMAN	PI4KA_HUMAN	PI4KA	0	0	0.868363	-1.20232
sp|Q9UHR5|S30BP_HUMAN	S30BP_HUMAN	SAP30BP	5.47854	2.34063	0.863551	1.3833
sp|Q13596|SNX1_HUMAN	SNX1_HUMAN	SNX1	5.51895	2.34925	0.860478	2.35367
sp|Q05655|KPCD_HUMAN	KPCD_HUMAN	PRKCD	13.0402	3.61113	0.86034	1.44224
sp|P39023|RL3_HUMAN	RL3_HUMAN	RPL3	20.0158	4.47391	0.858874	1.95468
sp|Q15388|TOM20_HUMAN	TOM20_HUMAN	TOMM20	0	0	0.852075	2.18653
sp|Q9UH62|ARMX3_HUMAN	ARMX3_HUMAN	ARMCX3	4.34118	2.08355	0.85104	2.47503
sp|P61247|RS3A_HUMAN	RS3A_HUMAN	RPS3A	2.19105	1.48022	0.850717	-2.29348
sp|O14641|DVL2_HUMAN	DVL2_HUMAN	DVL2	4.13354	2.03311	0.849114	1.56184
sp|O95486|SC24A_HUMAN	SC24A_HUMAN	SEC24A	0	0	0.84798	-1.06288
sp|P23396|RS3_HUMAN	RS3_HUMAN	RPS3	2.93339	1.71272	0.846215	-1.88469
sp|Q86YS7|C2CD5_HUMAN	C2CD5_HUMAN	C2CD5	0.629048	0.793125	0.844988	-1.92878
sp|Q9Y217|MTMR6_HUMAN	MTMR6_HUMAN	MTMR6	12.8025	3.57805	0.842806	1.09842
sp|Q9BWH2|FUND2_HUMAN	FUND2_HUMAN	FUNDC2	2.58813	1.60877	0.842667	1.3345
sp|Q9NVP1|DDX18_HUMAN	DDX18_HUMAN	DDX18	0	0	0.840806	-2.45753
sp|Q96RL7|VP13A_HUMAN	VP13A_HUMAN	VPS13A	5.63985	2.37484	0.837546	-2.69067
sp|Q13325|IFIT5_HUMAN	IFIT5_HUMAN	IFIT5	5.69903	2.38726	0.828505	1.38542
sp|O14531|DPYL4_HUMAN	DPYL4_HUMAN	DPYSL4	0	0	0.825639	1.30467
sp|Q9P2E9|RRBP1_HUMAN	RRBP1_HUMAN	RRBP1	0.784928	0.885961	0.825504	-3.22784
sp|P22234|PUR6_HUMAN	PUR6_HUMAN	PAICS	3.71346	1.92703	0.817527	1.21853
sp|Q15056|IF4H_HUMAN	IF4H_HUMAN	EIF4H	4.46119	2.11215	0.814667	1.92777
sp|Q9UBC2|EP15R_HUMAN	EP15R_HUMAN	EPS15L1	5.15338	2.27011	0.812639	1.90044
sp|P08195|4F2_HUMAN	4F2_HUMAN	SLC3A2	4.65279	2.15703	0.811462	-1.01265
sp|Q6P3W7|SCYL2_HUMAN	SCYL2_HUMAN	SCYL2	4.76683	2.18331	0.809941	2.31356
sp|Q9H3N1|TMX1_HUMAN	TMX1_HUMAN	TMX1	0	0	0.809472	-2.41113
sp|Q59GN2|R39L5_HUMAN;sp|P62891|RL39_HUMAN	R39L5_HUMAN	RPL39P5	640.319	25.3045	0.809367	1.7105
sp|Q7Z2W4|ZCCHV_HUMAN	ZCCHV_HUMAN	ZC3HAV1	9.61903	3.10146	0.80297	1.80022
sp|Q96EA4|SPDLY_HUMAN	SPDLY_HUMAN	SPDL1	3.46968	1.86271	0.802223	1.29741
sp|O00410|IPO5_HUMAN	IPO5_HUMAN	IPO5	5.73016	2.39378	0.801551	1.48351
sp|Q9NZ01|TECR_HUMAN	TECR_HUMAN	TECR	0.792006	0.889947	0.797817	-2.38654
sp|O14795|UN13B_HUMAN	UN13B_HUMAN	UNC13B	2.51211	1.58496	0.796672	1.33138
sp|Q9Y3E5|PTH2_HUMAN	PTH2_HUMAN	PTRH2	0	0	0.794411	0.907123
sp|P46778|RL21_HUMAN	RL21_HUMAN	RPL21	0.761518	0.87265	0.793997	-1.79402
sp|Q9UHQ9|NB5R1_HUMAN	NB5R1_HUMAN	CYB5R1	3.48063	1.86565	0.792322	1.93009
sp|Q8TEQ6|GEMI5_HUMAN	GEMI5_HUMAN	GEMIN5	1.51486	1.2308	0.789111	-2.42736
sp|P22314|UBA1_HUMAN	UBA1_HUMAN	UBA1	2.37203	1.54014	0.786769	1.23081
sp|Q7Z6K5|ARPIN_HUMAN	ARPIN_HUMAN	ARPIN	3.27213	1.8089	0.784593	1.92466
sp|P27348|1433T_HUMAN	1433T_HUMAN	YWHAQ	0	0	0.776494	0.920941
sp|Q9HDC5|JPH1_HUMAN	JPH1_HUMAN	JPH1	3.05721	1.74849	0.774739	-1.3675
sp|Q3YEC7|RABL6_HUMAN	RABL6_HUMAN	RABL6	0.50637	0.711597	0.773896	-1.94682
sp|O14966|RAB7L_HUMAN	RAB7L_HUMAN	RAB29	3.26586	1.80717	0.772358	1.57613
sp|Q15398|DLGP5_HUMAN	DLGP5_HUMAN	DLGAP5	0	0	0.770611	1.40724
sp|Q5SY16|NOL9_HUMAN	NOL9_HUMAN	NOL9	4.01492	2.00373	0.768601	1.03409
sp|O75369|FLNB_HUMAN	FLNB_HUMAN	FLNB	1.91965	1.38551	0.767786	-1.88024
sp|Q8NDI1|EHBP1_HUMAN	EHBP1_HUMAN	EHBP1	6.72125	2.59254	0.764905	1.34478
sp|Q86Y07|VRK2_HUMAN	VRK2_HUMAN	VRK2	3.03915	1.74332	0.76462	0.94334
sp|Q13439|GOGA4_HUMAN	GOGA4_HUMAN	GOLGA4	12.8519	3.58496	0.763231	2.91514
sp|Q96P47|AGAP3_HUMAN	AGAP3_HUMAN	AGAP3	2.11938	1.45581	0.759671	-1.75378
sp|Q7Z569|BRAP_HUMAN	BRAP_HUMAN	BRAP	20.1655	4.4906	0.756783	1.45146
sp|P51957|NEK4_HUMAN	NEK4_HUMAN	NEK4	0	0	0.756098	0.812755
sp|Q5THJ4|VP13D_HUMAN	VP13D_HUMAN	VPS13D	10.4385	3.23086	0.75357	2.90671
sp|P62847|RS24_HUMAN	RS24_HUMAN	RPS24	3.22081	1.79466	0.753359	0.942319
sp|P13797|PLST_HUMAN	PLST_HUMAN	PLS3	14.5811	3.81852	0.751991	1.47642
sp|Q9UGP4|LIMD1_HUMAN	LIMD1_HUMAN	LIMD1	10.1102	3.17965	0.751554	1.15768
sp|P49792|RBP2_HUMAN	RBP2_HUMAN	RANBP2	1.86545	1.36582	0.73562	-2.7328
sp|Q8WXH0|SYNE2_HUMAN	SYNE2_HUMAN	SYNE2	4.48208	2.11709	0.735209	-3.15914
sp|P12956|XRCC6_HUMAN	XRCC6_HUMAN	XRCC6	5.78089	2.40435	0.734679	0.874742
sp|P15531|NDKA_HUMAN	NDKA_HUMAN	NME1	1.23675	1.11209	0.733107	1.31133
sp|P62701|RS4X_HUMAN	RS4X_HUMAN	RPS4X	3.18759	1.78538	0.731615	-0.950146
sp|Q14677|EPN4_HUMAN	EPN4_HUMAN	CLINT1	4.51269	2.12431	0.72927	1.94527
sp|P62081|RS7_HUMAN	RS7_HUMAN	RPS7	3.36166	1.83348	0.725919	1.00549
sp|Q16643|DREB_HUMAN	DREB_HUMAN	DBN1	8.35316	2.89018	0.723273	0.771539
sp|Q8N3C0|ASCC3_HUMAN	ASCC3_HUMAN	ASCC3	0	0	0.722427	-1.93672
sp|Q86UP2|KTN1_HUMAN	KTN1_HUMAN	KTN1	5.66773	2.3807	0.720943	-1.15061
sp|P49757|NUMB_HUMAN	NUMB_HUMAN	NUMB	2.59636	1.61132	0.719872	-1.86335
sp|Q8WVS4|WDR60_HUMAN	WDR60_HUMAN	WDR60	1.55502	1.247	0.717219	-1.96595
sp|P35611|ADDA_HUMAN	ADDA_HUMAN	ADD1	0	0	0.716238	-1.72943
sp|O43169|CYB5B_HUMAN	CYB5B_HUMAN	CYB5B	1.00341	1.00171	0.715797	-2.04784
sp|O15498|YKT6_HUMAN	YKT6_HUMAN	YKT6	4.03854	2.00961	0.711423	0.738111
sp|Q8N6R0|MET13_HUMAN	MET13_HUMAN	METTL13	0	0	0.705296	-1.16103
sp|Q9Y6B6|SAR1B_HUMAN	SAR1B_HUMAN	SAR1B	1.52671	1.2356	0.705117	1.16258
sp|Q99442|SEC62_HUMAN	SEC62_HUMAN	SEC62	4.48703	2.11826	0.702138	-2.28669
sp|P61353|RL27_HUMAN	RL27_HUMAN	RPL27	3.54067	1.88167	0.70135	1.57656
sp|Q08379|GOGA2_HUMAN	GOGA2_HUMAN	GOLGA2	0.89588	0.94651	0.700024	-1.55282
sp|P11387|TOP1_HUMAN	TOP1_HUMAN	TOP1	3.90604	1.97637	0.698543	1.84104
sp|P13667|PDIA4_HUMAN	PDIA4_HUMAN	PDIA4	5.84726	2.41811	0.697088	1.07489
sp|O94906|PRP6_HUMAN	PRP6_HUMAN	PRPF6	0.737854	0.858984	0.69197	-2.12507
sp|Q6PKG0|LARP1_HUMAN	LARP1_HUMAN	LARP1	4.81503	2.19432	0.686635	2.2764
sp|Q8N9N7|LRC57_HUMAN	LRC57_HUMAN	LRRC57	9.55767	3.09155	0.679708	1.29571
sp|Q92616|GCN1_HUMAN	GCN1_HUMAN	GCN1	2.51234	1.58503	0.6783	-1.88573
sp|Q14126|DSG2_HUMAN	DSG2_HUMAN	DSG2	0	0	0.678279	-1.61724
sp|Q8N0Z3|SPICE_HUMAN	SPICE_HUMAN	SPICE1	0.656611	0.810315	0.672577	-1.92303
sp|Q14318|FKBP8_HUMAN	FKBP8_HUMAN	FKBP8	4.11614	2.02883	0.670994	1.2145
sp|P36578|RL4_HUMAN	RL4_HUMAN	RPL4	12.5251	3.53908	0.666323	1.59554
sp|P52789|HXK2_HUMAN	HXK2_HUMAN	HK2	8.59598	2.93189	0.665524	2.20641
sp|P16615|AT2A2_HUMAN	AT2A2_HUMAN	ATP2A2	3.87831	1.96934	0.658641	-2.08051
sp|Q96MW1|CCD43_HUMAN	CCD43_HUMAN	CCDC43	5.73884	2.39559	0.658601	1.67681
sp|P08240|SRPRA_HUMAN	SRPRA_HUMAN	SRPRA	1.34406	1.15934	0.657313	-1.91059
sp|P46781|RS9_HUMAN	RS9_HUMAN	RPS9	2.05913	1.43497	0.650685	-1.71798
sp|Q8NBF6|AVL9_HUMAN	AVL9_HUMAN	AVL9	2.23987	1.49662	0.648201	0.734713
sp|P51617|IRAK1_HUMAN	IRAK1_HUMAN	IRAK1	1.86371	1.36518	0.638441	1.5288
sp|P51149|RAB7A_HUMAN	RAB7A_HUMAN	RAB7A	16.3095	4.0385	0.638363	2.07041
sp|Q5SVZ6|ZMYM1_HUMAN	ZMYM1_HUMAN	ZMYM1	2.94713	1.71672	0.637145	-1.97275
sp|O43396|TXNL1_HUMAN	TXNL1_HUMAN	TXNL1	0.657389	0.810795	0.635332	-1.67827
sp|P46939|UTRO_HUMAN	UTRO_HUMAN	UTRN	9.51109	3.08401	0.63468	2.61142
sp|Q9UL25|RAB21_HUMAN	RAB21_HUMAN	RAB21	3.1945	1.78732	0.631984	1.07766
sp|P13639|EF2_HUMAN	EF2_HUMAN	EEF2	4.48714	2.11829	0.631852	0.984182
sp|O95219|SNX4_HUMAN	SNX4_HUMAN	SNX4	2.26319	1.50439	0.629585	0.620857
sp|Q9UL54|TAOK2_HUMAN	TAOK2_HUMAN	TAOK2	0.794123	0.891136	0.626849	-1.76887
sp|O96011|PX11B_HUMAN	PX11B_HUMAN	PEX11B	3.44243	1.85538	0.626708	1.42747
sp|Q96EY4|TMA16_HUMAN	TMA16_HUMAN	TMA16	0.741552	0.861134	0.625596	-1.90077
sp|Q9H444|CHM4B_HUMAN	CHM4B_HUMAN	CHMP4B	0	0	0.623838	1.19349
sp|Q14247|SRC8_HUMAN	SRC8_HUMAN	CTTN	5.48285	2.34155	0.622987	1.45574
sp|P07737|PROF1_HUMAN	PROF1_HUMAN	PFN1	0.94208	0.970608	0.622718	1.58376
sp|Q96C19|EFHD2_HUMAN	EFHD2_HUMAN	EFHD2	3.36521	1.83445	0.621879	1.60876
sp|Q9UNX3|RL26L_HUMAN	RL26L_HUMAN	RPL26L1	8.51289	2.91768	0.620161	1.85108
sp|Q9Y2I1|NISCH_HUMAN	NISCH_HUMAN	NISCH	0	0	0.618772	-1.59957
sp|P20020|AT2B1_HUMAN	AT2B1_HUMAN	ATP2B1	0	0	0.617958	-1.7798
sp|Q99733|NP1L4_HUMAN	NP1L4_HUMAN	NAP1L4	1.48498	1.2186	0.613983	1.32188
sp|Q8IUD2|RB6I2_HUMAN	RB6I2_HUMAN	ERC1	6.57749	2.56466	0.61289	2.07707
sp|Q9BZF3|OSBL6_HUMAN	OSBL6_HUMAN	OSBPL6	2.01945	1.42107	0.612732	-1.71384
sp|Q06124|PTN11_HUMAN	PTN11_HUMAN	PTPN11	0	0	0.61135	0.845249
sp|O00213|APBB1_HUMAN	APBB1_HUMAN	APBB1	3.43175	1.8525	0.610568	1.65248
sp|Q9BR76|COR1B_HUMAN	COR1B_HUMAN	CORO1B	4.16826	2.04163	0.610329	1.31454
sp|P46821|MAP1B_HUMAN	MAP1B_HUMAN	MAP1B	1.24767	1.11699	0.607585	-2.26629
sp|Q92667|AKAP1_HUMAN	AKAP1_HUMAN	AKAP1	12.0819	3.4759	0.607003	0.790806
sp|Q9BXK5|B2L13_HUMAN	B2L13_HUMAN	BCL2L13	5.3636	2.31595	0.600397	1.02487
sp|P24752|THIL_HUMAN	THIL_HUMAN	ACAT1	7.42209	2.72435	0.599736	1.51044
sp|P62854|RS26_HUMAN;sp|Q5JNZ5|RS26L_HUMAN	RS26_HUMAN	RPS26	2.51529	1.58597	0.597683	0.630154
sp|O95210|STBD1_HUMAN	STBD1_HUMAN	STBD1	11.6933	3.41954	0.591169	1.21999
sp|Q15058|KIF14_HUMAN	KIF14_HUMAN	KIF14	0	0	0.588466	-2.21681
sp|P56192|SYMC_HUMAN	SYMC_HUMAN	MARS	0	0	0.587244	-1.17653
sp|Q9NPL8|TIDC1_HUMAN	TIDC1_HUMAN	TIMMDC1	0	0	0.585763	0.870306
sp|O94826|TOM70_HUMAN	TOM70_HUMAN	TOMM70	4.1123	2.02788	0.585191	1.13904
sp|Q9NU22|MDN1_HUMAN	MDN1_HUMAN	MDN1	1.37889	1.17426	0.577325	-2.06186
sp|Q9H6T3|RPAP3_HUMAN	RPAP3_HUMAN	RPAP3	0	0	0.57564	-1.53563
sp|O95831|AIFM1_HUMAN	AIFM1_HUMAN	AIFM1	16.2419	4.03013	0.575628	1.20736
sp|Q9ULE6|PALD_HUMAN	PALD_HUMAN	PALD1	5.62749	2.37223	0.571988	1.77931
sp|P56182|RRP1_HUMAN	RRP1_HUMAN	RRP1	0.882011	0.939154	0.57027	-1.40745
sp|P37802|TAGL2_HUMAN	TAGL2_HUMAN	TAGLN2	4.13601	2.03372	0.568091	1.08916
sp|P11586|C1TC_HUMAN	C1TC_HUMAN	MTHFD1	2.03409	1.42622	0.567679	-1.72641
sp|Q5JTH9|RRP12_HUMAN	RRP12_HUMAN	RRP12	7.08167	2.66114	0.567407	-0.66386
sp|P31948|STIP1_HUMAN	STIP1_HUMAN	STIP1	2.56737	1.6023	0.567275	-2.06033
sp|Q02878|RL6_HUMAN	RL6_HUMAN	RPL6	7.20142	2.68355	0.566786	1.45882
sp|Q96AG4|LRC59_HUMAN	LRC59_HUMAN	LRRC59	1.78333	1.33542	0.564875	-1.01919
sp|Q14315|FLNC_HUMAN	FLNC_HUMAN	FLNC	0	0	0.561808	-1.73983
sp|O75976|CBPD_HUMAN	CBPD_HUMAN	CPD	3.10062	1.76086	0.556271	1.72727
sp|P83881|RL36A_HUMAN	RL36A_HUMAN	RPL36A	7.83253	2.79867	0.551428	0.582831
sp|P62266|RS23_HUMAN	RS23_HUMAN	RPS23	3.99118	1.99779	0.548256	0.670817
sp|Q2M1P5|KIF7_HUMAN	KIF7_HUMAN	KIF7	3.08922	1.75762	0.547904	1.07342
sp|P39019|RS19_HUMAN	RS19_HUMAN	RPS19	3.5256	1.87766	0.546827	1.08294
sp|P54136|SYRC_HUMAN	SYRC_HUMAN	RARS	2.3041	1.51793	0.54259	0.881948
sp|P50416|CPT1A_HUMAN	CPT1A_HUMAN	CPT1A	4.68879	2.16536	0.542273	1.42118
sp|O00400|ACATN_HUMAN	ACATN_HUMAN	SLC33A1	4.31075	2.07623	0.541594	-1.36684
sp|Q13427|PPIG_HUMAN	PPIG_HUMAN	PPIG	1.57957	1.25681	0.541065	-1.46837
sp|P08238|HS90B_HUMAN	HS90B_HUMAN	HSP90AB1	5.17577	2.27503	0.540458	-0.783948
sp|O00750|P3C2B_HUMAN	P3C2B_HUMAN	PIK3C2B	3.80316	1.95017	0.540451	1.1393
sp|Q14139|UBE4A_HUMAN	UBE4A_HUMAN	UBE4A	0	0	0.540414	-1.20176
sp|O95721|SNP29_HUMAN	SNP29_HUMAN	SNAP29	4.44887	2.10924	0.540348	1.2026
sp|Q07960|RHG01_HUMAN	RHG01_HUMAN	ARHGAP1	10.4371	3.23064	0.538657	2.12321
sp|Q9H7Z3|NRDE2_HUMAN	NRDE2_HUMAN	NRDE2	0	0	0.536739	-1.4708
sp|P60468|SC61B_HUMAN	SC61B_HUMAN	SEC61B	0	0	0.534504	-1.39353
sp|O75410|TACC1_HUMAN	TACC1_HUMAN	TACC1	4.62576	2.15076	0.53148	1.8551
sp|Q96S66|CLCC1_HUMAN	CLCC1_HUMAN	CLCC1	1.98991	1.41064	0.530865	-1.75343
sp|Q15643|TRIPB_HUMAN	TRIPB_HUMAN	TRIP11	8.99393	2.99899	0.530504	2.01594
sp|Q7Z434|MAVS_HUMAN	MAVS_HUMAN	MAVS	6.78043	2.60393	0.530151	0.694421
sp|P61927|RL37_HUMAN	RL37_HUMAN	RPL37	6.45933	2.54152	0.527472	1.27042
sp|P46779|RL28_HUMAN	RL28_HUMAN	RPL28	3.17438	1.78168	0.526427	-0.715436
sp|P18583|SON_HUMAN	SON_HUMAN	SON	4.26868	2.06608	0.525631	-0.856993
sp|P00167|CYB5_HUMAN	CYB5_HUMAN	CYB5A	0	0	0.525185	0.804334
sp|P53396|ACLY_HUMAN	ACLY_HUMAN	ACLY	3.4994	1.87067	0.523882	0.739575
sp|P49959|MRE11_HUMAN	MRE11_HUMAN	MRE11	5.34962	2.31292	0.522855	1.07462
sp|Q9H9A6|LRC40_HUMAN	LRC40_HUMAN	LRRC40	4.7128	2.1709	0.519869	0.638982
sp|Q99878|H2A1J_HUMAN;sp|Q96KK5|H2A1H_HUMAN;sp|Q9BTM1|H2AJ_HUMAN;sp|Q16777|H2A2C_HUMAN;sp|Q93077|H2A1C_HUMAN;sp|Q7L7L0|H2A3_HUMAN;sp|Q6FI13|H2A2A_HUMAN;sp|P20671|H2A1D_HUMAN;sp|P0C0S8|H2A1_HUMAN;sp|P04908|H2A1B_HUMAN;sp|Q71UI9|H2AV_HUMAN;sp|P0C0S5|H2AZ_HUMAN;sp|Q96QV6|H2A1A_HUMAN;sp|P16104|H2AX_HUMAN	H2A1J_HUMAN	HIST1H2AJ	0	0	0.515363	1.25525
sp|P07305|H10_HUMAN	H10_HUMAN	H1F0	3.42433	1.85049	0.514859	1.65355
sp|Q9H3P7|GCP60_HUMAN	GCP60_HUMAN	ACBD3	3.73389	1.93233	0.514744	1.57544
sp|P61254|RL26_HUMAN	RL26_HUMAN	RPL26	6.5665	2.56252	0.509457	0.617584
sp|Q8IZJ1|UNC5B_HUMAN	UNC5B_HUMAN	UNC5B	6.38357	2.52657	0.508041	1.48539
sp|Q9UPN3|MACF1_HUMAN	MACF1_HUMAN	MACF1	1.92564	1.38768	0.502811	-1.9533
sp|Q07020|RL18_HUMAN	RL18_HUMAN	RPL18	5.32972	2.30862	0.500522	1.38519
sp|Q96BY7|ATG2B_HUMAN	ATG2B_HUMAN	ATG2B	5.96209	2.44174	0.500247	-1.83085
sp|Q09666|AHNK_HUMAN	AHNK_HUMAN	AHNAK	5.29063	2.30014	0.497161	-1.48777
sp|P49790|NU153_HUMAN	NU153_HUMAN	NUP153	0.817578	0.9042	0.495795	-1.92714
sp|Q6P996|PDXD1_HUMAN	PDXD1_HUMAN	PDXDC1	0.825879	0.908779	0.49305	-1.2663
sp|P62937|PPIA_HUMAN	PPIA_HUMAN	PPIA	5.7613	2.40027	0.489255	1.15847
sp|P35030|TRY3_HUMAN	TRY3_HUMAN	PRSS3	0	0	0.489224	-1.48891
sp|P82094|TMF1_HUMAN	TMF1_HUMAN	TMF1	3.13212	1.76978	0.487229	1.36143
sp|Q5H9R7|PP6R3_HUMAN	PP6R3_HUMAN	PPP6R3	0	0	0.486887	0.849913
sp|Q07812|BAX_HUMAN	BAX_HUMAN	BAX	3.72855	1.93095	0.48624	1.41346
sp|Q8NC51|PAIRB_HUMAN	PAIRB_HUMAN	SERBP1	4.01141	2.00285	0.486107	1.42945
sp|P62826|RAN_HUMAN	RAN_HUMAN	RAN	7.40323	2.72089	0.485918	1.23915
sp|Q14674|ESPL1_HUMAN	ESPL1_HUMAN	ESPL1	0	0	0.484956	1.06203
sp|O75592|MYCB2_HUMAN	MYCB2_HUMAN	MYCBP2	1.11231	1.05466	0.48342	-1.64973
sp|P55010|IF5_HUMAN	IF5_HUMAN	EIF5	3.83946	1.95945	0.481394	1.28356
sp|Q96HC4|PDLI5_HUMAN	PDLI5_HUMAN	PDLIM5	4.4325	2.10535	0.481364	1.31753
sp|Q15361|TTF1_HUMAN	TTF1_HUMAN	TTF1	2.83628	1.68413	0.47954	-1.65389
sp|Q8N0X7|SPG20_HUMAN	SPG20_HUMAN	SPART	3.40656	1.84569	0.479509	1.24402
sp|Q5HYI7|MTX3_HUMAN	MTX3_HUMAN	MTX3	4.60641	2.14626	0.478765	1.32038
sp|P15880|RS2_HUMAN	RS2_HUMAN	RPS2	2.26753	1.50583	0.478087	-0.874522
sp|Q9NRY5|F1142_HUMAN	F1142_HUMAN	FAM114A2	8.88255	2.98036	0.476079	1.29399
sp|Q15678|PTN14_HUMAN	PTN14_HUMAN	PTPN14	0	0	0.474046	0.557813
sp|Q14683|SMC1A_HUMAN	SMC1A_HUMAN	SMC1A	0	0	0.473426	-1.44691
sp|P43307|SSRA_HUMAN	SSRA_HUMAN	SSR1	0	0	0.473238	-1.59014
sp|O60566|BUB1B_HUMAN	BUB1B_HUMAN	BUB1B	1.20978	1.0999	0.467628	-1.39307
sp|Q9UQ35|SRRM2_HUMAN	SRRM2_HUMAN	SRRM2	4.10843	2.02693	0.46528	-1.89695
sp|O60610|DIAP1_HUMAN	DIAP1_HUMAN	DIAPH1	0	0	0.463199	-0.69994
sp|Q15366|PCBP2_HUMAN	PCBP2_HUMAN	PCBP2	2.85733	1.69036	0.45799	0.794944
sp|P18564|ITB6_HUMAN	ITB6_HUMAN	ITGB6	0	0	0.456794	1.19044
sp|Q6P2Q9|PRP8_HUMAN	PRP8_HUMAN	PRPF8	2.81659	1.67827	0.455214	-1.20745
sp|Q4KMP7|TB10B_HUMAN	TB10B_HUMAN	TBC1D10B	0	0	0.453299	-1.20365
sp|Q9NRA8|4ET_HUMAN	4ET_HUMAN	EIF4ENIF1	5.23654	2.28835	0.453162	1.34283
sp|Q15365|PCBP1_HUMAN	PCBP1_HUMAN	PCBP1	3.12015	1.7664	0.447756	0.622295
sp|P14625|ENPL_HUMAN	ENPL_HUMAN	HSP90B1	18.2126	4.26763	0.447117	1.20373
sp|P62269|RS18_HUMAN	RS18_HUMAN	RPS18	2.12892	1.45908	0.443005	-1.04801
sp|Q53H12|AGK_HUMAN	AGK_HUMAN	AGK	7.29446	2.70083	0.440917	1.23593
sp|P62899|RL31_HUMAN	RL31_HUMAN	RPL31	3.1945	1.78732	0.44032	0.851954
sp|Q8TEU7|RPGF6_HUMAN	RPGF6_HUMAN	RAPGEF6	1.16059	1.07731	0.440036	-1.50303
sp|P63244|RACK1_HUMAN	RACK1_HUMAN	RACK1	1.08483	1.04155	0.43791	-1.40242
sp|Q07021|C1QBP_HUMAN	C1QBP_HUMAN	C1QBP	0	0	0.437763	0.839503
sp|Q02790|FKBP4_HUMAN	FKBP4_HUMAN	FKBP4	11.7696	3.43069	0.437339	1.15806
sp|P17812|PYRG1_HUMAN	PYRG1_HUMAN	CTPS1	6.06318	2.46235	0.436484	1.32952
sp|Q9UKK9|NUDT5_HUMAN	NUDT5_HUMAN	NUDT5	0	0	0.4339	0.669359
sp|O43175|SERA_HUMAN	SERA_HUMAN	PHGDH	4.09378	2.02331	0.433861	1.06889
sp|O75431|MTX2_HUMAN	MTX2_HUMAN	MTX2	4.69853	2.16761	0.430005	0.89281
sp|Q96N67|DOCK7_HUMAN	DOCK7_HUMAN	DOCK7	1.71739	1.31049	0.428512	-2.09567
sp|P04406|G3P_HUMAN	G3P_HUMAN	GAPDH	5.87306	2.42344	0.425484	1.18952
sp|Q05682|CALD1_HUMAN	CALD1_HUMAN	CALD1	4.28356	2.06968	0.422169	1.18357
sp|Q9UKF6|CPSF3_HUMAN	CPSF3_HUMAN	CPSF3	1.61134	1.26939	0.422014	1.16626
sp|Q9BSD7|NTPCR_HUMAN	NTPCR_HUMAN	NTPCR	0	0	0.418589	-0.815994
sp|P62241|RS8_HUMAN	RS8_HUMAN	RPS8	3.04023	1.74363	0.416704	-0.434308
sp|Q9BQG0|MBB1A_HUMAN	MBB1A_HUMAN	MYBBP1A	6.8381	2.61498	0.41535	-0.5394
sp|Q8NE71|ABCF1_HUMAN	ABCF1_HUMAN	ABCF1	3.2143	1.79285	0.4133	-0.900875
sp|Q8IWB9|TEX2_HUMAN	TEX2_HUMAN	TEX2	0	0	0.412123	-0.799647
sp|O60488|ACSL4_HUMAN	ACSL4_HUMAN	ACSL4	35.3909	5.94903	0.410611	0.732727
sp|Q13283|G3BP1_HUMAN	G3BP1_HUMAN	G3BP1	0	0	0.410581	0.652379
sp|Q15738|NSDHL_HUMAN	NSDHL_HUMAN	NSDHL	3.03259	1.74143	0.408616	-1.13034
sp|Q969Q0|RL36L_HUMAN	RL36L_HUMAN	RPL36AL	7.11203	2.66684	0.408018	1.25979
sp|Q14C86|GAPD1_HUMAN	GAPD1_HUMAN	GAPVD1	11.5009	3.3913	0.407946	1.68378
sp|O14980|XPO1_HUMAN	XPO1_HUMAN	XPO1	4.79114	2.18887	0.406385	0.92061
sp|Q99614|TTC1_HUMAN	TTC1_HUMAN	TTC1	9.71566	3.117	0.405346	-1.03691
sp|Q9Y5X1|SNX9_HUMAN	SNX9_HUMAN	SNX9	0	0	0.405099	-1.17067
sp|P10412|H14_HUMAN	H14_HUMAN	HIST1H1E	17.4838	4.18136	0.404185	0.74693
sp|P09543|CN37_HUMAN	CN37_HUMAN	CNP	1.84964	1.36001	0.402495	-0.834242
sp|Q9H7C9|AAMDC_HUMAN	AAMDC_HUMAN	AAMDC	1.85505	1.362	0.400997	0.963774
sp|Q9NR12|PDLI7_HUMAN	PDLI7_HUMAN	PDLIM7	31.0035	5.56808	0.399246	0.602195
sp|Q5JTW2|CEP78_HUMAN	CEP78_HUMAN	CEP78	1.22882	1.10852	0.397734	-1.33665
sp|P45880|VDAC2_HUMAN	VDAC2_HUMAN	VDAC2	5.69002	2.38538	0.39751	1.40568
sp|P55036|PSMD4_HUMAN	PSMD4_HUMAN	PSMD4	1.19668	1.09393	0.395822	-1.46063
sp|Q969Z3|MARC2_HUMAN	MARC2_HUMAN	MARC2	4.60034	2.14484	0.393817	0.949166
sp|Q6XZF7|DNMBP_HUMAN	DNMBP_HUMAN	DNMBP	2.37868	1.5423	0.389143	0.549108
sp|P35659|DEK_HUMAN	DEK_HUMAN	DEK	2.86514	1.69267	0.386518	0.707261
sp|Q9NZI8|IF2B1_HUMAN	IF2B1_HUMAN	IGF2BP1	2.74347	1.65634	0.385183	-0.805299
sp|Q71UM5|RS27L_HUMAN	RS27L_HUMAN	RPS27L	0	0	0.383632	-1.4731
sp|Q99623|PHB2_HUMAN	PHB2_HUMAN	PHB2	3.53555	1.88031	0.383551	1.30621
sp|P18621|RL17_HUMAN	RL17_HUMAN	RPL17	3.60258	1.89805	0.380617	-0.334525
sp|P46776|RL27A_HUMAN	RL27A_HUMAN	RPL27A	2.96073	1.72068	0.379636	-0.46477
sp|Q04637|IF4G1_HUMAN	IF4G1_HUMAN	EIF4G1	4.4013	2.09793	0.377814	-1.44965
sp|P19367|HXK1_HUMAN	HXK1_HUMAN	HK1	10.6141	3.25793	0.377798	1.02402
sp|P32119|PRDX2_HUMAN	PRDX2_HUMAN	PRDX2	4.15241	2.03775	0.377416	-0.587268
sp|O75534|CSDE1_HUMAN	CSDE1_HUMAN	CSDE1	4.30807	2.07559	0.376442	1.38167
sp|Q5C9Z4|NOM1_HUMAN	NOM1_HUMAN	NOM1	3.35594	1.83192	0.376428	-0.857027
sp|O94813|SLIT2_HUMAN	SLIT2_HUMAN	SLIT2	1.22094	1.10496	0.376259	-1.18341
sp|E9PRG8|CK098_HUMAN	CK098_HUMAN	C11orf98	1.32791	1.15235	0.374848	0.833315
sp|P25705|ATPA_HUMAN	ATPA_HUMAN	ATP5F1A	4.65742	2.15811	0.372426	1.09673
sp|Q92625|ANS1A_HUMAN	ANS1A_HUMAN	ANKS1A	4.06137	2.01528	0.37096	0.90006
sp|O60645|EXOC3_HUMAN	EXOC3_HUMAN	EXOC3	1.65173	1.2852	0.370888	0.677339
sp|Q9Y6Y8|S23IP_HUMAN	S23IP_HUMAN	SEC23IP	1.15609	1.07522	0.369651	-0.980028
sp|P83731|RL24_HUMAN	RL24_HUMAN	RPL24	4.37641	2.09199	0.365963	0.414611
sp|Q96JB2|COG3_HUMAN	COG3_HUMAN	COG3	0	0	0.364871	1.25352
sp|Q86UK7|ZN598_HUMAN	ZN598_HUMAN	ZNF598	0	0	0.364765	-0.938281
sp|O95372|LYPA2_HUMAN	LYPA2_HUMAN	LYPLA2	2.72512	1.65079	0.364313	1.09439
sp|Q9HD67|MYO10_HUMAN	MYO10_HUMAN	MYO10	1.48222	1.21747	0.363373	-1.0346
sp|Q9Y6I9|TX264_HUMAN	TX264_HUMAN	TEX264	8.39807	2.89794	0.362175	0.926239
sp|Q9HCL2|GPAT1_HUMAN	GPAT1_HUMAN	GPAM	7.28661	2.69937	0.362096	1.04102
sp|Q9NX40|OCAD1_HUMAN	OCAD1_HUMAN	OCIAD1	4.0753	2.01874	0.360362	0.785792
sp|Q9Y4E8|UBP15_HUMAN	UBP15_HUMAN	USP15	4.46647	2.1134	0.359864	1.41498
sp|Q13464|ROCK1_HUMAN	ROCK1_HUMAN	ROCK1	2.18974	1.47978	0.3596	1.02866
sp|Q9BU76|MMTA2_HUMAN	MMTA2_HUMAN	MMTAG2	2.97846	1.72582	0.357088	-0.435516
sp|Q96AY4|TTC28_HUMAN	TTC28_HUMAN	TTC28	5.49261	2.34363	0.356139	1.57674
sp|Q8TD19|NEK9_HUMAN	NEK9_HUMAN	NEK9	0	0	0.35576	-0.903693
sp|P53621|COPA_HUMAN	COPA_HUMAN	COPA	1.24424	1.11546	0.355094	-0.705914
sp|P51648|AL3A2_HUMAN	AL3A2_HUMAN	ALDH3A2	4.18896	2.04669	0.354411	0.331425
sp|Q92522|H1X_HUMAN	H1X_HUMAN	H1FX	3.6029	1.89813	0.35292	1.15501
sp|P11142|HSP7C_HUMAN	HSP7C_HUMAN	HSPA8	4.17008	2.04208	0.352596	-0.974296
sp|Q8IWC1|MA7D3_HUMAN	MA7D3_HUMAN	MAP7D3	0.641642	0.801025	0.351339	-1.09248
sp|O00151|PDLI1_HUMAN	PDLI1_HUMAN	PDLIM1	3.73445	1.93247	0.346837	0.883508
sp|Q02040|AK17A_HUMAN	AK17A_HUMAN	AKAP17A	2.47059	1.57181	0.34572	-1.23525
sp|Q5VT06|CE350_HUMAN	CE350_HUMAN	CEP350	0	0	0.3444	-0.985829
sp|Q9Y3P9|RBGP1_HUMAN	RBGP1_HUMAN	RABGAP1	1.11019	1.05366	0.342528	-0.874257
sp|O15173|PGRC2_HUMAN	PGRC2_HUMAN	PGRMC2	2.73743	1.65452	0.342029	-0.460398
sp|P30041|PRDX6_HUMAN	PRDX6_HUMAN	PRDX6	4.02647	2.00661	0.340286	0.539181
sp|P78344|IF4G2_HUMAN	IF4G2_HUMAN	EIF4G2	4.13477	2.03341	0.340228	1.21138
sp|P42694|HELZ_HUMAN	HELZ_HUMAN	HELZ	0.970599	0.98519	0.340205	-0.993254
sp|P05141|ADT2_HUMAN	ADT2_HUMAN	SLC25A5	3.44564	1.85624	0.339447	-0.404549
sp|Q9NRZ9|HELLS_HUMAN	HELLS_HUMAN	HELLS	0	0	0.335049	-0.919163
sp|Q9Y4P3|TBL2_HUMAN	TBL2_HUMAN	TBL2	1.01246	1.00621	0.334654	-0.933265
sp|Q9Y5V3|MAGD1_HUMAN	MAGD1_HUMAN	MAGED1	1.18801	1.08996	0.332987	-0.544072
sp|Q9HCU5|PREB_HUMAN	PREB_HUMAN	PREB	2.63767	1.62409	0.332033	-0.937891
sp|P08243|ASNS_HUMAN	ASNS_HUMAN	ASNS	0	0	0.331001	-0.443169
sp|P12270|TPR_HUMAN	TPR_HUMAN	TPR	6.50633	2.55075	0.329251	-0.913396
sp|P49207|RL34_HUMAN	RL34_HUMAN	RPL34	2.74403	1.65651	0.328529	0.511442
sp|P46060|RAGP1_HUMAN	RAGP1_HUMAN	RANGAP1	8.89697	2.98278	0.326178	1.39245
sp|Q14694|UBP10_HUMAN	UBP10_HUMAN	USP10	1.29272	1.13698	0.326135	-0.77286
sp|Q15637|SF01_HUMAN	SF01_HUMAN	SF1	0	0	0.325952	-0.529348
sp|Q99714|HCD2_HUMAN	HCD2_HUMAN	HSD17B10	5.75498	2.39895	0.32307	0.534106
sp|Q14241|ELOA1_HUMAN	ELOA1_HUMAN	ELOA	1.32727	1.15207	0.322914	-1.15262
sp|P55060|XPO2_HUMAN	XPO2_HUMAN	CSE1L	12.1595	3.48705	0.322732	0.807513
sp|O43592|XPOT_HUMAN	XPOT_HUMAN	XPOT	1.13648	1.06606	0.321326	-0.684793
sp|P50851|LRBA_HUMAN	LRBA_HUMAN	LRBA	4.71717	2.1719	0.316689	-1.31719
sp|Q15555|MARE2_HUMAN	MARE2_HUMAN	MAPRE2	0	0	0.316213	0.363365
sp|P42566|EPS15_HUMAN	EPS15_HUMAN	EPS15	10.3322	3.21438	0.314682	-0.950261
sp|P62750|RL23A_HUMAN	RL23A_HUMAN	RPL23A	4.26356	2.06484	0.312091	0.3543
sp|Q9HBM0|VEZA_HUMAN	VEZA_HUMAN	VEZT	0	0	0.310668	-0.939765
sp|P20340|RAB6A_HUMAN	RAB6A_HUMAN	RAB6A	17.7134	4.20873	0.308733	-1.23639
sp|P55072|TERA_HUMAN	TERA_HUMAN	VCP	2.36105	1.53657	0.308491	0.703667
sp|Q9UEY8|ADDG_HUMAN	ADDG_HUMAN	ADD3	6.11297	2.47244	0.307887	0.834655
sp|Q8TAA9|VANG1_HUMAN	VANG1_HUMAN	VANGL1	0	0	0.307663	-0.737026
sp|Q5JTV8|TOIP1_HUMAN	TOIP1_HUMAN	TOR1AIP1	2.75391	1.65949	0.304644	-0.697435
sp|Q7Z5P9|MUC19_HUMAN	MUC19_HUMAN	MUC19	0	0	0.303846	1.54
sp|Q9Y3C1|NOP16_HUMAN	NOP16_HUMAN	NOP16	0	0	0.302748	0.823484
sp|Q8WTT2|NOC3L_HUMAN	NOC3L_HUMAN	NOC3L	3.23934	1.79982	0.30274	-0.806005
sp|Q13480|GAB1_HUMAN	GAB1_HUMAN	GAB1	0	0	0.302719	0.464342
sp|P22681|CBL_HUMAN	CBL_HUMAN	CBL	1.19721	1.09417	0.301597	-0.642249
sp|Q7Z4H7|HAUS6_HUMAN	HAUS6_HUMAN	HAUS6	4.95515	2.22602	0.298712	1.22339
sp|Q15907|RB11B_HUMAN	RB11B_HUMAN	RAB11B	0	0	0.29809	1.43653
sp|Q9UNZ2|NSF1C_HUMAN	NSF1C_HUMAN	NSFL1C	2.17866	1.47603	0.29724	0.632882
sp|Q6NSJ2|PHLB3_HUMAN	PHLB3_HUMAN	PHLDB3	0	0	0.297188	0.467143
sp|Q9NX58|LYAR_HUMAN	LYAR_HUMAN	LYAR	5.77428	2.40297	0.295122	0.435854
sp|P11021|GRP78_HUMAN	GRP78_HUMAN	HSPA5	4.37066	2.09061	0.294153	0.907628
sp|P50991|TCPD_HUMAN	TCPD_HUMAN	CCT4	3.39108	1.84149	0.293957	0.58558
sp|P07355|ANXA2_HUMAN;sp|A6NMY6|AXA2L_HUMAN	ANXA2_HUMAN	ANXA2	1.0105	1.00524	0.291769	-0.763543
sp|P47914|RL29_HUMAN	RL29_HUMAN	RPL29	2.4144	1.55384	0.291538	0.469922
sp|O00203|AP3B1_HUMAN	AP3B1_HUMAN	AP3B1	0	0	0.290291	0.590759
sp|P22102|PUR2_HUMAN	PUR2_HUMAN	GART	0	0	0.288839	-0.728047
sp|Q6PML9|ZNT9_HUMAN	ZNT9_HUMAN	SLC30A9	2.55923	1.59976	0.28859	-1.091
sp|P46109|CRKL_HUMAN	CRKL_HUMAN	CRKL	4.14714	2.03645	0.288399	0.665634
sp|Q9H2G2|SLK_HUMAN	SLK_HUMAN	SLK	4.91658	2.21734	0.287956	1.15687
sp|O60763|USO1_HUMAN	USO1_HUMAN	USO1	0	0	0.28606	-0.53201
sp|O95232|LC7L3_HUMAN	LC7L3_HUMAN	LUC7L3	0	0	0.285988	-0.688946
sp|Q9NSE4|SYIM_HUMAN	SYIM_HUMAN	IARS2	4.39308	2.09597	0.285001	-1.1194
sp|Q96H55|MYO19_HUMAN	MYO19_HUMAN	MYO19	0	0	0.281412	0.413101
sp|P63261|ACTG_HUMAN;sp|P60709|ACTB_HUMAN	ACTG_HUMAN	ACTG1	0	0	0.281086	0.609484
sp|Q71U36|TBA1A_HUMAN	TBA1A_HUMAN	TUBA1A	0	0	0.280771	-0.712922
sp|Q92997|DVL3_HUMAN	DVL3_HUMAN	DVL3	5.13395	2.26582	0.279599	0.954816
sp|P78310|CXAR_HUMAN	CXAR_HUMAN	CXADR	1.71652	1.31016	0.278421	0.642659
sp|Q14739|LBR_HUMAN	LBR_HUMAN	LBR	2.77155	1.6648	0.275029	-0.729577
sp|P61604|CH10_HUMAN	CH10_HUMAN	HSPE1	3.65459	1.9117	0.274857	0.710241
sp|O76094|SRP72_HUMAN	SRP72_HUMAN	SRP72	0	0	0.273419	-0.605662
sp|P11274|BCR_HUMAN	BCR_HUMAN	BCR	3.24281	1.80078	0.270446	-1.00342
sp|Q2NKX8|ERC6L_HUMAN	ERC6L_HUMAN	ERCC6L	1.37669	1.17333	0.270213	-1.06294
sp|Q8N5K1|CISD2_HUMAN	CISD2_HUMAN	CISD2	0.621683	0.788469	0.270128	-0.908685
sp|Q9C0C4|SEM4C_HUMAN	SEM4C_HUMAN	SEMA4C	0	0	0.269923	0.728478
sp|E9PAV3|NACAM_HUMAN;sp|Q13765|NACA_HUMAN	NACAM_HUMAN	NACA	1.29127	1.13634	0.269327	-0.911138
sp|O75381|PEX14_HUMAN	PEX14_HUMAN	PEX14	4.76796	2.18357	0.269235	0.993483
sp|Q13136|LIPA1_HUMAN	LIPA1_HUMAN	PPFIA1	1.03541	1.01755	0.269094	-0.681439
sp|P29597|TYK2_HUMAN	TYK2_HUMAN	TYK2	1.20559	1.098	0.267828	-0.913378
sp|O60231|DHX16_HUMAN	DHX16_HUMAN	DHX16	2.63589	1.62354	0.267052	0.4992
sp|P84098|RL19_HUMAN	RL19_HUMAN	RPL19	3.45995	1.8601	0.266882	-0.298805
sp|P49368|TCPG_HUMAN	TCPG_HUMAN	CCT3	2.32357	1.52433	0.265757	0.679027
sp|Q7Z7G8|VP13B_HUMAN	VP13B_HUMAN	VPS13B	1.32312	1.15027	0.265561	-0.750032
sp|Q9Y6M5|ZNT1_HUMAN	ZNT1_HUMAN	SLC30A1	0	0	0.263525	-0.587573
sp|Q9UIQ6|LCAP_HUMAN	LCAP_HUMAN	LNPEP	0	0	0.262973	-0.622549
sp|P53007|TXTP_HUMAN	TXTP_HUMAN	SLC25A1	1.22265	1.10574	0.261089	0.81065
sp|Q9NYJ8|TAB2_HUMAN	TAB2_HUMAN	TAB2	0	0	0.260794	-0.554822
sp|Q9NVN8|GNL3L_HUMAN	GNL3L_HUMAN	GNL3L	4.25423	2.06258	0.260406	-0.79352
sp|P84077|ARF1_HUMAN;sp|P61204|ARF3_HUMAN	ARF1_HUMAN	ARF1	2.96345	1.72147	0.260051	0.437403
sp|P50502|F10A1_HUMAN;sp|Q8NFI4|F10A5_HUMAN;sp|Q8IZP2|ST134_HUMAN	F10A1_HUMAN	ST13	6.19601	2.48918	0.258797	0.831899
sp|P78527|PRKDC_HUMAN	PRKDC_HUMAN	PRKDC	6.28623	2.50724	0.256288	-0.725635
sp|O75533|SF3B1_HUMAN	SF3B1_HUMAN	SF3B1	0	0	0.255362	-0.622005
sp|Q5T6F2|UBAP2_HUMAN	UBAP2_HUMAN	UBAP2	3.45977	1.86005	0.254983	0.729135
sp|P62979|RS27A_HUMAN;sp|P0CG47|UBB_HUMAN;sp|P0CG48|UBC_HUMAN	RS27A_HUMAN	RPS27A	4.41782	2.10186	0.253972	-0.225911
sp|Q9NYV4|CDK12_HUMAN	CDK12_HUMAN	CDK12	0	0	0.253214	-0.57637
sp|P30837|AL1B1_HUMAN	AL1B1_HUMAN	ALDH1B1	0	0	0.25168	-0.359886
sp|Q15648|MED1_HUMAN	MED1_HUMAN	MED1	0	0	0.251525	-0.409225
sp|Q9Y383|LC7L2_HUMAN	LC7L2_HUMAN	LUC7L2	5.65506	2.37804	0.249647	0.896919
sp|Q9Y266|NUDC_HUMAN	NUDC_HUMAN	NUDC	3.22468	1.79574	0.248096	-0.486078
sp|O75694|NU155_HUMAN	NU155_HUMAN	NUP155	2.00665	1.41656	0.245179	-0.952235
sp|Q9Y6R0|NUMBL_HUMAN	NUMBL_HUMAN	NUMBL	0	0	0.241414	-0.662411
sp|Q13492|PICAL_HUMAN	PICAL_HUMAN	PICALM	8.11765	2.84915	0.239392	0.559638
sp|P16949|STMN1_HUMAN	STMN1_HUMAN	STMN1	3.18695	1.7852	0.237915	0.692101
sp|Q14008|CKAP5_HUMAN	CKAP5_HUMAN	CKAP5	3.79693	1.94857	0.23779	-1.09246
sp|Q9Y4I1|MYO5A_HUMAN	MYO5A_HUMAN	MYO5A	2.74901	1.65801	0.236627	0.452937
sp|Q6ZUT1|CK057_HUMAN	CK057_HUMAN	NKAPD1	2.73527	1.65387	0.236501	0.562494
sp|Q14103|HNRPD_HUMAN	HNRPD_HUMAN	HNRNPD	3.98484	1.99621	0.236033	0.409738
sp|P62277|RS13_HUMAN	RS13_HUMAN	RPS13	2.54159	1.59424	0.235655	0.791406
sp|O00571|DDX3X_HUMAN;sp|O15523|DDX3Y_HUMAN	DDX3X_HUMAN	DDX3X	3.55492	1.88545	0.234517	0.893277
sp|Q9HCD6|TANC2_HUMAN	TANC2_HUMAN	TANC2	0	0	0.232515	0.547172
sp|Q96G28|CFA36_HUMAN	CFA36_HUMAN	CFAP36	0	0	0.230874	0.2938
sp|O43896|KIF1C_HUMAN	KIF1C_HUMAN	KIF1C	0	0	0.230538	-0.32398
sp|Q5VT66|MARC1_HUMAN	MARC1_HUMAN	MARC1	3.91434	1.97847	0.228985	-0.64133
sp|Q9H1E3|NUCKS_HUMAN	NUCKS_HUMAN	NUCKS1	0	0	0.226289	0.509871
sp|O95470|SGPL1_HUMAN	SGPL1_HUMAN	SGPL1	3.41352	1.84757	0.22471	-0.865738
sp|Q9NUQ8|ABCF3_HUMAN	ABCF3_HUMAN	ABCF3	0	0	0.223946	-0.357592
sp|P06576|ATPB_HUMAN	ATPB_HUMAN	ATP5F1B	4.03035	2.00757	0.223203	0.523659
sp|P38646|GRP75_HUMAN	GRP75_HUMAN	HSPA9	10.1765	3.19006	0.223087	0.826052
sp|Q03001|DYST_HUMAN	DYST_HUMAN	DST	11.0968	3.33119	0.222412	1.01239
sp|Q92692|NECT2_HUMAN	NECT2_HUMAN	NECTIN2	0	0	0.221572	-0.427508
sp|O14681|EI24_HUMAN	EI24_HUMAN	EI24	0	0	0.221392	0.384327
sp|P49257|LMAN1_HUMAN	LMAN1_HUMAN	LMAN1	1.30934	1.14426	0.220203	-0.943743
sp|Q5VT25|MRCKA_HUMAN	MRCKA_HUMAN	CDC42BPA	0	0	0.220185	-0.771153
sp|Q9Y613|FHOD1_HUMAN	FHOD1_HUMAN	FHOD1	1.51895	1.23246	0.21937	0.435943
sp|Q7KZF4|SND1_HUMAN	SND1_HUMAN	SND1	3.91235	1.97797	0.216406	0.79419
sp|Q9NVI7|ATD3A_HUMAN	ATD3A_HUMAN	ATAD3A	2.12436	1.45752	0.213875	-0.600385
sp|P23528|COF1_HUMAN	COF1_HUMAN	CFL1	1.46876	1.21192	0.213419	-0.596431
sp|Q86T24|KAISO_HUMAN	KAISO_HUMAN	ZBTB33	0	0	0.212627	0.477079
sp|Q8NBN3|TM87A_HUMAN	TM87A_HUMAN	TMEM87A	5.36321	2.31586	0.210948	0.769631
sp|P53804|TTC3_HUMAN	TTC3_HUMAN	TTC3	1.95758	1.39914	0.209999	-0.680609
sp|P42677|RS27_HUMAN	RS27_HUMAN	RPS27	2.4849	1.57636	0.209963	-0.351825
sp|P52594|AGFG1_HUMAN	AGFG1_HUMAN	AGFG1	0	0	0.20978	0.538099
sp|P68363|TBA1B_HUMAN	TBA1B_HUMAN	TUBA1B	5.80954	2.4103	0.208311	0.195689
sp|P41250|GARS_HUMAN	GARS_HUMAN	GARS	0	0	0.208111	0.305372
sp|Q93045|STMN2_HUMAN	STMN2_HUMAN	STMN2	0	0	0.207933	0.589033
sp|Q86TX2|ACOT1_HUMAN	ACOT1_HUMAN	ACOT1	1.96346	1.40123	0.206766	-0.900515
sp|P19338|NUCL_HUMAN	NUCL_HUMAN	NCL	3.53018	1.87888	0.205929	-0.749812
sp|O15294|OGT1_HUMAN	OGT1_HUMAN	OGT	0	0	0.205652	0.523472
sp|Q96P70|IPO9_HUMAN	IPO9_HUMAN	IPO9	2.69682	1.6422	0.205171	0.445897
sp|Q15311|RBP1_HUMAN	RBP1_HUMAN	RALBP1	0	0	0.204953	-0.723189
sp|Q9NS69|TOM22_HUMAN	TOM22_HUMAN	TOMM22	1.14005	1.06773	0.204847	0.618737
sp|P62829|RL23_HUMAN	RL23_HUMAN	RPL23	3.75428	1.9376	0.204353	-0.251867
sp|P49327|FAS_HUMAN	FAS_HUMAN	FASN	12.4144	3.5234	0.204295	0.360153
sp|Q9H2H9|S38A1_HUMAN	S38A1_HUMAN	SLC38A1	1.74162	1.31971	0.203437	0.872035
sp|Q9NQC3|RTN4_HUMAN	RTN4_HUMAN	RTN4	2.1215	1.45654	0.201624	-0.752403
sp|Q9Y5K6|CD2AP_HUMAN	CD2AP_HUMAN	CD2AP	3.22489	1.7958	0.201572	0.768096
sp|O94991|SLIK5_HUMAN	SLIK5_HUMAN	SLITRK5	1.83295	1.35386	0.200672	-0.701193
sp|Q9GZT9|EGLN1_HUMAN	EGLN1_HUMAN	EGLN1	26.1935	5.11796	0.200329	0.377464
sp|Q13586|STIM1_HUMAN	STIM1_HUMAN	STIM1	1.97256	1.40448	0.200106	-0.736071
sp|P68431|H31_HUMAN;sp|Q71DI3|H32_HUMAN;sp|Q16695|H31T_HUMAN;sp|P84243|H33_HUMAN;sp|Q6NXT2|H3C_HUMAN	H31_HUMAN	HIST1H3A	0	0	0.19787	0.684655
sp|Q9BXW9|FACD2_HUMAN	FACD2_HUMAN	FANCD2	0	0	0.195865	-0.461374
sp|Q9HB21|PKHA1_HUMAN	PKHA1_HUMAN	PLEKHA1	0	0	0.193246	-0.322941
sp|Q8WY36|BBX_HUMAN	BBX_HUMAN	BBX	2.24931	1.49977	0.193181	-0.717536
sp|Q9P0K7|RAI14_HUMAN	RAI14_HUMAN	RAI14	3.70289	1.92429	0.193017	-0.753373
sp|O00763|ACACB_HUMAN	ACACB_HUMAN	ACACB	12.15	3.48568	0.189675	0.893225
sp|O60716|CTND1_HUMAN	CTND1_HUMAN	CTNND1	7.50761	2.74	0.189265	-0.675124
sp|Q8N350|CBARP_HUMAN	CBARP_HUMAN	CBARP	0	0	0.188174	0.586084
sp|Q9H425|CA198_HUMAN	CA198_HUMAN	C1orf198	0	0	0.18727	-0.312125
sp|Q9P227|RHG23_HUMAN	RHG23_HUMAN	ARHGAP23	0	0	0.187241	-0.272437
sp|P10809|CH60_HUMAN	CH60_HUMAN	HSPD1	4.05022	2.01252	0.186289	0.626062
sp|Q9UM54|MYO6_HUMAN	MYO6_HUMAN	MYO6	1.37769	1.17375	0.186154	0.573502
sp|Q99613|EIF3C_HUMAN;sp|B5ME19|EIFCL_HUMAN	EIF3C_HUMAN	EIF3C	3.38148	1.83888	0.185562	0.404345
sp|P14209|CD99_HUMAN	CD99_HUMAN	CD99	0	0	0.184309	0.295249
sp|Q8TBA6|GOGA5_HUMAN	GOGA5_HUMAN	GOLGA5	3.67475	1.91696	0.181421	0.740572
sp|Q9H2J7|S6A15_HUMAN	S6A15_HUMAN	SLC6A15	3.59064	1.8949	0.18066	0.346194
sp|Q641Q2|WAC2A_HUMAN;sp|Q9Y4E1|WAC2C_HUMAN	WAC2A_HUMAN	WASHC2A	0	0	0.180081	-0.39721
sp|Q9NRN7|ADPPT_HUMAN	ADPPT_HUMAN	AASDHPPT	0	0	0.180045	-0.316154
sp|Q9Y2H6|FND3A_HUMAN	FND3A_HUMAN	FNDC3A	1.31993	1.14888	0.179273	-0.666655
sp|P07900|HS90A_HUMAN	HS90A_HUMAN	HSP90AA1	7.4448	2.72852	0.176784	0.673395
sp|Q5T5U3|RHG21_HUMAN	RHG21_HUMAN	ARHGAP21	1.66521	1.29043	0.172772	-0.400835
sp|P35579|MYH9_HUMAN	MYH9_HUMAN	MYH9	5.3491	2.31281	0.171377	-0.65679
sp|Q9Y490|TLN1_HUMAN	TLN1_HUMAN	TLN1	6.94231	2.63483	0.170699	0.657761
sp|P46782|RS5_HUMAN	RS5_HUMAN	RPS5	1.00346	1.00173	0.170284	0.621098
sp|Q14596|NBR1_HUMAN	NBR1_HUMAN	NBR1	0	0	0.169716	0.358374
sp|Q08945|SSRP1_HUMAN	SSRP1_HUMAN	SSRP1	0	0	0.168309	0.345578
sp|Q9UBM7|DHCR7_HUMAN	DHCR7_HUMAN	DHCR7	0.957469	0.978503	0.166829	-0.584136
sp|Q12959|DLG1_HUMAN	DLG1_HUMAN	DLG1	0.897528	0.94738	0.165195	-0.460815
sp|Q9Y2J2|E41L3_HUMAN	E41L3_HUMAN	EPB41L3	3.35354	1.83127	0.163818	-0.519134
sp|Q9HB71|CYBP_HUMAN	CYBP_HUMAN	CACYBP	3.18487	1.78462	0.162316	0.53677
sp|O00483|NDUA4_HUMAN	NDUA4_HUMAN	NDUFA4	0	0	0.16152	-0.443238
sp|O95613|PCNT_HUMAN	PCNT_HUMAN	PCNT	3.6002	1.89742	0.16092	0.702846
sp|Q15836|VAMP3_HUMAN	VAMP3_HUMAN	VAMP3	0.85308	0.923623	0.160848	-0.485884
sp|Q58EX7|PKHG4_HUMAN	PKHG4_HUMAN	PLEKHG4	0	0	0.158971	-0.310278
sp|Q96JH7|VCIP1_HUMAN	VCIP1_HUMAN	VCPIP1	4.27863	2.06848	0.158069	0.735554
sp|P27824|CALX_HUMAN	CALX_HUMAN	CANX	3.16258	1.77836	0.157898	-0.577894
sp|P15924|DESP_HUMAN	DESP_HUMAN	DSP	4.48515	2.11782	0.155341	-0.74186
sp|O00567|NOP56_HUMAN	NOP56_HUMAN	NOP56	2.44345	1.56315	0.153826	-0.626966
sp|O75821|EIF3G_HUMAN	EIF3G_HUMAN	EIF3G	0	0	0.153597	0.317851
sp|Q96SN8|CK5P2_HUMAN	CK5P2_HUMAN	CDK5RAP2	0	0	0.153446	-0.508841
sp|Q9UBF2|COPG2_HUMAN	COPG2_HUMAN	COPG2	3.42312	1.85017	0.153194	0.538817
sp|Q9Y265|RUVB1_HUMAN	RUVB1_HUMAN	RUVBL1	3.17525	1.78192	0.149167	0.593243
sp|Q14789|GOGB1_HUMAN	GOGB1_HUMAN	GOLGB1	10.5525	3.24847	0.148782	0.687844
sp|Q9H082|RB33B_HUMAN	RB33B_HUMAN	RAB33B	3.84303	1.96037	0.147762	0.82536
sp|P18206|VINC_HUMAN	VINC_HUMAN	VCL	14.5494	3.81436	0.147499	0.68768
sp|Q9Y2U8|MAN1_HUMAN	MAN1_HUMAN	LEMD3	1.9716	1.40414	0.147325	0.494955
sp|Q9NWT8|AKIP_HUMAN	AKIP_HUMAN	AURKAIP1	59.9825	7.74484	0.146469	-0.59403
sp|Q7Z478|DHX29_HUMAN	DHX29_HUMAN	DHX29	4.57843	2.13973	0.145259	0.556794
sp|O15357|SHIP2_HUMAN	SHIP2_HUMAN	INPPL1	2.7343	1.65357	0.143596	0.189772
sp|O75683|SURF6_HUMAN	SURF6_HUMAN	SURF6	3.87419	1.9683	0.14326	0.640976
sp|Q9Y2I7|FYV1_HUMAN	FYV1_HUMAN	PIKFYVE	4.01017	2.00254	0.142298	0.30944
sp|A1X283|SPD2B_HUMAN	SPD2B_HUMAN	SH3PXD2B	0	0	0.141958	0.380303
sp|Q8IY17|PLPL6_HUMAN	PLPL6_HUMAN	PNPLA6	2.40546	1.55096	0.141835	-0.605721
sp|P00387|NB5R3_HUMAN	NB5R3_HUMAN	CYB5R3	3.22605	1.79612	0.139485	0.293226
sp|Q96JB5|CK5P3_HUMAN	CK5P3_HUMAN	CDK5RAP3	0	0	0.139005	-0.316825
sp|Q9Y679|AUP1_HUMAN	AUP1_HUMAN	AUP1	0	0	0.138733	-0.398308
sp|P47712|PA24A_HUMAN	PA24A_HUMAN	PLA2G4A	0	0	0.138536	-0.397026
sp|Q16650|TBR1_HUMAN	TBR1_HUMAN	TBR1	0	0	0.137279	-0.293671
sp|Q5SW79|CE170_HUMAN	CE170_HUMAN	CEP170	4.03032	2.00757	0.136955	-0.624526
sp|P54578|UBP14_HUMAN	UBP14_HUMAN	USP14	0	0	0.135771	-0.299636
sp|Q9NZ45|CISD1_HUMAN	CISD1_HUMAN	CISD1	1.69274	1.30105	0.135265	0.311452
sp|P15311|EZRI_HUMAN	EZRI_HUMAN	EZR	4.676	2.16241	0.133669	0.387392
sp|Q5VTE0|EF1A3_HUMAN;sp|P68104|EF1A1_HUMAN	EF1A3_HUMAN	EEF1A1P5	7.01501	2.64859	0.133476	0.160506
sp|O00443|P3C2A_HUMAN	P3C2A_HUMAN	PIK3C2A	7.31124	2.70393	0.133058	-0.539932
sp|A0FGR8|ESYT2_HUMAN	ESYT2_HUMAN	ESYT2	3.18048	1.78339	0.132139	-0.423517
sp|P26373|RL13_HUMAN	RL13_HUMAN	RPL13	2.77232	1.66503	0.130431	-0.200664
sp|Q9Y678|COPG1_HUMAN	COPG1_HUMAN	COPG1	2.14194	1.46354	0.128282	-0.284612
sp|P51572|BAP31_HUMAN	BAP31_HUMAN	BCAP31	0	0	0.127812	-0.35209
sp|Q6ZSR9|YJ005_HUMAN	YJ005_HUMAN	FLJ45252	0	0	0.126261	-0.301058
sp|Q4VCS5|AMOT_HUMAN	AMOT_HUMAN	AMOT	2.75295	1.6592	0.121623	-0.680411
sp|Q8IY81|SPB1_HUMAN	SPB1_HUMAN	FTSJ3	3.67656	1.91744	0.121466	-0.308895
sp|Q8IYB3|SRRM1_HUMAN	SRRM1_HUMAN	SRRM1	6.13352	2.4766	0.119979	0.450404
sp|Q63HN8|RN213_HUMAN	RN213_HUMAN	RNF213	2.8105	1.67646	0.118402	0.375081
sp|Q5HYI8|RABL3_HUMAN	RABL3_HUMAN	RABL3	1.3943	1.1808	0.118063	-0.45141
sp|P34932|HSP74_HUMAN	HSP74_HUMAN	HSPA4	7.33595	2.7085	0.118003	0.368423
sp|Q9NVU7|SDA1_HUMAN	SDA1_HUMAN	SDAD1	2.02576	1.42329	0.117657	0.603669
sp|P05023|AT1A1_HUMAN	AT1A1_HUMAN	ATP1A1	2.97462	1.72471	0.117617	-0.401144
sp|Q9UPW5|CBPC1_HUMAN	CBPC1_HUMAN	AGTPBP1	4.33862	2.08294	0.1175	-0.354118
sp|P06748|NPM_HUMAN	NPM_HUMAN	NPM1	1.71361	1.30905	0.116577	0.442742
sp|Q9H6S0|YTDC2_HUMAN	YTDC2_HUMAN	YTHDC2	2.41027	1.5525	0.111648	0.279107
sp|Q86UB9|TM135_HUMAN	TM135_HUMAN	TMEM135	12.3372	3.51243	0.110977	-0.331883
sp|P28340|DPOD1_HUMAN	DPOD1_HUMAN	POLD1	0	0	0.110016	-0.231963
sp|Q53EZ4|CEP55_HUMAN	CEP55_HUMAN	CEP55	2.56901	1.60281	0.109946	0.228042
sp|Q5VZ89|DEN4C_HUMAN	DEN4C_HUMAN	DENND4C	1.22885	1.10853	0.109336	-0.506929
sp|Q14160|SCRIB_HUMAN	SCRIB_HUMAN	SCRIB	0.937538	0.968266	0.109046	-0.432499
sp|P48444|COPD_HUMAN	COPD_HUMAN	ARCN1	1.49513	1.22276	0.108111	0.365331
sp|Q71RC2|LARP4_HUMAN	LARP4_HUMAN	LARP4	2.91418	1.7071	0.108047	0.389813
sp|Q13613|MTMR1_HUMAN	MTMR1_HUMAN	MTMR1	1.83947	1.35627	0.107015	0.229039
sp|O95202|LETM1_HUMAN	LETM1_HUMAN	LETM1	8.3817	2.89512	0.106761	0.459047
sp|Q9ULH7|MKL2_HUMAN	MKL2_HUMAN	MRTFB	3.42278	1.85008	0.105981	0.415848
sp|P55196|AFAD_HUMAN	AFAD_HUMAN	AFDN	10.0465	3.16962	0.104423	-0.439164
sp|Q9UPV9|TRAK1_HUMAN	TRAK1_HUMAN	TRAK1	0	0	0.102445	0.200716
sp|P40855|PEX19_HUMAN	PEX19_HUMAN	PEX19	0	0	0.101788	0.363432
sp|Q12955|ANK3_HUMAN	ANK3_HUMAN	ANK3	0	0	0.101637	0.236976
sp|Q96AC1|FERM2_HUMAN	FERM2_HUMAN	FERMT2	7.89725	2.8102	0.0999803	-0.258481
sp|O14617|AP3D1_HUMAN	AP3D1_HUMAN	AP3D1	5.29288	2.30063	0.0970469	-0.156791
sp|Q96RQ3|MCCA_HUMAN	MCCA_HUMAN	MCCC1	6.30491	2.51096	0.0966358	-0.327154
sp|Q9Y666|S12A7_HUMAN	S12A7_HUMAN	SLC12A7	0	0	0.096528	0.316817
sp|P49411|EFTU_HUMAN	EFTU_HUMAN	TUFM	3.13446	1.77044	0.0961487	-0.22984
sp|O60831|PRAF2_HUMAN	PRAF2_HUMAN	PRAF2	0	0	0.0959513	-0.189478
sp|P42704|LPPRC_HUMAN	LPPRC_HUMAN	LRPPRC	8.33353	2.88678	0.0951947	0.450295
sp|Q9Y3D7|TIM16_HUMAN	TIM16_HUMAN	PAM16	0	0	0.0950617	0.168843
sp|Q96R06|SPAG5_HUMAN	SPAG5_HUMAN	SPAG5	2.54471	1.59522	0.0943071	0.332198
sp|Q8IZH2|XRN1_HUMAN	XRN1_HUMAN	XRN1	4.90329	2.21434	0.0942165	0.477176
sp|O75179|ANR17_HUMAN	ANR17_HUMAN	ANKRD17	1.6769	1.29495	0.0941169	0.408043
sp|P30101|PDIA3_HUMAN	PDIA3_HUMAN	PDIA3	4.30113	2.07392	0.0939259	-0.127019
sp|Q05397|FAK1_HUMAN	FAK1_HUMAN	PTK2	2.88573	1.69874	0.0938905	-0.172227
sp|Q9UHB9|SRP68_HUMAN	SRP68_HUMAN	SRP68	4.25174	2.06197	0.0938758	-0.389826
sp|Q05823|RN5A_HUMAN	RN5A_HUMAN	RNASEL	1.36336	1.16763	0.0935986	-0.199767
sp|Q9Y450|HBS1L_HUMAN	HBS1L_HUMAN	HBS1L	1.13095	1.06346	0.0934531	0.321293
sp|P40616|ARL1_HUMAN	ARL1_HUMAN	ARL1	0	0	0.0931191	0.224908
sp|Q92540|SMG7_HUMAN	SMG7_HUMAN	SMG7	1.05234	1.02584	0.0919739	-0.314296
sp|Q92575|UBXN4_HUMAN	UBXN4_HUMAN	UBXN4	3.66362	1.91406	0.0914143	0.22421
sp|Q07820|MCL1_HUMAN	MCL1_HUMAN	MCL1	5.0694	2.25153	0.0907232	0.271629
sp|P53367|ARFP1_HUMAN	ARFP1_HUMAN	ARFIP1	2.21723	1.48904	0.0902833	-0.23527
sp|P62304|RUXE_HUMAN	RUXE_HUMAN	SNRPE	2.70256	1.64395	0.089946	0.241722
sp|Q9Y2Z0|SGT1_HUMAN	SGT1_HUMAN	SUGT1	2.9702	1.72343	0.0898903	-0.356322
sp|Q1ED39|KNOP1_HUMAN	KNOP1_HUMAN	KNOP1	3.42741	1.85133	0.0895951	-0.310992
sp|P07437|TBB5_HUMAN	TBB5_HUMAN	TUBB	5.91996	2.4331	0.0883615	0.171736
sp|P40763|STAT3_HUMAN	STAT3_HUMAN	STAT3	1.65375	1.28598	0.0881186	0.258812
sp|Q14157|UBP2L_HUMAN	UBP2L_HUMAN	UBAP2L	2.46569	1.57025	0.0878819	0.328907
sp|P29966|MARCS_HUMAN	MARCS_HUMAN	MARCKS	0.852155	0.923123	0.0865907	0.272421
sp|Q8TD26|CHD6_HUMAN	CHD6_HUMAN	CHD6	0	0	0.0865578	-0.152888
sp|Q8TAT6|NPL4_HUMAN	NPL4_HUMAN	NPLOC4	1.11053	1.05382	0.0863018	0.314848
sp|O95757|HS74L_HUMAN	HS74L_HUMAN	HSPA4L	5.27696	2.29716	0.086154	0.267122
sp|Q12797|ASPH_HUMAN	ASPH_HUMAN	ASPH	0	0	0.0859677	-0.180945
sp|Q9H6Z4|RANB3_HUMAN	RANB3_HUMAN	RANBP3	5.03927	2.24483	0.0858566	0.258095
sp|P68371|TBB4B_HUMAN	TBB4B_HUMAN	TUBB4B	5.98378	2.44618	0.0855757	-0.164567
sp|O00541|PESC_HUMAN	PESC_HUMAN	PES1	2.20484	1.48487	0.0853482	0.262723
sp|P05556|ITB1_HUMAN	ITB1_HUMAN	ITGB1	2.56792	1.60247	0.0850281	-0.376736
sp|Q96GQ7|DDX27_HUMAN	DDX27_HUMAN	DDX27	3.16258	1.77837	0.0839718	0.339839
sp|Q12931|TRAP1_HUMAN	TRAP1_HUMAN	TRAP1	39.9374	6.31961	0.0831319	-0.293456
sp|O15440|MRP5_HUMAN	MRP5_HUMAN	ABCC5	0	0	0.0824295	-0.248955
sp|P61513|RL37A_HUMAN	RL37A_HUMAN	RPL37A	2.83992	1.68521	0.0821603	0.210159
sp|P09874|PARP1_HUMAN	PARP1_HUMAN	PARP1	3.97544	1.99385	0.0812428	-0.170365
sp|Q6UB35|C1TM_HUMAN	C1TM_HUMAN	MTHFD1L	16.4618	4.05732	0.0803935	0.260551
sp|P05165|PCCA_HUMAN	PCCA_HUMAN	PCCA	9.84282	3.13733	0.0795885	-0.449589
sp|Q08211|DHX9_HUMAN	DHX9_HUMAN	DHX9	3.03785	1.74294	0.0793908	-0.184662
sp|Q13085|ACACA_HUMAN	ACACA_HUMAN	ACACA	22.7692	4.7717	0.0790819	0.148389
sp|Q8NEN9|PDZD8_HUMAN	PDZD8_HUMAN	PDZD8	2.52403	1.58872	0.0778364	0.344477
sp|Q86SQ0|PHLB2_HUMAN	PHLB2_HUMAN	PHLDB2	1.79482	1.33971	0.0777357	-0.294098
sp|P21796|VDAC1_HUMAN	VDAC1_HUMAN	VDAC1	0	0	0.0776801	0.22973
sp|Q9C0B7|TNG6_HUMAN	TNG6_HUMAN	TANGO6	1.58164	1.25763	0.0776307	0.223061
sp|Q9Y3U8|RL36_HUMAN	RL36_HUMAN	RPL36	1.94163	1.39342	0.0776192	0.193323
sp|Q9H3U1|UN45A_HUMAN	UN45A_HUMAN	UNC45A	4.40672	2.09922	0.0772695	0.354132
sp|Q92598|HS105_HUMAN	HS105_HUMAN	HSPH1	4.30773	2.07551	0.077039	0.375266
sp|Q86UE4|LYRIC_HUMAN	LYRIC_HUMAN	MTDH	2.69484	1.6416	0.0757748	-0.26423
sp|Q00341|VIGLN_HUMAN	VIGLN_HUMAN	HDLBP	4.89436	2.21232	0.0754956	0.363813
sp|O75113|N4BP1_HUMAN	N4BP1_HUMAN	N4BP1	6.68509	2.58555	0.0746789	-0.308763
sp|Q6Y7W6|GGYF2_HUMAN	GGYF2_HUMAN	GIGYF2	5.244	2.28998	0.0738964	0.268043
sp|Q13190|STX5_HUMAN	STX5_HUMAN	STX5	3.52875	1.8785	0.0730681	-0.302389
sp|Q92900|RENT1_HUMAN	RENT1_HUMAN	UPF1	0	0	0.0725775	-0.223881
sp|O00264|PGRC1_HUMAN	PGRC1_HUMAN	PGRMC1	1.45008	1.20419	0.0722257	-0.240463
sp|Q8IWZ3|ANKH1_HUMAN	ANKH1_HUMAN	ANKHD1	3.60206	1.89791	0.0722108	-0.407098
sp|Q96EB1|ELP4_HUMAN	ELP4_HUMAN	ELP4	0	0	0.0721513	-0.14708
sp|Q5T3I0|GPTC4_HUMAN	GPTC4_HUMAN	GPATCH4	3.46994	1.86278	0.0685506	0.211177
sp|P49454|CENPF_HUMAN	CENPF_HUMAN	CENPF	3.15482	1.77618	0.0684959	0.243909
sp|Q6ZRS2|SRCAP_HUMAN	SRCAP_HUMAN	SRCAP	0	0	0.068351	0.147839
sp|P13804|ETFA_HUMAN	ETFA_HUMAN	ETFA	0.896571	0.946874	0.0667228	-0.281086
sp|Q9H5V9|CX056_HUMAN	CX056_HUMAN	CXorf56	0	0	0.0655106	-0.244256
sp|Q9BSJ8|ESYT1_HUMAN	ESYT1_HUMAN	ESYT1	4.39114	2.09551	0.0638258	-0.261853
sp|Q6DN90|IQEC1_HUMAN	IQEC1_HUMAN	IQSEC1	0	0	0.062967	-0.13534
sp|Q12965|MYO1E_HUMAN	MYO1E_HUMAN	MYO1E	0.904868	0.951245	0.0627167	0.139884
sp|P61978|HNRPK_HUMAN	HNRPK_HUMAN	HNRNPK	1.17156	1.08239	0.0615579	-0.200291
sp|Q8IZA0|K319L_HUMAN	K319L_HUMAN	KIAA0319L	1.2755	1.12938	0.0608541	-0.180233
sp|O95373|IPO7_HUMAN	IPO7_HUMAN	IPO7	4.79262	2.18921	0.0608249	0.273025
sp|P11498|PYC_HUMAN	PYC_HUMAN	PC	16.7294	4.09016	0.0598577	0.126194
sp|O14976|GAK_HUMAN	GAK_HUMAN	GAK	2.59551	1.61106	0.0594231	0.216262
sp|O95573|ACSL3_HUMAN	ACSL3_HUMAN	ACSL3	0.95291	0.976171	0.0586928	-0.235776
sp|P11717|MPRI_HUMAN	MPRI_HUMAN	IGF2R	3.51536	1.87493	0.0579519	0.255239
sp|P62805|H4_HUMAN	H4_HUMAN	HIST1H4A	0	0	0.0575351	0.208738
sp|P62910|RL32_HUMAN	RL32_HUMAN	RPL32	2.78322	1.6683	0.0572887	-0.178158
sp|P11171|41_HUMAN	41_HUMAN	EPB41	4.57569	2.13909	0.0571779	0.26509
sp|P35241|RADI_HUMAN	RADI_HUMAN	RDX	0	0	0.0570068	-0.0924653
sp|Q14974|IMB1_HUMAN	IMB1_HUMAN	KPNB1	4.31396	2.07701	0.0562678	-0.21852
sp|P62917|RL8_HUMAN	RL8_HUMAN	RPL8	1.30409	1.14197	0.0544723	-0.206036
sp|P62244|RS15A_HUMAN	RS15A_HUMAN	RPS15A	1.78354	1.33549	0.0541794	-0.216657
sp|P27816|MAP4_HUMAN	MAP4_HUMAN	MAP4	3.59877	1.89704	0.0533256	0.260653
sp|O14654|IRS4_HUMAN	IRS4_HUMAN	IRS4	7.05466	2.65606	0.0532963	0.273706
sp|P49458|SRP09_HUMAN	SRP09_HUMAN	SRP9	0	0	0.0530904	0.126992
sp|Q9UK73|FEM1B_HUMAN	FEM1B_HUMAN	FEM1B	0	0	0.0523239	-0.0650407
sp|P48047|ATPO_HUMAN	ATPO_HUMAN	ATP5PO	0	0	0.0522098	0.132612
sp|Q92841|DDX17_HUMAN	DDX17_HUMAN	DDX17	0	0	0.0504542	0.166846
sp|P46108|CRK_HUMAN	CRK_HUMAN	CRK	3.72882	1.93102	0.0504071	-0.132994
sp|O95292|VAPB_HUMAN	VAPB_HUMAN	VAPB	2.29218	1.51399	0.0491497	-0.166341
sp|Q9Y4W6|AFG32_HUMAN	AFG32_HUMAN	AFG3L2	4.40097	2.09785	0.0488186	-0.182608
sp|Q9BVC6|TM109_HUMAN	TM109_HUMAN	TMEM109	0	0	0.0475035	-0.114543
sp|P24723|KPCL_HUMAN	KPCL_HUMAN	PRKCH	0	0	0.0471043	-0.0724836
sp|P60891|PRPS1_HUMAN;sp|P21108|PRPS3_HUMAN;sp|P11908|PRPS2_HUMAN	PRPS1_HUMAN	PRPS1	2.74399	1.6565	0.0458773	-0.122696
sp|Q00839|HNRPU_HUMAN	HNRPU_HUMAN	HNRNPU	1.83321	1.35396	0.0453314	-0.160234
sp|Q96A65|EXOC4_HUMAN	EXOC4_HUMAN	EXOC4	4.16881	2.04177	0.0436531	0.157263
sp|O94806|KPCD3_HUMAN	KPCD3_HUMAN	PRKD3	1.73585	1.31752	0.0430233	0.0728836
sp|Q9NSV4|DIAP3_HUMAN	DIAP3_HUMAN	DIAPH3	1.27135	1.12754	0.0421928	-0.154285
sp|P62258|1433E_HUMAN	1433E_HUMAN	YWHAE	1.78358	1.33551	0.0420586	-0.123459
sp|Q96L91|EP400_HUMAN	EP400_HUMAN	EP400	0	0	0.040799	-0.0561686
sp|Q5JTC6|AMER1_HUMAN	AMER1_HUMAN	AMER1	0	0	0.0407071	0.0531871
sp|Q5HYK7|SH319_HUMAN	SH319_HUMAN	SH3D19	0	0	0.0398857	-0.112665
sp|P25398|RS12_HUMAN	RS12_HUMAN	RPS12	0.94779	0.973545	0.0388997	-0.117877
sp|O43491|E41L2_HUMAN	E41L2_HUMAN	EPB41L2	4.35452	2.08675	0.0383446	-0.145623
sp|Q9GZZ1|NAA50_HUMAN	NAA50_HUMAN	NAA50	0	0	0.0382363	0.04393
sp|O14640|DVL1_HUMAN;sp|P54792|DVLP1_HUMAN	DVL1_HUMAN	DVL1	1.6331	1.27793	0.0382347	-0.133398
sp|Q14185|DOCK1_HUMAN	DOCK1_HUMAN	DOCK1	14.0526	3.74868	0.036978	-0.150572
sp|Q86V48|LUZP1_HUMAN	LUZP1_HUMAN	LUZP1	0	0	0.0355489	0.0681432
sp|Q9UQL6|HDAC5_HUMAN	HDAC5_HUMAN	HDAC5	0	0	0.0348857	0.0961677
sp|O95433|AHSA1_HUMAN	AHSA1_HUMAN	AHSA1	8.69052	2.94797	0.0346497	0.0952067
sp|Q9BQ52|RNZ2_HUMAN	RNZ2_HUMAN	ELAC2	0	0	0.0344828	-0.102452
sp|Q96KG9|SCYL1_HUMAN	SCYL1_HUMAN	SCYL1	1.17247	1.08281	0.0334017	-0.0913801
sp|Q9NRY4|RHG35_HUMAN	RHG35_HUMAN	ARHGAP35	1.47767	1.2156	0.0332074	-0.129891
sp|P27635|RL10_HUMAN	RL10_HUMAN	RPL10	5.02347	2.24131	0.0328048	-0.0422637
sp|Q8TDD1|DDX54_HUMAN	DDX54_HUMAN	DDX54	1.73605	1.31759	0.0327489	-0.179189
sp|Q15758|AAAT_HUMAN	AAAT_HUMAN	SLC1A5	2.84222	1.68589	0.0323578	-0.0811533
sp|Q9UDY2|ZO2_HUMAN	ZO2_HUMAN	TJP2	0	0	0.0322321	0.0630365
sp|Q9H8Y8|GORS2_HUMAN	GORS2_HUMAN	GORASP2	2.34278	1.53061	0.0312583	-0.118669
sp|Q5XPI4|RN123_HUMAN	RN123_HUMAN	RNF123	1.32858	1.15264	0.0307767	-0.0847023
sp|O75663|TIPRL_HUMAN	TIPRL_HUMAN	TIPRL	2.88809	1.69944	0.030717	0.0993905
sp|Q8NFA0|UBP32_HUMAN	UBP32_HUMAN	USP32	1.98511	1.40894	0.0300472	0.075906
sp|P63173|RL38_HUMAN	RL38_HUMAN	RPL38	2.84156	1.68569	0.0295424	0.104988
sp|P36776|LONM_HUMAN	LONM_HUMAN	LONP1	2.323	1.52414	0.0286383	0.0872751
sp|P48643|TCPE_HUMAN	TCPE_HUMAN	CCT5	1.94458	1.39448	0.0285344	0.0895495
sp|Q9NZZ3|CHMP5_HUMAN	CHMP5_HUMAN	CHMP5	1.8119	1.34607	0.0279891	-0.0858236
sp|Q06830|PRDX1_HUMAN	PRDX1_HUMAN	PRDX1	2.57596	1.60498	0.0270951	-0.0483689
sp|P51970|NDUA8_HUMAN	NDUA8_HUMAN	NDUFA8	0	0	0.0267971	-0.0574634
sp|P35268|RL22_HUMAN	RL22_HUMAN	RPL22	4.59483	2.14355	0.024855	0.095878
sp|P62273|RS29_HUMAN	RS29_HUMAN	RPS29	1.88499	1.37295	0.0234894	0.11977
sp|P23588|IF4B_HUMAN	IF4B_HUMAN	EIF4B	3.5184	1.87574	0.0230529	0.0728918
sp|P16401|H15_HUMAN	H15_HUMAN	HIST1H1B	3.6686	1.91536	0.0225782	-0.0816915
sp|Q16513|PKN2_HUMAN	PKN2_HUMAN	PKN2	1.98337	1.40832	0.021897	-0.0843271
sp|P50402|EMD_HUMAN	EMD_HUMAN	EMD	2.29008	1.5133	0.0208789	-0.0659343
sp|P43487|RANG_HUMAN	RANG_HUMAN	RANBP1	3.77979	1.94417	0.0199408	-0.0966688
sp|Q96EX3|WDR34_HUMAN	WDR34_HUMAN	WDR34	0	0	0.0178571	0.0437467
sp|P42167|LAP2B_HUMAN	LAP2B_HUMAN	TMPO	4.18272	2.04517	0.0161351	-0.0348982
sp|Q562F6|SGO2_HUMAN	SGO2_HUMAN	SGO2	2.46248	1.56923	0.0145211	-0.0720639
sp|Q8N0V3|RBFA_HUMAN	RBFA_HUMAN	RBFA	0	0	0.0145095	-0.0419902
sp|Q8WWM7|ATX2L_HUMAN	ATX2L_HUMAN	ATXN2L	1.95175	1.39705	0.0144783	-0.0580712
sp|P48029|SC6A8_HUMAN	SC6A8_HUMAN	SLC6A8	0	0	0.012243	-0.0389895
sp|O43426|SYNJ1_HUMAN	SYNJ1_HUMAN	SYNJ1	3.96733	1.99181	0.0112158	-0.0525693
sp|P21333|FLNA_HUMAN	FLNA_HUMAN	FLNA	13.7371	3.70636	0.0111108	0.0427999
sp|O15067|PUR4_HUMAN	PUR4_HUMAN	PFAS	2.29849	1.51608	0.0108579	-0.0291486
sp|Q9NZ52|GGA3_HUMAN	GGA3_HUMAN	GGA3	1.91418	1.38354	0.0107371	0.036169
sp|P29317|EPHA2_HUMAN	EPHA2_HUMAN	EPHA2	0	0	0.0101421	-0.0172064
sp|O75116|ROCK2_HUMAN	ROCK2_HUMAN	ROCK2	1.85906	1.36347	0.00998493	-0.0362339
sp|O15235|RT12_HUMAN	RT12_HUMAN	MRPS12	2.65545	1.62955	0.00982782	-0.0430861
sp|Q6P1N0|C2D1A_HUMAN	C2D1A_HUMAN	CC2D1A	2.47365	1.57278	0.00944679	0.0238166
sp|Q9Y3F4|STRAP_HUMAN	STRAP_HUMAN	STRAP	2.71269	1.64702	0.00941675	-0.0239978
sp|P35613|BASI_HUMAN	BASI_HUMAN	BSG	1.12201	1.05925	0.008951	-0.0364939
sp|P12236|ADT3_HUMAN	ADT3_HUMAN	SLC25A6	6.882	2.62336	0.00766085	0.0238318
sp|Q13263|TIF1B_HUMAN	TIF1B_HUMAN	TRIM28	0	0	0.00763813	0.0224756
sp|P61026|RAB10_HUMAN	RAB10_HUMAN	RAB10	0	0	0.00644565	-0.0334337
sp|P33981|TTK_HUMAN	TTK_HUMAN	TTK	3.41785	1.84874	0.00623724	-0.0251044
sp|P28288|ABCD3_HUMAN	ABCD3_HUMAN	ABCD3	9.18325	3.03039	0.00503058	-0.0080833
sp|O15056|SYNJ2_HUMAN	SYNJ2_HUMAN	SYNJ2	0	0	0.0028908	0.0081727
sp|Q86W92|LIPB1_HUMAN	LIPB1_HUMAN	PPFIBP1	1.70966	1.30754	0.00256988	-0.0063867
sp|Q9P1Q0|VPS54_HUMAN	VPS54_HUMAN	VPS54	2.01567	1.41974	0.000977876	-0.00173424
sp|P78371|TCPB_HUMAN	TCPB_HUMAN	CCT2	2.51424	1.58564	0.00080379	-0.00359833
sp|Q9BZE4|NOG1_HUMAN	NOG1_HUMAN	GTPBP4	4.49673	2.12055	0.000373287	0.00179936
sp|O75962|TRIO_HUMAN	TRIO_HUMAN	TRIO	0	0	0.000224584	0.000509118

## Sheet: Rab5 SN
Majority protein IDs	Uniprot	Gene NAME	WD score	Root WD score	Log Student's T-test p-value Rab5 SN	Student's T-test Difference Rab5 SN
sp|Q96Q42|ALS2_HUMAN	ALS2_HUMAN	ALS2	3283.23	57.2995	20.7699	9.29973
sp|Q15276|RABE1_HUMAN	RABE1_HUMAN	RABEP1	179.807	13.4092	20.6433	7.91153
sp|P20339|RAB5A_HUMAN	RAB5A_HUMAN	RAB5A	5708.83	75.5568	19.1053	14.5628
sp|Q9UJ41|RABX5_HUMAN	RABX5_HUMAN	RABGEF1	167.461	12.9407	14.8393	5.56595
sp|Q9P2D6|F135A_HUMAN	F135A_HUMAN	FAM135A	196.288	14.0103	7.83509	6.55271
sp|Q14C86|GAPD1_HUMAN	GAPD1_HUMAN	GAPVD1	46.0065	6.78281	5.82326	8.6873
sp|P04083|ANXA1_HUMAN	ANXA1_HUMAN	ANXA1	168.196	12.969	5.58541	3.50172
sp|Q9UKA2|FBXL4_HUMAN	FBXL4_HUMAN	FBXL4	51.316	7.16352	5.57183	3.97843
sp|Q63HN8|RN213_HUMAN	RN213_HUMAN	RNF213	58.2503	7.63219	4.77303	4.74462
sp|Q9UNZ5|L10K_HUMAN	L10K_HUMAN	C19orf53	7.85023	2.80183	4.46594	3.43977
sp|O75431|MTX2_HUMAN	MTX2_HUMAN	MTX2	60.4382	7.7742	4.20189	3.64554
sp|O60271|JIP4_HUMAN	JIP4_HUMAN	SPAG9	26.6233	5.15978	3.98828	5.03377
sp|Q16643|DREB_HUMAN	DREB_HUMAN	DBN1	0	0	3.77837	2.08597
sp|A6NGR9|MROH6_HUMAN	MROH6_HUMAN	#N/A	#N/A	#N/A	3.73954	3.41468
sp|Q9HAD4|WDR41_HUMAN	WDR41_HUMAN	WDR41	6.13677	2.47725	3.25154	4.96381
sp|Q9UBC9|SPRR3_HUMAN	SPRR3_HUMAN	SPRR3	15.4627	3.93227	3.21056	2.43924
sp|Q96AG3|S2546_HUMAN	S2546_HUMAN	SLC25A46	1.78212	1.33496	2.97912	3.58
sp|Q9H3S7|PTN23_HUMAN	PTN23_HUMAN	PTPN23	25.6675	5.06631	2.88757	3.52986
sp|Q01968|OCRL_HUMAN	OCRL_HUMAN	OCRL	10.4424	3.23147	2.78808	4.62538
sp|Q9H019|MFR1L_HUMAN	MFR1L_HUMAN	MTFR1L	2.78396	1.66852	2.71243	2.47839
sp|Q14596|NBR1_HUMAN	NBR1_HUMAN	NBR1	5.8586	2.42045	2.5135	2.47931
sp|Q8TER5|ARH40_HUMAN	ARH40_HUMAN	ARHGEF40	17.8478	4.22466	2.39812	2.35987
sp|Q969Q5|RAB24_HUMAN	RAB24_HUMAN	RAB24	11.3462	3.36841	2.39516	1.58143
sp|Q96LT7|CI072_HUMAN	CI072_HUMAN	C9orf72	2.05378	1.4331	2.30725	2.00555
sp|Q9H6J7|CK049_HUMAN	CK049_HUMAN	C11orf49	2.1203	1.45613	2.26181	2.62026
sp|Q8IZT6|ASPM_HUMAN	ASPM_HUMAN	ASPM	101.847	10.0919	2.22036	2.93465
sp|Q9Y2G8|DJC16_HUMAN	DJC16_HUMAN	DNAJC16	16.5981	4.07408	2.17889	1.60229
sp|Q12872|SFSWA_HUMAN	SFSWA_HUMAN	SFSWAP	33.899	5.82229	2.17883	2.51459
sp|Q9BQ48|RM34_HUMAN	RM34_HUMAN	MRPL34	1.29522	1.13808	2.16138	3.43838
sp|Q562F6|SGO2_HUMAN	SGO2_HUMAN	SGO2	32.9393	5.73927	2.15755	4.59935
sp|P49768|PSN1_HUMAN	PSN1_HUMAN	PSEN1	0	0	2.15436	1.72392
sp|Q9Y4G8|RPGF2_HUMAN	RPGF2_HUMAN	RAPGEF2	0	0	2.10697	2.00441
sp|O14795|UN13B_HUMAN	UN13B_HUMAN	UNC13B	49.6863	7.04885	2.10268	2.41484
sp|P26374|RAE2_HUMAN	RAE2_HUMAN	CHML	17.6772	4.20442	2.04928	3.6974
sp|Q9Y613|FHOD1_HUMAN	FHOD1_HUMAN	FHOD1	8.6106	2.93438	2.02617	2.27761
sp|O60238|BNI3L_HUMAN	BNI3L_HUMAN	BNIP3L	0	0	2.02523	2.05004
sp|Q15042|RB3GP_HUMAN	RB3GP_HUMAN	RAB3GAP1	17.4811	4.18104	2.01042	4.43041
sp|P29597|TYK2_HUMAN	TYK2_HUMAN	TYK2	14.0348	3.74631	1.97724	3.81966
sp|Q6ZNB6|NFXL1_HUMAN	NFXL1_HUMAN	NFXL1	2.19443	1.48136	1.96451	2.19975
sp|Q96PY6|NEK1_HUMAN	NEK1_HUMAN	NEK1	5.91481	2.43204	1.9644	1.88446
sp|Q96A33|CCD47_HUMAN	CCD47_HUMAN	CCDC47	0.68313	0.826517	1.95155	-3.54536
sp|O95232|LC7L3_HUMAN	LC7L3_HUMAN	LUC7L3	2.02107	1.42164	1.94666	2.65248
sp|Q13615|MTMR3_HUMAN	MTMR3_HUMAN	MTMR3	853.694	29.218	1.94569	1.2546
sp|O60231|DHX16_HUMAN	DHX16_HUMAN	DHX16	45.6247	6.75461	1.94396	2.06266
sp|Q9UGP4|LIMD1_HUMAN	LIMD1_HUMAN	LIMD1	1.54369	1.24245	1.92355	2.14093
sp|Q8NAN2|MIGA1_HUMAN	MIGA1_HUMAN	MIGA1	7.36398	2.71367	1.9061	4.67547
sp|O00750|P3C2B_HUMAN	P3C2B_HUMAN	PIK3C2B	80.5693	8.97604	1.88764	2.44797
sp|Q96AG4|LRC59_HUMAN	LRC59_HUMAN	LRRC59	0.591608	0.769161	1.87697	-2.27565
sp|Q6NSJ2|PHLB3_HUMAN	PHLB3_HUMAN	PHLDB3	21.7718	4.66603	1.86386	1.8143
sp|P83881|RL36A_HUMAN	RL36A_HUMAN	RPL36A	4.79985	2.19086	1.85436	1.31831
sp|Q13427|PPIG_HUMAN	PPIG_HUMAN	PPIG	48.1158	6.93655	1.82705	3.37018
sp|Q7Z434|MAVS_HUMAN	MAVS_HUMAN	MAVS	6.7788	2.60361	1.81283	1.59986
sp|Q13523|PRP4B_HUMAN	PRP4B_HUMAN	PRPF4B	15.7902	3.97369	1.79801	3.12631
sp|Q99848|EBP2_HUMAN	EBP2_HUMAN	EBNA1BP2	0	0	1.77366	2.84962
sp|Q8IWJ2|GCC2_HUMAN	GCC2_HUMAN	GCC2	15.0285	3.87666	1.77102	4.84694
sp|Q16822|PCKGM_HUMAN	PCKGM_HUMAN	PCK2	0	0	1.74806	1.47397
sp|Q4KWH8|PLCH1_HUMAN	PLCH1_HUMAN	PLCH1	20.9612	4.57835	1.74678	1.63344
sp|Q9NT62|ATG3_HUMAN	ATG3_HUMAN	ATG3	0	0	1.74659	1.18215
sp|O75915|PRAF3_HUMAN	PRAF3_HUMAN	ARL6IP5	0	0	1.74215	-2.76338
sp|Q12983|BNIP3_HUMAN	BNIP3_HUMAN	BNIP3	1.97852	1.4066	1.74181	2.30095
sp|Q8IXI1|MIRO2_HUMAN	MIRO2_HUMAN	RHOT2	5.44263	2.33295	1.74097	3.04186
sp|Q8NDI1|EHBP1_HUMAN	EHBP1_HUMAN	EHBP1	7.22391	2.68773	1.70682	2.27981
sp|Q9BWH2|FUND2_HUMAN	FUND2_HUMAN	FUNDC2	1.83724	1.35545	1.68897	2.00326
sp|Q08378|GOGA3_HUMAN	GOGA3_HUMAN	GOLGA3	12.5087	3.53677	1.6801	2.48163
sp|Q9NVH0|EXD2_HUMAN	EXD2_HUMAN	EXD2	6.68587	2.58571	1.67183	1.42726
sp|P18031|PTN1_HUMAN	PTN1_HUMAN	PTPN1	2.96236	1.72115	1.67059	1.35601
sp|P05556|ITB1_HUMAN	ITB1_HUMAN	ITGB1	0.530212	0.728156	1.66695	-3.66105
sp|Q96A49|SYAP1_HUMAN	SYAP1_HUMAN	SYAP1	4.41701	2.10167	1.66693	2.59914
sp|Q8TD19|NEK9_HUMAN	NEK9_HUMAN	NEK9	35.5409	5.96162	1.66378	2.65305
sp|Q9HCL2|GPAT1_HUMAN	GPAT1_HUMAN	GPAM	8.28674	2.87867	1.65874	3.1509
sp|Q6ZUT1|CK057_HUMAN	CK057_HUMAN	NKAPD1	3.35001	1.8303	1.61948	2.02682
sp|Q15390|MTFR1_HUMAN	MTFR1_HUMAN	MTFR1	2.83905	1.68495	1.61083	2.80617
sp|Q92625|ANS1A_HUMAN	ANS1A_HUMAN	ANKS1A	17.5251	4.1863	1.60823	2.7105
sp|Q9UPV9|TRAK1_HUMAN	TRAK1_HUMAN	TRAK1	290.124	17.033	1.5885	1.66202
sp|Q9Y2W6|TDRKH_HUMAN	TDRKH_HUMAN	TDRKH	5.55713	2.35736	1.578	1.43938
sp|Q8TC07|TBC15_HUMAN	TBC15_HUMAN	TBC1D15	10.0909	3.17661	1.5616	3.37489
sp|Q6DN90|IQEC1_HUMAN	IQEC1_HUMAN	IQSEC1	4.1559	2.0386	1.55498	1.68238
sp|Q6P444|MTFR2_HUMAN	MTFR2_HUMAN	MTFR2	19.1403	4.37497	1.54507	2.32042
sp|P11021|GRP78_HUMAN	GRP78_HUMAN	HSPA5	0	0	1.54065	-3.14843
sp|Q2M2I8|AAK1_HUMAN	AAK1_HUMAN	AAK1	18.0145	4.24435	1.52992	2.18363
sp|Q8N9N7|LRC57_HUMAN	LRC57_HUMAN	LRRC57	10.5232	3.24395	1.52708	2.12219
sp|Q9H2M9|RBGPR_HUMAN	RBGPR_HUMAN	RAB3GAP2	11.9938	3.4632	1.52461	3.64866
sp|O60488|ACSL4_HUMAN	ACSL4_HUMAN	ACSL4	39.2427	6.2644	1.52335	2.05603
sp|O95716|RAB3D_HUMAN	RAB3D_HUMAN	RAB3D	0	0	1.52327	1.37903
sp|Q96CS3|FAF2_HUMAN	FAF2_HUMAN	FAF2	3.20275	1.78962	1.52277	2.5091
sp|Q58EX7|PKHG4_HUMAN	PKHG4_HUMAN	PLEKHG4	232.308	15.2416	1.50699	1.57498
sp|P50747|BPL1_HUMAN	BPL1_HUMAN	HLCS	8.07547	2.84174	1.49456	2.79299
sp|Q8WU79|SMAP2_HUMAN	SMAP2_HUMAN	SMAP2	0	0	1.48844	1.54126
sp|Q9UH62|ARMX3_HUMAN	ARMX3_HUMAN	ARMCX3	3.1509	1.77508	1.48605	3.54874
sp|P50416|CPT1A_HUMAN	CPT1A_HUMAN	CPT1A	5.04307	2.24568	1.48467	2.82892
sp|Q92997|DVL3_HUMAN	DVL3_HUMAN	DVL3	5.26309	2.29414	1.46607	3.15316
sp|O43426|SYNJ1_HUMAN	SYNJ1_HUMAN	SYNJ1	21.5865	4.64612	1.4586	3.45338
sp|O94830|DDHD2_HUMAN	DDHD2_HUMAN	DDHD2	110.794	10.5259	1.45712	1.6028
sp|Q9UPQ9|TNR6B_HUMAN	TNR6B_HUMAN	TNRC6B	7.82897	2.79803	1.4519	1.70718
sp|Q9NW68|BSDC1_HUMAN	BSDC1_HUMAN	BSDC1	0	0	1.44505	1.04483
sp|Q5THJ4|VP13D_HUMAN	VP13D_HUMAN	VPS13D	14.3161	3.78366	1.44232	4.37212
sp|P31948|STIP1_HUMAN	STIP1_HUMAN	STIP1	0	0	1.42891	-3.56347
sp|P05109|S10A8_HUMAN	S10A8_HUMAN	S100A8	0	0	1.4263	2.01169
sp|P13861|KAP2_HUMAN	KAP2_HUMAN	PRKAR2A	4.9561	2.22623	1.42128	2.84931
sp|P01876|IGHA1_HUMAN	IGHA1_HUMAN	IGHA1	6.0984	2.46949	1.41843	2.40616
sp|Q9NP73|ALG13_HUMAN	ALG13_HUMAN	ALG13	67.2967	8.20346	1.41599	1.69067
sp|Q5JTC6|AMER1_HUMAN	AMER1_HUMAN	AMER1	9.172	3.02853	1.41242	1.08177
sp|Q99961|SH3G1_HUMAN	SH3G1_HUMAN	SH3GL1	5.9209	2.43329	1.41191	2.10257
sp|P16333|NCK1_HUMAN	NCK1_HUMAN	NCK1	1.41371	1.189	1.41001	2.3223
sp|P16401|H15_HUMAN	H15_HUMAN	HIST1H1B	2.11807	1.45536	1.40247	2.61548
sp|P53804|TTC3_HUMAN	TTC3_HUMAN	TTC3	23.3986	4.83722	1.38994	2.94119
sp|Q9UQ35|SRRM2_HUMAN	SRRM2_HUMAN	SRRM2	9.90447	3.14714	1.38958	3.98722
sp|P42224|STAT1_HUMAN	STAT1_HUMAN	STAT1	12.7992	3.57759	1.346	1.63248
sp|Q8WVX9|FACR1_HUMAN	FACR1_HUMAN	FAR1	0	0	1.3373	1.47302
sp|P47914|RL29_HUMAN	RL29_HUMAN	RPL29	2.4144	1.55384	1.33659	1.40238
sp|Q92667|AKAP1_HUMAN	AKAP1_HUMAN	AKAP1	12.8309	3.58203	1.33622	1.36912
sp|Q9NRA8|4ET_HUMAN	4ET_HUMAN	EIF4ENIF1	6.24827	2.49965	1.33117	2.99067
sp|Q5VT66|MARC1_HUMAN	MARC1_HUMAN	MARC1	4.44297	2.10784	1.32232	2.46588
sp|Q8IYB3|SRRM1_HUMAN	SRRM1_HUMAN	SRRM1	6.14561	2.47903	1.3064	3.13174
sp|Q9UPU7|TBD2B_HUMAN	TBD2B_HUMAN	TBC1D2B	11.3301	3.36602	1.30572	1.87632
sp|Q9UPP1|PHF8_HUMAN	PHF8_HUMAN	PHF8	1.7146	1.30943	1.29567	2.09587
sp|Q15361|TTF1_HUMAN	TTF1_HUMAN	TTF1	8.59777	2.93219	1.28434	3.32731
sp|Q08188|TGM3_HUMAN	TGM3_HUMAN	TGM3	9.59542	3.09765	1.28103	1.11686
sp|Q9NQG6|MID51_HUMAN	MID51_HUMAN	MIEF1	4.28164	2.06921	1.27917	2.24203
sp|Q6FI81|CPIN1_HUMAN	CPIN1_HUMAN	CIAPIN1	1.06617	1.03255	1.27896	2.04401
sp|Q9NPL8|TIDC1_HUMAN	TIDC1_HUMAN	TIMMDC1	0	0	1.27657	1.56499
sp|O43933|PEX1_HUMAN	PEX1_HUMAN	PEX1	5.82776	2.41407	1.26301	3.0052
sp|Q99996|AKAP9_HUMAN	AKAP9_HUMAN	AKAP9	24.8726	4.98724	1.25655	3.73865
sp|P33981|TTK_HUMAN	TTK_HUMAN	TTK	4.9205	2.21822	1.25015	2.8491
sp|O14641|DVL2_HUMAN	DVL2_HUMAN	DVL2	4.39914	2.09741	1.24305	2.08354
sp|P51532|SMCA4_HUMAN	SMCA4_HUMAN	SMARCA4	50.2719	7.09027	1.23884	1.47184
sp|Q5HYI8|RABL3_HUMAN	RABL3_HUMAN	RABL3	0.57327	0.757146	1.23778	-2.76726
sp|Q13371|PHLP_HUMAN	PHLP_HUMAN	PDCL	2.27202	1.50732	1.23367	2.90492
sp|Q6ZSR9|YJ005_HUMAN	YJ005_HUMAN	FLJ45252	8.43037	2.90351	1.22356	1.53211
sp|Q8TEV9|SMCR8_HUMAN	SMCR8_HUMAN	SMCR8	6.27335	2.50467	1.22066	3.41577
sp|Q71RC2|LARP4_HUMAN	LARP4_HUMAN	LARP4	13.4015	3.6608	1.21891	2.38753
sp|Q9NZZ3|CHMP5_HUMAN	CHMP5_HUMAN	CHMP5	2.21912	1.48967	1.21528	1.98298
sp|Q96H55|MYO19_HUMAN	MYO19_HUMAN	MYO19	454.58	21.3209	1.21247	1.24573
sp|P46020|KPB1_HUMAN	KPB1_HUMAN	PHKA1	15.4627	3.93227	1.21172	1.10501
sp|Q7Z2W4|ZCCHV_HUMAN	ZCCHV_HUMAN	ZC3HAV1	9.73478	3.12006	1.20562	2.31846
sp|Q5JTV8|TOIP1_HUMAN	TOIP1_HUMAN	TOR1AIP1	1.12367	1.06003	1.18664	-1.89447
sp|Q08945|SSRP1_HUMAN	SSRP1_HUMAN	SSRP1	1.35081	1.16225	1.18649	1.51276
sp|Q9H9A6|LRC40_HUMAN	LRC40_HUMAN	LRRC40	0	0	1.18632	1.18035
sp|Q9H444|CHM4B_HUMAN	CHM4B_HUMAN	CHMP4B	3.61209	1.90055	1.18129	2.0129
sp|O15294|OGT1_HUMAN	OGT1_HUMAN	OGT	14.5501	3.81446	1.17435	2.09255
sp|Q9ULC3|RAB23_HUMAN	RAB23_HUMAN	RAB23	6.75051	2.59817	1.15665	1.24002
sp|O95478|NSA2_HUMAN	NSA2_HUMAN	NSA2	0	0	1.14863	1.71621
sp|Q15417|CNN3_HUMAN	CNN3_HUMAN	CNN3	2.2516	1.50053	1.14219	2.58321
sp|O75190|DNJB6_HUMAN	DNJB6_HUMAN	DNAJB6	5.26213	2.29393	1.1418	1.86165
sp|Q5T8D3|ACBD5_HUMAN	ACBD5_HUMAN	ACBD5	7.13921	2.67193	1.1386	2.42349
sp|Q6P3W7|SCYL2_HUMAN	SCYL2_HUMAN	SCYL2	5.05619	2.2486	1.13473	2.88244
sp|P40763|STAT3_HUMAN	STAT3_HUMAN	STAT3	40.3149	6.3494	1.13244	2.1099
sp|Q6PKG0|LARP1_HUMAN	LARP1_HUMAN	LARP1	5.8607	2.42089	1.12805	3.22193
sp|Q07820|MCL1_HUMAN	MCL1_HUMAN	MCL1	1.8655	1.36583	1.12662	1.85855
sp|P08195|4F2_HUMAN	4F2_HUMAN	SLC3A2	4.38491	2.09402	1.12639	-1.26595
sp|Q5JTW2|CEP78_HUMAN	CEP78_HUMAN	CEP78	8.81009	2.96818	1.12562	2.73665
sp|Q8N6T3|ARFG1_HUMAN	ARFG1_HUMAN	ARFGAP1	1.84147	1.35701	1.11745	2.22938
sp|E9PAV3|NACAM_HUMAN;sp|Q13765|NACA_HUMAN	NACAM_HUMAN	NACA	0	0	1.11684	-2.75419
sp|P48651|PTSS1_HUMAN	PTSS1_HUMAN	PTDSS1	4.2461	2.06061	1.1164	1.94266
sp|Q9Y6M5|ZNT1_HUMAN	ZNT1_HUMAN	SLC30A1	0	0	1.1135	-1.5788
sp|Q5H9R7|PP6R3_HUMAN	PP6R3_HUMAN	PPP6R3	4.2978	2.07311	1.10952	1.53032
sp|Q8N0X7|SPG20_HUMAN	SPG20_HUMAN	SPART	4.67365	2.16186	1.1071	2.30039
sp|Q5SY16|NOL9_HUMAN	NOL9_HUMAN	NOL9	4.01492	2.00373	1.10151	1.29006
sp|Q15003|CND2_HUMAN	CND2_HUMAN	NCAPH	4.426	2.10381	1.08829	1.24168
sp|B2RTY4|MYO9A_HUMAN	MYO9A_HUMAN	MYO9A	15.8116	3.97638	1.08581	2.08039
sp|Q66PJ3|AR6P4_HUMAN	AR6P4_HUMAN	ARL6IP4	8.77146	2.96167	1.08435	2.50507
sp|P08240|SRPRA_HUMAN	SRPRA_HUMAN	SRPRA	1.34406	1.15934	1.08233	-2.53887
sp|Q2TBE0|C19L2_HUMAN	C19L2_HUMAN	CWF19L2	23.076	4.80375	1.0726	1.1231
sp|Q969Z3|MARC2_HUMAN	MARC2_HUMAN	MARC2	2.49989	1.5811	1.06561	1.64641
sp|Q8TEU7|RPGF6_HUMAN	RPGF6_HUMAN	RAPGEF6	8.66839	2.94421	1.0644	2.69981
sp|P10412|H14_HUMAN	H14_HUMAN	HIST1H1E	9.46425	3.0764	1.06298	1.45746
sp|Q02224|CENPE_HUMAN	CENPE_HUMAN	CENPE	1.74618	1.32143	1.05909	1.62311
sp|Q96F07|CYFP2_HUMAN	CYFP2_HUMAN	CYFIP2	0	0	1.05483	-0.741038
sp|P56589|PEX3_HUMAN	PEX3_HUMAN	PEX3	1.17219	1.08268	1.05268	2.00443
sp|P62701|RS4X_HUMAN	RS4X_HUMAN	RPS4X	2.49204	1.57862	1.052	-1.2259
sp|Q9NU22|MDN1_HUMAN	MDN1_HUMAN	MDN1	11.0353	3.32194	1.05194	3.00186
sp|Q96C19|EFHD2_HUMAN	EFHD2_HUMAN	EFHD2	2.22563	1.49185	1.04578	2.22847
sp|P0DMV9|HS71B_HUMAN;sp|P0DMV8|HS71A_HUMAN	HS71B_HUMAN	HSPA1B	0	0	1.04309	-1.54301
sp|P62861|RS30_HUMAN	RS30_HUMAN	FAU	5.05111	2.24747	1.04171	1.16028
sp|Q9ULE6|PALD_HUMAN	PALD_HUMAN	PALD1	6.29607	2.5092	1.04166	2.62994
sp|Q92540|SMG7_HUMAN	SMG7_HUMAN	SMG7	11.8359	3.44033	1.03748	2.07084
sp|Q92574|TSC1_HUMAN	TSC1_HUMAN	TSC1	12.6383	3.55503	1.03016	1.78517
sp|Q15758|AAAT_HUMAN	AAAT_HUMAN	SLC1A5	2.33688	1.52869	1.02625	-1.5996
sp|Q15643|TRIPB_HUMAN	TRIPB_HUMAN	TRIP11	2.8974	1.70218	1.02498	-3.23549
sp|Q96JB2|COG3_HUMAN	COG3_HUMAN	COG3	0	0	1.01489	2.58971
sp|A1X283|SPD2B_HUMAN	SPD2B_HUMAN	SH3PXD2B	2.41016	1.55247	1.01381	1.85958
sp|Q9NS69|TOM22_HUMAN	TOM22_HUMAN	TOMM22	7.11648	2.66767	1.01172	2.09116
sp|P30414|NKTR_HUMAN	NKTR_HUMAN	NKTR	203.644	14.2704	1.01139	1.68575
sp|P35611|ADDA_HUMAN	ADDA_HUMAN	ADD1	0	0	1.01007	-2.33972
sp|O14966|RAB7L_HUMAN	RAB7L_HUMAN	RAB29	2.93532	1.71328	0.998865	1.78146
sp|Q8N2F6|ARM10_HUMAN	ARM10_HUMAN	ARMC10	2.07678	1.4411	0.992725	2.15821
sp|Q05655|KPCD_HUMAN	KPCD_HUMAN	PRKCD	1.86926	1.36721	0.988867	1.57237
sp|Q14145|KEAP1_HUMAN	KEAP1_HUMAN	KEAP1	0	0	0.986176	1.26637
sp|Q99567|NUP88_HUMAN	NUP88_HUMAN	NUP88	0	0	0.985671	1.23285
sp|Q8WUX9|CHMP7_HUMAN	CHMP7_HUMAN	CHMP7	2.09353	1.4469	0.982117	1.62098
sp|Q14247|SRC8_HUMAN	SRC8_HUMAN	CTTN	5.4002	2.32383	0.979874	1.94028
sp|Q14318|FKBP8_HUMAN	FKBP8_HUMAN	FKBP8	4.06176	2.01538	0.976613	1.49498
sp|Q9BZF1|OSBL8_HUMAN	OSBL8_HUMAN	OSBPL8	0.949223	0.974281	0.974952	-1.54503
sp|O15042|SR140_HUMAN	SR140_HUMAN	U2SURP	34.0043	5.83132	0.97212	2.06002
sp|Q71UM5|RS27L_HUMAN	RS27L_HUMAN	RPS27L	3.22285	1.79523	0.969918	2.97801
sp|Q9Y3L5|RAP2C_HUMAN	RAP2C_HUMAN	RAP2C	0	0	0.969049	1.82939
sp|Q8NDH2|CC168_HUMAN	CC168_HUMAN	CCDC168	0	0	0.965811	1.61752
sp|Q8WWM7|ATX2L_HUMAN	ATX2L_HUMAN	ATXN2L	4.8972	2.21296	0.964419	2.17194
sp|A2VDJ0|T131L_HUMAN	T131L_HUMAN	TMEM131L	0	0	0.945713	-0.831685
sp|P14923|PLAK_HUMAN	PLAK_HUMAN	JUP	4.10613	2.02636	0.944387	1.657
sp|P62913|RL11_HUMAN	RL11_HUMAN	RPL11	0.986013	0.992982	0.944372	-1.37795
sp|P17987|TCPA_HUMAN	TCPA_HUMAN	TCP1	2.29334	1.51438	0.944296	-2.42596
sp|Q9NZ45|CISD1_HUMAN	CISD1_HUMAN	CISD1	1.86197	1.36454	0.93399	1.42824
sp|Q96G28|CFA36_HUMAN	CFA36_HUMAN	CFAP36	0	0	0.930804	-0.802603
sp|O75410|TACC1_HUMAN	TACC1_HUMAN	TACC1	5.59126	2.36458	0.922172	2.97344
sp|O75381|PEX14_HUMAN	PEX14_HUMAN	PEX14	4.57667	2.13931	0.921093	2.17337
sp|Q8IYU8|MICU2_HUMAN	MICU2_HUMAN	MICU2	0	0	0.92061	1.63022
sp|O00429|DNM1L_HUMAN	DNM1L_HUMAN	DNM1L	9.62551	3.1025	0.918446	1.34665
sp|O00213|APBB1_HUMAN	APBB1_HUMAN	APBB1	4.53216	2.12889	0.903965	2.10415
sp|Q9ULH7|MKL2_HUMAN	MKL2_HUMAN	MRTFB	5.27542	2.29683	0.901765	2.3598
sp|P25054|APC_HUMAN	APC_HUMAN	APC	0	0	0.897566	1.00803
sp|P11387|TOP1_HUMAN	TOP1_HUMAN	TOP1	3.96776	1.99192	0.895023	2.1196
sp|Q5SQN1|SNP47_HUMAN	SNP47_HUMAN	SNAP47	7.61367	2.75929	0.89278	1.85842
sp|P98170|XIAP_HUMAN	XIAP_HUMAN	XIAP	2.50191	1.58174	0.892501	1.23941
sp|Q9NZC7|WWOX_HUMAN	WWOX_HUMAN	WWOX	2.33775	1.52897	0.890717	1.73458
sp|P43307|SSRA_HUMAN	SSRA_HUMAN	SSR1	0	0	0.868601	-2.33762
sp|Q9UBM7|DHCR7_HUMAN	DHCR7_HUMAN	DHCR7	0	0	0.867462	-2.03967
sp|Q9BPX6|MICU1_HUMAN	MICU1_HUMAN	MICU1	1.83462	1.35448	0.866871	1.47095
sp|Q99439|CNN2_HUMAN	CNN2_HUMAN	CNN2	0	0	0.866022	1.46608
sp|P02786|TFR1_HUMAN	TFR1_HUMAN	TFRC	0	0	0.865191	-1.83849
sp|O00443|P3C2A_HUMAN	P3C2A_HUMAN	PIK3C2A	23.3896	4.83628	0.863798	2.53843
sp|Q9H4A3|WNK1_HUMAN	WNK1_HUMAN	WNK1	25.4015	5.03999	0.859151	1.46462
sp|Q9H3N1|TMX1_HUMAN	TMX1_HUMAN	TMX1	0	0	0.854512	-2.51031
sp|Q5TC12|ATPF1_HUMAN	ATPF1_HUMAN	ATPAF1	2.22742	1.49245	0.849299	1.91943
sp|P28288|ABCD3_HUMAN	ABCD3_HUMAN	ABCD3	10.4482	3.23237	0.845016	0.832473
sp|P60468|SC61B_HUMAN	SC61B_HUMAN	SEC61B	0	0	0.844256	-1.9991
sp|P22392|NDKB_HUMAN;sp|O60361|NDK8_HUMAN	NDKB_HUMAN	NME2	2.51776	1.58675	0.839509	1.91134
sp|Q9Y388|RBMX2_HUMAN	RBMX2_HUMAN	RBMX2	2.78578	1.66907	0.83814	1.69026
sp|P52789|HXK2_HUMAN	HXK2_HUMAN	HK2	9.0102	3.0017	0.834413	2.54976
sp|Q9Y383|LC7L2_HUMAN	LC7L2_HUMAN	LUC7L2	6.90174	2.62712	0.834141	2.32901
sp|Q9H8Y8|GORS2_HUMAN	GORS2_HUMAN	GORASP2	0	0	0.826749	-2.02436
sp|Q9Y3D7|TIM16_HUMAN	TIM16_HUMAN	PAM16	0	0	0.822241	0.825692
sp|Q6P996|PDXD1_HUMAN	PDXD1_HUMAN	PDXDC1	12.3471	3.51384	0.817801	1.90707
sp|P23458|JAK1_HUMAN	JAK1_HUMAN	JAK1	5.60389	2.36725	0.81628	1.77873
sp|Q9UHQ9|NB5R1_HUMAN	NB5R1_HUMAN	CYB5R1	2.28633	1.51206	0.813283	1.94812
sp|Q9BXK5|B2L13_HUMAN	B2L13_HUMAN	BCL2L13	5.56732	2.35952	0.812088	1.28717
sp|Q96P47|AGAP3_HUMAN	AGAP3_HUMAN	AGAP3	3.85028	1.96221	0.807373	1.62796
sp|Q68DQ2|CRBG3_HUMAN	CRBG3_HUMAN	CRYBG3	16.8814	4.10869	0.805297	2.77062
sp|O15063|K0355_HUMAN	K0355_HUMAN	KIAA0355	0	0	0.805008	3.50678
sp|Q9H7C9|AAMDC_HUMAN	AAMDC_HUMAN	AAMDC	2.27197	1.5073	0.803246	1.56008
sp|P16403|H12_HUMAN	H12_HUMAN	HIST1H1C	0	0	0.802037	2.27284
sp|Q5HYI7|MTX3_HUMAN	MTX3_HUMAN	MTX3	2.37778	1.542	0.799628	1.78617
sp|Q14980|NUMA1_HUMAN	NUMA1_HUMAN	NUMA1	1.42546	1.19392	0.789348	-2.44455
sp|Q5SW79|CE170_HUMAN	CE170_HUMAN	CEP170	6.17621	2.4852	0.786162	2.65157
sp|P52292|IMA1_HUMAN	IMA1_HUMAN	KPNA2	1.96028	1.4001	0.784631	-1.45955
sp|O14976|GAK_HUMAN	GAK_HUMAN	GAK	9.46948	3.07725	0.781681	1.83693
sp|Q08AD1|CAMP2_HUMAN	CAMP2_HUMAN	CAMSAP2	0	0	0.780935	0.92366
sp|Q9UDT6|CLIP2_HUMAN	CLIP2_HUMAN	#N/A	#N/A	#N/A	0.779215	1.73131
sp|Q96L93|KI16B_HUMAN	KI16B_HUMAN	KIF16B	100.826	10.0412	0.778156	0.863203
sp|Q99570|PI3R4_HUMAN	PI3R4_HUMAN	PIK3R4	2.57556	1.60485	0.77203	-0.974164
sp|Q5VYS8|TUT7_HUMAN	TUT7_HUMAN	TUT7	0	0	0.771184	0.806539
sp|Q58FF8|H90B2_HUMAN	H90B2_HUMAN	#N/A	#N/A	#N/A	0.771084	-1.82977
sp|Q8WVS4|WDR60_HUMAN	WDR60_HUMAN	WDR60	3.86239	1.9653	0.77014	2.07119
sp|P52594|AGFG1_HUMAN	AGFG1_HUMAN	AGFG1	0	0	0.769636	1.39053
sp|Q9H2G2|SLK_HUMAN	SLK_HUMAN	SLK	5.39696	2.32314	0.767997	2.34984
sp|Q9Y450|HBS1L_HUMAN	HBS1L_HUMAN	HBS1L	6.11123	2.47209	0.76048	1.72976
sp|P63244|RACK1_HUMAN	RACK1_HUMAN	RACK1	0.68611	0.828317	0.759317	-1.95034
sp|O00151|PDLI1_HUMAN	PDLI1_HUMAN	PDLIM1	1.59593	1.2633	0.758475	1.6847
sp|Q99442|SEC62_HUMAN	SEC62_HUMAN	SEC62	0	0	0.757599	-2.37704
sp|Q8IWC1|MA7D3_HUMAN	MA7D3_HUMAN	MAP7D3	5.02217	2.24102	0.757027	1.95006
sp|P62937|PPIA_HUMAN	PPIA_HUMAN	PPIA	0	0	0.756566	-1.59612
sp|Q9Y4P8|WIPI2_HUMAN	WIPI2_HUMAN	WIPI2	3.95248	1.98808	0.752161	1.91772
sp|P42167|LAP2B_HUMAN	LAP2B_HUMAN	TMPO	3.08553	1.75657	0.750567	-1.05008
sp|Q9Y3T9|NOC2L_HUMAN	NOC2L_HUMAN	NOC2L	0	0	0.747261	-1.32245
sp|Q02952|AKA12_HUMAN	AKA12_HUMAN	AKAP12	5.27589	2.29693	0.744913	2.3605
sp|P46821|MAP1B_HUMAN	MAP1B_HUMAN	MAP1B	7.00017	2.64578	0.744586	2.74708
sp|Q9Y4E8|UBP15_HUMAN	UBP15_HUMAN	USP15	5.49157	2.34341	0.744508	2.40362
sp|Q6UB99|ANR11_HUMAN	ANR11_HUMAN	ANKRD11	10.5884	3.25398	0.742933	2.50817
sp|P07305|H10_HUMAN	H10_HUMAN	H1F0	4.48539	2.11787	0.742736	2.10538
sp|P16949|STMN1_HUMAN	STMN1_HUMAN	STMN1	1.10755	1.0524	0.742364	1.5473
sp|P11274|BCR_HUMAN	BCR_HUMAN	BCR	15.4896	3.93568	0.742281	2.12713
sp|Q96RL7|VP13A_HUMAN	VP13A_HUMAN	VPS13A	10.72	3.27414	0.741696	2.4106
sp|Q96N67|DOCK7_HUMAN	DOCK7_HUMAN	DOCK7	0	0	0.738615	-3.13635
sp|Q9Y3P9|RBGP1_HUMAN	RBGP1_HUMAN	RABGAP1	0	0	0.735776	-1.53686
sp|Q13162|PRDX4_HUMAN	PRDX4_HUMAN	PRDX4	0	0	0.734704	1.2799
sp|Q9UBP9|GULP1_HUMAN	GULP1_HUMAN	GULP1	1.98007	1.40715	0.733991	1.53936
sp|O95347|SMC2_HUMAN	SMC2_HUMAN	SMC2	4.30779	2.07552	0.733561	1.22909
sp|Q9NWT8|AKIP_HUMAN	AKIP_HUMAN	AURKAIP1	0	0	0.73115	2.15516
sp|P07355|ANXA2_HUMAN;sp|A6NMY6|AXA2L_HUMAN	ANXA2_HUMAN	ANXA2	4.81905	2.19523	0.729834	1.48529
sp|P53367|ARFP1_HUMAN	ARFP1_HUMAN	ARFIP1	0	0	0.729536	-1.24194
sp|Q9UL54|TAOK2_HUMAN	TAOK2_HUMAN	TAOK2	5.11594	2.26185	0.72867	2.02892
sp|P78344|IF4G2_HUMAN	IF4G2_HUMAN	EIF4G2	5.03182	2.24317	0.728115	2.08646
sp|P11717|MPRI_HUMAN	MPRI_HUMAN	IGF2R	2.21807	1.48932	0.72638	-2.08407
sp|Q14684|RRP1B_HUMAN	RRP1B_HUMAN	RRP1B	6.43033	2.53581	0.725425	0.946321
sp|O95721|SNP29_HUMAN	SNP29_HUMAN	SNAP29	3.03651	1.74256	0.72057	1.57547
sp|Q8IVF2|AHNK2_HUMAN	AHNK2_HUMAN	AHNAK2	5.04405	2.2459	0.719191	2.61486
sp|P47712|PA24A_HUMAN	PA24A_HUMAN	PLA2G4A	8.15593	2.85586	0.718979	1.48938
sp|P24723|KPCL_HUMAN	KPCL_HUMAN	PRKCH	0	0	0.718517	0.723459
sp|P17066|HSP76_HUMAN	HSP76_HUMAN	HSPA6	0	0	0.718439	-1.22761
sp|P49815|TSC2_HUMAN	TSC2_HUMAN	TSC2	5.09725	2.25771	0.716759	1.13722
sp|P49207|RL34_HUMAN	RL34_HUMAN	RPL34	1.87823	1.37049	0.714827	0.932847
sp|P05165|PCCA_HUMAN	PCCA_HUMAN	PCCA	18.9994	4.35883	0.712455	2.78333
sp|P32119|PRDX2_HUMAN	PRDX2_HUMAN	PRDX2	0	0	0.711548	0.787134
sp|P54136|SYRC_HUMAN	SYRC_HUMAN	RARS	20.5119	4.52901	0.707824	1.17623
sp|Q8IY17|PLPL6_HUMAN	PLPL6_HUMAN	PNPLA6	6.986	2.6431	0.707759	2.22446
sp|Q9UJU6|DBNL_HUMAN	DBNL_HUMAN	DBNL	7.11571	2.66753	0.706016	0.868208
sp|Q14677|EPN4_HUMAN	EPN4_HUMAN	CLINT1	3.60128	1.8977	0.696547	1.90919
sp|Q92522|H1X_HUMAN	H1X_HUMAN	H1FX	3.3699	1.83573	0.692912	1.89846
sp|P50479|PDLI4_HUMAN	PDLI4_HUMAN	PDLIM4	2.73209	1.6529	0.692651	1.44601
sp|Q8WY36|BBX_HUMAN	BBX_HUMAN	BBX	4.23117	2.05698	0.690663	2.02306
sp|P35658|NU214_HUMAN	NU214_HUMAN	NUP214	6.67942	2.58446	0.688982	1.59366
sp|P15924|DESP_HUMAN	DESP_HUMAN	DSP	14.5623	3.81606	0.68622	2.1758
sp|E9PRG8|CK098_HUMAN	CK098_HUMAN	C11orf98	0.938977	0.969008	0.683055	1.55284
sp|Q9BRX8|F213A_HUMAN	F213A_HUMAN	FAM213A	2.71395	1.64741	0.681639	0.795467
sp|O14640|DVL1_HUMAN;sp|P54792|DVLP1_HUMAN	DVL1_HUMAN	DVL1	13.7778	3.71185	0.676735	1.46506
sp|Q6GYQ0|RGPA1_HUMAN	RGPA1_HUMAN	RALGAPA1	2.31911	1.52286	0.675414	1.16585
sp|Q70E73|RAPH1_HUMAN	RAPH1_HUMAN	RAPH1	3.58172	1.89254	0.67291	1.58401
sp|O75691|UTP20_HUMAN	UTP20_HUMAN	UTP20	5.23116	2.28717	0.666679	-1.90169
sp|Q96MW1|CCD43_HUMAN	CCD43_HUMAN	CCDC43	1.90379	1.37978	0.665509	1.67967
sp|Q9UL25|RAB21_HUMAN	RAB21_HUMAN	RAB21	0	0	0.663149	1.12091
sp|Q8TB36|GDAP1_HUMAN	GDAP1_HUMAN	GDAP1	0	0	0.661929	1.08476
sp|Q27J81|INF2_HUMAN	INF2_HUMAN	INF2	0	0	0.659265	-0.760325
sp|O14617|AP3D1_HUMAN	AP3D1_HUMAN	AP3D1	7.55432	2.74851	0.654682	0.760408
sp|Q86UE4|LYRIC_HUMAN	LYRIC_HUMAN	MTDH	1.94177	1.39347	0.652464	-1.64802
sp|O14531|DPYL4_HUMAN	DPYL4_HUMAN	DPYSL4	5.12291	2.26338	0.651033	0.996146
sp|P30876|RPB2_HUMAN	RPB2_HUMAN	POLR2B	11.809	3.43643	0.647604	1.91133
sp|P68431|H31_HUMAN;sp|Q71DI3|H32_HUMAN;sp|Q16695|H31T_HUMAN;sp|P84243|H33_HUMAN;sp|Q6NXT2|H3C_HUMAN	H31_HUMAN	HIST1H3A	0	0	0.64676	1.81234
sp|Q9UPW5|CBPC1_HUMAN	CBPC1_HUMAN	AGTPBP1	5.73397	2.39457	0.645061	1.48078
sp|O95373|IPO7_HUMAN	IPO7_HUMAN	IPO7	0.867212	0.931242	0.644929	-2.01361
sp|Q92878|RAD50_HUMAN	RAD50_HUMAN	RAD50	4.3717	2.09086	0.643433	1.9007
sp|Q14160|SCRIB_HUMAN	SCRIB_HUMAN	SCRIB	1.14825	1.07156	0.64237	-1.99152
sp|Q15208|STK38_HUMAN	STK38_HUMAN	STK38	12.8747	3.58813	0.642278	1.47105
sp|Q9UJF2|NGAP_HUMAN	NGAP_HUMAN	RASAL2	4.55194	2.13353	0.642083	1.94071
sp|P62266|RS23_HUMAN	RS23_HUMAN	RPS23	3.83293	1.95779	0.639444	-0.759472
sp|Q8IVF7|FMNL3_HUMAN	FMNL3_HUMAN	FMNL3	4.59231	2.14297	0.637571	1.94412
sp|P13804|ETFA_HUMAN	ETFA_HUMAN	ETFA	0	0	0.636454	-1.84353
sp|Q53H12|AGK_HUMAN	AGK_HUMAN	AGK	0	0	0.635941	-1.66586
sp|P15531|NDKA_HUMAN	NDKA_HUMAN	NME1	4.867	2.20613	0.631379	1.15484
sp|P00167|CYB5_HUMAN	CYB5_HUMAN	CYB5A	15.4627	3.93227	0.631362	0.921343
sp|Q9P0K7|RAI14_HUMAN	RAI14_HUMAN	RAI14	2.73248	1.65302	0.631131	-1.93301
sp|P62805|H4_HUMAN	H4_HUMAN	HIST1H4A	3.98885	1.99721	0.630748	1.65849
sp|O75534|CSDE1_HUMAN	CSDE1_HUMAN	CSDE1	4.90261	2.21418	0.630111	2.11335
sp|P62277|RS13_HUMAN	RS13_HUMAN	RPS13	0.800314	0.894603	0.630049	1.65523
sp|Q7Z478|DHX29_HUMAN	DHX29_HUMAN	DHX29	1.03882	1.01922	0.627988	1.87542
sp|P62979|RS27A_HUMAN;sp|P0CG47|UBB_HUMAN;sp|P0CG48|UBC_HUMAN	RS27A_HUMAN	RPS27A	3.65041	1.9106	0.626154	-0.464991
sp|Q02040|AK17A_HUMAN	AK17A_HUMAN	AKAP17A	5.61675	2.36997	0.626119	1.92259
sp|Q93045|STMN2_HUMAN	STMN2_HUMAN	STMN2	0	0	0.624264	1.35709
sp|Q9UDY2|ZO2_HUMAN	ZO2_HUMAN	TJP2	2.88529	1.69862	0.623607	0.78827
sp|Q8IZH2|XRN1_HUMAN	XRN1_HUMAN	XRN1	6.87747	2.62249	0.622615	2.27856
sp|Q9Y5V3|MAGD1_HUMAN	MAGD1_HUMAN	MAGED1	8.46815	2.91001	0.621972	0.895134
sp|P27816|MAP4_HUMAN	MAP4_HUMAN	MAP4	5.03755	2.24445	0.619516	2.00446
sp|Q9GZY8|MFF_HUMAN	MFF_HUMAN	MFF	2.19666	1.48212	0.617284	1.67846
sp|O96011|PX11B_HUMAN	PX11B_HUMAN	PEX11B	2.17322	1.47419	0.613886	1.3944
sp|Q9UNX4|WDR3_HUMAN	WDR3_HUMAN	WDR3	0	0	0.613058	-1.18523
sp|P18583|SON_HUMAN	SON_HUMAN	SON	6.39081	2.52801	0.612693	0.971474
sp|Q7Z6K5|ARPIN_HUMAN	ARPIN_HUMAN	ARPIN	1.84606	1.3587	0.612536	1.77027
sp|P61513|RL37A_HUMAN	RL37A_HUMAN	RPL37A	2.57683	1.60525	0.609644	1.17444
sp|P62820|RAB1A_HUMAN	RAB1A_HUMAN	RAB1A	1.20761	1.09892	0.608996	1.30243
sp|Q9UHK0|NUFP1_HUMAN	NUFP1_HUMAN	NUFIP1	4.02647	2.00661	0.608655	0.909553
sp|Q9ULM3|YETS2_HUMAN	YETS2_HUMAN	YEATS2	2.66416	1.63223	0.607823	-1.8051
sp|Q9BTX1|NDC1_HUMAN	NDC1_HUMAN	NDC1	0	0	0.60755	-1.99054
sp|P32121|ARRB2_HUMAN	ARRB2_HUMAN	ARRB2	1.19528	1.09329	0.607367	1.4873
sp|O75369|FLNB_HUMAN	FLNB_HUMAN	FLNB	7.15882	2.6756	0.605388	1.64727
sp|Q7LBC6|KDM3B_HUMAN	KDM3B_HUMAN	KDM3B	2.28525	1.5117	0.604771	0.982357
sp|Q9BR76|COR1B_HUMAN	COR1B_HUMAN	CORO1B	3.86139	1.96504	0.604665	1.30662
sp|Q13190|STX5_HUMAN	STX5_HUMAN	STX5	0.57327	0.757146	0.6042	-1.896
sp|Q9BU76|MMTA2_HUMAN	MMTA2_HUMAN	MMTAG2	2.27798	1.5093	0.602225	0.660368
sp|Q4VCS5|AMOT_HUMAN	AMOT_HUMAN	AMOT	6.91135	2.62894	0.60153	2.57023
sp|P30837|AL1B1_HUMAN	AL1B1_HUMAN	ALDH1B1	0	0	0.601144	0.700222
sp|Q9HCM4|E41L5_HUMAN	E41L5_HUMAN	EPB41L5	4.59501	2.1436	0.599749	1.50329
sp|Q14241|ELOA1_HUMAN	ELOA1_HUMAN	ELOA	9.9106	3.14811	0.596892	1.91769
sp|Q9UBC2|EP15R_HUMAN	EP15R_HUMAN	EPS15L1	5.03197	2.24321	0.596356	1.58748
sp|O15067|PUR4_HUMAN	PUR4_HUMAN	PFAS	29.5751	5.43829	0.593321	1.10237
sp|Q96RQ3|MCCA_HUMAN	MCCA_HUMAN	MCCC1	9.66741	3.10925	0.591359	1.57876
sp|P30101|PDIA3_HUMAN	PDIA3_HUMAN	PDIA3	0	0	0.590942	-0.672239
sp|P82094|TMF1_HUMAN	TMF1_HUMAN	TMF1	0.900363	0.948874	0.589647	-1.53658
sp|Q13613|MTMR1_HUMAN	MTMR1_HUMAN	MTMR1	0	0	0.589511	0.922824
sp|P11498|PYC_HUMAN	PYC_HUMAN	PC	18.6322	4.3165	0.588019	0.897855
sp|Q70CQ3|UBP30_HUMAN	UBP30_HUMAN	USP30	2.99225	1.72981	0.58685	1.48712
sp|Q9H3U1|UN45A_HUMAN	UN45A_HUMAN	UNC45A	5.54895	2.35562	0.584758	2.06298
sp|O75592|MYCB2_HUMAN	MYCB2_HUMAN	MYCBP2	21.3921	4.62516	0.582797	1.95557
sp|Q2NKX8|ERC6L_HUMAN	ERC6L_HUMAN	ERCC6L	11.0064	3.31759	0.581911	1.77832
sp|Q9UBF2|COPG2_HUMAN	COPG2_HUMAN	COPG2	4.36789	2.08995	0.581393	1.59221
sp|Q9HCD6|TANC2_HUMAN	TANC2_HUMAN	TANC2	15.2789	3.90882	0.580852	1.01242
sp|P49959|MRE11_HUMAN	MRE11_HUMAN	MRE11	5.54608	2.35501	0.580397	1.18167
sp|Q9Y3U8|RL36_HUMAN	RL36_HUMAN	RPL36	1.84774	1.35932	0.580091	1.19981
sp|O75152|ZC11A_HUMAN	ZC11A_HUMAN	ZC3H11A	1.71668	1.31022	0.57789	-1.49839
sp|Q8WXE0|CSKI2_HUMAN	CSKI2_HUMAN	CASKIN2	0	0	0.575777	-0.670115
sp|P38646|GRP75_HUMAN	GRP75_HUMAN	HSPA9	0	0	0.5697	-1.77101
sp|P62854|RS26_HUMAN;sp|Q5JNZ5|RS26L_HUMAN	RS26_HUMAN	RPS26	1.93855	1.39232	0.569423	0.618851
sp|Q99733|NP1L4_HUMAN	NP1L4_HUMAN	NAP1L4	0	0	0.562209	-1.26463
sp|Q8N2A8|PLD6_HUMAN	PLD6_HUMAN	PLD6	0	0	0.561332	1.16185
sp|Q9P031|TAP26_HUMAN	TAP26_HUMAN	CCDC59	1.09394	1.04592	0.559967	1.77839
sp|Q9NRY5|F1142_HUMAN	F1142_HUMAN	FAM114A2	7.75432	2.78466	0.559611	1.50842
sp|Q9UPQ3|AGAP1_HUMAN	AGAP1_HUMAN	AGAP1	5.42252	2.32863	0.55796	1.37149
sp|Q86SQ0|PHLB2_HUMAN	PHLB2_HUMAN	PHLDB2	5.19544	2.27935	0.55348	1.47887
sp|O94813|SLIT2_HUMAN	SLIT2_HUMAN	SLIT2	6.10749	2.47133	0.551422	1.64122
sp|Q96EY4|TMA16_HUMAN	TMA16_HUMAN	TMA16	2.59519	1.61096	0.551193	1.6774
sp|Q9HCK8|CHD8_HUMAN	CHD8_HUMAN	CHD8	2.81745	1.67853	0.549839	-2.37202
sp|P27824|CALX_HUMAN	CALX_HUMAN	CANX	0.726014	0.852065	0.547544	-1.61048
sp|Q6PCB5|RSBNL_HUMAN	RSBNL_HUMAN	RSBN1L	7.18781	2.68101	0.546159	1.36574
sp|P53597|SUCA_HUMAN	SUCA_HUMAN	SUCLG1	0	0	0.54549	0.870799
sp|Q86UP2|KTN1_HUMAN	KTN1_HUMAN	KTN1	5.23376	2.28774	0.544336	-0.950008
sp|Q9Y3F4|STRAP_HUMAN	STRAP_HUMAN	STRAP	0	0	0.542002	-1.0231
sp|P62917|RL8_HUMAN	RL8_HUMAN	RPL8	1.30409	1.14197	0.539239	1.4961
sp|Q96S99|PKHF1_HUMAN	PKHF1_HUMAN	PLEKHF1	0	0	0.535533	1.05965
sp|Q9NP64|NO40_HUMAN	NO40_HUMAN	ZCCHC17	1.99494	1.41242	0.534802	1.30046
sp|Q96EB1|ELP4_HUMAN	ELP4_HUMAN	ELP4	0	0	0.533447	0.869198
sp|P28340|DPOD1_HUMAN	DPOD1_HUMAN	POLD1	2.19079	1.48013	0.533271	0.944699
sp|Q8NF91|SYNE1_HUMAN	SYNE1_HUMAN	SYNE1	7.38676	2.71786	0.530925	1.65827
sp|Q6WCQ1|MPRIP_HUMAN	MPRIP_HUMAN	MPRIP	3.40455	1.84514	0.530833	0.863167
sp|Q5SVZ6|ZMYM1_HUMAN	ZMYM1_HUMAN	ZMYM1	6.91143	2.62896	0.528931	1.6608
sp|P60842|IF4A1_HUMAN	IF4A1_HUMAN	EIF4A1	0	0	0.528843	-1.39559
sp|P42695|CNDD3_HUMAN	CNDD3_HUMAN	NCAPD3	8.28748	2.8788	0.524803	0.931028
sp|P37802|TAGL2_HUMAN	TAGL2_HUMAN	TAGLN2	2.77176	1.66486	0.523377	0.917693
sp|Q9H6U6|BCAS3_HUMAN	BCAS3_HUMAN	BCAS3	33.8563	5.81862	0.522566	0.78688
sp|Q8WYP5|ELYS_HUMAN	ELYS_HUMAN	AHCTF1	0	0	0.521842	0.889861
sp|Q14139|UBE4A_HUMAN	UBE4A_HUMAN	UBE4A	0	0	0.519235	-1.26309
sp|Q9NYV4|CDK12_HUMAN	CDK12_HUMAN	CDK12	4.9775	2.23103	0.517863	1.02924
sp|Q86U38|NOP9_HUMAN	NOP9_HUMAN	NOP9	0	0	0.517147	0.588825
sp|P40616|ARL1_HUMAN	ARL1_HUMAN	ARL1	0	0	0.51561	1.05018
sp|Q5T3I0|GPTC4_HUMAN	GPTC4_HUMAN	GPATCH4	3.77557	1.94308	0.513438	1.23534
sp|P51617|IRAK1_HUMAN	IRAK1_HUMAN	IRAK1	4.47341	2.11504	0.512815	1.29077
sp|Q5JTH9|RRP12_HUMAN	RRP12_HUMAN	RRP12	9.48891	3.08041	0.512474	0.610298
sp|P10809|CH60_HUMAN	CH60_HUMAN	HSPD1	1.88916	1.37447	0.511183	-1.40072
sp|O00410|IPO5_HUMAN	IPO5_HUMAN	IPO5	6.95878	2.63795	0.510322	1.11248
sp|Q13283|G3BP1_HUMAN	G3BP1_HUMAN	G3BP1	0	0	0.504572	-0.84602
sp|Q02790|FKBP4_HUMAN	FKBP4_HUMAN	FKBP4	0	0	0.499832	-1.12909
sp|Q9BRS2|RIOK1_HUMAN	RIOK1_HUMAN	RIOK1	5.45865	2.33638	0.496658	0.913459
sp|O00400|ACATN_HUMAN	ACATN_HUMAN	SLC33A1	0	0	0.494228	-1.2373
sp|O75116|ROCK2_HUMAN	ROCK2_HUMAN	ROCK2	6.88121	2.62321	0.493374	1.18233
sp|O94826|TOM70_HUMAN	TOM70_HUMAN	TOMM70	4.20921	2.05164	0.492712	1.04996
sp|Q9Y490|TLN1_HUMAN	TLN1_HUMAN	TLN1	5.63928	2.37472	0.492348	-1.58805
sp|Q9UMY1|NOL7_HUMAN	NOL7_HUMAN	NOL7	0	0	0.491914	0.777372
sp|P40855|PEX19_HUMAN	PEX19_HUMAN	PEX19	0.985332	0.992639	0.488358	1.38442
sp|P61081|UBC12_HUMAN	UBC12_HUMAN	UBE2M	2.66481	1.63242	0.486355	1.12354
sp|O15235|RT12_HUMAN	RT12_HUMAN	MRPS12	2.65545	1.62955	0.485554	1.4372
sp|Q6P1L8|RM14_HUMAN	RM14_HUMAN	MRPL14	0	0	0.482638	0.616807
sp|Q9H2J7|S6A15_HUMAN	S6A15_HUMAN	SLC6A15	3.3431	1.82841	0.482636	-0.784658
sp|Q6Y7W6|GGYF2_HUMAN	GGYF2_HUMAN	GIGYF2	5.85251	2.4192	0.482622	1.33761
sp|O15498|YKT6_HUMAN	YKT6_HUMAN	YKT6	4.17805	2.04403	0.479408	0.550542
sp|Q5T6F2|UBAP2_HUMAN	UBAP2_HUMAN	UBAP2	3.66288	1.91386	0.479376	1.2722
sp|Q07812|BAX_HUMAN	BAX_HUMAN	BAX	2.46894	1.57129	0.478622	1.47125
sp|Q9UM54|MYO6_HUMAN	MYO6_HUMAN	MYO6	10.2686	3.20447	0.478593	1.21649
sp|Q9NX40|OCAD1_HUMAN	OCAD1_HUMAN	OCIAD1	2.27376	1.5079	0.477343	0.995775
sp|Q8TCG1|CIP2A_HUMAN	CIP2A_HUMAN	CIP2A	5.4641	2.33754	0.475684	1.39342
sp|Q96D09|GASP2_HUMAN	GASP2_HUMAN	GPRASP2	8.99145	2.99857	0.472096	1.03145
sp|Q15084|PDIA6_HUMAN	PDIA6_HUMAN	PDIA6	0	0	0.469561	0.606825
sp|Q9HCC0|MCCB_HUMAN	MCCB_HUMAN	MCCC2	2.23082	1.49359	0.468138	-0.805945
sp|P37198|NUP62_HUMAN	NUP62_HUMAN	#N/A	#N/A	#N/A	0.467657	-0.504304
sp|P49321|NASP_HUMAN	NASP_HUMAN	NASP	8.52486	2.91974	0.465887	1.43945
sp|O95433|AHSA1_HUMAN	AHSA1_HUMAN	AHSA1	1.25984	1.12242	0.46521	0.990102
sp|O94822|LTN1_HUMAN	LTN1_HUMAN	LTN1	4.99056	2.23396	0.465053	1.18291
sp|O75616|ERAL1_HUMAN	ERAL1_HUMAN	ERAL1	2.77485	1.66579	0.46027	0.795689
sp|P56192|SYMC_HUMAN	SYMC_HUMAN	MARS	3.66817	1.91525	0.459732	-0.889428
sp|Q9NR12|PDLI7_HUMAN	PDLI7_HUMAN	PDLIM7	0	0	0.459013	0.710014
sp|Q16891|MIC60_HUMAN	MIC60_HUMAN	IMMT	8.37138	2.89333	0.459001	1.21976
sp|P46779|RL28_HUMAN	RL28_HUMAN	RPL28	1.94287	1.39387	0.458881	0.652537
sp|P55011|S12A2_HUMAN	S12A2_HUMAN	SLC12A2	4.20526	2.05067	0.458668	-0.721635
sp|Q16650|TBR1_HUMAN	TBR1_HUMAN	TBR1	0	0	0.458386	0.752997
sp|Q15942|ZYX_HUMAN	ZYX_HUMAN	ZYX	2.10334	1.45029	0.458204	0.943809
sp|Q14739|LBR_HUMAN	LBR_HUMAN	LBR	3.34744	1.8296	0.457136	-1.11234
sp|Q13586|STIM1_HUMAN	STIM1_HUMAN	STIM1	2.38109	1.54308	0.456831	-1.50111
sp|P51648|AL3A2_HUMAN	AL3A2_HUMAN	ALDH3A2	3.7863	1.94584	0.456276	0.40971
sp|Q5VTE0|EF1A3_HUMAN;sp|P68104|EF1A1_HUMAN	EF1A3_HUMAN	EEF1A1P5	0	0	0.456112	-0.455191
sp|Q96JH7|VCIP1_HUMAN	VCIP1_HUMAN	VCPIP1	4.77818	2.1859	0.455046	1.8033
sp|Q8TBA6|GOGA5_HUMAN	GOGA5_HUMAN	GOLGA5	2.39344	1.54707	0.454683	-1.5324
sp|Q9UPN3|MACF1_HUMAN	MACF1_HUMAN	MACF1	10.055	3.17097	0.453719	1.68078
sp|O43399|TPD54_HUMAN	TPD54_HUMAN	TPD52L2	0	0	0.449819	0.679142
sp|Q14839|CHD4_HUMAN	CHD4_HUMAN	CHD4	2.91023	1.70594	0.449153	-1.55098
sp|Q9BZF3|OSBL6_HUMAN	OSBL6_HUMAN	OSBPL6	4.73697	2.17646	0.446507	1.3231
sp|Q8IUD2|RB6I2_HUMAN	RB6I2_HUMAN	ERC1	4.83193	2.19817	0.444384	1.52708
sp|Q8TDD1|DDX54_HUMAN	DDX54_HUMAN	DDX54	4.55094	2.13329	0.443039	1.8378
sp|O95219|SNX4_HUMAN	SNX4_HUMAN	SNX4	0	0	0.441315	0.517654
sp|P16152|CBR1_HUMAN	CBR1_HUMAN	CBR1	5.14964	2.26928	0.440755	1.45936
sp|Q07157|ZO1_HUMAN	ZO1_HUMAN	TJP1	0	0	0.439762	0.857484
sp|P35579|MYH9_HUMAN	MYH9_HUMAN	MYH9	7.61547	2.75961	0.439529	1.42188
sp|Q9UGP8|SEC63_HUMAN	SEC63_HUMAN	SEC63	0.916326	0.957249	0.435939	-1.34099
sp|Q9Y295|DRG1_HUMAN	DRG1_HUMAN	DRG1	0	0	0.434696	-0.476388
sp|Q9Y4W6|AFG32_HUMAN	AFG32_HUMAN	AFG3L2	4.85884	2.20428	0.431593	1.27411
sp|Q9NZ52|GGA3_HUMAN	GGA3_HUMAN	GGA3	1.48272	1.21767	0.423456	0.933354
sp|Q8WXH0|SYNE2_HUMAN	SYNE2_HUMAN	SYNE2	7.52083	2.74241	0.421682	2.00294
sp|Q96HS1|PGAM5_HUMAN	PGAM5_HUMAN	PGAM5	2.36318	1.53727	0.419768	0.844244
sp|P62249|RS16_HUMAN	RS16_HUMAN	RPS16	2.93387	1.71286	0.419665	-0.490051
sp|P61619|S61A1_HUMAN	S61A1_HUMAN	SEC61A1	1.18908	1.09045	0.419234	1.17352
sp|Q9H6T3|RPAP3_HUMAN	RPAP3_HUMAN	RPAP3	4.0141	2.00352	0.418605	-1.28655
sp|O75683|SURF6_HUMAN	SURF6_HUMAN	SURF6	2.54255	1.59454	0.416101	1.48239
sp|Q9NQC3|RTN4_HUMAN	RTN4_HUMAN	RTN4	0	0	0.411327	-1.46671
sp|Q14315|FLNC_HUMAN	FLNC_HUMAN	FLNC	16.2256	4.0281	0.410708	1.32616
sp|P25205|MCM3_HUMAN	MCM3_HUMAN	MCM3	2.71226	1.64689	0.410506	-1.03455
sp|Q13439|GOGA4_HUMAN	GOGA4_HUMAN	GOLGA4	3.96351	1.99086	0.40961	-1.99079
sp|Q14974|IMB1_HUMAN	IMB1_HUMAN	KPNB1	0	0	0.408939	-1.16034
sp|Q92575|UBXN4_HUMAN	UBXN4_HUMAN	UBXN4	3.85447	1.96328	0.408205	0.843448
sp|Q9H8G2|CAAP1_HUMAN	CAAP1_HUMAN	CAAP1	0	0	0.406115	0.845722
sp|Q5XPI4|RN123_HUMAN	RN123_HUMAN	RNF123	7.48877	2.73656	0.405504	0.87637
sp|O95819|M4K4_HUMAN	M4K4_HUMAN	MAP4K4	10.1537	3.18649	0.404789	1.29532
sp|Q9NSV4|DIAP3_HUMAN	DIAP3_HUMAN	DIAPH3	0	0	0.403993	-1.11084
sp|P42704|LPPRC_HUMAN	LPPRC_HUMAN	LRPPRC	7.18255	2.68003	0.402199	1.67238
sp|Q6XZF7|DNMBP_HUMAN	DNMBP_HUMAN	DNMBP	2.74667	1.65731	0.40032	0.521748
sp|Q9NNW5|WDR6_HUMAN	WDR6_HUMAN	WDR6	6.74199	2.59653	0.398356	1.07488
sp|Q15056|IF4H_HUMAN	IF4H_HUMAN	EIF4H	0	0	0.397336	1.11463
sp|Q9H5V9|CX056_HUMAN	CX056_HUMAN	CXorf56	0	0	0.39411	-1.25033
sp|Q9UIQ6|LCAP_HUMAN	LCAP_HUMAN	LNPEP	0	0	0.39078	-0.921305
sp|P62244|RS15A_HUMAN	RS15A_HUMAN	RPS15A	2.0729	1.43976	0.390326	1.21321
sp|Q00341|VIGLN_HUMAN	VIGLN_HUMAN	HDLBP	6.43949	2.53762	0.390097	1.54382
sp|O60502|OGA_HUMAN	OGA_HUMAN	OGA	17.3875	4.16983	0.38754	0.758961
sp|P19367|HXK1_HUMAN	HXK1_HUMAN	HK1	11.0501	3.32417	0.386294	1.08991
sp|P06733|ENOA_HUMAN	ENOA_HUMAN	ENO1	0.6742	0.821097	0.385265	1.06051
sp|P49006|MRP_HUMAN	MRP_HUMAN	MARCKSL1	0	0	0.385173	-0.696004
sp|Q7Z7G8|VP13B_HUMAN	VP13B_HUMAN	VPS13B	0	0	0.381377	-1.04142
sp|Q9Y5K6|CD2AP_HUMAN	CD2AP_HUMAN	CD2AP	3.31024	1.81941	0.378543	1.24682
sp|Q9Y2U8|MAN1_HUMAN	MAN1_HUMAN	LEMD3	0.877472	0.936735	0.377872	-1.14757
sp|P16615|AT2A2_HUMAN	AT2A2_HUMAN	ATP2A2	7.01128	2.64788	0.377504	1.24533
sp|Q9BXW9|FACD2_HUMAN	FACD2_HUMAN	FANCD2	5.64301	2.3755	0.377469	0.860275
sp|Q709C8|VP13C_HUMAN	VP13C_HUMAN	VPS13C	15.3696	3.92041	0.377296	1.57812
sp|Q5VV42|CDKAL_HUMAN	CDKAL_HUMAN	CDKAL1	1.28736	1.13462	0.376277	-1.01745
sp|O60566|BUB1B_HUMAN	BUB1B_HUMAN	BUB1B	3.98783	1.99696	0.375339	1.18202
sp|P00533|EGFR_HUMAN	EGFR_HUMAN	EGFR	0	0	0.375209	0.606363
sp|Q3ZCQ8|TIM50_HUMAN	TIM50_HUMAN	TIMM50	0.943067	0.971117	0.37354	-0.965048
sp|Q8NC51|PAIRB_HUMAN	PAIRB_HUMAN	SERBP1	0.574582	0.758012	0.373198	-1.19338
sp|P62750|RL23A_HUMAN	RL23A_HUMAN	RPL23A	3.13629	1.77096	0.371549	0.412429
sp|Q9Y2I7|FYV1_HUMAN	FYV1_HUMAN	PIKFYVE	82.3582	9.07514	0.371188	0.697292
sp|Q9GZR7|DDX24_HUMAN	DDX24_HUMAN	DDX24	6.31554	2.51307	0.369411	1.2707
sp|Q13492|PICAL_HUMAN	PICAL_HUMAN	PICALM	6.28997	2.50798	0.369403	0.761635
sp|Q9NZN5|ARHGC_HUMAN	ARHGC_HUMAN	ARHGEF12	2.11708	1.45502	0.368176	-0.892934
sp|P55884|EIF3B_HUMAN	EIF3B_HUMAN	EIF3B	0	0	0.366971	-0.41141
sp|O75400|PR40A_HUMAN	PR40A_HUMAN	PRPF40A	3.87408	1.96827	0.366713	1.19192
sp|Q9Y266|NUDC_HUMAN	NUDC_HUMAN	NUDC	1.74837	1.32226	0.365392	-0.680666
sp|P25705|ATPA_HUMAN	ATPA_HUMAN	ATP5F1A	1.14101	1.06818	0.365119	-1.05989
sp|P41250|GARS_HUMAN	GARS_HUMAN	GARS	0	0	0.364014	0.493209
sp|P30519|HMOX2_HUMAN	HMOX2_HUMAN	HMOX2	0	0	0.363576	-1.01503
sp|P12273|PIP_HUMAN	PIP_HUMAN	PIP	4.5482	2.13265	0.363537	0.9678
sp|Q8ND24|RN214_HUMAN	RN214_HUMAN	RNF214	3.57879	1.89177	0.363201	0.513065
sp|P84098|RL19_HUMAN	RL19_HUMAN	RPL19	2.55339	1.59793	0.361043	-0.384215
sp|O14980|XPO1_HUMAN	XPO1_HUMAN	XPO1	0	0	0.360867	-0.827526
sp|Q5C9Z4|NOM1_HUMAN	NOM1_HUMAN	NOM1	4.71289	2.17092	0.360685	0.853485
sp|P33991|MCM4_HUMAN	MCM4_HUMAN	MCM4	0	0	0.35919	0.419803
sp|Q9H3P7|GCP60_HUMAN	GCP60_HUMAN	ACBD3	2.38267	1.54359	0.358913	1.20353
sp|P46939|UTRO_HUMAN	UTRO_HUMAN	UTRN	3.99286	1.99821	0.356577	-1.62571
sp|Q9Y6B6|SAR1B_HUMAN	SAR1B_HUMAN	SAR1B	0	0	0.356074	0.755838
sp|O14647|CHD2_HUMAN	CHD2_HUMAN	CHD2	0	0	0.356052	0.620832
sp|P46778|RL21_HUMAN	RL21_HUMAN	RPL21	3.24638	1.80177	0.353294	1.01458
sp|Q8TCJ2|STT3B_HUMAN	STT3B_HUMAN	STT3B	1.69476	1.30183	0.353165	0.801927
sp|Q99623|PHB2_HUMAN	PHB2_HUMAN	PHB2	2.04125	1.42872	0.349423	-1.21126
sp|P06748|NPM_HUMAN	NPM_HUMAN	NPM1	0	0	0.349228	-1.05352
sp|Q9H1K0|RBNS5_HUMAN	RBNS5_HUMAN	RBSN	2.03686	1.42718	0.348384	0.585513
sp|P07814|SYEP_HUMAN	SYEP_HUMAN	EPRS	5.50167	2.34556	0.347974	1.15378
sp|O43143|DHX15_HUMAN	DHX15_HUMAN	DHX15	7.66333	2.76827	0.347506	1.02019
sp|P18206|VINC_HUMAN	VINC_HUMAN	VCL	12.2642	3.50202	0.34564	1.30862
sp|Q9Y6R0|NUMBL_HUMAN	NUMBL_HUMAN	NUMBL	0	0	0.345613	-0.847049
sp|Q5UIP0|RIF1_HUMAN	RIF1_HUMAN	RIF1	1.25335	1.11953	0.345584	-0.677596
sp|P21333|FLNA_HUMAN	FLNA_HUMAN	FLNA	14.2136	3.77009	0.344978	-0.902588
sp|P23284|PPIB_HUMAN	PPIB_HUMAN	PPIB	0	0	0.342405	-0.716317
sp|P55209|NP1L1_HUMAN	NP1L1_HUMAN	NAP1L1	0	0	0.340964	-0.959837
sp|Q14152|EIF3A_HUMAN	EIF3A_HUMAN	EIF3A	0	0	0.340621	0.60357
sp|Q92900|RENT1_HUMAN	RENT1_HUMAN	UPF1	1.32325	1.15033	0.339652	-0.917637
sp|Q9NP61|ARFG3_HUMAN	ARFG3_HUMAN	ARFGAP3	0	0	0.33914	0.768256
sp|P04843|RPN1_HUMAN	RPN1_HUMAN	RPN1	1.1875	1.08973	0.33726	-0.993629
sp|O60343|TBCD4_HUMAN	TBCD4_HUMAN	TBC1D4	0.998865	0.999432	0.337219	-0.826562
sp|Q9UID3|VPS51_HUMAN	VPS51_HUMAN	VPS51	0	0	0.334903	0.399095
sp|P22102|PUR2_HUMAN	PUR2_HUMAN	GART	0	0	0.330384	-0.788568
sp|Q93008|USP9X_HUMAN	USP9X_HUMAN	USP9X	0	0	0.328	0.734245
sp|Q99618|CDCA3_HUMAN	CDCA3_HUMAN	CDCA3	0	0	0.326993	0.600775
sp|P08243|ASNS_HUMAN	ASNS_HUMAN	ASNS	0	0	0.323552	0.530071
sp|Q9BVP2|GNL3_HUMAN	GNL3_HUMAN	GNL3	9.04184	3.00696	0.321455	0.339632
sp|Q32MZ4|LRRF1_HUMAN	LRRF1_HUMAN	LRRFIP1	2.15598	1.46833	0.319707	0.675122
sp|P49792|RBP2_HUMAN	RBP2_HUMAN	RANBP2	7.41968	2.72391	0.319328	1.50101
sp|Q9UH92|MLX_HUMAN	MLX_HUMAN	MLX	0	0	0.319099	0.579222
sp|Q86XL3|ANKL2_HUMAN	ANKL2_HUMAN	ANKLE2	1.39098	1.1794	0.31731	-0.918
sp|O75663|TIPRL_HUMAN	TIPRL_HUMAN	TIPRL	1.83724	1.35545	0.316718	0.895365
sp|P61927|RL37_HUMAN	RL37_HUMAN	RPL37	1.33689	1.15624	0.31615	0.856841
sp|Q9Y520|PRC2C_HUMAN	PRC2C_HUMAN	PRRC2C	7.26737	2.69581	0.315641	1.43984
sp|Q15365|PCBP1_HUMAN	PCBP1_HUMAN	PCBP1	1.74351	1.32042	0.31477	0.433257
sp|Q92609|TBCD5_HUMAN	TBCD5_HUMAN	TBC1D5	0	0	0.310713	-0.524185
sp|Q13823|NOG2_HUMAN	NOG2_HUMAN	GNL2	2.95024	1.71763	0.309479	-1.03376
sp|Q969Q0|RL36L_HUMAN	RL36L_HUMAN	RPL36AL	4.26548	2.0653	0.309314	-1.05072
sp|Q9BXF6|RFIP5_HUMAN	RFIP5_HUMAN	RAB11FIP5	2.64886	1.62753	0.308253	1.04086
sp|O00571|DDX3X_HUMAN;sp|O15523|DDX3Y_HUMAN	DDX3X_HUMAN	DDX3X	2.85853	1.69072	0.307837	1.03751
sp|Q13625|ASPP2_HUMAN	ASPP2_HUMAN	TP53BP2	0	0	0.307058	-0.843254
sp|Q3YEC7|RABL6_HUMAN	RABL6_HUMAN	RABL6	3.27361	1.80931	0.306794	1.02961
sp|Q9BVC6|TM109_HUMAN	TM109_HUMAN	TMEM109	0	0	0.306703	-0.632537
sp|Q96BY7|ATG2B_HUMAN	ATG2B_HUMAN	ATG2B	5.11758	2.26221	0.306665	1.22852
sp|P11142|HSP7C_HUMAN	HSP7C_HUMAN	HSPA8	4.17373	2.04297	0.305528	-0.873991
sp|P52757|CHIO_HUMAN	CHIO_HUMAN	#N/A	#N/A	#N/A	0.30539	1.02162
sp|Q96AC1|FERM2_HUMAN	FERM2_HUMAN	FERMT2	1.24179	1.11435	0.303381	-0.720037
sp|P15880|RS2_HUMAN	RS2_HUMAN	RPS2	2.04926	1.43153	0.302809	-0.597498
sp|O43615|TIM44_HUMAN	TIM44_HUMAN	TIMM44	0	0	0.302552	-1.01533
sp|P49327|FAS_HUMAN	FAS_HUMAN	FASN	14.095	3.75433	0.300816	-0.509605
sp|P53621|COPA_HUMAN	COPA_HUMAN	COPA	0	0	0.299718	-0.698984
sp|P20020|AT2B1_HUMAN	AT2B1_HUMAN	ATP2B1	0.910302	0.954097	0.29897	-1.05552
sp|O00567|NOP56_HUMAN	NOP56_HUMAN	NOP56	4.13089	2.03246	0.297427	1.13914
sp|P52429|DGKE_HUMAN	DGKE_HUMAN	DGKE	0	0	0.297292	-0.556018
sp|Q9Y2R4|DDX52_HUMAN	DDX52_HUMAN	DDX52	3.70518	1.92488	0.296928	0.711296
sp|P61353|RL27_HUMAN	RL27_HUMAN	RPL27	1.64357	1.28202	0.296906	0.8193
sp|Q9HB71|CYBP_HUMAN	CYBP_HUMAN	CACYBP	0.63427	0.796411	0.293934	-0.954736
sp|Q15054|DPOD3_HUMAN	DPOD3_HUMAN	POLD3	0	0	0.292989	0.532339
sp|Q9Y5A9|YTHD2_HUMAN	YTHD2_HUMAN	YTHDF2	0	0	0.292802	-0.680644
sp|O95573|ACSL3_HUMAN	ACSL3_HUMAN	ACSL3	0	0	0.292263	-0.980736
sp|Q9UNZ2|NSF1C_HUMAN	NSF1C_HUMAN	NSFL1C	2.17866	1.47603	0.292043	0.627882
sp|P42694|HELZ_HUMAN	HELZ_HUMAN	HELZ	4.44597	2.10855	0.291169	-0.836796
sp|P46109|CRKL_HUMAN	CRKL_HUMAN	CRKL	2.37325	1.54054	0.289863	0.68955
sp|Q96SU4|OSBL9_HUMAN	OSBL9_HUMAN	OSBPL9	0	0	0.289262	-0.405411
sp|Q8NI27|THOC2_HUMAN	THOC2_HUMAN	THOC2	7.7908	2.7912	0.288409	0.921727
sp|Q9H501|ESF1_HUMAN	ESF1_HUMAN	ESF1	3.40887	1.84631	0.286589	0.696938
sp|Q14683|SMC1A_HUMAN	SMC1A_HUMAN	SMC1A	0.936141	0.967544	0.285358	-1.05198
sp|Q8NFA0|UBP32_HUMAN	UBP32_HUMAN	USP32	0	0	0.284519	0.593885
sp|Q9UK73|FEM1B_HUMAN	FEM1B_HUMAN	FEM1B	15.4627	3.93227	0.284104	0.345358
sp|Q8IVT5|KSR1_HUMAN	KSR1_HUMAN	KSR1	3.56508	1.88814	0.284104	0.396999
sp|O95486|SC24A_HUMAN	SC24A_HUMAN	SEC24A	0	0	0.284078	0.441622
sp|P11171|41_HUMAN	41_HUMAN	EPB41	4.73034	2.17493	0.28372	1.00647
sp|P22314|UBA1_HUMAN	UBA1_HUMAN	UBA1	1.79308	1.33906	0.283186	-0.541825
sp|Q9UGI8|TES_HUMAN	TES_HUMAN	TES	0	0	0.28312	0.393339
sp|P62910|RL32_HUMAN	RL32_HUMAN	RPL32	1.94467	1.39451	0.281096	0.703876
sp|Q9UG63|ABCF2_HUMAN	ABCF2_HUMAN	ABCF2	1.20287	1.09676	0.280658	-0.925358
sp|Q8IY81|SPB1_HUMAN	SPB1_HUMAN	FTSJ3	4.72474	2.17365	0.279305	0.641987
sp|Q8IV50|LYSM2_HUMAN	LYSM2_HUMAN	#N/A	#N/A	#N/A	0.278041	0.543631
sp|Q9NVN8|GNL3L_HUMAN	GNL3L_HUMAN	GNL3L	4.08105	2.02016	0.276139	0.860887
sp|Q96P70|IPO9_HUMAN	IPO9_HUMAN	IPO9	2.69682	1.6422	0.274871	-0.577875
sp|P32780|TF2H1_HUMAN	TF2H1_HUMAN	GTF2H1	0	0	0.273803	0.543386
sp|Q9H7N4|SFR19_HUMAN	SFR19_HUMAN	SCAF1	9.9426	3.15319	0.272942	0.803006
sp|O60763|USO1_HUMAN	USO1_HUMAN	USO1	1.55362	1.24644	0.272806	0.527595
sp|Q16543|CDC37_HUMAN	CDC37_HUMAN	CDC37	0	0	0.272312	-0.576285
sp|Q9NZI8|IF2B1_HUMAN	IF2B1_HUMAN	IGF2BP1	0	0	0.269971	0.632744
sp|Q14331|FRG1_HUMAN	FRG1_HUMAN	FRG1	1.26342	1.12402	0.269967	-0.800051
sp|Q9Y2K1|ZBTB1_HUMAN	ZBTB1_HUMAN	ZBTB1	4.61854	2.14908	0.269879	0.377893
sp|P49790|NU153_HUMAN	NU153_HUMAN	NUP153	3.52794	1.87828	0.269437	1.20515
sp|O94842|TOX4_HUMAN	TOX4_HUMAN	TOX4	0.819294	0.905149	0.268744	-1.01021
sp|Q5VWQ0|RSBN1_HUMAN	RSBN1_HUMAN	RSBN1	0	0	0.268054	0.53274
sp|P43487|RANG_HUMAN	RANG_HUMAN	RANBP1	0.894933	0.946009	0.26618	1.02825
sp|Q96GQ7|DDX27_HUMAN	DDX27_HUMAN	DDX27	5.32734	2.3081	0.265347	0.974503
sp|Q9NYJ8|TAB2_HUMAN	TAB2_HUMAN	TAB2	1.5457	1.24326	0.2641	0.548486
sp|P51957|NEK4_HUMAN	NEK4_HUMAN	NEK4	0	0	0.26301	0.385517
sp|P50990|TCPQ_HUMAN	TCPQ_HUMAN	CCT8	8.69438	2.94862	0.262916	-0.479815
sp|Q08379|GOGA2_HUMAN	GOGA2_HUMAN	GOLGA2	0.731483	0.855268	0.262674	-0.783659
sp|A0FGR8|ESYT2_HUMAN	ESYT2_HUMAN	ESYT2	3.45389	1.85847	0.262035	0.780592
sp|O95163|ELP1_HUMAN	ELP1_HUMAN	ELP1	11.3284	3.36577	0.261469	0.653357
sp|Q9NWB6|ARGL1_HUMAN	ARGL1_HUMAN	ARGLU1	1.03385	1.01678	0.261345	0.962867
sp|Q05682|CALD1_HUMAN	CALD1_HUMAN	CALD1	3.09492	1.75924	0.260908	0.857266
sp|Q9NVI7|ATD3A_HUMAN	ATD3A_HUMAN	ATAD3A	3.15899	1.77735	0.258413	0.751408
sp|P55196|AFAD_HUMAN	AFAD_HUMAN	AFDN	10.7879	3.2845	0.258002	1.00431
sp|P62258|1433E_HUMAN	1433E_HUMAN	YWHAE	1.12804	1.06209	0.257795	0.626149
sp|Q92598|HS105_HUMAN	HS105_HUMAN	HSPH1	4.61866	2.14911	0.257679	1.17979
sp|Q96A65|EXOC4_HUMAN	EXOC4_HUMAN	EXOC4	4.56718	2.1371	0.257027	0.799924
sp|O14654|IRS4_HUMAN	IRS4_HUMAN	IRS4	8.81342	2.96874	0.257021	1.2052
sp|Q14258|TRI25_HUMAN	TRI25_HUMAN	#N/A	#N/A	#N/A	0.256896	-0.34887
sp|P61006|RAB8A_HUMAN	RAB8A_HUMAN	RAB8A	0	0	0.256463	-1.22005
sp|Q8IWR0|Z3H7A_HUMAN	Z3H7A_HUMAN	ZC3H7A	0	0	0.255457	0.497715
sp|O75962|TRIO_HUMAN	TRIO_HUMAN	TRIO	0	0	0.25511	-0.453176
sp|P17812|PYRG1_HUMAN	PYRG1_HUMAN	CTPS1	2.80152	1.67377	0.25486	0.912498
sp|Q9P2D1|CHD7_HUMAN	CHD7_HUMAN	CHD7	0	0	0.253779	-0.368404
sp|O95239|KIF4A_HUMAN	KIF4A_HUMAN	KIF4A	0	0	0.249336	-0.348961
sp|Q8IXW5|RPAP2_HUMAN	RPAP2_HUMAN	RPAP2	0	0	0.249029	0.412513
sp|Q9UKY7|CDV3_HUMAN	CDV3_HUMAN	CDV3	0	0	0.248366	0.42552
sp|Q9UPS8|ANR26_HUMAN	ANR26_HUMAN	ANKRD26	3.35844	1.8326	0.246735	0.857439
sp|Q7Z569|BRAP_HUMAN	BRAP_HUMAN	BRAP	1.72524	1.31348	0.246544	-0.600603
sp|P83731|RL24_HUMAN	RL24_HUMAN	RPL24	3.46349	1.86104	0.246035	0.30842
sp|Q9HDC5|JPH1_HUMAN	JPH1_HUMAN	JPH1	4.04666	2.01163	0.245975	0.577131
sp|P63173|RL38_HUMAN	RL38_HUMAN	RPL38	1.74231	1.31997	0.244427	0.753718
sp|P27708|PYR1_HUMAN	PYR1_HUMAN	CAD	1.01932	1.00961	0.243253	-0.76513
sp|O95210|STBD1_HUMAN	STBD1_HUMAN	STBD1	0	0	0.239013	-0.575971
sp|O95487|SC24B_HUMAN	SC24B_HUMAN	SEC24B	1.19404	1.09272	0.238477	-0.705021
sp|P55072|TERA_HUMAN	TERA_HUMAN	VCP	0	0	0.237177	-0.583168
sp|P15311|EZRI_HUMAN	EZRI_HUMAN	EZR	4.676	2.16241	0.234376	0.643281
sp|O60841|IF2P_HUMAN	IF2P_HUMAN	EIF5B	3.59765	1.89675	0.23409	-0.761718
sp|P41440|S19A1_HUMAN	S19A1_HUMAN	SLC19A1	0	0	0.234069	-0.784413
sp|O15027|SC16A_HUMAN	SC16A_HUMAN	SEC16A	2.64216	1.62547	0.233538	-0.725332
sp|Q9Y6M7|S4A7_HUMAN	S4A7_HUMAN	SLC4A7	2.20637	1.48539	0.231139	-0.891822
sp|Q9UKF6|CPSF3_HUMAN	CPSF3_HUMAN	CPSF3	4.9014	2.21391	0.231017	0.794179
sp|P42356|PI4KA_HUMAN	PI4KA_HUMAN	PI4KA	1.43279	1.19699	0.230877	-0.43846
sp|Q14204|DYHC1_HUMAN	DYHC1_HUMAN	DYNC1H1	3.293	1.81466	0.230011	-0.58036
sp|Q01650|LAT1_HUMAN	LAT1_HUMAN	SLC7A5	0.754391	0.868557	0.22879	-0.789937
sp|P57772|SELB_HUMAN	SELB_HUMAN	EEFSEC	1.21574	1.10261	0.22842	-0.781592
sp|P18564|ITB6_HUMAN	ITB6_HUMAN	ITGB6	0	0	0.22833	-0.731365
sp|P51151|RAB9A_HUMAN	RAB9A_HUMAN	RAB9A	6.8691	2.6209	0.228	0.962875
sp|Q13206|DDX10_HUMAN	DDX10_HUMAN	DDX10	0	0	0.22582	0.750386
sp|P62899|RL31_HUMAN	RL31_HUMAN	RPL31	3.1945	1.78732	0.225278	-0.44216
sp|Q92615|LAR4B_HUMAN	LAR4B_HUMAN	LARP4B	3.17128	1.78081	0.224044	0.312252
sp|Q8NBN3|TM87A_HUMAN	TM87A_HUMAN	TMEM87A	2.24238	1.49746	0.223516	-0.818998
sp|P10599|THIO_HUMAN	THIO_HUMAN	TXN	0	0	0.223498	0.475368
sp|Q7Z5P9|MUC19_HUMAN	MUC19_HUMAN	MUC19	0	0	0.221296	1.19664
sp|O75533|SF3B1_HUMAN	SF3B1_HUMAN	SF3B1	1.31593	1.14714	0.221143	0.556191
sp|Q4KMP7|TB10B_HUMAN	TB10B_HUMAN	TBC1D10B	0.800606	0.894766	0.220996	-0.66196
sp|Q99878|H2A1J_HUMAN;sp|Q96KK5|H2A1H_HUMAN;sp|Q9BTM1|H2AJ_HUMAN;sp|Q16777|H2A2C_HUMAN;sp|Q93077|H2A1C_HUMAN;sp|Q7L7L0|H2A3_HUMAN;sp|Q6FI13|H2A2A_HUMAN;sp|P20671|H2A1D_HUMAN;sp|P0C0S8|H2A1_HUMAN;sp|P04908|H2A1B_HUMAN;sp|Q71UI9|H2AV_HUMAN;sp|P0C0S5|H2AZ_HUMAN;sp|Q96QV6|H2A1A_HUMAN;sp|P16104|H2AX_HUMAN	H2A1J_HUMAN	HIST1H2AJ	0	0	0.220946	0.587561
sp|Q9NSE4|SYIM_HUMAN	SYIM_HUMAN	IARS2	5.79116	2.40648	0.220941	0.944828
sp|P38432|COIL_HUMAN	COIL_HUMAN	COIL	4.33248	2.08146	0.220104	0.425166
sp|P57088|TMM33_HUMAN	TMM33_HUMAN	TMEM33	0	0	0.219979	-0.465373
sp|P30048|PRDX3_HUMAN	PRDX3_HUMAN	PRDX3	4.48463	2.11769	0.219877	0.585284
sp|O14974|MYPT1_HUMAN	MYPT1_HUMAN	PPP1R12A	0	0	0.219067	0.234878
sp|Q8N350|CBARP_HUMAN	CBARP_HUMAN	CBARP	0	0	0.217627	0.674627
sp|Q9H0S4|DDX47_HUMAN	DDX47_HUMAN	DDX47	0	0	0.217329	-0.559329
sp|P42677|RS27_HUMAN	RS27_HUMAN	RPS27	1.94052	1.39303	0.21625	0.36824
sp|Q13085|ACACA_HUMAN	ACACA_HUMAN	ACACA	25.2301	5.02296	0.216235	0.370203
sp|Q13428|TCOF_HUMAN	TCOF_HUMAN	TCOF1	8.42198	2.90206	0.215744	0.344307
sp|O43396|TXNL1_HUMAN	TXNL1_HUMAN	TXNL1	0.657389	0.810795	0.215133	-0.777207
sp|O43290|SNUT1_HUMAN	SNUT1_HUMAN	SART1	0	0	0.214883	0.709407
sp|Q96GA3|LTV1_HUMAN	LTV1_HUMAN	LTV1	1.75752	1.32572	0.214351	-0.762835
sp|P20340|RAB6A_HUMAN	RAB6A_HUMAN	RAB6A	1.599	1.26452	0.214173	-0.9171
sp|P61626|LYSC_HUMAN	LYSC_HUMAN	LYZ	5.70195	2.38788	0.212347	0.735553
sp|O75643|U520_HUMAN	U520_HUMAN	SNRNP200	1.11964	1.05813	0.212263	0.630639
sp|Q96JQ2|CLMN_HUMAN	CLMN_HUMAN	CLMN	2.04695	1.43072	0.210304	-0.44733
sp|O95248|MTMR5_HUMAN	MTMR5_HUMAN	SBF1	2.81624	1.67816	0.209694	0.845506
sp|Q96KP1|EXOC2_HUMAN	EXOC2_HUMAN	EXOC2	1.05358	1.02644	0.208636	-0.564704
sp|Q86Y13|DZIP3_HUMAN	DZIP3_HUMAN	DZIP3	0	0	0.207763	0.287372
sp|Q99614|TTC1_HUMAN	TTC1_HUMAN	TTC1	0	0	0.207648	-0.599952
sp|P13639|EF2_HUMAN	EF2_HUMAN	EEF2	4.022	2.00549	0.207396	0.415819
sp|P39023|RL3_HUMAN	RL3_HUMAN	RPL3	1.6504	1.28468	0.206714	0.62618
sp|P78527|PRKDC_HUMAN	PRKDC_HUMAN	PRKDC	9.11353	3.01886	0.206215	0.641932
sp|Q86XI2|CNDG2_HUMAN	CNDG2_HUMAN	NCAPG2	2.95555	1.71917	0.205565	0.382003
sp|P61758|PFD3_HUMAN	PFD3_HUMAN	VBP1	0	0	0.205262	0.455747
sp|Q9C0D5|TANC1_HUMAN	TANC1_HUMAN	TANC1	5.06997	2.25166	0.204896	0.6023
sp|O95292|VAPB_HUMAN	VAPB_HUMAN	VAPB	0.613469	0.783243	0.204841	-0.575881
sp|Q13459|MYO9B_HUMAN	MYO9B_HUMAN	MYO9B	4.81912	2.19525	0.204796	-0.792054
sp|P84157|MXRA7_HUMAN	MXRA7_HUMAN	MXRA7	0	0	0.203754	0.482208
sp|P09543|CN37_HUMAN	CN37_HUMAN	CNP	0	0	0.203503	-0.43571
sp|O43432|IF4G3_HUMAN	IF4G3_HUMAN	EIF4G3	2.59326	1.61036	0.202227	-0.654154
sp|Q9Y265|RUVB1_HUMAN	RUVB1_HUMAN	RUVBL1	2.99511	1.73064	0.201867	-0.724292
sp|Q3V6T2|GRDN_HUMAN	GRDN_HUMAN	CCDC88A	1.99632	1.41291	0.201595	-0.708531
sp|Q07889|SOS1_HUMAN	SOS1_HUMAN	SOS1	0	0	0.20114	-0.436545
sp|Q9BQ52|RNZ2_HUMAN	RNZ2_HUMAN	ELAC2	4.7074	2.16965	0.200627	0.505757
sp|P07737|PROF1_HUMAN	PROF1_HUMAN	PFN1	1.05328	1.02629	0.199266	0.645413
sp|Q6WKZ4|RFIP1_HUMAN	RFIP1_HUMAN	RAB11FIP1	3.9163	1.97896	0.198603	-0.67484
sp|Q12830|BPTF_HUMAN	BPTF_HUMAN	BPTF	0	0	0.198144	-0.615609
sp|O95613|PCNT_HUMAN	PCNT_HUMAN	PCNT	11.8006	3.4352	0.197599	-0.83838
sp|Q9BY89|K1671_HUMAN	K1671_HUMAN	KIAA1671	0	0	0.197274	0.411746
sp|O14981|BTAF1_HUMAN	BTAF1_HUMAN	BTAF1	3.64001	1.90788	0.196524	-0.401354
sp|Q8N183|MIMIT_HUMAN	MIMIT_HUMAN	NDUFAF2	1.9267	1.38806	0.195195	0.739691
sp|Q96ME7|ZN512_HUMAN	ZN512_HUMAN	ZNF512	3.311	1.81962	0.194923	0.481159
sp|P63261|ACTG_HUMAN;sp|P60709|ACTB_HUMAN	ACTG_HUMAN	ACTG1	0	0	0.194197	0.419133
sp|Q9HAV4|XPO5_HUMAN	XPO5_HUMAN	XPO5	0	0	0.194169	-0.229618
sp|Q9NRN7|ADPPT_HUMAN	ADPPT_HUMAN	AASDHPPT	0	0	0.194081	0.343938
sp|Q7Z4H7|HAUS6_HUMAN	HAUS6_HUMAN	HAUS6	3.81732	1.9538	0.193836	0.984326
sp|Q14694|UBP10_HUMAN	UBP10_HUMAN	USP10	1.82818	1.3521	0.193239	-0.519016
sp|P61586|RHOA_HUMAN;sp|P08134|RHOC_HUMAN	RHOA_HUMAN	RHOA	3.15561	1.7764	0.192938	0.966012
sp|P08238|HS90B_HUMAN	HS90B_HUMAN	HSP90AB1	5.2695	2.29554	0.192538	-0.351084
sp|P33176|KINH_HUMAN	KINH_HUMAN	KIF5B	12.7843	3.57552	0.19234	0.641929
sp|Q8N3C0|ASCC3_HUMAN	ASCC3_HUMAN	ASCC3	4.97985	2.23156	0.190634	0.679082
sp|P29966|MARCS_HUMAN	MARCS_HUMAN	MARCKS	3.42708	1.85124	0.187332	0.537597
sp|P48444|COPD_HUMAN	COPD_HUMAN	ARCN1	2.11444	1.45411	0.186851	-0.582873
sp|Q9UNY4|TTF2_HUMAN	TTF2_HUMAN	TTF2	1.74107	1.3195	0.186221	-0.532525
sp|Q92968|PEX13_HUMAN	PEX13_HUMAN	PEX13	0	0	0.184712	-0.429352
sp|O75976|CBPD_HUMAN	CBPD_HUMAN	CPD	4.3118	2.07649	0.184437	0.725523
sp|Q00325|MPCP_HUMAN	MPCP_HUMAN	SLC25A3	2.75209	1.65894	0.182879	0.404693
sp|P62304|RUXE_HUMAN	RUXE_HUMAN	SNRPE	2.70256	1.64395	0.18251	0.36708
sp|P48029|SC6A8_HUMAN	SC6A8_HUMAN	SLC6A8	1.25788	1.12155	0.181173	-0.488692
sp|Q9BZF9|UACA_HUMAN	UACA_HUMAN	UACA	4.22896	2.05644	0.180509	0.645171
sp|O14964|HGS_HUMAN	HGS_HUMAN	HGS	1.86099	1.36418	0.180444	-0.46793
sp|Q8WTT2|NOC3L_HUMAN	NOC3L_HUMAN	NOC3L	4.33984	2.08323	0.180438	0.547563
sp|Q9Y4P3|TBL2_HUMAN	TBL2_HUMAN	TBL2	0	0	0.180117	-0.589765
sp|Q12789|TF3C1_HUMAN	TF3C1_HUMAN	GTF3C1	4.95355	2.22566	0.179626	0.388548
sp|Q06124|PTN11_HUMAN	PTN11_HUMAN	PTPN11	0	0	0.179156	0.355841
sp|Q14498|RBM39_HUMAN	RBM39_HUMAN	RBM39	0	0	0.179093	-0.357078
sp|Q14126|DSG2_HUMAN	DSG2_HUMAN	DSG2	0.960147	0.979871	0.178226	0.588563
sp|P46782|RS5_HUMAN	RS5_HUMAN	RPS5	0	0	0.177748	-0.62236
sp|Q9NRY4|RHG35_HUMAN	RHG35_HUMAN	ARHGAP35	13.1011	3.61954	0.177651	-0.644902
sp|P55010|IF5_HUMAN	IF5_HUMAN	EIF5	3.55457	1.88536	0.176269	0.576848
sp|P19338|NUCL_HUMAN	NUCL_HUMAN	NCL	3.78903	1.94654	0.175867	0.682258
sp|Q9BZI7|REN3B_HUMAN	REN3B_HUMAN	UPF3B	2.05996	1.43526	0.174577	0.481486
sp|Q14157|UBP2L_HUMAN	UBP2L_HUMAN	UBAP2L	3.48701	1.86735	0.172832	0.677643
sp|Q15058|KIF14_HUMAN	KIF14_HUMAN	KIF14	1.51125	1.22933	0.17207	-0.81377
sp|Q9NVP1|DDX18_HUMAN	DDX18_HUMAN	DDX18	3.58421	1.8932	0.171129	0.726817
sp|Q9H7Z3|NRDE2_HUMAN	NRDE2_HUMAN	NRDE2	1.32307	1.15025	0.170943	-0.597351
sp|P49674|KC1E_HUMAN	KC1E_HUMAN	CSNK1E	0	0	0.169515	-0.350846
sp|Q9H792|PEAK1_HUMAN	PEAK1_HUMAN	PEAK1	0	0	0.167127	-0.278102
sp|Q8N5K1|CISD2_HUMAN	CISD2_HUMAN	CISD2	0.982967	0.991447	0.166843	0.551755
sp|P14625|ENPL_HUMAN	ENPL_HUMAN	HSP90B1	11.0929	3.3306	0.166281	0.56312
sp|Q02878|RL6_HUMAN	RL6_HUMAN	RPL6	1.1342	1.06499	0.165824	-0.594714
sp|P63241|IF5A1_HUMAN;sp|Q6IS14|IF5AL_HUMAN;sp|Q9GZV4|IF5A2_HUMAN	IF5A1_HUMAN	EIF5A	0.70539	0.839875	0.16516	0.475685
sp|Q86Y07|VRK2_HUMAN	VRK2_HUMAN	VRK2	0	0	0.164984	0.271974
sp|Q04637|IF4G1_HUMAN	IF4G1_HUMAN	EIF4G1	5.80242	2.40882	0.1641	-0.689597
sp|P51530|DNA2_HUMAN	DNA2_HUMAN	DNA2	2.76716	1.66348	0.163532	0.271081
sp|P11586|C1TC_HUMAN	C1TC_HUMAN	MTHFD1	4.24897	2.0613	0.162588	0.627948
sp|P18124|RL7_HUMAN	RL7_HUMAN	RPL7	0	0	0.162376	-0.35651
sp|O15173|PGRC2_HUMAN	PGRC2_HUMAN	PGRMC2	2.36764	1.53871	0.161799	-0.252331
sp|P06737|PYGL_HUMAN	PYGL_HUMAN	PYGL	3.02844	1.74024	0.160792	0.2543
sp|O00763|ACACB_HUMAN	ACACB_HUMAN	ACACB	12.2729	3.50327	0.160787	0.811311
sp|P06576|ATPB_HUMAN	ATPB_HUMAN	ATP5F1B	3.55381	1.88516	0.160021	0.42389
sp|Q15836|VAMP3_HUMAN	VAMP3_HUMAN	VAMP3	0.738789	0.859528	0.159122	-0.470809
sp|P62829|RL23_HUMAN	RL23_HUMAN	RPL23	3.63153	1.90566	0.157642	0.205181
sp|Q66K14|TBC9B_HUMAN	TBC9B_HUMAN	TBC1D9B	0	0	0.157557	0.251915
sp|P14618|KPYM_HUMAN	KPYM_HUMAN	PKM	0	0	0.157237	0.447579
sp|Q9BSD7|NTPCR_HUMAN	NTPCR_HUMAN	NTPCR	0	0	0.156748	0.360928
sp|O15357|SHIP2_HUMAN	SHIP2_HUMAN	INPPL1	0	0	0.156076	0.247772
sp|Q96KG9|SCYL1_HUMAN	SCYL1_HUMAN	SCYL1	1.85384	1.36156	0.156066	-0.416821
sp|Q9UHI8|ATS1_HUMAN	ATS1_HUMAN	ADAMTS1	0	0	0.15562	-0.291936
sp|Q2M1P5|KIF7_HUMAN	KIF7_HUMAN	KIF7	1.65126	1.28501	0.15499	-0.376937
sp|P35030|TRY3_HUMAN	TRY3_HUMAN	PRSS3	0	0	0.154762	-0.599908
sp|P61247|RS3A_HUMAN	RS3A_HUMAN	RPS3A	1.84211	1.35724	0.153399	-0.60988
sp|P35268|RL22_HUMAN	RL22_HUMAN	RPL22	0	0	0.152942	-0.535721
sp|P81605|DCD_HUMAN	DCD_HUMAN	DCD	0	0	0.152465	0.500251
sp|P40926|MDHM_HUMAN	MDHM_HUMAN	MDH2	0	0	0.151757	-0.388647
sp|O95202|LETM1_HUMAN	LETM1_HUMAN	LETM1	10.5993	3.25565	0.150671	0.631649
sp|P84077|ARF1_HUMAN;sp|P61204|ARF3_HUMAN	ARF1_HUMAN	ARF1	1.66547	1.29053	0.150526	0.285628
sp|Q96R06|SPAG5_HUMAN	SPAG5_HUMAN	SPAG5	6.11215	2.47228	0.148446	0.487137
sp|P49756|RBM25_HUMAN	RBM25_HUMAN	RBM25	4.11153	2.02769	0.148264	-0.532395
sp|P25398|RS12_HUMAN	RS12_HUMAN	RPS12	0.773867	0.879697	0.147378	-0.424847
sp|Q9UKJ3|GPTC8_HUMAN	GPTC8_HUMAN	GPATCH8	2.02625	1.42346	0.145307	-0.253505
sp|Q09666|AHNK_HUMAN	AHNK_HUMAN	AHNAK	9.93286	3.15164	0.144649	0.57172
sp|O95470|SGPL1_HUMAN	SGPL1_HUMAN	SGPL1	0.68652	0.828565	0.144052	-0.610648
sp|Q9Y5X1|SNX9_HUMAN	SNX9_HUMAN	SNX9	1.64894	1.28411	0.143095	-0.503505
sp|P07900|HS90A_HUMAN	HS90A_HUMAN	HSP90AA1	4.17945	2.04437	0.141666	0.547365
sp|P24752|THIL_HUMAN	THIL_HUMAN	ACAT1	4.95574	2.22615	0.141256	0.477819
sp|O75113|N4BP1_HUMAN	N4BP1_HUMAN	N4BP1	4.25114	2.06183	0.14039	0.593027
sp|Q14103|HNRPD_HUMAN	HNRPD_HUMAN	HNRNPD	0	0	0.140246	-0.267121
sp|Q9H425|CA198_HUMAN	CA198_HUMAN	C1orf198	0	0	0.139788	0.235623
sp|Q96RG2|PASK_HUMAN	PASK_HUMAN	PASK	59.66	7.72399	0.139241	0.347162
sp|Q9H6S0|YTDC2_HUMAN	YTDC2_HUMAN	YTHDC2	0	0	0.138163	-0.347878
sp|O95757|HS74L_HUMAN	HS74L_HUMAN	HSPA4L	6.02883	2.45537	0.136761	-0.368254
sp|P49411|EFTU_HUMAN	EFTU_HUMAN	TUFM	1.87002	1.36749	0.134896	0.357229
sp|P68363|TBA1B_HUMAN	TBA1B_HUMAN	TUBA1B	4.90086	2.21379	0.134588	-0.137517
sp|P05141|ADT2_HUMAN	ADT2_HUMAN	SLC25A5	3.81115	1.95222	0.13439	-0.190056
sp|Q13596|SNX1_HUMAN	SNX1_HUMAN	SNX1	1.76015	1.32671	0.132861	-0.496318
sp|P36542|ATPG_HUMAN	ATPG_HUMAN	ATP5F1C	1.34484	1.15967	0.131932	-0.475691
sp|P46781|RS9_HUMAN	RS9_HUMAN	RPS9	2.20423	1.48466	0.131824	0.449308
sp|P25685|DNJB1_HUMAN	DNJB1_HUMAN	DNAJB1	1.68584	1.2984	0.131401	-0.434112
sp|Q8N6R0|MET13_HUMAN	MET13_HUMAN	METTL13	1.08449	1.04139	0.13137	0.307657
sp|P12270|TPR_HUMAN	TPR_HUMAN	TPR	9.1183	3.01965	0.130055	0.427417
sp|P23588|IF4B_HUMAN	IF4B_HUMAN	EIF4B	2.84156	1.68569	0.129524	0.416013
sp|P62273|RS29_HUMAN	RS29_HUMAN	RPS29	1.70681	1.30645	0.129384	-0.606698
sp|P11940|PABP1_HUMAN	PABP1_HUMAN	PABPC1	2.05203	1.43249	0.127462	-0.313595
sp|Q9H6Z4|RANB3_HUMAN	RANB3_HUMAN	RANBP3	5.55955	2.35787	0.127333	0.379081
sp|Q9H4L5|OSBL3_HUMAN	OSBL3_HUMAN	OSBPL3	6.05487	2.46066	0.127272	0.467592
sp|Q15388|TOM20_HUMAN	TOM20_HUMAN	TOMM20	1.03644	1.01806	0.126258	0.448286
sp|A6NKT7|RGPD3_HUMAN	RGPD3_HUMAN	#N/A	#N/A	#N/A	0.125865	-0.40318
sp|O94991|SLIK5_HUMAN	SLIK5_HUMAN	SLITRK5	0.623206	0.789434	0.124271	-0.435468
sp|Q92841|DDX17_HUMAN	DDX17_HUMAN	DDX17	5.29323	2.3007	0.123848	0.385002
sp|P43003|EAA1_HUMAN	EAA1_HUMAN	SLC1A3	0	0	0.123724	-0.219366
sp|Q59GN2|R39L5_HUMAN;sp|P62891|RL39_HUMAN	R39L5_HUMAN	RPL39P5	0	0	0.123295	0.411566
sp|P13797|PLST_HUMAN	PLST_HUMAN	PLS3	4.34506	2.08448	0.122027	0.344569
sp|Q9Y2J2|E41L3_HUMAN	E41L3_HUMAN	EPB41L3	3.56277	1.88753	0.121796	-0.468658
sp|Q06830|PRDX1_HUMAN	PRDX1_HUMAN	PRDX1	1.5635	1.2504	0.121455	-0.20268
sp|Q9NVU7|SDA1_HUMAN	SDA1_HUMAN	SDAD1	2.44207	1.56271	0.121278	0.620451
sp|Q9BZE4|NOG1_HUMAN	NOG1_HUMAN	GTPBP4	3.30148	1.817	0.120543	0.504318
sp|Q7Z4Q2|HEAT3_HUMAN	HEAT3_HUMAN	HEATR3	0	0	0.119179	-0.196977
sp|Q9BSJ8|ESYT1_HUMAN	ESYT1_HUMAN	ESYT1	4.21722	2.05359	0.119008	0.484197
sp|P62753|RS6_HUMAN	RS6_HUMAN	RPS6	4.65245	2.15695	0.118997	0.15457
sp|Q14008|CKAP5_HUMAN	CKAP5_HUMAN	CKAP5	4.21365	2.05272	0.118842	-0.611333
sp|Q9UER7|DAXX_HUMAN	DAXX_HUMAN	DAXX	2.29905	1.51626	0.118642	-0.406886
sp|O95905|ECD_HUMAN	ECD_HUMAN	ECD	2.68483	1.63854	0.115676	0.306507
sp|Q9HCU5|PREB_HUMAN	PREB_HUMAN	PREB	0.63427	0.796411	0.114899	-0.367633
sp|Q6P2Q9|PRP8_HUMAN	PRP8_HUMAN	PRPF8	1.82192	1.34978	0.1131	-0.371665
sp|P56182|RRP1_HUMAN	RRP1_HUMAN	RRP1	1.70284	1.30493	0.112376	-0.382666
sp|Q13325|IFIT5_HUMAN	IFIT5_HUMAN	IFIT5	4.38687	2.09449	0.111768	-0.29533
sp|P26373|RL13_HUMAN	RL13_HUMAN	RPL13	2.1938	1.48115	0.111757	0.177576
sp|P46776|RL27A_HUMAN	RL27A_HUMAN	RPL27A	2.96609	1.72223	0.111553	0.167782
sp|Q99707|METH_HUMAN	METH_HUMAN	MTR	8.53139	2.92085	0.110701	-0.559426
sp|Q9Y2H2|SAC2_HUMAN	SAC2_HUMAN	INPP5F	1.51762	1.23192	0.110393	0.328593
sp|Q05823|RN5A_HUMAN	RN5A_HUMAN	RNASEL	1.36336	1.16763	0.110355	0.258429
sp|Q92616|GCN1_HUMAN	GCN1_HUMAN	GCN1	4.52775	2.12785	0.110279	0.430327
sp|Q9NQC7|CYLD_HUMAN	CYLD_HUMAN	CYLD	14.1794	3.76555	0.108128	-0.333003
sp|O43169|CYB5B_HUMAN	CYB5B_HUMAN	CYB5B	0.819284	0.905143	0.107982	0.416161
sp|Q8N0V3|RBFA_HUMAN	RBFA_HUMAN	RBFA	0	0	0.107802	-0.28994
sp|Q71U36|TBA1A_HUMAN	TBA1A_HUMAN	TUBA1A	0	0	0.107276	-0.283774
sp|Q8IWZ3|ANKH1_HUMAN	ANKH1_HUMAN	ANKHD1	4.67113	2.16128	0.106458	-0.592337
sp|P50914|RL14_HUMAN	RL14_HUMAN	RPL14	0	0	0.106436	-0.167103
sp|O60716|CTND1_HUMAN	CTND1_HUMAN	CTNND1	6.2315	2.4963	0.106399	0.409778
sp|P23381|SYWC_HUMAN	SYWC_HUMAN	WARS	0	0	0.106199	0.249827
sp|P27635|RL10_HUMAN	RL10_HUMAN	RPL10	3.2944	1.81505	0.105543	-0.130337
sp|P18621|RL17_HUMAN	RL17_HUMAN	RPL17	2.05593	1.43385	0.104932	-0.11495
sp|Q8WW12|PCNP_HUMAN	PCNP_HUMAN	PCNP	0	0	0.104632	-0.29172
sp|Q14137|BOP1_HUMAN	BOP1_HUMAN	BOP1	3.85869	1.96436	0.104278	0.367655
sp|Q8NE71|ABCF1_HUMAN	ABCF1_HUMAN	ABCF1	4.33285	2.08155	0.103161	0.291704
sp|Q9BZH6|WDR11_HUMAN	WDR11_HUMAN	WDR11	0	0	0.102409	-0.163987
sp|Q9Y2H6|FND3A_HUMAN	FND3A_HUMAN	FNDC3A	1.5933	1.26226	0.101177	0.444749
sp|Q8NEN9|PDZD8_HUMAN	PDZD8_HUMAN	PDZD8	5.62093	2.37085	0.100911	-0.433292
sp|Q9UNX3|RL26L_HUMAN	RL26L_HUMAN	RPL26L1	1.59256	1.26196	0.10085	-0.405253
sp|Q9BXB4|OSB11_HUMAN	OSB11_HUMAN	OSBPL11	7.4777	2.73454	0.100721	-0.254948
sp|Q13642|FHL1_HUMAN	FHL1_HUMAN	FHL1	1.17603	1.08445	0.0997881	0.309636
sp|Q5VT25|MRCKA_HUMAN	MRCKA_HUMAN	CDC42BPA	3.09467	1.75917	0.0990144	0.401412
sp|Q5VT06|CE350_HUMAN	CE350_HUMAN	CEP350	1.57352	1.2544	0.0988767	-0.344416
sp|P63010|AP2B1_HUMAN	AP2B1_HUMAN	AP2B1	7.44425	2.72841	0.0977169	0.217902
sp|P61019|RAB2A_HUMAN	RAB2A_HUMAN	RAB2A	0	0	0.097198	-0.572601
sp|Q9Y2I1|NISCH_HUMAN	NISCH_HUMAN	NISCH	4.29872	2.07333	0.0969732	0.33853
sp|Q9UKK9|NUDT5_HUMAN	NUDT5_HUMAN	NUDT5	0	0	0.0967701	-0.200034
sp|Q8TAT6|NPL4_HUMAN	NPL4_HUMAN	NPLOC4	1.57053	1.25321	0.0965323	-0.351386
sp|Q12797|ASPH_HUMAN	ASPH_HUMAN	ASPH	0	0	0.0951652	-0.210872
sp|Q8TEP8|CE192_HUMAN	CE192_HUMAN	CEP192	0	0	0.094477	-0.467327
sp|Q641Q2|WAC2A_HUMAN;sp|Q9Y4E1|WAC2C_HUMAN	WAC2A_HUMAN	WASHC2A	0	0	0.0941014	0.248488
sp|P51610|HCFC1_HUMAN	HCFC1_HUMAN	HCFC1	3.21724	1.79367	0.0928542	-0.432981
sp|Q9NX58|LYAR_HUMAN	LYAR_HUMAN	LYAR	3.11903	1.76608	0.0914833	-0.161636
sp|Q7Z2Z2|EFL1_HUMAN	EFL1_HUMAN	EFL1	0	0	0.0886295	0.1565
sp|P52701|MSH6_HUMAN	MSH6_HUMAN	MSH6	1.63322	1.27797	0.0883898	0.335272
sp|Q9BRX2|PELO_HUMAN	PELO_HUMAN	PELO	0	0	0.0876665	0.10898
sp|Q8IYB5|SMAP1_HUMAN	SMAP1_HUMAN	SMAP1	0	0	0.0852579	-0.241236
sp|Q9C0C9|UBE2O_HUMAN	UBE2O_HUMAN	UBE2O	1.94547	1.3948	0.0849008	0.253177
sp|Q9Y4L1|HYOU1_HUMAN	HYOU1_HUMAN	HYOU1	0	0	0.0846255	-0.179538
sp|Q5T9A4|ATD3B_HUMAN	ATD3B_HUMAN	#N/A	#N/A	#N/A	0.0841799	-0.18122
sp|Q7Z6Z7|HUWE1_HUMAN	HUWE1_HUMAN	HUWE1	0	0	0.0837014	-0.364257
sp|Q86YQ8|CPNE8_HUMAN	CPNE8_HUMAN	CPNE8	0	0	0.0835847	0.121498
sp|P00338|LDHA_HUMAN	LDHA_HUMAN	LDHA	0	0	0.0828958	0.301468
sp|Q8NFC6|BD1L1_HUMAN	BD1L1_HUMAN	BOD1L1	0	0	0.0822303	-0.142522
sp|Q15366|PCBP2_HUMAN	PCBP2_HUMAN	PCBP2	1.58106	1.2574	0.0819628	-0.199034
sp|P51970|NDUA8_HUMAN	NDUA8_HUMAN	NDUFA8	0	0	0.0816678	0.150396
sp|P46060|RAGP1_HUMAN	RAGP1_HUMAN	RANGAP1	4.23606	2.05817	0.0815673	-0.424443
sp|Q7Z2K8|GRIN1_HUMAN	GRIN1_HUMAN	GPRIN1	0	0	0.0765794	0.216318
sp|Q9Y6Y8|S23IP_HUMAN	S23IP_HUMAN	SEC23IP	3.42242	1.84998	0.076068	-0.24823
sp|P68371|TBB4B_HUMAN	TBB4B_HUMAN	TUBB4B	5.76086	2.40018	0.0758112	0.151149
sp|Q8NBF6|AVL9_HUMAN	AVL9_HUMAN	AVL9	0	0	0.0752666	0.14338
sp|Q9P2J5|SYLC_HUMAN	SYLC_HUMAN	LARS	1.91768	1.3848	0.0750988	0.225434
sp|P63220|RS21_HUMAN	RS21_HUMAN	RPS21	0	0	0.0737285	0.12509
sp|Q9HB21|PKHA1_HUMAN	PKHA1_HUMAN	PLEKHA1	2.20341	1.48439	0.0727248	0.135429
sp|P62241|RS8_HUMAN	RS8_HUMAN	RPS8	2.62122	1.61902	0.072365	-0.0985226
sp|A7KAX9|RHG32_HUMAN	RHG32_HUMAN	ARHGAP32	0	0	0.0714449	-0.244223
sp|O94874|UFL1_HUMAN	UFL1_HUMAN	UFL1	1.33973	1.15747	0.0709575	-0.272877
sp|Q96HP0|DOCK6_HUMAN	DOCK6_HUMAN	DOCK6	0	0	0.0707382	-0.35474
sp|P27348|1433T_HUMAN	1433T_HUMAN	YWHAQ	0	0	0.0693754	-0.117484
sp|Q16513|PKN2_HUMAN	PKN2_HUMAN	PKN2	6.51382	2.55222	0.0692901	0.242976
sp|O60645|EXOC3_HUMAN	EXOC3_HUMAN	EXOC3	2.61161	1.61605	0.0692705	-0.16741
sp|Q96KC8|DNJC1_HUMAN	DNJC1_HUMAN	DNAJC1	0	0	0.0686354	0.151023
sp|Q9Y3C1|NOP16_HUMAN	NOP16_HUMAN	NOP16	5.14556	2.26838	0.0685037	0.228558
sp|Q8NEY1|NAV1_HUMAN	NAV1_HUMAN	NAV1	0	0	0.0683606	0.173649
sp|P36873|PP1G_HUMAN;sp|P62136|PP1A_HUMAN	PP1G_HUMAN	PPP1CC	0	0	0.0683248	-0.109766
sp|Q13136|LIPA1_HUMAN	LIPA1_HUMAN	PPFIA1	0	0	0.0683115	-0.195821
sp|Q07065|CKAP4_HUMAN	CKAP4_HUMAN	CKAP4	6.04754	2.45918	0.0678156	0.186592
sp|Q6UB35|C1TM_HUMAN	C1TM_HUMAN	MTHFD1L	5.13334	2.26569	0.0673728	0.2058
sp|Q9UJV9|DDX41_HUMAN	DDX41_HUMAN	DDX41	0	0	0.0660254	-0.193784
sp|P04406|G3P_HUMAN	G3P_HUMAN	GAPDH	0.894417	0.945736	0.065863	0.250389
sp|Q1ED39|KNOP1_HUMAN	KNOP1_HUMAN	KNOP1	2.79449	1.67167	0.0657276	0.230628
sp|Q3SY69|AL1L2_HUMAN	AL1L2_HUMAN	ALDH1L2	3.18078	1.78347	0.0656576	-0.259852
sp|P52732|KIF11_HUMAN	KIF11_HUMAN	KIF11	1.87073	1.36775	0.0650879	-0.212244
sp|Q8IWB9|TEX2_HUMAN	TEX2_HUMAN	TEX2	3.88388	1.97076	0.0649159	-0.158705
sp|Q8IW35|CEP97_HUMAN	CEP97_HUMAN	CEP97	5.58891	2.36409	0.0641835	-0.129707
sp|O43592|XPOT_HUMAN	XPOT_HUMAN	XPOT	8.49816	2.91516	0.0632426	0.173192
sp|Q96AY4|TTC28_HUMAN	TTC28_HUMAN	TTC28	3.70206	1.92407	0.061806	-0.341552
sp|Q9P258|RCC2_HUMAN	RCC2_HUMAN	RCC2	1.82883	1.35234	0.0614039	0.153256
sp|O60664|PLIN3_HUMAN	PLIN3_HUMAN	PLIN3	0	0	0.0612955	-0.10806
sp|Q9H2H9|S38A1_HUMAN	S38A1_HUMAN	SLC38A1	0.788811	0.88815	0.061267	-0.296804
sp|Q9UKE5|TNIK_HUMAN	TNIK_HUMAN	TNIK	0	0	0.0610959	0.132943
sp|Q8IWX8|CHERP_HUMAN	CHERP_HUMAN	CHERP	14.2806	3.77896	0.0603992	0.181707
sp|Q86YS7|C2CD5_HUMAN	C2CD5_HUMAN	C2CD5	2.48196	1.57542	0.0600405	0.220842
sp|Q8N5F7|NKAP_HUMAN	NKAP_HUMAN	NKAP	15.6382	3.95451	0.0600277	0.19873
sp|Q13464|ROCK1_HUMAN	ROCK1_HUMAN	ROCK1	1.38491	1.17682	0.0600193	0.215808
sp|Q9C0C4|SEM4C_HUMAN	SEM4C_HUMAN	SEMA4C	4.02533	2.00632	0.0594896	0.192326
sp|Q96S66|CLCC1_HUMAN	CLCC1_HUMAN	CLCC1	4.01306	2.00326	0.0594558	-0.274079
sp|P62269|RS18_HUMAN	RS18_HUMAN	RPS18	2.03164	1.42535	0.0593631	0.175964
sp|Q5T8P6|RBM26_HUMAN	RBM26_HUMAN	RBM26	4.17187	2.04252	0.058253	0.191608
sp|Q9NRZ9|HELLS_HUMAN	HELLS_HUMAN	HELLS	0	0	0.0577036	-0.201921
sp|O14776|TCRG1_HUMAN	TCRG1_HUMAN	TCERG1	0	0	0.0571721	-0.179438
sp|Q14651|PLSI_HUMAN	PLSI_HUMAN	PLS1	0	0	0.0566854	0.0966624
sp|Q8IXI2|MIRO1_HUMAN	MIRO1_HUMAN	RHOT1	0	0	0.0559341	-0.123506
sp|Q9BQG0|MBB1A_HUMAN	MBB1A_HUMAN	MYBBP1A	8.55466	2.92483	0.0553934	0.0958307
sp|P07195|LDHB_HUMAN	LDHB_HUMAN	LDHB	0	0	0.0551273	0.175596
sp|P62280|RS11_HUMAN	RS11_HUMAN	RPS11	1.88684	1.37362	0.0544852	0.207886
sp|Q9Y217|MTMR6_HUMAN	MTMR6_HUMAN	MTMR6	1.93643	1.39156	0.0543753	-0.121421
sp|Q7L804|RFIP2_HUMAN	RFIP2_HUMAN	RAB11FIP2	4.49767	2.12077	0.0542971	0.177175
sp|P49588|SYAC_HUMAN	SYAC_HUMAN	AARS	1.40239	1.18423	0.0537704	-0.148433
sp|Q9HD67|MYO10_HUMAN	MYO10_HUMAN	MYO10	2.87031	1.6942	0.053061	0.19773
sp|Q9UHB9|SRP68_HUMAN	SRP68_HUMAN	SRP68	3.96692	1.99171	0.0523104	-0.222517
sp|P49458|SRP09_HUMAN	SRP09_HUMAN	SRP9	0	0	0.0522584	-0.131353
sp|O95831|AIFM1_HUMAN	AIFM1_HUMAN	AIFM1	0.966696	0.983207	0.0515519	0.145535
sp|P26641|EF1G_HUMAN	EF1G_HUMAN	EEF1G	0	0	0.0514894	-0.113096
sp|Q8N0Z3|SPICE_HUMAN	SPICE_HUMAN	SPICE1	3.62515	1.90398	0.0510253	0.201505
sp|Q14789|GOGB1_HUMAN	GOGB1_HUMAN	GOLGB1	9.52714	3.08661	0.050149	0.255557
sp|Q7KZF4|SND1_HUMAN	SND1_HUMAN	SND1	3.691	1.9212	0.04924	0.210729
sp|Q6MZP7|LIN54_HUMAN	LIN54_HUMAN	LIN54	0	0	0.0491858	-0.125703
sp|Q9UNF1|MAGD2_HUMAN	MAGD2_HUMAN	MAGED2	2.00344	1.41543	0.0488733	0.165282
sp|P09874|PARP1_HUMAN	PARP1_HUMAN	PARP1	3.93534	1.98377	0.0487944	0.103737
sp|Q86UK7|ZN598_HUMAN	ZN598_HUMAN	ZNF598	5.81983	2.41243	0.0486976	-0.164613
sp|Q86UB9|TM135_HUMAN	TM135_HUMAN	TMEM135	0	0	0.0480165	-0.151477
sp|Q9Y2X3|NOP58_HUMAN	NOP58_HUMAN	NOP58	2.61807	1.61805	0.0477766	-0.150777
sp|Q9NZM3|ITSN2_HUMAN	ITSN2_HUMAN	ITSN2	0	0	0.047764	0.129939
sp|P24928|RPB1_HUMAN	RPB1_HUMAN	POLR2A	3.88596	1.97128	0.0477104	0.22261
sp|Q8TEQ6|GEMI5_HUMAN	GEMI5_HUMAN	GEMIN5	5.61575	2.36976	0.0474964	-0.237151
sp|Q9Y2Z0|SGT1_HUMAN	SGT1_HUMAN	SUGT1	1.9007	1.37866	0.0473599	0.171366
sp|Q5VZ89|DEN4C_HUMAN	DEN4C_HUMAN	DENND4C	6.00997	2.45152	0.04697	0.225013
sp|Q9BQA1|MEP50_HUMAN	MEP50_HUMAN	WDR77	1.41163	1.18812	0.0469089	0.129483
sp|Q15005|SPCS2_HUMAN	SPCS2_HUMAN	SPCS2	0	0	0.0459351	-0.10899
sp|Q07960|RHG01_HUMAN	RHG01_HUMAN	ARHGAP1	0.90628	0.951987	0.0455929	-0.258442
sp|Q05397|FAK1_HUMAN	FAK1_HUMAN	PTK2	0	0	0.0440698	0.0756359
sp|P50402|EMD_HUMAN	EMD_HUMAN	EMD	0.530212	0.728156	0.0434231	0.135388
sp|P62263|RS14_HUMAN	RS14_HUMAN	RPS14	1.63995	1.2806	0.0425982	0.136418
sp|Q9GZT9|EGLN1_HUMAN	EGLN1_HUMAN	EGLN1	2.35588	1.53489	0.0425508	0.0988014
sp|Q9HBM0|VEZA_HUMAN	VEZA_HUMAN	VEZT	6.1724	2.48443	0.0424473	0.14996
sp|P22681|CBL_HUMAN	CBL_HUMAN	CBL	1.82877	1.35232	0.0414422	-0.116513
sp|P61026|RAB10_HUMAN	RAB10_HUMAN	RAB10	17.1179	4.13738	0.0410784	0.20764
sp|Q8IWS0|PHF6_HUMAN	PHF6_HUMAN	PHF6	3.0541	1.7476	0.0406837	0.166583
sp|P42766|RL35_HUMAN	RL35_HUMAN	RPL35	3.5893	1.89454	0.0398167	0.0582926
sp|O94806|KPCD3_HUMAN	KPCD3_HUMAN	PRKD3	2.45486	1.5668	0.0390801	-0.065136
sp|P23396|RS3_HUMAN	RS3_HUMAN	RPS3	2.33622	1.52847	0.0385543	-0.141833
sp|O75179|ANR17_HUMAN	ANR17_HUMAN	ANKRD17	4.12468	2.03093	0.0381338	-0.188791
sp|Q9UHR5|S30BP_HUMAN	S30BP_HUMAN	SAP30BP	0	0	0.0374979	0.0922979
sp|Q9Y5Z9|UBIA1_HUMAN	UBIA1_HUMAN	UBIAD1	0	0	0.037209	-0.114337
sp|Q9P035|HACD3_HUMAN	HACD3_HUMAN	HACD3	3.65635	1.91216	0.0371779	-0.0607637
sp|O94906|PRP6_HUMAN	PRP6_HUMAN	PRPF6	4.68103	2.16357	0.0371051	0.172349
sp|P07437|TBB5_HUMAN	TBB5_HUMAN	TUBB	5.82535	2.41358	0.0362315	0.0807847
sp|Q9Y2X9|ZN281_HUMAN	ZN281_HUMAN	ZNF281	1.51618	1.23133	0.0360304	0.119421
sp|Q9NTK5|OLA1_HUMAN	OLA1_HUMAN	OLA1	0	0	0.0355669	-0.0616311
sp|Q86TX2|ACOT1_HUMAN	ACOT1_HUMAN	#N/A	0	0	0.0354738	-0.190474
sp|P62851|RS25_HUMAN	RS25_HUMAN	RPS25	1.43944	1.19977	0.0350163	-0.0950974
sp|O75694|NU155_HUMAN	NU155_HUMAN	NUP155	3.82916	1.95682	0.0349852	0.163229
sp|Q9Y678|COPG1_HUMAN	COPG1_HUMAN	COPG1	1.98305	1.40821	0.0343148	0.0904425
sp|P46108|CRK_HUMAN	CRK_HUMAN	CRK	2.01173	1.41836	0.0340043	-0.087253
sp|Q9NZJ5|E2AK3_HUMAN	E2AK3_HUMAN	EIF2AK3	0	0	0.033869	-0.0963223
sp|O43175|SERA_HUMAN	SERA_HUMAN	PHGDH	1.09402	1.04596	0.0329732	0.113415
sp|Q96SN8|CK5P2_HUMAN	CK5P2_HUMAN	CDK5RAP2	0	0	0.0325645	0.117699
sp|Q99879|H2B1M_HUMAN;sp|Q99880|H2B1L_HUMAN;sp|Q99877|H2B1N_HUMAN;sp|Q93079|H2B1H_HUMAN;sp|Q5QNW6|H2B2F_HUMAN;sp|P62807|H2B1C_HUMAN;sp|P58876|H2B1D_HUMAN;sp|P57053|H2BFS_HUMAN;sp|O60814|H2B1K_HUMAN	H2B1M_HUMAN	#N/A	#N/A	#N/A	0.032333	-0.11992
sp|Q9NR09|BIRC6_HUMAN	BIRC6_HUMAN	BIRC6	3.1402	1.77206	0.0322057	-0.160502
sp|O75182|SIN3B_HUMAN	SIN3B_HUMAN	SIN3B	0	0	0.0308254	0.0594332
sp|Q15398|DLGP5_HUMAN	DLGP5_HUMAN	DLGAP5	0	0	0.0306879	-0.0844703
sp|Q99755|PI51A_HUMAN	PI51A_HUMAN	PIP5K1A	5.29582	2.30126	0.0306867	-0.117401
sp|P51003|PAPOA_HUMAN	PAPOA_HUMAN	PAPOLA	1.31843	1.14823	0.0304744	-0.0785491
sp|Q86TP1|PRUNE_HUMAN	PRUNE_HUMAN	PRUNE1	2.7559	1.66009	0.0302103	-0.0616771
sp|O95372|LYPA2_HUMAN	LYPA2_HUMAN	LYPLA2	0.736638	0.858276	0.0301305	0.118238
sp|Q8TCU4|ALMS1_HUMAN	ALMS1_HUMAN	ALMS1	9.19723	3.03269	0.0300377	0.13553
sp|Q9UJS0|CMC2_HUMAN	CMC2_HUMAN	SLC25A13	2.15415	1.4677	0.0298304	0.0925257
sp|Q9Y4W2|LAS1L_HUMAN	LAS1L_HUMAN	LAS1L	9.91326	3.14853	0.0296193	0.0759237
sp|O43264|ZW10_HUMAN	ZW10_HUMAN	ZW10	0	0	0.0294611	-0.0450051
sp|Q5JSH3|WDR44_HUMAN	WDR44_HUMAN	WDR44	1.71534	1.30971	0.0293391	0.127173
sp|Q12923|PTN13_HUMAN	PTN13_HUMAN	PTPN13	7.54124	2.74613	0.0290772	-0.135218
sp|P39019|RS19_HUMAN	RS19_HUMAN	RPS19	2.0355	1.42671	0.028741	-0.077346
sp|P61254|RL26_HUMAN	RL26_HUMAN	RPL26	3.91753	1.97928	0.0276217	-0.0476784
sp|P51149|RAB7A_HUMAN	RAB7A_HUMAN	RAB7A	5.81334	2.41109	0.0273231	0.134766
sp|Q9NVI1|FANCI_HUMAN	FANCI_HUMAN	FANCI	1.73013	1.31534	0.0266993	-0.0692546
sp|P62826|RAN_HUMAN	RAN_HUMAN	RAN	0	0	0.0265424	0.088153
sp|P45880|VDAC2_HUMAN	VDAC2_HUMAN	VDAC2	4.85673	2.2038	0.0239136	0.107708
sp|O14737|PDCD5_HUMAN	PDCD5_HUMAN	PDCD5	1.95055	1.39662	0.0235849	-0.047944
sp|Q12965|MYO1E_HUMAN	MYO1E_HUMAN	MYO1E	0.904868	0.951245	0.0233621	-0.0560221
sp|P21397|AOFA_HUMAN	AOFA_HUMAN	MAOA	7.58598	2.75427	0.0232815	-0.159156
sp|Q96EX3|WDR34_HUMAN	WDR34_HUMAN	WDR34	3.01316	1.73585	0.0230456	-0.0551894
sp|P25098|ARBK1_HUMAN	ARBK1_HUMAN	GRK2	5.42704	2.3296	0.0224963	0.0368479
sp|Q15382|RHEB_HUMAN	RHEB_HUMAN	RHEB	31.4228	5.6056	0.0223921	-0.140082
sp|O00483|NDUA4_HUMAN	NDUA4_HUMAN	NDUFA4	1.07902	1.03876	0.0222409	0.0737533
sp|Q658Y4|F91A1_HUMAN	F91A1_HUMAN	FAM91A1	5.72368	2.39242	0.0222223	0.102115
sp|Q15652|JHD2C_HUMAN	JHD2C_HUMAN	JMJD1C	0	0	0.0218779	-0.0461115
sp|P36776|LONM_HUMAN	LONM_HUMAN	LONP1	0	0	0.0217696	-0.0644041
sp|P61978|HNRPK_HUMAN	HNRPK_HUMAN	HNRNPK	1.75732	1.32564	0.0206514	0.0739672
sp|Q00839|HNRPU_HUMAN	HNRPU_HUMAN	HNRNPU	2.8685	1.69366	0.020402	0.0781068
sp|P12236|ADT3_HUMAN	ADT3_HUMAN	#N/A	5.71597	2.39081	0.0202081	0.0661478
sp|A5YKK6|CNOT1_HUMAN	CNOT1_HUMAN	CNOT1	1.21069	1.10032	0.0182452	-0.0612258
sp|Q15907|RB11B_HUMAN	RB11B_HUMAN	RAB11B	1.55074	1.24529	0.0174565	-0.102231
sp|Q8TD26|CHD6_HUMAN	CHD6_HUMAN	CHD6	18.9902	4.35777	0.0171219	0.035164
sp|P05023|AT1A1_HUMAN	AT1A1_HUMAN	ATP1A1	4.50925	2.1235	0.016817	-0.0644596
sp|Q9P2E9|RRBP1_HUMAN	RRBP1_HUMAN	RRBP1	5.88514	2.42593	0.0157975	-0.0974422
sp|P60866|RS20_HUMAN	RS20_HUMAN	RPS20	1.26574	1.12505	0.0156229	0.0632196
sp|P36578|RL4_HUMAN	RL4_HUMAN	RPL4	1.40399	1.1849	0.0151823	-0.0505151
sp|P62847|RS24_HUMAN	RS24_HUMAN	RPS24	2.20774	1.48585	0.01515	0.030154
sp|Q5HYK7|SH319_HUMAN	SH319_HUMAN	SH3D19	0	0	0.0135639	0.0393613
sp|Q86V48|LUZP1_HUMAN	LUZP1_HUMAN	LUZP1	0	0	0.0126511	-0.0266658
sp|Q07020|RL18_HUMAN	RL18_HUMAN	RPL18	1.15431	1.07439	0.0125895	0.0486519
sp|Q9H0A0|NAT10_HUMAN	NAT10_HUMAN	NAT10	3.49779	1.87024	0.0118514	0.053464
sp|Q08211|DHX9_HUMAN	DHX9_HUMAN	DHX9	1.6238	1.27428	0.0116113	-0.0268648
sp|Q96HC4|PDLI5_HUMAN	PDLI5_HUMAN	PDLIM5	2.2497	1.4999	0.0115563	-0.0452754
sp|Q9NTJ3|SMC4_HUMAN	SMC4_HUMAN	SMC4	3.40468	1.84518	0.0107534	0.059195
sp|Q9UQL6|HDAC5_HUMAN	HDAC5_HUMAN	HDAC5	1.51651	1.23147	0.010705	0.0295166
sp|P23528|COF1_HUMAN	COF1_HUMAN	CFL1	0	0	0.0104537	0.0348126
sp|P42566|EPS15_HUMAN	EPS15_HUMAN	EPS15	1.23902	1.11311	0.0103489	-0.0381312
sp|Q8NG31|KNL1_HUMAN	KNL1_HUMAN	KNL1	5.89365	2.42768	0.00940818	0.049384
sp|P49454|CENPF_HUMAN	CENPF_HUMAN	CENPF	0	0	0.00931386	0.0359982
sp|P60953|CDC42_HUMAN	CDC42_HUMAN	CDC42	0	0	0.00894913	0.050307
sp|P78318|IGBP1_HUMAN	IGBP1_HUMAN	IGBP1	0	0	0.00832163	-0.0178379
sp|Q8TCT9|HM13_HUMAN	HM13_HUMAN	HM13	0	0	0.00735959	0.0277222
sp|P31943|HNRH1_HUMAN	HNRH1_HUMAN	HNRNPH1	0	0	0.00689339	-0.0107835
sp|Q9BPX3|CND3_HUMAN	CND3_HUMAN	NCAPG	0	0	0.0065915	0.0146112
sp|Q03001|DYST_HUMAN	DYST_HUMAN	DST	7.33749	2.70878	0.00625282	0.0364752
sp|P52655|TF2AA_HUMAN	TF2AA_HUMAN	#N/A	#N/A	#N/A	0.00607814	-0.015299
sp|Q9UQN3|CHM2B_HUMAN	CHM2B_HUMAN	CHMP2B	0.906419	0.952061	0.00602718	-0.0232228
sp|P12277|KCRB_HUMAN	KCRB_HUMAN	CKB	0	0	0.00543548	-0.0115565
sp|P49757|NUMB_HUMAN	NUMB_HUMAN	NUMB	1.71203	1.30845	0.00539054	-0.0220116
sp|P22234|PUR6_HUMAN	PUR6_HUMAN	PAICS	0	0	0.00503885	-0.0104162
sp|P50851|LRBA_HUMAN	LRBA_HUMAN	LRBA	6.91949	2.63049	0.00409012	-0.0223235
sp|Q15311|RBP1_HUMAN	RBP1_HUMAN	RALBP1	41.5798	6.44824	0.00372905	-0.0152443
sp|Q9C0B7|TNG6_HUMAN	TNG6_HUMAN	TANGO6	1.58164	1.25763	0.00240881	0.0070831
sp|O43491|E41L2_HUMAN	E41L2_HUMAN	EPB41L2	4.60041	2.14486	0.00221634	-0.00847825
sp|Q5JRA6|MIA3_HUMAN	MIA3_HUMAN	MIA3	2.8795	1.69691	0.00127534	0.00562631
sp|Q6PML9|ZNT9_HUMAN	ZNT9_HUMAN	SLC30A9	2.55923	1.59976	0.00123384	0.00621663
sp|O00541|PESC_HUMAN	PESC_HUMAN	PES1	1.18388	1.08806	0.000812466	-0.00304059

## Sheet: Rab6 QL
Majority protein IDs	Uniprot	Gene NAME	WD score	Root WD score	Log Student's T-test p-value Rab6 QL	Student's T-test Difference Rab6 QL
sp|Q14203|DCTN1_HUMAN	DCTN1_HUMAN	DCTN1	4524.56	67.2649	30.3662	12.5902
sp|Q8TD16|BICD2_HUMAN	BICD2_HUMAN	BICD2	194.459	13.9449	25.1583	10.0246
sp|Q6ZUT9|DEN5B_HUMAN	DEN5B_HUMAN	DENND5B	1020.86	31.9509	19.3478	7.35544
sp|Q15057|ACAP2_HUMAN	ACAP2_HUMAN	ACAP2	391.482	19.7859	17.9779	6.46916
sp|Q96G01|BICD1_HUMAN	BICD1_HUMAN	BICD1	478.587	21.8766	17.9315	6.25665
sp|Q96T51|RUFY1_HUMAN	RUFY1_HUMAN	RUFY1	119.13	10.9147	16.968	6.51306
sp|Q8IYB1|M21D2_HUMAN	M21D2_HUMAN	MB21D2	10673	103.31	16.498	6.00963
sp|Q07866|KLC1_HUMAN	KLC1_HUMAN	KLC1	5313.7	72.8951	15.7359	5.86152
sp|Q5R372|RBG1L_HUMAN	RBG1L_HUMAN	RABGAP1L	199.227	14.1148	15.2619	7.19912
sp|Q6IQ26|DEN5A_HUMAN	DEN5A_HUMAN	DENND5A	1256.96	35.4536	12.5159	4.96277
sp|O15083|ERC2_HUMAN	ERC2_HUMAN	ERC2	13.8687	3.72407	12.3066	5.56865
sp|O15013|ARHGA_HUMAN	ARHGA_HUMAN	ARHGEF10	918.538	30.3074	11.9556	6.16364
sp|Q13613|MTMR1_HUMAN	MTMR1_HUMAN	MTMR1	282.385	16.8043	11.7645	7.18695
sp|O60447|EVI5_HUMAN	EVI5_HUMAN	EVI5	53.2075	7.29435	10.6719	5.30555
sp|Q5VU43|MYOME_HUMAN	MYOME_HUMAN	PDE4DIP	724.717	26.9206	10.4838	4.46644
sp|Q86WG5|MTMRD_HUMAN	MTMRD_HUMAN	SBF2	1611.18	40.1395	10.0732	5.01184
sp|Q9P1Z2|CACO1_HUMAN	CACO1_HUMAN	CALCOCO1	308.486	17.5638	8.80307	3.60761
sp|Q9Y4I1|MYO5A_HUMAN	MYO5A_HUMAN	MYO5A	123.692	11.1217	8.80038	6.45751
sp|Q7Z3U7|MON2_HUMAN	MON2_HUMAN	MON2	421.042	20.5193	8.79584	4.25625
sp|A0JNW5|UH1BL_HUMAN	UH1BL_HUMAN	UHRF1BP1L	296.892	17.2306	7.82798	4.67503
sp|Q9NS87|KIF15_HUMAN	KIF15_HUMAN	KIF15	467.399	21.6194	7.20872	4.52751
sp|Q9Y3P9|RBGP1_HUMAN	RBGP1_HUMAN	RABGAP1	56.7145	7.5309	7.16795	6.3446
sp|Q9Y2H2|SAC2_HUMAN	SAC2_HUMAN	INPP5F	36.3993	6.03319	5.91473	6.36059
sp|Q9P2D3|HTR5B_HUMAN	HTR5B_HUMAN	HEATR5B	370.413	19.2461	5.91078	3.93207
sp|Q8WUA4|TF3C2_HUMAN	TF3C2_HUMAN	GTF3C2	0	0	5.61134	3.21291
sp|Q01968|OCRL_HUMAN	OCRL_HUMAN	OCRL	19.1898	4.38062	5.28927	7.20411
sp|O15078|CE290_HUMAN	CE290_HUMAN	CEP290	4216.4	64.9338	5.1285	3.95039
sp|Q8IZQ1|WDFY3_HUMAN	WDFY3_HUMAN	WDFY3	989.804	31.4612	5.03077	3.12131
sp|Q8N4B1|SESQ1_HUMAN	SESQ1_HUMAN	#N/A	#N/A	#N/A	4.96715	2.45889
sp|P82094|TMF1_HUMAN	TMF1_HUMAN	TMF1	25.1707	5.01704	4.89062	6.50225
sp|P20340|RAB6A_HUMAN	RAB6A_HUMAN	RAB6A	188.198	13.7185	4.81777	8.43165
sp|Q8N573|OXR1_HUMAN	OXR1_HUMAN	OXR1	7.34469	2.71011	4.64573	2.56728
sp|O95248|MTMR5_HUMAN	MTMR5_HUMAN	SBF1	148.659	12.1926	4.42318	7.34967
sp|Q8IUD2|RB6I2_HUMAN	RB6I2_HUMAN	ERC1	14.4864	3.8061	4.17618	7.31167
sp|O43795|MYO1B_HUMAN	MYO1B_HUMAN	MYO1B	151.69	12.3163	4.17328	2.28207
sp|P55011|S12A2_HUMAN	S12A2_HUMAN	SLC12A2	1.71464	1.30944	4.16858	-3.80322
sp|Q8IWJ2|GCC2_HUMAN	GCC2_HUMAN	GCC2	44.0103	6.63402	4.09833	8.50882
sp|P56589|PEX3_HUMAN	PEX3_HUMAN	PEX3	37.0134	6.08386	3.80005	4.75719
sp|Q9UPU7|TBD2B_HUMAN	TBD2B_HUMAN	TBC1D2B	19.1468	4.37571	3.63328	3.88465
sp|Q7Z3E2|CC186_HUMAN	CC186_HUMAN	CCDC186	14.3491	3.78802	3.48182	2.88356
sp|P33176|KINH_HUMAN	KINH_HUMAN	KIF5B	26.8698	5.18361	3.464	5.11798
sp|O43491|E41L2_HUMAN	E41L2_HUMAN	EPB41L2	2.68175	1.63761	3.38674	-5.3347
sp|Q8NB25|F184A_HUMAN	F184A_HUMAN	FAM184A	7.02051	2.64963	3.30648	2.45267
sp|Q8NFA0|UBP32_HUMAN	UBP32_HUMAN	USP32	16.1776	4.02214	3.18713	3.23881
sp|O96004|HAND1_HUMAN	HAND1_HUMAN	HAND1	11.3462	3.36841	3.16413	2.1563
sp|Q9UHI8|ATS1_HUMAN	ATS1_HUMAN	ADAMTS1	18.0901	4.25325	3.14416	2.60436
sp|Q9Y6D5|BIG2_HUMAN	BIG2_HUMAN	ARFGEF2	2.60592	1.61429	3.10011	1.50101
sp|P26374|RAE2_HUMAN	RAE2_HUMAN	CHML	22.0811	4.69905	3.09718	4.83829
sp|Q9HD67|MYO10_HUMAN	MYO10_HUMAN	MYO10	35.2125	5.93401	3.0773	4.42702
sp|O94822|LTN1_HUMAN	LTN1_HUMAN	LTN1	24.9057	4.99056	3.07364	4.56532
sp|Q9Y426|C2CD2_HUMAN	C2CD2_HUMAN	C2CD2	84.5889	9.19722	2.99011	2.62862
sp|Q9UPP1|PHF8_HUMAN	PHF8_HUMAN	PHF8	23.7236	4.87069	2.76659	3.59769
sp|Q9Y266|NUDC_HUMAN	NUDC_HUMAN	NUDC	2.31527	1.5216	2.58325	-2.80971
sp|Q7RTP6|MICA3_HUMAN	MICA3_HUMAN	MICAL3	173.723	13.1804	2.54039	2.81682
sp|P11142|HSP7C_HUMAN	HSP7C_HUMAN	HSPA8	3.59354	1.89566	2.51406	-4.01069
sp|Q9Y2R4|DDX52_HUMAN	DDX52_HUMAN	DDX52	13.6426	3.69359	2.30767	2.97764
sp|Q9UDT6|CLIP2_HUMAN	CLIP2_HUMAN	#N/A	#N/A	#N/A	2.27657	3.75421
sp|Q15054|DPOD3_HUMAN	DPOD3_HUMAN	POLD3	34.5183	5.87523	2.27376	2.25497
sp|Q13614|MTMR2_HUMAN	MTMR2_HUMAN	MTMR2	18.9379	4.35177	2.23539	1.55982
sp|Q6ZNB6|NFXL1_HUMAN	NFXL1_HUMAN	NFXL1	12.331	3.51155	2.21221	2.59473
sp|Q9NPI1|BRD7_HUMAN	BRD7_HUMAN	BRD7	54.27	7.36682	2.07743	1.93066
sp|O00471|EXOC5_HUMAN	EXOC5_HUMAN	EXOC5	14.5454	3.81384	2.04982	1.53506
sp|Q5DJT8|CT452_HUMAN;sp|P0DMV2|CT459_HUMAN;sp|P0DMV1|CT458_HUMAN;sp|P0DMU9|CT45A_HUMAN;sp|Q8NHU0|CT453_HUMAN;sp|Q5HYN5|CT451_HUMAN;sp|P0DMV0|CT457_HUMAN;sp|P0DMU8|CT455_HUMAN;sp|P0DMU7|CT456_HUMAN	CT452_HUMAN	CT45A2	41.8787	6.47138	2.01886	3.1038
sp|Q96SU4|OSBL9_HUMAN	OSBL9_HUMAN	OSBPL9	4.21689	2.05351	1.98758	1.81808
sp|Q99996|AKAP9_HUMAN	AKAP9_HUMAN	AKAP9	41.6546	6.45404	1.96827	5.27571
sp|Q7Z7L1|SLN11_HUMAN	SLN11_HUMAN	SLFN11	89.2009	9.44462	1.92736	2.49205
sp|O14654|IRS4_HUMAN	IRS4_HUMAN	IRS4	2.60273	1.6133	1.83278	-4.87208
sp|P31948|STIP1_HUMAN	STIP1_HUMAN	STIP1	0.837381	0.915085	1.82917	-4.27351
sp|Q14157|UBP2L_HUMAN	UBP2L_HUMAN	UBAP2L	0.800641	0.894785	1.81296	-3.6281
sp|Q9NZ01|TECR_HUMAN	TECR_HUMAN	TECR	7.86454	2.80438	1.78406	3.78066
sp|Q6GYQ0|RGPA1_HUMAN	RGPA1_HUMAN	RALGAPA1	3.4398	1.85467	1.77925	2.28078
sp|Q5HYI7|MTX3_HUMAN	MTX3_HUMAN	MTX3	0.68313	0.826517	1.76695	-3.04513
sp|Q93008|USP9X_HUMAN	USP9X_HUMAN	USP9X	202.849	14.2425	1.73731	2.51843
sp|O15173|PGRC2_HUMAN	PGRC2_HUMAN	PGRMC2	2.46105	1.56877	1.73171	-1.47957
sp|Q8N0V3|RBFA_HUMAN	RBFA_HUMAN	RBFA	2.77961	1.66722	1.72851	2.55232
sp|O43143|DHX15_HUMAN	DHX15_HUMAN	DHX15	9.92067	3.14971	1.69186	3.44711
sp|P50990|TCPQ_HUMAN	TCPQ_HUMAN	CCT8	6.12062	2.47399	1.66742	-1.83041
sp|Q15311|RBP1_HUMAN	RBP1_HUMAN	RALBP1	18.7725	4.33272	1.66691	3.28157
sp|Q9NPL8|TIDC1_HUMAN	TIDC1_HUMAN	TIMMDC1	0	0	1.65144	2.00126
sp|O43592|XPOT_HUMAN	XPOT_HUMAN	XPOT	5.46894	2.33858	1.63097	2.26599
sp|P27816|MAP4_HUMAN	MAP4_HUMAN	MAP4	0.912871	0.955443	1.62826	-4.06401
sp|Q8TC07|TBC15_HUMAN	TBC15_HUMAN	TBC1D15	9.34216	3.05649	1.62416	3.4809
sp|P08238|HS90B_HUMAN	HS90B_HUMAN	HSP90AB1	4.03239	2.00808	1.57518	-1.67705
sp|O94813|SLIT2_HUMAN	SLIT2_HUMAN	SLIT2	14.0362	3.7465	1.54483	3.47563
sp|Q9Y2Z0|SGT1_HUMAN	SGT1_HUMAN	SUGT1	0.778499	0.882326	1.54261	-3.34944
sp|Q6P1K8|T2H2L_HUMAN;sp|Q13888|TF2H2_HUMAN	T2H2L_HUMAN	GTF2H2C	0	0	1.54216	1.29842
sp|Q96KP1|EXOC2_HUMAN	EXOC2_HUMAN	EXOC2	11.4954	3.39049	1.53556	2.56945
sp|P17812|PYRG1_HUMAN	PYRG1_HUMAN	CTPS1	8.99429	2.99905	1.53469	3.40516
sp|Q5T749|KPRP_HUMAN	KPRP_HUMAN	KPRP	0	0	1.5246	1.69983
sp|Q02224|CENPE_HUMAN	CENPE_HUMAN	CENPE	6.17368	2.48469	1.48946	2.37026
sp|Q8WXW3|PIBF1_HUMAN	PIBF1_HUMAN	PIBF1	8.13495	2.85218	1.48779	1.90518
sp|Q9NSE4|SYIM_HUMAN	SYIM_HUMAN	IARS2	0	0	1.48125	-3.91738
sp|Q9NZZ3|CHMP5_HUMAN	CHMP5_HUMAN	CHMP5	15.4937	3.93621	1.4784	2.45815
sp|O00148|DX39A_HUMAN;sp|Q13838|DX39B_HUMAN	DX39A_HUMAN	DDX39A	0	0	1.47776	1.26969
sp|Q9Y6K0|CEPT1_HUMAN	CEPT1_HUMAN	CEPT1	0	0	1.45561	2.06286
sp|Q9Y4H2|IRS2_HUMAN	IRS2_HUMAN	IRS2	45.8115	6.76842	1.45033	3.69609
sp|O14980|XPO1_HUMAN	XPO1_HUMAN	XPO1	4.75296	2.18013	1.42971	2.24733
sp|Q3ZCQ8|TIM50_HUMAN	TIM50_HUMAN	TIMM50	3.76746	1.94099	1.42681	2.45292
sp|Q13823|NOG2_HUMAN	NOG2_HUMAN	GNL2	12.4124	3.52313	1.40038	3.19762
sp|Q9NU22|MDN1_HUMAN	MDN1_HUMAN	MDN1	17.2242	4.1502	1.38781	3.63076
sp|P51610|HCFC1_HUMAN	HCFC1_HUMAN	HCFC1	0.836532	0.914621	1.37628	-3.65621
sp|Q6Y7W6|GGYF2_HUMAN	GGYF2_HUMAN	GIGYF2	2.99929	1.73185	1.37564	-2.69612
sp|O43290|SNUT1_HUMAN	SNUT1_HUMAN	SART1	33.6857	5.80394	1.37063	2.74049
sp|Q9NVP1|DDX18_HUMAN	DDX18_HUMAN	DDX18	15.8804	3.98502	1.35385	3.37199
sp|O95470|SGPL1_HUMAN	SGPL1_HUMAN	SGPL1	8.99027	2.99838	1.33565	3.1959
sp|P62081|RS7_HUMAN	RS7_HUMAN	RPS7	0	0	1.33031	-1.38122
sp|O75643|U520_HUMAN	U520_HUMAN	SNRNP200	18.1583	4.26125	1.32906	2.60049
sp|O94906|PRP6_HUMAN	PRP6_HUMAN	PRPF6	15.3688	3.92031	1.30616	3.08702
sp|Q9HCM4|E41L5_HUMAN	E41L5_HUMAN	EPB41L5	5.54662	2.35513	1.29299	2.85718
sp|Q6XZF7|DNMBP_HUMAN	DNMBP_HUMAN	DNMBP	0	0	1.28543	-1.23714
sp|P08243|ASNS_HUMAN	ASNS_HUMAN	ASNS	0	0	1.27896	1.30756
sp|O00567|NOP56_HUMAN	NOP56_HUMAN	NOP56	0.58672	0.765977	1.27759	-3.17722
sp|Q01650|LAT1_HUMAN	LAT1_HUMAN	SLC7A5	0	0	1.27145	-2.80459
sp|Q08945|SSRP1_HUMAN	SSRP1_HUMAN	SSRP1	1.35081	1.16225	1.27023	1.69167
sp|P84077|ARF1_HUMAN;sp|P61204|ARF3_HUMAN	ARF1_HUMAN	ARF1	0.712212	0.843927	1.26635	-1.71835
sp|P52789|HXK2_HUMAN	HXK2_HUMAN	HK2	1.40346	1.18468	1.23523	-3.20339
sp|Q9P258|RCC2_HUMAN	RCC2_HUMAN	RCC2	3.42142	1.84971	1.22341	1.75583
sp|P33981|TTK_HUMAN	TTK_HUMAN	TTK	4.4188	2.10209	1.22337	2.84643
sp|Q9H7Z3|NRDE2_HUMAN	NRDE2_HUMAN	NRDE2	14.0577	3.74936	1.21927	2.59936
sp|Q9Y3E5|PTH2_HUMAN	PTH2_HUMAN	PTRH2	0	0	1.20238	1.30885
sp|Q04637|IF4G1_HUMAN	IF4G1_HUMAN	EIF4G1	3.18936	1.78588	1.19197	-3.4129
sp|P55196|AFAD_HUMAN	AFAD_HUMAN	AFDN	5.55604	2.35712	1.17122	-2.96739
sp|P12270|TPR_HUMAN	TPR_HUMAN	TPR	4.47877	2.11631	1.16249	-2.3427
sp|Q8N0X7|SPG20_HUMAN	SPG20_HUMAN	SPART	1.01036	1.00517	1.1613	-2.40443
sp|Q3YEC7|RABL6_HUMAN	RABL6_HUMAN	RABL6	4.91259	2.21644	1.14138	2.41131
sp|P13639|EF2_HUMAN	EF2_HUMAN	EEF2	4.71493	2.17139	1.13622	1.50452
sp|Q86YS7|C2CD5_HUMAN	C2CD5_HUMAN	C2CD5	5.86501	2.42178	1.13266	2.57641
sp|O75410|TACC1_HUMAN	TACC1_HUMAN	TACC1	6.34335	2.5186	1.12488	3.30942
sp|O00213|APBB1_HUMAN	APBB1_HUMAN	APBB1	0.692425	0.832121	1.11925	-2.57617
sp|Q9P1Q0|VPS54_HUMAN	VPS54_HUMAN	VPS54	3.18705	1.78523	1.11502	1.30587
sp|P18621|RL17_HUMAN	RL17_HUMAN	RPL17	3.82675	1.95621	1.10633	0.732405
sp|Q86SQ0|PHLB2_HUMAN	PHLB2_HUMAN	PHLDB2	8.81687	2.96932	1.10585	2.536
sp|Q92598|HS105_HUMAN	HS105_HUMAN	HSPH1	1.3484	1.16121	1.09364	-3.35285
sp|Q92889|XPF_HUMAN	XPF_HUMAN	ERCC4	0	0	1.09132	2.43887
sp|P62249|RS16_HUMAN	RS16_HUMAN	RPS16	4.23151	2.05706	1.08252	0.969163
sp|Q9Y4W2|LAS1L_HUMAN	LAS1L_HUMAN	LAS1L	1.69166	1.30064	1.08041	1.70919
sp|Q99442|SEC62_HUMAN	SEC62_HUMAN	SEC62	7.19428	2.68222	1.07704	3.18645
sp|O75962|TRIO_HUMAN	TRIO_HUMAN	TRIO	3.36867	1.83539	1.07447	1.47557
sp|Q12816|TROP_HUMAN	TROP_HUMAN	#N/A	#N/A	#N/A	1.06857	-0.869876
sp|Q96D09|GASP2_HUMAN	GASP2_HUMAN	GPRASP2	0	0	1.06691	-1.80312
sp|P60468|SC61B_HUMAN	SC61B_HUMAN	SEC61B	3.63555	1.90671	1.06138	2.4078
sp|P06576|ATPB_HUMAN	ATPB_HUMAN	ATP5F1B	2.30905	1.51956	1.05658	-1.79683
sp|P62701|RS4X_HUMAN	RS4X_HUMAN	RPS4X	4.23996	2.05912	1.05349	1.22674
sp|Q9ULS5|TMCC3_HUMAN	TMCC3_HUMAN	TMCC3	92.2799	9.60624	1.04379	1.10558
sp|P07900|HS90A_HUMAN	HS90A_HUMAN	HSP90AA1	0	0	1.0241	-2.67863
sp|Q6ZUT1|CK057_HUMAN	CK057_HUMAN	NKAPD1	0	0	1.02045	1.72194
sp|P51571|SSRD_HUMAN	SSRD_HUMAN	SSR4	8.35316	2.89018	1.01639	1.10092
sp|Q86UP2|KTN1_HUMAN	KTN1_HUMAN	KTN1	5.07403	2.25256	0.995629	-1.48791
sp|Q9H2G2|SLK_HUMAN	SLK_HUMAN	SLK	3.35666	1.83212	0.98644	-2.84181
sp|Q7Z4H7|HAUS6_HUMAN	HAUS6_HUMAN	HAUS6	1.27455	1.12896	0.974893	-3.10374
sp|Q9NTJ3|SMC4_HUMAN	SMC4_HUMAN	SMC4	0	0	0.97427	-2.95453
sp|Q9UHN6|TMEM2_HUMAN	TMEM2_HUMAN	CEMIP2	3.08685	1.75694	0.970496	1.00193
sp|Q9Y383|LC7L2_HUMAN	LC7L2_HUMAN	LUC7L2	5.16064	2.2717	0.964228	2.62121
sp|Q96P47|AGAP3_HUMAN	AGAP3_HUMAN	AGAP3	3.67722	1.91761	0.958397	2.03786
sp|Q8TDD1|DDX54_HUMAN	DDX54_HUMAN	DDX54	5.41314	2.32661	0.954055	3.0908
sp|Q9P0K7|RAI14_HUMAN	RAI14_HUMAN	RAI14	1.24035	1.11371	0.948014	-2.62509
sp|P52429|DGKE_HUMAN	DGKE_HUMAN	DGKE	28.5064	5.33914	0.947261	1.38604
sp|P30048|PRDX3_HUMAN	PRDX3_HUMAN	PRDX3	0	0	0.94702	-1.68638
sp|P30876|RPB2_HUMAN	RPB2_HUMAN	POLR2B	2.67849	1.63661	0.945328	-2.20181
sp|Q14331|FRG1_HUMAN	FRG1_HUMAN	FRG1	6.98798	2.64348	0.944692	2.15273
sp|Q9GZR7|DDX24_HUMAN	DDX24_HUMAN	DDX24	1.33283	1.15448	0.942342	-2.52131
sp|Q8N350|CBARP_HUMAN	CBARP_HUMAN	CBARP	0	0	0.938621	1.97993
sp|Q2TBE0|C19L2_HUMAN	C19L2_HUMAN	CWF19L2	2.33218	1.52715	0.935335	1.13859
sp|P38646|GRP75_HUMAN	GRP75_HUMAN	HSPA9	0	0	0.934125	-2.45037
sp|Q9BZE4|NOG1_HUMAN	NOG1_HUMAN	GTPBP4	5.90525	2.43007	0.930737	2.64374
sp|P42224|STAT1_HUMAN	STAT1_HUMAN	STAT1	0	0	0.922931	1.28791
sp|O75691|UTP20_HUMAN	UTP20_HUMAN	UTP20	9.65534	3.1073	0.91541	2.25055
sp|Q6WKZ4|RFIP1_HUMAN	RFIP1_HUMAN	RAB11FIP1	6.79336	2.60641	0.912045	2.1924
sp|Q14683|SMC1A_HUMAN	SMC1A_HUMAN	SMC1A	7.24314	2.69131	0.899947	2.4918
sp|Q8N5K1|CISD2_HUMAN	CISD2_HUMAN	CISD2	0.761403	0.872584	0.894767	-2.15738
sp|P55010|IF5_HUMAN	IF5_HUMAN	EIF5	1.62221	1.27366	0.893132	-2.24939
sp|Q12923|PTN13_HUMAN	PTN13_HUMAN	PTPN13	10.2184	3.19662	0.890319	2.4214
sp|O75369|FLNB_HUMAN	FLNB_HUMAN	FLNB	0	0	0.885748	-2.15225
sp|P50402|EMD_HUMAN	EMD_HUMAN	EMD	0.530212	0.728156	0.878015	-1.65773
sp|P16949|STMN1_HUMAN	STMN1_HUMAN	STMN1	0	0	0.874791	-1.72119
sp|Q9HCU5|PREB_HUMAN	PREB_HUMAN	PREB	1.70681	1.30645	0.869866	-2.01881
sp|O43396|TXNL1_HUMAN	TXNL1_HUMAN	TXNL1	0	0	0.868959	-2.14105
sp|Q15417|CNN3_HUMAN	CNN3_HUMAN	CNN3	0.599145	0.774044	0.86372	-2.22639
sp|Q8IVF7|FMNL3_HUMAN	FMNL3_HUMAN	FMNL3	6.12145	2.47416	0.859412	2.2129
sp|Q13596|SNX1_HUMAN	SNX1_HUMAN	SNX1	0.926944	0.962779	0.854636	-2.30346
sp|Q16650|TBR1_HUMAN	TBR1_HUMAN	TBR1	0	0	0.849558	1.16515
sp|P21127|CD11B_HUMAN;sp|Q9UQ88|CD11A_HUMAN	CD11B_HUMAN	CDK11B	4.82446	2.19646	0.839991	1.66099
sp|P62829|RL23_HUMAN	RL23_HUMAN	RPL23	3.51976	1.8761	0.835094	0.757898
sp|P42566|EPS15_HUMAN	EPS15_HUMAN	EPS15	0	0	0.832542	-1.85077
sp|A0FGR8|ESYT2_HUMAN	ESYT2_HUMAN	ESYT2	3.60509	1.89871	0.829118	1.83712
sp|Q9NP64|NO40_HUMAN	NO40_HUMAN	ZCCHC17	2.30356	1.51775	0.828841	1.76113
sp|Q6P3W7|SCYL2_HUMAN	SCYL2_HUMAN	SCYL2	4.43296	2.10546	0.825519	2.25405
sp|P23588|IF4B_HUMAN	IF4B_HUMAN	EIF4B	0.645497	0.803428	0.819178	-1.77644
sp|P21359|NF1_HUMAN	NF1_HUMAN	NF1	5.66392	2.3799	0.819063	1.33138
sp|Q96BY7|ATG2B_HUMAN	ATG2B_HUMAN	ATG2B	1.02386	1.01186	0.813613	-2.54187
sp|Q8IWZ3|ANKH1_HUMAN	ANKH1_HUMAN	ANKHD1	2.12311	1.45709	0.811535	-3.17414
sp|Q9HAV4|XPO5_HUMAN	XPO5_HUMAN	XPO5	0	0	0.807518	0.704572
sp|O76024|WFS1_HUMAN	WFS1_HUMAN	WFS1	0	0	0.807364	0.936693
sp|Q71U36|TBA1A_HUMAN	TBA1A_HUMAN	TUBA1A	0	0	0.806034	1.59542
sp|Q9NWT8|AKIP_HUMAN	AKIP_HUMAN	AURKAIP1	0	0	0.801409	-2.37656
sp|P62861|RS30_HUMAN	RS30_HUMAN	FAU	1.46266	1.2094	0.800414	-1.00789
sp|Q9P2E9|RRBP1_HUMAN	RRBP1_HUMAN	RRBP1	2.69721	1.64232	0.799829	-3.14355
sp|P27635|RL10_HUMAN	RL10_HUMAN	RPL10	4.79229	2.18913	0.798883	0.659164
sp|Q15392|DHC24_HUMAN	DHC24_HUMAN	DHCR24	0	0	0.796731	1.19263
sp|P07437|TBB5_HUMAN	TBB5_HUMAN	TUBB	6.42554	2.53486	0.793078	0.905328
sp|Q8NEN9|PDZD8_HUMAN	PDZD8_HUMAN	PDZD8	1.04345	1.02149	0.792648	-2.44246
sp|P36542|ATPG_HUMAN	ATPG_HUMAN	ATP5F1C	3.48234	1.8661	0.787433	1.90426
sp|O15235|RT12_HUMAN	RT12_HUMAN	MRPS12	0.968939	0.984347	0.787	1.92223
sp|P28288|ABCD3_HUMAN	ABCD3_HUMAN	ABCD3	7.75237	2.78431	0.786456	-0.808522
sp|Q9Y265|RUVB1_HUMAN	RUVB1_HUMAN	RUVBL1	2.02817	1.42414	0.783573	-2.08127
sp|Q9NRA8|4ET_HUMAN	4ET_HUMAN	EIF4ENIF1	1.02323	1.01155	0.782068	-2.24962
sp|P62273|RS29_HUMAN	RS29_HUMAN	RPS29	2.83633	1.68414	0.779697	2.51752
sp|P68371|TBB4B_HUMAN	TBB4B_HUMAN	TUBB4B	6.67833	2.58425	0.777426	1.01659
sp|Q96S66|CLCC1_HUMAN	CLCC1_HUMAN	CLCC1	0.550482	0.741945	0.765924	-2.19435
sp|P78344|IF4G2_HUMAN	IF4G2_HUMAN	EIF4G2	1.15287	1.07372	0.764974	-2.24451
sp|O94991|SLIK5_HUMAN	SLIK5_HUMAN	SLITRK5	0.623206	0.789434	0.761398	-1.91228
sp|P49756|RBM25_HUMAN	RBM25_HUMAN	RBM25	5.95962	2.44123	0.760442	1.97575
sp|O00410|IPO5_HUMAN	IPO5_HUMAN	IPO5	0	0	0.760187	-1.40915
sp|Q8TEU7|RPGF6_HUMAN	RPGF6_HUMAN	RAPGEF6	0.947615	0.973455	0.756979	-2.23326
sp|Q9Y4E8|UBP15_HUMAN	UBP15_HUMAN	USP15	1.23899	1.1131	0.753163	-2.497
sp|P42695|CNDD3_HUMAN	CNDD3_HUMAN	NCAPD3	2.42265	1.55649	0.752433	1.43251
sp|Q2NL82|TSR1_HUMAN	TSR1_HUMAN	TSR1	3.19765	1.7882	0.750417	1.05551
sp|P46108|CRK_HUMAN	CRK_HUMAN	CRK	2.50177	1.5817	0.746663	-1.2738
sp|P13861|KAP2_HUMAN	KAP2_HUMAN	PRKAR2A	1.53846	1.24035	0.739724	-1.98874
sp|Q7KZF4|SND1_HUMAN	SND1_HUMAN	SND1	1.17851	1.08559	0.739489	-2.29503
sp|Q9H0A0|NAT10_HUMAN	NAT10_HUMAN	NAT10	6.15536	2.481	0.739193	2.08396
sp|O14981|BTAF1_HUMAN	BTAF1_HUMAN	BTAF1	3.64001	1.90788	0.738356	1.14548
sp|P19338|NUCL_HUMAN	NUCL_HUMAN	NCL	0.773492	0.879484	0.735827	-1.97935
sp|P52757|CHIO_HUMAN	CHIO_HUMAN	#N/A	#N/A	#N/A	0.734915	2.08332
sp|Q9Y4P8|WIPI2_HUMAN	WIPI2_HUMAN	WIPI2	0	0	0.73378	-2.03495
sp|P49207|RL34_HUMAN	RL34_HUMAN	RPL34	2.17336	1.47423	0.730678	-0.998427
sp|Q13371|PHLP_HUMAN	PHLP_HUMAN	PDCL	0.71743	0.847012	0.722659	-2.04929
sp|Q14008|CKAP5_HUMAN	CKAP5_HUMAN	CKAP5	4.00581	2.00145	0.721226	-2.70377
sp|O14964|HGS_HUMAN	HGS_HUMAN	HGS	0	0	0.719443	-1.38473
sp|P68431|H31_HUMAN;sp|Q71DI3|H32_HUMAN;sp|Q16695|H31T_HUMAN;sp|P84243|H33_HUMAN;sp|Q6NXT2|H3C_HUMAN	H31_HUMAN	HIST1H3A	0	0	0.719232	1.82531
sp|P56182|RRP1_HUMAN	RRP1_HUMAN	RRP1	4.36919	2.09026	0.718978	1.73309
sp|O95292|VAPB_HUMAN	VAPB_HUMAN	VAPB	0.937089	0.968034	0.718755	-1.64269
sp|P42356|PI4KA_HUMAN	PI4KA_HUMAN	PI4KA	2.26544	1.50514	0.71795	1.14555
sp|Q9UQ35|SRRM2_HUMAN	SRRM2_HUMAN	SRRM2	6.68945	2.5864	0.717834	2.5932
sp|Q9NVN8|GNL3L_HUMAN	GNL3L_HUMAN	GNL3L	7.35029	2.71114	0.716866	1.91064
sp|Q9H7N4|SFR19_HUMAN	SFR19_HUMAN	SCAF1	1.20348	1.09703	0.712682	1.62083
sp|Q4KMP7|TB10B_HUMAN	TB10B_HUMAN	TBC1D10B	1.60121	1.26539	0.711533	1.59755
sp|Q8IWR0|Z3H7A_HUMAN	Z3H7A_HUMAN	ZC3H7A	1.86378	1.3652	0.703086	1.10441
sp|Q2NKX8|ERC6L_HUMAN	ERC6L_HUMAN	ERCC6L	0.794835	0.891535	0.702206	-2.01127
sp|P35241|RADI_HUMAN	RADI_HUMAN	RDX	0	0	0.699778	0.806217
sp|Q5SY16|NOL9_HUMAN	NOL9_HUMAN	NOL9	0	0	0.698391	0.94438
sp|P27824|CALX_HUMAN	CALX_HUMAN	CANX	0.726014	0.852065	0.695758	-1.98679
sp|P18583|SON_HUMAN	SON_HUMAN	SON	8.91819	2.98633	0.691001	1.04469
sp|Q7L804|RFIP2_HUMAN	RFIP2_HUMAN	RAB11FIP2	6.17878	2.48572	0.690514	1.51689
sp|P46109|CRKL_HUMAN	CRKL_HUMAN	CRKL	2.66552	1.63264	0.685663	-1.25207
sp|Q9Y6M7|S4A7_HUMAN	S4A7_HUMAN	SLC4A7	2.31815	1.52255	0.685363	-2.05773
sp|P61026|RAB10_HUMAN	RAB10_HUMAN	RAB10	1.64134	1.28115	0.683533	-2.27236
sp|P13804|ETFA_HUMAN	ETFA_HUMAN	ETFA	0	0	0.683397	-1.92151
sp|Q9NZN5|ARHGC_HUMAN	ARHGC_HUMAN	ARHGEF12	0	0	0.677353	-1.43514
sp|Q4VCS5|AMOT_HUMAN	AMOT_HUMAN	AMOT	1.35798	1.16533	0.675952	-2.70521
sp|Q8IWS0|PHF6_HUMAN	PHF6_HUMAN	PHF6	1.14779	1.07135	0.672517	-1.88362
sp|Q9UPQ3|AGAP1_HUMAN	AGAP1_HUMAN	AGAP1	3.22668	1.7963	0.669989	1.67473
sp|Q06830|PRDX1_HUMAN	PRDX1_HUMAN	PRDX1	2.85031	1.68829	0.668992	0.794736
sp|O75381|PEX14_HUMAN	PEX14_HUMAN	PEX14	1.39443	1.18086	0.668056	-1.97704
sp|P05141|ADT2_HUMAN	ADT2_HUMAN	SLC25A5	4.78727	2.18798	0.66613	0.67688
sp|Q9H3N1|TMX1_HUMAN	TMX1_HUMAN	TMX1	0.914353	0.956218	0.663861	-2.03304
sp|Q99615|DNJC7_HUMAN	DNJC7_HUMAN	DNAJC7	1.11791	1.05731	0.662791	-1.6052
sp|Q7Z478|DHX29_HUMAN	DHX29_HUMAN	DHX29	1.03882	1.01922	0.659103	-1.8345
sp|Q9BXB4|OSB11_HUMAN	OSB11_HUMAN	OSBPL11	2.26062	1.50354	0.656819	1.20859
sp|Q9Y666|S12A7_HUMAN	S12A7_HUMAN	SLC12A7	0	0	0.654202	-1.57301
sp|Q9NVU7|SDA1_HUMAN	SDA1_HUMAN	SDAD1	6.05066	2.45981	0.653924	2.3411
sp|Q9H3P7|GCP60_HUMAN	GCP60_HUMAN	ACBD3	1.09233	1.04515	0.652945	-1.81264
sp|Q5THJ4|VP13D_HUMAN	VP13D_HUMAN	VPS13D	11.1567	3.34016	0.652308	2.50881
sp|Q9NRZ9|HELLS_HUMAN	HELLS_HUMAN	HELLS	2.05687	1.43418	0.652197	1.60499
sp|Q15032|R3HD1_HUMAN	R3HD1_HUMAN	R3HDM1	0	0	0.650205	-0.597761
sp|Q9ULH7|MKL2_HUMAN	MKL2_HUMAN	MRTFB	1.49338	1.22204	0.6493	-1.81501
sp|Q9HCK8|CHD8_HUMAN	CHD8_HUMAN	CHD8	1.78314	1.33534	0.648488	-2.78568
sp|Q96JH7|VCIP1_HUMAN	VCIP1_HUMAN	VCPIP1	1.41827	1.19091	0.644095	-2.40619
sp|P68363|TBA1B_HUMAN	TBA1B_HUMAN	TUBA1B	6.31253	2.51247	0.641107	0.479235
sp|Q7Z7G8|VP13B_HUMAN	VP13B_HUMAN	VPS13B	5.57439	2.36101	0.6361	1.62085
sp|P25398|RS12_HUMAN	RS12_HUMAN	RPS12	2.54079	1.59399	0.635755	1.26593
sp|P32780|TF2H1_HUMAN	TF2H1_HUMAN	GTF2H1	7.77422	2.78823	0.635383	1.06487
sp|Q9UJU6|DBNL_HUMAN	DBNL_HUMAN	DBNL	0	0	0.633875	-0.820541
sp|Q53H12|AGK_HUMAN	AGK_HUMAN	AGK	2.45176	1.56581	0.632387	1.67523
sp|Q9H2H9|S38A1_HUMAN	S38A1_HUMAN	SLC38A1	0.966092	0.9829	0.624738	-2.26257
sp|Q14318|FKBP8_HUMAN	FKBP8_HUMAN	FKBP8	3.53197	1.87935	0.624091	0.922539
sp|Q8TBA6|GOGA5_HUMAN	GOGA5_HUMAN	GOLGA5	4.62378	2.1503	0.623959	1.99833
sp|Q5C9Z4|NOM1_HUMAN	NOM1_HUMAN	NOM1	4.36581	2.08945	0.622929	1.26072
sp|P14923|PLAK_HUMAN	PLAK_HUMAN	JUP	26.9672	5.193	0.620586	1.1717
sp|P61247|RS3A_HUMAN	RS3A_HUMAN	RPS3A	4.28658	2.07041	0.619723	1.85978
sp|Q5T8D3|ACBD5_HUMAN	ACBD5_HUMAN	ACBD5	5.49547	2.34424	0.619214	1.60454
sp|O15042|SR140_HUMAN	SR140_HUMAN	U2SURP	21.6156	4.64926	0.619121	1.41214
sp|O00151|PDLI1_HUMAN	PDLI1_HUMAN	PDLIM1	1.43471	1.19779	0.618512	-1.42422
sp|P47914|RL29_HUMAN	RL29_HUMAN	RPL29	1.63995	1.2806	0.616761	-0.848918
sp|Q9UL54|TAOK2_HUMAN	TAOK2_HUMAN	TAOK2	4.73161	2.17523	0.616276	1.65168
sp|Q92997|DVL3_HUMAN	DVL3_HUMAN	DVL3	0.799543	0.894172	0.615645	-1.68852
sp|Q9H4L5|OSBL3_HUMAN	OSBL3_HUMAN	OSBPL3	4.72154	2.17291	0.615273	1.73702
sp|O60271|JIP4_HUMAN	JIP4_HUMAN	SPAG9	0	0	0.614	-1.70957
sp|P83731|RL24_HUMAN	RL24_HUMAN	RPL24	3.59822	1.8969	0.613193	-0.628051
sp|O75400|PR40A_HUMAN	PR40A_HUMAN	PRPF40A	5.04914	2.24703	0.611334	1.65444
sp|O96011|PX11B_HUMAN	PX11B_HUMAN	PEX11B	1.59091	1.26131	0.610312	-1.33964
sp|Q15070|OXA1L_HUMAN	OXA1L_HUMAN	OXA1L	0	0	0.606751	0.877095
sp|P62263|RS14_HUMAN	RS14_HUMAN	RPS14	3.39954	1.84379	0.606724	1.29655
sp|Q8IY81|SPB1_HUMAN	SPB1_HUMAN	FTSJ3	5.29798	2.30173	0.606306	1.16296
sp|Q15361|TTF1_HUMAN	TTF1_HUMAN	TTF1	1.83353	1.35408	0.601326	-1.91898
sp|Q14204|DYHC1_HUMAN	DYHC1_HUMAN	DYNC1H1	17.9502	4.23677	0.59948	1.18593
sp|Q9Y5X1|SNX9_HUMAN	SNX9_HUMAN	SNX9	10.3905	3.22343	0.596401	1.66403
sp|Q12955|ANK3_HUMAN	ANK3_HUMAN	ANK3	1.85919	1.36352	0.59635	1.12344
sp|Q9Y2X9|ZN281_HUMAN	ZN281_HUMAN	ZNF281	1.51618	1.23133	0.59615	1.31174
sp|O00541|PESC_HUMAN	PESC_HUMAN	PES1	6.48044	2.54567	0.596139	1.37008
sp|Q96C19|EFHD2_HUMAN	EFHD2_HUMAN	EFHD2	1.19271	1.09211	0.594025	-1.54661
sp|Q70CQ3|UBP30_HUMAN	UBP30_HUMAN	USP30	2.84318	1.68617	0.593292	1.43692
sp|P21397|AOFA_HUMAN	AOFA_HUMAN	MAOA	8.73073	2.95478	0.587329	2.70675
sp|P62280|RS11_HUMAN	RS11_HUMAN	RPS11	3.7425	1.93455	0.583918	1.51991
sp|Q96MW1|CCD43_HUMAN	CCD43_HUMAN	CCDC43	0	0	0.580317	-1.51087
sp|Q59GN2|R39L5_HUMAN;sp|P62891|RL39_HUMAN	R39L5_HUMAN	RPL39P5	0	0	0.576991	1.38831
sp|Q14C86|GAPD1_HUMAN	GAPD1_HUMAN	GAPVD1	1.97528	1.40545	0.576241	-2.18929
sp|Q9HB71|CYBP_HUMAN	CYBP_HUMAN	CACYBP	0.63427	0.796411	0.575942	-1.43504
sp|O60716|CTND1_HUMAN	CTND1_HUMAN	CTNND1	0.849741	0.921814	0.575833	-1.70069
sp|Q9NV70|EXOC1_HUMAN	EXOC1_HUMAN	EXOC1	14.9813	3.87057	0.573766	1.18258
sp|O95478|NSA2_HUMAN	NSA2_HUMAN	NSA2	0	0	0.566701	1.01217
sp|Q9BXK5|B2L13_HUMAN	B2L13_HUMAN	BCL2L13	3.50298	1.87163	0.56658	-0.987066
sp|O75533|SF3B1_HUMAN	SF3B1_HUMAN	SF3B1	0	0	0.563038	-1.13037
sp|Q9Y490|TLN1_HUMAN	TLN1_HUMAN	TLN1	6.33387	2.51672	0.561114	-1.75289
sp|Q9BXF6|RFIP5_HUMAN	RFIP5_HUMAN	RAB11FIP5	8.05466	2.83807	0.560133	1.51125
sp|Q68DQ2|CRBG3_HUMAN	CRBG3_HUMAN	CRYBG3	1.10298	1.05023	0.559625	-2.04915
sp|O60762|DPM1_HUMAN	DPM1_HUMAN	DPM1	1.73193	1.31603	0.559616	1.15234
sp|Q9H8Y8|GORS2_HUMAN	GORS2_HUMAN	GORASP2	0.57735	0.759836	0.558625	-1.66082
sp|O43169|CYB5B_HUMAN	CYB5B_HUMAN	CYB5B	0	0	0.557727	-1.63711
sp|Q9GZY8|MFF_HUMAN	MFF_HUMAN	MFF	2.74818	1.65776	0.556082	1.52903
sp|Q8NAN2|MIGA1_HUMAN	MIGA1_HUMAN	MIGA1	4.30651	2.07521	0.555597	2.1197
sp|Q8TCG1|CIP2A_HUMAN	CIP2A_HUMAN	CIP2A	5.34954	2.31291	0.554845	1.59488
sp|P62269|RS18_HUMAN	RS18_HUMAN	RPS18	3.60571	1.89887	0.552566	1.2377
sp|Q9NVI1|FANCI_HUMAN	FANCI_HUMAN	FANCI	1.41264	1.18855	0.552152	-1.00741
sp|P53007|TXTP_HUMAN	TXTP_HUMAN	SLC25A1	2.1177	1.45523	0.551203	1.42058
sp|Q96RL7|VP13A_HUMAN	VP13A_HUMAN	VPS13A	2.26884	1.50627	0.548748	-1.99127
sp|O75376|NCOR1_HUMAN	NCOR1_HUMAN	NCOR1	0	0	0.548714	-1.30112
sp|Q96GQ7|DDX27_HUMAN	DDX27_HUMAN	DDX27	4.11836	2.02938	0.548307	1.59998
sp|O43663|PRC1_HUMAN	PRC1_HUMAN	PRC1	0	0	0.546467	1.02766
sp|Q14694|UBP10_HUMAN	UBP10_HUMAN	USP10	1.29272	1.13698	0.545994	-1.22611
sp|Q14241|ELOA1_HUMAN	ELOA1_HUMAN	ELOA	4.61204	2.14757	0.543682	1.71919
sp|Q9Y6Y8|S23IP_HUMAN	S23IP_HUMAN	SEC23IP	0	0	0.54038	-1.30504
sp|Q9Y5K6|CD2AP_HUMAN	CD2AP_HUMAN	CD2AP	1.5737	1.25447	0.539605	-1.5951
sp|Q8TCJ2|STT3B_HUMAN	STT3B_HUMAN	STT3B	2.39676	1.54815	0.539517	1.09066
sp|O75534|CSDE1_HUMAN	CSDE1_HUMAN	CSDE1	1.93474	1.39095	0.537952	-1.83237
sp|Q9UJV9|DDX41_HUMAN	DDX41_HUMAN	DDX41	10.3775	3.22141	0.535844	1.10834
sp|P10412|H14_HUMAN	H14_HUMAN	HIST1H1E	4.84735	2.20167	0.530394	-0.935847
sp|P43307|SSRA_HUMAN	SSRA_HUMAN	SSR1	0.590134	0.768202	0.528126	-1.75311
sp|Q9ULH0|KDIS_HUMAN	KDIS_HUMAN	KIDINS220	3.54006	1.8815	0.525888	0.606136
sp|Q9P246|STIM2_HUMAN	STIM2_HUMAN	STIM2	0	0	0.520929	0.79625
sp|Q53GQ0|DHB12_HUMAN	DHB12_HUMAN	HSD17B12	4.18032	2.04458	0.515527	0.708729
sp|Q5VTE0|EF1A3_HUMAN;sp|P68104|EF1A1_HUMAN	EF1A3_HUMAN	EEF1A1P5	0	0	0.5152	0.489124
sp|Q5VZ89|DEN4C_HUMAN	DEN4C_HUMAN	DENND4C	1.55438	1.24675	0.514525	-1.77642
sp|P49792|RBP2_HUMAN	RBP2_HUMAN	RANBP2	1.17981	1.08619	0.512813	-2.24049
sp|P61513|RL37A_HUMAN	RL37A_HUMAN	RPL37A	3.24456	1.80127	0.512266	0.995343
sp|Q02790|FKBP4_HUMAN	FKBP4_HUMAN	FKBP4	0	0	0.512139	-1.17708
sp|P11171|41_HUMAN	41_HUMAN	EPB41	3.08401	1.75613	0.50834	-1.6778
sp|Q8IZH2|XRN1_HUMAN	XRN1_HUMAN	XRN1	2.89282	1.70083	0.508319	-2.06839
sp|P63173|RL38_HUMAN	RL38_HUMAN	RPL38	2.84156	1.68569	0.507032	1.2708
sp|P62847|RS24_HUMAN	RS24_HUMAN	RPS24	3.44599	1.85634	0.50561	0.692204
sp|Q03001|DYST_HUMAN	DYST_HUMAN	DST	3.71091	1.92637	0.493233	-2.02473
sp|P42766|RL35_HUMAN	RL35_HUMAN	RPL35	3.46431	1.86127	0.491495	-0.535475
sp|P50416|CPT1A_HUMAN	CPT1A_HUMAN	CPT1A	4.41534	2.10127	0.488752	1.31151
sp|Q96C57|CL043_HUMAN	CL043_HUMAN	CUSTOS	3.66519	1.91447	0.487737	1.06928
sp|O75663|TIPRL_HUMAN	TIPRL_HUMAN	TIPRL	1.45408	1.20585	0.487398	-1.16936
sp|O00483|NDUA4_HUMAN	NDUA4_HUMAN	NDUFA4	6.04984	2.45964	0.487156	1.12424
sp|Q15648|MED1_HUMAN	MED1_HUMAN	MED1	1.79624	1.34024	0.487027	0.673989
sp|P60866|RS20_HUMAN	RS20_HUMAN	RPS20	2.27445	1.50813	0.486325	1.42336
sp|Q8WYP5|ELYS_HUMAN	ELYS_HUMAN	AHCTF1	2.73791	1.65466	0.486062	0.786552
sp|Q96GA3|LTV1_HUMAN	LTV1_HUMAN	LTV1	10.9625	3.31097	0.483225	1.43435
sp|P62913|RL11_HUMAN	RL11_HUMAN	RPL11	2.74767	1.65761	0.481986	0.842681
sp|P40616|ARL1_HUMAN	ARL1_HUMAN	ARL1	1.95668	1.39881	0.481694	0.976872
sp|P17066|HSP76_HUMAN	HSP76_HUMAN	HSPA6	0	0	0.477892	-0.893923
sp|P53621|COPA_HUMAN	COPA_HUMAN	COPA	0	0	0.477824	-0.931078
sp|Q5JTW2|CEP78_HUMAN	CEP78_HUMAN	CEP78	0.614412	0.783844	0.477704	-1.54867
sp|Q6PKG0|LARP1_HUMAN	LARP1_HUMAN	LARP1	0.980196	0.990049	0.476072	-1.73551
sp|Q9UBC2|EP15R_HUMAN	EP15R_HUMAN	EPS15L1	2.65688	1.62999	0.471187	-1.2439
sp|O15027|SC16A_HUMAN	SC16A_HUMAN	SEC16A	0.747326	0.86448	0.470548	-1.25254
sp|Q14739|LBR_HUMAN	LBR_HUMAN	LBR	3.19268	1.78681	0.469513	-1.11607
sp|Q6PCB5|RSBNL_HUMAN	RSBNL_HUMAN	RSBN1L	6.71951	2.5922	0.464554	1.12639
sp|Q9UNX3|RL26L_HUMAN	RL26L_HUMAN	RPL26L1	8.25225	2.87267	0.463564	1.37776
sp|P11717|MPRI_HUMAN	MPRI_HUMAN	IGF2R	5.33762	2.31033	0.462932	1.52138
sp|P42167|LAP2B_HUMAN	LAP2B_HUMAN	TMPO	3.59989	1.89734	0.460123	-0.730728
sp|Q9UJF2|NGAP_HUMAN	NGAP_HUMAN	RASAL2	4.5946	2.1435	0.460029	1.48152
sp|Q9Y2J2|E41L3_HUMAN	E41L3_HUMAN	EPB41L3	1.92069	1.38589	0.459353	-1.24443
sp|O94826|TOM70_HUMAN	TOM70_HUMAN	TOMM70	3.20809	1.79111	0.458476	-0.969117
sp|Q9BZF3|OSBL6_HUMAN	OSBL6_HUMAN	OSBPL6	4.37519	2.0917	0.457951	1.35859
sp|P61927|RL37_HUMAN	RL37_HUMAN	RPL37	2.44654	1.56414	0.455984	1.08836
sp|Q9BWH2|FUND2_HUMAN	FUND2_HUMAN	FUNDC2	1.18408	1.08815	0.452969	-0.74444
sp|O75152|ZC11A_HUMAN	ZC11A_HUMAN	ZC3H11A	0	0	0.451491	-1.177
sp|P46781|RS9_HUMAN	RS9_HUMAN	RPS9	3.29875	1.81625	0.45129	1.16068
sp|Q96A33|CCD47_HUMAN	CCD47_HUMAN	CCDC47	3.92745	1.98178	0.450309	1.30146
sp|O00571|DDX3X_HUMAN;sp|O15523|DDX3Y_HUMAN	DDX3X_HUMAN	DDX3X	3.77215	1.9422	0.449363	1.46937
sp|P62266|RS23_HUMAN	RS23_HUMAN	RPS23	4.54284	2.13139	0.447789	0.573982
sp|Q9P031|TAP26_HUMAN	TAP26_HUMAN	CCDC59	3.76516	1.9404	0.44741	1.56145
sp|Q9HAU5|RENT2_HUMAN	RENT2_HUMAN	UPF2	11.5464	3.39799	0.447369	1.0763
sp|Q9UI10|EI2BD_HUMAN	EI2BD_HUMAN	EIF2B4	0	0	0.447079	0.831207
sp|Q96SN8|CK5P2_HUMAN	CK5P2_HUMAN	CDK5RAP2	0	0	0.445847	-1.22735
sp|Q14789|GOGB1_HUMAN	GOGB1_HUMAN	GOLGB1	13.6381	3.69299	0.443522	1.52829
sp|Q86U38|NOP9_HUMAN	NOP9_HUMAN	NOP9	1.74112	1.31952	0.44302	0.582414
sp|P49257|LMAN1_HUMAN	LMAN1_HUMAN	LMAN1	1.06907	1.03396	0.442763	-1.62128
sp|Q92900|RENT1_HUMAN	RENT1_HUMAN	UPF1	0	0	0.442556	-1.02648
sp|O15498|YKT6_HUMAN	YKT6_HUMAN	YKT6	3.76697	1.94087	0.442504	0.507161
sp|Q6UB35|C1TM_HUMAN	C1TM_HUMAN	MTHFD1L	0	0	0.441994	-1.01347
sp|Q9Y4W6|AFG32_HUMAN	AFG32_HUMAN	AFG3L2	4.02149	2.00536	0.441565	-1.24209
sp|O14641|DVL2_HUMAN	DVL2_HUMAN	DVL2	2.53851	1.59327	0.437843	-0.972873
sp|Q9ULE6|PALD_HUMAN	PALD_HUMAN	PALD1	0.870388	0.932946	0.43593	-1.43273
sp|P23396|RS3_HUMAN	RS3_HUMAN	RPS3	4.01586	2.00396	0.432711	1.1115
sp|Q9NSV4|DIAP3_HUMAN	DIAP3_HUMAN	DIAPH3	1.03805	1.01885	0.428936	-1.13003
sp|Q9Y613|FHOD1_HUMAN	FHOD1_HUMAN	FHOD1	1.24022	1.11365	0.427527	-0.755083
sp|Q2M1P5|KIF7_HUMAN	KIF7_HUMAN	KIF7	0	0	0.426254	-0.81258
sp|Q14152|EIF3A_HUMAN	EIF3A_HUMAN	EIF3A	0	0	0.424896	-0.660731
sp|P22102|PUR2_HUMAN	PUR2_HUMAN	GART	0	0	0.423215	-1.02459
sp|Q9NVH0|EXD2_HUMAN	EXD2_HUMAN	EXD2	6.18556	2.48708	0.42166	0.546158
sp|Q9HDC5|JPH1_HUMAN	JPH1_HUMAN	JPH1	5.2043	2.28129	0.421245	0.852379
sp|Q6R327|RICTR_HUMAN	RICTR_HUMAN	RICTOR	0	0	0.42119	0.791439
sp|Q02040|AK17A_HUMAN	AK17A_HUMAN	AKAP17A	3.76499	1.94036	0.421127	1.46563
sp|P55060|XPO2_HUMAN	XPO2_HUMAN	CSE1L	2.27002	1.50666	0.421116	1.01644
sp|Q9BR76|COR1B_HUMAN	COR1B_HUMAN	CORO1B	2.88988	1.69997	0.420404	-1.00175
sp|Q9Y2H6|FND3A_HUMAN	FND3A_HUMAN	FNDC3A	2.20772	1.48584	0.419116	-1.43309
sp|Q96A49|SYAP1_HUMAN	SYAP1_HUMAN	SYAP1	0.997965	0.998982	0.41742	-1.07433
sp|Q12872|SFSWA_HUMAN	SFSWA_HUMAN	SFSWAP	0	0	0.416297	-0.842899
sp|Q3V6T2|GRDN_HUMAN	GRDN_HUMAN	CCDC88A	3.12094	1.76662	0.416209	1.27864
sp|Q96HP0|DOCK6_HUMAN	DOCK6_HUMAN	DOCK6	0	0	0.41583	-1.57451
sp|Q96HC4|PDLI5_HUMAN	PDLI5_HUMAN	PDLIM5	0.859548	0.927118	0.414282	-1.13498
sp|Q9Y4P3|TBL2_HUMAN	TBL2_HUMAN	TBL2	1.01246	1.00621	0.411996	1.05837
sp|O14617|AP3D1_HUMAN	AP3D1_HUMAN	AP3D1	4.39078	2.09542	0.409023	-0.526122
sp|P08240|SRPRA_HUMAN	SRPRA_HUMAN	SRPRA	4.37435	2.09149	0.408836	1.31942
sp|P05023|AT1A1_HUMAN	AT1A1_HUMAN	ATP1A1	5.47593	2.34007	0.407715	1.13718
sp|O75179|ANR17_HUMAN	ANR17_HUMAN	ANKRD17	2.40827	1.55186	0.406434	-1.64946
sp|Q7Z434|MAVS_HUMAN	MAVS_HUMAN	MAVS	5.41103	2.32616	0.40096	-0.562504
sp|Q6ZSR9|YJ005_HUMAN	YJ005_HUMAN	FLJ45252	0	0	0.399884	-0.75449
sp|Q9Y2X3|NOP58_HUMAN	NOP58_HUMAN	NOP58	3.906	1.97636	0.39722	1.07694
sp|P78527|PRKDC_HUMAN	PRKDC_HUMAN	PRKDC	10.1022	3.1784	0.394316	1.08116
sp|P62244|RS15A_HUMAN	RS15A_HUMAN	RPS15A	0.834576	0.913551	0.393752	1.21611
sp|P61019|RAB2A_HUMAN	RAB2A_HUMAN	RAB2A	3.82014	1.95452	0.392631	1.85916
sp|P15880|RS2_HUMAN	RS2_HUMAN	RPS2	3.0428	1.74436	0.391619	0.741462
sp|Q9NS69|TOM22_HUMAN	TOM22_HUMAN	TOMM22	1.61227	1.26975	0.391575	-1.0834
sp|Q9Y2K1|ZBTB1_HUMAN	ZBTB1_HUMAN	ZBTB1	0	0	0.391552	-0.409271
sp|Q9BQG0|MBB1A_HUMAN	MBB1A_HUMAN	MYBBP1A	9.93697	3.1523	0.391249	0.514286
sp|Q6W2J9|BCOR_HUMAN	BCOR_HUMAN	BCOR	0	0	0.391225	-0.535557
sp|P49959|MRE11_HUMAN	MRE11_HUMAN	MRE11	3.60746	1.89933	0.390684	-0.829561
sp|Q66PJ3|AR6P4_HUMAN	AR6P4_HUMAN	ARL6IP4	1.12192	1.05921	0.390509	-1.19962
sp|Q07020|RL18_HUMAN	RL18_HUMAN	RPL18	0	0	0.390506	-1.06096
sp|Q9Y6B6|SAR1B_HUMAN	SAR1B_HUMAN	SAR1B	0	0	0.38587	0.830605
sp|Q9Y285|SYFA_HUMAN	SYFA_HUMAN	FARSA	3.11838	1.76589	0.384938	0.561902
sp|P06733|ENOA_HUMAN	ENOA_HUMAN	ENO1	1.55192	1.24576	0.382857	-1.02344
sp|O60645|EXOC3_HUMAN	EXOC3_HUMAN	EXOC3	0	0	0.38252	0.71718
sp|Q7Z6Z7|HUWE1_HUMAN	HUWE1_HUMAN	HUWE1	1.28201	1.13226	0.381773	-1.40583
sp|P46060|RAGP1_HUMAN	RAGP1_HUMAN	RANGAP1	1.26467	1.12458	0.381701	-1.6752
sp|P05165|PCCA_HUMAN	PCCA_HUMAN	PCCA	9.082	3.01364	0.37877	-1.69247
sp|Q6UB99|ANR11_HUMAN	ANR11_HUMAN	ANKRD11	1.29089	1.13617	0.378211	-1.5437
sp|Q13586|STIM1_HUMAN	STIM1_HUMAN	STIM1	1.59911	1.26456	0.378138	-1.26754
sp|Q8TEQ6|GEMI5_HUMAN	GEMI5_HUMAN	GEMIN5	1.51486	1.2308	0.376806	-1.45508
sp|P11274|BCR_HUMAN	BCR_HUMAN	BCR	1.2364	1.11193	0.37639	1.34222
sp|P55209|NP1L1_HUMAN	NP1L1_HUMAN	NAP1L1	0	0	0.375342	-0.995706
sp|Q9Y520|PRC2C_HUMAN	PRC2C_HUMAN	PRRC2C	1.5172	1.23175	0.372055	-1.5909
sp|Q5T6F2|UBAP2_HUMAN	UBAP2_HUMAN	UBAP2	0.717217	0.846887	0.371882	-1.11051
sp|P63241|IF5A1_HUMAN;sp|Q6IS14|IF5AL_HUMAN;sp|Q9GZV4|IF5A2_HUMAN	IF5A1_HUMAN	EIF5A	0	0	0.370959	-0.929088
sp|Q9NYV4|CDK12_HUMAN	CDK12_HUMAN	CDK12	0	0	0.369379	-0.821255
sp|P09874|PARP1_HUMAN	PARP1_HUMAN	PARP1	4.02709	2.00676	0.368901	-0.695792
sp|P53804|TTC3_HUMAN	TTC3_HUMAN	TTC3	1.19877	1.09488	0.368215	-1.10605
sp|Q13459|MYO9B_HUMAN	MYO9B_HUMAN	MYO9B	7.02953	2.65133	0.367367	1.26882
sp|Q92667|AKAP1_HUMAN	AKAP1_HUMAN	AKAP1	9.72884	3.11911	0.3641	-0.536769
sp|Q9C0C9|UBE2O_HUMAN	UBE2O_HUMAN	UBE2O	0	0	0.360552	-0.895101
sp|O95819|M4K4_HUMAN	M4K4_HUMAN	MAP4K4	3.46459	1.86134	0.359017	-1.20232
sp|Q96AG4|LRC59_HUMAN	LRC59_HUMAN	LRRC59	2.05576	1.43379	0.358837	0.676622
sp|Q12830|BPTF_HUMAN	BPTF_HUMAN	BPTF	1.58959	1.26079	0.356196	-1.00317
sp|Q969Z3|MARC2_HUMAN	MARC2_HUMAN	MARC2	2.5144	1.58569	0.355522	-0.785527
sp|Q05682|CALD1_HUMAN	CALD1_HUMAN	CALD1	1.32589	1.15147	0.355512	-1.08554
sp|P56134|ATPK_HUMAN	ATPK_HUMAN	ATP5MF	4.90165	2.21397	0.355506	0.572764
sp|Q8TD26|CHD6_HUMAN	CHD6_HUMAN	CHD6	0	0	0.350957	0.525743
sp|P12236|ADT3_HUMAN	ADT3_HUMAN	SLC25A6	5.17686	2.27527	0.350176	0.797282
sp|O95202|LETM1_HUMAN	LETM1_HUMAN	LETM1	5.07794	2.25343	0.350087	-1.1918
sp|O14976|GAK_HUMAN	GAK_HUMAN	GAK	1.16075	1.07738	0.349401	-0.995197
sp|Q9H7C9|AAMDC_HUMAN	AAMDC_HUMAN	AAMDC	0	0	0.347133	0.84532
sp|P14625|ENPL_HUMAN	ENPL_HUMAN	HSP90B1	0	0	0.346283	-0.964658
sp|P49411|EFTU_HUMAN	EFTU_HUMAN	TUFM	4.43151	2.10512	0.344529	0.644695
sp|Q9NX58|LYAR_HUMAN	LYAR_HUMAN	LYAR	5.73269	2.3943	0.344258	-0.522367
sp|Q5T9A4|ATD3B_HUMAN	ATD3B_HUMAN	#N/A	#N/A	#N/A	0.338333	0.614546
sp|Q6P996|PDXD1_HUMAN	PDXD1_HUMAN	PDXDC1	0	0	0.337914	-1.01045
sp|Q92540|SMG7_HUMAN	SMG7_HUMAN	SMG7	1.05234	1.02584	0.337637	-0.988725
sp|Q9NQC3|RTN4_HUMAN	RTN4_HUMAN	RTN4	2.35989	1.53619	0.335139	-1.19016
sp|Q9NW15|ANO10_HUMAN	ANO10_HUMAN	ANO10	0	0	0.3344	0.589911
sp|Q709C8|VP13C_HUMAN	VP13C_HUMAN	VPS13C	3.49487	1.86946	0.331062	-1.41663
sp|P02788|TRFL_HUMAN	TRFL_HUMAN	LTF	11.0047	3.31733	0.329389	0.849048
sp|Q13085|ACACA_HUMAN	ACACA_HUMAN	ACACA	23.1234	4.80868	0.328583	-0.520248
sp|Q9UHK0|NUFP1_HUMAN	NUFP1_HUMAN	NUFIP1	0	0	0.327774	0.56044
sp|O95613|PCNT_HUMAN	PCNT_HUMAN	PCNT	2.02725	1.42381	0.32763	-1.22848
sp|Q9H0S4|DDX47_HUMAN	DDX47_HUMAN	DDX47	2.50195	1.58176	0.327421	0.746266
sp|Q8NC51|PAIRB_HUMAN	PAIRB_HUMAN	SERBP1	0.574582	0.758012	0.32735	-1.0487
sp|O00400|ACATN_HUMAN	ACATN_HUMAN	SLC33A1	0	0	0.326491	-0.908887
sp|Q8IWB9|TEX2_HUMAN	TEX2_HUMAN	TEX2	1.11105	1.05407	0.326398	-0.654011
sp|Q15431|SYCP1_HUMAN	SYCP1_HUMAN	SYCP1	0	0	0.326036	0.811791
sp|P20020|AT2B1_HUMAN	AT2B1_HUMAN	ATP2B1	1.43931	1.19971	0.321716	-1.12166
sp|O94874|UFL1_HUMAN	UFL1_HUMAN	UFL1	1.72959	1.31514	0.320174	-1.06436
sp|Q9Y6A5|TACC3_HUMAN	TACC3_HUMAN	TACC3	0	0	0.318619	0.413943
sp|P29966|MARCS_HUMAN	MARCS_HUMAN	MARCKS	1.20513	1.09778	0.318365	-0.797274
sp|O60749|SNX2_HUMAN	SNX2_HUMAN	SNX2	0	0	0.317493	0.635088
sp|Q9UHQ9|NB5R1_HUMAN	NB5R1_HUMAN	CYB5R1	0.669864	0.818452	0.317434	-0.979758
sp|Q9H6T3|RPAP3_HUMAN	RPAP3_HUMAN	RPAP3	1.3756	1.17286	0.31515	-1.05638
sp|Q8IY17|PLPL6_HUMAN	PLPL6_HUMAN	PNPLA6	2.28071	1.5102	0.311307	-1.20418
sp|O00429|DNM1L_HUMAN	DNM1L_HUMAN	DNM1L	8.11077	2.84794	0.308744	0.591567
sp|P81605|DCD_HUMAN	DCD_HUMAN	DCD	5.26188	2.29388	0.305765	-0.960293
sp|Q9NVI7|ATD3A_HUMAN	ATD3A_HUMAN	ATAD3A	4.04068	2.01014	0.304313	0.840272
sp|Q8NF91|SYNE1_HUMAN	SYNE1_HUMAN	SYNE1	1.44286	1.20119	0.303819	-1.03103
sp|P23458|JAK1_HUMAN	JAK1_HUMAN	JAK1	4.70041	2.16804	0.301461	0.856013
sp|Q00341|VIGLN_HUMAN	VIGLN_HUMAN	HDLBP	4.70381	2.16883	0.299836	-1.18842
sp|P62851|RS25_HUMAN	RS25_HUMAN	RPS25	2.12082	1.4563	0.298593	0.64304
sp|Q8N2A8|PLD6_HUMAN	PLD6_HUMAN	PLD6	1.66244	1.28936	0.296813	0.71219
sp|A1X283|SPD2B_HUMAN	SPD2B_HUMAN	SH3PXD2B	1.70424	1.30547	0.294327	0.710307
sp|Q96S99|PKHF1_HUMAN	PKHF1_HUMAN	PLEKHF1	0	0	0.293224	0.626771
sp|O95721|SNP29_HUMAN	SNP29_HUMAN	SNAP29	2.68865	1.63971	0.291053	-0.78395
sp|P84098|RL19_HUMAN	RL19_HUMAN	RPL19	3.21892	1.79414	0.290964	-0.323837
sp|Q86UK7|ZN598_HUMAN	ZN598_HUMAN	ZNF598	0	0	0.290555	-0.881253
sp|Q12959|DLG1_HUMAN	DLG1_HUMAN	DLG1	1.09924	1.04845	0.290546	-0.759391
sp|Q02952|AKA12_HUMAN	AKA12_HUMAN	AKAP12	3.00802	1.73437	0.289082	-1.10583
sp|Q8WY36|BBX_HUMAN	BBX_HUMAN	BBX	3.20588	1.7905	0.288435	1.02573
sp|Q9HAD4|WDR41_HUMAN	WDR41_HUMAN	WDR41	2.7895	1.67018	0.287718	-0.92505
sp|Q00535|CDK5_HUMAN	CDK5_HUMAN	CDK5	2.52237	1.5882	0.286959	0.399075
sp|Q9UNX4|WDR3_HUMAN	WDR3_HUMAN	WDR3	1.22263	1.10573	0.286578	0.61666
sp|Q8NDI1|EHBP1_HUMAN	EHBP1_HUMAN	EHBP1	4.6815	2.16368	0.285743	-0.653132
sp|Q9H2M9|RBGPR_HUMAN	RBGPR_HUMAN	RAB3GAP2	1.45963	1.20815	0.285716	-1.16234
sp|P46779|RL28_HUMAN	RL28_HUMAN	RPL28	2.58543	1.60793	0.284242	-0.44655
sp|Q9Y217|MTMR6_HUMAN	MTMR6_HUMAN	MTMR6	1.58109	1.25741	0.283788	-0.505268
sp|P62979|RS27A_HUMAN;sp|P0CG47|UBB_HUMAN;sp|P0CG48|UBC_HUMAN	RS27A_HUMAN	RPS27A	4.57035	2.13784	0.283395	0.24964
sp|P16615|AT2A2_HUMAN	AT2A2_HUMAN	ATP2A2	7.40644	2.72148	0.281274	0.916449
sp|Q9BRS2|RIOK1_HUMAN	RIOK1_HUMAN	RIOK1	4.75741	2.18115	0.279444	0.558198
sp|Q9Y5V3|MAGD1_HUMAN	MAGD1_HUMAN	MAGED1	1.455	1.20624	0.275402	0.546598
sp|Q8IWX8|CHERP_HUMAN	CHERP_HUMAN	CHERP	1.61497	1.27081	0.275046	0.693975
sp|P08708|RS17_HUMAN	RS17_HUMAN	RPS17	0	0	0.274862	-0.823396
sp|P41440|S19A1_HUMAN	S19A1_HUMAN	SLC19A1	0	0	0.273405	-0.907834
sp|O00443|P3C2A_HUMAN	P3C2A_HUMAN	PIK3C2A	1.50021	1.22483	0.272522	-1.01697
sp|Q5T280|CI114_HUMAN	CI114_HUMAN	SPOUT1	0	0	0.271939	0.623295
sp|Q9BTX1|NDC1_HUMAN	NDC1_HUMAN	NDC1	0.81762	0.904224	0.271891	-1.03605
sp|P21333|FLNA_HUMAN	FLNA_HUMAN	FLNA	11.7603	3.42933	0.268999	-0.800086
sp|Q9ULJ7|ANR50_HUMAN	ANR50_HUMAN	ANKRD50	0	0	0.268586	0.42612
sp|Q9UJS0|CMC2_HUMAN	CMC2_HUMAN	SLC25A13	3.29052	1.81398	0.26829	0.733164
sp|Q8WW12|PCNP_HUMAN	PCNP_HUMAN	PCNP	0	0	0.268265	0.674054
sp|Q92878|RAD50_HUMAN	RAD50_HUMAN	RAD50	2.01859	1.42077	0.266665	-0.817258
sp|P29597|TYK2_HUMAN	TYK2_HUMAN	TYK2	0.762484	0.873203	0.265983	-0.906725
sp|O95486|SC24A_HUMAN	SC24A_HUMAN	SEC24A	0	0	0.265636	0.465187
sp|Q13464|ROCK1_HUMAN	ROCK1_HUMAN	ROCK1	1.19937	1.09516	0.26466	-0.787426
sp|Q16181|SEPT7_HUMAN	SEPT7_HUMAN	SEPTIN7	0	0	0.26185	0.36986
sp|P12273|PIP_HUMAN	PIP_HUMAN	PIP	7.87771	2.80673	0.261419	0.79716
sp|P07355|ANXA2_HUMAN;sp|A6NMY6|AXA2L_HUMAN	ANXA2_HUMAN	ANXA2	0	0	0.260709	-0.690874
sp|Q12797|ASPH_HUMAN	ASPH_HUMAN	ASPH	0	0	0.26033	0.453679
sp|P07305|H10_HUMAN	H10_HUMAN	H1F0	0	0	0.257232	-0.934486
sp|Q9NYJ8|TAB2_HUMAN	TAB2_HUMAN	TAB2	0	0	0.256405	-0.550402
sp|Q5T8P6|RBM26_HUMAN	RBM26_HUMAN	RBM26	1.15151	1.07308	0.256097	0.652548
sp|P17480|UBF1_HUMAN	UBF1_HUMAN	UBTF	2.01727	1.42031	0.256085	-0.664376
sp|Q9UM54|MYO6_HUMAN	MYO6_HUMAN	MYO6	1.37769	1.17375	0.255598	0.707223
sp|O15440|MRP5_HUMAN	MRP5_HUMAN	ABCC5	1.17053	1.08191	0.254936	-0.647614
sp|P53365|ARFP2_HUMAN	ARFP2_HUMAN	ARFIP2	0	0	0.253877	0.478927
sp|Q96CS3|FAF2_HUMAN	FAF2_HUMAN	FAF2	2.83213	1.68289	0.253362	0.633654
sp|P15311|EZRI_HUMAN	EZRI_HUMAN	EZR	0.806505	0.898056	0.252313	-0.705708
sp|Q14974|IMB1_HUMAN	IMB1_HUMAN	KPNB1	0.956081	0.977794	0.251531	-0.770787
sp|Q9Y5M8|SRPRB_HUMAN	SRPRB_HUMAN	SRPRB	0	0	0.249632	-0.913814
sp|Q9Y2I1|NISCH_HUMAN	NISCH_HUMAN	NISCH	0	0	0.249236	-0.750322
sp|P08195|4F2_HUMAN	4F2_HUMAN	SLC3A2	4.86489	2.20565	0.248829	-0.407884
sp|P04843|RPN1_HUMAN	RPN1_HUMAN	RPN1	6.6551	2.57975	0.248819	-0.753694
sp|Q6P1L8|RM14_HUMAN	RM14_HUMAN	MRPL14	0	0	0.248791	0.354346
sp|P61254|RL26_HUMAN	RL26_HUMAN	RPL26	5.29795	2.30173	0.248615	-0.36325
sp|P62258|1433E_HUMAN	1433E_HUMAN	YWHAE	1.59529	1.26305	0.247992	0.632061
sp|O75694|NU155_HUMAN	NU155_HUMAN	NUP155	1.25562	1.12054	0.247751	-0.931364
sp|P46776|RL27A_HUMAN	RL27A_HUMAN	RPL27A	3.17898	1.78297	0.247326	-0.332752
sp|P11586|C1TC_HUMAN	C1TC_HUMAN	MTHFD1	2.15095	1.46661	0.243835	-0.799809
sp|Q14160|SCRIB_HUMAN	SCRIB_HUMAN	SCRIB	1.14825	1.07156	0.242727	-0.850487
sp|P46821|MAP1B_HUMAN	MAP1B_HUMAN	MAP1B	1.31516	1.1468	0.241177	-1.09425
sp|P18124|RL7_HUMAN	RL7_HUMAN	RPL7	0	0	0.240556	0.504784
sp|Q04721|NOTC2_HUMAN	NOTC2_HUMAN	NOTCH2	0	0	0.240277	-0.759832
sp|Q13428|TCOF_HUMAN	TCOF_HUMAN	TCOF1	10.6847	3.26874	0.239606	0.366826
sp|P42704|LPPRC_HUMAN	LPPRC_HUMAN	LRPPRC	3.55626	1.88581	0.238273	-1.04016
sp|Q8TAA9|VANG1_HUMAN	VANG1_HUMAN	VANGL1	1.46532	1.2105	0.237494	-0.603638
sp|P22392|NDKB_HUMAN;sp|O60361|NDK8_HUMAN	NDKB_HUMAN	NME2	0	0	0.237352	-0.759846
sp|Q02878|RL6_HUMAN	RL6_HUMAN	RPL6	0	0	0.237185	-0.737742
sp|Q8TEV9|SMCR8_HUMAN	SMCR8_HUMAN	SMCR8	2.13255	1.46032	0.236837	-1.0598
sp|Q86XI2|CNDG2_HUMAN	CNDG2_HUMAN	NCAPG2	2.41319	1.55345	0.236188	0.439472
sp|Q08378|GOGA3_HUMAN	GOGA3_HUMAN	GOLGA3	1.30531	1.1425	0.234966	0.571586
sp|Q9BVP2|GNL3_HUMAN	GNL3_HUMAN	GNL3	9.80813	3.13179	0.234002	0.259861
sp|Q15942|ZYX_HUMAN	ZYX_HUMAN	ZYX	0	0	0.231821	0.599633
sp|P49790|NU153_HUMAN	NU153_HUMAN	NUP153	1.24887	1.11753	0.230309	-1.0059
sp|Q12965|MYO1E_HUMAN	MYO1E_HUMAN	MYO1E	0.904868	0.951245	0.230097	0.468157
sp|P35611|ADDA_HUMAN	ADDA_HUMAN	ADD1	3.60095	1.89762	0.226788	0.717448
sp|O14966|RAB7L_HUMAN	RAB7L_HUMAN	RAB29	1.34267	1.15874	0.225286	-0.650404
sp|P11498|PYC_HUMAN	PYC_HUMAN	PC	15.2755	3.90839	0.224757	-0.418301
sp|Q9BPX6|MICU1_HUMAN	MICU1_HUMAN	MICU1	4.13441	2.03332	0.220361	0.585893
sp|P53597|SUCA_HUMAN	SUCA_HUMAN	SUCLG1	0	0	0.219009	-0.465214
sp|O14795|UN13B_HUMAN	UN13B_HUMAN	UNC13B	0	0	0.218909	-0.467519
sp|Q8NBN3|TM87A_HUMAN	TM87A_HUMAN	TMEM87A	0.974825	0.987332	0.217491	-0.787341
sp|Q9UER7|DAXX_HUMAN	DAXX_HUMAN	DAXX	3.61101	1.90027	0.216141	0.671641
sp|Q9Y2U8|MAN1_HUMAN	MAN1_HUMAN	LEMD3	1.81687	1.34791	0.215696	-0.700622
sp|Q5XPI4|RN123_HUMAN	RN123_HUMAN	RNF123	0	0	0.215431	-0.535325
sp|Q15643|TRIPB_HUMAN	TRIPB_HUMAN	TRIP11	8.37032	2.89315	0.215409	0.950366
sp|Q5JRA6|MIA3_HUMAN	MIA3_HUMAN	MIA3	1.57875	1.25648	0.215376	-0.761515
sp|Q9UBM7|DHCR7_HUMAN	DHCR7_HUMAN	DHCR7	2.16324	1.4708	0.214094	-0.703758
sp|Q96AY4|TTC28_HUMAN	TTC28_HUMAN	TTC28	5.04344	2.24576	0.21374	-1.02225
sp|P01876|IGHA1_HUMAN	IGHA1_HUMAN	IGHA1	6.0984	2.46949	0.213504	0.614523
sp|Q9NZ45|CISD1_HUMAN	CISD1_HUMAN	CISD1	2.89987	1.7029	0.212812	0.465605
sp|Q15233|NONO_HUMAN	NONO_HUMAN	NONO	0	0	0.211706	-0.752602
sp|P25705|ATPA_HUMAN	ATPA_HUMAN	ATP5F1A	3.01808	1.73726	0.211173	0.65259
sp|P62910|RL32_HUMAN	RL32_HUMAN	RPL32	2.68947	1.63996	0.210133	0.54963
sp|Q8NBU5|ATAD1_HUMAN	ATAD1_HUMAN	ATAD1	0	0	0.208268	-0.356556
sp|Q00325|MPCP_HUMAN	MPCP_HUMAN	SLC25A3	4.74449	2.17818	0.206726	0.426794
sp|P61353|RL27_HUMAN	RL27_HUMAN	RPL27	0.590134	0.768202	0.205267	-0.645394
sp|P51617|IRAK1_HUMAN	IRAK1_HUMAN	IRAK1	0.878561	0.937316	0.20513	-0.571854
sp|P26373|RL13_HUMAN	RL13_HUMAN	RPL13	2.90627	1.70478	0.204067	-0.300785
sp|Q92968|PEX13_HUMAN	PEX13_HUMAN	PEX13	1.03831	1.01897	0.203803	-0.436112
sp|Q9HCC0|MCCB_HUMAN	MCCB_HUMAN	MCCC2	2.73219	1.65293	0.201953	-0.367636
sp|Q8NI27|THOC2_HUMAN	THOC2_HUMAN	THOC2	8.54471	2.92313	0.201013	0.734643
sp|Q5HYI8|RABL3_HUMAN	RABL3_HUMAN	RABL3	0.57327	0.757146	0.200825	-0.705672
sp|O94762|RECQ5_HUMAN	RECQ5_HUMAN	#N/A	#N/A	#N/A	0.200452	0.831507
sp|O95391|SLU7_HUMAN	SLU7_HUMAN	SLU7	2.81109	1.67663	0.200059	-0.361327
sp|Q9UGP8|SEC63_HUMAN	SEC63_HUMAN	SEC63	7.17269	2.67819	0.198016	0.689939
sp|Q8IYB3|SRRM1_HUMAN	SRRM1_HUMAN	SRRM1	4.6827	2.16396	0.197497	0.806985
sp|P68133|ACTS_HUMAN;sp|P68032|ACTC_HUMAN;sp|P63267|ACTH_HUMAN;sp|P62736|ACTA_HUMAN	ACTS_HUMAN	#N/A	#N/A	#N/A	0.197166	-0.484288
sp|P0DMV9|HS71B_HUMAN;sp|P0DMV8|HS71A_HUMAN	HS71B_HUMAN	HSPA1B	0	0	0.196288	-0.424488
sp|Q9BQ48|RM34_HUMAN	RM34_HUMAN	MRPL34	0	0	0.196283	-0.622795
sp|P32121|ARRB2_HUMAN	ARRB2_HUMAN	ARRB2	6.06145	2.462	0.195831	0.638657
sp|P37802|TAGL2_HUMAN	TAGL2_HUMAN	TAGLN2	3.7583	1.93863	0.195513	0.396844
sp|Q8N9N7|LRC57_HUMAN	LRC57_HUMAN	LRRC57	0	0	0.195154	-0.449757
sp|P09543|CN37_HUMAN	CN37_HUMAN	CNP	1.51022	1.22891	0.19481	-0.469394
sp|Q71UM5|RS27L_HUMAN	RS27L_HUMAN	RPS27L	0	0	0.194596	0.871883
sp|Q13625|ASPP2_HUMAN	ASPP2_HUMAN	TP53BP2	0	0	0.194491	-0.56654
sp|Q92616|GCN1_HUMAN	GCN1_HUMAN	GCN1	4.29549	2.07256	0.194417	0.701974
sp|P42694|HELZ_HUMAN	HELZ_HUMAN	HELZ	0	0	0.193826	-0.578269
sp|Q5SVZ6|ZMYM1_HUMAN	ZMYM1_HUMAN	ZMYM1	4.86156	2.20489	0.193796	0.694492
sp|P09884|DPOLA_HUMAN	DPOLA_HUMAN	POLA1	0	0	0.192736	-0.27156
sp|O75976|CBPD_HUMAN	CBPD_HUMAN	CPD	1.4666	1.21103	0.191704	-0.716693
sp|O14523|C2C2L_HUMAN	C2C2L_HUMAN	C2CD2L	0	0	0.191453	0.308779
sp|Q12789|TF3C1_HUMAN	TF3C1_HUMAN	GTF3C1	0	0	0.189563	0.394996
sp|Q13439|GOGA4_HUMAN	GOGA4_HUMAN	GOLGA4	9.32118	3.05306	0.187604	1.01412
sp|P47712|PA24A_HUMAN	PA24A_HUMAN	PLA2G4A	1.86583	1.36595	0.186686	0.562428
sp|P52292|IMA1_HUMAN	IMA1_HUMAN	KPNA2	1.96028	1.4001	0.186457	-0.489536
sp|Q7Z5P9|MUC19_HUMAN	MUC19_HUMAN	MUC19	0	0	0.186193	-1.00424
sp|P62805|H4_HUMAN	H4_HUMAN	HIST1H4A	0	0	0.185685	-0.565675
sp|Q9UEY8|ADDG_HUMAN	ADDG_HUMAN	ADD3	1.69755	1.3029	0.183742	0.57996
sp|O75431|MTX2_HUMAN	MTX2_HUMAN	MTX2	0	0	0.183505	0.47308
sp|P50747|BPL1_HUMAN	BPL1_HUMAN	HLCS	0.946001	0.972626	0.183297	-0.571214
sp|Q9GZS1|RPA49_HUMAN	RPA49_HUMAN	POLR1E	3.6298	1.9052	0.182329	0.399868
sp|Q9UNF1|MAGD2_HUMAN	MAGD2_HUMAN	MAGED2	1.41665	1.19023	0.181822	0.55833
sp|Q5SW79|CE170_HUMAN	CE170_HUMAN	CEP170	2.83208	1.68288	0.180927	-0.82611
sp|P83881|RL36A_HUMAN	RL36A_HUMAN	RPL36A	5.55879	2.35771	0.177108	-0.240893
sp|O60343|TBCD4_HUMAN	TBCD4_HUMAN	TBC1D4	0	0	0.176435	-0.487761
sp|O60841|IF2P_HUMAN	IF2P_HUMAN	EIF5B	4.8212	2.19572	0.17625	0.600046
sp|Q63HN8|RN213_HUMAN	RN213_HUMAN	RNF213	1.1984	1.09472	0.175743	-0.503439
sp|Q6P2Q9|PRP8_HUMAN	PRP8_HUMAN	PRPF8	3.39993	1.84389	0.175689	-0.542017
sp|Q92522|H1X_HUMAN	H1X_HUMAN	H1FX	1.28259	1.13251	0.174673	-0.648913
sp|Q9NX40|OCAD1_HUMAN	OCAD1_HUMAN	OCIAD1	3.2682	1.80782	0.174531	0.459011
sp|P62826|RAN_HUMAN	RAN_HUMAN	RAN	0	0	0.174334	0.559456
sp|Q9UKJ3|GPTC8_HUMAN	GPTC8_HUMAN	GPATCH8	0	0	0.173342	0.299665
sp|Q5T3I0|GPTC4_HUMAN	GPTC4_HUMAN	GPATCH4	3.6273	1.90455	0.173214	0.502023
sp|Q15058|KIF14_HUMAN	KIF14_HUMAN	KIF14	1.37957	1.17455	0.17179	-0.821879
sp|Q9BZF9|UACA_HUMAN	UACA_HUMAN	UACA	3.89233	1.9729	0.171126	0.606813
sp|P11532|DMD_HUMAN	DMD_HUMAN	DMD	0	0	0.171082	0.550921
sp|Q14980|NUMA1_HUMAN	NUMA1_HUMAN	NUMA1	3.35794	1.83247	0.170576	0.74594
sp|O75190|DNJB6_HUMAN	DNJB6_HUMAN	DNAJB6	0	0	0.169842	0.411459
sp|O00264|PGRC1_HUMAN	PGRC1_HUMAN	PGRMC1	0	0	0.168621	-0.516624
sp|Q96AG3|S2546_HUMAN	S2546_HUMAN	SLC25A46	0	0	0.168579	-0.47439
sp|Q9P0L0|VAPA_HUMAN	VAPA_HUMAN	VAPA	1.26253	1.12362	0.168152	0.546762
sp|P61081|UBC12_HUMAN	UBC12_HUMAN	UBE2M	0.883461	0.939926	0.167121	-0.530895
sp|O75915|PRAF3_HUMAN	PRAF3_HUMAN	ARL6IP5	0.868849	0.932121	0.167067	-0.446564
sp|Q5VT06|CE350_HUMAN	CE350_HUMAN	CEP350	1.28477	1.13348	0.166516	-0.493296
sp|P35579|MYH9_HUMAN	MYH9_HUMAN	MYH9	7.66295	2.7682	0.166329	0.66793
sp|Q15836|VAMP3_HUMAN	VAMP3_HUMAN	VAMP3	0.738789	0.859528	0.164706	-0.48996
sp|P49458|SRP09_HUMAN	SRP09_HUMAN	SRP9	0	0	0.164422	0.343322
sp|Q96HE9|PRR11_HUMAN	PRR11_HUMAN	PRR11	2.98294	1.72712	0.162998	0.410198
sp|P26641|EF1G_HUMAN	EF1G_HUMAN	EEF1G	0	0	0.162272	-0.331622
sp|Q86UE4|LYRIC_HUMAN	LYRIC_HUMAN	MTDH	1.93034	1.38937	0.162059	-0.552035
sp|Q00005|2ABB_HUMAN;sp|P63151|2ABA_HUMAN;sp|Q66LE6|2ABD_HUMAN	2ABB_HUMAN	#N/A	#N/A	#N/A	0.160925	-0.255086
sp|Q658Y4|F91A1_HUMAN	F91A1_HUMAN	FAM91A1	1.32533	1.15123	0.160542	-0.673996
sp|Q9UEW8|STK39_HUMAN	STK39_HUMAN	STK39	3.22605	1.79612	0.160345	-0.216278
sp|Q5JTV8|TOIP1_HUMAN	TOIP1_HUMAN	TOR1AIP1	2.112	1.45327	0.159276	-0.412916
sp|O95347|SMC2_HUMAN	SMC2_HUMAN	SMC2	2.82011	1.67932	0.158689	0.345497
sp|Q8N3C0|ASCC3_HUMAN	ASCC3_HUMAN	ASCC3	1.55915	1.24866	0.157738	-0.624252
sp|P51648|AL3A2_HUMAN	AL3A2_HUMAN	ALDH3A2	3.48102	1.86575	0.15651	-0.168831
sp|Q8ND24|RN214_HUMAN	RN214_HUMAN	RNF214	0	0	0.155475	-0.234101
sp|P57772|SELB_HUMAN	SELB_HUMAN	EEFSEC	12.0779	3.47533	0.154002	0.581837
sp|Q8WXH0|SYNE2_HUMAN	SYNE2_HUMAN	SYNE2	3.86004	1.9647	0.152198	-0.854976
sp|Q96P70|IPO9_HUMAN	IPO9_HUMAN	IPO9	2.69682	1.6422	0.152012	-0.328133
sp|Q7Z3T8|ZFY16_HUMAN	ZFY16_HUMAN	ZFYVE16	0	0	0.151383	-0.371231
sp|Q9UG63|ABCF2_HUMAN	ABCF2_HUMAN	ABCF2	3.06935	1.75196	0.15038	0.556013
sp|Q96QD8|S38A2_HUMAN	S38A2_HUMAN	SLC38A2	1.53712	1.23981	0.149254	0.605794
sp|Q8WTT2|NOC3L_HUMAN	NOC3L_HUMAN	NOC3L	4.15373	2.03807	0.149073	0.452456
sp|O95232|LC7L3_HUMAN	LC7L3_HUMAN	LUC7L3	2.85822	1.69063	0.148192	0.420185
sp|Q8WVS4|WDR60_HUMAN	WDR60_HUMAN	WDR60	3.5871	1.89397	0.147528	0.495563
sp|Q9H2J7|S6A15_HUMAN	S6A15_HUMAN	SLC6A15	3.60877	1.89968	0.146884	-0.292199
sp|Q99755|PI51A_HUMAN	PI51A_HUMAN	PIP5K1A	4.59182	2.14285	0.146346	0.477814
sp|P12004|PCNA_HUMAN	PCNA_HUMAN	PCNA	1.89756	1.37752	0.14569	-0.326063
sp|Q8IWV7|UBR1_HUMAN	UBR1_HUMAN	UBR1	0	0	0.145678	0.2082
sp|Q8IXI1|MIRO2_HUMAN	MIRO2_HUMAN	RHOT2	2.69365	1.64123	0.144025	0.538597
sp|Q9NWB6|ARGL1_HUMAN	ARGL1_HUMAN	ARGLU1	5.04427	2.24594	0.142145	-0.564176
sp|P27708|PYR1_HUMAN	PYR1_HUMAN	CAD	7.39206	2.71883	0.141419	0.501654
sp|Q7Z6K5|ARPIN_HUMAN	ARPIN_HUMAN	ARPIN	1.19271	1.09211	0.141085	-0.515819
sp|Q09666|AHNK_HUMAN	AHNK_HUMAN	AHNAK	9.16309	3.02706	0.140103	0.538798
sp|P62277|RS13_HUMAN	RS13_HUMAN	RPS13	2.21876	1.48955	0.138844	-0.468743
sp|P05556|ITB1_HUMAN	ITB1_HUMAN	ITGB1	2.74711	1.65744	0.138452	-0.600235
sp|Q16891|MIC60_HUMAN	MIC60_HUMAN	IMMT	1.20185	1.09629	0.138028	0.448564
sp|Q9BSD7|NTPCR_HUMAN	NTPCR_HUMAN	NTPCR	0	0	0.135794	-0.301221
sp|Q07157|ZO1_HUMAN	ZO1_HUMAN	TJP1	2.13438	1.46095	0.129792	0.293164
sp|Q9BXS9|S26A6_HUMAN	S26A6_HUMAN	SLC26A6	1.44605	1.20252	0.127916	-0.339477
sp|P49815|TSC2_HUMAN	TSC2_HUMAN	TSC2	0	0	0.127131	-0.259933
sp|Q9BQA1|MEP50_HUMAN	MEP50_HUMAN	WDR77	1.41163	1.18812	0.124967	-0.340538
sp|P78347|GTF2I_HUMAN	GTF2I_HUMAN	GTF2I	0	0	0.124049	-0.36695
sp|Q9UNY4|TTF2_HUMAN	TTF2_HUMAN	TTF2	0	0	0.121791	-0.362797
sp|Q15042|RB3GP_HUMAN	RB3GP_HUMAN	RAB3GAP1	1.28962	1.13561	0.121455	-0.539986
sp|P62750|RL23A_HUMAN	RL23A_HUMAN	RPL23A	4.21616	2.05333	0.121288	0.158686
sp|P25205|MCM3_HUMAN	MCM3_HUMAN	MCM3	4.31028	2.07612	0.120587	0.348089
sp|Q9P035|HACD3_HUMAN	HACD3_HUMAN	HACD3	4.37813	2.0924	0.120425	0.17709
sp|Q8IXI2|MIRO1_HUMAN	MIRO1_HUMAN	RHOT1	0	0	0.119125	0.2517
sp|Q5VT25|MRCKA_HUMAN	MRCKA_HUMAN	CDC42BPA	2.02593	1.42335	0.118853	0.471726
sp|B2RTY4|MYO9A_HUMAN	MYO9A_HUMAN	MYO9A	4.05562	2.01386	0.11615	0.431712
sp|O95487|SC24B_HUMAN	SC24B_HUMAN	SEC24B	0	0	0.113782	-0.357157
sp|Q9NRP0|OSTC_HUMAN	OSTC_HUMAN	#N/A	#N/A	#N/A	0.112267	-0.129351
sp|P45880|VDAC2_HUMAN	VDAC2_HUMAN	VDAC2	1.19269	1.0921	0.111745	-0.454244
sp|P28340|DPOD1_HUMAN	DPOD1_HUMAN	POLD1	0	0	0.11118	0.269134
sp|Q7Z6J0|SH3R1_HUMAN	SH3R1_HUMAN	SH3RF1	0	0	0.110335	-0.224669
sp|Q9NQC7|CYLD_HUMAN	CYLD_HUMAN	CYLD	0	0	0.108506	0.32167
sp|Q07960|RHG01_HUMAN	RHG01_HUMAN	ARHGAP1	3.43448	1.85324	0.108387	-0.580841
sp|P62899|RL31_HUMAN	RL31_HUMAN	RPL31	0	0	0.108317	0.227493
sp|Q14684|RRP1B_HUMAN	RRP1B_HUMAN	RRP1B	6.0529	2.46026	0.107894	0.199833
sp|Q7L0Y3|MRRP1_HUMAN	MRRP1_HUMAN	TRMT10C	0	0	0.107536	-0.256365
sp|Q15208|STK38_HUMAN	STK38_HUMAN	STK38	0	0	0.10747	-0.355975
sp|Q9Y3C1|NOP16_HUMAN	NOP16_HUMAN	NOP16	1.04417	1.02185	0.106864	-0.312058
sp|Q8IWC1|MA7D3_HUMAN	MA7D3_HUMAN	MAP7D3	1.50478	1.2267	0.106479	0.387671
sp|Q969Q0|RL36L_HUMAN	RL36L_HUMAN	RPL36AL	3.91248	1.978	0.103965	0.390493
sp|P15924|DESP_HUMAN	DESP_HUMAN	DSP	10.1037	3.17864	0.10253	-0.478156
sp|P61978|HNRPK_HUMAN	HNRPK_HUMAN	HNRNPK	0.585779	0.765362	0.101005	-0.351115
sp|Q13523|PRP4B_HUMAN	PRP4B_HUMAN	PRPF4B	8.92125	2.98685	0.100472	-0.350045
sp|P19367|HXK1_HUMAN	HXK1_HUMAN	HK1	8.51187	2.91751	0.0985487	-0.38036
sp|Q96RQ3|MCCA_HUMAN	MCCA_HUMAN	MCCC1	7.71941	2.77838	0.0981993	-0.33883
sp|Q9Y2W6|TDRKH_HUMAN	TDRKH_HUMAN	TDRKH	4.43245	2.10534	0.0964221	0.162964
sp|Q9Y3U8|RL36_HUMAN	RL36_HUMAN	RPL36	1.45182	1.20491	0.0962624	-0.252653
sp|P62820|RAB1A_HUMAN	RAB1A_HUMAN	RAB1A	1.81419	1.34692	0.0957	-0.285699
sp|Q92574|TSC1_HUMAN	TSC1_HUMAN	TSC1	1.31143	1.14518	0.095648	0.263565
sp|Q96A65|EXOC4_HUMAN	EXOC4_HUMAN	EXOC4	3.67398	1.91676	0.0953186	-0.337855
sp|Q96R06|SPAG5_HUMAN	SPAG5_HUMAN	SPAG5	2.27606	1.50866	0.0950251	0.318038
sp|Q9UBP9|GULP1_HUMAN	GULP1_HUMAN	GULP1	0	0	0.0944468	0.282866
sp|P57088|TMM33_HUMAN	TMM33_HUMAN	TMEM33	0	0	0.0943245	0.234833
sp|P62753|RS6_HUMAN	RS6_HUMAN	RPS6	5.35671	2.31446	0.0937392	0.12201
sp|P61626|LYSC_HUMAN	LYSC_HUMAN	LYZ	3.29202	1.81439	0.0937267	0.349734
sp|Q9HCL2|GPAT1_HUMAN	GPAT1_HUMAN	GPAM	5.46372	2.33746	0.0936442	-0.328028
sp|Q96EY4|TMA16_HUMAN	TMA16_HUMAN	TMA16	0	0	0.0916354	-0.358192
sp|P50851|LRBA_HUMAN	LRBA_HUMAN	LRBA	6.28446	2.50688	0.0910668	0.465464
sp|Q9H3U1|UN45A_HUMAN	UN45A_HUMAN	UNC45A	3.91459	1.97853	0.0909382	0.426298
sp|Q02978|M2OM_HUMAN	M2OM_HUMAN	SLC25A11	3.28747	1.81314	0.09075	0.249495
sp|Q9NZM3|ITSN2_HUMAN	ITSN2_HUMAN	ITSN2	0	0	0.0904087	0.229347
sp|P49757|NUMB_HUMAN	NUMB_HUMAN	NUMB	2.89307	1.7009	0.0898592	0.318741
sp|Q9Y5A9|YTHD2_HUMAN	YTHD2_HUMAN	YTHDF2	0	0	0.0887882	-0.233014
sp|Q9BYG3|MK67I_HUMAN	MK67I_HUMAN	NIFK	4.61854	2.14908	0.0882901	0.151957
sp|Q8IZA0|K319L_HUMAN	K319L_HUMAN	KIAA0319L	0	0	0.0869411	0.253949
sp|Q8NE71|ABCF1_HUMAN	ABCF1_HUMAN	ABCF1	3.93233	1.98301	0.0863636	0.199175
sp|Q86XL3|ANKL2_HUMAN	ANKL2_HUMAN	ANKLE2	0.983569	0.99175	0.086111	-0.289811
sp|P46782|RS5_HUMAN	RS5_HUMAN	RPS5	4.91566	2.21713	0.0829026	0.316661
sp|P48735|IDHP_HUMAN	IDHP_HUMAN	IDH2	0	0	0.0828193	0.154201
sp|O95573|ACSL3_HUMAN	ACSL3_HUMAN	ACSL3	1.8453	1.35842	0.0825628	0.325923
sp|O95373|IPO7_HUMAN	IPO7_HUMAN	IPO7	3.55786	1.88623	0.0821414	0.39185
sp|P35268|RL22_HUMAN	RL22_HUMAN	RPL22	1.04068	1.02014	0.081354	0.331296
sp|O43175|SERA_HUMAN	SERA_HUMAN	PHGDH	1.09402	1.04596	0.0799335	0.250749
sp|Q14839|CHD4_HUMAN	CHD4_HUMAN	CHD4	4.27684	2.06805	0.0798211	0.32517
sp|Q9BU76|MMTA2_HUMAN	MMTA2_HUMAN	MMTAG2	3.25518	1.80421	0.0796711	0.129167
sp|Q9UBF2|COPG2_HUMAN	COPG2_HUMAN	COPG2	2.54914	1.5966	0.0793844	-0.304479
sp|P24928|RPB1_HUMAN	RPB1_HUMAN	POLR2A	4.34745	2.08505	0.0784394	0.347465
sp|Q9Y6M5|ZNT1_HUMAN	ZNT1_HUMAN	SLC30A1	2.00091	1.41454	0.0782393	-0.211805
sp|Q92575|UBXN4_HUMAN	UBXN4_HUMAN	UBXN4	3.4171	1.84854	0.0781654	-0.189312
sp|Q70E73|RAPH1_HUMAN	RAPH1_HUMAN	RAPH1	0.808793	0.899329	0.0778385	-0.283619
sp|Q9H501|ESF1_HUMAN	ESF1_HUMAN	ESF1	0	0	0.0764977	0.203766
sp|Q07820|MCL1_HUMAN	MCL1_HUMAN	MCL1	4.23105	2.05695	0.0761343	-0.223637
sp|O75116|ROCK2_HUMAN	ROCK2_HUMAN	ROCK2	1.85906	1.36347	0.0753498	0.238402
sp|Q15907|RB11B_HUMAN	RB11B_HUMAN	RAB11B	0	0	0.0750106	0.421781
sp|O43670|ZN207_HUMAN	ZN207_HUMAN	ZNF207	0	0	0.0747736	0.1545
sp|Q96LT7|CI072_HUMAN	CI072_HUMAN	C9orf72	0	0	0.0739068	-0.147086
sp|Q9P2D6|F135A_HUMAN	F135A_HUMAN	FAM135A	1.71573	1.30986	0.0730678	-0.240513
sp|Q8N5G2|MACOI_HUMAN	MACOI_HUMAN	MACO1	0	0	0.0725193	-0.226439
sp|Q9UPQ9|TNR6B_HUMAN	TNR6B_HUMAN	TNRC6B	1.28798	1.13489	0.0724695	-0.176507
sp|O00763|ACACB_HUMAN	ACACB_HUMAN	ACACB	10.1234	3.18173	0.0712382	-0.372797
sp|P17987|TCPA_HUMAN	TCPA_HUMAN	TCP1	3.32169	1.82255	0.0708889	-0.283859
sp|P18206|VINC_HUMAN	VINC_HUMAN	VCL	1.48253	1.21759	0.0701849	0.366201
sp|Q9P2N5|RBM27_HUMAN	RBM27_HUMAN	RBM27	0	0	0.0694532	-0.190576
sp|Q14247|SRC8_HUMAN	SRC8_HUMAN	CTTN	3.86881	1.96693	0.0689168	0.234064
sp|P38432|COIL_HUMAN	COIL_HUMAN	COIL	4.33248	2.08146	0.0689162	0.146054
sp|Q9HB21|PKHA1_HUMAN	PKHA1_HUMAN	PLEKHA1	0	0	0.0685853	-0.119171
sp|Q9HAU0|PKHA5_HUMAN	PKHA5_HUMAN	PLEKHA5	1.74496	1.32097	0.0684975	0.198106
sp|Q9NZC7|WWOX_HUMAN	WWOX_HUMAN	WWOX	2.90268	1.70373	0.0682245	-0.225231
sp|P62917|RL8_HUMAN	RL8_HUMAN	RPL8	1.12937	1.06272	0.0677033	-0.252303
sp|Q16513|PKN2_HUMAN	PKN2_HUMAN	PKN2	1.83625	1.35508	0.0659418	0.244232
sp|Q7Z2W4|ZCCHV_HUMAN	ZCCHV_HUMAN	ZC3HAV1	5.63549	2.37392	0.0640791	-0.217694
sp|O43426|SYNJ1_HUMAN	SYNJ1_HUMAN	SYNJ1	1.29664	1.1387	0.0635319	-0.278716
sp|Q4KWH8|PLCH1_HUMAN	PLCH1_HUMAN	PLCH1	0	0	0.0619458	0.134142
sp|A5YKK6|CNOT1_HUMAN	CNOT1_HUMAN	CNOT1	0	0	0.0619285	0.203056
sp|Q14139|UBE4A_HUMAN	UBE4A_HUMAN	UBE4A	0	0	0.0613135	-0.196629
sp|Q5JTH9|RRP12_HUMAN	RRP12_HUMAN	RRP12	9.52976	3.08703	0.0602645	0.0953063
sp|P63244|RACK1_HUMAN	RACK1_HUMAN	RACK1	2.41084	1.55269	0.0595854	0.236289
sp|Q1ED39|KNOP1_HUMAN	KNOP1_HUMAN	KNOP1	4.47117	2.11451	0.0590709	0.219736
sp|Q15366|PCBP2_HUMAN	PCBP2_HUMAN	PCBP2	2.33659	1.52859	0.0582312	0.139645
sp|Q9Y450|HBS1L_HUMAN	HBS1L_HUMAN	HBS1L	2.5377	1.59302	0.0576675	0.198937
sp|P62854|RS26_HUMAN;sp|Q5JNZ5|RS26L_HUMAN	RS26_HUMAN	RPS26	2.7318	1.65282	0.0573529	0.0859699
sp|Q9UPN3|MACF1_HUMAN	MACF1_HUMAN	MACF1	7.07376	2.65965	0.0554893	-0.286176
sp|P56192|SYMC_HUMAN	SYMC_HUMAN	MARS	0	0	0.0554704	-0.145353
sp|P46778|RL21_HUMAN	RL21_HUMAN	RPL21	1.31899	1.14847	0.0553058	-0.194936
sp|P51149|RAB7A_HUMAN	RAB7A_HUMAN	RAB7A	12.2251	3.49644	0.0546689	0.249069
sp|Q9Y3T9|NOC2L_HUMAN	NOC2L_HUMAN	NOC2L	1.74207	1.31987	0.0540098	0.153277
sp|P18564|ITB6_HUMAN	ITB6_HUMAN	ITGB6	0	0	0.0537938	-0.186445
sp|Q9Y3L5|RAP2C_HUMAN	RAP2C_HUMAN	RAP2C	0	0	0.0534431	0.166404
sp|P42677|RS27_HUMAN	RS27_HUMAN	RPS27	3.22484	1.79578	0.0530275	-0.102719
sp|Q9Y6R0|NUMBL_HUMAN	NUMBL_HUMAN	NUMBL	0	0	0.0529308	0.164346
sp|Q8N5F7|NKAP_HUMAN	NKAP_HUMAN	NKAP	2.76294	1.66221	0.0527053	0.164627
sp|Q92625|ANS1A_HUMAN	ANS1A_HUMAN	ANKS1A	0.927669	0.963156	0.0523866	-0.149098
sp|Q9Y679|AUP1_HUMAN	AUP1_HUMAN	AUP1	1.28454	1.13337	0.0516826	0.167335
sp|Q15365|PCBP1_HUMAN	PCBP1_HUMAN	PCBP1	2.20628	1.48536	0.0512195	0.0991504
sp|Q9UQN3|CHM2B_HUMAN	CHM2B_HUMAN	CHMP2B	0.702109	0.83792	0.0511879	-0.189412
sp|P52701|MSH6_HUMAN	MSH6_HUMAN	MSH6	2.51485	1.58583	0.0509227	0.184842
sp|Q5TC12|ATPF1_HUMAN	ATPF1_HUMAN	ATPAF1	2.13332	1.46059	0.0506778	-0.17257
sp|Q8N0Z3|SPICE_HUMAN	SPICE_HUMAN	SPICE1	3.62917	1.90504	0.0502658	0.210406
sp|Q8N2F6|ARM10_HUMAN	ARM10_HUMAN	ARMC10	1.68223	1.29701	0.0499733	0.172433
sp|O75683|SURF6_HUMAN	SURF6_HUMAN	SURF6	3.39217	1.84179	0.0498807	-0.227496
sp|P63010|AP2B1_HUMAN	AP2B1_HUMAN	AP2B1	1.63082	1.27704	0.0494721	-0.12546
sp|Q9BZF1|OSBL8_HUMAN	OSBL8_HUMAN	OSBPL8	5.044	2.24589	0.0492975	-0.139885
sp|Q07812|BAX_HUMAN	BAX_HUMAN	BAX	2.59827	1.61191	0.0468854	0.19107
sp|Q5JSL3|DOC11_HUMAN	DOC11_HUMAN	DOCK11	0	0	0.0466922	-0.212598
sp|Q92692|NECT2_HUMAN	NECT2_HUMAN	NECTIN2	0	0	0.0466812	0.10436
sp|Q13427|PPIG_HUMAN	PPIG_HUMAN	PPIG	1.28972	1.13566	0.0462234	0.177288
sp|Q9H5V9|CX056_HUMAN	CX056_HUMAN	CXorf56	0.762456	0.873187	0.0444912	-0.173765
sp|Q5VUA4|ZN318_HUMAN	ZN318_HUMAN	ZNF318	0	0	0.0432611	0.104046
sp|P35613|BASI_HUMAN	BASI_HUMAN	BSG	1.12201	1.05925	0.0432311	0.166279
sp|O43933|PEX1_HUMAN	PEX1_HUMAN	PEX1	2.98565	1.7279	0.0428177	-0.182926
sp|Q92841|DDX17_HUMAN	DDX17_HUMAN	DDX17	0	0	0.042656	0.13742
sp|P62241|RS8_HUMAN	RS8_HUMAN	RPS8	3.37572	1.83731	0.0420532	0.0594437
sp|Q14677|EPN4_HUMAN	EPN4_HUMAN	CLINT1	2.90704	1.705	0.0418512	-0.166931
sp|P49454|CENPF_HUMAN	CENPF_HUMAN	CENPF	1.57741	1.25595	0.0413666	0.150991
sp|P46939|UTRO_HUMAN	UTRO_HUMAN	UTRN	6.78675	2.60514	0.041338	0.235322
sp|Q9UH62|ARMX3_HUMAN	ARMX3_HUMAN	ARMCX3	1.92309	1.38676	0.0408663	-0.182969
sp|A1L0T0|ILVBL_HUMAN	ILVBL_HUMAN	ILVBL	91.0474	9.54188	0.0390238	-0.0562686
sp|Q9UPS8|ANR26_HUMAN	ANR26_HUMAN	ANKRD26	5.06958	2.25157	0.0379566	0.150096
sp|Q6WCQ1|MPRIP_HUMAN	MPRIP_HUMAN	MPRIP	2.40738	1.55157	0.0368795	0.0832259
sp|P49069|CAMLG_HUMAN	CAMLG_HUMAN	CAMLG	1.76746	1.32946	0.03536	0.122335
sp|Q9C0D5|TANC1_HUMAN	TANC1_HUMAN	TANC1	3.00072	1.73226	0.035193	-0.124904
sp|Q9Y5T5|UBP16_HUMAN	UBP16_HUMAN	USP16	3.01813	1.73728	0.0347284	0.0919274
sp|Q96AC1|FERM2_HUMAN	FERM2_HUMAN	FERMT2	1.75615	1.3252	0.0343183	-0.102183
sp|P48651|PTSS1_HUMAN	PTSS1_HUMAN	PTDSS1	1.50122	1.22524	0.0338148	-0.106777
sp|Q15388|TOM20_HUMAN	TOM20_HUMAN	TOMM20	1.03644	1.01806	0.033234	0.129552
sp|O14531|DPYL4_HUMAN	DPYL4_HUMAN	DPYSL4	0	0	0.0332249	-0.086163
sp|Q08379|GOGA2_HUMAN	GOGA2_HUMAN	GOLGA2	3.10101	1.76097	0.0329744	0.114735
sp|Q13325|IFIT5_HUMAN	IFIT5_HUMAN	IFIT5	0.789528	0.888554	0.0329199	-0.0942828
sp|Q14674|ESPL1_HUMAN	ESPL1_HUMAN	ESPL1	0	0	0.0319132	-0.0964517
sp|Q07065|CKAP4_HUMAN	CKAP4_HUMAN	CKAP4	5.65526	2.37808	0.0310881	0.0866827
sp|Q5UIP0|RIF1_HUMAN	RIF1_HUMAN	RIF1	1.53503	1.23896	0.030149	-0.0734929
sp|Q9H6Z4|RANB3_HUMAN	RANB3_HUMAN	RANBP3	0.920123	0.959231	0.0301031	-0.102135
sp|P34932|HSP74_HUMAN	HSP74_HUMAN	HSPA4	1.07449	1.03657	0.0300113	0.10027
sp|Q12983|BNIP3_HUMAN	BNIP3_HUMAN	BNIP3	0	0	0.0285227	-0.0828248
sp|P61619|S61A1_HUMAN	S61A1_HUMAN	SEC61A1	1.88009	1.37117	0.0284652	0.10474
sp|E9PRG8|CK098_HUMAN	CK098_HUMAN	C11orf98	0	0	0.0282024	-0.0895537
sp|O95372|LYPA2_HUMAN	LYPA2_HUMAN	LYPLA2	1.48558	1.21884	0.0279355	-0.110287
sp|P43121|MUC18_HUMAN	MUC18_HUMAN	MCAM	0	0	0.0272927	0.0752347
sp|Q15390|MTFR1_HUMAN	MTFR1_HUMAN	MTFR1	0.911887	0.954928	0.0257247	-0.0955322
sp|Q9UPW5|CBPC1_HUMAN	CBPC1_HUMAN	AGTPBP1	4.20032	2.04947	0.0253531	-0.0814882
sp|Q15738|NSDHL_HUMAN	NSDHL_HUMAN	NSDHL	0	0	0.0253115	0.096083
sp|Q9Y277|VDAC3_HUMAN	VDAC3_HUMAN	VDAC3	0	0	0.0247169	0.069997
sp|O94806|KPCD3_HUMAN	KPCD3_HUMAN	PRKD3	0	0	0.0242582	-0.047318
sp|P18031|PTN1_HUMAN	PTN1_HUMAN	PTPN1	3.33461	1.82609	0.0233433	-0.0388305
sp|Q14137|BOP1_HUMAN	BOP1_HUMAN	BOP1	2.98646	1.72814	0.0219454	0.0786314
sp|P11387|TOP1_HUMAN	TOP1_HUMAN	TOP1	2.56632	1.60198	0.0207971	-0.0792068
sp|P49327|FAS_HUMAN	FAS_HUMAN	FASN	13.2205	3.636	0.0200936	-0.0418011
sp|Q16543|CDC37_HUMAN	CDC37_HUMAN	CDC37	2.01499	1.4195	0.020065	-0.0566746
sp|Q7Z2K8|GRIN1_HUMAN	GRIN1_HUMAN	GPRIN1	0	0	0.0174707	0.05149
sp|Q96N67|DOCK7_HUMAN	DOCK7_HUMAN	DOCK7	2.57608	1.60502	0.0174579	0.11787
sp|Q5SQN1|SNP47_HUMAN	SNP47_HUMAN	SNAP47	7.61367	2.75929	0.0165973	0.0565491
sp|P78318|IGBP1_HUMAN	IGBP1_HUMAN	IGBP1	0	0	0.0164808	0.033518
sp|Q96RT1|ERBIN_HUMAN	ERBIN_HUMAN	ERBIN	0	0	0.0159215	0.0330882
sp|Q8N6T3|ARFG1_HUMAN	ARFG1_HUMAN	ARFGAP1	1.72181	1.31218	0.0148704	0.0579727
sp|O75592|MYCB2_HUMAN	MYCB2_HUMAN	MYCBP2	4.85867	2.20424	0.0138787	-0.0653307
sp|P63261|ACTG_HUMAN;sp|P60709|ACTB_HUMAN	ACTG_HUMAN	ACTG1	0	0	0.0129277	0.0352205
sp|P10809|CH60_HUMAN	CH60_HUMAN	HSPD1	3.27231	1.80895	0.0120865	0.0450444
sp|Q9BSJ8|ESYT1_HUMAN	ESYT1_HUMAN	ESYT1	4.2782	2.06838	0.0114365	-0.0516696
sp|Q96JB5|CK5P3_HUMAN	CK5P3_HUMAN	CDK5RAP3	1.72799	1.31453	0.0107351	-0.0235751
sp|Q9P2D1|CHD7_HUMAN	CHD7_HUMAN	CHD7	4.11143	2.02766	0.00971682	0.0179213
sp|Q9H1K0|RBNS5_HUMAN	RBNS5_HUMAN	RBSN	2.49463	1.57944	0.00923993	0.0197556
sp|Q13136|LIPA1_HUMAN	LIPA1_HUMAN	PPFIA1	1.33671	1.15616	0.0089856	0.0285083
sp|Q15637|SF01_HUMAN	SF01_HUMAN	SF1	0	0	0.00890641	-0.0200473
sp|Q8WVX9|FACR1_HUMAN	FACR1_HUMAN	FAR1	9.172	3.02853	0.00829303	-0.0168039
sp|Q8IYU8|MICU2_HUMAN	MICU2_HUMAN	MICU2	0	0	0.00669592	-0.0199422
sp|Q15758|AAAT_HUMAN	AAAT_HUMAN	SLC1A5	3.80781	1.95136	0.00547782	0.0153187
sp|Q05655|KPCD_HUMAN	KPCD_HUMAN	PRKCD	1.52624	1.23541	0.00423201	0.0119332
sp|Q8N6R0|MET13_HUMAN	MET13_HUMAN	METTL13	0	0	0.00242091	0.00711975
sp|Q12802|AKP13_HUMAN	AKP13_HUMAN	AKAP13	2.32931	1.52621	0.00199478	0.00894987
sp|Q5JSH3|WDR44_HUMAN	WDR44_HUMAN	WDR44	1.9807	1.40737	0.0016661	-0.0072684

## Sheet: Rab6 TN
Majority protein IDs	Uniprot	Gene NAME	WD score	Root WD score	Log Student's T-test p-value Rab6 TN	Student's T-test Difference Rab6 TN
sp|P20340|RAB6A_HUMAN	RAB6A_HUMAN	RAB6A	159.02	12.6103	6.56719	8.18324
sp|Q9P246|STIM2_HUMAN	STIM2_HUMAN	STIM2	406.368	20.1586	4.29242	2.89861
sp|Q7Z7L1|SLN11_HUMAN	SLN11_HUMAN	SLFN11	77.5775	8.80781	3.94042	3.23452
sp|Q9Y426|C2CD2_HUMAN	C2CD2_HUMAN	C2CD2	77.9504	8.82895	3.46337	2.35614
sp|O94822|LTN1_HUMAN	LTN1_HUMAN	LTN1	21.9261	4.68253	2.86928	3.81757
sp|Q9Y4H2|IRS2_HUMAN	IRS2_HUMAN	IRS2	80.0973	8.94971	2.85399	4.94273
sp|P32780|TF2H1_HUMAN	TF2H1_HUMAN	GTF2H1	8.32074	2.88457	2.6702	2.55678
sp|O94813|SLIT2_HUMAN	SLIT2_HUMAN	SLIT2	17.944	4.23604	2.33576	4.16958
sp|O14654|IRS4_HUMAN	IRS4_HUMAN	IRS4	4.22062	2.05441	2.2031	-5.36736
sp|Q5T749|KPRP_HUMAN	KPRP_HUMAN	KPRP	0	0	2.1932	2.24397
sp|Q96GA3|LTV1_HUMAN	LTV1_HUMAN	LTV1	43.1856	6.57157	2.09194	3.83643
sp|Q9UH62|ARMX3_HUMAN	ARMX3_HUMAN	ARMCX3	0	0	2.08111	-4.33409
sp|Q5DJT8|CT452_HUMAN;sp|P0DMV2|CT459_HUMAN;sp|P0DMV1|CT458_HUMAN;sp|P0DMU9|CT45A_HUMAN;sp|Q8NHU0|CT453_HUMAN;sp|Q5HYN5|CT451_HUMAN;sp|P0DMV0|CT457_HUMAN;sp|P0DMU8|CT455_HUMAN;sp|P0DMU7|CT456_HUMAN	CT452_HUMAN	CT45A2	36.0875	6.00729	2.03077	2.92601
sp|P68363|TBA1B_HUMAN	TBA1B_HUMAN	TUBA1B	6.86518	2.62015	2.01978	1.01347
sp|P51571|SSRD_HUMAN	SSRD_HUMAN	SSR4	0	0	1.96106	1.48943
sp|Q9Y266|NUDC_HUMAN	NUDC_HUMAN	NUDC	2.82314	1.68022	1.93422	-2.12083
sp|Q9UHI8|ATS1_HUMAN	ATS1_HUMAN	ADAMTS1	14.2878	3.77992	1.76907	1.7523
sp|P35579|MYH9_HUMAN	MYH9_HUMAN	MYH9	3.27219	1.80892	1.76616	-3.64198
sp|Q9UJV9|DDX41_HUMAN	DDX41_HUMAN	DDX41	13.3912	3.6594	1.76224	2.5252
sp|O75643|U520_HUMAN	U520_HUMAN	SNRNP200	17.5914	4.19421	1.73189	2.86372
sp|Q8N0V3|RBFA_HUMAN	RBFA_HUMAN	RBFA	2.15307	1.46734	1.711	2.36433
sp|P12273|PIP_HUMAN	PIP_HUMAN	PIP	10.8269	3.29042	1.69479	2.80038
sp|P52306|GDS1_HUMAN	GDS1_HUMAN	RAP1GDS1	48.3287	6.95189	1.68474	5.35659
sp|O43143|DHX15_HUMAN	DHX15_HUMAN	DHX15	10.8018	3.28661	1.68414	3.04694
sp|Q9HCM4|E41L5_HUMAN	E41L5_HUMAN	EPB41L5	6.27847	2.50569	1.6838	2.97207
sp|O94906|PRP6_HUMAN	PRP6_HUMAN	PRPF6	15.4087	3.92539	1.67884	3.77058
sp|P46777|RL5_HUMAN	RL5_HUMAN	RPL5	3.55893	1.88651	1.62898	1.82882
sp|P21127|CD11B_HUMAN;sp|Q9UQ88|CD11A_HUMAN	CD11B_HUMAN	CDK11B	4.82446	2.19646	1.61969	2.37362
sp|Q9Y6K0|CEPT1_HUMAN	CEPT1_HUMAN	CEPT1	0	0	1.60551	2.05923
sp|Q96KP1|EXOC2_HUMAN	EXOC2_HUMAN	EXOC2	29.8446	5.46302	1.60131	2.48231
sp|Q5VWQ8|DAB2P_HUMAN	DAB2P_HUMAN	DAB2IP	0	0	1.57626	1.14061
sp|Q9NPI1|BRD7_HUMAN	BRD7_HUMAN	BRD7	3.57653	1.89117	1.54536	1.3811
sp|Q5T9A4|ATD3B_HUMAN	ATD3B_HUMAN	#N/A	#N/A	#N/A	1.53918	1.7374
sp|O15357|SHIP2_HUMAN	SHIP2_HUMAN	INPPL1	0	0	1.53811	1.36376
sp|P50402|EMD_HUMAN	EMD_HUMAN	EMD	0	0	1.52066	-2.39962
sp|Q15311|RBP1_HUMAN	RBP1_HUMAN	RALBP1	17.5149	4.18509	1.48165	2.96625
sp|O43592|XPOT_HUMAN	XPOT_HUMAN	XPOT	8.88798	2.98127	1.46031	2.09742
sp|Q9H4L5|OSBL3_HUMAN	OSBL3_HUMAN	OSBPL3	9.9113	3.14822	1.43541	2.95302
sp|Q96G28|CFA36_HUMAN	CFA36_HUMAN	CFAP36	0	0	1.42637	1.05639
sp|A1L0T0|ILVBL_HUMAN	ILVBL_HUMAN	ILVBL	5.70334	2.38817	1.40894	0.801283
sp|Q9H7Z3|NRDE2_HUMAN	NRDE2_HUMAN	NRDE2	14.2547	3.77554	1.36262	2.81942
sp|Q9Y6M5|ZNT1_HUMAN	ZNT1_HUMAN	SLC30A1	2.82972	1.68218	1.34512	1.78059
sp|Q9UJS0|CMC2_HUMAN	CMC2_HUMAN	SLC25A13	3.29052	1.81398	1.33012	2.16635
sp|Q2TBE0|C19L2_HUMAN	C19L2_HUMAN	CWF19L2	2.33218	1.52715	1.31755	1.2811
sp|Q15648|MED1_HUMAN	MED1_HUMAN	MED1	0	0	1.30591	1.33399
sp|Q6P2H3|CEP85_HUMAN	CEP85_HUMAN	CEP85	0	0	1.30555	1.40436
sp|Q07812|BAX_HUMAN	BAX_HUMAN	BAX	1.15915	1.07664	1.3024	-2.93343
sp|Q6WCQ1|MPRIP_HUMAN	MPRIP_HUMAN	MPRIP	31.7326	5.63317	1.28346	1.57881
sp|Q14008|CKAP5_HUMAN	CKAP5_HUMAN	CKAP5	3.24389	1.80108	1.27896	-3.81915
sp|O94876|TMCC1_HUMAN	TMCC1_HUMAN	TMCC1	77.1853	8.78552	1.27862	1.42796
sp|P31943|HNRH1_HUMAN	HNRH1_HUMAN	HNRNPH1	0	0	1.26692	1.03328
sp|P12270|TPR_HUMAN	TPR_HUMAN	TPR	7.0567	2.65645	1.26377	-2.44524
sp|P08238|HS90B_HUMAN	HS90B_HUMAN	HSP90AB1	4.98493	2.2327	1.26373	-1.42703
sp|Q86Y07|VRK2_HUMAN	VRK2_HUMAN	VRK2	0	0	1.25201	1.25511
sp|Q9H792|PEAK1_HUMAN	PEAK1_HUMAN	PEAK1	0	0	1.24146	1.26232
sp|Q15431|SYCP1_HUMAN	SYCP1_HUMAN	SYCP1	0	0	1.21461	1.95153
sp|Q96JH7|VCIP1_HUMAN	VCIP1_HUMAN	VCPIP1	2.87997	1.69705	1.21003	-3.56486
sp|Q96HE9|PRR11_HUMAN	PRR11_HUMAN	PRR11	2.5833	1.60726	1.20651	1.7281
sp|Q3YEC7|RABL6_HUMAN	RABL6_HUMAN	RABL6	5.47082	2.33898	1.20288	2.75734
sp|Q86YS7|C2CD5_HUMAN	C2CD5_HUMAN	C2CD5	6.51596	2.55264	1.1979	2.48011
sp|Q3ZCM7|TBB8_HUMAN	TBB8_HUMAN	#N/A	#N/A	#N/A	1.19565	2.25487
sp|Q9Y4W2|LAS1L_HUMAN	LAS1L_HUMAN	LAS1L	8.09414	2.84502	1.18755	1.6659
sp|Q9Y5X1|SNX9_HUMAN	SNX9_HUMAN	SNX9	9.9553	3.1552	1.16627	2.51499
sp|Q9ULS5|TMCC3_HUMAN	TMCC3_HUMAN	TMCC3	5.74181	2.39621	1.15762	1.12722
sp|Q8N0Z3|SPICE_HUMAN	SPICE_HUMAN	SPICE1	8.04258	2.83594	1.15551	2.57856
sp|Q9HD67|MYO10_HUMAN	MYO10_HUMAN	MYO10	27.5642	5.25016	1.15487	2.43733
sp|O75153|CLU_HUMAN	CLU_HUMAN	CLUH	0	0	1.15362	1.69071
sp|Q5HYI7|MTX3_HUMAN	MTX3_HUMAN	MTX3	0.68313	0.826517	1.15291	-2.27867
sp|Q9UNX4|WDR3_HUMAN	WDR3_HUMAN	WDR3	8.36815	2.89277	1.1524	1.82242
sp|Q9NU22|MDN1_HUMAN	MDN1_HUMAN	MDN1	16.6083	4.07533	1.13987	3.16259
sp|Q9UHQ9|NB5R1_HUMAN	NB5R1_HUMAN	CYB5R1	0.669864	0.818452	1.13818	-2.43627
sp|Q8NC51|PAIRB_HUMAN	PAIRB_HUMAN	SERBP1	0	0	1.13784	-2.64097
sp|Q8IVF7|FMNL3_HUMAN	FMNL3_HUMAN	FMNL3	6.7058	2.58956	1.13156	2.87236
sp|P21359|NF1_HUMAN	NF1_HUMAN	NF1	3.77595	1.94318	1.12716	1.35151
sp|Q9Y5V3|MAGD1_HUMAN	MAGD1_HUMAN	MAGED1	6.66076	2.58084	1.12654	1.34235
sp|Q3ZCQ8|TIM50_HUMAN	TIM50_HUMAN	TIMM50	7.4762	2.73426	1.12549	2.11916
sp|Q9NV70|EXOC1_HUMAN	EXOC1_HUMAN	EXOC1	12.2512	3.50017	1.12233	1.8314
sp|Q16650|TBR1_HUMAN	TBR1_HUMAN	TBR1	0	0	1.11282	1.40278
sp|Q7Z401|MYCPP_HUMAN	MYCPP_HUMAN	DENND4A	4.69144	2.16597	1.10306	-1.32463
sp|Q12789|TF3C1_HUMAN	TF3C1_HUMAN	GTF3C1	0	0	1.09487	-1.52873
sp|Q9UQ35|SRRM2_HUMAN	SRRM2_HUMAN	SRRM2	7.41672	2.72337	1.08265	3.40178
sp|Q9H6Z4|RANB3_HUMAN	RANB3_HUMAN	RANBP3	0	0	1.06714	-1.98227
sp|O00541|PESC_HUMAN	PESC_HUMAN	PES1	7.95442	2.82036	1.05429	2.18125
sp|Q15393|SF3B3_HUMAN	SF3B3_HUMAN	SF3B3	3.32465	1.82336	1.04893	1.39803
sp|Q8IY81|SPB1_HUMAN	SPB1_HUMAN	FTSJ3	6.54574	2.55847	1.04874	1.69735
sp|P62979|RS27A_HUMAN;sp|P0CG47|UBB_HUMAN;sp|P0CG48|UBC_HUMAN	RS27A_HUMAN	RPS27A	5.15556	2.27059	1.04867	0.662359
sp|Q9NZ01|TECR_HUMAN	TECR_HUMAN	TECR	6.61655	2.57226	1.03951	2.68829
sp|O75962|TRIO_HUMAN	TRIO_HUMAN	TRIO	3.1511	1.77513	1.03659	1.28055
sp|O14980|XPO1_HUMAN	XPO1_HUMAN	XPO1	14.0354	3.74639	1.02536	1.75683
sp|Q96EA4|SPDLY_HUMAN	SPDLY_HUMAN	SPDL1	2.68761	1.63939	1.02178	1.55733
sp|Q9Y2K1|ZBTB1_HUMAN	ZBTB1_HUMAN	ZBTB1	0	0	1.02067	-1.00933
sp|Q96JQ2|CLMN_HUMAN	CLMN_HUMAN	CLMN	2.89482	1.70142	1.01138	1.46098
sp|Q13823|NOG2_HUMAN	NOG2_HUMAN	GNL2	9.82861	3.13506	1.00845	2.45191
sp|O43663|PRC1_HUMAN	PRC1_HUMAN	PRC1	2.43441	1.56026	1.002	1.5448
sp|Q14137|BOP1_HUMAN	BOP1_HUMAN	BOP1	5.03484	2.24385	1.00164	2.20669
sp|P35611|ADDA_HUMAN	ADDA_HUMAN	ADD1	4.80991	2.19315	0.998797	2.32245
[truncated: 926 more rows]

## Sheet: Rab7 QL
Majority protein IDs	Uniprot	Gene NAME	WD score	Root WD score	Log Student's T-test p-value Rab7 QL	Student's T-test Difference Rab7 QL
[truncated: 880 more rows]

[truncated: 8 more sheets: Rab8 QL, Rab9 QL, Rab10 QL, Rab11 QL, Rab11 SN, Rab18 QL, Rab30 QL, Rab33 QL]
