# Supplementary material for: In vivo identification of GTPase interactors by mitochondrial relocalization and proximity biotinylation
Source: eLife. 2019 Jul 11;8:e45916. doi: 10.7554/eLife.45916 (PMC6639074; doi:10.7554/eLife.45916)
Supplement: Supplementary file 4. — For each GTPase form indicated in the tabs, the LFQ intensities of every protein found in at least two of the triplicates was compared to the values obtained with the GDP forms of all GTPases by using the Perseus platform. The difference, expressed as log2 of the ratio, and the P-value for the significance of the difference are shown, with these being used to generate the volcano plots shown in the figures. Also shown are the WD score for each interaction as obtained from analysis of spectral counts. Excel (.xlsx) file. [file elife-45916-supp4.xlsx]

## Sheet: Cdc42 QL
Majority protein IDs	Uniprot	Gene NAME	WD score	Root WD score	Log Student's T-test p-value Cdc42 QL	Student's T-test Difference Cdc42 QL
sp|Q13576|IQGA2_HUMAN	IQGA2_HUMAN	IQGAP2	2556.22	50.5591	30.2912	10.0113
sp|P46940|IQGA1_HUMAN	IQGA1_HUMAN	IQGAP1	1858.1	43.1057	21.7808	10.3644
sp|Q9Y5S2|MRCKB_HUMAN	MRCKB_HUMAN	CDC42BPB	3923.81	62.6403	19.263	9.60376
sp|Q6XZF7|DNMBP_HUMAN	DNMBP_HUMAN	DNMBP	384.335	19.6045	18.4838	8.49041
sp|Q00587|BORG5_HUMAN	BORG5_HUMAN	CDC42EP1	5094.02	71.3724	18.0983	7.85778
sp|Q13177|PAK2_HUMAN	PAK2_HUMAN	PAK2	2588.1	50.8733	18.0485	8.58998
sp|Q9H3Q1|BORG4_HUMAN	BORG4_HUMAN	CDC42EP4	9601.51	97.9873	17.7683	6.92684
sp|Q92614|MY18A_HUMAN	MY18A_HUMAN	MYO18A	1772.28	42.0985	17.3941	7.12665
sp|Q9Y597|KCTD3_HUMAN	KCTD3_HUMAN	KCTD3	10806.8	103.956	17.1117	6.24882
sp|O96013|PAK4_HUMAN	PAK4_HUMAN	PAK4	4826.71	69.4745	15.5963	7.68877
sp|O14613|BORG1_HUMAN	BORG1_HUMAN	CDC42EP2	6293.46	79.3313	13.1099	5.38881
sp|O00401|WASL_HUMAN	WASL_HUMAN	WASL	9132.96	95.5665	12.4773	5.80863
sp|Q07912|ACK1_HUMAN	ACK1_HUMAN	TNK2	8886.71	94.2693	11.918	5.12538
sp|Q9NZN5|ARHGC_HUMAN	ARHGC_HUMAN	ARHGEF12	872.225	29.5335	11.0107	9.87759
sp|Q9UQB8|BAIP2_HUMAN	BAIP2_HUMAN	BAIAP2	5961.42	77.2102	10.435	5.84051
sp|Q8TER5|ARH40_HUMAN	ARH40_HUMAN	ARHGEF40	129.143	11.3641	10.1646	6.57966
sp|Q5VT25|MRCKA_HUMAN	MRCKA_HUMAN	CDC42BPA	648.445	25.4646	9.04529	11.0604
sp|Q16181|SEPT7_HUMAN	SEPT7_HUMAN	SEPTIN7	772.835	27.7999	7.79054	3.87325
sp|Q2M1Z3|RHG31_HUMAN	RHG31_HUMAN	ARHGAP31	1562.54	39.5289	7.34271	3.41053
sp|A7KAX9|RHG32_HUMAN	RHG32_HUMAN	ARHGAP32	658.846	25.668	7.2547	7.6782
sp|Q9BYG4|PAR6G_HUMAN	PAR6G_HUMAN	PARD6G	197.354	14.0483	6.79047	2.97924
sp|P60953|CDC42_HUMAN	CDC42_HUMAN	CDC42	5966.01	77.24	6.77492	11.3297
sp|O15085|ARHGB_HUMAN	ARHGB_HUMAN	ARHGEF11	433.061	20.8101	6.0573	6.12097
sp|Q8TBC3|SHKB1_HUMAN	SHKB1_HUMAN	SHKBP1	656.199	25.6164	5.16275	2.89249
sp|Q9NSV4|DIAP3_HUMAN	DIAP3_HUMAN	DIAPH3	52.4283	7.24074	5.10531	6.30116
sp|Q58EX7|PKHG4_HUMAN	PKHG4_HUMAN	PLEKHG4	340.937	18.4645	4.92946	3.75018
sp|Q8TEW0|PARD3_HUMAN	PARD3_HUMAN	PARD3	122.5	11.068	4.77031	3.15376
sp|Q86VI3|IQGA3_HUMAN	IQGA3_HUMAN	IQGAP3	9.67829	3.11099	4.2552	2.46449
sp|Q15052|ARHG6_HUMAN	ARHG6_HUMAN	ARHGEF6	7.36684	2.71419	4.07194	2.38758
sp|Q8IXI2|MIRO1_HUMAN	MIRO1_HUMAN	RHOT1	85.6295	9.25362	3.19376	3.39979
sp|Q7Z6J0|SH3R1_HUMAN	SH3R1_HUMAN	SH3RF1	280.584	16.7506	3.14286	2.75455
sp|Q92974|ARHG2_HUMAN	ARHG2_HUMAN	ARHGEF2	329.22	18.1444	3.07197	5.52198
sp|Q8TDN4|CABL1_HUMAN	CABL1_HUMAN	CABLES1	4.36631	2.08957	2.87302	2.3135
sp|Q12983|BNIP3_HUMAN	BNIP3_HUMAN	BNIP3	24.3594	4.93552	2.86294	3.57388
sp|O60879|DIAP2_HUMAN	DIAP2_HUMAN	DIAPH2	138.585	11.7722	2.83115	2.90243
sp|P51153|RAB13_HUMAN	RAB13_HUMAN	RAB13	114.204	10.6866	2.68406	3.15525
sp|Q9UHD8|SEPT9_HUMAN	SEPT9_HUMAN	SEPTIN9	115.787	10.7604	2.67541	3.02653
sp|P17066|HSP76_HUMAN	HSP76_HUMAN	HSPA6	0	0	2.42893	-3.02808
sp|Q9NYJ8|TAB2_HUMAN	TAB2_HUMAN	TAB2	56.7387	7.53251	2.36316	2.75754
sp|B2RTY4|MYO9A_HUMAN	MYO9A_HUMAN	MYO9A	46.0558	6.78644	2.34309	3.84464
sp|Q9BZ29|DOCK9_HUMAN	DOCK9_HUMAN	DOCK9	983.21	31.3562	2.18672	4.20021
sp|P22626|ROA2_HUMAN	ROA2_HUMAN	HNRNPA2B1	4.15267	2.03781	2.05196	1.96282
sp|Q9Y2G8|DJC16_HUMAN	DJC16_HUMAN	DNAJC16	3.12738	1.76844	1.81842	1.52025
sp|P83881|RL36A_HUMAN	RL36A_HUMAN	RPL36A	8.45222	2.90727	1.78808	1.33313
sp|O15357|SHIP2_HUMAN	SHIP2_HUMAN	INPPL1	314.08	17.7223	1.7351	1.3412
sp|Q12872|SFSWA_HUMAN	SFSWA_HUMAN	SFSWAP	4.02662	2.00664	1.7011	2.29323
sp|Q9UM54|MYO6_HUMAN	MYO6_HUMAN	MYO6	17.7662	4.215	1.62024	2.83545
sp|P62861|RS30_HUMAN	RS30_HUMAN	FAU	4.77984	2.18629	1.56394	1.52867
sp|O43399|TPD54_HUMAN	TPD54_HUMAN	TPD52L2	0	0	1.53272	1.78124
sp|Q5JSL3|DOC11_HUMAN	DOC11_HUMAN	DOCK11	1949.6	44.1543	1.45402	3.55094
sp|Q13442|HAP28_HUMAN	HAP28_HUMAN	PDAP1	0	0	1.41037	1.61154
sp|Q9UHI8|ATS1_HUMAN	ATS1_HUMAN	ADAMTS1	1.88996	1.37476	1.39011	1.54119
sp|Q9P035|HACD3_HUMAN	HACD3_HUMAN	HACD3	3.19537	1.78756	1.3699	-1.19798
sp|Q9H7C9|AAMDC_HUMAN	AAMDC_HUMAN	AAMDC	2.27197	1.5073	1.34359	2.24283
sp|Q5SY16|NOL9_HUMAN	NOL9_HUMAN	NOL9	4.01492	2.00373	1.33135	1.59671
sp|Q6ZSR9|YJ005_HUMAN	YJ005_HUMAN	FLJ45252	7.76875	2.78725	1.30926	1.77016
sp|Q8N8S7|ENAH_HUMAN	ENAH_HUMAN	#N/A	#N/A	#N/A	1.29987	1.11234
sp|Q15334|L2GL1_HUMAN	L2GL1_HUMAN	LLGL1	112.606	10.6116	1.27665	1.57908
sp|O60231|DHX16_HUMAN	DHX16_HUMAN	DHX16	3.7277	1.93073	1.22755	1.59846
sp|Q9BRX8|F213A_HUMAN	F213A_HUMAN	FAM213A	0	0	1.22528	-1.15438
sp|P11021|GRP78_HUMAN	GRP78_HUMAN	HSPA5	12.1058	3.47933	1.209	2.73376
sp|Q7Z401|MYCPP_HUMAN	MYCPP_HUMAN	DENND4A	0	0	1.19363	1.39125
sp|O43143|DHX15_HUMAN	DHX15_HUMAN	DHX15	8.74443	2.9571	1.184	2.41681
sp|Q71RC2|LARP4_HUMAN	LARP4_HUMAN	LARP4	9.74963	3.12244	1.1637	2.37646
sp|Q99996|AKAP9_HUMAN	AKAP9_HUMAN	AKAP9	0.787336	0.88732	1.14888	-3.50434
sp|Q9Y2U8|MAN1_HUMAN	MAN1_HUMAN	LEMD3	6.55444	2.56016	1.14538	2.57964
sp|Q8NAN2|MIGA1_HUMAN	MIGA1_HUMAN	MIGA1	3.79962	1.94926	1.12678	3.44287
sp|P31948|STIP1_HUMAN	STIP1_HUMAN	STIP1	1.79555	1.33998	1.09572	-2.96889
sp|P02786|TFR1_HUMAN	TFR1_HUMAN	TFRC	10.0033	3.1628	1.09391	2.20889
sp|Q08945|SSRP1_HUMAN	SSRP1_HUMAN	SSRP1	10.5751	3.25194	1.07883	1.51329
sp|Q5T6F2|UBAP2_HUMAN	UBAP2_HUMAN	UBAP2	4.55941	2.13528	1.07751	2.46816
sp|Q92667|AKAP1_HUMAN	AKAP1_HUMAN	AKAP1	12.2505	3.50007	1.06783	1.1866
sp|P62979|RS27A_HUMAN;sp|P0CG47|UBB_HUMAN;sp|P0CG48|UBC_HUMAN	RS27A_HUMAN	RPS27A	4.76565	2.18304	1.05682	-0.681862
sp|Q07065|CKAP4_HUMAN	CKAP4_HUMAN	CKAP4	3.4078	1.84602	1.04892	-1.76524
sp|P33981|TTK_HUMAN	TTK_HUMAN	TTK	4.6328	2.15239	1.04692	2.46347
sp|Q9C026|TRIM9_HUMAN	TRIM9_HUMAN	TRIM9	0	0	1.01758	0.962507
sp|Q9ULL1|PKHG1_HUMAN	PKHG1_HUMAN	PLEKHG1	14.5022	3.80818	1.01647	1.01967
sp|P17987|TCPA_HUMAN	TCPA_HUMAN	TCP1	1.45182	1.20491	1.00175	-2.59678
sp|Q9BSD7|NTPCR_HUMAN	NTPCR_HUMAN	NTPCR	1.70071	1.30411	1.00114	-1.46459
sp|Q9Y4G8|RPGF2_HUMAN	RPGF2_HUMAN	RAPGEF2	0	0	0.998702	1.48041
sp|Q5HYK7|SH319_HUMAN	SH319_HUMAN	SH3D19	2.25308	1.50103	0.998163	1.79222
sp|Q6P2H3|CEP85_HUMAN	CEP85_HUMAN	CEP85	90.4994	9.51311	0.994955	1.1229
sp|P62937|PPIA_HUMAN	PPIA_HUMAN	PPIA	4.76424	2.18271	0.994303	1.667
sp|Q5TCX8|M3KL4_HUMAN	M3KL4_HUMAN	MAP3K21	4.47338	2.11504	0.990205	0.838099
sp|P78344|IF4G2_HUMAN	IF4G2_HUMAN	EIF4G2	5.72352	2.39239	0.987691	2.83692
sp|P28288|ABCD3_HUMAN	ABCD3_HUMAN	ABCD3	6.86674	2.62045	0.979333	-0.940529
sp|O00429|DNM1L_HUMAN	DNM1L_HUMAN	DNM1L	7.74553	2.78308	0.961591	1.39667
sp|Q16643|DREB_HUMAN	DREB_HUMAN	DBN1	6.82033	2.61158	0.953149	1.06677
sp|O75179|ANR17_HUMAN	ANR17_HUMAN	ANKRD17	10.9568	3.31011	0.951219	2.75357
sp|Q9H3N1|TMX1_HUMAN	TMX1_HUMAN	TMX1	0	0	0.947775	-2.5418
sp|Q9NSE4|SYIM_HUMAN	SYIM_HUMAN	IARS2	2.04404	1.4297	0.926698	-2.69969
sp|Q8N350|CBARP_HUMAN	CBARP_HUMAN	CBARP	0	0	0.902427	2.02503
sp|Q9H7N4|SFR19_HUMAN	SFR19_HUMAN	SCAF1	8.62089	2.93613	0.90173	1.95452
sp|Q9Y5Z9|UBIA1_HUMAN	UBIA1_HUMAN	UBIAD1	0	0	0.900517	1.67316
sp|Q9HAD4|WDR41_HUMAN	WDR41_HUMAN	WDR41	0.768812	0.876819	0.887297	-2.18773
sp|P62266|RS23_HUMAN	RS23_HUMAN	RPS23	5.1341	2.26586	0.885189	0.953559
sp|Q99439|CNN2_HUMAN	CNN2_HUMAN	CNN2	0	0	0.881071	1.73369
sp|P24752|THIL_HUMAN	THIL_HUMAN	ACAT1	1.32368	1.15051	0.874915	-1.92726
sp|P11274|BCR_HUMAN	BCR_HUMAN	BCR	16.0424	4.0053	0.872849	2.47843
sp|Q8IXI1|MIRO2_HUMAN	MIRO2_HUMAN	RHOT2	4.33332	2.08166	0.870856	2.21961
sp|Q2NL82|TSR1_HUMAN	TSR1_HUMAN	TSR1	2.61087	1.61582	0.869103	1.0272
sp|Q9H792|PEAK1_HUMAN	PEAK1_HUMAN	PEAK1	3.22983	1.79717	0.863508	1.03938
sp|Q15678|PTN14_HUMAN	PTN14_HUMAN	PTPN14	5.47854	2.34063	0.854124	0.860076
sp|Q92574|TSC1_HUMAN	TSC1_HUMAN	TSC1	39.2873	6.26796	0.853363	1.60346
sp|Q9UPP1|PHF8_HUMAN	PHF8_HUMAN	PHF8	15.6329	3.95385	0.844048	1.52831
sp|Q9P0K7|RAI14_HUMAN	RAI14_HUMAN	RAI14	1.71134	1.30818	0.827061	-2.29366
sp|Q96GQ7|DDX27_HUMAN	DDX27_HUMAN	DDX27	6.5474	2.55879	0.822234	2.18182
sp|P16401|H15_HUMAN	H15_HUMAN	HIST1H1B	23.311	4.82815	0.81876	1.77909
sp|Q7L804|RFIP2_HUMAN	RFIP2_HUMAN	RAB11FIP2	1.02962	1.0147	0.811556	-1.71604
sp|Q7Z434|MAVS_HUMAN	MAVS_HUMAN	MAVS	6.27011	2.50402	0.809946	0.947228
sp|Q99442|SEC62_HUMAN	SEC62_HUMAN	SEC62	0	0	0.802362	-2.60941
sp|O75976|CBPD_HUMAN	CBPD_HUMAN	CPD	1.03705	1.01835	0.80093	-2.06543
sp|Q969Q0|RL36L_HUMAN	RL36L_HUMAN	RPL36AL	6.43858	2.53743	0.78593	2.23963
sp|Q4VCS5|AMOT_HUMAN	AMOT_HUMAN	AMOT	9.95914	3.15581	0.784142	3.01609
sp|Q5JTH9|RRP12_HUMAN	RRP12_HUMAN	RRP12	9.67399	3.1103	0.782641	0.824566
sp|Q9UQL6|HDAC5_HUMAN	HDAC5_HUMAN	HDAC5	1.51651	1.23147	0.780459	1.26655
sp|Q9HCM4|E41L5_HUMAN	E41L5_HUMAN	EPB41L5	4.90492	2.21471	0.779795	1.83602
sp|P62899|RL31_HUMAN	RL31_HUMAN	RPL31	3.1945	1.78732	0.773465	1.1903
sp|Q4KMP7|TB10B_HUMAN	TB10B_HUMAN	TBC1D10B	0	0	0.772952	-1.74479
sp|Q05823|RN5A_HUMAN	RN5A_HUMAN	RNASEL	6.82303	2.61209	0.771208	1.26825
sp|Q8IVF7|FMNL3_HUMAN	FMNL3_HUMAN	FMNL3	4.97612	2.23072	0.757549	2.03505
sp|O43169|CYB5B_HUMAN	CYB5B_HUMAN	CYB5B	9.23555	3.039	0.75257	2.06992
sp|Q15208|STK38_HUMAN	STK38_HUMAN	STK38	4.35245	2.08625	0.752044	1.59409
sp|Q9ULE6|PALD_HUMAN	PALD_HUMAN	PALD1	6.74352	2.59683	0.746783	2.25022
sp|O14641|DVL2_HUMAN	DVL2_HUMAN	DVL2	4.82914	2.19753	0.736826	1.46383
sp|Q9GZY8|MFF_HUMAN	MFF_HUMAN	MFF	4.06934	2.01726	0.735086	1.90379
sp|Q16650|TBR1_HUMAN	TBR1_HUMAN	TBR1	0	0	0.733531	1.04989
sp|Q9NRN7|ADPPT_HUMAN	ADPPT_HUMAN	AASDHPPT	0	0	0.732577	0.822908
sp|Q15365|PCBP1_HUMAN	PCBP1_HUMAN	PCBP1	1.68591	1.29843	0.730467	-0.774438
sp|P55011|S12A2_HUMAN	S12A2_HUMAN	SLC12A2	3.17099	1.78073	0.729776	-1.10773
sp|P62847|RS24_HUMAN	RS24_HUMAN	RPS24	3.71665	1.92786	0.727738	0.9071
sp|Q9NZ45|CISD1_HUMAN	CISD1_HUMAN	CISD1	3.71916	1.92851	0.725583	1.26126
sp|Q8IY17|PLPL6_HUMAN	PLPL6_HUMAN	PNPLA6	6.00442	2.45039	0.72484	2.13366
sp|Q96A65|EXOC4_HUMAN	EXOC4_HUMAN	EXOC4	6.87667	2.62234	0.723294	1.7305
sp|Q9BZF3|OSBL6_HUMAN	OSBL6_HUMAN	OSBPL6	4.46816	2.1138	0.721722	1.78644
sp|Q12830|BPTF_HUMAN	BPTF_HUMAN	BPTF	0	0	0.72063	1.68492
sp|Q9Y4I1|MYO5A_HUMAN	MYO5A_HUMAN	MYO5A	8.91618	2.986	0.719802	1.16944
sp|O75694|NU155_HUMAN	NU155_HUMAN	NUP155	4.36126	2.08836	0.719038	2.15817
sp|P49207|RL34_HUMAN	RL34_HUMAN	RPL34	3.54262	1.88218	0.714563	0.945007
sp|Q15058|KIF14_HUMAN	KIF14_HUMAN	KIF14	19.9498	4.46652	0.714335	2.57873
sp|Q9H936|GHC1_HUMAN	GHC1_HUMAN	SLC25A22	0	0	0.714245	1.01498
sp|P62820|RAB1A_HUMAN	RAB1A_HUMAN	RAB1A	4.15096	2.03739	0.713172	1.45047
sp|Q5VT06|CE350_HUMAN	CE350_HUMAN	CEP350	1.11265	1.05482	0.71122	-1.55092
sp|Q5JRA6|MIA3_HUMAN	MIA3_HUMAN	MIA3	2.1387	1.46243	0.708624	-1.82457
sp|P07305|H10_HUMAN	H10_HUMAN	H1F0	12.1956	3.49222	0.70553	2.05999
sp|Q9UG63|ABCF2_HUMAN	ABCF2_HUMAN	ABCF2	3.54082	1.88171	0.701513	1.94678
sp|Q6ZU65|UBN2_HUMAN	UBN2_HUMAN	UBN2	0	0	0.70046	0.902743
sp|Q92889|XPF_HUMAN	XPF_HUMAN	ERCC4	0	0	0.696933	1.81526
sp|P29597|TYK2_HUMAN	TYK2_HUMAN	TYK2	9.49593	3.08155	0.693744	1.90936
sp|P51617|IRAK1_HUMAN	IRAK1_HUMAN	IRAK1	5.15163	2.26972	0.688015	1.62109
sp|Q02040|AK17A_HUMAN	AK17A_HUMAN	AKAP17A	5.07925	2.25372	0.687314	2.08969
sp|Q9HCL2|GPAT1_HUMAN	GPAT1_HUMAN	GPAM	7.27082	2.69645	0.685206	1.69161
sp|Q7Z6Z7|HUWE1_HUMAN	HUWE1_HUMAN	HUWE1	6.97297	2.64064	0.684891	2.24869
sp|O95487|SC24B_HUMAN	SC24B_HUMAN	SEC24B	4.48572	2.11795	0.680885	1.555
sp|P18564|ITB6_HUMAN	ITB6_HUMAN	ITGB6	0	0	0.6751	1.65579
sp|P16152|CBR1_HUMAN	CBR1_HUMAN	CBR1	0	0	0.674811	1.93295
sp|Q9Y265|RUVB1_HUMAN	RUVB1_HUMAN	RUVBL1	3.595	1.89605	0.668282	1.82859
sp|P18583|SON_HUMAN	SON_HUMAN	SON	8.45549	2.90783	0.667034	1.01817
sp|Q8TCU4|ALMS1_HUMAN	ALMS1_HUMAN	ALMS1	9.28477	3.04709	0.667032	2.10963
sp|Q86UB9|TM135_HUMAN	TM135_HUMAN	TMEM135	1.55209	1.24583	0.661213	-1.38333
sp|Q9UHB9|SRP68_HUMAN	SRP68_HUMAN	SRP68	1.331	1.15369	0.654085	-1.84284
sp|Q9NP64|NO40_HUMAN	NO40_HUMAN	ZCCHC17	2.30356	1.51775	0.644165	1.58406
sp|O95817|BAG3_HUMAN	BAG3_HUMAN	BAG3	0	0	0.6346	0.730145
sp|O75915|PRAF3_HUMAN	PRAF3_HUMAN	ARL6IP5	0	0	0.6328	-1.35013
sp|P51610|HCFC1_HUMAN	HCFC1_HUMAN	HCFC1	6.31031	2.51203	0.632411	2.02073
sp|Q15361|TTF1_HUMAN	TTF1_HUMAN	TTF1	6.8377	2.6149	0.631928	1.90128
sp|Q96CS3|FAF2_HUMAN	FAF2_HUMAN	FAF2	2.48562	1.57658	0.629937	1.37195
sp|Q8NEY1|NAV1_HUMAN	NAV1_HUMAN	NAV1	1.94458	1.39448	0.629176	1.12048
sp|Q05682|CALD1_HUMAN	CALD1_HUMAN	CALD1	5.47497	2.33986	0.629138	1.61503
sp|Q9H4L5|OSBL3_HUMAN	OSBL3_HUMAN	OSBPL3	4.19184	2.0474	0.629055	1.62117
sp|P30041|PRDX6_HUMAN	PRDX6_HUMAN	PRDX6	0	0	0.626073	0.841318
sp|Q9NZM3|ITSN2_HUMAN	ITSN2_HUMAN	ITSN2	0	0	0.624688	1.11741
sp|Q68DQ2|CRBG3_HUMAN	CRBG3_HUMAN	CRYBG3	11.1648	3.34137	0.623813	2.4143
sp|Q9Y3L5|RAP2C_HUMAN	RAP2C_HUMAN	RAP2C	0	0	0.622762	1.18725
sp|Q9NNW5|WDR6_HUMAN	WDR6_HUMAN	WDR6	1.86813	1.3668	0.618599	1.41109
sp|Q13085|ACACA_HUMAN	ACACA_HUMAN	ACACA	27.2981	5.22476	0.617828	0.827117
sp|Q96KP1|EXOC2_HUMAN	EXOC2_HUMAN	EXOC2	0	0	0.614701	-1.3769
sp|O00443|P3C2A_HUMAN	P3C2A_HUMAN	PIK3C2A	2.32412	1.52451	0.614584	-1.97652
sp|P22234|PUR6_HUMAN	PUR6_HUMAN	PAICS	0	0	0.612613	0.904737
sp|Q8N0X7|SPG20_HUMAN	SPG20_HUMAN	SPART	4.13883	2.03441	0.610126	1.56482
sp|Q9NZC7|WWOX_HUMAN	WWOX_HUMAN	WWOX	4.62175	2.14983	0.608667	1.38139
sp|P50416|CPT1A_HUMAN	CPT1A_HUMAN	CPT1A	4.38194	2.09331	0.607661	1.64762
sp|Q9NXE4|NSMA3_HUMAN	NSMA3_HUMAN	SMPD4	0	0	0.606564	0.993595
sp|Q99848|EBP2_HUMAN	EBP2_HUMAN	EBNA1BP2	0	0	0.606479	1.42826
sp|Q68EM7|RHG17_HUMAN	RHG17_HUMAN	ARHGAP17	0	0	0.604646	0.742605
sp|Q99618|CDCA3_HUMAN	CDCA3_HUMAN	CDCA3	0	0	0.60367	1.03205
sp|Q8N2F6|ARM10_HUMAN	ARM10_HUMAN	ARMC10	3.49104	1.86843	0.600216	1.41018
sp|P11387|TOP1_HUMAN	TOP1_HUMAN	TOP1	3.95812	1.9895	0.595106	1.5805
sp|P08195|4F2_HUMAN	4F2_HUMAN	SLC3A2	6.21005	2.492	0.593096	0.804094
sp|Q9NVI7|ATD3A_HUMAN	ATD3A_HUMAN	ATAD3A	2.50325	1.58217	0.593047	-1.29336
sp|P21397|AOFA_HUMAN	AOFA_HUMAN	MAOA	9.32762	3.05411	0.592246	2.7273
sp|Q969Z3|MARC2_HUMAN	MARC2_HUMAN	MARC2	4.47933	2.11644	0.591284	1.15529
sp|Q92968|PEX13_HUMAN	PEX13_HUMAN	PEX13	0	0	0.589859	-1.17972
sp|Q9BW92|SYTM_HUMAN	SYTM_HUMAN	TARS2	2.2294	1.49312	0.588697	1.41321
sp|O14966|RAB7L_HUMAN	RAB7L_HUMAN	RAB29	3.85849	1.9643	0.584418	1.40306
sp|P55209|NP1L1_HUMAN	NP1L1_HUMAN	NAP1L1	0	0	0.583507	-1.43911
sp|Q13428|TCOF_HUMAN	TCOF_HUMAN	TCOF1	7.03746	2.65282	0.58329	-0.750096
sp|Q5VT66|MARC1_HUMAN	MARC1_HUMAN	MARC1	4.44297	2.10784	0.582895	-1.24674
sp|Q8TBA6|GOGA5_HUMAN	GOGA5_HUMAN	GOLGA5	5.18573	2.27722	0.581139	1.88236
sp|Q07960|RHG01_HUMAN	RHG01_HUMAN	ARHGAP1	10.7852	3.28409	0.581039	2.28784
sp|Q8N9N7|LRC57_HUMAN	LRC57_HUMAN	LRRC57	1.42309	1.19293	0.579878	1.18423
sp|P43003|EAA1_HUMAN	EAA1_HUMAN	SLC1A3	0	0	0.579507	0.894625
sp|Q03001|DYST_HUMAN	DYST_HUMAN	DST	10.333	3.2145	0.577119	2.22716
sp|Q9NPI1|BRD7_HUMAN	BRD7_HUMAN	BRD7	0	0	0.574948	0.711624
sp|P20020|AT2B1_HUMAN	AT2B1_HUMAN	ATP2B1	4.63884	2.1538	0.574728	1.72547
sp|Q8IWZ3|ANKH1_HUMAN	ANKH1_HUMAN	ANKHD1	7.25913	2.69428	0.571777	2.47783
sp|Q14683|SMC1A_HUMAN	SMC1A_HUMAN	SMC1A	4.25839	2.06359	0.570334	1.72596
sp|Q9ULH7|MKL2_HUMAN	MKL2_HUMAN	MRTFB	4.73556	2.17613	0.568695	1.75167
sp|Q8IWX8|CHERP_HUMAN	CHERP_HUMAN	CHERP	2.28391	1.51126	0.56818	1.18842
sp|Q9NQC3|RTN4_HUMAN	RTN4_HUMAN	RTN4	0.707136	0.840914	0.56667	-1.87313
sp|Q5JTW2|CEP78_HUMAN	CEP78_HUMAN	CEP78	6.04903	2.45948	0.566658	1.72183
sp|Q16891|MIC60_HUMAN	MIC60_HUMAN	IMMT	8.79662	2.96591	0.564325	1.44374
sp|Q6UB35|C1TM_HUMAN	C1TM_HUMAN	MTHFD1L	0	0	0.563474	-1.25933
sp|Q96HC4|PDLI5_HUMAN	PDLI5_HUMAN	PDLIM5	3.25817	1.80504	0.560305	1.48029
sp|Q8IZJ1|UNC5B_HUMAN	UNC5B_HUMAN	UNC5B	3.21213	1.79224	0.559034	1.46091
sp|P51003|PAPOA_HUMAN	PAPOA_HUMAN	PAPOLA	1.31843	1.14823	0.55881	-0.973555
sp|P35606|COPB2_HUMAN	COPB2_HUMAN	COPB2	0	0	0.554853	-0.839339
sp|Q9NS69|TOM22_HUMAN	TOM22_HUMAN	TOMM22	0	0	0.549766	-1.35472
sp|P18124|RL7_HUMAN	RL7_HUMAN	RPL7	2.79432	1.67162	0.548928	0.907888
sp|O75534|CSDE1_HUMAN	CSDE1_HUMAN	CSDE1	5.12979	2.2649	0.548545	1.86509
sp|Q8NEN9|PDZD8_HUMAN	PDZD8_HUMAN	PDZD8	8.52757	2.9202	0.546429	1.72441
sp|Q8NC51|PAIRB_HUMAN	PAIRB_HUMAN	SERBP1	3.26805	1.80777	0.543415	1.57669
sp|Q96AY4|TTC28_HUMAN	TTC28_HUMAN	TTC28	5.84884	2.41844	0.539393	2.0892
sp|Q14739|LBR_HUMAN	LBR_HUMAN	LBR	3.36321	1.83391	0.536568	-1.17587
sp|Q70CQ3|UBP30_HUMAN	UBP30_HUMAN	USP30	2.5791	1.60596	0.536034	1.34372
sp|Q86YS7|C2CD5_HUMAN	C2CD5_HUMAN	C2CD5	5.98822	2.44708	0.534046	1.31621
sp|Q13459|MYO9B_HUMAN	MYO9B_HUMAN	MYO9B	6.77351	2.6026	0.533756	1.72452
sp|O00763|ACACB_HUMAN	ACACB_HUMAN	ACACB	11.244	3.35321	0.532747	2.08591
sp|Q9Y520|PRC2C_HUMAN	PRC2C_HUMAN	PRRC2C	8.16066	2.85669	0.531243	2.02954
sp|Q9UQ35|SRRM2_HUMAN	SRRM2_HUMAN	SRRM2	7.45561	2.7305	0.528761	2.09487
sp|Q8IYU8|MICU2_HUMAN	MICU2_HUMAN	MICU2	14.6138	3.8228	0.527793	0.889635
sp|Q8N0Z3|SPICE_HUMAN	SPICE_HUMAN	SPICE1	7.76792	2.7871	0.519942	1.65004
sp|Q9UJF2|NGAP_HUMAN	NGAP_HUMAN	RASAL2	4.76595	2.18311	0.517738	1.6651
sp|P61353|RL27_HUMAN	RL27_HUMAN	RPL27	3.36545	1.83452	0.51684	1.29364
sp|A1X283|SPD2B_HUMAN	SPD2B_HUMAN	SH3PXD2B	1.39151	1.17962	0.515945	1.15101
sp|O94991|SLIK5_HUMAN	SLIK5_HUMAN	SLITRK5	4.20835	2.05143	0.515661	1.50542
sp|Q9NTJ3|SMC4_HUMAN	SMC4_HUMAN	SMC4	1.06531	1.03214	0.515369	-1.85137
sp|O95573|ACSL3_HUMAN	ACSL3_HUMAN	ACSL3	3.82177	1.95494	0.515365	1.5568
sp|Q07820|MCL1_HUMAN	MCL1_HUMAN	MCL1	2.07514	1.44053	0.514569	-1.14335
sp|O15042|SR140_HUMAN	SR140_HUMAN	U2SURP	26.4326	5.14127	0.512614	1.22966
sp|Q14137|BOP1_HUMAN	BOP1_HUMAN	BOP1	2.3471	1.53203	0.511784	1.24715
sp|P27635|RL10_HUMAN	RL10_HUMAN	RPL10	5.56585	2.35921	0.506952	0.475538
sp|P13797|PLST_HUMAN	PLST_HUMAN	PLS3	0.9211	0.95974	0.505535	-1.13049
sp|P42566|EPS15_HUMAN	EPS15_HUMAN	EPS15	3.93106	1.98269	0.503849	1.25373
sp|O43175|SERA_HUMAN	SERA_HUMAN	PHGDH	0.773591	0.87954	0.503711	-1.22553
sp|Q9UL54|TAOK2_HUMAN	TAOK2_HUMAN	TAOK2	5.2239	2.28558	0.503412	1.53804
sp|P50747|BPL1_HUMAN	BPL1_HUMAN	HLCS	3.27662	1.81014	0.502178	1.27144
sp|Q15417|CNN3_HUMAN	CNN3_HUMAN	CNN3	3.8669	1.96644	0.499451	1.47447
sp|Q86T24|KAISO_HUMAN	KAISO_HUMAN	ZBTB33	1.82564	1.35116	0.49907	0.934494
sp|P46060|RAGP1_HUMAN	RAGP1_HUMAN	RANGAP1	1.13116	1.06356	0.496712	-1.96508
sp|P63244|RACK1_HUMAN	RACK1_HUMAN	RACK1	0.68611	0.828317	0.495123	-1.4382
sp|Q92900|RENT1_HUMAN	RENT1_HUMAN	UPF1	0	0	0.494942	-1.17674
sp|O14640|DVL1_HUMAN;sp|P54792|DVLP1_HUMAN	DVL1_HUMAN	DVL1	6.03271	2.45616	0.492194	1.19101
sp|Q6P1N0|C2D1A_HUMAN	C2D1A_HUMAN	CC2D1A	0	0	0.491971	-0.869878
sp|P29317|EPHA2_HUMAN	EPHA2_HUMAN	EPHA2	0	0	0.491018	0.658034
sp|Q9UH62|ARMX3_HUMAN	ARMX3_HUMAN	ARMCX3	3.91352	1.97826	0.489537	1.49132
sp|Q96BY7|ATG2B_HUMAN	ATG2B_HUMAN	ATG2B	4.93867	2.22231	0.489231	1.78514
sp|P50851|LRBA_HUMAN	LRBA_HUMAN	LRBA	7.16936	2.67757	0.489149	2.00988
sp|P24723|KPCL_HUMAN	KPCL_HUMAN	PRKCH	0	0	0.486981	0.421803
sp|O95486|SC24A_HUMAN	SC24A_HUMAN	SEC24A	0	0	0.482504	0.667519
sp|Q92615|LAR4B_HUMAN	LAR4B_HUMAN	LARP4B	0	0	0.481731	0.60162
sp|Q9H7Z3|NRDE2_HUMAN	NRDE2_HUMAN	NRDE2	1.02485	1.01235	0.481393	-1.45025
sp|Q9Y450|HBS1L_HUMAN	HBS1L_HUMAN	HBS1L	3.25852	1.80514	0.478798	1.298
sp|P46109|CRKL_HUMAN	CRKL_HUMAN	CRKL	5.09854	2.258	0.47811	1.01364
sp|O00213|APBB1_HUMAN	APBB1_HUMAN	APBB1	2.34883	1.53259	0.477964	1.33442
sp|O43426|SYNJ1_HUMAN	SYNJ1_HUMAN	SYNJ1	14.3809	3.79222	0.477652	1.51268
sp|Q14684|RRP1B_HUMAN	RRP1B_HUMAN	RRP1B	6.03914	2.45747	0.477305	0.684226
sp|Q9BXK5|B2L13_HUMAN	B2L13_HUMAN	BCL2L13	4.95961	2.22702	0.472568	0.85456
sp|P46108|CRK_HUMAN	CRK_HUMAN	CRK	3.9864	1.9966	0.471442	0.907441
sp|Q7Z2W4|ZCCHV_HUMAN	ZCCHV_HUMAN	ZC3HAV1	7.80985	2.79461	0.471414	1.26667
sp|P62854|RS26_HUMAN;sp|Q5JNZ5|RS26L_HUMAN	RS26_HUMAN	RPS26	2.71005	1.64622	0.471242	0.526663
sp|Q09666|AHNK_HUMAN	AHNK_HUMAN	AHNAK	14.8926	3.85909	0.470689	1.5337
sp|P0DMV9|HS71B_HUMAN;sp|P0DMV8|HS71A_HUMAN	HS71B_HUMAN	HSPA1B	0	0	0.469838	-0.862842
sp|Q9Y2L1|RRP44_HUMAN	RRP44_HUMAN	DIS3	0	0	0.469808	0.994146
sp|Q96A33|CCD47_HUMAN	CCD47_HUMAN	CCDC47	2.55153	1.59735	0.46924	-1.34453
sp|Q14247|SRC8_HUMAN	SRC8_HUMAN	CTTN	4.96365	2.22793	0.46911	1.14511
sp|Q71UM5|RS27L_HUMAN	RS27L_HUMAN	RPS27L	0	0	0.468964	-1.66843
sp|Q96P47|AGAP3_HUMAN	AGAP3_HUMAN	AGAP3	3.77978	1.94417	0.468555	1.24553
sp|Q01650|LAT1_HUMAN	LAT1_HUMAN	SLC7A5	4.68572	2.16465	0.468469	1.37941
sp|Q7Z7G8|VP13B_HUMAN	VP13B_HUMAN	VPS13B	0.935585	0.967256	0.468022	-1.1294
sp|P52306|GDS1_HUMAN	GDS1_HUMAN	RAP1GDS1	30.9254	5.56106	0.468015	2.20373
sp|E9PRG8|CK098_HUMAN	CK098_HUMAN	C11orf98	0.938977	0.969008	0.4679	0.981322
sp|P48067|SC6A9_HUMAN	SC6A9_HUMAN	SLC6A9	0	0	0.466164	0.745541
sp|O15235|RT12_HUMAN	RT12_HUMAN	MRPS12	7.60774	2.75821	0.46551	1.41197
sp|Q8WY36|BBX_HUMAN	BBX_HUMAN	BBX	3.81135	1.95227	0.463872	1.57472
sp|O15498|YKT6_HUMAN	YKT6_HUMAN	YKT6	4.14782	2.03662	0.463772	0.525925
sp|Q9BQ48|RM34_HUMAN	RM34_HUMAN	MRPL34	7.11748	2.66786	0.46355	1.26905
sp|P49756|RBM25_HUMAN	RBM25_HUMAN	RBM25	0	0	0.461919	-1.28432
sp|Q9ULM3|YETS2_HUMAN	YETS2_HUMAN	YEATS2	1.12067	1.05862	0.460648	-1.49226
sp|Q14677|EPN4_HUMAN	EPN4_HUMAN	CLINT1	3.82122	1.95479	0.46057	1.34773
sp|Q2M2I8|AAK1_HUMAN	AAK1_HUMAN	AAK1	1.03231	1.01603	0.457542	1.0139
sp|P43487|RANG_HUMAN	RANG_HUMAN	RANBP1	3.77979	1.94417	0.457201	1.59675
sp|Q9Y6M5|ZNT1_HUMAN	ZNT1_HUMAN	SLC30A1	0	0	0.454596	0.891437
sp|P16949|STMN1_HUMAN	STMN1_HUMAN	STMN1	3.18695	1.7852	0.453365	1.09141
sp|Q86UK7|ZN598_HUMAN	ZN598_HUMAN	ZNF598	2.81112	1.67664	0.453362	1.25398
sp|P62805|H4_HUMAN	H4_HUMAN	HIST1H4A	3.64131	1.90822	0.453045	1.21559
sp|P47712|PA24A_HUMAN	PA24A_HUMAN	PLA2G4A	1.07724	1.0379	0.45238	-1.08063
sp|Q15056|IF4H_HUMAN	IF4H_HUMAN	EIF4H	4.17053	2.04219	0.450973	1.1906
sp|Q8TEU7|RPGF6_HUMAN	RPGF6_HUMAN	RAPGEF6	8.07336	2.84137	0.450638	1.48774
sp|Q5SVZ6|ZMYM1_HUMAN	ZMYM1_HUMAN	ZMYM1	6.13879	2.47766	0.450268	1.39855
sp|P49959|MRE11_HUMAN	MRE11_HUMAN	MRE11	4.649	2.15616	0.449466	0.930359
sp|Q9Y2H6|FND3A_HUMAN	FND3A_HUMAN	FNDC3A	2.6661	1.63282	0.446993	-1.50709
sp|Q9NRZ9|HELLS_HUMAN	HELLS_HUMAN	HELLS	0	0	0.446531	-1.22768
sp|O94906|PRP6_HUMAN	PRP6_HUMAN	PRPF6	9.87144	3.14189	0.4452	1.44366
sp|P48643|TCPE_HUMAN	TCPE_HUMAN	CCT5	0	0	0.444437	-1.04378
sp|P57772|SELB_HUMAN	SELB_HUMAN	EEFSEC	0	0	0.444146	-1.35521
sp|Q6P2Q9|PRP8_HUMAN	PRP8_HUMAN	PRPF8	3.1331	1.77006	0.443341	-1.18975
sp|P10412|H14_HUMAN	H14_HUMAN	HIST1H1E	20.327	4.50855	0.441047	0.776569
sp|Q6P3W7|SCYL2_HUMAN	SCYL2_HUMAN	SCYL2	3.65393	1.91152	0.439786	1.53512
sp|P14625|ENPL_HUMAN	ENPL_HUMAN	HSP90B1	3.12204	1.76693	0.43874	1.21098
sp|P49792|RBP2_HUMAN	RBP2_HUMAN	RANBP2	8.42891	2.90326	0.438175	1.75904
sp|P07737|PROF1_HUMAN	PROF1_HUMAN	PFN1	2.81968	1.67919	0.435771	1.20042
sp|P04049|RAF1_HUMAN	RAF1_HUMAN	RAF1	0	0	0.431126	0.52534
sp|A0FGR8|ESYT2_HUMAN	ESYT2_HUMAN	ESYT2	4.3026	2.07427	0.428526	1.12865
sp|P78527|PRKDC_HUMAN	PRKDC_HUMAN	PRKDC	9.64563	3.10574	0.426688	1.05988
sp|Q07812|BAX_HUMAN	BAX_HUMAN	BAX	3.72289	1.92948	0.426386	1.38908
sp|Q9UBC2|EP15R_HUMAN	EP15R_HUMAN	EPS15L1	4.42359	2.10323	0.425921	1.2684
sp|Q14789|GOGB1_HUMAN	GOGB1_HUMAN	GOLGB1	12.1464	3.48517	0.425103	1.59473
sp|P60468|SC61B_HUMAN	SC61B_HUMAN	SEC61B	0	0	0.424816	-1.24941
sp|P55072|TERA_HUMAN	TERA_HUMAN	VCP	2.36105	1.53657	0.424164	0.798296
sp|P68431|H31_HUMAN;sp|Q71DI3|H32_HUMAN;sp|Q16695|H31T_HUMAN;sp|P84243|H33_HUMAN;sp|Q6NXT2|H3C_HUMAN	H31_HUMAN	HIST1H3A	0	0	0.424115	-1.3061
sp|P04406|G3P_HUMAN	G3P_HUMAN	GAPDH	5.25324	2.292	0.422017	1.30371
sp|Q13492|PICAL_HUMAN	PICAL_HUMAN	PICALM	7.59267	2.75548	0.421661	-0.759037
sp|P19338|NUCL_HUMAN	NUCL_HUMAN	NCL	4.02546	2.00635	0.419972	1.37819
sp|P61313|RL15_HUMAN	RL15_HUMAN	RPL15	2.23074	1.49357	0.41846	0.760539
sp|P25205|MCM3_HUMAN	MCM3_HUMAN	MCM3	0.758093	0.870685	0.417188	-0.919871
sp|P46779|RL28_HUMAN	RL28_HUMAN	RPL28	3.58629	1.89375	0.416111	0.599621
sp|P10599|THIO_HUMAN	THIO_HUMAN	TXN	0	0	0.414891	-0.777991
sp|Q9NRY4|RHG35_HUMAN	RHG35_HUMAN	ARHGAP35	0	0	0.412917	-1.2805
sp|Q9BZE4|NOG1_HUMAN	NOG1_HUMAN	GTPBP4	3.48655	1.86723	0.412691	1.4209
sp|Q07021|C1QBP_HUMAN	C1QBP_HUMAN	C1QBP	0	0	0.412612	-0.726121
sp|Q8IY81|SPB1_HUMAN	SPB1_HUMAN	FTSJ3	5.26251	2.29402	0.412154	0.844559
sp|Q9Y4E8|UBP15_HUMAN	UBP15_HUMAN	USP15	4.76783	2.18354	0.412054	1.57221
sp|P46781|RS9_HUMAN	RS9_HUMAN	RPS9	3.58733	1.89403	0.412045	1.15174
sp|Q8NI27|THOC2_HUMAN	THOC2_HUMAN	THOC2	8.05478	2.83809	0.411535	1.29595
sp|Q9BRS2|RIOK1_HUMAN	RIOK1_HUMAN	RIOK1	5.15884	2.27131	0.409367	0.793549
sp|Q8TAT6|NPL4_HUMAN	NPL4_HUMAN	NPLOC4	0	0	0.40769	-1.15835
sp|Q8WVM8|SCFD1_HUMAN	SCFD1_HUMAN	SCFD1	1.79177	1.33857	0.40767	0.644338
sp|Q9Y5V3|MAGD1_HUMAN	MAGD1_HUMAN	MAGED1	6.66076	2.58084	0.407063	0.762749
sp|O14976|GAK_HUMAN	GAK_HUMAN	GAK	0	0	0.405976	-1.12218
sp|Q9Y4W2|LAS1L_HUMAN	LAS1L_HUMAN	LAS1L	1.38123	1.17526	0.404994	0.85242
sp|P46782|RS5_HUMAN	RS5_HUMAN	RPS5	1.00346	1.00173	0.402451	-1.21928
sp|Q96JH7|VCIP1_HUMAN	VCIP1_HUMAN	VCPIP1	5.07518	2.25282	0.400562	1.68436
sp|P07814|SYEP_HUMAN	SYEP_HUMAN	EPRS	1.08823	1.04318	0.399491	-1.2738
sp|P63000|RAC1_HUMAN;sp|P60763|RAC3_HUMAN;sp|P15153|RAC2_HUMAN	RAC1_HUMAN	RAC1	0	0	0.398537	2.0222
sp|P61927|RL37_HUMAN	RL37_HUMAN	RPL37	6.23498	2.49699	0.397565	-1.02656
sp|Q14318|FKBP8_HUMAN	FKBP8_HUMAN	FKBP8	3.21347	1.79262	0.39652	0.753876
sp|Q5C9Z4|NOM1_HUMAN	NOM1_HUMAN	NOM1	4.57412	2.13872	0.396291	0.936905
sp|P40926|MDHM_HUMAN	MDHM_HUMAN	MDH2	0	0	0.395994	-0.829066
sp|P84077|ARF1_HUMAN;sp|P61204|ARF3_HUMAN	ARF1_HUMAN	ARF1	2.71718	1.64839	0.394643	0.673999
sp|Q59GN2|R39L5_HUMAN;sp|P62891|RL39_HUMAN	R39L5_HUMAN	RPL39P5	0	0	0.39418	1.05349
sp|P42694|HELZ_HUMAN	HELZ_HUMAN	HELZ	1.81582	1.34753	0.394135	1.04257
sp|Q9Y4L1|HYOU1_HUMAN	HYOU1_HUMAN	HYOU1	4.16623	2.04113	0.391933	-0.682609
sp|Q96N67|DOCK7_HUMAN	DOCK7_HUMAN	DOCK7	1.9201	1.38568	0.390621	-1.95195
sp|Q9UBF2|COPG2_HUMAN	COPG2_HUMAN	COPG2	4.21642	2.05339	0.390459	1.24349
sp|P83731|RL24_HUMAN	RL24_HUMAN	RPL24	4.64531	2.1553	0.39024	0.439255
sp|Q2NKX8|ERC6L_HUMAN	ERC6L_HUMAN	ERCC6L	3.96261	1.99063	0.389474	-1.36668
sp|P47914|RL29_HUMAN	RL29_HUMAN	RPL29	2.51408	1.58558	0.389189	0.590487
sp|P82094|TMF1_HUMAN	TMF1_HUMAN	TMF1	7.77005	2.78748	0.387241	1.13631
sp|Q7Z569|BRAP_HUMAN	BRAP_HUMAN	BRAP	1.09114	1.04458	0.385628	-0.857373
sp|A6NGR9|MROH6_HUMAN	MROH6_HUMAN	#N/A	#N/A	#N/A	0.382488	0.821774
sp|Q3V6T2|GRDN_HUMAN	GRDN_HUMAN	CCDC88A	0.764662	0.87445	0.381614	-1.09733
sp|Q9P2E9|RRBP1_HUMAN	RRBP1_HUMAN	RRBP1	1.28178	1.13216	0.381414	-1.80053
sp|O43396|TXNL1_HUMAN	TXNL1_HUMAN	TXNL1	4.93951	2.2225	0.380794	1.18112
sp|P30048|PRDX3_HUMAN	PRDX3_HUMAN	PRDX3	4.86656	2.20603	0.380564	0.910911
sp|Q7Z589|EMSY_HUMAN	EMSY_HUMAN	EMSY	16.0225	4.00281	0.380252	1.2419
sp|Q5UIP0|RIF1_HUMAN	RIF1_HUMAN	RIF1	1.25335	1.11953	0.380241	0.694253
sp|Q12965|MYO1E_HUMAN	MYO1E_HUMAN	MYO1E	0	0	0.379502	-0.671888
sp|Q32MZ4|LRRF1_HUMAN	LRRF1_HUMAN	LRRFIP1	0	0	0.37936	0.800711
sp|Q3ZCQ8|TIM50_HUMAN	TIM50_HUMAN	TIMM50	0.770011	0.877503	0.377018	-0.934185
sp|Q8TCG1|CIP2A_HUMAN	CIP2A_HUMAN	CIP2A	5.07644	2.2531	0.376523	1.20606
sp|Q9GZR7|DDX24_HUMAN	DDX24_HUMAN	DDX24	3.07665	1.75404	0.376105	-1.2289
sp|Q5JTV8|TOIP1_HUMAN	TOIP1_HUMAN	TOR1AIP1	3.00176	1.73256	0.375556	0.860034
sp|P11498|PYC_HUMAN	PYC_HUMAN	PC	17.8644	4.22663	0.375521	0.627829
sp|P07195|LDHB_HUMAN	LDHB_HUMAN	LDHB	2.41404	1.55372	0.375333	1.0447
sp|Q5HYI8|RABL3_HUMAN	RABL3_HUMAN	RABL3	0.702109	0.83792	0.37172	1.13388
sp|Q9UEY8|ADDG_HUMAN	ADDG_HUMAN	ADD3	1.69755	1.3029	0.371682	0.970723
sp|Q8N5K1|CISD2_HUMAN	CISD2_HUMAN	CISD2	3.69156	1.92134	0.370567	1.07646
sp|Q5THJ4|VP13D_HUMAN	VP13D_HUMAN	VPS13D	9.97458	3.15826	0.36993	1.55662
sp|Q9NR30|DDX21_HUMAN	DDX21_HUMAN	DDX21	6.75051	2.59817	0.369813	0.457035
sp|Q1ED39|KNOP1_HUMAN	KNOP1_HUMAN	KNOP1	1.87002	1.36749	0.368207	-0.996901
sp|Q9Y4W6|AFG32_HUMAN	AFG32_HUMAN	AFG3L2	3.06354	1.7503	0.367843	-1.14658
sp|Q9Y6B6|SAR1B_HUMAN	SAR1B_HUMAN	SAR1B	0	0	0.36703	0.755827
sp|Q13823|NOG2_HUMAN	NOG2_HUMAN	GNL2	1.41995	1.19161	0.364611	-1.14875
sp|P39019|RS19_HUMAN	RS19_HUMAN	RPS19	2.87864	1.69665	0.364518	-0.780462
sp|P62826|RAN_HUMAN	RAN_HUMAN	RAN	7.40323	2.72089	0.363823	0.997747
sp|P15924|DESP_HUMAN	DESP_HUMAN	DSP	5.79689	2.40767	0.363703	-1.47004
sp|Q8TEV9|SMCR8_HUMAN	SMCR8_HUMAN	SMCR8	4.44931	2.10934	0.362546	1.49205
sp|P24928|RPB1_HUMAN	RPB1_HUMAN	POLR2A	4.07914	2.01969	0.36232	1.30494
sp|P13667|PDIA4_HUMAN	PDIA4_HUMAN	PDIA4	0	0	0.361891	0.619238
sp|Q9Y4P8|WIPI2_HUMAN	WIPI2_HUMAN	WIPI2	1.71054	1.30788	0.360189	-1.1424
sp|Q15738|NSDHL_HUMAN	NSDHL_HUMAN	NSDHL	0	0	0.359754	-1.02061
sp|Q9UNZ5|L10K_HUMAN	L10K_HUMAN	C19orf53	0	0	0.358618	0.7314
sp|Q9UKY7|CDV3_HUMAN	CDV3_HUMAN	CDV3	0	0	0.357355	0.5996
sp|P61619|S61A1_HUMAN	S61A1_HUMAN	SEC61A1	1.18908	1.09045	0.355376	1.01597
sp|Q7RTP6|MICA3_HUMAN	MICA3_HUMAN	MICAL3	0	0	0.354652	-0.526378
sp|P62829|RL23_HUMAN	RL23_HUMAN	RPL23	4.9603	2.22717	0.353719	0.391974
sp|O75533|SF3B1_HUMAN	SF3B1_HUMAN	SF3B1	4.43423	2.10576	0.352031	0.805897
sp|Q6PKG0|LARP1_HUMAN	LARP1_HUMAN	LARP1	4.25951	2.06386	0.350303	1.30506
sp|Q8IZA0|K319L_HUMAN	K319L_HUMAN	KIAA0319L	1.2755	1.12938	0.347087	-0.786127
sp|Q92616|GCN1_HUMAN	GCN1_HUMAN	GCN1	3.00688	1.73403	0.346035	-1.18287
sp|P68363|TBA1B_HUMAN	TBA1B_HUMAN	TUBA1B	6.03798	2.45723	0.345936	0.296712
sp|Q15907|RB11B_HUMAN	RB11B_HUMAN	RAB11B	0	0	0.344216	1.54452
sp|Q9BXW9|FACD2_HUMAN	FACD2_HUMAN	FANCD2	5.56174	2.35833	0.343963	0.827268
sp|Q9NQG6|MID51_HUMAN	MID51_HUMAN	MIEF1	9.13013	3.02161	0.343619	0.984537
sp|Q8WTT2|NOC3L_HUMAN	NOC3L_HUMAN	NOC3L	5.03098	2.24298	0.342756	0.94064
sp|P12277|KCRB_HUMAN	KCRB_HUMAN	CKB	3.01316	1.73585	0.342518	0.605284
sp|Q96EA4|SPDLY_HUMAN	SPDLY_HUMAN	SPDL1	0	0	0.341739	0.639009
sp|Q8IWS0|PHF6_HUMAN	PHF6_HUMAN	PHF6	5.87739	2.42433	0.339661	1.13217
sp|O43933|PEX1_HUMAN	PEX1_HUMAN	PEX1	3.93624	1.984	0.338404	1.10069
sp|Q9H6T3|RPAP3_HUMAN	RPAP3_HUMAN	RPAP3	4.84544	2.20124	0.338341	-1.08916
sp|Q7Z4H7|HAUS6_HUMAN	HAUS6_HUMAN	HAUS6	5.58867	2.36404	0.335569	1.28575
sp|P61019|RAB2A_HUMAN	RAB2A_HUMAN	RAB2A	0	0	0.335056	-1.62741
sp|P62081|RS7_HUMAN	RS7_HUMAN	RPS7	23.9725	4.89617	0.333854	-0.525081
sp|P52789|HXK2_HUMAN	HXK2_HUMAN	HK2	6.06622	2.46297	0.333449	-1.15059
sp|Q658Y4|F91A1_HUMAN	F91A1_HUMAN	FAM91A1	2.28176	1.51055	0.331209	-1.22015
sp|O75683|SURF6_HUMAN	SURF6_HUMAN	SURF6	5.49531	2.34421	0.328947	1.20508
sp|Q8NFA0|UBP32_HUMAN	UBP32_HUMAN	USP32	0	0	0.328042	-0.646431
sp|Q13206|DDX10_HUMAN	DDX10_HUMAN	DDX10	0	0	0.327741	1.04144
sp|Q99879|H2B1M_HUMAN;sp|Q99880|H2B1L_HUMAN;sp|Q99877|H2B1N_HUMAN;sp|Q93079|H2B1H_HUMAN;sp|Q5QNW6|H2B2F_HUMAN;sp|P62807|H2B1C_HUMAN;sp|P58876|H2B1D_HUMAN;sp|P57053|H2BFS_HUMAN;sp|O60814|H2B1K_HUMAN	H2B1M_HUMAN	#N/A	#N/A	#N/A	0.326959	0.95138
sp|Q8N5F7|NKAP_HUMAN	NKAP_HUMAN	NKAP	0	0	0.321561	0.877947
sp|O14617|AP3D1_HUMAN	AP3D1_HUMAN	AP3D1	6.26673	2.50334	0.321145	0.43362
sp|Q7Z478|DHX29_HUMAN	DHX29_HUMAN	DHX29	1.46911	1.21207	0.320786	1.01474
sp|O14654|IRS4_HUMAN	IRS4_HUMAN	IRS4	9.08431	3.01402	0.320709	1.32209
sp|Q7L7X3|TAOK1_HUMAN	TAOK1_HUMAN	TAOK1	0	0	0.319905	0.478886
sp|Q13283|G3BP1_HUMAN	G3BP1_HUMAN	G3BP1	0	0	0.319195	-0.597518
sp|Q6WKZ4|RFIP1_HUMAN	RFIP1_HUMAN	RAB11FIP1	4.9058	2.2149	0.318785	1.00903
sp|Q9UBM7|DHCR7_HUMAN	DHCR7_HUMAN	DHCR7	0.677033	0.82282	0.317512	-1.00754
sp|Q9H2M9|RBGPR_HUMAN	RBGPR_HUMAN	RAB3GAP2	3.02451	1.73911	0.316742	-1.24158
sp|Q96AC1|FERM2_HUMAN	FERM2_HUMAN	FERMT2	6.54229	2.55779	0.313143	0.675735
sp|Q9UPN3|MACF1_HUMAN	MACF1_HUMAN	MACF1	4.33226	2.08141	0.313119	-1.28223
sp|O00571|DDX3X_HUMAN;sp|O15523|DDX3Y_HUMAN	DDX3X_HUMAN	DDX3X	2.12294	1.45703	0.311288	1.07129
sp|Q12923|PTN13_HUMAN	PTN13_HUMAN	PTPN13	8.25582	2.87329	0.310631	1.11839
sp|P62258|1433E_HUMAN	1433E_HUMAN	YWHAE	1.95382	1.39779	0.309671	0.803441
sp|Q9H2G2|SLK_HUMAN	SLK_HUMAN	SLK	5.43298	2.33087	0.308973	1.21161
sp|P36873|PP1G_HUMAN;sp|P62136|PP1A_HUMAN	PP1G_HUMAN	PPP1CC	0	0	0.30545	-0.394286
sp|P04075|ALDOA_HUMAN	ALDOA_HUMAN	ALDOA	2.01145	1.41825	0.301251	0.821669
sp|P61254|RL26_HUMAN	RL26_HUMAN	RPL26	6.48701	2.54696	0.301019	0.405286
sp|Q9BXF6|RFIP5_HUMAN	RFIP5_HUMAN	RAB11FIP5	5.2755	2.29685	0.300754	0.959808
sp|Q9P2D6|F135A_HUMAN	F135A_HUMAN	FAM135A	0	0	0.299812	-0.870546
sp|Q9H2J7|S6A15_HUMAN	S6A15_HUMAN	SLC6A15	4.45376	2.11039	0.299642	0.528348
sp|P35030|TRY3_HUMAN	TRY3_HUMAN	PRSS3	0	0	0.299339	-1.08065
sp|Q6DN90|IQEC1_HUMAN	IQEC1_HUMAN	IQSEC1	2.39941	1.549	0.298797	0.506637
sp|Q86SQ0|PHLB2_HUMAN	PHLB2_HUMAN	PHLDB2	3.20699	1.79081	0.297353	0.951647
sp|P25398|RS12_HUMAN	RS12_HUMAN	RPS12	2.54079	1.59399	0.297073	0.653321
sp|Q709C8|VP13C_HUMAN	VP13C_HUMAN	VPS13C	19.5098	4.41698	0.294233	1.25454
sp|P23634|AT2B4_HUMAN	AT2B4_HUMAN	ATP2B4	0	0	0.293986	-0.302783
sp|Q9H3S7|PTN23_HUMAN	PTN23_HUMAN	PTPN23	1.06352	1.03127	0.293397	0.739404
sp|P51648|AL3A2_HUMAN	AL3A2_HUMAN	ALDH3A2	3.9987	1.99967	0.293107	0.283275
sp|Q9BWH2|FUND2_HUMAN	FUND2_HUMAN	FUNDC2	2.48098	1.57511	0.292692	0.611497
sp|Q86YS6|RAB43_HUMAN	RAB43_HUMAN	RAB43	0	0	0.290702	0.841247
sp|Q8TEQ6|GEMI5_HUMAN	GEMI5_HUMAN	GEMIN5	4.86046	2.20464	0.29027	-1.15741
sp|Q71U36|TBA1A_HUMAN	TBA1A_HUMAN	TUBA1A	0	0	0.289711	-0.670084
sp|P62917|RL8_HUMAN	RL8_HUMAN	RPL8	4.4184	2.102	0.288795	0.898339
sp|Q13427|PPIG_HUMAN	PPIG_HUMAN	PPIG	8.64311	2.93992	0.287875	0.908501
sp|Q8WVS4|WDR60_HUMAN	WDR60_HUMAN	WDR60	3.50469	1.87208	0.287531	0.854532
sp|Q14315|FLNC_HUMAN	FLNC_HUMAN	FLNC	0	0	0.2863	-1.01278
sp|Q00535|CDK5_HUMAN	CDK5_HUMAN	CDK5	2.52237	1.5882	0.285237	-0.41039
sp|Q15233|NONO_HUMAN	NONO_HUMAN	NONO	0	0	0.282359	-0.89894
sp|P48029|SC6A8_HUMAN	SC6A8_HUMAN	SLC6A8	0	0	0.281795	0.677059
sp|P62244|RS15A_HUMAN	RS15A_HUMAN	RPS15A	2.0729	1.43976	0.281705	0.930246
sp|O75691|UTP20_HUMAN	UTP20_HUMAN	UTP20	7.97115	2.82332	0.281363	0.941833
sp|O00151|PDLI1_HUMAN	PDLI1_HUMAN	PDLIM1	3.86799	1.96672	0.280486	0.777979
sp|Q9Y5M8|SRPRB_HUMAN	SRPRB_HUMAN	SRPRB	0	0	0.279904	-1.06578
sp|Q9UQN3|CHM2B_HUMAN	CHM2B_HUMAN	CHMP2B	3.24572	1.80159	0.27823	0.811769
sp|Q9BU76|MMTA2_HUMAN	MMTA2_HUMAN	MMTAG2	3.5851	1.89344	0.277231	0.357522
sp|Q96C19|EFHD2_HUMAN	EFHD2_HUMAN	EFHD2	3.04382	1.74465	0.275814	0.771972
sp|Q96SU4|OSBL9_HUMAN	OSBL9_HUMAN	OSBPL9	0	0	0.275747	-0.402953
sp|Q53H12|AGK_HUMAN	AGK_HUMAN	AGK	0	0	0.273427	-0.919348
sp|Q92598|HS105_HUMAN	HS105_HUMAN	HSPH1	4.86329	2.20529	0.273356	1.08286
sp|P27824|CALX_HUMAN	CALX_HUMAN	CANX	6.81383	2.61033	0.272808	0.915968
sp|Q16822|PCKGM_HUMAN	PCKGM_HUMAN	PCK2	0	0	0.272217	0.420458
sp|O95613|PCNT_HUMAN	PCNT_HUMAN	PCNT	3.76336	1.93994	0.271629	-1.0987
sp|Q9UNX4|WDR3_HUMAN	WDR3_HUMAN	WDR3	1.49741	1.22369	0.270236	-0.645338
sp|Q9NWT8|AKIP_HUMAN	AKIP_HUMAN	AURKAIP1	0	0	0.269633	0.999064
sp|Q14C86|GAPD1_HUMAN	GAPD1_HUMAN	GAPVD1	12.2853	3.50503	0.268478	1.2446
sp|Q9Y666|S12A7_HUMAN	S12A7_HUMAN	SLC12A7	0	0	0.265462	0.720758
sp|Q9NZ52|GGA3_HUMAN	GGA3_HUMAN	GGA3	1.21064	1.10029	0.265321	-0.663874
sp|Q8N6T3|ARFG1_HUMAN	ARFG1_HUMAN	ARFGAP1	2.79157	1.6708	0.265086	0.768412
sp|O15294|OGT1_HUMAN	OGT1_HUMAN	OGT	1.37078	1.1708	0.26424	0.666033
sp|O43592|XPOT_HUMAN	XPOT_HUMAN	XPOT	0.984217	0.992077	0.264006	0.620779
sp|P12236|ADT3_HUMAN	ADT3_HUMAN	SLC25A6	8.39913	2.89813	0.263567	0.689949
sp|O60566|BUB1B_HUMAN	BUB1B_HUMAN	BUB1B	6.84513	2.61632	0.262977	0.912278
sp|P27708|PYR1_HUMAN	PYR1_HUMAN	CAD	6.41285	2.53236	0.262547	0.770178
sp|P22314|UBA1_HUMAN	UBA1_HUMAN	UBA1	1.55286	1.24614	0.26228	0.509031
sp|Q14008|CKAP5_HUMAN	CKAP5_HUMAN	CKAP5	6.13427	2.47675	0.260042	1.19509
sp|Q04721|NOTC2_HUMAN	NOTC2_HUMAN	NOTCH2	1.0325	1.01612	0.259783	-0.769956
sp|P42766|RL35_HUMAN	RL35_HUMAN	RPL35	5.03673	2.24427	0.259422	0.309317
sp|Q9Y2K1|ZBTB1_HUMAN	ZBTB1_HUMAN	ZBTB1	0	0	0.259413	-0.334464
sp|Q9Y266|NUDC_HUMAN	NUDC_HUMAN	NUDC	3.13009	1.7692	0.259156	-0.504271
sp|O94842|TOX4_HUMAN	TOX4_HUMAN	TOX4	1.15866	1.07641	0.258469	-1.00431
sp|P05388|RLA0_HUMAN;sp|Q8NHW5|RLA0L_HUMAN	RLA0_HUMAN	RPLP0	4.12611	2.03128	0.258308	0.452177
sp|Q4KWH8|PLCH1_HUMAN	PLCH1_HUMAN	PLCH1	0	0	0.257323	0.45295
sp|Q9NVU7|SDA1_HUMAN	SDA1_HUMAN	SDAD1	3.11155	1.76396	0.256825	1.11374
sp|Q14157|UBP2L_HUMAN	UBP2L_HUMAN	UBAP2L	3.41997	1.84931	0.256504	0.87355
sp|O15440|MRP5_HUMAN	MRP5_HUMAN	ABCC5	0	0	0.255552	-0.620009
sp|Q9H6U6|BCAS3_HUMAN	BCAS3_HUMAN	BCAS3	0	0	0.255141	0.463454
sp|P10809|CH60_HUMAN	CH60_HUMAN	HSPD1	1.66126	1.2889	0.254111	-0.772846
sp|O75381|PEX14_HUMAN	PEX14_HUMAN	PEX14	1.41179	1.18819	0.253778	-0.834208
sp|Q9H3P7|GCP60_HUMAN	GCP60_HUMAN	ACBD3	3.54609	1.88311	0.252999	0.872022
sp|Q92522|H1X_HUMAN	H1X_HUMAN	H1FX	3.81355	1.95283	0.252949	0.919267
sp|Q9Y6M7|S4A7_HUMAN	S4A7_HUMAN	SLC4A7	4.72195	2.173	0.251362	0.94309
sp|Q9NYV4|CDK12_HUMAN	CDK12_HUMAN	CDK12	0	0	0.250432	0.600528
sp|P62701|RS4X_HUMAN	RS4X_HUMAN	RPS4X	3.7713	1.94198	0.250251	-0.413013
sp|Q6UB99|ANR11_HUMAN	ANR11_HUMAN	ANKRD11	8.50906	2.91703	0.249226	1.0833
sp|P05141|ADT2_HUMAN	ADT2_HUMAN	SLC25A5	4.64238	2.15462	0.248992	0.314285
sp|Q15643|TRIPB_HUMAN	TRIPB_HUMAN	TRIP11	6.42556	2.53487	0.247054	1.05416
sp|P13639|EF2_HUMAN	EF2_HUMAN	EEF2	3.83305	1.95782	0.246642	0.469509
sp|P62269|RS18_HUMAN	RS18_HUMAN	RPS18	3.44374	1.85573	0.244564	0.606803
sp|P49790|NU153_HUMAN	NU153_HUMAN	NUP153	4.89068	2.21149	0.24443	1.10387
sp|Q6MZP7|LIN54_HUMAN	LIN54_HUMAN	LIN54	1.76947	1.33021	0.244075	-0.530413
sp|Q96RQ3|MCCA_HUMAN	MCCA_HUMAN	MCCC1	7.64062	2.76417	0.243134	0.815684
sp|Q7KZF4|SND1_HUMAN	SND1_HUMAN	SND1	4.3358	2.08226	0.242861	0.852129
sp|P29966|MARCS_HUMAN	MARCS_HUMAN	MARCKS	1.04367	1.0216	0.242255	-0.640994
sp|P30876|RPB2_HUMAN	RPB2_HUMAN	POLR2B	3.45678	1.85924	0.239897	-0.809693
sp|Q8WUX9|CHMP7_HUMAN	CHMP7_HUMAN	CHMP7	0	0	0.239144	-0.583854
sp|O60271|JIP4_HUMAN	JIP4_HUMAN	SPAG9	4.78068	2.18648	0.238678	0.769212
sp|P68371|TBB4B_HUMAN	TBB4B_HUMAN	TUBB4B	6.21412	2.49281	0.238068	0.404811
sp|P43307|SSRA_HUMAN	SSRA_HUMAN	SSR1	1.47754	1.21554	0.23794	0.906432
sp|Q14980|NUMA1_HUMAN	NUMA1_HUMAN	NUMA1	2.26026	1.50342	0.236463	-0.976626
sp|Q8IV50|LYSM2_HUMAN	LYSM2_HUMAN	#N/A	#N/A	#N/A	0.235097	0.481096
sp|Q99615|DNJC7_HUMAN	DNJC7_HUMAN	DNAJC7	0.912772	0.955391	0.234576	-0.807926
sp|Q562F6|SGO2_HUMAN	SGO2_HUMAN	SGO2	15.4317	3.92832	0.234236	0.938861
sp|Q9UPQ9|TNR6B_HUMAN	TNR6B_HUMAN	TNRC6B	7.03808	2.65294	0.233755	0.450704
sp|Q13523|PRP4B_HUMAN	PRP4B_HUMAN	PRPF4B	1.54611	1.24342	0.233253	0.721933
sp|Q8IZH2|XRN1_HUMAN	XRN1_HUMAN	XRN1	5.99201	2.44786	0.232739	1.08174
sp|Q9NPI6|DCP1A_HUMAN	DCP1A_HUMAN	DCP1A	3.66795	1.91519	0.231936	0.381974
sp|O15173|PGRC2_HUMAN	PGRC2_HUMAN	PGRMC2	3.53846	1.88108	0.231695	-0.339292
sp|Q9NRA8|4ET_HUMAN	4ET_HUMAN	EIF4ENIF1	4.29903	2.07341	0.230857	0.818626
sp|Q13371|PHLP_HUMAN	PHLP_HUMAN	PDCL	4.12501	2.03101	0.229387	0.811383
sp|O75663|TIPRL_HUMAN	TIPRL_HUMAN	TIPRL	2.38658	1.54486	0.229147	0.670581
sp|Q00341|VIGLN_HUMAN	VIGLN_HUMAN	HDLBP	6.31915	2.51379	0.228988	0.962327
sp|P46776|RL27A_HUMAN	RL27A_HUMAN	RPL27A	3.30738	1.81862	0.228757	0.307773
sp|Q8NDI1|EHBP1_HUMAN	EHBP1_HUMAN	EHBP1	6.02417	2.45442	0.226774	0.523997
sp|P46939|UTRO_HUMAN	UTRO_HUMAN	UTRN	6.92206	2.63098	0.226407	1.18154
sp|P62910|RL32_HUMAN	RL32_HUMAN	RPL32	3.15816	1.77712	0.224243	0.535928
sp|O75152|ZC11A_HUMAN	ZC11A_HUMAN	ZC3H11A	1.71668	1.31022	0.222376	-0.703295
sp|O95819|M4K4_HUMAN	M4K4_HUMAN	MAP4K4	1.10479	1.05109	0.221907	0.735261
sp|Q9UNX3|RL26L_HUMAN	RL26L_HUMAN	RPL26L1	9.04091	3.00681	0.221748	0.779196
sp|Q9BVC6|TM109_HUMAN	TM109_HUMAN	TMEM109	0	0	0.221735	0.462414
sp|Q9Y2W6|TDRKH_HUMAN	TDRKH_HUMAN	TDRKH	4.78995	2.1886	0.22135	0.340104
sp|Q92878|RAD50_HUMAN	RAD50_HUMAN	RAD50	2.51948	1.58729	0.220401	-0.749822
sp|P55010|IF5_HUMAN	IF5_HUMAN	EIF5	2.47027	1.57171	0.220253	-0.733652
sp|Q9NPL8|TIDC1_HUMAN	TIDC1_HUMAN	TIMMDC1	0	0	0.219348	-0.393305
sp|Q6PCB5|RSBNL_HUMAN	RSBNL_HUMAN	RSBN1L	1.89504	1.37661	0.219061	0.590049
sp|P35658|NU214_HUMAN	NU214_HUMAN	NUP214	17.9545	4.23728	0.217698	0.611829
sp|Q93045|STMN2_HUMAN	STMN2_HUMAN	STMN2	0	0	0.215886	0.560409
sp|Q9UBP9|GULP1_HUMAN	GULP1_HUMAN	GULP1	0	0	0.21476	0.599533
sp|Q9Y3C1|NOP16_HUMAN	NOP16_HUMAN	NOP16	5.96985	2.44333	0.214077	0.634753
sp|Q5SQN1|SNP47_HUMAN	SNP47_HUMAN	SNAP47	7.61367	2.75929	0.212928	-0.563456
sp|Q02878|RL6_HUMAN	RL6_HUMAN	RPL6	1.38911	1.1786	0.212544	-0.690075
sp|Q01968|OCRL_HUMAN	OCRL_HUMAN	OCRL	2.43831	1.56151	0.212374	-0.742732
sp|Q96RL7|VP13A_HUMAN	VP13A_HUMAN	VPS13A	4.47506	2.11543	0.212253	-0.905205
sp|P81605|DCD_HUMAN	DCD_HUMAN	DCD	10.8424	3.29278	0.211743	0.587662
sp|Q86UL3|GPAT4_HUMAN	GPAT4_HUMAN	GPAT4	0	0	0.209695	0.604876
sp|Q15836|VAMP3_HUMAN	VAMP3_HUMAN	VAMP3	0.85308	0.923623	0.208517	0.595156
sp|P41252|SYIC_HUMAN	SYIC_HUMAN	IARS	0	0	0.208441	-0.397822
sp|P42704|LPPRC_HUMAN	LPPRC_HUMAN	LRPPRC	0.990977	0.995478	0.201259	-0.949127
sp|Q14139|UBE4A_HUMAN	UBE4A_HUMAN	UBE4A	0	0	0.201061	-0.580327
sp|Q5T8P6|RBM26_HUMAN	RBM26_HUMAN	RBM26	1.15151	1.07308	0.20091	0.573244
sp|Q2TBE0|C19L2_HUMAN	C19L2_HUMAN	CWF19L2	0	0	0.19996	0.324783
sp|P23284|PPIB_HUMAN	PPIB_HUMAN	PPIB	0	0	0.199309	0.462456
sp|Q06830|PRDX1_HUMAN	PRDX1_HUMAN	PRDX1	2.83057	1.68243	0.197863	0.304192
sp|Q13144|EI2BE_HUMAN	EI2BE_HUMAN	EIF2B5	0	0	0.197853	0.267971
sp|O14647|CHD2_HUMAN	CHD2_HUMAN	CHD2	0	0	0.197478	-0.330642
sp|Q9BQ52|RNZ2_HUMAN	RNZ2_HUMAN	ELAC2	0	0	0.196747	0.486723
sp|P56192|SYMC_HUMAN	SYMC_HUMAN	MARS	1.1102	1.05366	0.195614	-0.474842
sp|Q9UPQ3|AGAP1_HUMAN	AGAP1_HUMAN	AGAP1	5.73932	2.39569	0.195384	0.58165
sp|Q9BSJ8|ESYT1_HUMAN	ESYT1_HUMAN	ESYT1	5.04054	2.24512	0.194546	0.759412
sp|O00541|PESC_HUMAN	PESC_HUMAN	PES1	5.88523	2.42595	0.193522	0.545455
sp|Q86UP2|KTN1_HUMAN	KTN1_HUMAN	KTN1	6.02344	2.45427	0.19187	-0.406358
sp|Q9HD67|MYO10_HUMAN	MYO10_HUMAN	MYO10	7.21347	2.68579	0.191849	0.571411
sp|Q05655|KPCD_HUMAN	KPCD_HUMAN	PRKCD	1.52624	1.23541	0.19126	-0.422165
sp|Q53GQ0|DHB12_HUMAN	DHB12_HUMAN	HSD17B12	0	0	0.190999	0.296099
sp|P11142|HSP7C_HUMAN	HSP7C_HUMAN	HSPA8	4.87946	2.20895	0.190725	-0.554694
sp|P46821|MAP1B_HUMAN	MAP1B_HUMAN	MAP1B	4.82281	2.19609	0.190004	0.873261
sp|Q9UGP8|SEC63_HUMAN	SEC63_HUMAN	SEC63	0.916326	0.957249	0.189044	-0.673915
sp|O94813|SLIT2_HUMAN	SLIT2_HUMAN	SLIT2	10.7596	3.28018	0.18795	0.690048
sp|Q9P227|RHG23_HUMAN	RHG23_HUMAN	ARHGAP23	0	0	0.185934	0.267933
sp|P05556|ITB1_HUMAN	ITB1_HUMAN	ITGB1	3.74355	1.93482	0.183197	0.748307
sp|P08240|SRPRA_HUMAN	SRPRA_HUMAN	SRPRA	3.77322	1.94248	0.183076	0.690794
sp|Q14498|RBM39_HUMAN	RBM39_HUMAN	RBM39	2.65236	1.62861	0.181731	0.372392
sp|Q13263|TIF1B_HUMAN	TIF1B_HUMAN	TRIM28	2.15307	1.46734	0.181456	-0.431533
sp|Q9NVH0|EXD2_HUMAN	EXD2_HUMAN	EXD2	5.34392	2.31169	0.180844	0.272539
sp|P50914|RL14_HUMAN	RL14_HUMAN	RPL14	0	0	0.179581	-0.258003
sp|Q04637|IF4G1_HUMAN	IF4G1_HUMAN	EIF4G1	7.0493	2.65505	0.179404	0.758032
sp|P36776|LONM_HUMAN	LONM_HUMAN	LONP1	2.323	1.52414	0.177986	0.484956
sp|P05023|AT1A1_HUMAN	AT1A1_HUMAN	ATP1A1	4.93841	2.22225	0.177139	0.568291
sp|O15067|PUR4_HUMAN	PUR4_HUMAN	PFAS	0	0	0.176457	0.437151
sp|Q8IUD2|RB6I2_HUMAN	RB6I2_HUMAN	ERC1	4.90205	2.21406	0.176405	0.768045
sp|Q96AG4|LRC59_HUMAN	LRC59_HUMAN	LRRC59	2.53363	1.59174	0.175263	-0.407557
sp|Q14160|SCRIB_HUMAN	SCRIB_HUMAN	SCRIB	1.32588	1.15147	0.174799	-0.64929
sp|Q9UNF1|MAGD2_HUMAN	MAGD2_HUMAN	MAGED2	1.41665	1.19023	0.173895	-0.525576
sp|P15880|RS2_HUMAN	RS2_HUMAN	RPS2	2.93851	1.71421	0.171295	-0.385621
sp|O75369|FLNB_HUMAN	FLNB_HUMAN	FLNB	7.38404	2.71736	0.17084	0.609151
sp|P00558|PGK1_HUMAN	PGK1_HUMAN	PGK1	0	0	0.17023	-0.198176
sp|Q9HBM0|VEZA_HUMAN	VEZA_HUMAN	VEZT	5.54886	2.3556	0.169347	0.566904
sp|P42167|LAP2B_HUMAN	LAP2B_HUMAN	TMPO	4.44831	2.1091	0.169332	0.318589
sp|O95478|NSA2_HUMAN	NSA2_HUMAN	NSA2	2.46163	1.56896	0.169247	-0.356462
sp|P07900|HS90A_HUMAN	HS90A_HUMAN	HSP90AA1	4.37083	2.09065	0.169196	0.685297
sp|P33176|KINH_HUMAN	KINH_HUMAN	KIF5B	0	0	0.169155	-0.58428
sp|O75376|NCOR1_HUMAN	NCOR1_HUMAN	NCOR1	2.50593	1.58301	0.167558	0.497499
sp|P07437|TBB5_HUMAN	TBB5_HUMAN	TUBB	6.07199	2.46414	0.166099	0.294522
sp|Q13586|STIM1_HUMAN	STIM1_HUMAN	STIM1	3.26773	1.80769	0.165168	0.659209
sp|Q9BR76|COR1B_HUMAN	COR1B_HUMAN	CORO1B	3.40759	1.84597	0.163861	0.462057
sp|O14776|TCRG1_HUMAN	TCRG1_HUMAN	TCERG1	0	0	0.163597	0.430296
sp|Q9C0D5|TANC1_HUMAN	TANC1_HUMAN	TANC1	4.4787	2.11629	0.163214	0.471994
sp|P00338|LDHA_HUMAN	LDHA_HUMAN	LDHA	7.60595	2.75789	0.163162	0.561562
sp|Q8IZT6|ASPM_HUMAN	ASPM_HUMAN	ASPM	3.41819	1.84883	0.161658	0.446715
sp|Q99707|METH_HUMAN	METH_HUMAN	MTR	1.19243	1.09199	0.160248	-0.737371
sp|Q9UKF6|CPSF3_HUMAN	CPSF3_HUMAN	CPSF3	5.68658	2.38466	0.159877	0.542439
sp|P45880|VDAC2_HUMAN	VDAC2_HUMAN	VDAC2	1.19269	1.0921	0.159709	-0.617586
sp|Q9NU22|MDN1_HUMAN	MDN1_HUMAN	MDN1	11.8862	3.44764	0.159276	0.674452
sp|Q5TAX3|TUT4_HUMAN	TUT4_HUMAN	TUT4	0	0	0.158642	0.444373
sp|O60488|ACSL4_HUMAN	ACSL4_HUMAN	ACSL4	2.20615	1.48531	0.158326	0.375769
sp|O75643|U520_HUMAN	U520_HUMAN	SNRNP200	0.914183	0.956129	0.158234	-0.470002
sp|P00167|CYB5_HUMAN	CYB5_HUMAN	CYB5A	0	0	0.158146	0.303739
sp|P62750|RL23A_HUMAN	RL23A_HUMAN	RPL23A	4.50062	2.12147	0.158108	0.200976
sp|Q5TC12|ATPF1_HUMAN	ATPF1_HUMAN	ATPAF1	3.43175	1.8525	0.158019	0.466263
sp|Q9UPW5|CBPC1_HUMAN	CBPC1_HUMAN	AGTPBP1	4.48681	2.11821	0.158011	0.467264
sp|P62263|RS14_HUMAN	RS14_HUMAN	RPS14	2.68917	1.63987	0.157236	-0.432638
sp|Q9P031|TAP26_HUMAN	TAP26_HUMAN	CCDC59	1.09394	1.04592	0.156196	0.665928
sp|Q9UIQ6|LCAP_HUMAN	LCAP_HUMAN	LNPEP	1.68534	1.29821	0.156072	0.418605
sp|P23528|COF1_HUMAN	COF1_HUMAN	CFL1	1.46876	1.21192	0.154411	0.449178
sp|P21333|FLNA_HUMAN	FLNA_HUMAN	FLNA	16.704	4.08705	0.153251	0.454476
sp|Q9Y2I1|NISCH_HUMAN	NISCH_HUMAN	NISCH	1.25307	1.11941	0.153249	-0.539349
sp|Q07157|ZO1_HUMAN	ZO1_HUMAN	TJP1	0	0	0.152196	-0.31961
sp|P30101|PDIA3_HUMAN	PDIA3_HUMAN	PDIA3	3.04136	1.74395	0.151712	0.177433
sp|Q8IZ21|PHAR4_HUMAN	PHAR4_HUMAN	PHACTR4	0	0	0.151444	0.39714
sp|P35579|MYH9_HUMAN	MYH9_HUMAN	MYH9	6.37114	2.52411	0.151142	0.581469
sp|P11532|DMD_HUMAN	DMD_HUMAN	DMD	0	0	0.151066	0.494156
sp|Q70E73|RAPH1_HUMAN	RAPH1_HUMAN	RAPH1	3.79114	1.94708	0.150984	-0.499566
sp|P37802|TAGL2_HUMAN	TAGL2_HUMAN	TAGLN2	3.90311	1.97563	0.150475	0.3178
sp|O15056|SYNJ2_HUMAN	SYNJ2_HUMAN	SYNJ2	2.84034	1.68533	0.150278	0.378176
sp|Q15758|AAAT_HUMAN	AAAT_HUMAN	SLC1A5	3.97236	1.99308	0.150022	0.349341
sp|Q8N2A8|PLD6_HUMAN	PLD6_HUMAN	PLD6	5.86274	2.42131	0.149954	-0.384489
sp|P49368|TCPG_HUMAN	TCPG_HUMAN	CCT3	1.54905	1.24461	0.149445	-0.435918
sp|Q9Y6K0|CEPT1_HUMAN	CEPT1_HUMAN	CEPT1	0	0	0.14855	0.346744
sp|P35611|ADDA_HUMAN	ADDA_HUMAN	ADD1	0	0	0.148496	-0.500431
sp|P15311|EZRI_HUMAN	EZRI_HUMAN	EZR	2.42751	1.55805	0.148449	-0.407249
sp|Q9BZF1|OSBL8_HUMAN	OSBL8_HUMAN	OSBPL8	0	0	0.148442	0.34256
sp|P23588|IF4B_HUMAN	IF4B_HUMAN	EIF4B	2.65541	1.62954	0.147582	-0.485318
sp|P14209|CD99_HUMAN	CD99_HUMAN	CD99	0	0	0.146775	0.278823
sp|Q86V48|LUZP1_HUMAN	LUZP1_HUMAN	LUZP1	39.5864	6.29177	0.145262	0.233229
sp|Q8TC07|TBC15_HUMAN	TBC15_HUMAN	TBC1D15	3.96938	1.99233	0.144569	-0.554524
sp|P35268|RL22_HUMAN	RL22_HUMAN	RPL22	0	0	0.144305	-0.481855
sp|Q9Y3U8|RL36_HUMAN	RL36_HUMAN	RPL36	3.18508	1.78468	0.144088	0.34767
sp|Q9NRY5|F1142_HUMAN	F1142_HUMAN	FAM114A2	1.49616	1.22317	0.14401	0.496388
sp|P16435|NCPR_HUMAN	NCPR_HUMAN	POR	0	0	0.142519	0.447662
sp|O14737|PDCD5_HUMAN	PDCD5_HUMAN	PDCD5	0	0	0.141503	0.254699
sp|P49006|MRP_HUMAN	MRP_HUMAN	MARCKSL1	0	0	0.141422	0.300551
sp|P61026|RAB10_HUMAN	RAB10_HUMAN	RAB10	17.9804	4.24033	0.141353	0.652311
sp|Q58FF8|H90B2_HUMAN	H90B2_HUMAN	#N/A	#N/A	#N/A	0.141194	-0.459949
sp|Q9Y5X1|SNX9_HUMAN	SNX9_HUMAN	SNX9	1.16598	1.0798	0.141059	0.490674
sp|Q96MW1|CCD43_HUMAN	CCD43_HUMAN	CCDC43	2.51202	1.58493	0.14099	-0.484516
sp|P11940|PABP1_HUMAN	PABP1_HUMAN	PABPC1	0	0	0.140558	-0.346635
sp|Q8NBN3|TM87A_HUMAN	TM87A_HUMAN	TMEM87A	2.98024	1.72634	0.138493	-0.555513
sp|P38646|GRP75_HUMAN	GRP75_HUMAN	HSPA9	8.24394	2.87123	0.135877	0.528381
sp|Q8WWM7|ATX2L_HUMAN	ATX2L_HUMAN	ATXN2L	3.57339	1.89034	0.135017	-0.47138
sp|Q00839|HNRPU_HUMAN	HNRPU_HUMAN	HNRNPU	4.05667	2.01412	0.134182	0.451716
sp|Q9H8Y8|GORS2_HUMAN	GORS2_HUMAN	GORASP2	1.70711	1.30656	0.132765	-0.458707
sp|Q9H0A0|NAT10_HUMAN	NAT10_HUMAN	NAT10	4.17711	2.0438	0.131824	0.506167
sp|P11171|41_HUMAN	41_HUMAN	EPB41	5.50823	2.34696	0.130693	0.558931
sp|Q12955|ANK3_HUMAN	ANK3_HUMAN	ANK3	0	0	0.130443	-0.306113
sp|Q9HCK8|CHD8_HUMAN	CHD8_HUMAN	CHD8	7.2248	2.6879	0.129261	0.705696
sp|O43491|E41L2_HUMAN	E41L2_HUMAN	EPB41L2	5.14843	2.26901	0.128995	0.411014
sp|P52701|MSH6_HUMAN	MSH6_HUMAN	MSH6	1.33352	1.15478	0.128834	-0.481671
sp|Q9NVP1|DDX18_HUMAN	DDX18_HUMAN	DDX18	4.54343	2.13153	0.128288	0.553896
sp|P26373|RL13_HUMAN	RL13_HUMAN	RPL13	3.00856	1.73452	0.128087	0.199658
sp|Q14974|IMB1_HUMAN	IMB1_HUMAN	KPNB1	0	0	0.127089	-0.432903
sp|P51587|BRCA2_HUMAN	BRCA2_HUMAN	BRCA2	0	0	0.126427	0.338999
sp|Q3YEC7|RABL6_HUMAN	RABL6_HUMAN	RABL6	2.892	1.70059	0.125841	0.442911
sp|Q5VV42|CDKAL_HUMAN	CDKAL_HUMAN	CDKAL1	0.910298	0.954095	0.125363	0.406611
sp|Q9C0C4|SEM4C_HUMAN	SEM4C_HUMAN	SEMA4C	0.974053	0.986941	0.123882	-0.386715
sp|P39023|RL3_HUMAN	RL3_HUMAN	RPL3	1.6504	1.28468	0.122798	-0.404914
sp|Q8WYP5|ELYS_HUMAN	ELYS_HUMAN	AHCTF1	0	0	0.12265	-0.234654
sp|O95721|SNP29_HUMAN	SNP29_HUMAN	SNAP29	4.11487	2.02851	0.121931	0.372647
sp|Q99878|H2A1J_HUMAN;sp|Q96KK5|H2A1H_HUMAN;sp|Q9BTM1|H2AJ_HUMAN;sp|Q16777|H2A2C_HUMAN;sp|Q93077|H2A1C_HUMAN;sp|Q7L7L0|H2A3_HUMAN;sp|Q6FI13|H2A2A_HUMAN;sp|P20671|H2A1D_HUMAN;sp|P0C0S8|H2A1_HUMAN;sp|P04908|H2A1B_HUMAN;sp|Q71UI9|H2AV_HUMAN;sp|P0C0S5|H2AZ_HUMAN;sp|Q96QV6|H2A1A_HUMAN;sp|P16104|H2AX_HUMAN	H2A1J_HUMAN	HIST1H2AJ	0	0	0.121624	0.336299
sp|P62913|RL11_HUMAN	RL11_HUMAN	RPL11	2.68759	1.63939	0.12138	-0.267405
sp|Q02790|FKBP4_HUMAN	FKBP4_HUMAN	FKBP4	1.46613	1.21084	0.120795	-0.393519
sp|Q5JSH3|WDR44_HUMAN	WDR44_HUMAN	WDR44	5.02297	2.2412	0.119523	0.430463
sp|Q16513|PKN2_HUMAN	PKN2_HUMAN	PKN2	6.15401	2.48073	0.119406	0.41967
sp|P62304|RUXE_HUMAN	RUXE_HUMAN	SNRPE	0	0	0.11901	-0.281848
sp|Q6P995|F171B_HUMAN	F171B_HUMAN	FAM171B	0	0	0.118897	0.320147
sp|Q13439|GOGA4_HUMAN	GOGA4_HUMAN	GOLGA4	7.34687	2.71051	0.118573	0.654372
sp|O94822|LTN1_HUMAN	LTN1_HUMAN	LTN1	0.927956	0.963305	0.11849	-0.366303
sp|Q9H501|ESF1_HUMAN	ESF1_HUMAN	ESF1	0	0	0.116611	-0.312389
sp|Q8NG31|KNL1_HUMAN	KNL1_HUMAN	KNL1	21.5337	4.64044	0.115576	0.517297
sp|Q7Z6K5|ARPIN_HUMAN	ARPIN_HUMAN	ARPIN	1.6733	1.29356	0.115435	-0.417523
sp|P18621|RL17_HUMAN	RL17_HUMAN	RPL17	3.80856	1.95155	0.114866	-0.121729
sp|P55196|AFAD_HUMAN	AFAD_HUMAN	AFDN	11.4002	3.37642	0.114759	0.461691
sp|Q9HAV4|XPO5_HUMAN	XPO5_HUMAN	XPO5	0	0	0.114686	-0.14833
sp|Q13620|CUL4B_HUMAN;sp|Q13619|CUL4A_HUMAN	CUL4B_HUMAN	CUL4B	0	0	0.114302	-0.161989
sp|P12004|PCNA_HUMAN	PCNA_HUMAN	PCNA	1.89756	1.37752	0.113224	0.260111
sp|Q99733|NP1L4_HUMAN	NP1L4_HUMAN	NAP1L4	0	0	0.113146	0.334863
sp|P62753|RS6_HUMAN	RS6_HUMAN	RPS6	5.36846	2.31699	0.113058	0.144984
sp|Q96EB1|ELP4_HUMAN	ELP4_HUMAN	ELP4	0	0	0.110976	-0.239955
sp|P23458|JAK1_HUMAN	JAK1_HUMAN	JAK1	3.72689	1.93052	0.108145	0.360452
sp|Q5VTE0|EF1A3_HUMAN;sp|P68104|EF1A1_HUMAN	EF1A3_HUMAN	EEF1A1P5	0	0	0.108099	-0.134719
sp|Q92540|SMG7_HUMAN	SMG7_HUMAN	SMG7	3.13226	1.76982	0.107973	0.371215
sp|Q9H2H9|S38A1_HUMAN	S38A1_HUMAN	SLC38A1	1.9799	1.40709	0.107005	0.498927
sp|Q9H3U1|UN45A_HUMAN	UN45A_HUMAN	UNC45A	3.70339	1.92442	0.106882	-0.464027
sp|P49321|NASP_HUMAN	NASP_HUMAN	NASP	1.63807	1.27987	0.104733	0.38593
sp|P08238|HS90B_HUMAN	HS90B_HUMAN	HSP90AB1	5.33061	2.30881	0.104339	-0.199716
sp|Q9Y6Y8|S23IP_HUMAN	S23IP_HUMAN	SEC23IP	0	0	0.104029	0.308191
sp|O60749|SNX2_HUMAN	SNX2_HUMAN	SNX2	2.56079	1.60025	0.103654	-0.234252
sp|Q96S99|PKHF1_HUMAN	PKHF1_HUMAN	PLEKHF1	0	0	0.103274	-0.240879
sp|O60716|CTND1_HUMAN	CTND1_HUMAN	CTNND1	1.298	1.1393	0.102591	0.415448
sp|Q9H089|LSG1_HUMAN	LSG1_HUMAN	LSG1	1.43628	1.19845	0.102054	-0.235309
sp|Q13190|STX5_HUMAN	STX5_HUMAN	STX5	1.97183	1.40422	0.100994	0.414169
sp|Q9Y490|TLN1_HUMAN	TLN1_HUMAN	TLN1	6.96607	2.63933	0.100292	0.390104
sp|Q14126|DSG2_HUMAN	DSG2_HUMAN	DSG2	0.960147	0.979871	0.100222	-0.334254
sp|Q02952|AKA12_HUMAN	AKA12_HUMAN	AKAP12	3.92326	1.98072	0.0986213	0.434543
sp|Q15005|SPCS2_HUMAN	SPCS2_HUMAN	SPCS2	0	0	0.0981706	-0.223733
sp|Q92997|DVL3_HUMAN	DVL3_HUMAN	DVL3	5.01123	2.23858	0.097411	0.370408
sp|Q15942|ZYX_HUMAN	ZYX_HUMAN	ZYX	1.62924	1.27642	0.0966734	-0.256047
sp|Q9BQG0|MBB1A_HUMAN	MBB1A_HUMAN	MYBBP1A	8.3832	2.89538	0.0956821	0.155442
sp|Q9UHQ9|NB5R1_HUMAN	NB5R1_HUMAN	CYB5R1	1.5544	1.24676	0.0935749	0.3385
sp|Q6Y7W6|GGYF2_HUMAN	GGYF2_HUMAN	GIGYF2	5.7797	2.4041	0.0935193	0.339793
sp|P62277|RS13_HUMAN	RS13_HUMAN	RPS13	2.01519	1.41957	0.0926844	-0.342997
sp|Q8TD26|CHD6_HUMAN	CHD6_HUMAN	CHD6	3.21664	1.7935	0.0924931	0.15944
sp|Q15311|RBP1_HUMAN	RBP1_HUMAN	RALBP1	1.34402	1.15932	0.0914489	0.362347
sp|Q9NP61|ARFG3_HUMAN	ARFG3_HUMAN	ARFGAP3	1.36655	1.169	0.0906756	0.238569
sp|E9PAV3|NACAM_HUMAN;sp|Q13765|NACA_HUMAN	NACAM_HUMAN	NACA	0	0	0.0899029	-0.344808
sp|Q9Y2J2|E41L3_HUMAN	E41L3_HUMAN	EPB41L3	4.18024	2.04456	0.0893358	-0.298347
sp|P05165|PCCA_HUMAN	PCCA_HUMAN	PCCA	12.6327	3.55426	0.0888849	0.479033
sp|P22392|NDKB_HUMAN;sp|O60361|NDK8_HUMAN	NDKB_HUMAN	NME2	0	0	0.0888753	0.332356
sp|Q9NZJ5|E2AK3_HUMAN	E2AK3_HUMAN	EIF2AK3	0	0	0.0879763	0.224359
sp|Q9Y6R0|NUMBL_HUMAN	NUMBL_HUMAN	NUMBL	0	0	0.0877527	0.265283
sp|Q15398|DLGP5_HUMAN	DLGP5_HUMAN	DLGAP5	1.20846	1.0993	0.0874593	-0.228979
sp|Q9NZ01|TECR_HUMAN	TECR_HUMAN	TECR	3.21247	1.79234	0.0871587	-0.371817
sp|P63261|ACTG_HUMAN;sp|P60709|ACTB_HUMAN	ACTG_HUMAN	ACTG1	0	0	0.0866094	0.204135
sp|P56182|RRP1_HUMAN	RRP1_HUMAN	RRP1	2.79433	1.67162	0.086321	0.290249
sp|P13804|ETFA_HUMAN	ETFA_HUMAN	ETFA	4.17687	2.04374	0.0862268	0.342248
sp|P11717|MPRI_HUMAN	MPRI_HUMAN	IGF2R	3.43163	1.85247	0.0854877	-0.368916
sp|P06576|ATPB_HUMAN	ATPB_HUMAN	ATP5F1B	3.23615	1.79893	0.0853819	-0.237867
sp|Q5SW79|CE170_HUMAN	CE170_HUMAN	CEP170	2.23039	1.49345	0.0849105	-0.413291
sp|Q5T3I0|GPTC4_HUMAN	GPTC4_HUMAN	GPATCH4	3.3926	1.8419	0.0841312	0.26155
sp|Q5VWQ0|RSBN1_HUMAN	RSBN1_HUMAN	RSBN1	0	0	0.0833838	0.188212
sp|P42677|RS27_HUMAN	RS27_HUMAN	RPS27	2.92044	1.70893	0.0831648	0.154681
sp|O00483|NDUA4_HUMAN	NDUA4_HUMAN	NDUFA4	1.07902	1.03876	0.0831209	0.256577
sp|O14531|DPYL4_HUMAN	DPYL4_HUMAN	DPYSL4	0	0	0.0823912	0.185453
sp|Q8IWB9|TEX2_HUMAN	TEX2_HUMAN	TEX2	10.8337	3.29146	0.0814192	0.213171
sp|Q15390|MTFR1_HUMAN	MTFR1_HUMAN	MTFR1	2.61624	1.61748	0.0813293	-0.295888
sp|P20339|RAB5A_HUMAN	RAB5A_HUMAN	RAB5A	0	0	0.0805108	-0.469593
sp|Q9C0C2|TB182_HUMAN	TB182_HUMAN	TNKS1BP1	2.21233	1.48739	0.080207	0.133364
sp|Q92841|DDX17_HUMAN	DDX17_HUMAN	DDX17	0	0	0.0778364	0.249264
sp|P50990|TCPQ_HUMAN	TCPQ_HUMAN	CCT8	8.22094	2.86722	0.07774	-0.159877
sp|Q8IVD9|NUDC3_HUMAN	NUDC3_HUMAN	NUDCD3	0	0	0.0772844	0.15304
sp|P62249|RS16_HUMAN	RS16_HUMAN	RPS16	3.92683	1.98162	0.0771476	-0.112354
sp|P62241|RS8_HUMAN	RS8_HUMAN	RPS8	3.4603	1.86019	0.0758718	0.100776
sp|Q9BVP2|GNL3_HUMAN	GNL3_HUMAN	GNL3	8.93781	2.98962	0.0755614	0.094466
sp|O60763|USO1_HUMAN	USO1_HUMAN	USO1	0	0	0.0755523	-0.163647
sp|P60842|IF4A1_HUMAN	IF4A1_HUMAN	EIF4A1	0	0	0.0754943	-0.258639
sp|P48651|PTSS1_HUMAN	PTSS1_HUMAN	PTDSS1	1.50122	1.22524	0.0753534	0.205336
sp|Q5VZ89|DEN4C_HUMAN	DEN4C_HUMAN	DENND4C	3.09341	1.75881	0.0746432	0.315423
sp|P25685|DNJB1_HUMAN	DNJB1_HUMAN	DNAJB1	0	0	0.0728958	-0.262795
sp|P17812|PYRG1_HUMAN	PYRG1_HUMAN	CTPS1	3.00266	1.73282	0.0728498	0.301654
sp|Q9BXS9|S26A6_HUMAN	S26A6_HUMAN	SLC26A6	1.44605	1.20252	0.0726968	-0.191101
sp|P48444|COPD_HUMAN	COPD_HUMAN	ARCN1	0	0	0.0724918	0.248045
sp|Q14839|CHD4_HUMAN	CHD4_HUMAN	CHD4	3.68261	1.91901	0.0722916	0.317434
sp|Q07020|RL18_HUMAN	RL18_HUMAN	RPL18	4.19218	2.04748	0.0716266	0.251941
sp|P53621|COPA_HUMAN	COPA_HUMAN	COPA	1.01592	1.00793	0.0709609	0.180113
sp|Q96S66|CLCC1_HUMAN	CLCC1_HUMAN	CLCC1	3.04254	1.74429	0.0706071	0.303239
sp|Q6P996|PDXD1_HUMAN	PDXD1_HUMAN	PDXDC1	0.825879	0.908779	0.0705089	-0.250369
sp|O95372|LYPA2_HUMAN	LYPA2_HUMAN	LYPLA2	1.48558	1.21884	0.0704475	-0.250357
sp|Q9HB71|CYBP_HUMAN	CYBP_HUMAN	CACYBP	3.41521	1.84803	0.0700878	0.250176
sp|P49327|FAS_HUMAN	FAS_HUMAN	FASN	12.9165	3.59396	0.069598	-0.137329
sp|O00471|EXOC5_HUMAN	EXOC5_HUMAN	EXOC5	0	0	0.0694384	0.116309
sp|Q3ZCM7|TBB8_HUMAN	TBB8_HUMAN	#N/A	#N/A	#N/A	0.0686404	0.245598
sp|Q5JTC6|AMER1_HUMAN	AMER1_HUMAN	AMER1	0	0	0.0682395	0.102995
sp|P27816|MAP4_HUMAN	MAP4_HUMAN	MAP4	3.77284	1.94238	0.0678769	0.304362
sp|P52757|CHIO_HUMAN	CHIO_HUMAN	#N/A	#N/A	#N/A	0.0675014	-0.280738
sp|Q15366|PCBP2_HUMAN	PCBP2_HUMAN	PCBP2	2.47456	1.57307	0.0673449	-0.148027
sp|P61978|HNRPK_HUMAN	HNRPK_HUMAN	HNRNPK	0.585779	0.765362	0.0671509	0.226137
sp|Q15388|TOM20_HUMAN	TOM20_HUMAN	TOMM20	0	0	0.0663215	-0.257485
sp|Q5T8D3|ACBD5_HUMAN	ACBD5_HUMAN	ACBD5	0.694926	0.833622	0.0662664	-0.244881
sp|P63010|AP2B1_HUMAN	AP2B1_HUMAN	AP2B1	0	0	0.0660473	-0.145318
sp|Q9NVN8|GNL3L_HUMAN	GNL3L_HUMAN	GNL3L	4.96155	2.22745	0.0658568	0.239488
sp|O95905|ECD_HUMAN	ECD_HUMAN	ECD	1.69803	1.30309	0.0656774	0.188405
sp|Q8WXH0|SYNE2_HUMAN	SYNE2_HUMAN	SYNE2	6.11366	2.47258	0.0655062	0.398494
sp|Q8IWC1|MA7D3_HUMAN	MA7D3_HUMAN	MAP7D3	3.38061	1.83864	0.0654104	0.241197
sp|P16615|AT2A2_HUMAN	AT2A2_HUMAN	ATP2A2	5.04674	2.24649	0.0642882	0.282137
sp|P68133|ACTS_HUMAN;sp|P68032|ACTC_HUMAN;sp|P63267|ACTH_HUMAN;sp|P62736|ACTA_HUMAN	ACTS_HUMAN	#N/A	#N/A	#N/A	0.0641403	-0.189913
sp|P46783|RS10_HUMAN	RS10_HUMAN	RPS10	4.61854	2.14908	0.0633955	0.0773532
sp|O96011|PX11B_HUMAN	PX11B_HUMAN	PEX11B	2.85019	1.68825	0.0631499	0.204706
sp|Q8NBF6|AVL9_HUMAN	AVL9_HUMAN	AVL9	0	0	0.0626318	0.109978
sp|P42695|CNDD3_HUMAN	CNDD3_HUMAN	NCAPD3	1.14205	1.06867	0.0615793	0.150029
sp|P09874|PARP1_HUMAN	PARP1_HUMAN	PARP1	4.68565	2.16464	0.061527	-0.133494
sp|Q5HYI7|MTX3_HUMAN	MTX3_HUMAN	MTX3	3.14745	1.7741	0.0612918	0.220246
sp|O95202|LETM1_HUMAN	LETM1_HUMAN	LETM1	4.51019	2.12372	0.0612603	0.278309
sp|P18031|PTN1_HUMAN	PTN1_HUMAN	PTPN1	3.56323	1.88765	0.0609013	0.09696
sp|P49411|EFTU_HUMAN	EFTU_HUMAN	TUFM	4.01646	2.00411	0.060499	-0.151126
sp|Q86UE4|LYRIC_HUMAN	LYRIC_HUMAN	MTDH	2.95617	1.71935	0.058888	0.209476
sp|Q9HCD6|TANC2_HUMAN	TANC2_HUMAN	TANC2	1.62683	1.27547	0.0587733	0.161686
sp|Q8NE71|ABCF1_HUMAN	ABCF1_HUMAN	ABCF1	4.31132	2.07637	0.0586795	0.156761
sp|Q9NV70|EXOC1_HUMAN	EXOC1_HUMAN	EXOC1	0	0	0.0584616	0.169157
sp|Q14241|ELOA1_HUMAN	ELOA1_HUMAN	ELOA	1.43361	1.19734	0.0583521	-0.245132
sp|O15063|K0355_HUMAN	K0355_HUMAN	KIAA0355	45.0149	6.70931	0.058161	-0.400589
sp|P60866|RS20_HUMAN	RS20_HUMAN	RPS20	2.27445	1.50813	0.0576445	0.219403
sp|P61247|RS3A_HUMAN	RS3A_HUMAN	RPS3A	3.95862	1.98963	0.0575937	-0.252264
sp|Q8IVF2|AHNK2_HUMAN	AHNK2_HUMAN	AHNAK2	3.7128	1.92686	0.0573907	0.298297
sp|P19367|HXK1_HUMAN	HXK1_HUMAN	HK1	8.99228	2.99871	0.05695	0.19078
sp|Q9BPX6|MICU1_HUMAN	MICU1_HUMAN	MICU1	2.59454	1.61076	0.0548213	0.159886
sp|Q9HCU5|PREB_HUMAN	PREB_HUMAN	PREB	2.15602	1.46834	0.0545944	-0.201897
sp|Q14331|FRG1_HUMAN	FRG1_HUMAN	FRG1	1.03158	1.01567	0.0540727	0.178715
sp|Q13464|ROCK1_HUMAN	ROCK1_HUMAN	ROCK1	1.19937	1.09516	0.0535167	0.176473
sp|Q13136|LIPA1_HUMAN	LIPA1_HUMAN	PPFIA1	1.03541	1.01755	0.0528487	-0.154446
sp|Q08379|GOGA2_HUMAN	GOGA2_HUMAN	GOLGA2	2.5252	1.58909	0.0524027	0.182581
sp|Q99623|PHB2_HUMAN	PHB2_HUMAN	PHB2	2.50001	1.58114	0.0520048	-0.224295
sp|Q9NUQ8|ABCF3_HUMAN	ABCF3_HUMAN	ABCF3	0	0	0.0514881	-0.0849993
sp|Q8TDD1|DDX54_HUMAN	DDX54_HUMAN	DDX54	2.625	1.62019	0.050919	0.280725
sp|P04843|RPN1_HUMAN	RPN1_HUMAN	RPN1	1.45439	1.20598	0.0508657	-0.172164
sp|P30050|RL12_HUMAN	RL12_HUMAN	RPL12	0	0	0.0501002	0.118467
sp|Q8N6R0|MET13_HUMAN	MET13_HUMAN	METTL13	4.98989	2.23381	0.0498714	0.132989
sp|Q13596|SNX1_HUMAN	SNX1_HUMAN	SNX1	2.18723	1.47893	0.0492632	-0.19758
sp|P23396|RS3_HUMAN	RS3_HUMAN	RPS3	4.15939	2.03946	0.0489931	0.168473
sp|Q9NX58|LYAR_HUMAN	LYAR_HUMAN	LYAR	5.73791	2.39539	0.0489503	-0.0878877
sp|P46778|RL21_HUMAN	RL21_HUMAN	RPL21	3.0133	1.73588	0.0482396	0.180417
sp|P11586|C1TC_HUMAN	C1TC_HUMAN	MTHFD1	3.66953	1.9156	0.0481921	0.191342
sp|Q9Y2X9|ZN281_HUMAN	ZN281_HUMAN	ZNF281	2.39729	1.54832	0.0480611	0.151004
sp|Q99755|PI51A_HUMAN	PI51A_HUMAN	PIP5K1A	1.07572	1.03717	0.0479171	-0.177564
sp|P18206|VINC_HUMAN	VINC_HUMAN	VCL	0.855939	0.92517	0.0478088	0.237781
sp|P32121|ARRB2_HUMAN	ARRB2_HUMAN	ARRB2	1.88991	1.37474	0.0472962	-0.175724
sp|Q9Y678|COPG1_HUMAN	COPG1_HUMAN	COPG1	0	0	0.0465821	0.125346
sp|Q9NX63|MIC19_HUMAN	MIC19_HUMAN	CHCHD3	0	0	0.0462668	-0.0709058
sp|O00750|P3C2B_HUMAN	P3C2B_HUMAN	PIK3C2B	1.70083	1.30416	0.0458332	-0.117653
sp|P50402|EMD_HUMAN	EMD_HUMAN	EMD	1.6733	1.29356	0.0458202	-0.123497
sp|Q9HDC5|JPH1_HUMAN	JPH1_HUMAN	JPH1	4.18903	2.04671	0.0454764	0.128045
sp|Q9NZZ3|CHMP5_HUMAN	CHMP5_HUMAN	CHMP5	0	0	0.0452588	0.131118
sp|Q9Y2X3|NOP58_HUMAN	NOP58_HUMAN	NOP58	3.0714	1.75254	0.0446917	0.148788
sp|P36542|ATPG_HUMAN	ATPG_HUMAN	ATP5F1C	3.28148	1.81149	0.0441532	0.157905
sp|Q6GYQ0|RGPA1_HUMAN	RGPA1_HUMAN	RALGAPA1	1.46674	1.21109	0.0436874	-0.114475
sp|Q9H5V9|CX056_HUMAN	CX056_HUMAN	CXorf56	1.07828	1.0384	0.0435568	0.163366
sp|Q9H8G2|CAAP1_HUMAN	CAAP1_HUMAN	CAAP1	0	0	0.043389	0.117896
sp|P62851|RS25_HUMAN	RS25_HUMAN	RPS25	2.70417	1.64443	0.0425701	-0.112041
sp|Q15648|MED1_HUMAN	MED1_HUMAN	MED1	0	0	0.0421867	-0.0817225
sp|Q96C57|CL043_HUMAN	CL043_HUMAN	CUSTOS	0	0	0.0417542	0.120243
sp|O75592|MYCB2_HUMAN	MYCB2_HUMAN	MYCBP2	5.02398	2.24142	0.0411912	-0.198457
sp|P62273|RS29_HUMAN	RS29_HUMAN	RPS29	1.79002	1.33792	0.0409294	-0.207486
sp|Q96QD8|S38A2_HUMAN	S38A2_HUMAN	SLC38A2	0	0	0.0407232	0.171642
sp|P14618|KPYM_HUMAN	KPYM_HUMAN	PKM	2.41237	1.55318	0.0402522	0.127138
sp|Q96P70|IPO9_HUMAN	IPO9_HUMAN	IPO9	0	0	0.0394244	0.0997826
sp|P40763|STAT3_HUMAN	STAT3_HUMAN	STAT3	1.35028	1.16202	0.0381205	-0.123641
sp|Q9Y383|LC7L2_HUMAN	LC7L2_HUMAN	LUC7L2	0.970829	0.985307	0.0380744	-0.1716
sp|Q96HS1|PGAM5_HUMAN	PGAM5_HUMAN	PGAM5	2.36318	1.53727	0.0378293	-0.0916243
sp|Q66PJ3|AR6P4_HUMAN	AR6P4_HUMAN	ARL6IP4	1.77391	1.33188	0.0370821	-0.141232
sp|Q8IWJ2|GCC2_HUMAN	GCC2_HUMAN	GCC2	8.43905	2.905	0.0357123	0.195918
sp|Q9H6J7|CK049_HUMAN	CK049_HUMAN	C11orf49	2.1203	1.45613	0.0357076	0.0910376
sp|P40855|PEX19_HUMAN	PEX19_HUMAN	PEX19	0.985332	0.992639	0.0351951	0.139975
sp|O95831|AIFM1_HUMAN	AIFM1_HUMAN	AIFM1	3.96475	1.99117	0.0332282	0.0949817
sp|P49757|NUMB_HUMAN	NUMB_HUMAN	NUMB	2.45777	1.56773	0.0327411	0.127912
sp|Q9Y394|DHRS7_HUMAN	DHRS7_HUMAN	DHRS7	1.17625	1.08455	0.032396	-0.119018
sp|P62280|RS11_HUMAN	RS11_HUMAN	RPS11	3.09918	1.76045	0.032299	0.122517
sp|Q9NWB6|ARGL1_HUMAN	ARGL1_HUMAN	ARGLU1	6.36191	2.52228	0.0318805	0.143069
sp|Q92575|UBXN4_HUMAN	UBXN4_HUMAN	UBXN4	3.46191	1.86062	0.0316767	0.0805448
sp|Q96EY4|TMA16_HUMAN	TMA16_HUMAN	TMA16	2.33302	1.52742	0.0310619	-0.12965
sp|P51149|RAB7A_HUMAN	RAB7A_HUMAN	RAB7A	13.2128	3.63495	0.0298743	0.142107
sp|Q00325|MPCP_HUMAN	MPCP_HUMAN	SLC25A3	2.73377	1.65341	0.0296183	-0.0751175
sp|Q08211|DHX9_HUMAN	DHX9_HUMAN	DHX9	1.98874	1.41023	0.0295156	0.0639696
sp|Q9NX40|OCAD1_HUMAN	OCAD1_HUMAN	OCIAD1	3.42174	1.84979	0.0293993	-0.0951626
sp|O15027|SC16A_HUMAN	SC16A_HUMAN	SEC16A	1.75718	1.32559	0.028939	0.104946
sp|O60841|IF2P_HUMAN	IF2P_HUMAN	EIF5B	5.31532	2.3055	0.0287102	-0.108629
sp|Q9Y2Z0|SGT1_HUMAN	SGT1_HUMAN	SUGT1	3.65632	1.91215	0.0284929	0.111844
sp|P20340|RAB6A_HUMAN	RAB6A_HUMAN	RAB6A	38.488	6.20387	0.027481	0.134643
sp|A6NKT7|RGPD3_HUMAN	RGPD3_HUMAN	#N/A	#N/A	#N/A	0.0271216	-0.0909578
sp|P61513|RL37A_HUMAN	RL37A_HUMAN	RPL37A	3.85218	1.9627	0.0261263	-0.0728346
sp|P61081|UBC12_HUMAN	UBC12_HUMAN	UBE2M	0	0	0.0250886	0.085469
sp|Q96KG9|SCYL1_HUMAN	SCYL1_HUMAN	SCYL1	0	0	0.0241778	0.0661894
sp|Q9BXB4|OSB11_HUMAN	OSB11_HUMAN	OSBPL11	1.20835	1.09925	0.0239731	0.0643142
sp|Q9UER7|DAXX_HUMAN	DAXX_HUMAN	DAXX	2.33398	1.52774	0.0239321	-0.089897
sp|P63173|RL38_HUMAN	RL38_HUMAN	RPL38	2.63217	1.6224	0.0231659	0.0892748
sp|Q9Y4P3|TBL2_HUMAN	TBL2_HUMAN	TBL2	0.826674	0.909216	0.0230291	-0.0819933
sp|Q6ZNB6|NFXL1_HUMAN	NFXL1_HUMAN	NFXL1	1.90044	1.37856	0.0214283	-0.0528636
sp|P62424|RL7A_HUMAN	RL7A_HUMAN	RPL7A	2.8678	1.69346	0.0213129	0.0666043
sp|O00567|NOP56_HUMAN	NOP56_HUMAN	NOP56	2.91525	1.70741	0.0208592	0.0988275
sp|O95861|BPNT1_HUMAN	BPNT1_HUMAN	BPNT1	0	0	0.0200194	-0.0568168
sp|Q9P2D1|CHD7_HUMAN	CHD7_HUMAN	CHD7	0	0	0.0199089	-0.0367212
sp|Q9Y5K6|CD2AP_HUMAN	CD2AP_HUMAN	CD2AP	3.34244	1.82823	0.0195346	-0.0905706
sp|P84098|RL19_HUMAN	RL19_HUMAN	RPL19	3.95042	1.98757	0.0193592	-0.0271479
sp|P13861|KAP2_HUMAN	KAP2_HUMAN	PRKAR2A	3.04759	1.74573	0.0188508	-0.080997
sp|P30519|HMOX2_HUMAN	HMOX2_HUMAN	HMOX2	0.905037	0.951334	0.0174593	-0.0691398
sp|P53804|TTC3_HUMAN	TTC3_HUMAN	TTC3	5.24564	2.29034	0.0171582	-0.0685028
sp|P12270|TPR_HUMAN	TPR_HUMAN	TPR	8.52805	2.92028	0.0169563	-0.0604621
sp|Q9Y3T9|NOC2L_HUMAN	NOC2L_HUMAN	NOC2L	0	0	0.0164615	-0.047772
sp|P61586|RHOA_HUMAN;sp|P08134|RHOC_HUMAN	RHOA_HUMAN	RHOA	3.86482	1.96591	0.0161888	0.0938645
sp|O95292|VAPB_HUMAN	VAPB_HUMAN	VAPB	2.47192	1.57224	0.01494	-0.0485074
sp|O60343|TBCD4_HUMAN	TBCD4_HUMAN	TBC1D4	15.3117	3.91302	0.0147085	-0.0475142
sp|P06733|ENOA_HUMAN	ENOA_HUMAN	ENO1	2.11171	1.45317	0.0133169	-0.0476073
sp|O94826|TOM70_HUMAN	TOM70_HUMAN	TOMM70	3.41314	1.84747	0.011923	-0.0363494
sp|Q8TD19|NEK9_HUMAN	NEK9_HUMAN	NEK9	0	0	0.011905	0.0415845
sp|Q13642|FHL1_HUMAN	FHL1_HUMAN	FHL1	0	0	0.0118244	-0.0411235
sp|O75410|TACC1_HUMAN	TACC1_HUMAN	TACC1	3.36587	1.83463	0.0115145	0.0642739
sp|Q9UPS8|ANR26_HUMAN	ANR26_HUMAN	ANKRD26	1.79516	1.33984	0.0114782	0.0462361
sp|P56589|PEX3_HUMAN	PEX3_HUMAN	PEX3	0	0	0.00848071	0.0293403
sp|O75400|PR40A_HUMAN	PR40A_HUMAN	PRPF40A	3.36468	1.83431	0.00811154	0.0379506
sp|O95470|SGPL1_HUMAN	SGPL1_HUMAN	SGPL1	0.970886	0.985335	0.00734041	-0.0337716
sp|Q15652|JHD2C_HUMAN	JHD2C_HUMAN	JMJD1C	2.18757	1.47904	0.00707202	-0.0156904
sp|P06748|NPM_HUMAN	NPM_HUMAN	NPM1	1.21171	1.10078	0.00611839	0.024022
sp|Q96HE9|PRR11_HUMAN	PRR11_HUMAN	PRR11	0	0	0.00433316	0.0108779
sp|P50479|PDLI4_HUMAN	PDLI4_HUMAN	PDLIM4	0	0	0.00361062	-0.0117844
sp|P36578|RL4_HUMAN	RL4_HUMAN	RPL4	0	0	0.00289743	0.00999276
sp|O75116|ROCK2_HUMAN	ROCK2_HUMAN	ROCK2	4.18942	2.04681	0.00246346	0.00895805
sp|P40616|ARL1_HUMAN	ARL1_HUMAN	ARL1	1.95668	1.39881	0.00236357	0.00601091
sp|Q9Y385|UB2J1_HUMAN	UB2J1_HUMAN	UBE2J1	3.44312	1.85557	0.0021661	-0.00807699
sp|O14964|HGS_HUMAN	HGS_HUMAN	HGS	0	0	0.0015584	-0.00467693
sp|P54578|UBP14_HUMAN	UBP14_HUMAN	USP14	0	0	0.000695254	-0.00173259
sp|Q8IYB3|SRRM1_HUMAN	SRRM1_HUMAN	SRRM1	3.46276	1.86085	0.000421897	-0.00209017
sp|P32119|PRDX2_HUMAN	PRDX2_HUMAN	PRDX2	2.9362	1.71353	0.000239676	0.000480424
sp|Q96A49|SYAP1_HUMAN	SYAP1_HUMAN	SYAP1	2.59964	1.61234	3.41017e-05	0.000114933
sp|Q9BZF9|UACA_HUMAN	UACA_HUMAN	UACA	3.61972	1.90256	1.27965e-05	-5.35377e-05

## Sheet: Cdc42 SN
Majority protein IDs	Uniprot	Gene NAME	WD score	Root WD score	Log Student's T-test p-value Cdc42 SN	Student's T-test Difference Cdc42 SN
sp|P60953|CDC42_HUMAN	CDC42_HUMAN	CDC42	6903.16	83.0853	28.1318	13.3712
sp|Q5JSL3|DOC11_HUMAN	DOC11_HUMAN	DOCK11	7416.4	86.1185	26.2635	11.4663
sp|Q9BZ29|DOCK9_HUMAN	DOCK9_HUMAN	DOCK9	3508.04	59.2287	23.2978	10.4373
sp|O60879|DIAP2_HUMAN	DIAP2_HUMAN	DIAPH2	147.403	12.141	10.7819	4.55011
sp|Q96II8|LRCH3_HUMAN	LRCH3_HUMAN	LRCH3	3924.05	62.6422	9.24841	6.31369
sp|Q5VUJ6|LRCH2_HUMAN	LRCH2_HUMAN	LRCH2	2616.1	51.1478	8.29458	5.45627
sp|A7KAX9|RHG32_HUMAN	RHG32_HUMAN	ARHGAP32	346.606	18.6174	7.71069	6.18451
sp|Q96HP0|DOCK6_HUMAN	DOCK6_HUMAN	DOCK6	5349.95	73.1434	6.91546	8.67803
sp|Q96N67|DOCK7_HUMAN	DOCK7_HUMAN	DOCK7	259.176	16.0989	6.38126	10.6388
sp|O15085|ARHGB_HUMAN	ARHGB_HUMAN	ARHGEF11	325.595	18.0443	6.10351	4.74967
sp|P40763|STAT3_HUMAN	STAT3_HUMAN	STAT3	67.463	8.21359	6.03783	5.24579
sp|O60645|EXOC3_HUMAN	EXOC3_HUMAN	EXOC3	100.371	10.0186	5.45442	3.77051
sp|Q7Z6J0|SH3R1_HUMAN	SH3R1_HUMAN	SH3RF1	276.331	16.6232	5.44783	3.40568
sp|Q9Y5S2|MRCKB_HUMAN	MRCKB_HUMAN	CDC42BPB	6.08089	2.46595	5.12571	2.87125
sp|P50479|PDLI4_HUMAN	PDLI4_HUMAN	PDLIM4	170.549	13.0594	4.87608	4.55177
sp|Q5T5U3|RHG21_HUMAN	RHG21_HUMAN	ARHGAP21	103.195	10.1585	4.78967	3.70579
sp|Q9NP61|ARFG3_HUMAN	ARFG3_HUMAN	ARFGAP3	58.7599	7.6655	4.6606	4.04056
sp|Q15058|KIF14_HUMAN	KIF14_HUMAN	KIF14	52.0742	7.21624	4.5955	7.45952
sp|Q8WU79|SMAP2_HUMAN	SMAP2_HUMAN	SMAP2	2.94437	1.71592	4.51755	2.82728
sp|O95835|LATS1_HUMAN	LATS1_HUMAN	LATS1	4.57931	2.13993	4.34237	2.55039
sp|Q9NSV4|DIAP3_HUMAN	DIAP3_HUMAN	DIAPH3	42.2585	6.50065	4.20656	4.85217
sp|Q9NZM3|ITSN2_HUMAN	ITSN2_HUMAN	ITSN2	0	0	4.17525	3.66592
sp|Q5HYK7|SH319_HUMAN	SH319_HUMAN	SH3D19	90.1984	9.49729	4.03198	3.70691
sp|Q5VT25|MRCKA_HUMAN	MRCKA_HUMAN	CDC42BPA	164.259	12.8163	4.0056	5.62415
sp|Q99961|SH3G1_HUMAN	SH3G1_HUMAN	SH3GL1	7.64133	2.76429	3.93679	3.72709
sp|Q07960|RHG01_HUMAN	RHG01_HUMAN	ARHGAP1	26.1901	5.11763	3.91225	7.3819
sp|Q9NRN7|ADPPT_HUMAN	ADPPT_HUMAN	AASDHPPT	0	0	3.78673	2.58774
sp|Q9UQB8|BAIP2_HUMAN	BAIP2_HUMAN	BAIAP2	8.23794	2.87018	3.57296	2.30508
sp|Q13492|PICAL_HUMAN	PICAL_HUMAN	PICALM	34.8086	5.89988	3.57279	3.2883
sp|Q96L33|RHOV_HUMAN;sp|Q7L0Q8|RHOU_HUMAN	RHOV_HUMAN	#N/A	#N/A	#N/A	3.55976	2.69902
sp|P61313|RL15_HUMAN	RL15_HUMAN	RPL15	2.73209	1.6529	3.44617	2.8869
sp|P63000|RAC1_HUMAN;sp|P60763|RAC3_HUMAN;sp|P15153|RAC2_HUMAN	RAC1_HUMAN	RAC1	0	0	3.33377	8.12577
sp|Q92540|SMG7_HUMAN	SMG7_HUMAN	SMG7	17.4739	4.18018	3.30298	4.08827
sp|O75427|LRCH4_HUMAN	LRCH4_HUMAN	LRCH4	14.7279	3.83769	3.29059	2.36551
sp|Q13625|ASPP2_HUMAN	ASPP2_HUMAN	TP53BP2	67.9766	8.24479	3.19942	3.98197
sp|Q9Y2I7|FYV1_HUMAN	FYV1_HUMAN	PIKFYVE	75.8947	8.71176	3.09921	2.78683
sp|Q15208|STK38_HUMAN	STK38_HUMAN	STK38	17.8837	4.22891	3.06676	3.88049
sp|Q9BY89|K1671_HUMAN	K1671_HUMAN	KIAA1671	236.544	15.38	3.01818	2.7187
sp|P42694|HELZ_HUMAN	HELZ_HUMAN	HELZ	26.5481	5.15249	2.99631	3.98455
sp|Q16513|PKN2_HUMAN	PKN2_HUMAN	PKN2	37.0834	6.08961	2.87384	3.9886
sp|Q96HC4|PDLI5_HUMAN	PDLI5_HUMAN	PDLIM5	7.2603	2.69449	2.85152	4.17913
sp|P25054|APC_HUMAN	APC_HUMAN	APC	79.319	8.90612	2.8423	2.02455
sp|Q6P1N0|C2D1A_HUMAN	C2D1A_HUMAN	CC2D1A	138.369	11.763	2.75283	2.72708
sp|Q9P0T7|TMEM9_HUMAN	TMEM9_HUMAN	TMEM9	48.7879	6.98483	2.748	2.34326
sp|P34897|GLYM_HUMAN	GLYM_HUMAN	SHMT2	0	0	2.72969	2.36661
sp|P35606|COPB2_HUMAN	COPB2_HUMAN	COPB2	0	0	2.7162	2.15484
sp|Q9NPI6|DCP1A_HUMAN	DCP1A_HUMAN	DCP1A	84.3868	9.18623	2.71214	2.30758
sp|Q9NYJ8|TAB2_HUMAN	TAB2_HUMAN	TAB2	11.2755	3.35791	2.70832	2.67857
sp|Q2M1P5|KIF7_HUMAN	KIF7_HUMAN	KIF7	16.3599	4.04474	2.69501	2.88376
sp|Q9NRY4|RHG35_HUMAN	RHG35_HUMAN	ARHGAP35	90.9881	9.53877	2.67413	4.36482
sp|P62304|RUXE_HUMAN	RUXE_HUMAN	SNRPE	25.3012	5.03003	2.64463	2.41291
sp|Q9P227|RHG23_HUMAN	RHG23_HUMAN	ARHGAP23	0	0	2.53573	1.5122
sp|Q96JQ2|CLMN_HUMAN	CLMN_HUMAN	CLMN	3.23651	1.79903	2.51892	2.53768
sp|Q5T8P6|RBM26_HUMAN	RBM26_HUMAN	RBM26	20.1303	4.48668	2.5163	3.44337
sp|P62979|RS27A_HUMAN;sp|P0CG47|UBB_HUMAN;sp|P0CG48|UBC_HUMAN	RS27A_HUMAN	RPS27A	4.63094	2.15196	2.50501	-1.12003
sp|Q9UHD8|SEPT9_HUMAN	SEPT9_HUMAN	SEPTIN9	15.3304	3.9154	2.49125	2.31159
sp|Q5T6F2|UBAP2_HUMAN	UBAP2_HUMAN	UBAP2	5.84384	2.4174	2.47623	3.70408
sp|Q1ED39|KNOP1_HUMAN	KNOP1_HUMAN	KNOP1	1.42857	1.19523	2.46754	-3.6607
sp|Q9UKK9|NUDT5_HUMAN	NUDT5_HUMAN	NUDT5	31.2137	5.58692	2.46223	2.21819
sp|Q9Y4G8|RPGF2_HUMAN	RPGF2_HUMAN	RAPGEF2	0	0	2.43219	2.17333
sp|Q2M2I8|AAK1_HUMAN	AAK1_HUMAN	AAK1	18.0145	4.24435	2.401	2.84034
sp|P78318|IGBP1_HUMAN	IGBP1_HUMAN	IGBP1	2.77967	1.66723	2.39809	2.07258
sp|Q8N511|TM199_HUMAN	TM199_HUMAN	TMEM199	2.54112	1.59409	2.36832	2.50739
sp|Q14651|PLSI_HUMAN	PLSI_HUMAN	PLS1	9.54666	3.08977	2.35407	1.71764
sp|Q7Z5P9|MUC19_HUMAN	MUC19_HUMAN	MUC19	0	0	2.34016	6.24321
sp|Q92974|ARHG2_HUMAN	ARHG2_HUMAN	ARHGEF2	211.006	14.526	2.31243	4.30918
sp|O95716|RAB3D_HUMAN	RAB3D_HUMAN	RAB3D	0	0	2.30704	1.75885
sp|Q9H3S7|PTN23_HUMAN	PTN23_HUMAN	PTPN23	22.4445	4.73756	2.30532	3.12009
sp|O96013|PAK4_HUMAN	PAK4_HUMAN	PAK4	4.81681	2.19472	2.30151	1.59552
sp|P22392|NDKB_HUMAN;sp|O60361|NDK8_HUMAN	NDKB_HUMAN	NME2	2.71949	1.64909	2.28968	3.56694
sp|Q9H5V9|CX056_HUMAN	CX056_HUMAN	CXorf56	9.09636	3.01602	2.27596	4.03186
sp|Q14145|KEAP1_HUMAN	KEAP1_HUMAN	KEAP1	0	0	2.25955	2.10518
sp|Q9UNY4|TTF2_HUMAN	TTF2_HUMAN	TTF2	132.286	11.5016	2.24735	3.14345
sp|O43426|SYNJ1_HUMAN	SYNJ1_HUMAN	SYNJ1	27.4392	5.23825	2.24467	4.45398
sp|Q8WW12|PCNP_HUMAN	PCNP_HUMAN	PCNP	0	0	2.23878	2.85712
sp|O95487|SC24B_HUMAN	SC24B_HUMAN	SEC24B	19.5957	4.4267	2.21964	3.35445
sp|O14737|PDCD5_HUMAN	PDCD5_HUMAN	PDCD5	15.0972	3.88551	2.21677	1.91258
sp|Q96JH7|VCIP1_HUMAN	VCIP1_HUMAN	VCPIP1	10.9347	3.30676	2.20394	5.11565
sp|P23381|SYWC_HUMAN	SYWC_HUMAN	WARS	92.1781	9.60094	2.19303	2.38606
sp|Q9UPQ3|AGAP1_HUMAN	AGAP1_HUMAN	AGAP1	0	0	2.15765	-3.30307
sp|Q05397|FAK1_HUMAN	FAK1_HUMAN	PTK2	2.35619	1.53499	2.13332	1.61443
sp|O95861|BPNT1_HUMAN	BPNT1_HUMAN	BPNT1	2.40322	1.55023	2.12602	2.69128
sp|Q9H7C9|AAMDC_HUMAN	AAMDC_HUMAN	AAMDC	98.0782	9.90344	2.12165	2.87386
sp|P21796|VDAC1_HUMAN	VDAC1_HUMAN	VDAC1	0	0	2.10701	2.68159
sp|Q3YEC7|RABL6_HUMAN	RABL6_HUMAN	RABL6	1.88413	1.37264	2.09567	-3.85943
sp|Q9Y5A9|YTHD2_HUMAN	YTHD2_HUMAN	YTHDF2	45.5557	6.7495	2.09399	2.64788
sp|P13797|PLST_HUMAN	PLST_HUMAN	PLS3	4.9171	2.21745	2.01408	2.76622
sp|O00750|P3C2B_HUMAN	P3C2B_HUMAN	PIK3C2B	2.94592	1.71637	2.0054	2.53568
sp|Q9HCD6|TANC2_HUMAN	TANC2_HUMAN	TANC2	12.92	3.59444	1.99987	2.26687
sp|O14776|TCRG1_HUMAN	TCRG1_HUMAN	TCERG1	8.3584	2.89109	1.96755	2.85567
sp|P52594|AGFG1_HUMAN	AGFG1_HUMAN	AGFG1	102.492	10.1238	1.95588	2.51734
sp|Q9Y4C1|KDM3A_HUMAN	KDM3A_HUMAN	KDM3A	6.75051	2.59817	1.95568	1.27268
sp|Q6ZSR9|YJ005_HUMAN	YJ005_HUMAN	FLJ45252	30.6482	5.53608	1.94579	2.03235
sp|Q2M1Z3|RHG31_HUMAN	RHG31_HUMAN	ARHGAP31	0	0	1.93625	1.18674
sp|P46940|IQGA1_HUMAN	IQGA1_HUMAN	IQGAP1	33.8847	5.82106	1.93465	1.48111
sp|Q9UM54|MYO6_HUMAN	MYO6_HUMAN	MYO6	16.2297	4.02861	1.934	3.08198
sp|P28288|ABCD3_HUMAN	ABCD3_HUMAN	ABCD3	5.49667	2.3445	1.9007	-1.39003
sp|P84085|ARF5_HUMAN	ARF5_HUMAN	#N/A	#N/A	#N/A	1.88328	1.40575
sp|Q96KG9|SCYL1_HUMAN	SCYL1_HUMAN	SCYL1	10.963	3.31105	1.86724	2.57645
sp|O00151|PDLI1_HUMAN	PDLI1_HUMAN	PDLIM1	6.19356	2.48869	1.85818	2.99008
sp|Q9UKF6|CPSF3_HUMAN	CPSF3_HUMAN	CPSF3	22.5157	4.74507	1.85743	3.50116
sp|Q99848|EBP2_HUMAN	EBP2_HUMAN	EBNA1BP2	0	0	1.84845	2.91994
sp|P46109|CRKL_HUMAN	CRKL_HUMAN	CRKL	5.57751	2.36168	1.8377	2.50703
sp|Q13428|TCOF_HUMAN	TCOF_HUMAN	TCOF1	5.50777	2.34686	1.81786	-1.58714
sp|P22681|CBL_HUMAN	CBL_HUMAN	CBL	5.73325	2.39442	1.77838	2.3726
sp|A1X283|SPD2B_HUMAN	SPD2B_HUMAN	SH3PXD2B	41.8238	6.46713	1.77427	2.63932
sp|Q9UQL6|HDAC5_HUMAN	HDAC5_HUMAN	HDAC5	1.85734	1.36284	1.76923	2.24431
sp|Q05682|CALD1_HUMAN	CALD1_HUMAN	CALD1	5.77287	2.40268	1.76069	3.31111
sp|Q9Y2L9|LRCH1_HUMAN	LRCH1_HUMAN	LRCH1	10.9551	3.30986	1.75492	1.70023
sp|P43003|EAA1_HUMAN	EAA1_HUMAN	SLC1A3	0	0	1.74837	1.6011
sp|Q9UPQ9|TNR6B_HUMAN	TNR6B_HUMAN	TNRC6B	9.6142	3.10068	1.7383	1.90384
sp|O75376|NCOR1_HUMAN	NCOR1_HUMAN	NCOR1	84.6904	9.20274	1.7339	3.00548
sp|Q70E73|RAPH1_HUMAN	RAPH1_HUMAN	RAPH1	11.824	3.43861	1.72522	2.9262
sp|P18621|RL17_HUMAN	RL17_HUMAN	RPL17	3.6828	1.91906	1.72354	-0.964716
sp|O75533|SF3B1_HUMAN	SF3B1_HUMAN	SF3B1	14.8485	3.85337	1.72215	2.43194
sp|Q13613|MTMR1_HUMAN	MTMR1_HUMAN	MTMR1	14.3557	3.78889	1.71037	1.86471
sp|Q8IYB3|SRRM1_HUMAN	SRRM1_HUMAN	SRRM1	0.894944	0.946015	1.70722	-3.6899
sp|Q9Y679|AUP1_HUMAN	AUP1_HUMAN	AUP1	5.7159	2.39079	1.69506	2.80441
sp|P15531|NDKA_HUMAN	NDKA_HUMAN	NME1	19.7323	4.44211	1.67761	2.19542
sp|P30048|PRDX3_HUMAN	PRDX3_HUMAN	PRDX3	5.70153	2.38779	1.6356	2.49327
sp|Q9H6Z4|RANB3_HUMAN	RANB3_HUMAN	RANBP3	16.5719	4.07086	1.63284	2.58871
sp|Q9BZF1|OSBL8_HUMAN	OSBL8_HUMAN	OSBPL8	13.2761	3.64364	1.62312	2.13364
sp|P46108|CRK_HUMAN	CRK_HUMAN	CRK	4.75741	2.18115	1.61669	2.02961
sp|Q13464|ROCK1_HUMAN	ROCK1_HUMAN	ROCK1	7.76546	2.78666	1.57415	2.87398
sp|P54578|UBP14_HUMAN	UBP14_HUMAN	USP14	20.4724	4.52465	1.56699	2.02214
sp|Q5JSH3|WDR44_HUMAN	WDR44_HUMAN	WDR44	21.8207	4.67126	1.56512	3.34533
sp|Q13586|STIM1_HUMAN	STIM1_HUMAN	STIM1	7.19755	2.68282	1.55957	3.46529
sp|P33981|TTK_HUMAN	TTK_HUMAN	TTK	5.45661	2.33594	1.55861	3.26719
sp|O00429|DNM1L_HUMAN	DNM1L_HUMAN	DNM1L	9.83039	3.13534	1.55306	1.88423
sp|P53367|ARFP1_HUMAN	ARFP1_HUMAN	ARFIP1	17.9452	4.23618	1.5499	2.03202
sp|Q9NQG6|MID51_HUMAN	MID51_HUMAN	MIEF1	12.0717	3.47444	1.54698	2.52246
sp|Q7RTP6|MICA3_HUMAN	MICA3_HUMAN	MICAL3	2.96727	1.72258	1.5441	1.38506
sp|P16333|NCK1_HUMAN	NCK1_HUMAN	NCK1	7.9306	2.81613	1.54341	2.45491
sp|O00571|DDX3X_HUMAN;sp|O15523|DDX3Y_HUMAN	DDX3X_HUMAN	DDX3X	4.27918	2.06862	1.54002	3.23275
sp|Q15738|NSDHL_HUMAN	NSDHL_HUMAN	NSDHL	4.35302	2.08639	1.53087	2.83244
sp|Q9NR12|PDLI7_HUMAN	PDLI7_HUMAN	PDLIM7	3.62474	1.90388	1.5293	1.61379
sp|P11387|TOP1_HUMAN	TOP1_HUMAN	TOP1	1.45408	1.20585	1.5216	-2.9803
sp|Q12955|ANK3_HUMAN	ANK3_HUMAN	ANK3	1.51802	1.23208	1.50996	1.98937
sp|P51617|IRAK1_HUMAN	IRAK1_HUMAN	IRAK1	6.30944	2.51186	1.50024	2.66874
sp|Q96QD8|S38A2_HUMAN	S38A2_HUMAN	SLC38A2	5.57538	2.36122	1.49668	3.3187
sp|Q9Y5K6|CD2AP_HUMAN	CD2AP_HUMAN	CD2AP	4.36765	2.08989	1.49455	3.23941
sp|P36405|ARL3_HUMAN	ARL3_HUMAN	ARL3	0	0	1.49145	1.23986
sp|P49790|NU153_HUMAN	NU153_HUMAN	NUP153	10.2405	3.20008	1.48723	4.09467
sp|Q9C0D5|TANC1_HUMAN	TANC1_HUMAN	TANC1	7.29904	2.70167	1.47397	2.55596
sp|O15126|SCAM1_HUMAN	SCAM1_HUMAN	SCAMP1	9.61567	3.10091	1.47233	2.68837
sp|Q92574|TSC1_HUMAN	TSC1_HUMAN	TSC1	10.9281	3.30577	1.46274	2.23121
sp|P62820|RAB1A_HUMAN	RAB1A_HUMAN	RAB1A	4.96015	2.22714	1.44625	2.32186
sp|P62241|RS8_HUMAN	RS8_HUMAN	RPS8	3.09242	1.75853	1.44493	-1.0452
sp|Q12983|BNIP3_HUMAN	BNIP3_HUMAN	BNIP3	15.9682	3.99602	1.44467	2.05446
sp|Q15417|CNN3_HUMAN	CNN3_HUMAN	CNN3	5.42274	2.32868	1.40916	2.95006
sp|O00443|P3C2A_HUMAN	P3C2A_HUMAN	PIK3C2A	26.0838	5.10723	1.40838	3.48609
sp|Q9BR76|COR1B_HUMAN	COR1B_HUMAN	CORO1B	4.79237	2.18915	1.38491	2.27935
sp|Q9GZR7|DDX24_HUMAN	DDX24_HUMAN	DDX24	0.942451	0.970799	1.38022	-3.20354
sp|Q4VCS5|AMOT_HUMAN	AMOT_HUMAN	AMOT	13.7863	3.71299	1.37996	4.49051
sp|Q14160|SCRIB_HUMAN	SCRIB_HUMAN	SCRIB	21.7698	4.66581	1.3764	3.31374
sp|Q8TEU7|RPGF6_HUMAN	RPGF6_HUMAN	RAPGEF6	11.4623	3.3856	1.37221	3.17477
sp|Q96C19|EFHD2_HUMAN	EFHD2_HUMAN	EFHD2	4.4709	2.11445	1.35697	2.63255
sp|Q13642|FHL1_HUMAN	FHL1_HUMAN	FHL1	21.9579	4.68592	1.35626	2.3499
sp|P35611|ADDA_HUMAN	ADDA_HUMAN	ADD1	11.1966	3.34614	1.35523	2.82554
sp|Q14152|EIF3A_HUMAN	EIF3A_HUMAN	EIF3A	0	0	1.34304	1.59444
sp|Q8WWM7|ATX2L_HUMAN	ATX2L_HUMAN	ATXN2L	5.78604	2.40542	1.33441	2.67846
sp|Q9Y2U8|MAN1_HUMAN	MAN1_HUMAN	LEMD3	6.11407	2.47266	1.32702	2.77354
sp|Q8IYB5|SMAP1_HUMAN	SMAP1_HUMAN	SMAP1	45.8652	6.77239	1.32473	2.08336
sp|Q15056|IF4H_HUMAN	IF4H_HUMAN	EIF4H	5.83246	2.41505	1.32277	2.58582
sp|Q8N6T3|ARFG1_HUMAN	ARFG1_HUMAN	ARFGAP1	3.94118	1.98524	1.32089	2.48017
sp|O75694|NU155_HUMAN	NU155_HUMAN	NUP155	6.68458	2.58546	1.32079	3.26206
sp|Q8N8S7|ENAH_HUMAN	ENAH_HUMAN	#N/A	#N/A	#N/A	1.30756	1.00334
sp|Q07820|MCL1_HUMAN	MCL1_HUMAN	MCL1	5.0694	2.25153	1.30399	2.04015
sp|Q12830|BPTF_HUMAN	BPTF_HUMAN	BPTF	30.4199	5.51543	1.3009	2.4869
sp|Q9NT62|ATG3_HUMAN	ATG3_HUMAN	ATG3	0	0	1.29659	0.985113
sp|P61978|HNRPK_HUMAN	HNRPK_HUMAN	HNRNPK	4.13435	2.03331	1.28408	2.42271
sp|Q9Y3E5|PTH2_HUMAN	PTH2_HUMAN	PTRH2	0	0	1.28255	1.27055
sp|Q9P2D6|F135A_HUMAN	F135A_HUMAN	FAM135A	73.2915	8.56104	1.28199	2.56209
sp|P11274|BCR_HUMAN	BCR_HUMAN	BCR	20.3443	4.51047	1.27617	3.04821
sp|P20020|AT2B1_HUMAN	AT2B1_HUMAN	ATP2B1	6.00161	2.44982	1.27234	2.99086
sp|Q8IWB9|TEX2_HUMAN	TEX2_HUMAN	TEX2	15.3749	3.92109	1.26751	1.71693
sp|Q8IUD2|RB6I2_HUMAN	RB6I2_HUMAN	ERC1	7.28891	2.6998	1.26702	3.16469
sp|P16949|STMN1_HUMAN	STMN1_HUMAN	STMN1	8.63591	2.93869	1.25523	2.19406
sp|Q8NAN2|MIGA1_HUMAN	MIGA1_HUMAN	MIGA1	5.51351	2.34809	1.25495	3.62508
sp|Q7Z6Z7|HUWE1_HUMAN	HUWE1_HUMAN	HUWE1	1.28201	1.13226	1.25209	3.08786
sp|Q96EB1|ELP4_HUMAN	ELP4_HUMAN	ELP4	2.27124	1.50706	1.24435	1.55338
sp|Q6FI81|CPIN1_HUMAN	CPIN1_HUMAN	CIAPIN1	18.62	4.31509	1.2439	2.00836
sp|P07737|PROF1_HUMAN	PROF1_HUMAN	PFN1	6.69525	2.58752	1.24038	2.51785
sp|P61927|RL37_HUMAN	RL37_HUMAN	RPL37	6.93834	2.63407	1.23836	2.28197
sp|Q8IWC1|MA7D3_HUMAN	MA7D3_HUMAN	MAP7D3	6.33799	2.51754	1.23564	2.70072
sp|Q7Z569|BRAP_HUMAN	BRAP_HUMAN	BRAP	6.09737	2.46928	1.23129	1.95095
sp|Q9Y613|FHOD1_HUMAN	FHOD1_HUMAN	FHOD1	8.91435	2.98569	1.22586	1.67921
sp|Q9Y5Z9|UBIA1_HUMAN	UBIA1_HUMAN	UBIAD1	0	0	1.22576	2.0542
sp|O15155|BET1_HUMAN	BET1_HUMAN	BET1	127.34	11.2845	1.22374	1.18212
sp|P78344|IF4G2_HUMAN	IF4G2_HUMAN	EIF4G2	6.28441	2.50687	1.21175	2.93242
sp|O43865|SAHH2_HUMAN	SAHH2_HUMAN	AHCYL1	4.61854	2.14908	1.21138	1.0791
sp|P62826|RAN_HUMAN	RAN_HUMAN	RAN	1.20232	1.0965	1.20363	2.16992
sp|O60716|CTND1_HUMAN	CTND1_HUMAN	CTNND1	8.37119	2.8933	1.19617	2.71032
sp|Q9BRX8|F213A_HUMAN	F213A_HUMAN	FAM213A	2.71395	1.64741	1.18671	1.15554
sp|Q8WXE0|CSKI2_HUMAN	CSKI2_HUMAN	CASKIN2	45.1953	6.72274	1.18313	1.09662
sp|Q9Y520|PRC2C_HUMAN	PRC2C_HUMAN	PRRC2C	12.546	3.54203	1.18053	3.72422
sp|Q7Z401|MYCPP_HUMAN	MYCPP_HUMAN	DENND4A	0	0	1.17747	1.38159
sp|O14531|DPYL4_HUMAN	DPYL4_HUMAN	DPYSL4	3.62244	1.90327	1.17623	1.48655
sp|Q9ULC3|RAB23_HUMAN	RAB23_HUMAN	RAB23	0	0	1.17122	1.25003
sp|O75976|CBPD_HUMAN	CBPD_HUMAN	CPD	6.31848	2.51366	1.1559	2.89012
sp|P18031|PTN1_HUMAN	PTN1_HUMAN	PTPN1	4.73384	2.17574	1.14092	1.06959
sp|O43143|DHX15_HUMAN	DHX15_HUMAN	DHX15	0.685571	0.827992	1.13969	-2.39008
sp|Q96T58|MINT_HUMAN	MINT_HUMAN	SPEN	33.9161	5.82375	1.13913	3.26229
sp|Q12965|MYO1E_HUMAN	MYO1E_HUMAN	MYO1E	0.904868	0.951245	1.13065	1.4999
sp|Q9NYV4|CDK12_HUMAN	CDK12_HUMAN	CDK12	5.74752	2.3974	1.13023	1.76784
sp|Q92997|DVL3_HUMAN	DVL3_HUMAN	DVL3	4.83694	2.1993	1.12577	2.6693
sp|Q9UGP4|LIMD1_HUMAN	LIMD1_HUMAN	LIMD1	53.3815	7.30626	1.12407	1.53876
sp|Q8NFC6|BD1L1_HUMAN	BD1L1_HUMAN	BOD1L1	4.21653	2.05342	1.1236	1.14585
sp|P15311|EZRI_HUMAN	EZRI_HUMAN	EZR	4.89049	2.21145	1.12175	2.05281
sp|Q5JRA6|MIA3_HUMAN	MIA3_HUMAN	MIA3	6.26062	2.50212	1.11161	2.66289
sp|Q9HCK8|CHD8_HUMAN	CHD8_HUMAN	CHD8	14.2465	3.77445	1.10621	3.84441
sp|Q14677|EPN4_HUMAN	EPN4_HUMAN	CLINT1	4.91789	2.21763	1.10513	2.60885
sp|Q7Z6K5|ARPIN_HUMAN	ARPIN_HUMAN	ARPIN	3.73828	1.93346	1.0917	2.62996
sp|Q05655|KPCD_HUMAN	KPCD_HUMAN	PRKCD	1.52624	1.23541	1.08654	1.67264
sp|Q14694|UBP10_HUMAN	UBP10_HUMAN	USP10	33.5336	5.79082	1.07576	1.89642
sp|P60468|SC61B_HUMAN	SC61B_HUMAN	SEC61B	0.925693	0.96213	1.0692	-2.3401
sp|Q9Y4P8|WIPI2_HUMAN	WIPI2_HUMAN	WIPI2	5.56004	2.35797	1.05511	2.40957
sp|Q9H3P7|GCP60_HUMAN	GCP60_HUMAN	ACBD3	4.69696	2.16725	1.05507	2.61451
sp|O15056|SYNJ2_HUMAN	SYNJ2_HUMAN	SYNJ2	13.691	3.70014	1.05454	1.59377
sp|O95831|AIFM1_HUMAN	AIFM1_HUMAN	AIFM1	17.1745	4.14421	1.0502	1.73339
sp|P36578|RL4_HUMAN	RL4_HUMAN	RPL4	0	0	1.04794	-1.96313
sp|P54136|SYRC_HUMAN	SYRC_HUMAN	RARS	1.88129	1.3716	1.04701	1.53423
sp|Q13596|SNX1_HUMAN	SNX1_HUMAN	SNX1	5.05329	2.24795	1.04452	2.46436
sp|Q6P3W7|SCYL2_HUMAN	SCYL2_HUMAN	SCYL2	5.22919	2.28674	1.04292	2.72851
sp|O43396|TXNL1_HUMAN	TXNL1_HUMAN	TXNL1	6.22112	2.49422	1.038	2.53319
sp|Q709C8|VP13C_HUMAN	VP13C_HUMAN	VPS13C	31.0843	5.57533	1.03328	3.25221
sp|Q9Y6Y8|S23IP_HUMAN	S23IP_HUMAN	SEC23IP	4.91076	2.21602	1.03316	2.03065
sp|P51610|HCFC1_HUMAN	HCFC1_HUMAN	HCFC1	6.96625	2.63937	1.02433	2.93122
sp|Q03001|DYST_HUMAN	DYST_HUMAN	DST	14.8992	3.85995	1.02423	3.35681
sp|P46821|MAP1B_HUMAN	MAP1B_HUMAN	MAP1B	8.05771	2.83861	1.02371	3.40781
sp|Q96AY4|TTC28_HUMAN	TTC28_HUMAN	TTC28	7.67907	2.77111	1.02146	3.3662
sp|O43432|IF4G3_HUMAN	IF4G3_HUMAN	EIF4G3	17.1001	4.13523	1.0145	2.21292
sp|Q9Y385|UB2J1_HUMAN	UB2J1_HUMAN	UBE2J1	9.16021	3.02658	1.01314	2.13014
sp|Q9Y4E8|UBP15_HUMAN	UBP15_HUMAN	USP15	5.85222	2.41914	1.01104	2.95759
sp|O00213|APBB1_HUMAN	APBB1_HUMAN	APBB1	4.15289	2.03786	1.00643	2.26021
sp|Q9H4A3|WNK1_HUMAN	WNK1_HUMAN	WNK1	2.33831	1.52915	1.0054	1.62715
sp|O75410|TACC1_HUMAN	TACC1_HUMAN	TACC1	6.41077	2.53195	0.999824	3.13781
sp|Q7Z589|EMSY_HUMAN	EMSY_HUMAN	EMSY	19.8857	4.45934	0.992985	2.56692
sp|P17812|PYRG1_HUMAN	PYRG1_HUMAN	CTPS1	6.96349	2.63884	0.991415	2.50587
sp|Q9HCL2|GPAT1_HUMAN	GPAT1_HUMAN	GPAM	6.29649	2.50928	0.991109	2.27671
sp|O75179|ANR17_HUMAN	ANR17_HUMAN	ANKRD17	10.9229	3.30498	0.985766	2.87574
sp|P16615|AT2A2_HUMAN	AT2A2_HUMAN	ATP2A2	2.64679	1.62689	0.983768	-2.48354
sp|Q13190|STX5_HUMAN	STX5_HUMAN	STX5	4.44468	2.10824	0.968679	2.62973
sp|O75663|TIPRL_HUMAN	TIPRL_HUMAN	TIPRL	3.50126	1.87117	0.96748	2.02826
sp|Q86UK7|ZN598_HUMAN	ZN598_HUMAN	ZNF598	3.98286	1.99571	0.966738	1.95951
sp|P62937|PPIA_HUMAN	PPIA_HUMAN	PPIA	12.5988	3.54949	0.965511	1.88382
sp|O60749|SNX2_HUMAN	SNX2_HUMAN	SNX2	0	0	0.963223	1.64566
sp|O95433|AHSA1_HUMAN	AHSA1_HUMAN	AHSA1	7.49057	2.73689	0.956814	1.65175
sp|P51003|PAPOA_HUMAN	PAPOA_HUMAN	PAPOLA	10.3465	3.21659	0.954893	1.45412
sp|Q9Y2H2|SAC2_HUMAN	SAC2_HUMAN	INPP5F	4.3478	2.08514	0.948373	1.8065
sp|Q14008|CKAP5_HUMAN	CKAP5_HUMAN	CKAP5	8.75587	2.95903	0.946431	3.14103
sp|Q9Y6B6|SAR1B_HUMAN	SAR1B_HUMAN	SAR1B	0	0	0.943343	1.53442
sp|Q96AG3|S2546_HUMAN	S2546_HUMAN	SLC25A46	1.45509	1.20627	0.93772	1.79016
sp|Q9UPS8|ANR26_HUMAN	ANR26_HUMAN	ANKRD26	2.19861	1.48277	0.936092	2.32785
sp|P23588|IF4B_HUMAN	IF4B_HUMAN	EIF4B	3.94767	1.98688	0.936005	1.96483
sp|Q5JTV8|TOIP1_HUMAN	TOIP1_HUMAN	TOR1AIP1	4.08207	2.02041	0.934602	1.62043
sp|O75116|ROCK2_HUMAN	ROCK2_HUMAN	ROCK2	22.8796	4.78326	0.932348	1.85502
sp|O75113|N4BP1_HUMAN	N4BP1_HUMAN	N4BP1	12.2391	3.49845	0.929057	2.59505
sp|O95573|ACSL3_HUMAN	ACSL3_HUMAN	ACSL3	7.72643	2.77965	0.929046	2.30664
sp|Q9H8Y8|GORS2_HUMAN	GORS2_HUMAN	GORASP2	3.51015	1.87354	0.92568	2.18528
sp|O14683|P5I11_HUMAN	P5I11_HUMAN	TP53I11	0	0	0.923674	1.79363
sp|Q96CS3|FAF2_HUMAN	FAF2_HUMAN	FAF2	3.32388	1.82315	0.922214	1.81989
sp|A6NGR9|MROH6_HUMAN	MROH6_HUMAN	#N/A	#N/A	#N/A	0.92126	1.5006
sp|Q92575|UBXN4_HUMAN	UBXN4_HUMAN	UBXN4	4.41063	2.10015	0.92124	1.5155
sp|Q96GQ7|DDX27_HUMAN	DDX27_HUMAN	DDX27	0.774087	0.879822	0.9205	-2.4641
sp|Q9Y5V3|MAGD1_HUMAN	MAGD1_HUMAN	MAGED1	1.455	1.20624	0.914828	-1.17032
sp|Q9NRA8|4ET_HUMAN	4ET_HUMAN	EIF4ENIF1	5.19726	2.27975	0.91153	2.33896
sp|Q96AC1|FERM2_HUMAN	FERM2_HUMAN	FERMT2	7.27747	2.69768	0.911375	1.62225
sp|Q9P035|HACD3_HUMAN	HACD3_HUMAN	HACD3	2.67106	1.63434	0.911182	-0.899936
sp|P49069|CAMLG_HUMAN	CAMLG_HUMAN	CAMLG	7.99927	2.8283	0.911044	1.84946
sp|P08240|SRPRA_HUMAN	SRPRA_HUMAN	SRPRA	4.34432	2.0843	0.907156	2.25892
sp|P78347|GTF2I_HUMAN	GTF2I_HUMAN	GTF2I	18.1278	4.25768	0.906608	1.83987
sp|Q96D71|REPS1_HUMAN	REPS1_HUMAN	REPS1	2.98747	1.72843	0.903878	1.04491
sp|O00567|NOP56_HUMAN	NOP56_HUMAN	NOP56	1.37598	1.17302	0.902097	-2.5899
sp|Q8IZH2|XRN1_HUMAN	XRN1_HUMAN	XRN1	7.99038	2.82673	0.902073	2.94888
sp|Q9HAD4|WDR41_HUMAN	WDR41_HUMAN	WDR41	9.48623	3.07997	0.900549	2.30725
sp|P20339|RAB5A_HUMAN	RAB5A_HUMAN	RAB5A	0	0	0.89394	-3.43627
sp|Q3V6T2|GRDN_HUMAN	GRDN_HUMAN	CCDC88A	6.11343	2.47254	0.893486	2.20814
sp|Q9ULM3|YETS2_HUMAN	YETS2_HUMAN	YEATS2	12.9757	3.60217	0.89014	2.35567
sp|O95372|LYPA2_HUMAN	LYPA2_HUMAN	LYPLA2	3.3928	1.84196	0.878862	2.09315
sp|P84098|RL19_HUMAN	RL19_HUMAN	RPL19	3.6828	1.91906	0.874941	-0.733489
sp|Q5JTW2|CEP78_HUMAN	CEP78_HUMAN	CEP78	1.06419	1.0316	0.874369	-2.3155
sp|Q96G28|CFA36_HUMAN	CFA36_HUMAN	CFAP36	0	0	0.872954	-0.768675
sp|Q92968|PEX13_HUMAN	PEX13_HUMAN	PEX13	4.57392	2.13867	0.866723	1.41232
sp|Q13439|GOGA4_HUMAN	GOGA4_HUMAN	GOLGA4	13.9016	3.72848	0.865887	3.42161
sp|Q9P1Q0|VPS54_HUMAN	VPS54_HUMAN	VPS54	2.01567	1.41974	0.864917	0.812206
sp|Q9Y490|TLN1_HUMAN	TLN1_HUMAN	TLN1	10.173	3.18951	0.861516	2.36607
sp|P24752|THIL_HUMAN	THIL_HUMAN	ACAT1	5.98211	2.44583	0.860613	1.97504
sp|Q8IXI2|MIRO1_HUMAN	MIRO1_HUMAN	RHOT1	0	0	0.856348	1.18847
sp|Q9NVU7|SDA1_HUMAN	SDA1_HUMAN	SDAD1	1.28965	1.13563	0.855875	-2.92553
sp|Q9GZY8|MFF_HUMAN	MFF_HUMAN	MFF	4.00956	2.00239	0.855351	2.10849
sp|Q8NI27|THOC2_HUMAN	THOC2_HUMAN	THOC2	8.2582	2.87371	0.855291	2.07235
sp|O15498|YKT6_HUMAN	YKT6_HUMAN	YKT6	4.48056	2.11673	0.852631	0.830906
sp|P62277|RS13_HUMAN	RS13_HUMAN	RPS13	0.800314	0.894603	0.850557	-2.04116
sp|Q15390|MTFR1_HUMAN	MTFR1_HUMAN	MTFR1	8.26434	2.87478	0.850512	1.86241
sp|Q9NZ45|CISD1_HUMAN	CISD1_HUMAN	CISD1	3.97483	1.9937	0.848623	1.33881
sp|P84077|ARF1_HUMAN;sp|P61204|ARF3_HUMAN	ARF1_HUMAN	ARF1	3.59346	1.89564	0.843954	1.10175
sp|Q86TP1|PRUNE_HUMAN	PRUNE_HUMAN	PRUNE1	2.7559	1.66009	0.841483	1.05741
sp|Q16650|TBR1_HUMAN	TBR1_HUMAN	TBR1	0	0	0.840044	1.16363
sp|Q8NDI1|EHBP1_HUMAN	EHBP1_HUMAN	EHBP1	6.8793	2.62284	0.839633	1.44863
sp|P55011|S12A2_HUMAN	S12A2_HUMAN	SLC12A2	2.78526	1.66891	0.838553	-1.1133
sp|O95613|PCNT_HUMAN	PCNT_HUMAN	PCNT	2.98391	1.7274	0.838333	-2.54525
sp|Q9H792|PEAK1_HUMAN	PEAK1_HUMAN	PEAK1	3.95572	1.9889	0.834433	0.971724
sp|Q5VUA4|ZN318_HUMAN	ZN318_HUMAN	ZNF318	10.8571	3.29501	0.833138	1.30612
sp|Q5SW79|CE170_HUMAN	CE170_HUMAN	CEP170	7.40101	2.72048	0.827138	2.7457
sp|P63241|IF5A1_HUMAN;sp|Q6IS14|IF5AL_HUMAN;sp|Q9GZV4|IF5A2_HUMAN	IF5A1_HUMAN	EIF5A	6.54875	2.55905	0.825664	1.66718
sp|Q96P47|AGAP3_HUMAN	AGAP3_HUMAN	AGAP3	1.35793	1.1653	0.823211	-1.64977
sp|Q14980|NUMA1_HUMAN	NUMA1_HUMAN	NUMA1	7.61141	2.75888	0.822999	2.51564
sp|O75643|U520_HUMAN	U520_HUMAN	SNRNP200	0	0	0.822054	-1.77802
sp|Q96BY7|ATG2B_HUMAN	ATG2B_HUMAN	ATG2B	6.37557	2.52499	0.816314	2.54644
sp|Q2NKX8|ERC6L_HUMAN	ERC6L_HUMAN	ERCC6L	12.006	3.46497	0.808502	2.2433
sp|P62861|RS30_HUMAN	RS30_HUMAN	FAU	4.31003	2.07606	0.80221	0.973607
sp|Q96RL7|VP13A_HUMAN	VP13A_HUMAN	VPS13A	8.60517	2.93346	0.800577	2.54149
sp|Q92900|RENT1_HUMAN	RENT1_HUMAN	UPF1	8.96737	2.99456	0.794476	1.72098
sp|Q9UHQ9|NB5R1_HUMAN	NB5R1_HUMAN	CYB5R1	3.81683	1.95367	0.79307	1.91472
sp|P37802|TAGL2_HUMAN	TAGL2_HUMAN	TAGLN2	5.00817	2.23789	0.790376	1.23181
sp|Q5VT66|MARC1_HUMAN	MARC1_HUMAN	MARC1	12.4384	3.52681	0.786843	1.75211
sp|P42566|EPS15_HUMAN	EPS15_HUMAN	EPS15	4.20286	2.05009	0.785519	1.78137
sp|Q8IWZ3|ANKH1_HUMAN	ANKH1_HUMAN	ANKHD1	8.2188	2.86685	0.785371	2.96088
sp|Q6MZP7|LIN54_HUMAN	LIN54_HUMAN	LIN54	1.76947	1.33021	0.77768	1.27895
sp|P08238|HS90B_HUMAN	HS90B_HUMAN	HSP90AB1	5.55586	2.35709	0.774806	-1.03227
sp|Q8TBA6|GOGA5_HUMAN	GOGA5_HUMAN	GOLGA5	5.54771	2.35536	0.773728	2.25182
sp|Q8N0X7|SPG20_HUMAN	SPG20_HUMAN	SPART	4.26263	2.06461	0.762498	1.79126
sp|P33176|KINH_HUMAN	KINH_HUMAN	KIF5B	11.5237	3.39466	0.759746	1.86357
sp|Q5SQN1|SNP47_HUMAN	SNP47_HUMAN	SNAP47	9.3248	3.05365	0.759136	1.66329
sp|Q96EA4|SPDLY_HUMAN	SPDLY_HUMAN	SPDL1	2.19442	1.48136	0.750794	1.26423
sp|Q13371|PHLP_HUMAN	PHLP_HUMAN	PDCL	4.6323	2.15228	0.749556	2.0852
sp|O94991|SLIK5_HUMAN	SLIK5_HUMAN	SLITRK5	4.41472	2.10112	0.748801	1.83269
sp|Q9UQ35|SRRM2_HUMAN	SRRM2_HUMAN	SRRM2	3.30129	1.81694	0.746259	-2.64771
sp|Q92616|GCN1_HUMAN	GCN1_HUMAN	GCN1	1.69274	1.30105	0.742001	-2.00316
sp|Q7Z478|DHX29_HUMAN	DHX29_HUMAN	DHX29	20.3332	4.50923	0.736301	2.09884
sp|Q8TCU4|ALMS1_HUMAN	ALMS1_HUMAN	ALMS1	10.342	3.2159	0.730217	2.11866
sp|Q96MW1|CCD43_HUMAN	CCD43_HUMAN	CCDC43	5.22627	2.2861	0.727778	1.78892
sp|P55196|AFAD_HUMAN	AFAD_HUMAN	AFDN	16.4501	4.05587	0.726099	2.2089
sp|Q92545|TM131_HUMAN	TM131_HUMAN	TMEM131	0	0	0.725829	0.960641
sp|Q15836|VAMP3_HUMAN	VAMP3_HUMAN	VAMP3	0.85308	0.923623	0.724455	1.55698
sp|Q9HAU0|PKHA5_HUMAN	PKHA5_HUMAN	PLEKHA5	2.46774	1.5709	0.724308	1.26581
sp|Q9HB21|PKHA1_HUMAN	PKHA1_HUMAN	PLEKHA1	22.9127	4.78672	0.724066	0.907652
sp|P07814|SYEP_HUMAN	SYEP_HUMAN	EPRS	0	0	0.723244	-1.98889
sp|Q71RC2|LARP4_HUMAN	LARP4_HUMAN	LARP4	2.91418	1.7071	0.720355	1.67975
sp|P13804|ETFA_HUMAN	ETFA_HUMAN	ETFA	13.6864	3.69951	0.719415	2.01058
sp|Q9P2E9|RRBP1_HUMAN	RRBP1_HUMAN	RRBP1	10.7148	3.27335	0.719148	2.82167
sp|O95470|SGPL1_HUMAN	SGPL1_HUMAN	SGPL1	0.840812	0.916958	0.717894	-2.18925
sp|Q8WVX9|FACR1_HUMAN	FACR1_HUMAN	FAR1	0	0	0.709177	-0.966764
sp|Q5VZ89|DEN4C_HUMAN	DEN4C_HUMAN	DENND4C	11.1646	3.34135	0.707115	2.23855
sp|Q5VV42|CDKAL_HUMAN	CDKAL_HUMAN	CDKAL1	5.66851	2.38086	0.704284	1.6192
sp|P27816|MAP4_HUMAN	MAP4_HUMAN	MAP4	5.46301	2.33731	0.69927	2.18478
sp|Q9UHI8|ATS1_HUMAN	ATS1_HUMAN	ADAMTS1	0	0	0.69917	0.960124
sp|Q9ULE6|PALD_HUMAN	PALD_HUMAN	PALD1	6.43488	2.53671	0.69788	2.00301
sp|Q9UDT6|CLIP2_HUMAN	CLIP2_HUMAN	#N/A	#N/A	#N/A	0.697238	1.60214
sp|Q96S99|PKHF1_HUMAN	PKHF1_HUMAN	PLEKHF1	0	0	0.696599	-1.28067
sp|Q9P0K7|RAI14_HUMAN	RAI14_HUMAN	RAI14	5.56592	2.35922	0.694105	2.06818
sp|Q7Z3T8|ZFY16_HUMAN	ZFY16_HUMAN	ZFYVE16	11.421	3.3795	0.693741	1.26582
sp|Q9UH92|MLX_HUMAN	MLX_HUMAN	MLX	3.62244	1.90327	0.692524	1.03737
sp|P49792|RBP2_HUMAN	RBP2_HUMAN	RANBP2	12.0021	3.46441	0.690724	2.68178
sp|Q12802|AKP13_HUMAN	AKP13_HUMAN	AKAP13	156.186	12.4974	0.690643	2.05609
sp|Q6P444|MTFR2_HUMAN	MTFR2_HUMAN	MTFR2	2.12401	1.4574	0.687545	1.36295
sp|Q8N5K1|CISD2_HUMAN	CISD2_HUMAN	CISD2	3.97271	1.99317	0.686126	1.68545
sp|Q96RT1|ERBIN_HUMAN	ERBIN_HUMAN	ERBIN	24.8701	4.98699	0.685103	0.895781
sp|Q14247|SRC8_HUMAN	SRC8_HUMAN	CTTN	4.82719	2.19709	0.683134	1.51555
sp|O75534|CSDE1_HUMAN	CSDE1_HUMAN	CSDE1	6.0345	2.45652	0.682162	2.23619
sp|P45880|VDAC2_HUMAN	VDAC2_HUMAN	VDAC2	0	0	0.680105	-1.99866
sp|Q04637|IF4G1_HUMAN	IF4G1_HUMAN	EIF4G1	9.70653	3.11553	0.67918	2.12171
sp|P30876|RPB2_HUMAN	RPB2_HUMAN	POLR2B	2.67849	1.63661	0.678684	-1.97606
sp|Q13442|HAP28_HUMAN	HAP28_HUMAN	PDAP1	7.61528	2.75958	0.675453	1.03011
sp|Q9Y2J2|E41L3_HUMAN	E41L3_HUMAN	EPB41L3	6.15743	2.48142	0.673306	1.86376
sp|O14976|GAK_HUMAN	GAK_HUMAN	GAK	8.20516	2.86447	0.672409	1.65327
sp|Q5HYI8|RABL3_HUMAN	RABL3_HUMAN	RABL3	3.70571	1.92502	0.672185	1.83622
sp|Q9UBF2|COPG2_HUMAN	COPG2_HUMAN	COPG2	1.93835	1.39225	0.669452	-1.76186
sp|Q96A33|CCD47_HUMAN	CCD47_HUMAN	CCDC47	4.8851	2.21023	0.669278	1.77802
sp|P50851|LRBA_HUMAN	LRBA_HUMAN	LRBA	8.6066	2.9337	0.669085	2.34198
sp|O14974|MYPT1_HUMAN	MYPT1_HUMAN	PPP1R12A	0	0	0.668981	0.558622
sp|Q07812|BAX_HUMAN	BAX_HUMAN	BAX	3.90831	1.97694	0.666592	1.87373
sp|Q9H6U6|BCAS3_HUMAN	BCAS3_HUMAN	BCAS3	3.93171	1.98285	0.666011	0.938097
sp|P82094|TMF1_HUMAN	TMF1_HUMAN	TMF1	10.2458	3.20091	0.662795	1.6711
sp|P27708|PYR1_HUMAN	PYR1_HUMAN	CAD	0.882755	0.93955	0.662553	-1.65616
sp|Q9NZN5|ARHGC_HUMAN	ARHGC_HUMAN	ARHGEF12	152.913	12.3658	0.659318	1.37949
sp|Q14684|RRP1B_HUMAN	RRP1B_HUMAN	RRP1B	5.5903	2.36438	0.658986	-0.884331
sp|Q6Y7W6|GGYF2_HUMAN	GGYF2_HUMAN	GIGYF2	7.08216	2.66123	0.658877	1.679
sp|O94826|TOM70_HUMAN	TOM70_HUMAN	TOMM70	4.07455	2.01855	0.657523	1.2958
sp|Q9UNZ5|L10K_HUMAN	L10K_HUMAN	C19orf53	0	0	0.656717	1.09678
sp|P62753|RS6_HUMAN	RS6_HUMAN	RPS6	4.68466	2.16441	0.654823	-0.615332
sp|Q92625|ANS1A_HUMAN	ANS1A_HUMAN	ANKS1A	0.927669	0.963156	0.654453	1.50045
sp|O95292|VAPB_HUMAN	VAPB_HUMAN	VAPB	3.38469	1.83975	0.653054	1.4248
sp|O15440|MRP5_HUMAN	MRP5_HUMAN	ABCC5	5.81305	2.41103	0.652206	1.47218
sp|P52306|GDS1_HUMAN	GDS1_HUMAN	RAP1GDS1	37.6232	6.13377	0.650972	2.87258
sp|Q15233|NONO_HUMAN	NONO_HUMAN	NONO	38.6607	6.21777	0.650186	1.80951
sp|Q58FF8|H90B2_HUMAN	H90B2_HUMAN	#N/A	#N/A	#N/A	0.649793	1.6225
sp|Q15648|MED1_HUMAN	MED1_HUMAN	MED1	1.79624	1.34024	0.647564	0.833297
sp|Q09666|AHNK_HUMAN	AHNK_HUMAN	AHNAK	15.6024	3.94998	0.647333	1.89818
sp|Q4KMP7|TB10B_HUMAN	TB10B_HUMAN	TBC1D10B	0.980539	0.990221	0.647248	-1.52655
sp|Q15005|SPCS2_HUMAN	SPCS2_HUMAN	SPCS2	1.36138	1.16678	0.646851	1.03986
sp|Q86SQ0|PHLB2_HUMAN	PHLB2_HUMAN	PHLDB2	1.53063	1.23719	0.646371	1.65442
sp|Q15643|TRIPB_HUMAN	TRIPB_HUMAN	TRIP11	9.54374	3.08929	0.644999	2.35516
sp|Q8WYP5|ELYS_HUMAN	ELYS_HUMAN	AHCTF1	1.93599	1.3914	0.644874	1.03785
sp|Q8IZJ1|UNC5B_HUMAN	UNC5B_HUMAN	UNC5B	6.00118	2.44973	0.638662	1.78938
sp|O43933|PEX1_HUMAN	PEX1_HUMAN	PEX1	4.99764	2.23554	0.636438	1.89363
sp|P43307|SSRA_HUMAN	SSRA_HUMAN	SSR1	2.98237	1.72695	0.636329	1.88213
sp|P62805|H4_HUMAN	H4_HUMAN	HIST1H4A	22.5015	4.74357	0.636033	1.66843
sp|P40616|ARL1_HUMAN	ARL1_HUMAN	ARL1	0	0	0.635147	-1.22243
sp|P49257|LMAN1_HUMAN	LMAN1_HUMAN	LMAN1	1.06907	1.03396	0.635107	-2.25641
sp|P43487|RANG_HUMAN	RANG_HUMAN	RANBP1	3.77979	1.94417	0.632067	1.99828
sp|P15924|DESP_HUMAN	DESP_HUMAN	DSP	11.1158	3.33403	0.631847	2.05173
sp|Q14157|UBP2L_HUMAN	UBP2L_HUMAN	UBAP2L	4.19981	2.04934	0.62984	1.88919
sp|Q9BSJ8|ESYT1_HUMAN	ESYT1_HUMAN	ESYT1	6.78003	2.60385	0.626527	1.8675
sp|O75821|EIF3G_HUMAN	EIF3G_HUMAN	EIF3G	0	0	0.62516	0.916809
sp|Q15758|AAAT_HUMAN	AAAT_HUMAN	SLC1A5	4.02808	2.00701	0.6239	1.13605
sp|Q9H2G2|SLK_HUMAN	SLK_HUMAN	SLK	7.19041	2.68149	0.623734	2.02916
sp|Q9NQC7|CYLD_HUMAN	CYLD_HUMAN	CYLD	0	0	0.622682	1.39388
sp|Q9H444|CHM4B_HUMAN	CHM4B_HUMAN	CHMP4B	0	0	0.621297	1.30089
sp|Q7Z7G8|VP13B_HUMAN	VP13B_HUMAN	VPS13B	17.4215	4.1739	0.620622	1.49909
sp|O14966|RAB7L_HUMAN	RAB7L_HUMAN	RAB29	3.46841	1.86237	0.620075	1.28229
sp|Q07157|ZO1_HUMAN	ZO1_HUMAN	TJP1	3.01847	1.73737	0.619825	1.10524
sp|Q99755|PI51A_HUMAN	PI51A_HUMAN	PIP5K1A	0	0	0.618472	-1.59804
sp|Q9Y3L5|RAP2C_HUMAN	RAP2C_HUMAN	RAP2C	0	0	0.615913	-1.33701
sp|P14209|CD99_HUMAN	CD99_HUMAN	CD99	0	0	0.609856	0.825101
sp|P25205|MCM3_HUMAN	MCM3_HUMAN	MCM3	0	0	0.607669	-1.38563
sp|Q7Z4H7|HAUS6_HUMAN	HAUS6_HUMAN	HAUS6	6.9063	2.62798	0.606535	2.42059
sp|O94906|PRP6_HUMAN	PRP6_HUMAN	PRPF6	0	0	0.604651	-1.92182
sp|Q9HCU5|PREB_HUMAN	PREB_HUMAN	PREB	3.80606	1.95091	0.604474	1.42609
sp|Q9BZF3|OSBL6_HUMAN	OSBL6_HUMAN	OSBPL6	3.50195	1.87135	0.603643	1.65398
sp|P46939|UTRO_HUMAN	UTRO_HUMAN	UTRN	9.64019	3.10487	0.6009	2.40964
sp|O43175|SERA_HUMAN	SERA_HUMAN	PHGDH	0.773591	0.87954	0.597709	-1.40519
sp|Q658Y4|F91A1_HUMAN	F91A1_HUMAN	FAM91A1	6.74517	2.59715	0.597086	1.85438
sp|Q8N0U8|VKORL_HUMAN	VKORL_HUMAN	VKORC1L1	0	0	0.595624	0.665948
sp|Q9H2H9|S38A1_HUMAN	S38A1_HUMAN	SLC38A1	5.30586	2.30345	0.594757	2.02989
sp|P07355|ANXA2_HUMAN;sp|A6NMY6|AXA2L_HUMAN	ANXA2_HUMAN	ANXA2	1.42907	1.19544	0.594502	-1.28369
sp|O95486|SC24A_HUMAN	SC24A_HUMAN	SEC24A	3.29234	1.81448	0.593325	0.777665
sp|Q9H3N1|TMX1_HUMAN	TMX1_HUMAN	TMX1	5.24576	2.29036	0.590923	1.93765
sp|O95757|HS74L_HUMAN	HS74L_HUMAN	HSPA4L	1.78516	1.3361	0.58734	-1.19784
sp|Q9NZZ3|CHMP5_HUMAN	CHMP5_HUMAN	CHMP5	0	0	0.587002	1.208
sp|Q14839|CHD4_HUMAN	CHD4_HUMAN	CHD4	4.89136	2.21164	0.584004	1.88452
sp|Q59GN2|R39L5_HUMAN;sp|P62891|RL39_HUMAN	R39L5_HUMAN	RPL39P5	0	0	0.582599	1.4593
sp|Q6P996|PDXD1_HUMAN	PDXD1_HUMAN	PDXDC1	4.15381	2.03809	0.574811	1.48664
sp|O60566|BUB1B_HUMAN	BUB1B_HUMAN	BUB1B	8.44321	2.90572	0.573674	1.62746
sp|P09884|DPOLA_HUMAN	DPOLA_HUMAN	POLA1	0	0	0.569595	0.612845
sp|Q8N2F6|ARM10_HUMAN	ARM10_HUMAN	ARMC10	3.48836	1.86772	0.569045	1.4658
sp|P48029|SC6A8_HUMAN	SC6A8_HUMAN	SLC6A8	1.25788	1.12155	0.568321	1.21455
sp|O43169|CYB5B_HUMAN	CYB5B_HUMAN	CYB5B	3.43756	1.85407	0.566841	1.62943
sp|Q8NC51|PAIRB_HUMAN	PAIRB_HUMAN	SERBP1	4.45328	2.11028	0.566189	1.63472
sp|Q6R327|RICTR_HUMAN	RICTR_HUMAN	RICTOR	1.68777	1.29914	0.564993	0.971787
sp|Q7Z2W4|ZCCHV_HUMAN	ZCCHV_HUMAN	ZC3HAV1	9.55883	3.09174	0.564632	1.38
sp|Q15334|L2GL1_HUMAN	L2GL1_HUMAN	LLGL1	0	0	0.563855	0.823411
sp|P49959|MRE11_HUMAN	MRE11_HUMAN	MRE11	5.52423	2.35037	0.563219	1.15609
sp|P05165|PCCA_HUMAN	PCCA_HUMAN	PCCA	6.61275	2.57153	0.562987	-2.35149
sp|Q7LBC6|KDM3B_HUMAN	KDM3B_HUMAN	KDM3B	3.6133	1.90087	0.562809	0.932384
sp|P49006|MRP_HUMAN	MRP_HUMAN	MARCKSL1	0	0	0.562605	0.925952
sp|Q5VTE0|EF1A3_HUMAN;sp|P68104|EF1A1_HUMAN	EF1A3_HUMAN	EEF1A1P5	0	0	0.56188	0.531517
sp|A1L0T0|ILVBL_HUMAN	ILVBL_HUMAN	ILVBL	0	0	0.55997	-0.429796
sp|O75381|PEX14_HUMAN	PEX14_HUMAN	PEX14	2.04637	1.43051	0.559495	-1.53253
sp|Q8NBN3|TM87A_HUMAN	TM87A_HUMAN	TMEM87A	8.03528	2.83466	0.554625	1.67323
sp|Q00341|VIGLN_HUMAN	VIGLN_HUMAN	HDLBP	7.86183	2.8039	0.553884	2.01064
sp|Q9H019|MFR1L_HUMAN	MFR1L_HUMAN	MTFR1L	2.78396	1.66852	0.550983	0.897874
sp|Q13325|IFIT5_HUMAN	IFIT5_HUMAN	IFIT5	5.63792	2.37443	0.548741	1.09463
sp|Q9UGI8|TES_HUMAN	TES_HUMAN	TES	3.43865	1.85436	0.545948	0.653657
sp|P81605|DCD_HUMAN	DCD_HUMAN	DCD	1.13844	1.06698	0.544694	-1.39965
sp|Q9UH62|ARMX3_HUMAN	ARMX3_HUMAN	ARMCX3	3.6452	1.90924	0.544038	1.80341
sp|P51957|NEK4_HUMAN	NEK4_HUMAN	NEK4	0	0	0.53949	0.674428
sp|P46776|RL27A_HUMAN	RL27A_HUMAN	RPL27A	3.39489	1.84252	0.538897	-0.614728
sp|Q9Y6I9|TX264_HUMAN	TX264_HUMAN	TEX264	1.40693	1.18614	0.537311	1.27521
sp|P07900|HS90A_HUMAN	HS90A_HUMAN	HSP90AA1	1.63299	1.27789	0.535306	-1.61276
sp|P13861|KAP2_HUMAN	KAP2_HUMAN	PRKAR2A	4.58811	2.14199	0.533219	1.46644
sp|P50402|EMD_HUMAN	EMD_HUMAN	EMD	3.1709	1.7807	0.533201	1.18471
sp|Q15032|R3HD1_HUMAN	R3HD1_HUMAN	R3HDM1	0	0	0.53246	0.58533
sp|P62750|RL23A_HUMAN	RL23A_HUMAN	RPL23A	4.83442	2.19873	0.530665	-0.540588
sp|Q9UEY8|ADDG_HUMAN	ADDG_HUMAN	ADD3	9.85638	3.13949	0.528245	1.28448
sp|Q9BTX1|NDC1_HUMAN	NDC1_HUMAN	NDC1	4.01102	2.00275	0.527552	1.79567
sp|O14795|UN13B_HUMAN	UN13B_HUMAN	UNC13B	9.87249	3.14205	0.526784	0.975461
sp|P26373|RL13_HUMAN	RL13_HUMAN	RPL13	2.91086	1.70612	0.526645	-0.638625
sp|Q9NVH0|EXD2_HUMAN	EXD2_HUMAN	EXD2	5.75337	2.39862	0.525831	0.658572
sp|O94806|KPCD3_HUMAN	KPCD3_HUMAN	PRKD3	12.7838	3.57545	0.524855	0.623171
sp|Q96RQ3|MCCA_HUMAN	MCCA_HUMAN	MCCC1	4.91589	2.21718	0.520011	-1.43691
sp|Q02790|FKBP4_HUMAN	FKBP4_HUMAN	FKBP4	0	0	0.51927	-1.16154
sp|Q14331|FRG1_HUMAN	FRG1_HUMAN	FRG1	0	0	0.517363	-1.32832
sp|Q14C86|GAPD1_HUMAN	GAPD1_HUMAN	GAPVD1	16.6177	4.07648	0.515108	2.05589
sp|P62266|RS23_HUMAN	RS23_HUMAN	RPS23	5.71489	2.39058	0.513213	0.647079
sp|O95817|BAG3_HUMAN	BAG3_HUMAN	BAG3	3.4771	1.8647	0.513135	0.680326
sp|Q15366|PCBP2_HUMAN	PCBP2_HUMAN	PCBP2	2.79824	1.67279	0.511628	0.929616
sp|O43491|E41L2_HUMAN	E41L2_HUMAN	EPB41L2	6.89595	2.62601	0.509694	1.34435
sp|Q02878|RL6_HUMAN	RL6_HUMAN	RPL6	0	0	0.509688	-1.47253
sp|P83881|RL36A_HUMAN	RL36A_HUMAN	RPL36A	7.78674	2.79047	0.508199	0.557749
sp|Q13085|ACACA_HUMAN	ACACA_HUMAN	ACACA	20.7276	4.55275	0.504856	-0.725522
sp|O14617|AP3D1_HUMAN	AP3D1_HUMAN	AP3D1	4.71642	2.17173	0.504115	-0.628675
sp|P50416|CPT1A_HUMAN	CPT1A_HUMAN	CPT1A	4.0806	2.02005	0.503155	1.35771
sp|P62913|RL11_HUMAN	RL11_HUMAN	RPL11	2.38026	1.54281	0.499186	-0.87841
sp|Q92598|HS105_HUMAN	HS105_HUMAN	HSPH1	5.35332	2.31372	0.498932	1.98092
sp|P04406|G3P_HUMAN	G3P_HUMAN	GAPDH	1.09543	1.04663	0.497716	-1.40392
sp|Q7Z3U7|MON2_HUMAN	MON2_HUMAN	MON2	0	0	0.494641	-0.582463
sp|O75369|FLNB_HUMAN	FLNB_HUMAN	FLNB	8.28396	2.87819	0.493526	1.41789
sp|Q8TEQ6|GEMI5_HUMAN	GEMI5_HUMAN	GEMIN5	16.6216	4.07696	0.491916	1.79458
sp|P50502|F10A1_HUMAN;sp|Q8NFI4|F10A5_HUMAN;sp|Q8IZP2|ST134_HUMAN	F10A1_HUMAN	ST13	1.17706	1.08492	0.491497	-1.32169
sp|Q9UHB9|SRP68_HUMAN	SRP68_HUMAN	SRP68	16.1337	4.01667	0.491045	1.53434
sp|P25789|PSA4_HUMAN	PSA4_HUMAN	PSMA4	5.47854	2.34063	0.490129	0.686489
sp|P61081|UBC12_HUMAN	UBC12_HUMAN	UBE2M	3.47284	1.86356	0.488759	1.12769
sp|Q9UBM7|DHCR7_HUMAN	DHCR7_HUMAN	DHCR7	2.91255	1.70662	0.488654	1.35496
sp|Q6GYQ0|RGPA1_HUMAN	RGPA1_HUMAN	RALGAPA1	1.46674	1.21109	0.486858	0.918595
sp|Q9NQC3|RTN4_HUMAN	RTN4_HUMAN	RTN4	7.28205	2.69853	0.486323	1.66533
sp|P11171|41_HUMAN	41_HUMAN	EPB41	7.44584	2.72871	0.482395	1.52326
sp|Q9NU22|MDN1_HUMAN	MDN1_HUMAN	MDN1	12.3359	3.51225	0.479248	1.72845
sp|P49454|CENPF_HUMAN	CENPF_HUMAN	CENPF	2.4941	1.57927	0.478989	1.30723
sp|O75400|PR40A_HUMAN	PR40A_HUMAN	PRPF40A	1.7498	1.3228	0.478728	-1.46196
sp|Q9BQ48|RM34_HUMAN	RM34_HUMAN	MRPL34	7.11748	2.66786	0.474204	1.26425
sp|O15294|OGT1_HUMAN	OGT1_HUMAN	OGT	1.37078	1.1708	0.472213	1.10954
sp|P10412|H14_HUMAN	H14_HUMAN	HIST1H1E	16.7494	4.09261	0.470043	-0.821426
sp|Q7KZF4|SND1_HUMAN	SND1_HUMAN	SND1	5.75005	2.39793	0.469344	1.48759
sp|O95721|SNP29_HUMAN	SNP29_HUMAN	SNAP29	4.22062	2.05441	0.468808	1.15289
sp|O60763|USO1_HUMAN	USO1_HUMAN	USO1	1.55362	1.24644	0.468332	0.80628
sp|Q5VWQ8|DAB2P_HUMAN	DAB2P_HUMAN	DAB2IP	0	0	0.467767	0.499751
sp|O00483|NDUA4_HUMAN	NDUA4_HUMAN	NDUFA4	1.07902	1.03876	0.46731	-1.11679
sp|Q99707|METH_HUMAN	METH_HUMAN	MTR	1.19243	1.09199	0.464941	-1.84902
sp|P07195|LDHB_HUMAN	LDHB_HUMAN	LDHB	0	0	0.464237	1.10466
sp|O14641|DVL2_HUMAN	DVL2_HUMAN	DVL2	4.8524	2.20282	0.463937	1.05132
sp|Q92692|NECT2_HUMAN	NECT2_HUMAN	NECTIN2	0	0	0.463891	0.754124
sp|Q6WKZ4|RFIP1_HUMAN	RFIP1_HUMAN	RAB11FIP1	4.02637	2.00658	0.463691	-1.33344
sp|P53804|TTC3_HUMAN	TTC3_HUMAN	TTC3	0	0	0.463655	-1.38291
sp|O60231|DHX16_HUMAN	DHX16_HUMAN	DHX16	0	0	0.46265	0.791297
sp|P47712|PA24A_HUMAN	PA24A_HUMAN	PLA2G4A	2.40877	1.55202	0.461247	1.07828
sp|Q06830|PRDX1_HUMAN	PRDX1_HUMAN	PRDX1	3.05262	1.74718	0.459646	0.61109
sp|Q9Y2R4|DDX52_HUMAN	DDX52_HUMAN	DDX52	1.13076	1.06337	0.456052	-0.99468
sp|P30101|PDIA3_HUMAN	PDIA3_HUMAN	PDIA3	0	0	0.456032	-0.55489
sp|Q9UKJ3|GPTC8_HUMAN	GPTC8_HUMAN	GPATCH8	0	0	0.454955	-0.646931
sp|Q86W92|LIPB1_HUMAN	LIPB1_HUMAN	PPFIBP1	4.96039	2.22719	0.454905	0.798953
sp|P55010|IF5_HUMAN	IF5_HUMAN	EIF5	3.95527	1.98879	0.454276	1.24288
sp|Q9P0L0|VAPA_HUMAN	VAPA_HUMAN	VAPA	4.36156	2.08843	0.452597	1.29534
sp|Q9NZC7|WWOX_HUMAN	WWOX_HUMAN	WWOX	3.78806	1.94629	0.452499	1.06826
sp|Q9Y2W6|TDRKH_HUMAN	TDRKH_HUMAN	TDRKH	5.11282	2.26115	0.452315	0.614452
sp|P11717|MPRI_HUMAN	MPRI_HUMAN	IGF2R	5.78386	2.40497	0.449512	1.46914
sp|Q8IVF7|FMNL3_HUMAN	FMNL3_HUMAN	FMNL3	3.65464	1.91171	0.449374	1.50255
sp|Q02487|DSC2_HUMAN	DSC2_HUMAN	DSC2	1.7562	1.32522	0.448734	0.794504
sp|Q53GQ0|DHB12_HUMAN	DHB12_HUMAN	HSD17B12	0	0	0.44783	0.54817
sp|P06733|ENOA_HUMAN	ENOA_HUMAN	ENO1	3.31007	1.81936	0.445857	1.18631
sp|Q99442|SEC62_HUMAN	SEC62_HUMAN	SEC62	0	0	0.439874	-1.60069
sp|Q9Y217|MTMR6_HUMAN	MTMR6_HUMAN	MTMR6	12.8025	3.57805	0.439471	0.742368
sp|Q7Z434|MAVS_HUMAN	MAVS_HUMAN	MAVS	6.47952	2.54549	0.438803	0.614265
sp|Q8WXH0|SYNE2_HUMAN	SYNE2_HUMAN	SYNE2	8.98696	2.99783	0.437089	2.05856
sp|Q96RG2|PASK_HUMAN	PASK_HUMAN	PASK	0	0	0.435221	-0.889409
sp|Q8N6R0|MET13_HUMAN	MET13_HUMAN	METTL13	1.08449	1.04139	0.434867	-0.829352
sp|Q5THJ4|VP13D_HUMAN	VP13D_HUMAN	VPS13D	9.45895	3.07554	0.433824	1.91039
sp|P51809|VAMP7_HUMAN	VAMP7_HUMAN	VAMP7	2.59845	1.61197	0.433093	-0.686136
sp|Q16630|CPSF6_HUMAN	CPSF6_HUMAN	CPSF6	8.35316	2.89018	0.432847	0.524828
sp|Q9UBC2|EP15R_HUMAN	EP15R_HUMAN	EPS15L1	4.89001	2.21134	0.429121	1.24296
sp|Q14139|UBE4A_HUMAN	UBE4A_HUMAN	UBE4A	1.24594	1.11622	0.42732	1.09094
sp|O14640|DVL1_HUMAN;sp|P54792|DVLP1_HUMAN	DVL1_HUMAN	DVL1	4.5356	2.1297	0.424894	1.03997
sp|Q9Y3F4|STRAP_HUMAN	STRAP_HUMAN	STRAP	2.71269	1.64702	0.42486	0.852363
sp|Q9HB71|CYBP_HUMAN	CYBP_HUMAN	CACYBP	4.38872	2.09493	0.422038	1.269
sp|Q8WUX9|CHMP7_HUMAN	CHMP7_HUMAN	CHMP7	5.90985	2.43102	0.420946	0.885113
sp|Q15907|RB11B_HUMAN	RB11B_HUMAN	RAB11B	0	0	0.419936	1.80902
sp|O14981|BTAF1_HUMAN	BTAF1_HUMAN	BTAF1	3.15234	1.77548	0.419627	0.741701
sp|Q13283|G3BP1_HUMAN	G3BP1_HUMAN	G3BP1	0	0	0.419557	0.73602
sp|Q9NW68|BSDC1_HUMAN	BSDC1_HUMAN	BSDC1	2.5245	1.58887	0.415074	0.440856
sp|P19338|NUCL_HUMAN	NUCL_HUMAN	NCL	3.69392	1.92196	0.414957	1.37472
sp|P32119|PRDX2_HUMAN	PRDX2_HUMAN	PRDX2	0	0	0.414007	-0.528718
sp|Q9BXK5|B2L13_HUMAN	B2L13_HUMAN	BCL2L13	5.38211	2.31994	0.413279	0.787774
sp|Q5HYI7|MTX3_HUMAN	MTX3_HUMAN	MTX3	3.93974	1.98488	0.411812	1.10183
sp|Q9UHN6|TMEM2_HUMAN	TMEM2_HUMAN	CEMIP2	3.08685	1.75694	0.409849	0.523351
sp|Q8N5G2|MACOI_HUMAN	MACOI_HUMAN	MACO1	0	0	0.409187	1.02078
sp|Q9Y2Z0|SGT1_HUMAN	SGT1_HUMAN	SUGT1	4.35833	2.08766	0.408233	1.12892
sp|Q86UE4|LYRIC_HUMAN	LYRIC_HUMAN	MTDH	3.61018	1.90005	0.405988	1.15938
sp|P62273|RS29_HUMAN	RS29_HUMAN	RPS29	2.33656	1.52858	0.405902	-1.57253
sp|Q9UPU7|TBD2B_HUMAN	TBD2B_HUMAN	TBC1D2B	0.8892	0.942974	0.404491	-0.826722
sp|Q07065|CKAP4_HUMAN	CKAP4_HUMAN	CKAP4	4.19627	2.04848	0.40286	-0.867242
sp|Q8WXG6|MADD_HUMAN	MADD_HUMAN	#N/A	#N/A	#N/A	0.402004	-0.492262
sp|Q9GZZ1|NAA50_HUMAN	NAA50_HUMAN	NAA50	0	0	0.401943	0.487379
sp|Q93045|STMN2_HUMAN	STMN2_HUMAN	STMN2	0	0	0.401517	0.976991
sp|Q9NTJ3|SMC4_HUMAN	SMC4_HUMAN	SMC4	3.45572	1.85896	0.398921	-1.62249
sp|Q63HN8|RN213_HUMAN	RN213_HUMAN	RNF213	10.194	3.19281	0.398493	1.01193
sp|P48444|COPD_HUMAN	COPD_HUMAN	ARCN1	14.0213	3.7445	0.39848	1.0807
sp|O00161|SNP23_HUMAN	SNP23_HUMAN	SNAP23	0	0	0.397363	0.714018
sp|P35579|MYH9_HUMAN	MYH9_HUMAN	MYH9	7.58743	2.75453	0.392996	1.30491
sp|P07305|H10_HUMAN	H10_HUMAN	H1F0	2.83681	1.68428	0.391396	-1.31424
sp|Q9UHR5|S30BP_HUMAN	S30BP_HUMAN	SAP30BP	0	0	0.390844	0.735049
sp|P42167|LAP2B_HUMAN	LAP2B_HUMAN	TMPO	5.73472	2.39473	0.388105	0.64648
sp|Q9HAV4|XPO5_HUMAN	XPO5_HUMAN	XPO5	0	0	0.386875	0.402679
sp|Q86YS7|C2CD5_HUMAN	C2CD5_HUMAN	C2CD5	4.26304	2.06471	0.386386	1.11397
sp|O95819|M4K4_HUMAN	M4K4_HUMAN	MAP4K4	0.855769	0.925078	0.385949	1.24846
sp|P06748|NPM_HUMAN	NPM_HUMAN	NPM1	5.01288	2.23895	0.385306	1.1377
sp|Q9H3U1|UN45A_HUMAN	UN45A_HUMAN	UNC45A	2.25796	1.50265	0.384583	-1.50587
sp|Q14318|FKBP8_HUMAN	FKBP8_HUMAN	FKBP8	3.6096	1.89989	0.384	0.763331
sp|Q8TEV9|SMCR8_HUMAN	SMCR8_HUMAN	SMCR8	4.44737	2.10888	0.383916	1.5084
sp|Q9ULH7|MKL2_HUMAN	MKL2_HUMAN	MRTFB	4.73043	2.17496	0.382857	1.2679
sp|Q9BSD7|NTPCR_HUMAN	NTPCR_HUMAN	NTPCR	0	0	0.382754	0.754973
sp|P83731|RL24_HUMAN	RL24_HUMAN	RPL24	4.4985	2.12097	0.381773	-0.438819
sp|P06737|PYGL_HUMAN	PYGL_HUMAN	PYGL	0	0	0.381177	0.518594
sp|P84157|MXRA7_HUMAN	MXRA7_HUMAN	MXRA7	0	0	0.380808	0.801829
sp|P21397|AOFA_HUMAN	AOFA_HUMAN	MAOA	9.53844	3.08844	0.380646	1.96998
sp|Q8IZA0|K319L_HUMAN	K319L_HUMAN	KIAA0319L	1.2755	1.12938	0.380642	0.89918
sp|Q6PKG0|LARP1_HUMAN	LARP1_HUMAN	LARP1	4.52987	2.12835	0.378249	1.47946
sp|Q8TAA9|VANG1_HUMAN	VANG1_HUMAN	VANGL1	0	0	0.376419	0.969577
sp|Q5T8D3|ACBD5_HUMAN	ACBD5_HUMAN	ACBD5	2.2791	1.50967	0.373478	1.09528
sp|Q13263|TIF1B_HUMAN	TIF1B_HUMAN	TRIM28	0	0	0.3728	-0.822496
sp|Q969Q0|RL36L_HUMAN	RL36L_HUMAN	RPL36AL	2.5779	1.60558	0.369838	1.21035
sp|Q9UNF1|MAGD2_HUMAN	MAGD2_HUMAN	MAGED2	1.6762	1.29468	0.369288	-0.977723
sp|Q8IY17|PLPL6_HUMAN	PLPL6_HUMAN	PNPLA6	4.68412	2.16428	0.369126	1.37226
sp|Q9NZ01|TECR_HUMAN	TECR_HUMAN	TECR	8.13534	2.85225	0.367776	1.2737
sp|Q9NVP1|DDX18_HUMAN	DDX18_HUMAN	DDX18	0.80016	0.894517	0.364349	-1.35564
sp|P51648|AL3A2_HUMAN	AL3A2_HUMAN	ALDH3A2	4.16067	2.03977	0.361813	-0.342707
sp|Q9BPX3|CND3_HUMAN	CND3_HUMAN	NCAPG	2.25155	1.50052	0.359256	0.599397
sp|Q86YQ8|CPNE8_HUMAN	CPNE8_HUMAN	CPNE8	0	0	0.357806	0.424139
sp|Q9NTK5|OLA1_HUMAN	OLA1_HUMAN	OLA1	0	0	0.356052	-0.480203
sp|Q02952|AKA12_HUMAN	AKA12_HUMAN	AKAP12	4.48137	2.11692	0.355398	1.36389
sp|O75152|ZC11A_HUMAN	ZC11A_HUMAN	ZC3H11A	1.71668	1.31022	0.355373	1.03718
sp|Q9UPN3|MACF1_HUMAN	MACF1_HUMAN	MACF1	12.393	3.52037	0.354763	1.39027
sp|Q15398|DLGP5_HUMAN	DLGP5_HUMAN	DLGAP5	1.48006	1.21658	0.353075	0.753881
sp|O95793|STAU1_HUMAN	STAU1_HUMAN	STAU1	0	0	0.352076	0.657811
sp|Q4KWH8|PLCH1_HUMAN	PLCH1_HUMAN	PLCH1	0	0	0.346487	0.533893
sp|P14923|PLAK_HUMAN	PLAK_HUMAN	JUP	0	0	0.341585	0.789357
sp|Q9Y2H6|FND3A_HUMAN	FND3A_HUMAN	FNDC3A	3.80682	1.95111	0.3411	1.25545
sp|Q8IWX8|CHERP_HUMAN	CHERP_HUMAN	CHERP	12.3087	3.50838	0.341098	0.826663
sp|P27824|CALX_HUMAN	CALX_HUMAN	CANX	1.25749	1.12138	0.339197	-1.11775
sp|P62249|RS16_HUMAN	RS16_HUMAN	RPS16	4.49456	2.12004	0.335654	-0.411764
sp|Q9BZF9|UACA_HUMAN	UACA_HUMAN	UACA	2.85962	1.69104	0.334674	-1.07489
sp|Q9UNX3|RL26L_HUMAN	RL26L_HUMAN	RPL26L1	9.06108	3.01016	0.334419	1.1295
sp|Q9NRY5|F1142_HUMAN	F1142_HUMAN	FAM114A2	35.8581	5.98816	0.33367	1.01701
sp|P12270|TPR_HUMAN	TPR_HUMAN	TPR	10.5571	3.24917	0.332422	0.943362
sp|Q5TAX3|TUT4_HUMAN	TUT4_HUMAN	TUT4	0	0	0.331478	0.920586
sp|Q8NEN9|PDZD8_HUMAN	PDZD8_HUMAN	PDZD8	7.71311	2.77725	0.330448	1.1956
sp|P32780|TF2H1_HUMAN	TF2H1_HUMAN	GTF2H1	0	0	0.330431	-0.632152
sp|O14654|IRS4_HUMAN	IRS4_HUMAN	IRS4	9.36391	3.06005	0.329304	1.47263
sp|Q05823|RN5A_HUMAN	RN5A_HUMAN	RNASEL	1.18071	1.0866	0.32861	0.654719
sp|P41440|S19A1_HUMAN	S19A1_HUMAN	SLC19A1	1.00212	1.00106	0.327414	-1.03088
sp|Q9Y266|NUDC_HUMAN	NUDC_HUMAN	NUDC	4.29064	2.07139	0.326769	0.623242
sp|Q16850|CP51A_HUMAN	CP51A_HUMAN	CYP51A1	0	0	0.32453	-0.466789
sp|Q641Q2|WAC2A_HUMAN;sp|Q9Y4E1|WAC2C_HUMAN	WAC2A_HUMAN	WASHC2A	0	0	0.323729	-0.718879
sp|Q14315|FLNC_HUMAN	FLNC_HUMAN	FLNC	0	0	0.321186	1.09391
sp|P21127|CD11B_HUMAN;sp|Q9UQ88|CD11A_HUMAN	CD11B_HUMAN	CDK11B	0	0	0.320715	-0.76346
sp|Q9Y450|HBS1L_HUMAN	HBS1L_HUMAN	HBS1L	0.799701	0.89426	0.320146	-0.906988
sp|P50747|BPL1_HUMAN	BPL1_HUMAN	HLCS	6.07434	2.46462	0.318352	0.93781
sp|Q562F6|SGO2_HUMAN	SGO2_HUMAN	SGO2	0.965863	0.982783	0.316831	-1.23829
sp|Q14185|DOCK1_HUMAN	DOCK1_HUMAN	DOCK1	0	0	0.315932	-1.04472
sp|P22314|UBA1_HUMAN	UBA1_HUMAN	UBA1	0	0	0.315159	0.590594
sp|P78310|CXAR_HUMAN	CXAR_HUMAN	CXADR	0	0	0.31434	-0.731315
sp|P12236|ADT3_HUMAN	ADT3_HUMAN	SLC25A6	8.16321	2.85713	0.312232	0.804055
sp|P06576|ATPB_HUMAN	ATPB_HUMAN	ATP5F1B	3.34379	1.8286	0.311304	-0.73984
sp|Q9Y5M8|SRPRB_HUMAN	SRPRB_HUMAN	SRPRB	1.01082	1.00539	0.310301	-1.13738
sp|Q8NE71|ABCF1_HUMAN	ABCF1_HUMAN	ABCF1	3.25638	1.80455	0.310288	-0.75032
sp|Q9BZE4|NOG1_HUMAN	NOG1_HUMAN	GTPBP4	1.2706	1.12721	0.309568	-1.12531
sp|Q9UJF2|NGAP_HUMAN	NGAP_HUMAN	RASAL2	4.2434	2.05995	0.309172	1.11482
sp|Q8WY36|BBX_HUMAN	BBX_HUMAN	BBX	1.97169	1.40417	0.309162	-1.10346
sp|P35658|NU214_HUMAN	NU214_HUMAN	NUP214	7.22889	2.68866	0.306909	0.865646
sp|Q15388|TOM20_HUMAN	TOM20_HUMAN	TOMM20	1.03644	1.01806	0.306764	-0.952772
sp|P52732|KIF11_HUMAN	KIF11_HUMAN	KIF11	0	0	0.305819	-0.825182
sp|Q14126|DSG2_HUMAN	DSG2_HUMAN	DSG2	1.35785	1.16527	0.305145	-0.920923
sp|Q92522|H1X_HUMAN	H1X_HUMAN	H1FX	1.28259	1.13251	0.303457	-1.01779
sp|P08243|ASNS_HUMAN	ASNS_HUMAN	ASNS	0	0	0.302017	-0.501636
sp|P56182|RRP1_HUMAN	RRP1_HUMAN	RRP1	2.59737	1.61164	0.295927	-0.876999
sp|Q2TBE0|C19L2_HUMAN	C19L2_HUMAN	CWF19L2	0	0	0.294914	-0.437443
sp|P42356|PI4KA_HUMAN	PI4KA_HUMAN	PI4KA	1.43279	1.19699	0.294743	0.535775
sp|Q8N9N7|LRC57_HUMAN	LRC57_HUMAN	LRRC57	8.59215	2.93124	0.294479	0.660589
sp|Q9BXS9|S26A6_HUMAN	S26A6_HUMAN	SLC26A6	0	0	0.294118	0.679592
sp|P29966|MARCS_HUMAN	MARCS_HUMAN	MARCKS	1.34738	1.16077	0.293166	-0.78039
sp|Q8TCG1|CIP2A_HUMAN	CIP2A_HUMAN	CIP2A	5.13735	2.26657	0.293032	0.955053
sp|P52701|MSH6_HUMAN	MSH6_HUMAN	MSH6	4.16608	2.0411	0.292802	0.947676
sp|O43399|TPD54_HUMAN	TPD54_HUMAN	TPD52L2	3.38465	1.83974	0.292744	0.48515
sp|Q9NWB6|ARGL1_HUMAN	ARGL1_HUMAN	ARGLU1	1.2662	1.12525	0.290621	-1.04987
sp|P62829|RL23_HUMAN	RL23_HUMAN	RPL23	5.05294	2.24787	0.290027	-0.342718
sp|P60842|IF4A1_HUMAN	IF4A1_HUMAN	EIF4A1	1.30769	1.14354	0.28654	0.868121
sp|P26641|EF1G_HUMAN	EF1G_HUMAN	EEF1G	0	0	0.285856	-0.519289
sp|O94822|LTN1_HUMAN	LTN1_HUMAN	LTN1	1.31233	1.14557	0.285185	0.806753
sp|Q01968|OCRL_HUMAN	OCRL_HUMAN	OCRL	2.99431	1.73041	0.284072	0.989502
sp|Q9UKY7|CDV3_HUMAN	CDV3_HUMAN	CDV3	0	0	0.283157	0.47375
sp|Q5C9Z4|NOM1_HUMAN	NOM1_HUMAN	NOM1	3.90671	1.97654	0.282041	-0.701356
sp|Q92889|XPF_HUMAN	XPF_HUMAN	ERCC4	0	0	0.281887	0.88642
sp|O15027|SC16A_HUMAN	SC16A_HUMAN	SEC16A	1.93469	1.39093	0.281482	0.845769
sp|P57772|SELB_HUMAN	SELB_HUMAN	EEFSEC	0	0	0.281313	-0.927916
sp|P21333|FLNA_HUMAN	FLNA_HUMAN	FLNA	17.4105	4.17259	0.277031	0.757027
sp|Q9Y5X1|SNX9_HUMAN	SNX9_HUMAN	SNX9	1.16598	1.0798	0.274894	-0.876486
sp|E9PAV3|NACAM_HUMAN;sp|Q13765|NACA_HUMAN	NACAM_HUMAN	NACA	8.53921	2.92219	0.27279	0.980866
sp|P62899|RL31_HUMAN	RL31_HUMAN	RPL31	0	0	0.271015	0.51516
sp|P62854|RS26_HUMAN;sp|Q5JNZ5|RS26L_HUMAN	RS26_HUMAN	RPS26	2.95335	1.71853	0.270503	-0.347941
sp|P29320|EPHA3_HUMAN	EPHA3_HUMAN	EPHA3	0	0	0.269934	0.51118
sp|Q04721|NOTC2_HUMAN	NOTC2_HUMAN	NOTCH2	4.11889	2.02951	0.269723	0.876209
sp|Q16181|SEPT7_HUMAN	SEPT7_HUMAN	SEPTIN7	3.61381	1.901	0.269364	0.341329
sp|Q6PIW4|FIGL1_HUMAN;sp|Q9UN37|VPS4A_HUMAN;sp|O75351|VPS4B_HUMAN	FIGL1_HUMAN	FIGNL1	0	0	0.269343	0.316132
sp|P05141|ADT2_HUMAN	ADT2_HUMAN	SLC25A5	4.63769	2.15353	0.268628	0.34318
sp|Q01650|LAT1_HUMAN	LAT1_HUMAN	SLC7A5	4.26817	2.06596	0.268574	0.901841
sp|Q8N2A8|PLD6_HUMAN	PLD6_HUMAN	PLD6	1.85867	1.36333	0.267468	0.654032
sp|Q9UQN3|CHM2B_HUMAN	CHM2B_HUMAN	CHMP2B	4.40248	2.09821	0.267201	0.821287
sp|Q96P70|IPO9_HUMAN	IPO9_HUMAN	IPO9	2.69682	1.6422	0.26668	-0.563771
sp|Q99614|TTC1_HUMAN	TTC1_HUMAN	TTC1	1.63145	1.27728	0.264617	-0.73409
sp|P30837|AL1B1_HUMAN	AL1B1_HUMAN	ALDH1B1	0	0	0.264306	-0.371394
sp|Q07020|RL18_HUMAN	RL18_HUMAN	RPL18	1.15431	1.07439	0.262176	-0.817018
sp|P52789|HXK2_HUMAN	HXK2_HUMAN	HK2	4.16598	2.04107	0.261733	-1.06559
sp|Q969Z3|MARC2_HUMAN	MARC2_HUMAN	MARC2	4.08646	2.0215	0.260932	0.582926
sp|Q14789|GOGB1_HUMAN	GOGB1_HUMAN	GOLGB1	13.5806	3.68518	0.259658	1.11238
sp|P62847|RS24_HUMAN	RS24_HUMAN	RPS24	3.81257	1.95258	0.259222	0.418088
sp|O60271|JIP4_HUMAN	JIP4_HUMAN	SPAG9	1.46115	1.20878	0.257176	-0.825351
sp|P62851|RS25_HUMAN	RS25_HUMAN	RPS25	2.6453	1.62644	0.257102	-0.578902
sp|O95248|MTMR5_HUMAN	MTMR5_HUMAN	SBF1	0	0	0.256283	-0.999409
sp|P62244|RS15A_HUMAN	RS15A_HUMAN	RPS15A	3.45154	1.85783	0.256035	-0.866167
sp|Q8IXI1|MIRO2_HUMAN	MIRO2_HUMAN	RHOT2	2.07643	1.44098	0.254763	0.77746
sp|P29317|EPHA2_HUMAN	EPHA2_HUMAN	EPHA2	3.36834	1.8353	0.253307	0.363216
sp|Q96KP1|EXOC2_HUMAN	EXOC2_HUMAN	EXOC2	1.48999	1.22065	0.251546	-0.660127
sp|Q12959|DLG1_HUMAN	DLG1_HUMAN	DLG1	1.55456	1.24682	0.250816	0.664934
sp|Q8TDD1|DDX54_HUMAN	DDX54_HUMAN	DDX54	2.06974	1.43866	0.250545	-1.16952
sp|Q9P032|NDUF4_HUMAN	NDUF4_HUMAN	NDUFAF4	0	0	0.250237	0.646871
sp|Q08379|GOGA2_HUMAN	GOGA2_HUMAN	GOLGA2	2.5252	1.58909	0.249051	-0.750055
sp|P40227|TCPZ_HUMAN	TCPZ_HUMAN	CCT6A	2.088	1.44499	0.248237	-0.624923
sp|Q9Y394|DHRS7_HUMAN	DHRS7_HUMAN	DHRS7	5.87001	2.42281	0.247927	0.754131
sp|Q9H2M9|RBGPR_HUMAN	RBGPR_HUMAN	RAB3GAP2	6.98567	2.64304	0.247663	0.986912
sp|Q9Y6K0|CEPT1_HUMAN	CEPT1_HUMAN	CEPT1	0	0	0.247147	-0.538843
sp|P53618|COPB_HUMAN	COPB_HUMAN	COPB1	1.50381	1.2263	0.24543	-0.502498
sp|Q5TC12|ATPF1_HUMAN	ATPF1_HUMAN	ATPAF1	3.24899	1.8025	0.24487	0.750228
sp|P62701|RS4X_HUMAN	RS4X_HUMAN	RPS4X	3.20031	1.78894	0.243733	-0.413777
sp|Q8NEY1|NAV1_HUMAN	NAV1_HUMAN	NAV1	0	0	0.243315	0.535128
sp|P18564|ITB6_HUMAN	ITB6_HUMAN	ITGB6	0	0	0.243172	0.7707
sp|Q96HY6|DDRGK_HUMAN	DDRGK_HUMAN	DDRGK1	0	0	0.24148	-0.63173
sp|Q12923|PTN13_HUMAN	PTN13_HUMAN	PTPN13	7.26132	2.69468	0.240896	0.933472
sp|A6NKT7|RGPD3_HUMAN	RGPD3_HUMAN	#N/A	#N/A	#N/A	0.240467	0.704394
sp|O75691|UTP20_HUMAN	UTP20_HUMAN	UTP20	7.54716	2.74721	0.240131	0.865379
sp|O14828|SCAM3_HUMAN	SCAM3_HUMAN	SCAMP3	0	0	0.238494	0.499311
sp|P30519|HMOX2_HUMAN	HMOX2_HUMAN	HMOX2	1.43099	1.19624	0.238323	0.721804
sp|Q16543|CDC37_HUMAN	CDC37_HUMAN	CDC37	2.46785	1.57094	0.236715	0.513474
sp|Q99996|AKAP9_HUMAN	AKAP9_HUMAN	AKAP9	11.3955	3.37572	0.235582	-1.09415
sp|Q9P2D1|CHD7_HUMAN	CHD7_HUMAN	CHD7	0	0	0.234959	0.345634
sp|P38646|GRP75_HUMAN	GRP75_HUMAN	HSPA9	1.48349	1.21799	0.234874	-0.885949
sp|Q9BWH2|FUND2_HUMAN	FUND2_HUMAN	FUNDC2	3.47934	1.8653	0.234364	0.486548
sp|Q5UIP0|RIF1_HUMAN	RIF1_HUMAN	RIF1	0	0	0.2322	-0.490714
sp|P05556|ITB1_HUMAN	ITB1_HUMAN	ITGB1	3.79537	1.94817	0.230404	0.88357
sp|O95210|STBD1_HUMAN	STBD1_HUMAN	STBD1	0	0	0.229306	0.55643
sp|P09651|ROA1_HUMAN;sp|Q32P51|RA1L2_HUMAN	ROA1_HUMAN	HNRNPA1	1.83798	1.35572	0.229065	0.448475
sp|O75915|PRAF3_HUMAN	PRAF3_HUMAN	ARL6IP5	10.7404	3.27726	0.226893	0.641298
sp|P63244|RACK1_HUMAN	RACK1_HUMAN	RACK1	0.970305	0.985041	0.225307	-0.768174
sp|O95163|ELP1_HUMAN	ELP1_HUMAN	ELP1	0	0	0.224624	0.576075
sp|Q9UG63|ABCF2_HUMAN	ABCF2_HUMAN	ABCF2	3.49314	1.86899	0.224503	0.769704
sp|Q92878|RAD50_HUMAN	RAD50_HUMAN	RAD50	3.5665	1.88852	0.222583	0.832671
sp|Q96A65|EXOC4_HUMAN	EXOC4_HUMAN	EXOC4	5.9059	2.43021	0.221597	0.707222
sp|Q9BQG0|MBB1A_HUMAN	MBB1A_HUMAN	MYBBP1A	7.69265	2.77356	0.219831	-0.330617
sp|O75592|MYCB2_HUMAN	MYCB2_HUMAN	MYCBP2	8.75799	2.95939	0.217844	-0.903539
sp|P46779|RL28_HUMAN	RL28_HUMAN	RPL28	3.57538	1.89087	0.21731	-0.359156
sp|P22102|PUR2_HUMAN	PUR2_HUMAN	GART	1.65012	1.28457	0.215314	0.555524
sp|Q02040|AK17A_HUMAN	AK17A_HUMAN	AKAP17A	1.17156	1.08239	0.214983	-0.834174
sp|P30041|PRDX6_HUMAN	PRDX6_HUMAN	PRDX6	4.93139	2.22067	0.211244	0.365889
sp|Q15365|PCBP1_HUMAN	PCBP1_HUMAN	PCBP1	2.78278	1.66817	0.208796	0.309109
sp|P19367|HXK1_HUMAN	HXK1_HUMAN	HK1	11.1859	3.34453	0.208051	0.659759
sp|O96011|PX11B_HUMAN	PX11B_HUMAN	PEX11B	2.90453	1.70427	0.207147	0.594722
sp|O60493|SNX3_HUMAN	SNX3_HUMAN	SNX3	0	0	0.206193	0.285126
sp|P55036|PSMD4_HUMAN	PSMD4_HUMAN	PSMD4	0	0	0.202003	-0.859743
sp|Q9UL54|TAOK2_HUMAN	TAOK2_HUMAN	TAOK2	2.44162	1.56257	0.200571	0.745621
sp|Q6XZF7|DNMBP_HUMAN	DNMBP_HUMAN	DNMBP	2.37868	1.5423	0.200463	0.297721
sp|Q9H2J7|S6A15_HUMAN	S6A15_HUMAN	SLC6A15	5.60813	2.36815	0.200089	0.38778
sp|P68363|TBA1B_HUMAN	TBA1B_HUMAN	TUBA1B	7.56155	2.74983	0.199891	-0.19384
sp|O15067|PUR4_HUMAN	PUR4_HUMAN	PFAS	0	0	0.199458	-0.466683
sp|P62910|RL32_HUMAN	RL32_HUMAN	RPL32	3.64517	1.90923	0.199027	-0.528266
sp|Q53H12|AGK_HUMAN	AGK_HUMAN	AGK	0	0	0.198963	-0.669471
sp|P63010|AP2B1_HUMAN	AP2B1_HUMAN	AP2B1	1.15316	1.07385	0.197843	0.405968
sp|Q9UGP8|SEC63_HUMAN	SEC63_HUMAN	SEC63	0	0	0.19684	-0.705781
sp|Q9NX58|LYAR_HUMAN	LYAR_HUMAN	LYAR	5.32394	2.30737	0.196637	-0.318163
sp|Q12789|TF3C1_HUMAN	TF3C1_HUMAN	GTF3C1	0	0	0.196021	0.418682
sp|Q9Y6M7|S4A7_HUMAN	S4A7_HUMAN	SLC4A7	4.91961	2.21802	0.19593	0.775907
sp|P61586|RHOA_HUMAN;sp|P08134|RHOC_HUMAN	RHOA_HUMAN	RHOA	0	0	0.193131	0.966838
sp|P29597|TYK2_HUMAN	TYK2_HUMAN	TYK2	6.81076	2.60974	0.192741	0.717044
sp|P52655|TF2AA_HUMAN	TF2AA_HUMAN	#N/A	#N/A	#N/A	0.192739	0.40837
sp|Q9Y2I1|NISCH_HUMAN	NISCH_HUMAN	NISCH	3.33087	1.82507	0.192457	-0.620361
sp|P62081|RS7_HUMAN	RS7_HUMAN	RPS7	2.37705	1.54177	0.190074	0.329803
sp|Q9H0A0|NAT10_HUMAN	NAT10_HUMAN	NAT10	3.14453	1.77328	0.18944	-0.725893
sp|Q96L93|KI16B_HUMAN	KI16B_HUMAN	KIF16B	1.83286	1.35383	0.188673	-0.287684
sp|Q8N3C0|ASCC3_HUMAN	ASCC3_HUMAN	ASCC3	6.38531	2.52692	0.187735	0.670249
sp|P51149|RAB7A_HUMAN	RAB7A_HUMAN	RAB7A	15.2782	3.90874	0.185154	0.791546
sp|Q9Y666|S12A7_HUMAN	S12A7_HUMAN	SLC12A7	7.00241	2.64621	0.185094	0.587915
sp|O15235|RT12_HUMAN	RT12_HUMAN	MRPS12	3.25225	1.8034	0.184275	-0.65912
sp|O60343|TBCD4_HUMAN	TBCD4_HUMAN	TBC1D4	0	0	0.183835	-0.500936
sp|Q8TB36|GDAP1_HUMAN	GDAP1_HUMAN	GDAP1	0	0	0.183229	-0.394899
sp|P35030|TRY3_HUMAN	TRY3_HUMAN	PRSS3	0	0	0.182903	-0.693262
sp|Q8IWS0|PHF6_HUMAN	PHF6_HUMAN	PHF6	5.16434	2.27252	0.181992	0.656663
sp|Q9HCM4|E41L5_HUMAN	E41L5_HUMAN	EPB41L5	1.23091	1.10947	0.180299	0.579282
sp|P60866|RS20_HUMAN	RS20_HUMAN	RPS20	2.59153	1.60982	0.180075	0.626073
sp|P31948|STIP1_HUMAN	STIP1_HUMAN	STIP1	5.22751	2.28637	0.179576	0.764849
sp|Q9C0B7|TNG6_HUMAN	TNG6_HUMAN	TANGO6	1.2914	1.1364	0.179338	-0.44666
sp|Q96A49|SYAP1_HUMAN	SYAP1_HUMAN	SYAP1	2.59964	1.61234	0.179047	0.506617
sp|Q9H6T3|RPAP3_HUMAN	RPAP3_HUMAN	RPAP3	1.3756	1.17286	0.178122	-0.641221
sp|P56589|PEX3_HUMAN	PEX3_HUMAN	PEX3	1.17219	1.08268	0.177937	0.518449
sp|Q13162|PRDX4_HUMAN	PRDX4_HUMAN	PRDX4	0	0	0.176892	0.420038
sp|P08195|4F2_HUMAN	4F2_HUMAN	SLC3A2	6.7405	2.59625	0.176823	0.311651
sp|Q9Y2L1|RRP44_HUMAN	RRP44_HUMAN	DIS3	0	0	0.17602	0.469259
sp|P53985|MOT1_HUMAN	MOT1_HUMAN	SLC16A1	0	0	0.175866	-0.622662
sp|P68431|H31_HUMAN;sp|Q71DI3|H32_HUMAN;sp|Q16695|H31T_HUMAN;sp|P84243|H33_HUMAN;sp|Q6NXT2|H3C_HUMAN	H31_HUMAN	HIST1H3A	0	0	0.17586	-0.647494
sp|Q9H7N4|SFR19_HUMAN	SFR19_HUMAN	SCAF1	1.70197	1.3046	0.1715	0.543375
sp|Q5SVZ6|ZMYM1_HUMAN	ZMYM1_HUMAN	ZMYM1	4.41687	2.10164	0.171148	0.670701
sp|Q7Z2K8|GRIN1_HUMAN	GRIN1_HUMAN	GPRIN1	8.3143	2.88345	0.170714	0.444323
sp|Q9UNX4|WDR3_HUMAN	WDR3_HUMAN	WDR3	1.22263	1.10573	0.169307	-0.425815
sp|P49327|FAS_HUMAN	FAS_HUMAN	FASN	14.8376	3.85196	0.167854	0.312837
sp|O15063|K0355_HUMAN	K0355_HUMAN	KIAA0355	0	0	0.167092	1.0284
sp|Q9BXF6|RFIP5_HUMAN	RFIP5_HUMAN	RAB11FIP5	4.82117	2.19572	0.166637	-0.62261
sp|Q99878|H2A1J_HUMAN;sp|Q96KK5|H2A1H_HUMAN;sp|Q9BTM1|H2AJ_HUMAN;sp|Q16777|H2A2C_HUMAN;sp|Q93077|H2A1C_HUMAN;sp|Q7L7L0|H2A3_HUMAN;sp|Q6FI13|H2A2A_HUMAN;sp|P20671|H2A1D_HUMAN;sp|P0C0S8|H2A1_HUMAN;sp|P04908|H2A1B_HUMAN;sp|Q71UI9|H2AV_HUMAN;sp|P0C0S5|H2AZ_HUMAN;sp|Q96QV6|H2A1A_HUMAN;sp|P16104|H2AX_HUMAN	H2A1J_HUMAN	HIST1H2AJ	0	0	0.166482	-0.461542
sp|Q9NVI1|FANCI_HUMAN	FANCI_HUMAN	FANCI	0	0	0.164558	0.375776
sp|Q9Y383|LC7L2_HUMAN	LC7L2_HUMAN	LUC7L2	0	0	0.163565	-0.654365
sp|Q15652|JHD2C_HUMAN	JHD2C_HUMAN	JMJD1C	24.8661	4.98659	0.16341	0.301913
sp|Q9UIQ6|LCAP_HUMAN	LCAP_HUMAN	LNPEP	2.06412	1.4367	0.16265	0.447588
sp|Q9UER7|DAXX_HUMAN	DAXX_HUMAN	DAXX	2.5885	1.60888	0.16209	-0.535967
sp|Q9Y4W6|AFG32_HUMAN	AFG32_HUMAN	AFG3L2	3.46902	1.86253	0.16151	-0.56999
sp|P22234|PUR6_HUMAN	PUR6_HUMAN	PAICS	0	0	0.160161	0.285593
sp|O60488|ACSL4_HUMAN	ACSL4_HUMAN	ACSL4	8.88315	2.98046	0.160143	0.384267
sp|Q9NPL8|TIDC1_HUMAN	TIDC1_HUMAN	TIMMDC1	0	0	0.158715	-0.323888
sp|Q5JTC6|AMER1_HUMAN	AMER1_HUMAN	AMER1	0	0	0.158398	0.209793
sp|Q8NFA0|UBP32_HUMAN	UBP32_HUMAN	USP32	1.98511	1.40894	0.156059	0.357952
sp|Q8NG31|KNL1_HUMAN	KNL1_HUMAN	KNL1	20.0779	4.48083	0.153324	0.701565
sp|Q13206|DDX10_HUMAN	DDX10_HUMAN	DDX10	0	0	0.153158	0.53823
sp|O15173|PGRC2_HUMAN	PGRC2_HUMAN	PGRMC2	3.65245	1.91114	0.153152	-0.240531
sp|Q9H4L5|OSBL3_HUMAN	OSBL3_HUMAN	OSBPL3	0.861671	0.928263	0.152962	-0.549976
sp|Q08378|GOGA3_HUMAN	GOGA3_HUMAN	GOLGA3	1.59867	1.26439	0.152113	-0.417942
sp|P42677|RS27_HUMAN	RS27_HUMAN	RPS27	3.19012	1.78609	0.152033	0.272134
sp|Q9NVN8|GNL3L_HUMAN	GNL3L_HUMAN	GNL3L	1.50878	1.22832	0.150882	0.516195
sp|P14618|KPYM_HUMAN	KPYM_HUMAN	PKM	1.39278	1.18016	0.150879	0.431722
sp|Q08AD1|CAMP2_HUMAN	CAMP2_HUMAN	CAMSAP2	5.4826	2.34149	0.150338	0.252271
sp|Q9Y4P3|TBL2_HUMAN	TBL2_HUMAN	TBL2	0.826674	0.909216	0.150235	0.503862
sp|P46778|RL21_HUMAN	RL21_HUMAN	RPL21	0.932665	0.965746	0.150149	-0.497315
sp|Q96KC8|DNJC1_HUMAN	DNJC1_HUMAN	DNAJC1	0	0	0.149726	0.306404
sp|Q9Y6M5|ZNT1_HUMAN	ZNT1_HUMAN	SLC30A1	2.00091	1.41454	0.149702	0.338831
sp|O00400|ACATN_HUMAN	ACATN_HUMAN	SLC33A1	5.68795	2.38494	0.14827	0.463756
sp|Q8N0Z3|SPICE_HUMAN	SPICE_HUMAN	SPICE1	2.208	1.48593	0.147617	-0.533718
sp|Q99618|CDCA3_HUMAN	CDCA3_HUMAN	CDCA3	5.02016	2.24057	0.146472	0.306326
sp|Q8WVM8|SCFD1_HUMAN	SCFD1_HUMAN	SCFD1	0	0	0.144357	0.28592
sp|Q13459|MYO9B_HUMAN	MYO9B_HUMAN	MYO9B	4.94232	2.22313	0.14433	0.58551
sp|P11021|GRP78_HUMAN	GRP78_HUMAN	HSPA5	3.80296	1.95012	0.144309	-0.533507
sp|P52757|CHIO_HUMAN	CHIO_HUMAN	#N/A	#N/A	#N/A	0.143619	0.540728
sp|Q9HDC5|JPH1_HUMAN	JPH1_HUMAN	JPH1	3.89891	1.97457	0.143553	0.364247
sp|Q8TER5|ARH40_HUMAN	ARH40_HUMAN	ARHGEF40	8.99558	2.99926	0.143397	0.307228
sp|P17066|HSP76_HUMAN	HSP76_HUMAN	HSPA6	0	0	0.142823	-0.339665
sp|Q70CQ3|UBP30_HUMAN	UBP30_HUMAN	USP30	2.95905	1.72019	0.14239	0.474046
sp|P49815|TSC2_HUMAN	TSC2_HUMAN	TSC2	0	0	0.139688	0.309066
sp|Q9UJU6|DBNL_HUMAN	DBNL_HUMAN	DBNL	6.39688	2.5292	0.139675	0.238449
sp|P11498|PYC_HUMAN	PYC_HUMAN	PC	14.4092	3.79594	0.139523	-0.280713
sp|O00264|PGRC1_HUMAN	PGRC1_HUMAN	PGRMC1	1.45008	1.20419	0.137488	0.442743
sp|P35268|RL22_HUMAN	RL22_HUMAN	RPL22	1.04068	1.02014	0.137193	0.486898
sp|Q96SU4|OSBL9_HUMAN	OSBL9_HUMAN	OSBPL9	0	0	0.135674	-0.21319
sp|Q9BU76|MMTA2_HUMAN	MMTA2_HUMAN	MMTAG2	2.96428	1.72171	0.13521	-0.197372
sp|P36542|ATPG_HUMAN	ATPG_HUMAN	ATP5F1C	3.2529	1.80358	0.133854	0.481832
sp|P63261|ACTG_HUMAN;sp|P60709|ACTB_HUMAN	ACTG_HUMAN	ACTG1	0	0	0.133334	0.302227
sp|Q9UPW5|CBPC1_HUMAN	CBPC1_HUMAN	AGTPBP1	4.17398	2.04303	0.132553	-0.413929
sp|P48651|PTSS1_HUMAN	PTSS1_HUMAN	PTDSS1	0	0	0.132278	0.373189
sp|O94842|TOX4_HUMAN	TOX4_HUMAN	TOX4	4.71772	2.17203	0.131877	0.54998
sp|Q8TEP8|CE192_HUMAN	CE192_HUMAN	CEP192	0	0	0.131739	-0.630487
sp|Q15361|TTF1_HUMAN	TTF1_HUMAN	TTF1	3.86027	1.96476	0.13165	0.581964
sp|Q9Y3U8|RL36_HUMAN	RL36_HUMAN	RPL36	3.23642	1.79901	0.131122	-0.358569
sp|O43896|KIF1C_HUMAN	KIF1C_HUMAN	KIF1C	0	0	0.129898	0.186779
sp|O60884|DNJA2_HUMAN	DNJA2_HUMAN	DNAJA2	0	0	0.129648	0.325086
sp|Q9UNZ2|NSF1C_HUMAN	NSF1C_HUMAN	NSFL1C	0	0	0.1277	0.310484
sp|Q9Y2X3|NOP58_HUMAN	NOP58_HUMAN	NOP58	3.34284	1.82834	0.126666	0.371285
sp|Q13823|NOG2_HUMAN	NOG2_HUMAN	GNL2	2.7187	1.64885	0.125408	-0.480065
sp|P11142|HSP7C_HUMAN	HSP7C_HUMAN	HSPA8	5.4702	2.33885	0.125106	0.409194
sp|Q13433|S39A6_HUMAN	S39A6_HUMAN	#N/A	#N/A	#N/A	0.125058	0.187212
sp|Q15942|ZYX_HUMAN	ZYX_HUMAN	ZYX	1.62924	1.27642	0.124182	0.320064
sp|P51532|SMCA4_HUMAN	SMCA4_HUMAN	SMARCA4	2.9452	1.71616	0.12342	0.248667
sp|O60841|IF2P_HUMAN	IF2P_HUMAN	EIF5B	3.99226	1.99806	0.122044	-0.433738
sp|P25398|RS12_HUMAN	RS12_HUMAN	RPS12	2.82631	1.68116	0.120934	-0.356538
sp|Q9BVC6|TM109_HUMAN	TM109_HUMAN	TMEM109	0	0	0.120409	0.285316
sp|Q8IYU8|MICU2_HUMAN	MICU2_HUMAN	MICU2	0	0	0.120195	-0.326506
sp|Q8TAT6|NPL4_HUMAN	NPL4_HUMAN	NPLOC4	1.57053	1.25321	0.119838	-0.427224
sp|P21359|NF1_HUMAN	NF1_HUMAN	NF1	2.31229	1.52062	0.118768	0.23439
sp|P05023|AT1A1_HUMAN	AT1A1_HUMAN	ATP1A1	4.39905	2.09739	0.118726	0.411873
sp|P61247|RS3A_HUMAN	RS3A_HUMAN	RPS3A	3.06905	1.75187	0.118522	-0.485345
sp|Q99615|DNJC7_HUMAN	DNJC7_HUMAN	DNAJC7	1.29085	1.13616	0.117253	0.395059
sp|Q99733|NP1L4_HUMAN	NP1L4_HUMAN	NAP1L4	2.10007	1.44916	0.116732	0.348547
sp|P51970|NDUA8_HUMAN	NDUA8_HUMAN	NDUFA8	0	0	0.116544	0.20791
sp|Q9UL25|RAB21_HUMAN	RAB21_HUMAN	RAB21	0	0	0.115323	0.271309
sp|P61619|S61A1_HUMAN	S61A1_HUMAN	SEC61A1	1.18908	1.09045	0.113581	-0.393085
sp|P61026|RAB10_HUMAN	RAB10_HUMAN	RAB10	17.9804	4.24033	0.11314	0.533804
sp|Q8IY81|SPB1_HUMAN	SPB1_HUMAN	FTSJ3	4.47305	2.11496	0.111093	0.290529
sp|Q14258|TRI25_HUMAN	TRI25_HUMAN	#N/A	#N/A	#N/A	0.110292	0.167959
sp|Q7L804|RFIP2_HUMAN	RFIP2_HUMAN	RAB11FIP2	0	0	0.108683	-0.336846
sp|P39023|RL3_HUMAN	RL3_HUMAN	RPL3	0	0	0.108619	-0.356435
sp|P61353|RL27_HUMAN	RL27_HUMAN	RPL27	3.31197	1.81988	0.108087	0.344243
sp|P61513|RL37A_HUMAN	RL37A_HUMAN	RPL37A	3.57099	1.88971	0.107277	-0.282853
sp|P40926|MDHM_HUMAN	MDHM_HUMAN	MDH2	0	0	0.105771	-0.281791
sp|Q00325|MPCP_HUMAN	MPCP_HUMAN	SLC25A3	3.32935	1.82465	0.103788	0.245384
sp|Q86V48|LUZP1_HUMAN	LUZP1_HUMAN	LUZP1	3.54712	1.88338	0.103524	0.199257
sp|Q96S66|CLCC1_HUMAN	CLCC1_HUMAN	CLCC1	2.65528	1.6295	0.102517	0.453699
sp|Q99570|PI3R4_HUMAN	PI3R4_HUMAN	PIK3R4	0	0	0.102284	-0.190188
sp|P46781|RS9_HUMAN	RS9_HUMAN	RPS9	3.29341	1.81478	0.101403	0.354992
sp|P42695|CNDD3_HUMAN	CNDD3_HUMAN	NCAPD3	1.39872	1.18267	0.0992945	0.233206
sp|A0FGR8|ESYT2_HUMAN	ESYT2_HUMAN	ESYT2	3.01072	1.73514	0.0991177	0.335641
sp|P00338|LDHA_HUMAN	LDHA_HUMAN	LDHA	5.64043	2.37496	0.0979591	-0.351307
sp|P62263|RS14_HUMAN	RS14_HUMAN	RPS14	3.23929	1.7998	0.0959807	-0.291826
sp|Q86UP2|KTN1_HUMAN	KTN1_HUMAN	KTN1	7.81951	2.79634	0.0959084	0.224433
sp|Q9NWT8|AKIP_HUMAN	AKIP_HUMAN	AURKAIP1	0	0	0.0954972	0.410511
sp|Q5XPI4|RN123_HUMAN	RN123_HUMAN	RNF123	1.32858	1.15264	0.0954209	-0.257178
sp|Q9Y295|DRG1_HUMAN	DRG1_HUMAN	DRG1	0	0	0.0946315	0.13155
sp|P17987|TCPA_HUMAN	TCPA_HUMAN	TCP1	3.16188	1.77817	0.0943915	0.383911
sp|Q13017|RHG05_HUMAN	RHG05_HUMAN	ARHGAP5	3.30769	1.81871	0.094205	0.253932
sp|Q9UBP9|GULP1_HUMAN	GULP1_HUMAN	GULP1	0	0	0.093452	0.286697
sp|O43402|EMC8_HUMAN	EMC8_HUMAN	EMC8	0	0	0.0923707	0.172376
sp|P24928|RPB1_HUMAN	RPB1_HUMAN	POLR2A	3.38562	1.84001	0.092242	-0.412188
sp|Q9BVP2|GNL3_HUMAN	GNL3_HUMAN	GNL3	8.28061	2.87761	0.0893259	0.112563
sp|P0DMV9|HS71B_HUMAN;sp|P0DMV8|HS71A_HUMAN	HS71B_HUMAN	HSPA1B	0	0	0.0885615	0.215668
sp|Q86XL3|ANKL2_HUMAN	ANKL2_HUMAN	ANKLE2	4.9544	2.22585	0.0880846	0.303496
sp|P49207|RL34_HUMAN	RL34_HUMAN	RPL34	3.12409	1.76751	0.0879835	0.167474
sp|Q9NX40|OCAD1_HUMAN	OCAD1_HUMAN	OCIAD1	3.28441	1.81229	0.0877145	0.238988
sp|Q9NNW5|WDR6_HUMAN	WDR6_HUMAN	WDR6	1.32097	1.14933	0.086751	-0.293076
sp|P78527|PRKDC_HUMAN	PRKDC_HUMAN	PRKDC	8.04604	2.83655	0.0850275	-0.292879
sp|P09874|PARP1_HUMAN	PARP1_HUMAN	PARP1	3.95279	1.98816	0.0842984	-0.173106
sp|Q9H1K0|RBNS5_HUMAN	RBNS5_HUMAN	RBSN	0	0	0.0838479	0.171779
sp|E9PRG8|CK098_HUMAN	CK098_HUMAN	C11orf98	0	0	0.0836817	0.274879
sp|Q71U36|TBA1A_HUMAN	TBA1A_HUMAN	TUBA1A	0	0	0.0826965	-0.223751
sp|Q9BQA1|MEP50_HUMAN	MEP50_HUMAN	WDR77	0	0	0.0821255	0.218987
sp|Q9NSE4|SYIM_HUMAN	SYIM_HUMAN	IARS2	5.75561	2.39909	0.0809561	-0.388759
sp|Q9HAU5|RENT2_HUMAN	RENT2_HUMAN	UPF2	0	0	0.0801177	-0.251554
sp|Q6ZSZ5|ARHGI_HUMAN	ARHGI_HUMAN	ARHGEF18	0	0	0.0769288	-0.239184
sp|P68371|TBB4B_HUMAN	TBB4B_HUMAN	TUBB4B	7.08615	2.66198	0.0769057	-0.153171
sp|P27635|RL10_HUMAN	RL10_HUMAN	RPL10	5.79551	2.40739	0.0761317	0.0966145
sp|Q00535|CDK5_HUMAN	CDK5_HUMAN	CDK5	0	0	0.0743831	0.120339
sp|P16152|CBR1_HUMAN	CBR1_HUMAN	CBR1	0	0	0.073567	0.316203
sp|P25685|DNJB1_HUMAN	DNJB1_HUMAN	DNAJB1	1.37648	1.17324	0.0726673	0.2532
sp|Q12872|SFSWA_HUMAN	SFSWA_HUMAN	SFSWAP	0	0	0.0726591	-0.186527
sp|Q8TD19|NEK9_HUMAN	NEK9_HUMAN	NEK9	2.04079	1.42856	0.0726354	0.230314
sp|Q9Y4I1|MYO5A_HUMAN	MYO5A_HUMAN	MYO5A	1.3745	1.17239	0.072342	0.169919
sp|Q9C0C4|SEM4C_HUMAN	SEM4C_HUMAN	SEMA4C	1.19297	1.09223	0.0723204	-0.23089
sp|P23528|COF1_HUMAN	COF1_HUMAN	CFL1	0	0	0.0718328	0.224446
sp|Q14683|SMC1A_HUMAN	SMC1A_HUMAN	SMC1A	1.85904	1.36347	0.0710869	0.310681
sp|P62280|RS11_HUMAN	RS11_HUMAN	RPS11	3.5649	1.88809	0.0710392	-0.266662
sp|Q9P2N5|RBM27_HUMAN	RBM27_HUMAN	RBM27	4.90705	2.21519	0.0706121	0.20071
sp|Q7L014|DDX46_HUMAN	DDX46_HUMAN	DDX46	0	0	0.0703099	0.122575
sp|Q71UM5|RS27L_HUMAN	RS27L_HUMAN	RPS27L	39.6924	6.30019	0.0701174	0.351864
sp|P16401|H15_HUMAN	H15_HUMAN	HIST1H1B	2.9954	1.73072	0.0685046	0.238624
sp|P50990|TCPQ_HUMAN	TCPQ_HUMAN	CCT8	9.41054	3.06766	0.0683211	-0.145989
sp|Q9NZ52|GGA3_HUMAN	GGA3_HUMAN	GGA3	0	0	0.0679447	0.193617
sp|P53621|COPA_HUMAN	COPA_HUMAN	COPA	0	0	0.0677453	-0.189689
sp|O43592|XPOT_HUMAN	XPOT_HUMAN	XPOT	0.984217	0.992077	0.067708	0.184612
sp|O60784|TOM1_HUMAN	TOM1_HUMAN	TOM1	0	0	0.0655092	-0.093474
sp|O75683|SURF6_HUMAN	SURF6_HUMAN	SURF6	2.65583	1.62967	0.0652279	0.299999
sp|Q96JB5|CK5P3_HUMAN	CK5P3_HUMAN	CDK5RAP3	0	0	0.065124	0.145497
sp|P62917|RL8_HUMAN	RL8_HUMAN	RPL8	0.922128	0.960275	0.0646833	0.247238
sp|Q13136|LIPA1_HUMAN	LIPA1_HUMAN	PPFIA1	3.03231	1.74135	0.0646075	-0.185875
sp|O15357|SHIP2_HUMAN	SHIP2_HUMAN	INPPL1	0	0	0.0644831	0.111092
sp|Q9BRS2|RIOK1_HUMAN	RIOK1_HUMAN	RIOK1	4.46099	2.11211	0.0634912	0.157665
sp|P02786|TFR1_HUMAN	TFR1_HUMAN	TFRC	1.64496	1.28256	0.0615487	-0.207611
sp|P18206|VINC_HUMAN	VINC_HUMAN	VCL	4.66244	2.15927	0.0596958	-0.281538
sp|O00763|ACACB_HUMAN	ACACB_HUMAN	ACACB	7.55792	2.74917	0.0591518	0.326868
sp|Q9ULF5|S39AA_HUMAN	S39AA_HUMAN	SLC39A10	0	0	0.0591433	0.13114
sp|Q15637|SF01_HUMAN	SF01_HUMAN	SF1	0	0	0.0585793	-0.13244
sp|Q14739|LBR_HUMAN	LBR_HUMAN	LBR	5.4639	2.3375	0.0568471	0.18415
sp|P62258|1433E_HUMAN	1433E_HUMAN	#N/A	1.12804	1.06209	0.0556133	0.159591
sp|P46060|RAGP1_HUMAN	RAGP1_HUMAN	RANGAP1	4.26991	2.06638	0.0530902	0.284042
sp|Q8IWJ2|GCC2_HUMAN	GCC2_HUMAN	GCC2	7.67271	2.76997	0.0528325	-0.300669
sp|A5YKK6|CNOT1_HUMAN	CNOT1_HUMAN	CNOT1	4.61174	2.1475	0.052035	0.168516
sp|P56192|SYMC_HUMAN	SYMC_HUMAN	MARS	0.961463	0.980542	0.0519902	0.134747
sp|P62269|RS18_HUMAN	RS18_HUMAN	RPS18	3.89185	1.97278	0.0509765	-0.15238
sp|O94813|SLIT2_HUMAN	SLIT2_HUMAN	SLIT2	3.33803	1.82703	0.050364	0.210731
sp|O75962|TRIO_HUMAN	TRIO_HUMAN	TRIO	14.5291	3.8117	0.0498725	-0.105084
sp|Q9Y265|RUVB1_HUMAN	RUVB1_HUMAN	RUVBL1	3.34458	1.82882	0.048445	0.198684
sp|Q6UB35|C1TM_HUMAN	C1TM_HUMAN	MTHFD1L	0	0	0.0482524	0.150229
sp|Q9UEW8|STK39_HUMAN	STK39_HUMAN	STK39	0	0	0.0474123	0.0672831
sp|Q5JTH9|RRP12_HUMAN	RRP12_HUMAN	RRP12	8.83573	2.9725	0.0470756	-0.0775694
sp|P55209|NP1L1_HUMAN	NP1L1_HUMAN	NAP1L1	1.54661	1.24363	0.0461077	0.163444
sp|P23396|RS3_HUMAN	RS3_HUMAN	RPS3	4.05571	2.01388	0.0457333	0.167
sp|Q9Y2X9|ZN281_HUMAN	ZN281_HUMAN	ZNF281	1.51618	1.23133	0.0456443	-0.149785
sp|Q9BPX6|MICU1_HUMAN	MICU1_HUMAN	MICU1	1.83462	1.35448	0.0451208	0.123639
sp|O00541|PESC_HUMAN	PESC_HUMAN	PES1	1.18388	1.08806	0.0446539	0.159345
sp|O94762|RECQ5_HUMAN	RECQ5_HUMAN	#N/A	#N/A	#N/A	0.0445526	-0.215816
sp|Q96AG4|LRC59_HUMAN	LRC59_HUMAN	LRRC59	2.47048	1.57177	0.0438213	-0.114189
sp|O95905|ECD_HUMAN	ECD_HUMAN	ECD	0	0	0.0434574	0.123339
sp|Q14137|BOP1_HUMAN	BOP1_HUMAN	BOP1	0	0	0.042203	-0.157972
sp|P47914|RL29_HUMAN	RL29_HUMAN	RPL29	2.54466	1.5952	0.0421953	-0.0833774
sp|Q5T3I0|GPTC4_HUMAN	GPTC4_HUMAN	GPATCH4	3.55001	1.88415	0.0421422	-0.141076
sp|P07437|TBB5_HUMAN	TBB5_HUMAN	TUBB	7.75715	2.78517	0.0410797	-0.0911328
sp|Q9Y3P9|RBGP1_HUMAN	RBGP1_HUMAN	RABGAP1	1.3597	1.16606	0.0410544	0.132122
sp|Q9UM00|TMCO1_HUMAN	TMCO1_HUMAN	TMCO1	0	0	0.0409912	-0.125624
sp|Q3ZCM7|TBB8_HUMAN	TBB8_HUMAN	#N/A	#N/A	#N/A	0.0406411	-0.138778
sp|Q9H6S0|YTDC2_HUMAN	YTDC2_HUMAN	YTHDC2	0	0	0.0404613	-0.111602
sp|Q8NBF6|AVL9_HUMAN	AVL9_HUMAN	AVL9	0	0	0.0384757	0.0760392
sp|Q9UPP1|PHF8_HUMAN	PHF8_HUMAN	PHF8	1.56521	1.25108	0.0375757	-0.113698
sp|Q68DQ2|CRBG3_HUMAN	CRBG3_HUMAN	CRYBG3	7.80121	2.79307	0.0372758	-0.203963
sp|Q9Y6R0|NUMBL_HUMAN	NUMBL_HUMAN	NUMBL	4.67185	2.16145	0.0372323	0.116298
sp|P57737|CORO7_HUMAN	CORO7_HUMAN	CORO7	0	0	0.0371952	-0.0651671
sp|O95202|LETM1_HUMAN	LETM1_HUMAN	LETM1	7.49457	2.73762	0.0371441	-0.172966
sp|P42766|RL35_HUMAN	RL35_HUMAN	RPL35	5.50263	2.34577	0.0361639	-0.0531471
sp|Q8WTT2|NOC3L_HUMAN	NOC3L_HUMAN	NOC3L	3.93216	1.98297	0.0333948	0.115742
sp|Q8TD26|CHD6_HUMAN	CHD6_HUMAN	CHD6	21.1442	4.59828	0.0332024	0.0670173
sp|P15880|RS2_HUMAN	RS2_HUMAN	RPS2	2.93356	1.71276	0.0329633	-0.0810589
sp|Q9NR30|DDX21_HUMAN	DDX21_HUMAN	DDX21	0	0	0.0328686	0.0411864
sp|B2RTY4|MYO9A_HUMAN	MYO9A_HUMAN	MYO9A	30.196	5.49509	0.0320313	0.108359
sp|Q9HD67|MYO10_HUMAN	MYO10_HUMAN	MYO10	1.9608	1.40028	0.0314481	-0.119838
sp|P13639|EF2_HUMAN	EF2_HUMAN	EEF2	3.60432	1.8985	0.031443	0.0736498
sp|Q3ZCQ8|TIM50_HUMAN	TIM50_HUMAN	TIMM50	0.770011	0.877503	0.0285141	0.0963573
sp|Q93009|UBP7_HUMAN	UBP7_HUMAN	USP7	0	0	0.0281808	0.080087
sp|Q8IVF2|AHNK2_HUMAN	AHNK2_HUMAN	AHNAK2	6.42988	2.53572	0.0273937	-0.154617
sp|Q9BXW9|FACD2_HUMAN	FACD2_HUMAN	FANCD2	1.04211	1.02084	0.0272018	-0.0813917
sp|P32121|ARRB2_HUMAN	ARRB2_HUMAN	ARRB2	0	0	0.0252351	-0.0915671
sp|O75431|MTX2_HUMAN	MTX2_HUMAN	MTX2	0	0	0.0249037	0.068794
sp|P61006|RAB8A_HUMAN	RAB8A_HUMAN	RAB8A	0	0	0.0245939	-0.14263
sp|O14964|HGS_HUMAN	HGS_HUMAN	HGS	1.86099	1.36418	0.0243108	0.0727041
sp|P04843|RPN1_HUMAN	RPN1_HUMAN	RPN1	1.1875	1.08973	0.0225553	-0.0855862
sp|P49757|NUMB_HUMAN	NUMB_HUMAN	NUMB	4.04504	2.01123	0.0224387	0.0899086
sp|P49411|EFTU_HUMAN	EFTU_HUMAN	TUFM	4.04105	2.01024	0.0224138	0.0660967
sp|P57088|TMM33_HUMAN	TMM33_HUMAN	TMEM33	0	0	0.0222986	0.0561748
sp|P50991|TCPD_HUMAN	TCPD_HUMAN	CCT4	1.95784	1.39923	0.0222225	0.0489576
sp|Q8TC07|TBC15_HUMAN	TBC15_HUMAN	TBC1D15	4.68341	2.16412	0.0217972	0.0962251
sp|P40855|PEX19_HUMAN	PEX19_HUMAN	PEX19	1.55795	1.24818	0.0212756	-0.0847041
sp|P61254|RL26_HUMAN	RL26_HUMAN	RPL26	6.25898	2.5018	0.0210599	-0.0366105
sp|Q15382|RHEB_HUMAN	RHEB_HUMAN	RHEB	2.58035	1.60635	0.020369	-0.127707
sp|P55072|TERA_HUMAN	TERA_HUMAN	VCP	0	0	0.0201684	-0.0599284
sp|Q9BZH6|WDR11_HUMAN	WDR11_HUMAN	WDR11	0	0	0.0199136	-0.0346069
sp|Q14103|HNRPD_HUMAN	HNRPD_HUMAN	HNRNPD	0	0	0.0198979	0.0425102
sp|P11586|C1TC_HUMAN	C1TC_HUMAN	MTHFD1	2.59836	1.61194	0.0198042	0.0873949
sp|Q06124|PTN11_HUMAN	PTN11_HUMAN	PTPN11	0	0	0.0193763	0.0445766
sp|Q8TCT9|HM13_HUMAN	HM13_HUMAN	HM13	1.47102	1.21285	0.0185057	0.0688488
sp|Q8IZ21|PHAR4_HUMAN	PHAR4_HUMAN	PHACTR4	2.06916	1.43846	0.0175956	0.0517691
sp|Q9C0C2|TB182_HUMAN	TB182_HUMAN	TNKS1BP1	2.21233	1.48739	0.0175142	0.0315745
sp|Q99879|H2B1M_HUMAN;sp|Q99880|H2B1L_HUMAN;sp|Q99877|H2B1N_HUMAN;sp|Q93079|H2B1H_HUMAN;sp|Q5QNW6|H2B2F_HUMAN;sp|P62807|H2B1C_HUMAN;sp|P58876|H2B1D_HUMAN;sp|P57053|H2BFS_HUMAN;sp|O60814|H2B1K_HUMAN	H2B1M_HUMAN	#N/A	#N/A	#N/A	0.0168214	0.0634428
sp|Q15042|RB3GP_HUMAN	RB3GP_HUMAN	RAB3GAP1	3.64251	1.90854	0.0164345	-0.082479
sp|Q96R06|SPAG5_HUMAN	SPAG5_HUMAN	SPAG5	1.3938	1.18059	0.0162169	0.0603449
sp|Q92841|DDX17_HUMAN	DDX17_HUMAN	DDX17	0	0	0.0149763	0.0517748
sp|P26374|RAE2_HUMAN	RAE2_HUMAN	CHML	0.909766	0.953816	0.0147434	-0.0611866
sp|Q00839|HNRPU_HUMAN	HNRPU_HUMAN	HNRNPU	1.29627	1.13854	0.0138198	-0.053292
sp|Q9UQR0|SCML2_HUMAN	SCML2_HUMAN	SCML2	0	0	0.0133401	0.021808
sp|P45974|UBP5_HUMAN	UBP5_HUMAN	USP5	1.98394	1.40852	0.0112539	0.0353964
sp|P11940|PABP1_HUMAN	PABP1_HUMAN	PABPC1	0	0	0.00985692	-0.0272083
sp|P48634|PRC2A_HUMAN	PRC2A_HUMAN	PRRC2A	2.19541	1.48169	0.00870335	0.0250296
sp|O15042|SR140_HUMAN	SR140_HUMAN	U2SURP	0	0	0.00846626	0.0312938
sp|Q9NVI7|ATD3A_HUMAN	ATD3A_HUMAN	ATAD3A	3.20626	1.7906	0.00824693	0.0298053
sp|Q92667|AKAP1_HUMAN	AKAP1_HUMAN	#N/A	11.3809	3.37356	0.00796532	0.015947
sp|P10809|CH60_HUMAN	CH60_HUMAN	HSPD1	2.76787	1.66369	0.00753835	-0.0298001
sp|Q27J81|INF2_HUMAN	INF2_HUMAN	INF2	0	0	0.00737194	0.0131513
sp|P20340|RAB6A_HUMAN	RAB6A_HUMAN	RAB6A	34.2213	5.84989	0.00674815	0.0348585
sp|P63173|RL38_HUMAN	RL38_HUMAN	RPL38	3.5184	1.87574	0.00594917	0.0226388
sp|Q9Y678|COPG1_HUMAN	COPG1_HUMAN	COPG1	0	0	0.00528495	-0.0143785
sp|Q12797|ASPH_HUMAN	ASPH_HUMAN	ASPH	0	0	0.00494683	0.0120167
sp|Q8IWR0|Z3H7A_HUMAN	Z3H7A_HUMAN	ZC3H7A	0	0	0.00437451	-0.0106182
sp|P51587|BRCA2_HUMAN	BRCA2_HUMAN	BRCA2	0	0	0.00271016	0.00761396
sp|P18583|SON_HUMAN	SON_HUMAN	SON	5.86852	2.4225	0.00236275	-0.00570791
sp|Q8WVS4|WDR60_HUMAN	WDR60_HUMAN	WDR60	2.84156	1.68569	0.000190643	0.000837555

## Sheet: Rac1del QL
Majority protein IDs	Uniprot	Gene NAME	WD score	Root WD score	Log Student's T-test p-value Rac1dCT QL	Student's T-test Difference Rac1dCT QL
sp|Q96F07|CYFP2_HUMAN	CYFP2_HUMAN	CYFIP2	8096.2	89.9789	24.6927	8.6327
sp|Q14155|ARHG7_HUMAN	ARHG7_HUMAN	ARHGEF7	14498.1	120.408	22.6901	7.97885
sp|Q13177|PAK2_HUMAN	PAK2_HUMAN	PAK2	3740.62	61.1606	21.952	9.98764
sp|Q9Y6W5|WASF2_HUMAN	WASF2_HUMAN	WASF2	11568.1	107.555	19.9998	7.87302
sp|Q13576|IQGA2_HUMAN	IQGA2_HUMAN	IQGAP2	1584.29	39.8032	19.5428	7.62867
sp|Q15052|ARHG6_HUMAN	ARHG6_HUMAN	ARHGEF6	9338.24	96.6346	18.0938	7.00434
sp|Q8IZP0|ABI1_HUMAN	ABI1_HUMAN	ABI1	475.815	21.8132	17.5317	6.08228
sp|Q7L576|CYFP1_HUMAN	CYFP1_HUMAN	CYFIP1	2333.64	48.3077	17.451	6.85485
sp|Q5SYE7|NHSL1_HUMAN	NHSL1_HUMAN	NHSL1	6671.77	81.6809	17.0389	7.36519
sp|Q8WXE0|CSKI2_HUMAN	CSKI2_HUMAN	CASKIN2	1097.71	33.1318	14.9292	6.69982
sp|O15357|SHIP2_HUMAN	SHIP2_HUMAN	INPPL1	854.793	29.2368	14.9016	6.52955
sp|Q92558|WASF1_HUMAN	WASF1_HUMAN	WASF1	801.138	28.3044	14.5734	5.03025
sp|Q6XZF7|DNMBP_HUMAN	DNMBP_HUMAN	DNMBP	317.662	17.8231	14.5371	7.75189
sp|P46940|IQGA1_HUMAN	IQGA1_HUMAN	IQGAP1	922.938	30.3799	12.0791	4.86387
sp|Q9NQW6|ANLN_HUMAN	ANLN_HUMAN	ANLN	1567.37	39.5901	11.0957	4.60565
sp|Q9Y5S2|MRCKB_HUMAN	MRCKB_HUMAN	CDC42BPB	1482.82	38.5074	8.81484	5.5764
sp|O95219|SNX4_HUMAN	SNX4_HUMAN	SNX4	236.719	15.3857	8.76527	4.19999
sp|Q13017|RHG05_HUMAN	RHG05_HUMAN	ARHGAP5	1373.74	37.064	8.30553	6.6562
sp|Q9UJX2|CDC23_HUMAN	CDC23_HUMAN	CDC23	595.78	24.4086	8.11118	4.21421
sp|Q12979|ABR_HUMAN	ABR_HUMAN	ABR	1174.01	34.2639	8.03584	3.49825
sp|P13639|EF2_HUMAN	EF2_HUMAN	EEF2	0.840875	0.916992	7.96068	-5.66004
sp|Q92625|ANS1A_HUMAN	ANS1A_HUMAN	ANKS1A	46.6843	6.83259	7.88129	7.38233
sp|Q96DT7|ZBT10_HUMAN	ZBT10_HUMAN	ZBTB10	1116.92	33.4203	7.03516	3.44016
sp|P63000|RAC1_HUMAN;sp|P60763|RAC3_HUMAN;sp|P15153|RAC2_HUMAN	RAC1_HUMAN	RAC1	7253.29	85.1663	6.44511	13.7443
sp|Q5VWQ8|DAB2P_HUMAN	DAB2P_HUMAN	DAB2IP	85.9855	9.27284	6.41281	3.70745
sp|P08238|HS90B_HUMAN	HS90B_HUMAN	HSP90AB1	2.46921	1.57137	6.31696	-5.03928
sp|Q9NZN5|ARHGC_HUMAN	ARHGC_HUMAN	ARHGEF12	409.821	20.244	6.26509	6.33398
sp|Q8IWI9|MGAP_HUMAN	MGAP_HUMAN	MGA	7606.34	87.2143	6.01625	3.15233
sp|A7KAX9|RHG32_HUMAN	RHG32_HUMAN	ARHGAP32	455.778	21.349	5.90097	7.08184
sp|Q9NRY4|RHG35_HUMAN	RHG35_HUMAN	ARHGAP35	186.884	13.6706	5.82065	7.8393
sp|Q14161|GIT2_HUMAN	GIT2_HUMAN	GIT2	542.962	23.3015	5.76359	4.01657
sp|Q8TER5|ARH40_HUMAN	ARH40_HUMAN	ARHGEF40	35.8717	5.9893	5.5876	5.51876
sp|Q9NSV4|DIAP3_HUMAN	DIAP3_HUMAN	DIAPH3	66.664	8.1648	5.47182	7.06051
sp|Q2M1Z3|RHG31_HUMAN	RHG31_HUMAN	ARHGAP31	1298.11	36.0293	5.36314	2.40741
sp|Q5VTE0|EF1A3_HUMAN;sp|P68104|EF1A1_HUMAN	EF1A3_HUMAN	EEF1A1P5	0	0	5.30708	-3.20559
sp|Q9P206|K1522_HUMAN	K1522_HUMAN	KIAA1522	0	0	5.083	2.49432
sp|Q9Y2X7|GIT1_HUMAN	GIT1_HUMAN	GIT1	384.43	19.6069	5.07416	4.45663
sp|Q9C0D2|CE295_HUMAN	CE295_HUMAN	CEP295	240.564	15.5101	5.04738	2.63407
sp|P11274|BCR_HUMAN	BCR_HUMAN	BCR	48.6547	6.97529	4.79068	7.48239
sp|P18031|PTN1_HUMAN	PTN1_HUMAN	PTPN1	2.25402	1.50134	4.6545	-3.61503
sp|Q9NQY0|BIN3_HUMAN	BIN3_HUMAN	BIN3	564.332	23.7557	4.39144	2.15656
sp|Q58EX7|PKHG4_HUMAN	PKHG4_HUMAN	PLEKHG4	47.9031	6.9212	4.35595	3.40965
sp|Q9NYB9|ABI2_HUMAN	ABI2_HUMAN	ABI2	475.815	21.8132	4.16186	2.39605
sp|Q9C0H5|RHG39_HUMAN	RHG39_HUMAN	ARHGAP39	810.072	28.4618	4.09879	2.49735
sp|Q00587|BORG5_HUMAN	BORG5_HUMAN	CDC42EP1	146.823	12.1171	4.09671	2.54632
sp|Q5VT25|MRCKA_HUMAN	MRCKA_HUMAN	CDC42BPA	260.134	16.1287	3.99882	6.55287
sp|Q4KMZ1|IQCC_HUMAN	IQCC_HUMAN	#N/A	#N/A	#N/A	3.88339	5.55061
sp|P19367|HXK1_HUMAN	HXK1_HUMAN	HK1	3.43738	1.85402	3.83254	-5.72527
sp|Q9H0H5|RGAP1_HUMAN	RGAP1_HUMAN	RACGAP1	6028.7	77.6447	3.76039	2.28113
sp|Q8NE71|ABCF1_HUMAN	ABCF1_HUMAN	ABCF1	1.36626	1.16887	3.75063	-4.69846
sp|P05023|AT1A1_HUMAN	AT1A1_HUMAN	ATP1A1	0.490459	0.700328	3.70704	-5.47576
sp|A6NKD9|CC85C_HUMAN	CC85C_HUMAN	CCDC85C	4.6891	2.16543	3.46986	2.06824
sp|Q02543|RL18A_HUMAN	RL18A_HUMAN	RPL18A	0	0	3.38839	2.50889
sp|O75379|VAMP4_HUMAN	VAMP4_HUMAN	VAMP4	0	0	3.28881	1.96051
sp|O15056|SYNJ2_HUMAN	SYNJ2_HUMAN	SYNJ2	134.247	11.5865	3.08746	3.17361
sp|O94826|TOM70_HUMAN	TOM70_HUMAN	TOMM70	2.27576	1.50856	3.05017	-3.52124
sp|Q9Y266|NUDC_HUMAN	NUDC_HUMAN	NUDC	1.92561	1.38766	2.89733	-3.29346
sp|Q16527|CSRP2_HUMAN	CSRP2_HUMAN	CSRP2	0	0	2.8628	1.64058
sp|Q9BZ29|DOCK9_HUMAN	DOCK9_HUMAN	DOCK9	1089.43	33.0065	2.84862	5.17095
sp|Q5C9Z4|NOM1_HUMAN	NOM1_HUMAN	NOM1	1.08556	1.0419	2.82415	-3.95018
sp|Q9UJF2|NGAP_HUMAN	NGAP_HUMAN	RASAL2	9.93028	3.15123	2.71439	4.71796
sp|Q9Y2J2|E41L3_HUMAN	E41L3_HUMAN	EPB41L3	0.50361	0.709655	2.70742	-4.79534
sp|Q96A65|EXOC4_HUMAN	EXOC4_HUMAN	EXOC4	1.43223	1.19676	2.68246	-4.52275
sp|Q9H4A5|GLP3L_HUMAN	GLP3L_HUMAN	GOLPH3L	0	0	2.65297	2.72382
sp|Q15366|PCBP2_HUMAN	PCBP2_HUMAN	PCBP2	1.73032	1.31542	2.65269	-2.82404
sp|P0DMV9|HS71B_HUMAN;sp|P0DMV8|HS71A_HUMAN	HS71B_HUMAN	HSPA1B	0	0	2.55469	-2.82697
sp|Q16513|PKN2_HUMAN	PKN2_HUMAN	PKN2	42.2939	6.50338	2.40955	4.1682
sp|Q6PJT7|ZC3HE_HUMAN	ZC3HE_HUMAN	ZC3H14	15.4627	3.93227	2.38927	1.74605
sp|Q9H4A6|GOLP3_HUMAN	GOLP3_HUMAN	GOLPH3	258.192	16.0684	2.2928	3.27008
sp|Q9UH65|SWP70_HUMAN	SWP70_HUMAN	SWAP70	90.0138	9.48756	2.29247	1.66505
sp|Q15365|PCBP1_HUMAN	PCBP1_HUMAN	PCBP1	2.36656	1.53836	2.28998	-2.26399
sp|Q86WR0|CCD25_HUMAN	CCD25_HUMAN	CCDC25	0	0	2.28477	2.01002
sp|P16152|CBR1_HUMAN	CBR1_HUMAN	CBR1	192.174	13.8627	2.27856	4.67509
sp|Q8IY81|SPB1_HUMAN	SPB1_HUMAN	FTSJ3	2.00958	1.4176	2.18448	-3.19677
sp|P09874|PARP1_HUMAN	PARP1_HUMAN	PARP1	2.27344	1.50779	2.16347	-2.88
sp|Q7KZF4|SND1_HUMAN	SND1_HUMAN	SND1	0	0	2.12838	-4.48505
sp|O60879|DIAP2_HUMAN	DIAP2_HUMAN	DIAPH2	25.1921	5.01917	2.11221	2.24512
sp|Q9UER7|DAXX_HUMAN	DAXX_HUMAN	DAXX	0.724116	0.85095	2.10124	-3.85969
sp|P48444|COPD_HUMAN	COPD_HUMAN	ARCN1	27.0305	5.19908	2.09014	3.47547
sp|P42677|RS27_HUMAN	RS27_HUMAN	RPS27	3.93754	1.98432	2.0797	1.90775
sp|Q5TC12|ATPF1_HUMAN	ATPF1_HUMAN	ATPAF1	0.692425	0.832121	1.87793	-3.14172
sp|Q15072|OZF_HUMAN	OZF_HUMAN	ZNF146	77.9504	8.82895	1.85216	1.60127
sp|P49458|SRP09_HUMAN	SRP09_HUMAN	SRP9	289.582	17.0171	1.84514	1.91725
sp|Q9UPY6|WASF3_HUMAN	WASF3_HUMAN	WASF3	15.4627	3.93227	1.84357	1.22806
sp|Q2M1P5|KIF7_HUMAN	KIF7_HUMAN	KIF7	21.1136	4.59496	1.83871	2.49585
sp|Q9BXK5|B2L13_HUMAN	B2L13_HUMAN	BCL2L13	3.00223	1.73269	1.82736	-2.32218
sp|P62847|RS24_HUMAN	RS24_HUMAN	RPS24	3.7583	1.93863	1.82698	-1.73755
sp|Q8ND24|RN214_HUMAN	RN214_HUMAN	RNF214	66.551	8.15788	1.80277	1.71136
sp|Q96L33|RHOV_HUMAN;sp|Q7L0Q8|RHOU_HUMAN	RHOV_HUMAN	#N/A	#N/A	#N/A	1.8025	2.34159
sp|Q8TC07|TBC15_HUMAN	TBC15_HUMAN	TBC1D15	1.82687	1.35162	1.79334	-3.972
sp|Q3V6T2|GRDN_HUMAN	GRDN_HUMAN	CCDC88A	7.02842	2.65112	1.77276	3.43853
sp|Q7L804|RFIP2_HUMAN	RFIP2_HUMAN	RAB11FIP2	14.961	3.86795	1.74815	2.94535
sp|Q8WVS4|WDR60_HUMAN	WDR60_HUMAN	WDR60	0.645497	0.803428	1.74039	-3.26566
sp|Q9H7C9|AAMDC_HUMAN	AAMDC_HUMAN	AAMDC	2.9331	1.71263	1.73607	2.49081
sp|P17066|HSP76_HUMAN	HSP76_HUMAN	HSPA6	0	0	1.72387	-2.22258
sp|Q15058|KIF14_HUMAN	KIF14_HUMAN	KIF14	31.8638	5.6448	1.71669	4.58154
sp|Q8IX90|SKA3_HUMAN	SKA3_HUMAN	SKA3	9.172	3.02853	1.71347	1.35192
sp|A0FGR8|ESYT2_HUMAN	ESYT2_HUMAN	ESYT2	0.912871	0.955443	1.7128	-3.08245
sp|Q9H467|CUED2_HUMAN	CUED2_HUMAN	CUEDC2	124.957	11.1784	1.71072	1.29419
sp|P61081|UBC12_HUMAN	UBC12_HUMAN	UBE2M	7.40982	2.7221	1.70352	2.78513
sp|Q07960|RHG01_HUMAN	RHG01_HUMAN	ARHGAP1	18.6789	4.32191	1.68919	4.8899
sp|Q9ULE6|PALD_HUMAN	PALD_HUMAN	PALD1	0.6742	0.821097	1.67736	-3.77612
sp|P18124|RL7_HUMAN	RL7_HUMAN	RPL7	182.855	13.5224	1.64779	2.1724
sp|P83731|RL24_HUMAN	RL24_HUMAN	RPL24	5.96696	2.44274	1.64058	1.25651
sp|Q9BSJ8|ESYT1_HUMAN	ESYT1_HUMAN	ESYT1	0.512028	0.715561	1.63427	-3.63637
sp|P62861|RS30_HUMAN	RS30_HUMAN	FAU	3.42669	1.85113	1.6078	-1.59036
sp|O43432|IF4G3_HUMAN	IF4G3_HUMAN	EIF4G3	60.8069	7.79788	1.59292	2.97975
sp|P62424|RL7A_HUMAN	RL7A_HUMAN	RPL7A	142.813	11.9504	1.59242	2.40998
sp|P16615|AT2A2_HUMAN	AT2A2_HUMAN	ATP2A2	2.17534	1.4749	1.58766	-3.86298
sp|Q07020|RL18_HUMAN	RL18_HUMAN	RPL18	17.2415	4.15229	1.57247	2.97363
sp|P05141|ADT2_HUMAN	ADT2_HUMAN	SLC25A5	5.54805	2.35543	1.55102	-1.23135
sp|Q13464|ROCK1_HUMAN	ROCK1_HUMAN	ROCK1	25.5811	5.05777	1.53668	2.73489
sp|Q96AY4|TTC28_HUMAN	TTC28_HUMAN	TTC28	10.0538	3.17077	1.52998	4.26526
sp|P51648|AL3A2_HUMAN	AL3A2_HUMAN	ALDH3A2	3.48228	1.86609	1.52874	-1.13622
sp|Q9HCU5|PREB_HUMAN	PREB_HUMAN	PREB	1.55436	1.24674	1.50669	-2.79842
sp|P46776|RL27A_HUMAN	RL27A_HUMAN	RPL27A	4.86739	2.20622	1.50027	1.26245
sp|Q86VI3|IQGA3_HUMAN	IQGA3_HUMAN	IQGAP3	9.67829	3.11099	1.49289	1.27914
sp|P06493|CDK1_HUMAN	CDK1_HUMAN	CDK1	5.65653	2.37835	1.48773	1.53826
sp|Q9UBF2|COPG2_HUMAN	COPG2_HUMAN	COPG2	0.853913	0.924074	1.45982	-3.23829
sp|Q13509|TBB3_HUMAN	TBB3_HUMAN	TUBB3	0	0	1.453	1.15812
sp|Q9Y285|SYFA_HUMAN	SYFA_HUMAN	FARSA	27.5045	5.24447	1.44398	1.34744
sp|O43491|E41L2_HUMAN	E41L2_HUMAN	EPB41L2	2.57479	1.60461	1.43396	-2.77114
sp|O60343|TBCD4_HUMAN	TBCD4_HUMAN	TBC1D4	8.46603	2.90964	1.43343	2.29491
sp|P15531|NDKA_HUMAN	NDKA_HUMAN	NME1	13.6575	3.69561	1.43329	2.02926
sp|P07900|HS90A_HUMAN	HS90A_HUMAN	HSP90AA1	1.29099	1.13622	1.42733	-3.40318
sp|P11498|PYC_HUMAN	PYC_HUMAN	PC	14.5477	3.81414	1.42394	-1.73714
sp|Q9NQC3|RTN4_HUMAN	RTN4_HUMAN	RTN4	1.00004	1.00002	1.41945	-3.37627
sp|Q9UBM7|DHCR7_HUMAN	DHCR7_HUMAN	DHCR7	0.957469	0.978503	1.38116	-2.80389
sp|Q9NRN7|ADPPT_HUMAN	ADPPT_HUMAN	AASDHPPT	0	0	1.37194	-1.36809
sp|P49792|RBP2_HUMAN	RBP2_HUMAN	RANBP2	1.4764	1.21507	1.36101	-4.09491
sp|P49411|EFTU_HUMAN	EFTU_HUMAN	TUFM	2.42169	1.55618	1.35734	-2.11712
sp|P27816|MAP4_HUMAN	MAP4_HUMAN	MAP4	2.11901	1.45568	1.34259	-3.46703
sp|Q9BXF6|RFIP5_HUMAN	RFIP5_HUMAN	RAB11FIP5	1.87302	1.36858	1.32848	-2.93465
sp|Q7Z589|EMSY_HUMAN	EMSY_HUMAN	EMSY	19.5638	4.4231	1.31904	3.08643
sp|P16403|H12_HUMAN	H12_HUMAN	HIST1H1C	49.9884	7.07025	1.30981	3.29147
sp|O95613|PCNT_HUMAN	PCNT_HUMAN	PCNT	0.973858	0.986842	1.30201	-3.38425
sp|P39019|RS19_HUMAN	RS19_HUMAN	RPS19	2.0355	1.42671	1.30143	1.80524
sp|Q9Y2Z0|SGT1_HUMAN	SGT1_HUMAN	SUGT1	2.27273	1.50756	1.2973	-2.78522
sp|P55011|S12A2_HUMAN	S12A2_HUMAN	SLC12A2	2.38345	1.54384	1.28845	-1.80221
sp|Q9H2J7|S6A15_HUMAN	S6A15_HUMAN	SLC6A15	2.40708	1.55148	1.28214	-1.59841
sp|Q13371|PHLP_HUMAN	PHLP_HUMAN	PDCL	0.585779	0.765362	1.26178	-2.79097
sp|Q8WTT2|NOC3L_HUMAN	NOC3L_HUMAN	NOC3L	2.17113	1.47348	1.26031	-2.76337
sp|P62826|RAN_HUMAN	RAN_HUMAN	RAN	33.0061	5.74509	1.25649	2.24348
sp|Q13642|FHL1_HUMAN	FHL1_HUMAN	FHL1	30.8881	5.55771	1.25405	2.2963
sp|P40616|ARL1_HUMAN	ARL1_HUMAN	ARL1	0	0	1.25222	1.83716
sp|Q1ED39|KNOP1_HUMAN	KNOP1_HUMAN	KNOP1	4.86456	2.20557	1.24704	2.55786
sp|Q6MZP7|LIN54_HUMAN	LIN54_HUMAN	LIN54	13.2838	3.6447	1.24214	1.70555
sp|Q8IZC4|RTKN2_HUMAN	RTKN2_HUMAN	RTKN2	6.02751	2.4551	1.23717	1.1128
sp|P54132|BLM_HUMAN	BLM_HUMAN	BLM	0	0	1.23542	1.13919
sp|Q14137|BOP1_HUMAN	BOP1_HUMAN	BOP1	0.743786	0.86243	1.22215	-2.39458
sp|P55010|IF5_HUMAN	IF5_HUMAN	EIF5	2.2842	1.51136	1.21981	-2.66138
sp|Q9Y5K6|CD2AP_HUMAN	CD2AP_HUMAN	CD2AP	4.83498	2.19886	1.20763	2.86059
sp|P00367|DHE3_HUMAN;sp|P49448|DHE4_HUMAN	DHE3_HUMAN	GLUD1	4.7074	2.16965	1.19284	1.41156
sp|Q9UQN3|CHM2B_HUMAN	CHM2B_HUMAN	CHMP2B	4.50449	2.12238	1.18217	2.46828
sp|Q5SVZ6|ZMYM1_HUMAN	ZMYM1_HUMAN	ZMYM1	2.72034	1.64934	1.17777	-2.92145
sp|O43399|TPD54_HUMAN	TPD54_HUMAN	TPD52L2	0	0	1.17725	1.4486
sp|P05556|ITB1_HUMAN	ITB1_HUMAN	ITGB1	0	0	1.16724	-2.99863
sp|Q99442|SEC62_HUMAN	SEC62_HUMAN	SEC62	4.13489	2.03344	1.16668	-3.34902
sp|Q8TCG1|CIP2A_HUMAN	CIP2A_HUMAN	CIP2A	2.79206	1.67094	1.15999	-2.7671
sp|Q5THJ4|VP13D_HUMAN	VP13D_HUMAN	VPS13D	3.04678	1.7455	1.15932	-3.83137
sp|Q8IWZ8|SUGP1_HUMAN	SUGP1_HUMAN	#N/A	#N/A	#N/A	1.15016	1.09715
sp|Q9UDY2|ZO2_HUMAN	ZO2_HUMAN	TJP2	2.88529	1.69862	1.14916	1.43777
sp|P28288|ABCD3_HUMAN	ABCD3_HUMAN	ABCD3	7.05136	2.65544	1.14698	-1.02349
sp|P60468|SC61B_HUMAN	SC61B_HUMAN	SEC61B	5.10047	2.25842	1.14437	2.35733
sp|Q14C86|GAPD1_HUMAN	GAPD1_HUMAN	GAPVD1	0	0	1.13781	-3.56463
sp|P30876|RPB2_HUMAN	RPB2_HUMAN	POLR2B	0	0	1.12134	-2.54804
sp|P47756|CAPZB_HUMAN	CAPZB_HUMAN	CAPZB	6.95791	2.63779	1.10916	1.22506
sp|Q9HCM4|E41L5_HUMAN	E41L5_HUMAN	EPB41L5	2.15038	1.46642	1.10829	-2.5793
sp|P78344|IF4G2_HUMAN	IF4G2_HUMAN	EIF4G2	0.8593	0.926984	1.10622	-2.96255
sp|P42766|RL35_HUMAN	RL35_HUMAN	RPL35	6.95078	2.63643	1.10452	0.933997
sp|P62244|RS15A_HUMAN	RS15A_HUMAN	RPS15A	4.51165	2.12406	1.10312	2.53996
sp|Q9Y3L5|RAP2C_HUMAN	RAP2C_HUMAN	RAP2C	0	0	1.09715	-1.93972
sp|Q9UJU6|DBNL_HUMAN	DBNL_HUMAN	DBNL	1.22791	1.10811	1.09308	1.21418
sp|Q9Y4W6|AFG32_HUMAN	AFG32_HUMAN	AFG3L2	2.59611	1.61125	1.09126	-2.53121
sp|Q9UNX3|RL26L_HUMAN	RL26L_HUMAN	RPL26L1	4.67789	2.16284	1.09004	-2.79375
sp|P54886|P5CS_HUMAN	P5CS_HUMAN	ALDH18A1	0	0	1.08946	1.26531
sp|Q15431|SYCP1_HUMAN	SYCP1_HUMAN	SYCP1	0	0	1.08895	1.95806
sp|Q04837|SSBP_HUMAN	SSBP_HUMAN	SSBP1	0	0	1.08803	1.56074
sp|Q53H12|AGK_HUMAN	AGK_HUMAN	AGK	1.47846	1.21592	1.08347	-2.40536
sp|Q8TEQ6|GEMI5_HUMAN	GEMI5_HUMAN	GEMIN5	1.07117	1.03497	1.08031	-3.04047
sp|P25398|RS12_HUMAN	RS12_HUMAN	RPS12	2.82631	1.68116	1.08014	1.91126
sp|Q8N5F7|NKAP_HUMAN	NKAP_HUMAN	NKAP	1.74744	1.32191	1.07866	2.07838
sp|Q12983|BNIP3_HUMAN	BNIP3_HUMAN	BNIP3	23.3509	4.83228	1.07565	1.79317
sp|P11142|HSP7C_HUMAN	HSP7C_HUMAN	HSPA8	3.55716	1.88604	1.07422	-2.11698
sp|Q7Z4H7|HAUS6_HUMAN	HAUS6_HUMAN	HAUS6	1.27455	1.12896	1.0682	-3.39793
sp|Q96EV2|RBM33_HUMAN	RBM33_HUMAN	RBM33	6.71478	2.59129	1.05871	1.15689
sp|P15311|EZRI_HUMAN	EZRI_HUMAN	EZR	0	0	1.05718	-1.89994
sp|P53597|SUCA_HUMAN	SUCA_HUMAN	SUCLG1	201.604	14.1987	1.05357	1.57933
sp|P52594|AGFG1_HUMAN	AGFG1_HUMAN	AGFG1	15.6179	3.95195	1.0501	1.95023
sp|Q14739|LBR_HUMAN	LBR_HUMAN	LBR	2.51322	1.58532	1.04695	-2.07059
sp|Q9Y6R0|NUMBL_HUMAN	NUMBL_HUMAN	NUMBL	0	0	1.03183	1.84701
sp|Q5T8D3|ACBD5_HUMAN	ACBD5_HUMAN	ACBD5	0.694926	0.833622	1.02812	-2.44744
sp|Q5VT06|CE350_HUMAN	CE350_HUMAN	CEP350	21.541	4.64123	1.02012	2.37244
sp|Q9C026|TRIM9_HUMAN	TRIM9_HUMAN	TRIM9	0	0	1.0194	0.987903
sp|Q07812|BAX_HUMAN	BAX_HUMAN	BAX	3.85119	1.96244	1.01667	2.53365
sp|Q9NX40|OCAD1_HUMAN	OCAD1_HUMAN	OCIAD1	3.57483	1.89072	1.01427	-1.54877
sp|Q8TEW0|PARD3_HUMAN	PARD3_HUMAN	PARD3	96.2514	9.81078	1.00371	1.20568
sp|Q8IWC1|MA7D3_HUMAN	MA7D3_HUMAN	MAP7D3	7.44954	2.72938	1.00218	2.26431
sp|P23284|PPIB_HUMAN	PPIB_HUMAN	PPIB	2.86746	1.69336	1.00013	1.49563
sp|Q14839|CHD4_HUMAN	CHD4_HUMAN	CHD4	1.96161	1.40058	0.998955	-2.57401
sp|P62937|PPIA_HUMAN	PPIA_HUMAN	PPIA	5.04279	2.24562	0.996962	1.71052
sp|Q9BZF3|OSBL6_HUMAN	OSBL6_HUMAN	OSBPL6	1.03576	1.01772	0.991597	-2.26711
sp|Q8IUD2|RB6I2_HUMAN	RB6I2_HUMAN	ERC1	6.39684	2.5292	0.984928	2.81733
sp|O00483|NDUA4_HUMAN	NDUA4_HUMAN	NDUFA4	20.5723	4.53567	0.958714	1.86005
sp|Q9NZC7|WWOX_HUMAN	WWOX_HUMAN	WWOX	1.60549	1.26708	0.957731	-1.99819
sp|P63173|RL38_HUMAN	RL38_HUMAN	RPL38	4.02327	2.00581	0.957255	2.18902
sp|P35268|RL22_HUMAN	RL22_HUMAN	RPL22	17.4951	4.18272	0.956024	2.18028
sp|Q96JB2|COG3_HUMAN	COG3_HUMAN	COG3	0	0	0.954774	2.62481
sp|O75396|SC22B_HUMAN	SC22B_HUMAN	SEC22B	0	0	0.95376	1.46169
sp|Q9Y6M7|S4A7_HUMAN	S4A7_HUMAN	SLC4A7	0.588811	0.76734	0.949793	-2.56108
sp|Q9P0K7|RAI14_HUMAN	RAI14_HUMAN	RAI14	1.13228	1.06409	0.948917	-2.4794
sp|Q14318|FKBP8_HUMAN	FKBP8_HUMAN	FKBP8	4.05265	2.01312	0.944959	1.6322
sp|Q14008|CKAP5_HUMAN	CKAP5_HUMAN	CKAP5	7.65874	2.76744	0.944931	3.03727
sp|Q9H0A0|NAT10_HUMAN	NAT10_HUMAN	NAT10	2.39134	1.5464	0.942554	-2.45499
sp|O00567|NOP56_HUMAN	NOP56_HUMAN	NOP56	6.47151	2.54392	0.942246	2.60096
sp|Q15643|TRIPB_HUMAN	TRIPB_HUMAN	TRIP11	9.30091	3.04974	0.936073	3.0168
sp|Q96HC4|PDLI5_HUMAN	PDLI5_HUMAN	PDLIM5	4.07241	2.01802	0.935206	2.09317
sp|P49790|NU153_HUMAN	NU153_HUMAN	NUP153	0	0	0.924472	-3.09526
sp|Q9NP64|NO40_HUMAN	NO40_HUMAN	ZCCHC17	70.7691	8.41244	0.92323	1.85278
sp|O75534|CSDE1_HUMAN	CSDE1_HUMAN	CSDE1	1.38959	1.17881	0.921222	-2.79153
sp|Q53EZ4|CEP55_HUMAN	CEP55_HUMAN	CEP55	15.5736	3.94633	0.920759	1.38361
sp|Q8TCU4|ALMS1_HUMAN	ALMS1_HUMAN	ALMS1	8.34102	2.88808	0.917652	2.64811
sp|P78318|IGBP1_HUMAN	IGBP1_HUMAN	IGBP1	4.39505	2.09644	0.914918	1.09422
sp|P46109|CRKL_HUMAN	CRKL_HUMAN	CRKL	3.19439	1.78729	0.914827	-1.59396
sp|P46779|RL28_HUMAN	RL28_HUMAN	RPL28	3.50598	1.87243	0.902977	1.05851
sp|P82094|TMF1_HUMAN	TMF1_HUMAN	TMF1	0.735143	0.857405	0.902039	-2.12984
sp|P62633|CNBP_HUMAN	CNBP_HUMAN	CNBP	0	0	0.901038	0.83378
sp|Q5T3I0|GPTC4_HUMAN	GPTC4_HUMAN	GPATCH4	4.82514	2.19662	0.898203	1.80382
sp|P51570|GALK1_HUMAN	GALK1_HUMAN	GALK1	4.81633	2.19461	0.893329	0.965244
sp|Q9HB21|PKHA1_HUMAN	PKHA1_HUMAN	PLEKHA1	2.69861	1.64275	0.890374	-1.20164
sp|P13861|KAP2_HUMAN	KAP2_HUMAN	PRKAR2A	1.80214	1.34244	0.88773	-2.09069
sp|Q96EY4|TMA16_HUMAN	TMA16_HUMAN	TMA16	7.51539	2.74142	0.886101	2.38135
sp|Q96BY7|ATG2B_HUMAN	ATG2B_HUMAN	ATG2B	0.591127	0.768848	0.877072	-2.67651
sp|Q13428|TCOF_HUMAN	TCOF_HUMAN	TCOF1	9.07883	3.01311	0.87705	0.996376
sp|Q8IVF7|FMNL3_HUMAN	FMNL3_HUMAN	FMNL3	1.32288	1.15016	0.87387	-2.47588
sp|P10599|THIO_HUMAN	THIO_HUMAN	TXN	0	0	0.863922	1.19368
sp|Q12816|TROP_HUMAN	TROP_HUMAN	#N/A	#N/A	#N/A	0.861342	0.705682
sp|Q14126|DSG2_HUMAN	DSG2_HUMAN	DSG2	0	0	0.857103	-1.79905
sp|Q9GZS1|RPA49_HUMAN	RPA49_HUMAN	POLR1E	0	0	0.854333	1.32191
sp|P11171|41_HUMAN	41_HUMAN	EPB41	2.496	1.57987	0.84988	-2.43697
sp|Q9HCK8|CHD8_HUMAN	CHD8_HUMAN	CHD8	1.9344	1.39083	0.848297	-3.22567
sp|Q9Y385|UB2J1_HUMAN	UB2J1_HUMAN	UBE2J1	0.784254	0.885581	0.846307	-1.75242
sp|Q01968|OCRL_HUMAN	OCRL_HUMAN	OCRL	0.718788	0.847814	0.843297	-2.12213
sp|Q9HAD4|WDR41_HUMAN	WDR41_HUMAN	WDR41	0.941599	0.97036	0.839859	-2.2032
sp|Q9Y520|PRC2C_HUMAN	PRC2C_HUMAN	PRRC2C	2.86361	1.69222	0.838524	-2.88868
sp|Q15836|VAMP3_HUMAN	VAMP3_HUMAN	VAMP3	1.12852	1.06232	0.832781	1.73103
sp|P46821|MAP1B_HUMAN	MAP1B_HUMAN	MAP1B	0	0	0.828575	-2.83726
sp|P61313|RL15_HUMAN	RL15_HUMAN	RPL15	0	0	0.826627	1.23833
sp|P63244|RACK1_HUMAN	RACK1_HUMAN	RACK1	8.59497	2.93172	0.824505	1.98654
sp|Q14331|FRG1_HUMAN	FRG1_HUMAN	FRG1	25.2759	5.02752	0.82278	1.88008
sp|Q8TD26|CHD6_HUMAN	CHD6_HUMAN	CHD6	0	0	0.822125	1.0856
sp|P51571|SSRD_HUMAN	SSRD_HUMAN	SSR4	6.82033	2.61158	0.821766	1.03058
sp|P61353|RL27_HUMAN	RL27_HUMAN	RPL27	3.9029	1.97558	0.815331	1.71045
sp|P46783|RS10_HUMAN	RS10_HUMAN	RPS10	4.61854	2.14908	0.794284	0.734911
sp|P63261|ACTG_HUMAN;sp|P60709|ACTB_HUMAN	ACTG_HUMAN	ACTG1	3.33826	1.82709	0.793276	-1.43079
sp|O94906|PRP6_HUMAN	PRP6_HUMAN	PRPF6	0.737854	0.858984	0.793266	-2.37188
sp|P07814|SYEP_HUMAN	SYEP_HUMAN	EPRS	3.34953	1.83017	0.787404	-2.06625
sp|P63241|IF5A1_HUMAN;sp|Q6IS14|IF5AL_HUMAN;sp|Q9GZV4|IF5A2_HUMAN	IF5A1_HUMAN	EIF5A	2.34826	1.5324	0.786725	-1.7961
sp|P07305|H10_HUMAN	H10_HUMAN	H1F0	14.0224	3.74465	0.786437	2.19114
sp|Q8NAN2|MIGA1_HUMAN	MIGA1_HUMAN	MIGA1	3.80925	1.95173	0.774774	2.79513
sp|O75179|ANR17_HUMAN	ANR17_HUMAN	ANKRD17	8.09567	2.84529	0.774757	2.40006
sp|P49207|RL34_HUMAN	RL34_HUMAN	RPL34	3.96689	1.99171	0.771232	0.98438
sp|Q6P3W7|SCYL2_HUMAN	SCYL2_HUMAN	SCYL2	1.09432	1.0461	0.770096	-2.10127
sp|Q9UPS8|ANR26_HUMAN	ANR26_HUMAN	ANKRD26	1.03644	1.01806	0.766952	-2.01916
sp|O75410|TACC1_HUMAN	TACC1_HUMAN	TACC1	0.953463	0.976454	0.766043	-2.50653
sp|Q92997|DVL3_HUMAN	DVL3_HUMAN	DVL3	2.62461	1.62006	0.762863	-1.96473
sp|Q8WWK9|CKAP2_HUMAN	CKAP2_HUMAN	CKAP2	5.42704	2.3296	0.755787	0.80087
sp|Q14683|SMC1A_HUMAN	SMC1A_HUMAN	SMC1A	0.810722	0.900401	0.755579	-2.08457
sp|Q6NSJ2|PHLB3_HUMAN	PHLB3_HUMAN	PHLDB3	27.965	5.28819	0.753184	1.00143
sp|Q9C0D5|TANC1_HUMAN	TANC1_HUMAN	TANC1	2.12183	1.45665	0.752046	-1.70827
sp|Q9NVU7|SDA1_HUMAN	SDA1_HUMAN	SDAD1	1.1535	1.07401	0.750544	-2.67466
sp|P50416|CPT1A_HUMAN	CPT1A_HUMAN	CPT1A	1.70864	1.30715	0.747275	-1.82542
sp|P68133|ACTS_HUMAN;sp|P68032|ACTC_HUMAN;sp|P63267|ACTH_HUMAN;sp|P62736|ACTA_HUMAN	ACTS_HUMAN	#N/A	#N/A	#N/A	0.746765	1.37609
sp|P08708|RS17_HUMAN	RS17_HUMAN	RPS17	1.97963	1.40699	0.73983	1.69734
sp|Q8TEU7|RPGF6_HUMAN	RPGF6_HUMAN	RAPGEF6	1.90489	1.38018	0.732257	-2.04611
sp|Q6Y7W6|GGYF2_HUMAN	GGYF2_HUMAN	GIGYF2	6.43642	2.53701	0.725415	1.8604
sp|O15235|RT12_HUMAN	RT12_HUMAN	MRPS12	0.968939	0.984347	0.724438	-1.86499
sp|Q96ME7|ZN512_HUMAN	ZN512_HUMAN	ZNF512	25.8687	5.08613	0.72397	1.35528
sp|Q96S99|PKHF1_HUMAN	PKHF1_HUMAN	PLEKHF1	2.71241	1.64694	0.722774	1.17681
sp|Q9HCD6|TANC2_HUMAN	TANC2_HUMAN	TANC2	1.3283	1.15252	0.719283	1.43407
sp|Q9H4L5|OSBL3_HUMAN	OSBL3_HUMAN	OSBPL3	0.703552	0.83878	0.717985	-2.04359
sp|Q9UNF1|MAGD2_HUMAN	MAGD2_HUMAN	MAGED2	1.26709	1.12565	0.711971	-1.62389
sp|P49327|FAS_HUMAN	FAS_HUMAN	FASN	8.7981	2.96616	0.70703	-0.961626
sp|P30041|PRDX6_HUMAN	PRDX6_HUMAN	PRDX6	0	0	0.702496	0.818655
sp|Q9UNZ2|NSF1C_HUMAN	NSF1C_HUMAN	NSFL1C	2.17866	1.47603	0.701989	1.21629
sp|P13804|ETFA_HUMAN	ETFA_HUMAN	ETFA	13.9883	3.74009	0.701475	-1.95039
sp|P11532|DMD_HUMAN	DMD_HUMAN	DMD	5.42704	2.3296	0.699959	1.69759
sp|Q92878|RAD50_HUMAN	RAD50_HUMAN	RAD50	1.45073	1.20446	0.697908	-1.91752
sp|Q9BQ48|RM34_HUMAN	RM34_HUMAN	MRPL34	7.11748	2.66786	0.696467	1.68838
sp|Q96HS1|PGAM5_HUMAN	PGAM5_HUMAN	PGAM5	22.6734	4.76166	0.696405	1.13062
sp|O00213|APBB1_HUMAN	APBB1_HUMAN	APBB1	0.893917	0.945472	0.692016	-1.83257
sp|P52306|GDS1_HUMAN	GDS1_HUMAN	RAP1GDS1	0	0	0.689803	-2.87132
sp|Q99755|PI51A_HUMAN	PI51A_HUMAN	PIP5K1A	1.24214	1.11451	0.689303	1.64604
sp|P29597|TYK2_HUMAN	TYK2_HUMAN	TYK2	1.52497	1.2349	0.67573	-1.93927
sp|Q4VCS5|AMOT_HUMAN	AMOT_HUMAN	AMOT	8.41222	2.90038	0.67226	2.57818
sp|P07737|PROF1_HUMAN	PROF1_HUMAN	PFN1	5.26349	2.29423	0.668408	1.56282
sp|P61619|S61A1_HUMAN	S61A1_HUMAN	SEC61A1	6.67276	2.58317	0.668128	1.71682
sp|Q02878|RL6_HUMAN	RL6_HUMAN	RPL6	11.5598	3.39996	0.667893	1.64704
sp|P62249|RS16_HUMAN	RS16_HUMAN	RPS16	5.13862	2.26685	0.665389	0.678567
sp|Q15056|IF4H_HUMAN	IF4H_HUMAN	EIF4H	5.36232	2.31567	0.664477	1.63782
sp|Q9ULM3|YETS2_HUMAN	YETS2_HUMAN	YEATS2	2.66416	1.63223	0.662836	-1.97304
sp|P32780|TF2H1_HUMAN	TF2H1_HUMAN	GTF2H1	1.72038	1.31163	0.658913	-1.21456
sp|Q9Y388|RBMX2_HUMAN	RBMX2_HUMAN	RBMX2	3.21674	1.79353	0.653894	-1.45247
sp|Q9UM54|MYO6_HUMAN	MYO6_HUMAN	MYO6	1.06715	1.03303	0.648686	-1.58185
sp|Q9UH92|MLX_HUMAN	MLX_HUMAN	MLX	67.2025	8.19771	0.638983	0.912612
sp|P62258|1433E_HUMAN	1433E_HUMAN	YWHAE	30.3538	5.50943	0.638548	1.2973
sp|Q9NZ01|TECR_HUMAN	TECR_HUMAN	TECR	0.970006	0.984889	0.635844	-2.0005
sp|Q7Z569|BRAP_HUMAN	BRAP_HUMAN	BRAP	0	0	0.634236	-1.15705
sp|O60664|PLIN3_HUMAN	PLIN3_HUMAN	PLIN3	4.93037	2.22044	0.634006	0.75799
sp|P36873|PP1G_HUMAN;sp|P62136|PP1A_HUMAN	PP1G_HUMAN	PPP1CC	0	0	0.633751	-0.791251
sp|Q99615|DNJC7_HUMAN	DNJC7_HUMAN	DNAJC7	0	0	0.633699	-1.63058
sp|O43592|XPOT_HUMAN	XPOT_HUMAN	XPOT	0.984217	0.992077	0.633091	-1.06635
sp|Q8NC51|PAIRB_HUMAN	PAIRB_HUMAN	SERBP1	3.81067	1.95209	0.63016	1.74021
sp|P26373|RL13_HUMAN	RL13_HUMAN	RPL13	5.46081	2.33684	0.626741	0.719265
sp|Q13283|G3BP1_HUMAN	G3BP1_HUMAN	G3BP1	0	0	0.625975	-1.03786
sp|O95391|SLU7_HUMAN	SLU7_HUMAN	SLU7	2.81109	1.67663	0.625705	1.0004
sp|Q15464|SHB_HUMAN	SHB_HUMAN	#N/A	#N/A	#N/A	0.62509	0.601554
sp|O95478|NSA2_HUMAN	NSA2_HUMAN	NSA2	42.2271	6.49824	0.623461	1.06091
sp|Q8N0Z3|SPICE_HUMAN	SPICE_HUMAN	SPICE1	1.39288	1.1802	0.623365	-1.82848
sp|Q99618|CDCA3_HUMAN	CDCA3_HUMAN	CDCA3	0	0	0.62324	-0.981168
sp|Q9NZ45|CISD1_HUMAN	CISD1_HUMAN	CISD1	2.701	1.64347	0.620274	-1.05778
sp|P31948|STIP1_HUMAN	STIP1_HUMAN	STIP1	1.9627	1.40097	0.619717	-2.19189
sp|Q14677|EPN4_HUMAN	EPN4_HUMAN	CLINT1	3.35769	1.8324	0.618066	1.65376
sp|Q14241|ELOA1_HUMAN	ELOA1_HUMAN	ELOA	1.43361	1.19734	0.617962	-2.02136
sp|Q8IWZ3|ANKH1_HUMAN	ANKH1_HUMAN	ANKHD1	6.6289	2.57466	0.617837	2.51283
sp|O75915|PRAF3_HUMAN	PRAF3_HUMAN	ARL6IP5	0	0	0.614701	-1.46303
sp|P43487|RANG_HUMAN	RANG_HUMAN	RANBP1	12.2755	3.50364	0.60616	2.03309
sp|Q9H2H9|S38A1_HUMAN	S38A1_HUMAN	SLC38A1	0.68313	0.826517	0.60486	-2.22611
sp|P14174|MIF_HUMAN	MIF_HUMAN	MIF	0	0	0.601499	0.718021
sp|Q14980|NUMA1_HUMAN	NUMA1_HUMAN	NUMA1	0.58194	0.76285	0.599953	-1.96996
sp|Q8IZH2|XRN1_HUMAN	XRN1_HUMAN	XRN1	7.00396	2.6465	0.598032	2.16423
sp|Q7Z2W4|ZCCHV_HUMAN	ZCCHV_HUMAN	ZC3HAV1	4.71175	2.17066	0.596729	-1.48235
sp|Q92575|UBXN4_HUMAN	UBXN4_HUMAN	UBXN4	4.34735	2.08503	0.59537	1.05219
sp|Q9NS87|KIF15_HUMAN	KIF15_HUMAN	KIF15	28.1536	5.306	0.59453	0.735435
sp|Q9NYJ8|TAB2_HUMAN	TAB2_HUMAN	TAB2	14.9857	3.87114	0.593168	1.02073
sp|Q9Y490|TLN1_HUMAN	TLN1_HUMAN	TLN1	8.21231	2.86571	0.583915	1.64712
sp|O15173|PGRC2_HUMAN	PGRC2_HUMAN	PGRMC2	4.27007	2.06641	0.581406	-0.692856
sp|P47914|RL29_HUMAN	RL29_HUMAN	RPL29	3.54088	1.88172	0.581403	-0.801012
sp|Q9Y3U8|RL36_HUMAN	RL36_HUMAN	RPL36	3.52769	1.87822	0.577916	0.988771
sp|Q8NBU5|ATAD1_HUMAN	ATAD1_HUMAN	ATAD1	0	0	0.57404	0.682751
sp|P50502|F10A1_HUMAN;sp|Q8NFI4|F10A5_HUMAN;sp|Q8IZP2|ST134_HUMAN	F10A1_HUMAN	ST13	0.961065	0.980339	0.569958	-1.55944
sp|P00338|LDHA_HUMAN	LDHA_HUMAN	LDHA	26.9082	5.18731	0.565272	1.36404
sp|P51572|BAP31_HUMAN	BAP31_HUMAN	BCAP31	3.16497	1.77904	0.564759	1.22695
sp|Q92974|ARHG2_HUMAN	ARHG2_HUMAN	ARHGEF2	38.3606	6.19359	0.56472	1.76081
sp|P05166|PCCB_HUMAN	PCCB_HUMAN	PCCB	3.7281	1.93083	0.564602	1.30469
sp|Q9BWH2|FUND2_HUMAN	FUND2_HUMAN	FUNDC2	2.84636	1.68712	0.561332	0.913927
sp|P46781|RS9_HUMAN	RS9_HUMAN	RPS9	3.68904	1.92069	0.561242	1.4469
sp|P11021|GRP78_HUMAN	GRP78_HUMAN	HSPA5	12.4894	3.53403	0.558752	1.63204
sp|P62304|RUXE_HUMAN	RUXE_HUMAN	SNRPE	3.12065	1.76654	0.558542	1.02142
sp|P62277|RS13_HUMAN	RS13_HUMAN	RPS13	4.85133	2.20257	0.552567	1.53814
sp|P40926|MDHM_HUMAN	MDHM_HUMAN	MDH2	0	0	0.550464	-1.07872
sp|Q8IYU8|MICU2_HUMAN	MICU2_HUMAN	MICU2	2.27305	1.50766	0.54975	-0.957287
sp|P11387|TOP1_HUMAN	TOP1_HUMAN	TOP1	2.20355	1.48444	0.548506	-1.54665
sp|O00443|P3C2A_HUMAN	P3C2A_HUMAN	PIK3C2A	21.6985	4.65816	0.544651	1.7896
sp|Q9H019|MFR1L_HUMAN	MFR1L_HUMAN	MTFR1L	2.78396	1.66852	0.543395	0.839797
sp|Q9UPQ9|TNR6B_HUMAN	TNR6B_HUMAN	TNRC6B	12.1787	3.48981	0.542166	1.02544
sp|Q562F6|SGO2_HUMAN	SGO2_HUMAN	SGO2	9.37753	3.06227	0.541721	1.86494
sp|Q14247|SRC8_HUMAN	SRC8_HUMAN	CTTN	4.78751	2.18804	0.540862	1.2863
sp|Q13596|SNX1_HUMAN	SNX1_HUMAN	SNX1	0.586251	0.76567	0.540229	-1.60157
sp|Q9P2E9|RRBP1_HUMAN	RRBP1_HUMAN	RRBP1	1.43308	1.19711	0.54019	-2.39282
sp|Q9P031|TAP26_HUMAN	TAP26_HUMAN	CCDC59	6.06072	2.46185	0.538303	1.77406
sp|Q3ZCQ8|TIM50_HUMAN	TIM50_HUMAN	TIMM50	1.08896	1.04353	0.535808	-1.23553
sp|Q9H6J7|CK049_HUMAN	CK049_HUMAN	C11orf49	19.0736	4.36733	0.526638	1.03801
sp|Q6P1L8|RM14_HUMAN	RM14_HUMAN	MRPL14	0	0	0.526022	0.628644
sp|Q9NPL8|TIDC1_HUMAN	TIDC1_HUMAN	TIMMDC1	2.94437	1.71592	0.524636	0.712509
sp|P42704|LPPRC_HUMAN	LPPRC_HUMAN	LRPPRC	1.21369	1.10168	0.524599	-1.9452
sp|Q8IXI2|MIRO1_HUMAN	MIRO1_HUMAN	RHOT1	5.75978	2.39995	0.523783	0.882238
sp|Q96CS3|FAF2_HUMAN	FAF2_HUMAN	FAF2	2.59964	1.61234	0.520506	-1.26107
sp|P62913|RL11_HUMAN	RL11_HUMAN	RPL11	2.72052	1.6494	0.513804	0.880587
sp|Q8N9N7|LRC57_HUMAN	LRC57_HUMAN	LRRC57	0	0	0.509139	-0.970183
sp|Q59GN2|R39L5_HUMAN;sp|P62891|RL39_HUMAN	R39L5_HUMAN	RPL39P5	0	0	0.504821	-1.2645
sp|P62910|RL32_HUMAN	RL32_HUMAN	RPL32	3.23122	1.79756	0.50336	1.12583
sp|P15880|RS2_HUMAN	RS2_HUMAN	RPS2	4.57575	2.1391	0.500939	0.842683
sp|Q8N2A8|PLD6_HUMAN	PLD6_HUMAN	PLD6	0	0	0.500579	-0.99339
sp|O94762|RECQ5_HUMAN	RECQ5_HUMAN	#N/A	#N/A	#N/A	0.496746	1.8031
sp|Q5JSL3|DOC11_HUMAN	DOC11_HUMAN	DOCK11	8.52916	2.92047	0.495461	1.69104
sp|Q3YEC7|RABL6_HUMAN	RABL6_HUMAN	RABL6	1.71134	1.30818	0.495303	-1.32958
sp|Q9UHQ9|NB5R1_HUMAN	NB5R1_HUMAN	CYB5R1	4.29903	2.07341	0.494756	1.34984
sp|P40855|PEX19_HUMAN	PEX19_HUMAN	PEX19	1.20678	1.09854	0.492273	-1.32704
sp|Q93045|STMN2_HUMAN	STMN2_HUMAN	STMN2	0	0	0.491178	1.06907
sp|Q96C19|EFHD2_HUMAN	EFHD2_HUMAN	EFHD2	3.82339	1.95535	0.49017	1.27956
sp|P62266|RS23_HUMAN	RS23_HUMAN	RPS23	8.98457	2.99743	0.489278	0.613692
sp|Q5JTH9|RRP12_HUMAN	RRP12_HUMAN	RRP12	7.49282	2.7373	0.482193	-0.571579
sp|O15498|YKT6_HUMAN	YKT6_HUMAN	YKT6	4.68718	2.16499	0.481881	-0.550134
sp|Q8IWJ2|GCC2_HUMAN	GCC2_HUMAN	GCC2	13.5349	3.67897	0.47809	2.13828
sp|Q9Y2X3|NOP58_HUMAN	NOP58_HUMAN	NOP58	3.60706	1.89923	0.474882	1.15016
sp|O75190|DNJB6_HUMAN	DNJB6_HUMAN	DNAJB6	4.70659	2.16947	0.467517	0.937372
sp|Q9BSD7|NTPCR_HUMAN	NTPCR_HUMAN	NTPCR	7.51473	2.7413	0.466588	0.899179
sp|P50851|LRBA_HUMAN	LRBA_HUMAN	LRBA	3.27984	1.81103	0.464868	-1.91216
sp|P25705|ATPA_HUMAN	ATPA_HUMAN	ATP5F1A	3.30894	1.81905	0.464632	1.27087
sp|O43933|PEX1_HUMAN	PEX1_HUMAN	PEX1	1.13159	1.06376	0.464247	-1.39466
sp|Q9Y2U8|MAN1_HUMAN	MAN1_HUMAN	LEMD3	0	0	0.46375	-1.35095
sp|P49257|LMAN1_HUMAN	LMAN1_HUMAN	LMAN1	0	0	0.458773	-1.71498
sp|O14641|DVL2_HUMAN	DVL2_HUMAN	DVL2	2.20774	1.48585	0.453754	-1.03729
sp|P22234|PUR6_HUMAN	PUR6_HUMAN	PAICS	2.3486	1.53251	0.45242	0.712463
sp|Q5JRA6|MIA3_HUMAN	MIA3_HUMAN	MIA3	6.62846	2.57458	0.446761	1.29596
sp|O14617|AP3D1_HUMAN	AP3D1_HUMAN	AP3D1	4.46594	2.11328	0.44665	-0.561619
sp|P60842|IF4A1_HUMAN	IF4A1_HUMAN	EIF4A1	0	0	0.439014	-1.1802
sp|Q9HCL2|GPAT1_HUMAN	GPAT1_HUMAN	GPAM	0.67945	0.824287	0.423234	-1.15089
sp|Q99439|CNN2_HUMAN	CNN2_HUMAN	CNN2	0	0	0.418432	0.942552
sp|P21397|AOFA_HUMAN	AOFA_HUMAN	MAOA	1.22476	1.10669	0.416791	2.05304
sp|P18621|RL17_HUMAN	RL17_HUMAN	RPL17	4.53585	2.12975	0.414565	0.360448
sp|Q7Z6K5|ARPIN_HUMAN	ARPIN_HUMAN	ARPIN	3.75335	1.93736	0.41309	1.29318
sp|P24928|RPB1_HUMAN	RPB1_HUMAN	POLR2A	4.55227	2.13361	0.411455	1.40104
sp|P18583|SON_HUMAN	SON_HUMAN	SON	3.91623	1.97895	0.410024	-0.70468
sp|Q9H5V9|CX056_HUMAN	CX056_HUMAN	CXorf56	2.97723	1.72546	0.407134	1.16089
sp|O75381|PEX14_HUMAN	PEX14_HUMAN	PEX14	4.04319	2.01077	0.404948	1.25833
sp|Q71UM5|RS27L_HUMAN	RS27L_HUMAN	RPS27L	4.83428	2.1987	0.404072	1.5767
sp|Q8WWM7|ATX2L_HUMAN	ATX2L_HUMAN	ATXN2L	1.92364	1.38695	0.403561	-1.17667
sp|Q6ZUT1|CK057_HUMAN	CK057_HUMAN	NKAPD1	2.73527	1.65387	0.403302	-0.846742
sp|O14974|MYPT1_HUMAN	MYPT1_HUMAN	PPP1R12A	0	0	0.401724	0.373797
sp|P22392|NDKB_HUMAN;sp|O60361|NDK8_HUMAN	NDKB_HUMAN	NME2	0	0	0.401401	1.21073
sp|P49757|NUMB_HUMAN	NUMB_HUMAN	NUMB	3.75813	1.93859	0.399385	1.18037
sp|O43396|TXNL1_HUMAN	TXNL1_HUMAN	TXNL1	7.31805	2.70519	0.399056	1.23644
sp|Q9BQG0|MBB1A_HUMAN	MBB1A_HUMAN	MYBBP1A	6.77142	2.6022	0.399002	-0.523132
sp|P25685|DNJB1_HUMAN	DNJB1_HUMAN	DNAJB1	0	0	0.396245	-1.1499
sp|Q8NEN9|PDZD8_HUMAN	PDZD8_HUMAN	PDZD8	2.05535	1.43365	0.395393	-1.42265
sp|Q9UBP9|GULP1_HUMAN	GULP1_HUMAN	GULP1	18.5529	4.30731	0.393589	1.03368
sp|Q13492|PICAL_HUMAN	PICAL_HUMAN	PICALM	6.99679	2.64515	0.393179	0.804242
sp|P27635|RL10_HUMAN	RL10_HUMAN	RPL10	6.41345	2.53248	0.392708	-0.386301
sp|Q15388|TOM20_HUMAN	TOM20_HUMAN	TOMM20	0	0	0.389833	1.12658
sp|P30050|RL12_HUMAN	RL12_HUMAN	RPL12	0	0	0.387676	0.667902
sp|O43169|CYB5B_HUMAN	CYB5B_HUMAN	CYB5B	0.819284	0.905143	0.385694	1.18519
sp|Q13325|IFIT5_HUMAN	IFIT5_HUMAN	IFIT5	1.96124	1.40044	0.3832	-0.798489
sp|Q14157|UBP2L_HUMAN	UBP2L_HUMAN	UBAP2L	3.99832	1.99958	0.382696	1.19047
sp|Q9BZE4|NOG1_HUMAN	NOG1_HUMAN	GTPBP4	2.86108	1.69147	0.381359	-1.39925
sp|Q13085|ACACA_HUMAN	ACACA_HUMAN	ACACA	19.7637	4.44563	0.379044	-0.576613
sp|O75533|SF3B1_HUMAN	SF3B1_HUMAN	SF3B1	0	0	0.376479	-0.822947
sp|P06733|ENOA_HUMAN	ENOA_HUMAN	ENO1	2.41665	1.55456	0.376008	-1.08302
sp|Q9UBC2|EP15R_HUMAN	EP15R_HUMAN	EPS15L1	2.17827	1.4759	0.3753	-1.16125
sp|Q9UPW5|CBPC1_HUMAN	CBPC1_HUMAN	AGTPBP1	4.89388	2.21221	0.375238	0.914376
sp|O15126|SCAM1_HUMAN	SCAM1_HUMAN	SCAMP1	9.61567	3.10091	0.37314	0.965845
sp|P62829|RL23_HUMAN	RL23_HUMAN	RPL23	5.61893	2.37043	0.372951	0.419827
sp|Q5JTC6|AMER1_HUMAN	AMER1_HUMAN	AMER1	0	0	0.372752	-0.40008
sp|Q8N5K1|CISD2_HUMAN	CISD2_HUMAN	CISD2	0.879193	0.937653	0.372285	-1.15007
sp|P25205|MCM3_HUMAN	MCM3_HUMAN	MCM3	1.31305	1.14589	0.371643	-0.905118
sp|Q9NZZ3|CHMP5_HUMAN	CHMP5_HUMAN	CHMP5	0	0	0.370522	0.808464
sp|P08195|4F2_HUMAN	4F2_HUMAN	SLC3A2	4.41865	2.10206	0.364805	-0.553059
sp|Q66PJ3|AR6P4_HUMAN	AR6P4_HUMAN	ARL6IP4	8.26556	2.87499	0.364308	1.17807
sp|O94991|SLIK5_HUMAN	SLIK5_HUMAN	SLITRK5	0.881347	0.938801	0.360238	-1.15512
sp|O95721|SNP29_HUMAN	SNP29_HUMAN	SNAP29	5.0068	2.23759	0.356301	0.940742
sp|Q5VT66|MARC1_HUMAN	MARC1_HUMAN	MARC1	4.16194	2.04008	0.355481	-0.854981
sp|Q9Y450|HBS1L_HUMAN	HBS1L_HUMAN	HBS1L	0.923415	0.960945	0.350911	-1.04835
sp|Q00325|MPCP_HUMAN	MPCP_HUMAN	SLC25A3	3.04782	1.7458	0.349851	-0.662693
sp|Q6UB99|ANR11_HUMAN	ANR11_HUMAN	ANKRD11	8.65127	2.9413	0.347709	1.3587
sp|Q9Y6I9|TX264_HUMAN	TX264_HUMAN	TEX264	1.40693	1.18614	0.346683	-0.890716
sp|Q71U36|TBA1A_HUMAN	TBA1A_HUMAN	TUBA1A	0	0	0.345704	0.710527
sp|Q6PCB5|RSBNL_HUMAN	RSBNL_HUMAN	RSBN1L	1.22324	1.106	0.344409	-0.894893
sp|Q96AG3|S2546_HUMAN	S2546_HUMAN	SLC25A46	1.45509	1.20627	0.343862	-0.853025
sp|Q9HDC5|JPH1_HUMAN	JPH1_HUMAN	JPH1	3.82939	1.95688	0.3423	0.698633
sp|P61927|RL37_HUMAN	RL37_HUMAN	RPL37	15.4668	3.93279	0.341219	0.923432
sp|P50914|RL14_HUMAN	RL14_HUMAN	RPL14	132.523	11.5118	0.337746	0.491757
sp|P05388|RLA0_HUMAN;sp|Q8NHW5|RLA0L_HUMAN	RLA0_HUMAN	RPLP0	0	0	0.337343	0.53783
sp|Q9UGI8|TES_HUMAN	TES_HUMAN	TES	2.80764	1.6756	0.336882	-0.469456
sp|P16333|NCK1_HUMAN	NCK1_HUMAN	NCK1	8.74938	2.95794	0.336457	0.788145
sp|P49069|CAMLG_HUMAN	CAMLG_HUMAN	CAMLG	0	0	0.336116	-0.887963
sp|Q9BZF9|UACA_HUMAN	UACA_HUMAN	UACA	4.98708	2.23318	0.334955	1.09552
sp|P46939|UTRO_HUMAN	UTRO_HUMAN	UTRN	3.40964	1.84652	0.334814	-1.62564
sp|Q9UL25|RAB21_HUMAN	RAB21_HUMAN	RAB21	0	0	0.333947	0.705421
sp|Q96A33|CCD47_HUMAN	CCD47_HUMAN	CCDC47	2.78526	1.66891	0.332687	-1.04253
sp|Q5VUA4|ZN318_HUMAN	ZN318_HUMAN	ZNF318	1.22436	1.10651	0.331715	-0.743755
sp|P12236|ADT3_HUMAN	ADT3_HUMAN	SLC25A6	1.61971	1.27268	0.330692	-0.826175
sp|P38646|GRP75_HUMAN	GRP75_HUMAN	HSPA9	2.9675	1.72264	0.330061	-1.15695
sp|Q9Y5Z9|UBIA1_HUMAN	UBIA1_HUMAN	UBIAD1	0	0	0.327981	0.814091
sp|Q86UB9|TM135_HUMAN	TM135_HUMAN	TMEM135	1.90091	1.37874	0.326824	-0.776311
sp|Q13190|STX5_HUMAN	STX5_HUMAN	STX5	3.19383	1.78713	0.324587	-1.10115
sp|Q96A49|SYAP1_HUMAN	SYAP1_HUMAN	SYAP1	2.08904	1.44535	0.324531	-0.938377
sp|Q13459|MYO9B_HUMAN	MYO9B_HUMAN	MYO9B	4.79237	2.18915	0.321585	1.10139
sp|Q9BTX1|NDC1_HUMAN	NDC1_HUMAN	NDC1	0	0	0.320714	-1.23362
sp|P07355|ANXA2_HUMAN;sp|A6NMY6|AXA2L_HUMAN	ANXA2_HUMAN	ANXA2	1.23761	1.11248	0.316085	-0.805655
sp|Q9NVN8|GNL3L_HUMAN	GNL3L_HUMAN	GNL3L	4.57111	2.13801	0.315599	-0.887586
sp|Q96MW1|CCD43_HUMAN	CCD43_HUMAN	CCDC43	5.70835	2.38921	0.314739	0.894605
sp|Q6P2H3|CEP85_HUMAN	CEP85_HUMAN	CEP85	5.65653	2.37835	0.31431	0.497306
sp|P62753|RS6_HUMAN	RS6_HUMAN	RPS6	7.91534	2.81342	0.313445	0.345386
sp|Q9P035|HACD3_HUMAN	HACD3_HUMAN	HACD3	3.04999	1.74642	0.312831	-0.410448
sp|Q9HB71|CYBP_HUMAN	CYBP_HUMAN	CACYBP	2.95475	1.71894	0.311428	-0.985806
sp|Q9BU76|MMTA2_HUMAN	MMTA2_HUMAN	MMTAG2	4.49755	2.12074	0.311206	0.393461
sp|Q4KMP7|TB10B_HUMAN	TB10B_HUMAN	TBC1D10B	0.800606	0.894766	0.30987	-0.910497
sp|P61254|RL26_HUMAN	RL26_HUMAN	RPL26	7.61171	2.75893	0.308735	0.413403
sp|Q92522|H1X_HUMAN	H1X_HUMAN	H1FX	6.23464	2.49693	0.308665	0.989742
sp|Q9BQ52|RNZ2_HUMAN	RNZ2_HUMAN	ELAC2	0	0	0.308209	0.775414
sp|Q5T6F2|UBAP2_HUMAN	UBAP2_HUMAN	UBAP2	2.0576	1.43443	0.307117	0.92548
sp|Q92667|AKAP1_HUMAN	AKAP1_HUMAN	AKAP1	8.01578	2.83122	0.306966	-0.466983
sp|P00387|NB5R3_HUMAN	NB5R3_HUMAN	CYB5R3	44.1548	6.64491	0.306317	0.539387
sp|Q12923|PTN13_HUMAN	PTN13_HUMAN	PTPN13	6.4653	2.5427	0.304265	1.1054
sp|O94813|SLIT2_HUMAN	SLIT2_HUMAN	SLIT2	2.52981	1.59054	0.303904	-1.0061
sp|P12270|TPR_HUMAN	TPR_HUMAN	TPR	8.92995	2.9883	0.303772	0.855681
sp|Q86UK7|ZN598_HUMAN	ZN598_HUMAN	ZNF598	1.10119	1.04938	0.303429	-0.849347
sp|P07437|TBB5_HUMAN	TBB5_HUMAN	TUBB	6.56159	2.56156	0.301366	0.454891
sp|Q86UE4|LYRIC_HUMAN	LYRIC_HUMAN	MTDH	3.43363	1.85301	0.300034	0.871759
sp|P78310|CXAR_HUMAN	CXAR_HUMAN	CXADR	2.42753	1.55805	0.298182	0.650313
sp|Q15942|ZYX_HUMAN	ZYX_HUMAN	ZYX	0	0	0.296096	0.697372
sp|Q15005|SPCS2_HUMAN	SPCS2_HUMAN	SPCS2	1.36138	1.16678	0.294254	0.577014
sp|Q8NDI1|EHBP1_HUMAN	EHBP1_HUMAN	EHBP1	3.86507	1.96598	0.293245	-0.647619
sp|P18206|VINC_HUMAN	VINC_HUMAN	VCL	0.855939	0.92517	0.29219	-1.19068
sp|Q86SQ0|PHLB2_HUMAN	PHLB2_HUMAN	PHLDB2	2.48494	1.57637	0.290999	-0.899441
sp|P51149|RAB7A_HUMAN	RAB7A_HUMAN	RAB7A	13.5233	3.67741	0.290924	-1.10559
sp|Q8TEV9|SMCR8_HUMAN	SMCR8_HUMAN	SMCR8	2.4791	1.57452	0.289146	-1.16766
sp|O14776|TCRG1_HUMAN	TCRG1_HUMAN	TCERG1	1.27753	1.13028	0.288777	0.71212
sp|Q13439|GOGA4_HUMAN	GOGA4_HUMAN	GOLGA4	8.51614	2.91824	0.284293	1.43838
sp|O00429|DNM1L_HUMAN	DNM1L_HUMAN	DNM1L	7.05178	2.65552	0.280426	0.544759
sp|Q70E73|RAPH1_HUMAN	RAPH1_HUMAN	RAPH1	11.6524	3.41357	0.279536	0.832301
sp|Q15637|SF01_HUMAN	SF01_HUMAN	SF1	0	0	0.278815	0.555997
sp|Q9NS69|TOM22_HUMAN	TOM22_HUMAN	TOMM22	0	0	0.276311	-0.78987
sp|Q3ZCM7|TBB8_HUMAN	TBB8_HUMAN	#N/A	#N/A	#N/A	0.276092	0.790216
sp|P48643|TCPE_HUMAN	TCPE_HUMAN	CCT5	0	0	0.276004	0.694352
sp|Q9Y6B6|SAR1B_HUMAN	SAR1B_HUMAN	SAR1B	1.86984	1.36742	0.27456	0.630276
sp|Q8IXI1|MIRO2_HUMAN	MIRO2_HUMAN	RHOT2	0.788811	0.88815	0.274247	-0.863275
sp|P26641|EF1G_HUMAN	EF1G_HUMAN	EEF1G	13.1829	3.63083	0.273522	0.503909
sp|Q5SW79|CE170_HUMAN	CE170_HUMAN	CEP170	2.14038	1.463	0.270604	-1.15358
sp|P62917|RL8_HUMAN	RL8_HUMAN	RPL8	16.7965	4.09835	0.270495	0.856104
sp|P30519|HMOX2_HUMAN	HMOX2_HUMAN	HMOX2	0	0	0.26848	-0.799048
sp|P21333|FLNA_HUMAN	FLNA_HUMAN	FLNA	11.3868	3.37444	0.268457	-0.743623
sp|Q02040|AK17A_HUMAN	AK17A_HUMAN	AKAP17A	2.8624	1.69186	0.267392	-1.04653
sp|P23396|RS3_HUMAN	RS3_HUMAN	RPS3	4.99974	2.23601	0.267065	0.765407
sp|Q8N350|CBARP_HUMAN	CBARP_HUMAN	CBARP	0	0	0.266796	0.78281
sp|O00571|DDX3X_HUMAN;sp|O15523|DDX3Y_HUMAN	DDX3X_HUMAN	DDX3X	2.8251	1.6808	0.266491	0.942233
sp|Q9NVI7|ATD3A_HUMAN	ATD3A_HUMAN	ATAD3A	3.59924	1.89717	0.265321	0.746673
sp|O95202|LETM1_HUMAN	LETM1_HUMAN	LETM1	2.34354	1.53086	0.265182	-1.01223
sp|P68371|TBB4B_HUMAN	TBB4B_HUMAN	TUBB4B	6.32876	2.5157	0.263828	0.443017
sp|O14966|RAB7L_HUMAN	RAB7L_HUMAN	RAB29	3.29341	1.81478	0.262054	0.668813
sp|P84077|ARF1_HUMAN;sp|P61204|ARF3_HUMAN	ARF1_HUMAN	ARF1	3.17338	1.7814	0.261685	0.529848
sp|Q9Y3C1|NOP16_HUMAN	NOP16_HUMAN	NOP16	1.04417	1.02185	0.259678	-0.763265
sp|Q6WKZ4|RFIP1_HUMAN	RFIP1_HUMAN	RAB11FIP1	3.02394	1.73895	0.258808	-0.858212
sp|P11940|PABP1_HUMAN	PABP1_HUMAN	PABPC1	1.77711	1.33308	0.255687	0.593563
sp|Q9H8Y8|GORS2_HUMAN	GORS2_HUMAN	GORASP2	3.29599	1.81549	0.255185	0.888728
sp|P09211|GSTP1_HUMAN	GSTP1_HUMAN	GSTP1	0	0	0.251753	0.556965
sp|P14625|ENPL_HUMAN	ENPL_HUMAN	HSP90B1	0	0	0.249551	-0.760226
sp|Q14789|GOGB1_HUMAN	GOGB1_HUMAN	GOLGB1	9.07885	3.01311	0.248608	1.06514
sp|P20340|RAB6A_HUMAN	RAB6A_HUMAN	RAB6A	25.4758	5.04736	0.248197	-1.05399
sp|P39023|RL3_HUMAN	RL3_HUMAN	RPL3	17.8865	4.22924	0.247822	0.715903
sp|Q9Y2R4|DDX52_HUMAN	DDX52_HUMAN	DDX52	1.13076	1.06337	0.244688	0.580471
sp|Q86UP2|KTN1_HUMAN	KTN1_HUMAN	KTN1	7.10047	2.66467	0.24375	0.49879
sp|Q9Y4P8|WIPI2_HUMAN	WIPI2_HUMAN	WIPI2	2.19712	1.48227	0.243633	-0.831975
sp|Q8N0V3|RBFA_HUMAN	RBFA_HUMAN	RBFA	1.75798	1.32589	0.2434	0.56127
sp|P62280|RS11_HUMAN	RS11_HUMAN	RPS11	3.59012	1.89476	0.242355	0.778859
sp|O14737|PDCD5_HUMAN	PDCD5_HUMAN	PDCD5	1.59261	1.26199	0.242178	-0.399955
sp|Q8NBA8|DTWD2_HUMAN	DTWD2_HUMAN	DTWD2	124.957	11.1784	0.241386	0.509774
sp|Q6UB35|C1TM_HUMAN	C1TM_HUMAN	MTHFD1L	2.85619	1.69003	0.24065	0.674844
sp|Q8WU79|SMAP2_HUMAN	SMAP2_HUMAN	SMAP2	3.6061	1.89897	0.238904	-0.422737
sp|Q8TB36|GDAP1_HUMAN	GDAP1_HUMAN	GDAP1	3.62599	1.9042	0.238482	0.511372
sp|Q70CQ3|UBP30_HUMAN	UBP30_HUMAN	USP30	3.01618	1.73671	0.238118	0.718086
sp|O95210|STBD1_HUMAN	STBD1_HUMAN	STBD1	2.13694	1.46183	0.235561	-0.569519
sp|Q7Z434|MAVS_HUMAN	MAVS_HUMAN	MAVS	6.16479	2.4829	0.234995	0.363329
sp|Q01650|LAT1_HUMAN	LAT1_HUMAN	SLC7A5	3.69285	1.92168	0.234231	-0.738131
sp|O15063|K0355_HUMAN	K0355_HUMAN	KIAA0355	67.9053	8.24047	0.232984	1.36348
sp|O95487|SC24B_HUMAN	SC24B_HUMAN	SEC24B	0	0	0.231165	-0.718288
sp|Q96P47|AGAP3_HUMAN	AGAP3_HUMAN	AGAP3	2.12291	1.45702	0.229194	-0.685233
sp|P14209|CD99_HUMAN	CD99_HUMAN	CD99	0	0	0.228085	0.332063
sp|P62820|RAB1A_HUMAN	RAB1A_HUMAN	RAB1A	4.87392	2.2077	0.22779	-0.609719
sp|Q9NRY5|F1142_HUMAN	F1142_HUMAN	FAM114A2	7.04285	2.65384	0.227663	0.718659
sp|O95433|AHSA1_HUMAN	AHSA1_HUMAN	AHSA1	8.1285	2.85105	0.227486	-0.585027
sp|Q9NRA8|4ET_HUMAN	4ET_HUMAN	EIF4ENIF1	2.19826	1.48265	0.227375	-0.837706
sp|Q9NX58|LYAR_HUMAN	LYAR_HUMAN	LYAR	7.02729	2.6509	0.226318	-0.389181
sp|Q9H3P7|GCP60_HUMAN	GCP60_HUMAN	ACBD3	2.85715	1.69031	0.226096	-0.799647
sp|Q99879|H2B1M_HUMAN;sp|Q99880|H2B1L_HUMAN;sp|Q99877|H2B1N_HUMAN;sp|Q93079|H2B1H_HUMAN;sp|Q5QNW6|H2B2F_HUMAN;sp|P62807|H2B1C_HUMAN;sp|P58876|H2B1D_HUMAN;sp|P57053|H2BFS_HUMAN;sp|O60814|H2B1K_HUMAN	H2B1M_HUMAN	#N/A	#N/A	#N/A	0.22457	-0.695304
sp|Q96C36|P5CR2_HUMAN	P5CR2_HUMAN	PYCR2	0	0	0.222816	0.282048
sp|O00541|PESC_HUMAN	PESC_HUMAN	PES1	6.07085	2.46391	0.221893	-0.636821
sp|Q2TBE0|C19L2_HUMAN	C19L2_HUMAN	CWF19L2	0	0	0.221883	0.370869
sp|P61247|RS3A_HUMAN	RS3A_HUMAN	RPS3A	4.52801	2.12791	0.221406	0.824769
sp|Q7Z478|DHX29_HUMAN	DHX29_HUMAN	DHX29	0	0	0.221045	-0.801598
sp|O95470|SGPL1_HUMAN	SGPL1_HUMAN	SGPL1	6.08847	2.46748	0.219656	0.799676
sp|P42694|HELZ_HUMAN	HELZ_HUMAN	HELZ	0	0	0.218321	-0.65914
sp|P00167|CYB5_HUMAN	CYB5_HUMAN	CYB5A	0	0	0.217531	0.409091
sp|P62854|RS26_HUMAN;sp|Q5JNZ5|RS26L_HUMAN	RS26_HUMAN	RPS26	3.55716	1.88604	0.215341	-0.299206
sp|P30153|2AAA_HUMAN;sp|P30154|2AAB_HUMAN	2AAA_HUMAN	PPP2R1A	0	0	0.214779	0.315836
sp|P49959|MRE11_HUMAN	MRE11_HUMAN	MRE11	4.53585	2.12975	0.214337	0.488959
sp|Q96EB1|ELP4_HUMAN	ELP4_HUMAN	ELP4	3.21202	1.79221	0.214227	-0.421839
sp|P68363|TBA1B_HUMAN	TBA1B_HUMAN	TUBA1B	6.34726	2.51938	0.213791	-0.202085
sp|O60841|IF2P_HUMAN	IF2P_HUMAN	EIF5B	2.9636	1.72151	0.212759	-0.714507
sp|P46782|RS5_HUMAN	RS5_HUMAN	RPS5	9.47537	3.07821	0.212556	0.700904
sp|P30048|PRDX3_HUMAN	PRDX3_HUMAN	PRDX3	0	0	0.211403	-0.565208
sp|Q07065|CKAP4_HUMAN	CKAP4_HUMAN	CKAP4	5.29727	2.30158	0.209637	0.49928
sp|Q9BRX8|F213A_HUMAN	F213A_HUMAN	FAM213A	0	0	0.206139	-0.334312
sp|Q9NVH0|EXD2_HUMAN	EXD2_HUMAN	EXD2	5.55086	2.35603	0.200587	0.298118
sp|P55196|AFAD_HUMAN	AFAD_HUMAN	AFDN	9.65637	3.10747	0.198666	0.761732
sp|P84098|RL19_HUMAN	RL19_HUMAN	RPL19	8.20643	2.86469	0.197815	-0.231169
sp|Q9NYV4|CDK12_HUMAN	CDK12_HUMAN	CDK12	0	0	0.19776	-0.512672
sp|O95831|AIFM1_HUMAN	AIFM1_HUMAN	AIFM1	0.966696	0.983207	0.197004	-0.4935
sp|P16401|H15_HUMAN	H15_HUMAN	HIST1H1B	0	0	0.196288	0.633245
sp|O75694|NU155_HUMAN	NU155_HUMAN	NUP155	1.48567	1.21888	0.194075	-0.821702
sp|P17480|UBF1_HUMAN	UBF1_HUMAN	UBTF	0	0	0.193006	0.494871
sp|P62701|RS4X_HUMAN	RS4X_HUMAN	RPS4X	4.52083	2.12622	0.191571	0.32876
sp|Q6PKG0|LARP1_HUMAN	LARP1_HUMAN	LARP1	2.82899	1.68196	0.190049	-0.821506
sp|P62263|RS14_HUMAN	RS14_HUMAN	RPS14	2.6183	1.61812	0.18986	0.543823
sp|P48634|PRC2A_HUMAN	PRC2A_HUMAN	PRRC2A	2.19541	1.48169	0.189016	0.462892
sp|Q9NPI1|BRD7_HUMAN	BRD7_HUMAN	BRD7	3.57653	1.89117	0.188356	0.329177
sp|Q9Y5M8|SRPRB_HUMAN	SRPRB_HUMAN	SRPRB	10.9297	3.30602	0.187261	0.676109
sp|P16949|STMN1_HUMAN	STMN1_HUMAN	STMN1	7.94182	2.81812	0.18599	0.553138
sp|P36776|LONM_HUMAN	LONM_HUMAN	LONP1	0	0	0.185478	-0.489212
sp|Q9UL54|TAOK2_HUMAN	TAOK2_HUMAN	TAOK2	2.9275	1.71099	0.185097	-0.653454
sp|P10412|H14_HUMAN	H14_HUMAN	HIST1H1E	13.0192	3.60821	0.184494	0.381446
sp|P61513|RL37A_HUMAN	RL37A_HUMAN	RPL37A	4.63692	2.15335	0.182317	0.483578
sp|Q5JTV8|TOIP1_HUMAN	TOIP1_HUMAN	TOR1AIP1	3.01275	1.73573	0.182239	0.448015
sp|Q9UKK9|NUDT5_HUMAN	NUDT5_HUMAN	NUDT5	2.71241	1.64694	0.179965	0.325901
sp|P60891|PRPS1_HUMAN;sp|P21108|PRPS3_HUMAN;sp|P11908|PRPS2_HUMAN	PRPS1_HUMAN	PRPS1	2.74399	1.6565	0.179911	0.428908
sp|Q8N2F6|ARM10_HUMAN	ARM10_HUMAN	ARMC10	2.89947	1.70278	0.179326	0.597872
sp|O75683|SURF6_HUMAN	SURF6_HUMAN	SURF6	3.28568	1.81264	0.176645	0.763663
sp|E9PRG8|CK098_HUMAN	CK098_HUMAN	C11orf98	3.74064	1.93407	0.173915	-0.478618
sp|P61978|HNRPK_HUMAN	HNRPK_HUMAN	HNRNPK	3.1201	1.76638	0.172228	0.502972
sp|Q9Y217|MTMR6_HUMAN	MTMR6_HUMAN	MTMR6	0	0	0.171907	-0.302143
sp|E9PAV3|NACAM_HUMAN;sp|Q13765|NACA_HUMAN	NACAM_HUMAN	NACA	0	0	0.171147	-0.620803
sp|P18085|ARF4_HUMAN	ARF4_HUMAN	ARF4	100.93	10.0464	0.169572	0.275501
sp|P17987|TCPA_HUMAN	TCPA_HUMAN	TCP1	3.13074	1.76939	0.169562	0.636133
sp|Q99623|PHB2_HUMAN	PHB2_HUMAN	PHB2	0	0	0.167191	0.652819
sp|P12004|PCNA_HUMAN	PCNA_HUMAN	PCNA	3.28667	1.81292	0.164114	0.365751
sp|Q9H3N1|TMX1_HUMAN	TMX1_HUMAN	TMX1	5.31608	2.30566	0.163002	0.701284
sp|Q96AC1|FERM2_HUMAN	FERM2_HUMAN	FERMT2	0	0	0.16224	0.405466
sp|Q15417|CNN3_HUMAN	CNN3_HUMAN	CNN3	2.40807	1.5518	0.161522	-0.554129
sp|Q9UNQ2|DIM1_HUMAN	DIM1_HUMAN	DIMT1	0	0	0.160249	0.295282
sp|Q9UH62|ARMX3_HUMAN	ARMX3_HUMAN	ARMCX3	2.36641	1.53831	0.15679	-0.621376
sp|Q8WY36|BBX_HUMAN	BBX_HUMAN	BBX	1.23603	1.11177	0.155104	-0.589017
sp|Q9Y3T9|NOC2L_HUMAN	NOC2L_HUMAN	NOC2L	2.13359	1.46068	0.15485	-0.359997
sp|P62851|RS25_HUMAN	RS25_HUMAN	RPS25	3.18816	1.78554	0.153447	0.363255
sp|P10809|CH60_HUMAN	CH60_HUMAN	HSPD1	3.1991	1.7886	0.153357	0.509361
sp|Q9GZY8|MFF_HUMAN	MFF_HUMAN	MFF	4.22338	2.05509	0.152407	0.569615
sp|P50990|TCPQ_HUMAN	TCPQ_HUMAN	CCT8	10.3236	3.21304	0.152168	0.293264
sp|Q9H082|RB33B_HUMAN	RB33B_HUMAN	RAB33B	4.43755	2.10655	0.151527	-0.835205
sp|O60762|DPM1_HUMAN	DPM1_HUMAN	DPM1	75.3872	8.68258	0.150672	0.352596
sp|Q99733|NP1L4_HUMAN	NP1L4_HUMAN	NAP1L4	0	0	0.148584	-0.435547
sp|Q9BVP2|GNL3_HUMAN	GNL3_HUMAN	GNL3	9.05013	3.00834	0.148006	0.175418
sp|P06576|ATPB_HUMAN	ATPB_HUMAN	ATP5F1B	3.20041	1.78897	0.147037	-0.347589
sp|Q9BXB4|OSB11_HUMAN	OSB11_HUMAN	OSBPL11	1.20835	1.09925	0.145952	-0.326578
sp|Q96S66|CLCC1_HUMAN	CLCC1_HUMAN	CLCC1	3.93543	1.98379	0.144574	0.602226
sp|Q96JH7|VCIP1_HUMAN	VCIP1_HUMAN	VCPIP1	4.0262	2.00654	0.144283	0.686452
sp|P45880|VDAC2_HUMAN	VDAC2_HUMAN	VDAC2	4.47557	2.11556	0.14405	-0.607607
sp|Q9NP61|ARFG3_HUMAN	ARFG3_HUMAN	ARFGAP3	8.81334	2.96873	0.142844	0.348403
sp|Q15208|STK38_HUMAN	STK38_HUMAN	STK38	3.9531	1.98824	0.142789	0.455601
sp|Q2M2I8|AAK1_HUMAN	AAK1_HUMAN	AAK1	0	0	0.142106	-0.367992
sp|P55209|NP1L1_HUMAN	NP1L1_HUMAN	NAP1L1	0	0	0.141374	-0.461178
sp|Q9H2G2|SLK_HUMAN	SLK_HUMAN	SLK	4.73231	2.17539	0.140848	0.59531
sp|P35579|MYH9_HUMAN	MYH9_HUMAN	MYH9	4.43448	2.10582	0.14022	-0.5241
sp|P14618|KPYM_HUMAN	KPYM_HUMAN	PKM	1.96969	1.40346	0.138407	-0.425932
sp|P11310|ACADM_HUMAN	ACADM_HUMAN	ACADM	4.87281	2.20744	0.13707	0.279362
sp|Q86Y82|STX12_HUMAN	STX12_HUMAN	STX12	0	0	0.133983	0.257699
sp|P51809|VAMP7_HUMAN	VAMP7_HUMAN	VAMP7	2.59845	1.61197	0.133908	-0.252412
sp|Q9HCC0|MCCB_HUMAN	MCCB_HUMAN	MCCC2	2.73219	1.65293	0.131217	0.289044
sp|Q7Z6Z7|HUWE1_HUMAN	HUWE1_HUMAN	HUWE1	1.57013	1.25305	0.130955	-0.581252
sp|Q8IY17|PLPL6_HUMAN	PLPL6_HUMAN	PNPLA6	2.20479	1.48485	0.130954	-0.557781
sp|Q8TBA6|GOGA5_HUMAN	GOGA5_HUMAN	GOLGA5	3.02394	1.73895	0.128986	0.56848
sp|Q92540|SMG7_HUMAN	SMG7_HUMAN	SMG7	0.859232	0.926948	0.128603	0.427385
sp|Q5T280|CI114_HUMAN	CI114_HUMAN	SPOUT1	3.42105	1.84961	0.128542	-0.33085
sp|P10321|1C07_HUMAN;sp|Q31612|1B73_HUMAN;sp|Q29963|1C06_HUMAN;sp|Q29960|1C16_HUMAN;sp|Q07000|1C15_HUMAN;sp|P30508|1C12_HUMAN;sp|P30501|1C02_HUMAN;sp|Q95604|1C17_HUMAN	1C07_HUMAN	#N/A	#N/A	#N/A	0.128315	-0.181402
sp|P56589|PEX3_HUMAN	PEX3_HUMAN	PEX3	1.43563	1.19818	0.127923	0.415994
sp|Q05823|RN5A_HUMAN	RN5A_HUMAN	RNASEL	5.91453	2.43198	0.127475	-0.283917
sp|P33981|TTK_HUMAN	TTK_HUMAN	TTK	2.79715	1.67247	0.127289	0.486961
sp|P43307|SSRA_HUMAN	SSRA_HUMAN	SSR1	2.77451	1.66569	0.126183	0.518826
sp|Q9NR12|PDLI7_HUMAN	PDLI7_HUMAN	PDLIM7	0	0	0.125591	0.244866
sp|O00151|PDLI1_HUMAN	PDLI1_HUMAN	PDLIM1	4.13852	2.03433	0.124019	0.406349
sp|O95817|BAG3_HUMAN	BAG3_HUMAN	BAG3	0	0	0.122303	0.203801
sp|Q8IWS0|PHF6_HUMAN	PHF6_HUMAN	PHF6	3.85887	1.9644	0.120324	-0.452339
sp|Q3SY69|AL1L2_HUMAN	AL1L2_HUMAN	ALDH1L2	0	0	0.119894	-0.445462
sp|P57772|SELB_HUMAN	SELB_HUMAN	EEFSEC	4.28299	2.06954	0.119105	0.4464
sp|O96011|PX11B_HUMAN	PX11B_HUMAN	PEX11B	3.99308	1.99827	0.1178	0.367302
sp|P46108|CRK_HUMAN	CRK_HUMAN	CRK	5.11387	2.26139	0.117442	-0.298073
sp|Q99961|SH3G1_HUMAN	SH3G1_HUMAN	SH3GL1	8.30667	2.88213	0.11609	-0.280506
sp|P09543|CN37_HUMAN	CN37_HUMAN	CNP	2.38787	1.54528	0.114386	-0.270357
sp|Q15758|AAAT_HUMAN	AAAT_HUMAN	SLC1A5	3.40129	1.84426	0.11433	-0.279413
sp|Q9Y613|FHOD1_HUMAN	FHOD1_HUMAN	FHOD1	1.24022	1.11365	0.11395	0.258179
sp|P37802|TAGL2_HUMAN	TAGL2_HUMAN	TAGLN2	3.82449	1.95563	0.113537	0.263055
sp|O43896|KIF1C_HUMAN	KIF1C_HUMAN	KIF1C	6.37988	2.52584	0.111567	0.160758
sp|Q9GZR7|DDX24_HUMAN	DDX24_HUMAN	DDX24	1.39788	1.18232	0.109906	-0.421105
sp|O95372|LYPA2_HUMAN	LYPA2_HUMAN	LYPLA2	2.31423	1.52126	0.108665	0.416242
sp|P50402|EMD_HUMAN	EMD_HUMAN	EMD	3.36521	1.83445	0.108278	0.280793
sp|Q9HCN4|GPN1_HUMAN	GPN1_HUMAN	GPN1	0	0	0.107566	0.180221
sp|Q9Y265|RUVB1_HUMAN	RUVB1_HUMAN	RUVBL1	3.0085	1.7345	0.106633	-0.37953
sp|O15027|SC16A_HUMAN	SC16A_HUMAN	SEC16A	2.33537	1.52819	0.105664	0.365937
sp|Q9Y4W2|LAS1L_HUMAN	LAS1L_HUMAN	LAS1L	1.38123	1.17526	0.105465	-0.257251
sp|O00763|ACACB_HUMAN	ACACB_HUMAN	ACACB	10.1275	3.18238	0.104961	-0.551168
sp|Q92574|TSC1_HUMAN	TSC1_HUMAN	TSC1	9.62785	3.10288	0.10444	0.280603
sp|P63220|RS21_HUMAN	RS21_HUMAN	RPS21	0	0	0.101083	-0.199552
sp|P23588|IF4B_HUMAN	IF4B_HUMAN	EIF4B	2.8902	1.70006	0.100935	-0.316997
sp|Q92841|DDX17_HUMAN	DDX17_HUMAN	DDX17	0	0	0.100214	-0.285008
sp|P60866|RS20_HUMAN	RS20_HUMAN	RPS20	2.39287	1.54689	0.0998915	0.375538
sp|Q14103|HNRPD_HUMAN	HNRPD_HUMAN	HNRNPD	0	0	0.09896	0.18946
sp|Q5JTW2|CEP78_HUMAN	CEP78_HUMAN	CEP78	3.3849	1.83981	0.0985314	0.408002
sp|P98170|XIAP_HUMAN	XIAP_HUMAN	XIAP	22.8491	4.78007	0.0981376	0.182585
sp|O43175|SERA_HUMAN	SERA_HUMAN	PHGDH	2.82429	1.68056	0.0977123	-0.27525
sp|Q969Q0|RL36L_HUMAN	RL36L_HUMAN	RPL36AL	12.3834	3.51901	0.0963661	-0.383063
sp|P42167|LAP2B_HUMAN	LAP2B_HUMAN	TMPO	4.52593	2.12742	0.0962346	0.192997
sp|Q9NWB6|ARGL1_HUMAN	ARGL1_HUMAN	ARGLU1	7.85431	2.80256	0.0919101	0.378023
sp|Q8NG31|KNL1_HUMAN	KNL1_HUMAN	KNL1	7.88206	2.8075	0.0917449	0.424356
sp|Q6P444|MTFR2_HUMAN	MTFR2_HUMAN	MTFR2	3.00381	1.73315	0.091392	-0.261162
sp|Q04637|IF4G1_HUMAN	IF4G1_HUMAN	EIF4G1	4.45814	2.11143	0.0910613	-0.425908
sp|Q9Y383|LC7L2_HUMAN	LC7L2_HUMAN	LUC7L2	1.68153	1.29674	0.0906349	-0.377428
sp|P53365|ARFP2_HUMAN	ARFP2_HUMAN	ARFIP2	0	0	0.0900778	-0.181212
sp|P62979|RS27A_HUMAN;sp|P0CG47|UBB_HUMAN;sp|P0CG48|UBC_HUMAN	RS27A_HUMAN	RPS27A	5.25995	2.29346	0.0886853	-0.0898638
sp|O75400|PR40A_HUMAN	PR40A_HUMAN	PRPF40A	3.68473	1.91957	0.0877828	-0.361535
sp|P84085|ARF5_HUMAN	ARF5_HUMAN	#N/A	#N/A	#N/A	0.087775	0.15336
sp|P51610|HCFC1_HUMAN	HCFC1_HUMAN	HCFC1	4.73096	2.17508	0.0874959	-0.401151
sp|P35240|MERL_HUMAN	MERL_HUMAN	NF2	0	0	0.0873307	-0.136216
sp|P05165|PCCA_HUMAN	PCCA_HUMAN	PCCA	16.6117	4.07575	0.0869834	-0.48478
sp|Q9H501|ESF1_HUMAN	ESF1_HUMAN	ESF1	0	0	0.0859806	0.228395
sp|Q15361|TTF1_HUMAN	TTF1_HUMAN	TTF1	2.83284	1.68311	0.0818227	-0.363789
sp|Q9UPU7|TBD2B_HUMAN	TBD2B_HUMAN	TBC1D2B	1.08904	1.04357	0.0815084	0.22084
sp|P09651|ROA1_HUMAN;sp|Q32P51|RA1L2_HUMAN	ROA1_HUMAN	HNRNPA1	2.25106	1.50035	0.0814054	-0.190315
sp|Q9Y4P3|TBL2_HUMAN	TBL2_HUMAN	TBL2	4.06766	2.01684	0.0811378	0.265983
sp|O75616|ERAL1_HUMAN	ERAL1_HUMAN	ERAL1	3.39848	1.8435	0.0796268	0.184353
sp|P62899|RL31_HUMAN	RL31_HUMAN	RPL31	0	0	0.0790145	-0.188618
sp|Q13586|STIM1_HUMAN	STIM1_HUMAN	STIM1	1.18102	1.08675	0.0789802	-0.327754
sp|Q8TAA9|VANG1_HUMAN	VANG1_HUMAN	VANGL1	0	0	0.0784012	0.228379
sp|P62273|RS29_HUMAN	RS29_HUMAN	RPS29	3.22656	1.79626	0.0781015	0.366137
sp|Q9UGP4|LIMD1_HUMAN	LIMD1_HUMAN	LIMD1	1.54369	1.24245	0.0780679	0.182765
sp|P24752|THIL_HUMAN	THIL_HUMAN	ACAT1	2.16155	1.47022	0.0779556	0.274578
sp|Q9BQA1|MEP50_HUMAN	MEP50_HUMAN	WDR77	8.45427	2.90762	0.077926	-0.218105
sp|P04843|RPN1_HUMAN	RPN1_HUMAN	RPN1	0	0	0.0778976	-0.274071
sp|P68431|H31_HUMAN;sp|Q71DI3|H32_HUMAN;sp|Q16695|H31T_HUMAN;sp|P84243|H33_HUMAN;sp|Q6NXT2|H3C_HUMAN	H31_HUMAN	HIST1H3A	0	0	0.0778576	0.306766
sp|Q14684|RRP1B_HUMAN	RRP1B_HUMAN	RRP1B	6.1563	2.48119	0.0775141	0.153285
sp|Q13162|PRDX4_HUMAN	PRDX4_HUMAN	PRDX4	0	0	0.0773279	0.199319
sp|Q96N67|DOCK7_HUMAN	DOCK7_HUMAN	DOCK7	1.9201	1.38568	0.0772889	-0.492015
sp|Q15311|RBP1_HUMAN	RBP1_HUMAN	RALBP1	2.12508	1.45776	0.0771499	0.298957
sp|Q9NPG3|UBN1_HUMAN	UBN1_HUMAN	UBN1	0	0	0.0771075	0.138532
sp|P23528|COF1_HUMAN	COF1_HUMAN	CFL1	10.1809	3.19076	0.0767425	0.258323
sp|P61758|PFD3_HUMAN	PFD3_HUMAN	VBP1	0	0	0.0759584	0.179626
sp|Q9NQT8|KI13B_HUMAN	KI13B_HUMAN	KIF13B	0	0	0.0758434	0.117399
sp|Q9Y5V3|MAGD1_HUMAN	MAGD1_HUMAN	MAGED1	1.18801	1.08996	0.0745707	0.143038
sp|Q15233|NONO_HUMAN	NONO_HUMAN	NONO	1.28695	1.13444	0.0744072	-0.280118
sp|Q9BYG3|MK67I_HUMAN	MK67I_HUMAN	NIFK	0	0	0.0743599	0.118138
sp|Q14674|ESPL1_HUMAN	ESPL1_HUMAN	ESPL1	0	0	0.0724236	0.204491
sp|P53804|TTC3_HUMAN	TTC3_HUMAN	TTC3	6.29113	2.50821	0.0724006	0.282301
sp|Q9H425|CA198_HUMAN	CA198_HUMAN	C1orf198	4.10406	2.02585	0.0721787	0.123651
sp|P46778|RL21_HUMAN	RL21_HUMAN	RPL21	2.73682	1.65433	0.0719736	0.264012
sp|P27348|1433T_HUMAN	1433T_HUMAN	YWHAQ	1.89666	1.37719	0.0713765	0.124322
sp|Q99878|H2A1J_HUMAN;sp|Q96KK5|H2A1H_HUMAN;sp|Q9BTM1|H2AJ_HUMAN;sp|Q16777|H2A2C_HUMAN;sp|Q93077|H2A1C_HUMAN;sp|Q7L7L0|H2A3_HUMAN;sp|Q6FI13|H2A2A_HUMAN;sp|P20671|H2A1D_HUMAN;sp|P0C0S8|H2A1_HUMAN;sp|P04908|H2A1B_HUMAN;sp|Q71UI9|H2AV_HUMAN;sp|P0C0S5|H2AZ_HUMAN;sp|Q96QV6|H2A1A_HUMAN;sp|P16104|H2AX_HUMAN	H2A1J_HUMAN	HIST1H2AJ	0	0	0.0688957	0.215184
sp|Q06830|PRDX1_HUMAN	PRDX1_HUMAN	PRDX1	3.00176	1.73256	0.0671121	-0.115265
sp|O14683|P5I11_HUMAN	P5I11_HUMAN	TP53I11	0	0	0.0650903	0.19606
sp|O15085|ARHGB_HUMAN	ARHGB_HUMAN	ARHGEF11	2.30587	1.51851	0.0650441	0.196217
sp|Q15382|RHEB_HUMAN	RHEB_HUMAN	RHEB	2.58035	1.60635	0.0644824	-0.38639
sp|Q9UPQ3|AGAP1_HUMAN	AGAP1_HUMAN	AGAP1	3.31243	1.82001	0.0636034	-0.244922
sp|P07195|LDHB_HUMAN	LDHB_HUMAN	LDHB	1.70699	1.30652	0.0624972	-0.215403
sp|P42566|EPS15_HUMAN	EPS15_HUMAN	EPS15	3.62255	1.9033	0.0622964	-0.228701
sp|Q8N0X7|SPG20_HUMAN	SPG20_HUMAN	SPART	2.64539	1.62647	0.0620568	-0.212378
sp|Q15390|MTFR1_HUMAN	MTFR1_HUMAN	MTFR1	1.17724	1.08501	0.0619082	0.220947
sp|P62081|RS7_HUMAN	RS7_HUMAN	RPS7	0	0	0.0616468	0.117061
sp|Q8WUX9|CHMP7_HUMAN	CHMP7_HUMAN	CHMP7	1.11904	1.05785	0.0612575	0.158522
sp|Q02952|AKA12_HUMAN	AKA12_HUMAN	AKAP12	2.99303	1.73004	0.0610931	0.303566
sp|Q96QD8|S38A2_HUMAN	S38A2_HUMAN	SLC38A2	1.08691	1.04255	0.058821	-0.237976
sp|Q8WW12|PCNP_HUMAN	PCNP_HUMAN	PCNP	1.64566	1.28283	0.0559754	0.160394
sp|Q9UHD8|SEPT9_HUMAN	SEPT9_HUMAN	SEPTIN9	1.73016	1.31535	0.0554696	0.125259
sp|P51587|BRCA2_HUMAN	BRCA2_HUMAN	BRCA2	0	0	0.0546932	0.147334
sp|O75691|UTP20_HUMAN	UTP20_HUMAN	UTP20	5.81705	2.41186	0.0539126	0.222671
sp|Q00341|VIGLN_HUMAN	VIGLN_HUMAN	HDLBP	4.33343	2.08169	0.053822	-0.269602
sp|Q9BR76|COR1B_HUMAN	COR1B_HUMAN	CORO1B	2.84283	1.68607	0.0537757	-0.164828
sp|Q7Z6J0|SH3R1_HUMAN	SH3R1_HUMAN	SH3RF1	3.4526	1.85812	0.0537332	0.118582
sp|Q09666|AHNK_HUMAN	AHNK_HUMAN	AHNAK	7.22603	2.68813	0.0525022	-0.226959
sp|P51617|IRAK1_HUMAN	IRAK1_HUMAN	IRAK1	4.22631	2.0558	0.0521512	0.180186
sp|Q9BW92|SYTM_HUMAN	SYTM_HUMAN	TARS2	10.5434	3.24706	0.0521043	0.177999
sp|Q5SY16|NOL9_HUMAN	NOL9_HUMAN	NOL9	0	0	0.0518253	0.107572
sp|Q9NWT8|AKIP_HUMAN	AKIP_HUMAN	AURKAIP1	0	0	0.0513328	-0.227921
sp|P53367|ARFP1_HUMAN	ARFP1_HUMAN	ARFIP1	2.86243	1.69187	0.0508453	0.123986
sp|P62241|RS8_HUMAN	RS8_HUMAN	RPS8	4.64759	2.15583	0.0501698	0.0677712
sp|O75116|ROCK2_HUMAN	ROCK2_HUMAN	ROCK2	2.33045	1.52658	0.0490384	0.165927
sp|P52565|GDIR1_HUMAN	GDIR1_HUMAN	#N/A	#N/A	#N/A	0.0477253	0.0805836
sp|Q9Y5X1|SNX9_HUMAN	SNX9_HUMAN	SNX9	1.64894	1.28411	0.0467308	0.180693
sp|P35613|BASI_HUMAN	BASI_HUMAN	BSG	1.37417	1.17225	0.0457923	0.181329
sp|P04075|ALDOA_HUMAN	ALDOA_HUMAN	ALDOA	0	0	0.0456576	0.153413
sp|P36542|ATPG_HUMAN	ATPG_HUMAN	ATP5F1C	3.93737	1.98428	0.0456191	-0.163413
sp|Q9UG63|ABCF2_HUMAN	ABCF2_HUMAN	ABCF2	1.20287	1.09676	0.0448431	0.18869
sp|P78527|PRKDC_HUMAN	PRKDC_HUMAN	PRKDC	6.98301	2.64254	0.0437341	0.137743
sp|B2RTY4|MYO9A_HUMAN	MYO9A_HUMAN	MYO9A	7.50501	2.73953	0.0431178	0.16459
sp|Q92968|PEX13_HUMAN	PEX13_HUMAN	PEX13	4.57392	2.13867	0.0431065	-0.119471
sp|Q96EX3|WDR34_HUMAN	WDR34_HUMAN	WDR34	3.01316	1.73585	0.0429103	0.106102
sp|Q969Z3|MARC2_HUMAN	MARC2_HUMAN	MARC2	4.7826	2.18692	0.0416298	0.118082
sp|Q96R06|SPAG5_HUMAN	SPAG5_HUMAN	SPAG5	1.3938	1.18059	0.0403729	0.140239
sp|Q8IYB5|SMAP1_HUMAN	SMAP1_HUMAN	SMAP1	0	0	0.0397845	-0.120342
sp|Q9NQG6|MID51_HUMAN	MID51_HUMAN	MIEF1	4.59234	2.14297	0.0390936	-0.125054
sp|P36578|RL4_HUMAN	RL4_HUMAN	RPL4	13.9916	3.74054	0.0376231	0.129001
sp|P81605|DCD_HUMAN	DCD_HUMAN	DCD	1.46972	1.21232	0.0362476	-0.124424
sp|P83881|RL36A_HUMAN	RL36A_HUMAN	RPL36A	12.1427	3.48464	0.0361694	-0.054127
sp|Q9H444|CHM4B_HUMAN	CHM4B_HUMAN	CHMP4B	0	0	0.0355881	-0.0977372
sp|Q9GZT9|EGLN1_HUMAN	EGLN1_HUMAN	EGLN1	2.35588	1.53489	0.0345847	0.0865409
sp|P11717|MPRI_HUMAN	MPRI_HUMAN	IGF2R	3.85295	1.96289	0.0337769	0.147678
sp|Q9ULH7|MKL2_HUMAN	MKL2_HUMAN	MRTFB	3.33743	1.82686	0.0328458	-0.13818
sp|P29966|MARCS_HUMAN	MARCS_HUMAN	MARCKS	1.04367	1.0216	0.0325937	-0.107455
sp|P51970|NDUA8_HUMAN	NDUA8_HUMAN	NDUFA8	3.98403	1.996	0.0319575	0.0623689
sp|O75431|MTX2_HUMAN	MTX2_HUMAN	MTX2	3.32236	1.82273	0.0310885	-0.0850726
sp|Q8N511|TM199_HUMAN	TM199_HUMAN	TMEM199	2.54112	1.59409	0.0299873	-0.0686847
sp|P61026|RAB10_HUMAN	RAB10_HUMAN	RAB10	0	0	0.0296323	-0.146642
sp|P49368|TCPG_HUMAN	TCPG_HUMAN	CCT3	0	0	0.0291376	0.0884525
sp|Q9NVP1|DDX18_HUMAN	DDX18_HUMAN	DDX18	1.49696	1.2235	0.0290064	-0.135708
sp|P56182|RRP1_HUMAN	RRP1_HUMAN	RRP1	3.14051	1.77215	0.0285899	-0.106728
sp|P35030|TRY3_HUMAN	TRY3_HUMAN	PRSS3	0	0	0.027548	0.11901
sp|Q9BVC6|TM109_HUMAN	TM109_HUMAN	TMEM109	0	0	0.0274872	-0.0618686
sp|Q9ULC3|RAB23_HUMAN	RAB23_HUMAN	RAB23	0	0	0.0268708	-0.0473606
sp|P06748|NPM_HUMAN	NPM_HUMAN	NPM1	1.21171	1.10078	0.0267308	0.108636
sp|Q5SQN1|SNP47_HUMAN	SNP47_HUMAN	SNAP47	2.32028	1.52324	0.0267222	-0.0808479
sp|Q9UJV9|DDX41_HUMAN	DDX41_HUMAN	DDX41	1.81614	1.34764	0.0266678	-0.0763065
sp|P84157|MXRA7_HUMAN	MXRA7_HUMAN	MXRA7	3.08937	1.75766	0.0263617	0.0788986
sp|P49006|MRP_HUMAN	MRP_HUMAN	MARCKSL1	2.39663	1.54811	0.025439	0.0663911
sp|Q8N6T3|ARFG1_HUMAN	ARFG1_HUMAN	ARFGAP1	2.01016	1.4178	0.0254029	-0.0920657
sp|O95292|VAPB_HUMAN	VAPB_HUMAN	VAPB	3.28532	1.81255	0.02519	-0.0888141
sp|O14654|IRS4_HUMAN	IRS4_HUMAN	IRS4	6.11334	2.47252	0.0251752	0.131563
sp|Q92609|TBCD5_HUMAN	TBCD5_HUMAN	TBC1D5	45.7211	6.76174	0.0229136	-0.0471111
sp|O00264|PGRC1_HUMAN	PGRC1_HUMAN	PGRMC1	2.51161	1.58481	0.0219091	0.081081
sp|P42224|STAT1_HUMAN	STAT1_HUMAN	STAT1	0	0	0.0206468	0.0532248
sp|Q6ZSZ5|ARHGI_HUMAN	ARHGI_HUMAN	ARHGEF18	0	0	0.0193235	-0.0641795
sp|Q8IZA0|K319L_HUMAN	K319L_HUMAN	KIAA0319L	5.93865	2.43693	0.0186752	0.0594024
sp|Q15907|RB11B_HUMAN	RB11B_HUMAN	RAB11B	11.3492	3.36885	0.0157438	0.0921242
sp|Q9Y5A9|YTHD2_HUMAN	YTHD2_HUMAN	YTHDF2	1.40643	1.18593	0.0157203	0.0457843
sp|Q5HYI7|MTX3_HUMAN	MTX3_HUMAN	MTX3	4.40815	2.09956	0.0156248	0.0612386
sp|Q9Y2W6|TDRKH_HUMAN	TDRKH_HUMAN	TDRKH	4.39348	2.09606	0.0135277	0.0249005
sp|O95861|BPNT1_HUMAN	BPNT1_HUMAN	BPNT1	0	0	0.0131589	-0.0389947
sp|Q6FI81|CPIN1_HUMAN	CPIN1_HUMAN	CIAPIN1	1.06617	1.03255	0.0116443	-0.0342102
sp|Q05682|CALD1_HUMAN	CALD1_HUMAN	CALD1	2.03099	1.42513	0.0114492	0.0438977
sp|Q5HYI8|RABL3_HUMAN	RABL3_HUMAN	RABL3	3.38723	1.84044	0.0104877	0.0429072
sp|P62750|RL23A_HUMAN	RL23A_HUMAN	RPL23A	4.22314	2.05503	0.00941635	0.0136046
sp|P62269|RS18_HUMAN	RS18_HUMAN	RPS18	2.98883	1.72882	0.00916677	-0.0308245
sp|Q96GQ7|DDX27_HUMAN	DDX27_HUMAN	DDX27	1.73091	1.31564	0.0090251	-0.039237
sp|Q96AG4|LRC59_HUMAN	LRC59_HUMAN	LRRC59	2.83816	1.68468	0.00896748	-0.0237245
sp|Q9BRS2|RIOK1_HUMAN	RIOK1_HUMAN	RIOK1	3.55416	1.88525	0.00846562	-0.0203343
sp|Q7Z401|MYCPP_HUMAN	MYCPP_HUMAN	DENND4A	0	0	0.00836744	0.0167914
sp|P52429|DGKE_HUMAN	DGKE_HUMAN	DGKE	0	0	0.00818607	-0.0202884
sp|Q96RQ3|MCCA_HUMAN	MCCA_HUMAN	MCCC1	8.70444	2.95033	0.00808633	-0.0305285
sp|Q8TEP8|CE192_HUMAN	CE192_HUMAN	CEP192	1.79934	1.34139	0.00753938	0.0400666
sp|Q9NV70|EXOC1_HUMAN	EXOC1_HUMAN	EXOC1	0	0	0.00599289	-0.0176035
sp|P04406|G3P_HUMAN	G3P_HUMAN	GAPDH	4.79989	2.19087	0.00591038	0.0239504
sp|O14531|DPYL4_HUMAN	DPYL4_HUMAN	DPYSL4	0	0	0.00369379	-0.00877985
sp|O75663|TIPRL_HUMAN	TIPRL_HUMAN	TIPRL	2.75196	1.6589	0.00339569	-0.0125316

## Sheet: Rac1del SN
Majority protein IDs	Uniprot	Gene NAME	WD score	Root WD score	Log Student's T-test p-value Rac dCT SN	Student's T-test Difference Rac dCT SN
sp|Q14185|DOCK1_HUMAN	DOCK1_HUMAN	DOCK1	17210.6	131.189	30.0052	10.221
sp|Q9H7D0|DOCK5_HUMAN	DOCK5_HUMAN	DOCK5	16704	129.244	22.778	8.91672
sp|Q8N1I0|DOCK4_HUMAN	DOCK4_HUMAN	DOCK4	15434.5	124.236	18.58	7.67661
sp|P63000|RAC1_HUMAN;sp|P60763|RAC3_HUMAN;sp|P15153|RAC2_HUMAN	RAC1_HUMAN	RAC1	8369.07	91.4826	13.2883	14.3733
sp|Q4KMZ1|IQCC_HUMAN	IQCC_HUMAN	#N/A	#N/A	#N/A	10.3911	7.01567
sp|Q96HP0|DOCK6_HUMAN	DOCK6_HUMAN	DOCK6	4544.87	67.4157	6.88724	8.66341
sp|O15056|SYNJ2_HUMAN	SYNJ2_HUMAN	SYNJ2	148.582	12.1894	6.50081	4.28364
sp|Q9H4A5|GLP3L_HUMAN	GLP3L_HUMAN	GOLPH3L	15.9197	3.98995	5.88587	3.69118
sp|Q9H4A6|GOLP3_HUMAN	GOLP3_HUMAN	GOLPH3	327.012	18.0835	5.63162	4.64966
sp|A7KAX9|RHG32_HUMAN	RHG32_HUMAN	ARHGAP32	227.705	15.0899	5.1251	5.19558
sp|Q96N67|DOCK7_HUMAN	DOCK7_HUMAN	DOCK7	182.59	13.5126	5.11592	9.6493
sp|P11274|BCR_HUMAN	BCR_HUMAN	BCR	35.8103	5.98417	4.52833	6.16059
sp|P11310|ACADM_HUMAN	ACADM_HUMAN	ACADM	75.5538	8.69217	4.41592	2.94248
sp|Q00325|MPCP_HUMAN	MPCP_HUMAN	SLC25A3	2.45181	1.56582	4.27018	-3.39859
sp|P42677|RS27_HUMAN	RS27_HUMAN	RPS27	4.82793	2.19726	4.19367	2.65869
sp|Q9H0P0|5NT3A_HUMAN	5NT3A_HUMAN	NT5C3A	247.936	15.746	4.10977	1.91398
sp|P53365|ARFP2_HUMAN	ARFP2_HUMAN	ARFIP2	300.395	17.3319	4.09367	2.83483
sp|P51570|GALK1_HUMAN	GALK1_HUMAN	GALK1	127.013	11.27	4.01837	2.23382
sp|P63220|RS21_HUMAN	RS21_HUMAN	RPS21	0	0	3.68077	2.20389
sp|P16152|CBR1_HUMAN	CBR1_HUMAN	CBR1	202.662	14.2359	3.65271	5.56086
sp|Q9Y2L9|LRCH1_HUMAN	LRCH1_HUMAN	LRCH1	315.242	17.755	3.542	2.50498
sp|Q9NPG3|UBN1_HUMAN	UBN1_HUMAN	UBN1	230.035	15.1669	3.5331	2.3156
sp|Q6P2H3|CEP85_HUMAN	CEP85_HUMAN	CEP85	4.61854	2.14908	3.41468	2.43324
sp|Q96JB2|COG3_HUMAN	COG3_HUMAN	COG3	0	0	3.31501	5.19695
sp|Q9NX58|LYAR_HUMAN	LYAR_HUMAN	LYAR	9.43899	3.07229	3.14569	2.15294
sp|Q92947|GCDH_HUMAN	GCDH_HUMAN	GCDH	118.604	10.8905	3.14327	1.94105
sp|P49458|SRP09_HUMAN	SRP09_HUMAN	SRP9	289.582	17.0171	2.99218	2.87224
sp|Q9NRY5|F1142_HUMAN	F1142_HUMAN	FAM114A2	9.48235	3.07934	2.96633	4.31898
sp|Q96II8|LRCH3_HUMAN	LRCH3_HUMAN	LRCH3	203.713	14.2728	2.947	3.76413
sp|Q8NBU5|ATAD1_HUMAN	ATAD1_HUMAN	ATAD1	4.01492	2.00373	2.90224	1.95714
sp|Q8IWE2|NXP20_HUMAN	NXP20_HUMAN	FAM114A1	281.129	16.7669	2.72937	2.8368
sp|P83731|RL24_HUMAN	RL24_HUMAN	RPL24	5.66856	2.38087	2.70539	1.59574
sp|Q96L33|RHOV_HUMAN;sp|Q7L0Q8|RHOU_HUMAN	RHOV_HUMAN	#N/A	#N/A	#N/A	2.65856	2.31467
sp|Q7L804|RFIP2_HUMAN	RFIP2_HUMAN	RAB11FIP2	15.2314	3.90274	2.64807	3.49897
sp|Q71UM5|RS27L_HUMAN	RS27L_HUMAN	RPS27L	6.24103	2.49821	2.56572	5.37208
sp|Q9UBP9|GULP1_HUMAN	GULP1_HUMAN	GULP1	21.4626	4.63277	2.54257	3.34074
sp|Q9H444|CHM4B_HUMAN	CHM4B_HUMAN	CHMP4B	424.148	20.5949	2.48692	3.13845
sp|P35240|MERL_HUMAN	MERL_HUMAN	NF2	6.80416	2.60848	2.4716	1.9666
sp|Q9NPI1|BRD7_HUMAN	BRD7_HUMAN	BRD7	66.467	8.15273	2.44833	1.80497
sp|Q9NP61|ARFG3_HUMAN	ARFG3_HUMAN	ARFGAP3	37.033	6.08547	2.44161	2.89784
sp|Q8IYB5|SMAP1_HUMAN	SMAP1_HUMAN	SMAP1	0	0	2.42094	2.97605
sp|Q96C57|CL043_HUMAN	CL043_HUMAN	CUSTOS	56.9057	7.54358	2.41734	2.9558
sp|P0DMV9|HS71B_HUMAN;sp|P0DMV8|HS71A_HUMAN	HS71B_HUMAN	HSPA1B	0	0	2.35461	-2.52981
sp|Q5T280|CI114_HUMAN	CI114_HUMAN	SPOUT1	54.8377	7.40525	2.26943	2.5984
sp|Q92616|GCN1_HUMAN	GCN1_HUMAN	GCN1	1.70136	1.30436	2.233	-4.01322
sp|Q96A33|CCD47_HUMAN	CCD47_HUMAN	CCDC47	2.49907	1.58084	2.2164	-3.81393
sp|Q07960|RHG01_HUMAN	RHG01_HUMAN	ARHGAP1	17.2235	4.15012	2.19821	5.43228
sp|Q9H425|CA198_HUMAN	CA198_HUMAN	C1orf198	52.9934	7.27966	2.17397	1.75155
sp|P08865|RSSA_HUMAN	RSSA_HUMAN	RPSA	3.26672	1.80741	2.14822	2.14646
sp|O95831|AIFM1_HUMAN	AIFM1_HUMAN	AIFM1	20.9206	4.57391	2.12709	2.67144
sp|Q8N0V3|RBFA_HUMAN	RBFA_HUMAN	RBFA	19.6373	4.4314	2.04626	2.62585
sp|O75683|SURF6_HUMAN	SURF6_HUMAN	SURF6	6.31484	2.51293	2.03808	4.30497
sp|P00167|CYB5_HUMAN	CYB5_HUMAN	CYB5A	0	0	2.0161	1.95159
sp|Q8ND24|RN214_HUMAN	RN214_HUMAN	RNF214	60.4448	7.77463	2.01566	1.64504
sp|Q9H501|ESF1_HUMAN	ESF1_HUMAN	ESF1	0	0	1.99458	2.68254
sp|Q5VUJ6|LRCH2_HUMAN	LRCH2_HUMAN	LRCH2	167.657	12.9482	1.97072	2.70777
sp|Q9BRS2|RIOK1_HUMAN	RIOK1_HUMAN	RIOK1	3.43203	1.85257	1.96021	-2.2687
sp|Q9HB71|CYBP_HUMAN	CYBP_HUMAN	CACYBP	0.732392	0.855799	1.93362	-3.53604
sp|Q9NR12|PDLI7_HUMAN	PDLI7_HUMAN	PDLIM7	275.725	16.605	1.86395	1.81668
sp|Q96RL7|VP13A_HUMAN	VP13A_HUMAN	VPS13A	0.694687	0.833479	1.8632	-4.3524
sp|Q7Z6J0|SH3R1_HUMAN	SH3R1_HUMAN	SH3RF1	30.9703	5.5651	1.84199	1.93504
sp|P48735|IDHP_HUMAN	IDHP_HUMAN	IDH2	98.806	9.94012	1.83374	1.65409
sp|P17066|HSP76_HUMAN	HSP76_HUMAN	HSPA6	0	0	1.83023	-2.24271
sp|Q9BSD7|NTPCR_HUMAN	NTPCR_HUMAN	NTPCR	7.51473	2.7413	1.8146	2.18541
sp|Q96RQ3|MCCA_HUMAN	MCCA_HUMAN	MCCC1	7.04306	2.65388	1.77964	-3.25893
sp|Q9H8G2|CAAP1_HUMAN	CAAP1_HUMAN	CAAP1	78.7916	8.87646	1.76276	2.2987
sp|P50479|PDLI4_HUMAN	PDLI4_HUMAN	PDLIM4	183.538	13.5476	1.74283	2.63309
sp|Q1ED39|KNOP1_HUMAN	KNOP1_HUMAN	KNOP1	5.40468	2.3248	1.70313	2.95737
sp|P60468|SC61B_HUMAN	SC61B_HUMAN	SEC61B	11.5109	3.39277	1.6965	3.12303
sp|O94762|RECQ5_HUMAN	RECQ5_HUMAN	#N/A	#N/A	#N/A	1.69099	3.97988
sp|Q14684|RRP1B_HUMAN	RRP1B_HUMAN	RRP1B	6.85095	2.61743	1.6628	1.62194
sp|Q8IYU8|MICU2_HUMAN	MICU2_HUMAN	MICU2	28.9946	5.38466	1.65193	2.364
sp|O95292|VAPB_HUMAN	VAPB_HUMAN	VAPB	1.40454	1.18513	1.6513	-2.61914
sp|P10321|1C07_HUMAN;sp|Q31612|1B73_HUMAN;sp|Q29963|1C06_HUMAN;sp|Q29960|1C16_HUMAN;sp|Q07000|1C15_HUMAN;sp|P30508|1C12_HUMAN;sp|P30501|1C02_HUMAN;sp|Q95604|1C17_HUMAN	1C07_HUMAN	#N/A	#N/A	#N/A	1.63144	1.21527
sp|P62829|RL23_HUMAN	RL23_HUMAN	RPL23	5.89961	2.42891	1.62935	1.15933
sp|P24752|THIL_HUMAN	THIL_HUMAN	ACAT1	9.98738	3.16028	1.56708	2.90327
sp|O94826|TOM70_HUMAN	TOM70_HUMAN	TOMM70	2.65413	1.62915	1.56225	-2.29237
sp|O75616|ERAL1_HUMAN	ERAL1_HUMAN	ERAL1	43.104	6.56537	1.53976	1.8123
sp|Q3ZCQ8|TIM50_HUMAN	TIM50_HUMAN	TIMM50	4.16722	2.04138	1.52583	2.56574
sp|Q99879|H2B1M_HUMAN;sp|Q99880|H2B1L_HUMAN;sp|Q99877|H2B1N_HUMAN;sp|Q93079|H2B1H_HUMAN;sp|Q5QNW6|H2B2F_HUMAN;sp|P62807|H2B1C_HUMAN;sp|P58876|H2B1D_HUMAN;sp|P57053|H2BFS_HUMAN;sp|O60814|H2B1K_HUMAN	H2B1M_HUMAN	#N/A	#N/A	#N/A	1.51989	2.82073
sp|P61081|UBC12_HUMAN	UBC12_HUMAN	UBE2M	2.91288	1.70672	1.51729	2.43324
sp|Q9Y4W6|AFG32_HUMAN	AFG32_HUMAN	AFG3L2	2.39723	1.5483	1.51019	-3.01127
sp|P10599|THIO_HUMAN	THIO_HUMAN	TXN	9.172	3.02853	1.43514	1.84439
sp|P15924|DESP_HUMAN	DESP_HUMAN	DSP	0	0	1.41761	-3.51834
sp|Q9Y285|SYFA_HUMAN	SYFA_HUMAN	FARSA	3.6008	1.89758	1.40531	1.36029
sp|Q15417|CNN3_HUMAN	CNN3_HUMAN	CNN3	5.33041	2.30877	1.40504	2.94471
sp|Q14318|FKBP8_HUMAN	FKBP8_HUMAN	FKBP8	3.72566	1.9302	1.36794	1.85687
sp|Q16822|PCKGM_HUMAN	PCKGM_HUMAN	PCK2	0	0	1.36785	1.26951
sp|Q2TBE0|C19L2_HUMAN	C19L2_HUMAN	CWF19L2	2.33218	1.52715	1.36583	1.31027
sp|P25398|RS12_HUMAN	RS12_HUMAN	RPS12	7.19394	2.68215	1.36322	2.28242
sp|Q92598|HS105_HUMAN	HS105_HUMAN	HSPH1	0	0	1.35329	-3.92192
sp|O95478|NSA2_HUMAN	NSA2_HUMAN	NSA2	38.0077	6.16504	1.33501	1.88819
sp|P28288|ABCD3_HUMAN	ABCD3_HUMAN	ABCD3	7.19779	2.68287	1.33442	-1.12211
sp|P46776|RL27A_HUMAN	RL27A_HUMAN	RPL27A	5.72235	2.39214	1.3313	1.13785
sp|Q8NI27|THOC2_HUMAN	THOC2_HUMAN	THOC2	0.67335	0.820579	1.31181	-2.74097
sp|Q9Y4P3|TBL2_HUMAN	TBL2_HUMAN	TBL2	12.6912	3.56247	1.31096	2.59738
sp|Q6P444|MTFR2_HUMAN	MTFR2_HUMAN	MTFR2	34.4802	5.87198	1.30777	2.09295
sp|P53367|ARFP1_HUMAN	ARFP1_HUMAN	ARFIP1	19.5077	4.41676	1.30336	1.82546
sp|Q9UNX3|RL26L_HUMAN	RL26L_HUMAN	RPL26L1	4.29746	2.07303	1.29719	-2.96223
sp|Q03001|DYST_HUMAN	DYST_HUMAN	DST	3.91181	1.97783	1.28717	-3.88905
sp|Q8TB36|GDAP1_HUMAN	GDAP1_HUMAN	GDAP1	4.18694	2.0462	1.27129	1.68092
sp|P15531|NDKA_HUMAN	NDKA_HUMAN	NME1	13.853	3.72196	1.27019	1.84986
sp|P48444|COPD_HUMAN	COPD_HUMAN	ARCN1	30.3435	5.5085	1.26413	2.4311
sp|P11177|ODPB_HUMAN	ODPB_HUMAN	PDHB	0	0	1.25334	1.03935
sp|Q15208|STK38_HUMAN	STK38_HUMAN	STK38	11.7782	3.43194	1.24933	2.30343
sp|Q96ME7|ZN512_HUMAN	ZN512_HUMAN	ZNF512	25.8687	5.08613	1.2353	1.9076
sp|P84157|MXRA7_HUMAN	MXRA7_HUMAN	MXRA7	2.52246	1.58823	1.23044	1.83655
sp|P51957|NEK4_HUMAN	NEK4_HUMAN	NEK4	0	0	1.22933	1.18615
sp|P63261|ACTG_HUMAN;sp|P60709|ACTB_HUMAN	ACTG_HUMAN	ACTG1	22.9746	4.79319	1.22048	1.65423
sp|Q9H7C9|AAMDC_HUMAN	AAMDC_HUMAN	AAMDC	2.9331	1.71263	1.22042	2.05768
sp|Q6FI81|CPIN1_HUMAN	CPIN1_HUMAN	CIAPIN1	19.8457	4.45485	1.20507	1.96823
sp|P63173|RL38_HUMAN	RL38_HUMAN	RPL38	3.91865	1.97956	1.19488	2.41911
sp|Q99618|CDCA3_HUMAN	CDCA3_HUMAN	CDCA3	94.055	9.69819	1.19315	1.52107
sp|P62241|RS8_HUMAN	RS8_HUMAN	RPS8	4.63577	2.15308	1.19183	0.926111
sp|P62857|RS28_HUMAN	RS28_HUMAN	#N/A	#N/A	#N/A	1.18891	0.875461
sp|Q9NVN8|GNL3L_HUMAN	GNL3L_HUMAN	GNL3L	3.46718	1.86204	1.17836	-2.4775
sp|Q13823|NOG2_HUMAN	NOG2_HUMAN	GNL2	0	0	1.17787	-2.71246
sp|P42766|RL35_HUMAN	RL35_HUMAN	RPL35	7.31588	2.70479	1.17517	0.955297
sp|Q58EX7|PKHG4_HUMAN	PKHG4_HUMAN	PLEKHG4	2.4208	1.55589	1.17215	1.34551
sp|Q9Y6M7|S4A7_HUMAN	S4A7_HUMAN	SLC4A7	0.721143	0.849201	1.15984	-2.94176
sp|Q9UPQ3|AGAP1_HUMAN	AGAP1_HUMAN	AGAP1	6.31729	2.51342	1.15066	2.25578
sp|P05166|PCCB_HUMAN	PCCB_HUMAN	PCCB	41.3639	6.43148	1.14964	2.08838
sp|P09874|PARP1_HUMAN	PARP1_HUMAN	PARP1	5.34003	2.31085	1.12675	1.3627
sp|P40938|RFC3_HUMAN	RFC3_HUMAN	RFC3	9.26411	3.0437	1.11159	0.897174
sp|Q9Y4E8|UBP15_HUMAN	UBP15_HUMAN	USP15	0.876096	0.936	1.10404	-3.13281
sp|Q5T3I0|GPTC4_HUMAN	GPTC4_HUMAN	GPATCH4	5.15561	2.2706	1.10165	2.10025
sp|O00483|NDUA4_HUMAN	NDUA4_HUMAN	NDUFA4	19.5012	4.41601	1.08921	2.02211
sp|Q8WUX9|CHMP7_HUMAN	CHMP7_HUMAN	CHMP7	5.90985	2.43102	1.08177	1.72723
sp|Q9Y388|RBMX2_HUMAN	RBMX2_HUMAN	RBMX2	34.5306	5.87628	1.07906	2.00035
sp|O00567|NOP56_HUMAN	NOP56_HUMAN	NOP56	7.05511	2.65615	1.07887	2.91575
sp|Q14739|LBR_HUMAN	LBR_HUMAN	LBR	2.65377	1.62904	1.07723	-2.03309
sp|P62244|RS15A_HUMAN	RS15A_HUMAN	RPS15A	4.04247	2.01059	1.05352	2.4663
sp|Q92878|RAD50_HUMAN	RAD50_HUMAN	RAD50	2.5847	1.6077	1.05285	-2.66215
sp|O15235|RT12_HUMAN	RT12_HUMAN	MRPS12	8.18713	2.86132	1.0441	2.45964
sp|Q13428|TCOF_HUMAN	TCOF_HUMAN	TCOF1	9.92978	3.15116	1.04262	1.12281
sp|Q8IUD2|RB6I2_HUMAN	RB6I2_HUMAN	ERC1	6.02056	2.45368	1.04033	2.78733
sp|Q9GZS1|RPA49_HUMAN	RPA49_HUMAN	POLR1E	68.4615	8.27415	1.03942	1.4942
sp|Q99996|AKAP9_HUMAN	AKAP9_HUMAN	AKAP9	0	0	1.03354	-3.29599
sp|Q15311|RBP1_HUMAN	RBP1_HUMAN	RALBP1	15.3277	3.91505	1.03301	2.35889
sp|Q9H3U1|UN45A_HUMAN	UN45A_HUMAN	UNC45A	0.627103	0.791898	1.03149	-3.05403
sp|P18621|RL17_HUMAN	RL17_HUMAN	RPL17	4.17388	2.04301	1.02753	0.697674
sp|P55010|IF5_HUMAN	IF5_HUMAN	EIF5	1.98679	1.40954	1.01977	-2.202
sp|O00151|PDLI1_HUMAN	PDLI1_HUMAN	PDLIM1	4.58744	2.14183	1.01973	2.05794
sp|Q8IWS0|PHF6_HUMAN	PHF6_HUMAN	PHF6	9.30664	3.05068	1.00735	2.41913
sp|Q96EX3|WDR34_HUMAN	WDR34_HUMAN	WDR34	23.2486	4.82168	1.00072	1.38262
sp|O75179|ANR17_HUMAN	ANR17_HUMAN	ANKRD17	1.39041	1.17916	0.994735	-2.89303
sp|Q9UER7|DAXX_HUMAN	DAXX_HUMAN	DAXX	3.75497	1.93777	0.994609	2.16394
sp|P50416|CPT1A_HUMAN	CPT1A_HUMAN	CPT1A	1.48262	1.21763	0.993013	-2.18915
sp|Q9UBF2|COPG2_HUMAN	COPG2_HUMAN	COPG2	2.76155	1.66179	0.992907	-2.30827
sp|P98170|XIAP_HUMAN	XIAP_HUMAN	XIAP	24.185	4.91782	0.987003	1.32564
sp|P08238|HS90B_HUMAN	HS90B_HUMAN	HSP90AB1	3.96355	1.99087	0.975163	-1.20634
sp|P09543|CN37_HUMAN	CN37_HUMAN	CNP	18.6436	4.31783	0.970044	1.42328
sp|Q9H8Y8|GORS2_HUMAN	GORS2_HUMAN	GORASP2	3.73533	1.9327	0.967641	2.25088
sp|Q9HCC0|MCCB_HUMAN	MCCB_HUMAN	MCCC2	36.5354	6.04445	0.95836	1.33963
sp|Q9BVP2|GNL3_HUMAN	GNL3_HUMAN	GNL3	8.85936	2.97647	0.954482	0.753491
sp|Q8NEN9|PDZD8_HUMAN	PDZD8_HUMAN	PDZD8	0	0	0.953191	-2.59256
sp|Q07812|BAX_HUMAN	BAX_HUMAN	BAX	3.65113	1.91079	0.950058	2.39122
sp|Q9C0D5|TANC1_HUMAN	TANC1_HUMAN	TANC1	1.75778	1.32581	0.948218	-1.92673
sp|P05412|JUN_HUMAN	JUN_HUMAN	JUN	34.8495	5.90335	0.945301	1.28425
sp|Q96A49|SYAP1_HUMAN	SYAP1_HUMAN	SYAP1	4.15643	2.03873	0.935587	1.80204
sp|Q96EY4|TMA16_HUMAN	TMA16_HUMAN	TMA16	6.32982	2.51591	0.932126	2.42425
sp|Q8NC51|PAIRB_HUMAN	PAIRB_HUMAN	SERBP1	4.51145	2.12402	0.929406	2.3121
sp|Q9P031|TAP26_HUMAN	TAP26_HUMAN	CCDC59	5.23895	2.28888	0.925291	2.52817
sp|O60664|PLIN3_HUMAN	PLIN3_HUMAN	PLIN3	0	0	0.92269	1.00322
sp|P62753|RS6_HUMAN	RS6_HUMAN	RPS6	7.48945	2.73669	0.921658	0.779307
sp|Q9NVI7|ATD3A_HUMAN	ATD3A_HUMAN	ATAD3A	3.7906	1.94695	0.913928	1.9324
sp|P62861|RS30_HUMAN	RS30_HUMAN	FAU	3.87883	1.96948	0.913254	-1.06325
sp|Q15390|MTFR1_HUMAN	MTFR1_HUMAN	MTFR1	6.34145	2.51822	0.909246	1.94842
sp|Q93045|STMN2_HUMAN	STMN2_HUMAN	STMN2	0	0	0.903393	1.75472
sp|Q8N6T3|ARFG1_HUMAN	ARFG1_HUMAN	ARFGAP1	3.46006	1.86012	0.902167	1.93567
sp|Q9NWT8|AKIP_HUMAN	AKIP_HUMAN	AURKAIP1	0	0	0.899753	2.4848
sp|P62913|RL11_HUMAN	RL11_HUMAN	RPL11	2.95157	1.71801	0.896097	1.3303
sp|Q8IWC1|MA7D3_HUMAN	MA7D3_HUMAN	MAP7D3	7.40379	2.72099	0.895192	2.18703
sp|Q5VZ89|DEN4C_HUMAN	DEN4C_HUMAN	DENND4C	0	0	0.890533	-2.62382
sp|P62304|RUXE_HUMAN	RUXE_HUMAN	SNRPE	2.70256	1.64395	0.885306	1.2376
sp|P35268|RL22_HUMAN	RL22_HUMAN	RPL22	16.3552	4.04416	0.884599	2.1039
sp|Q99755|PI51A_HUMAN	PI51A_HUMAN	PIP5K1A	4.62871	2.15144	0.873214	2.03299
sp|Q71U36|TBA1A_HUMAN	TBA1A_HUMAN	TUBA1A	0	0	0.870322	1.51116
sp|Q13596|SNX1_HUMAN	SNX1_HUMAN	SNX1	0.718008	0.847353	0.869242	-2.18042
sp|P42704|LPPRC_HUMAN	LPPRC_HUMAN	LRPPRC	2.31731	1.52227	0.868704	-2.92148
sp|Q9BU76|MMTA2_HUMAN	MMTA2_HUMAN	MMTAG2	3.91668	1.97906	0.866625	0.851992
sp|P19338|NUCL_HUMAN	NUCL_HUMAN	NCL	1.90375	1.37976	0.85589	-2.32098
sp|Q6UB99|ANR11_HUMAN	ANR11_HUMAN	ANKRD11	9.1052	3.01748	0.851277	2.75455
sp|P22626|ROA2_HUMAN	ROA2_HUMAN	HNRNPA2B1	2.62638	1.62061	0.846129	1.16335
sp|Q9UBC2|EP15R_HUMAN	EP15R_HUMAN	EPS15L1	4.79163	2.18898	0.846125	2.0294
sp|Q6NSJ2|PHLB3_HUMAN	PHLB3_HUMAN	PHLDB3	21.4583	4.63231	0.841397	1.09588
sp|O95819|M4K4_HUMAN	M4K4_HUMAN	MAP4K4	0	0	0.841022	-2.20262
sp|Q15388|TOM20_HUMAN	TOM20_HUMAN	TOMM20	15.0301	3.87687	0.838635	2.01111
sp|P62249|RS16_HUMAN	RS16_HUMAN	RPS16	6.17709	2.48537	0.833454	0.805536
sp|P61927|RL37_HUMAN	RL37_HUMAN	RPL37	12.0839	3.47619	0.824338	1.74487
sp|P17480|UBF1_HUMAN	UBF1_HUMAN	UBTF	19.2051	4.38236	0.821899	1.55099
sp|O75427|LRCH4_HUMAN	LRCH4_HUMAN	LRCH4	11.4082	3.3776	0.821174	1.02639
sp|O95433|AHSA1_HUMAN	AHSA1_HUMAN	AHSA1	11.0605	3.32574	0.813353	1.48004
sp|P56589|PEX3_HUMAN	PEX3_HUMAN	PEX3	1.65772	1.28753	0.807431	1.6779
sp|Q8WTT2|NOC3L_HUMAN	NOC3L_HUMAN	NOC3L	5.07939	2.25375	0.804718	1.74695
sp|P18583|SON_HUMAN	SON_HUMAN	SON	3.77106	1.94192	0.802074	-1.17419
sp|Q86YS7|C2CD5_HUMAN	C2CD5_HUMAN	C2CD5	5.08302	2.25456	0.798479	1.89504
sp|Q12983|BNIP3_HUMAN	BNIP3_HUMAN	BNIP3	5.27838	2.29747	0.793219	1.38929
sp|Q9P0T7|TMEM9_HUMAN	TMEM9_HUMAN	TMEM9	0	0	0.787502	1.08675
sp|Q5VTE0|EF1A3_HUMAN;sp|P68104|EF1A1_HUMAN	EF1A3_HUMAN	EEF1A1P5	0	0	0.784108	-0.673477
sp|Q9ULS5|TMCC3_HUMAN	TMCC3_HUMAN	TMCC3	0	0	0.781714	0.867619
sp|Q9NP64|NO40_HUMAN	NO40_HUMAN	ZCCHC17	13.7864	3.71301	0.771222	1.68914
sp|Q9Y520|PRC2C_HUMAN	PRC2C_HUMAN	PRRC2C	5.67909	2.38309	0.759845	-2.77565
sp|P84022|SMAD3_HUMAN;sp|Q15796|SMAD2_HUMAN;sp|O15198|SMAD9_HUMAN	SMAD3_HUMAN	SMAD3	3.61381	1.901	0.758211	0.928628
sp|Q9NYJ8|TAB2_HUMAN	TAB2_HUMAN	TAB2	18.2602	4.2732	0.75489	1.21596
sp|P50402|EMD_HUMAN	EMD_HUMAN	EMD	1.78629	1.33652	0.75126	-1.5144
sp|Q15836|VAMP3_HUMAN	VAMP3_HUMAN	VAMP3	1.47758	1.21556	0.750898	1.59641
sp|Q9H0A0|NAT10_HUMAN	NAT10_HUMAN	NAT10	5.64345	2.3756	0.739816	2.09573
sp|Q92540|SMG7_HUMAN	SMG7_HUMAN	SMG7	2.01508	1.41953	0.73327	1.63717
sp|Q9H3P7|GCP60_HUMAN	GCP60_HUMAN	ACBD3	1.37777	1.17378	0.731455	-2.04081
sp|P30837|AL1B1_HUMAN	AL1B1_HUMAN	ALDH1B1	3.93784	1.9844	0.728118	0.802385
sp|O60238|BNI3L_HUMAN	BNI3L_HUMAN	BNIP3L	9.73742	3.12048	0.72628	1.06591
sp|Q8TC07|TBC15_HUMAN	TBC15_HUMAN	TBC1D15	2.57667	1.6052	0.72582	-2.04596
sp|Q59GN2|R39L5_HUMAN;sp|P62891|RL39_HUMAN	R39L5_HUMAN	RPL39P5	0	0	0.7165	-1.69145
sp|Q2M1P5|KIF7_HUMAN	KIF7_HUMAN	KIF7	13.9641	3.73686	0.716136	1.26521
sp|Q9Y266|NUDC_HUMAN	NUDC_HUMAN	NUDC	3.24631	1.80175	0.710572	-1.11528
sp|Q96P47|AGAP3_HUMAN	AGAP3_HUMAN	AGAP3	3.76669	1.9408	0.70998	1.48896
sp|P37802|TAGL2_HUMAN	TAGL2_HUMAN	TAGLN2	4.08216	2.02044	0.704709	1.13728
sp|P08708|RS17_HUMAN	RS17_HUMAN	RPS17	0	0	0.704668	1.61772
sp|Q9UH62|ARMX3_HUMAN	ARMX3_HUMAN	ARMCX3	4.32073	2.07864	0.701816	2.16579
sp|P49069|CAMLG_HUMAN	CAMLG_HUMAN	CAMLG	0	0	0.700013	-1.5429
sp|P35030|TRY3_HUMAN	TRY3_HUMAN	PRSS3	0	0	0.697228	1.97866
sp|P68371|TBB4B_HUMAN	TBB4B_HUMAN	TUBB4B	6.60315	2.56966	0.697097	0.949026
sp|Q99878|H2A1J_HUMAN;sp|Q96KK5|H2A1H_HUMAN;sp|Q9BTM1|H2AJ_HUMAN;sp|Q16777|H2A2C_HUMAN;sp|Q93077|H2A1C_HUMAN;sp|Q7L7L0|H2A3_HUMAN;sp|Q6FI13|H2A2A_HUMAN;sp|P20671|H2A1D_HUMAN;sp|P0C0S8|H2A1_HUMAN;sp|P04908|H2A1B_HUMAN;sp|Q71UI9|H2AV_HUMAN;sp|P0C0S5|H2AZ_HUMAN;sp|Q96QV6|H2A1A_HUMAN;sp|P16104|H2AX_HUMAN	H2A1J_HUMAN	HIST1H2AJ	0	0	0.696223	1.42716
sp|P11387|TOP1_HUMAN	TOP1_HUMAN	TOP1	4.02452	2.00612	0.695909	1.7821
sp|P49006|MRP_HUMAN	MRP_HUMAN	MARCKSL1	2.39663	1.54811	0.695553	1.07818
sp|Q9UJV9|DDX41_HUMAN	DDX41_HUMAN	DDX41	16.102	4.01273	0.693779	1.37924
sp|P49207|RL34_HUMAN	RL34_HUMAN	RPL34	4.46947	2.11411	0.691218	0.91107
sp|Q5HYI8|RABL3_HUMAN	RABL3_HUMAN	RABL3	0.702109	0.83792	0.688058	-1.86679
sp|Q99551|MTEF1_HUMAN	MTEF1_HUMAN	MTERF1	70.1515	8.37565	0.684889	0.964823
sp|Q99615|DNJC7_HUMAN	DNJC7_HUMAN	DNAJC7	0	0	0.684464	-1.64449
sp|Q5VV42|CDKAL_HUMAN	CDKAL_HUMAN	CDKAL1	3.91069	1.97755	0.674574	-1.57069
sp|Q9Y6B6|SAR1B_HUMAN	SAR1B_HUMAN	SAR1B	1.86984	1.36742	0.6742	1.21782
sp|P52789|HXK2_HUMAN	HXK2_HUMAN	HK2	3.08215	1.7556	0.670397	-2.18962
sp|Q9UPP1|PHF8_HUMAN	PHF8_HUMAN	PHF8	0	0	0.667086	-1.34382
sp|Q13459|MYO9B_HUMAN	MYO9B_HUMAN	MYO9B	6.17247	2.48445	0.66641	1.98842
sp|O60716|CTND1_HUMAN	CTND1_HUMAN	CTNND1	0.693811	0.832953	0.665635	-1.82533
sp|P61619|S61A1_HUMAN	S61A1_HUMAN	SEC61A1	10.6043	3.25642	0.663643	1.64726
sp|P14174|MIF_HUMAN	MIF_HUMAN	MIF	0	0	0.66181	0.801995
sp|P40616|ARL1_HUMAN	ARL1_HUMAN	ARL1	1.95668	1.39881	0.661242	1.25804
sp|P33176|KINH_HUMAN	KINH_HUMAN	KIF5B	0	0	0.656531	-1.68183
sp|P11142|HSP7C_HUMAN	HSP7C_HUMAN	HSPA8	4.34789	2.08516	0.65129	-1.5517
sp|P42566|EPS15_HUMAN	EPS15_HUMAN	EPS15	0.87612	0.936013	0.650121	1.56003
sp|Q9UPW5|CBPC1_HUMAN	CBPC1_HUMAN	AGTPBP1	5.07702	2.25322	0.649966	1.48881
sp|Q9BWH2|FUND2_HUMAN	FUND2_HUMAN	FUNDC2	3.02023	1.73788	0.649827	1.07133
sp|Q12923|PTN13_HUMAN	PTN13_HUMAN	PTPN13	6.97798	2.64159	0.649366	2.00798
sp|Q14839|CHD4_HUMAN	CHD4_HUMAN	CHD4	3.34123	1.8279	0.648451	-2.03194
sp|P16333|NCK1_HUMAN	NCK1_HUMAN	NCK1	30.251	5.50009	0.647001	1.38198
sp|P35611|ADDA_HUMAN	ADDA_HUMAN	ADD1	0.838528	0.915712	0.645879	-1.72129
sp|O95202|LETM1_HUMAN	LETM1_HUMAN	LETM1	3.39694	1.84308	0.644216	-2.01644
sp|Q7L7X3|TAOK1_HUMAN	TAOK1_HUMAN	TAOK1	0	0	0.635957	0.877417
sp|O00571|DDX3X_HUMAN;sp|O15523|DDX3Y_HUMAN	DDX3X_HUMAN	DDX3X	0.886858	0.941731	0.633932	-1.79592
sp|P52429|DGKE_HUMAN	DGKE_HUMAN	DGKE	25.1901	5.01897	0.632032	0.9877
sp|Q00839|HNRPU_HUMAN	HNRPU_HUMAN	HNRNPU	2.37634	1.54154	0.631316	-1.60501
sp|Q969Z3|MARC2_HUMAN	MARC2_HUMAN	MARC2	3.85703	1.96393	0.624917	1.14214
sp|Q9NVH0|EXD2_HUMAN	EXD2_HUMAN	EXD2	5.25678	2.29277	0.620913	0.743355
sp|P61254|RL26_HUMAN	RL26_HUMAN	RPL26	8.01238	2.83062	0.614807	0.715584
sp|Q13586|STIM1_HUMAN	STIM1_HUMAN	STIM1	0	0	0.612761	-1.86436
sp|P05165|PCCA_HUMAN	PCCA_HUMAN	PCCA	13.0094	3.60685	0.61186	-2.49785
sp|O75381|PEX14_HUMAN	PEX14_HUMAN	PEX14	4.10098	2.02509	0.610661	1.63303
sp|Q14137|BOP1_HUMAN	BOP1_HUMAN	BOP1	4.17904	2.04427	0.610129	1.56712
sp|P12270|TPR_HUMAN	TPR_HUMAN	TPR	8.31604	2.88376	0.600722	1.47755
sp|Q4VCS5|AMOT_HUMAN	AMOT_HUMAN	AMOT	7.55665	2.74894	0.598831	2.56189
sp|Q16513|PKN2_HUMAN	PKN2_HUMAN	PKN2	30.3196	5.50633	0.595709	1.48265
sp|Q05823|RN5A_HUMAN	RN5A_HUMAN	RNASEL	6.23446	2.49689	0.594937	-1.02768
sp|P07437|TBB5_HUMAN	TBB5_HUMAN	TUBB	6.5441	2.55814	0.591005	0.906593
sp|O75976|CBPD_HUMAN	CBPD_HUMAN	CPD	0.733302	0.856331	0.588484	-1.82133
sp|Q9Y6R0|NUMBL_HUMAN	NUMBL_HUMAN	NUMBL	0	0	0.588329	1.26721
sp|P50990|TCPQ_HUMAN	TCPQ_HUMAN	CCT8	7.62146	2.7607	0.586638	-0.892634
sp|Q96MW1|CCD43_HUMAN	CCD43_HUMAN	CCDC43	0.669872	0.818457	0.586553	-1.53413
sp|P49959|MRE11_HUMAN	MRE11_HUMAN	MRE11	3.9827	1.99567	0.586526	-1.19072
sp|Q9Y5M8|SRPRB_HUMAN	SRPRB_HUMAN	SRPRB	0.825329	0.908476	0.584675	-1.84544
sp|Q15365|PCBP1_HUMAN	PCBP1_HUMAN	PCBP1	2.82227	1.67996	0.58357	0.694025
sp|O75691|UTP20_HUMAN	UTP20_HUMAN	UTP20	6.30872	2.51172	0.583357	1.72788
sp|Q02878|RL6_HUMAN	RL6_HUMAN	RPL6	8.5858	2.93015	0.583055	1.62537
sp|Q5JSH3|WDR44_HUMAN	WDR44_HUMAN	WDR44	0.990351	0.995164	0.581781	-1.7298
sp|P16949|STMN1_HUMAN	STMN1_HUMAN	STMN1	6.97025	2.64012	0.579703	-1.29756
sp|O43426|SYNJ1_HUMAN	SYNJ1_HUMAN	SYNJ1	1.12293	1.05968	0.577454	-1.85423
sp|P60866|RS20_HUMAN	RS20_HUMAN	RPS20	2.81874	1.67891	0.565144	1.55775
sp|Q9NZ01|TECR_HUMAN	TECR_HUMAN	TECR	0	0	0.561518	-1.75414
sp|P08195|4F2_HUMAN	4F2_HUMAN	SLC3A2	5.06271	2.25005	0.559669	-0.782094
sp|P46779|RL28_HUMAN	RL28_HUMAN	RPL28	4.00957	2.00239	0.559134	0.755768
sp|P56192|SYMC_HUMAN	SYMC_HUMAN	MARS	2.61463	1.61698	0.558953	-1.02845
sp|Q3V6T2|GRDN_HUMAN	GRDN_HUMAN	CCDC88A	4.19281	2.04764	0.557419	1.58492
sp|O43143|DHX15_HUMAN	DHX15_HUMAN	DHX15	2.21815	1.48935	0.555194	-1.45683
sp|Q9UH92|MLX_HUMAN	MLX_HUMAN	MLX	0	0	0.554242	0.883906
sp|Q86Y82|STX12_HUMAN	STX12_HUMAN	STX12	0	0	0.5538	0.875545
sp|P46778|RL21_HUMAN	RL21_HUMAN	RPL21	2.73682	1.65433	0.553565	-1.42702
sp|Q9NV70|EXOC1_HUMAN	EXOC1_HUMAN	EXOC1	48.8739	6.99098	0.552352	1.12319
sp|Q8TBA6|GOGA5_HUMAN	GOGA5_HUMAN	GOLGA5	4.12601	2.03126	0.548862	1.76309
sp|O00161|SNP23_HUMAN	SNP23_HUMAN	SNAP23	0	0	0.548348	0.910013
sp|Q13190|STX5_HUMAN	STX5_HUMAN	STX5	4.48063	2.11675	0.547465	1.7647
sp|Q14157|UBP2L_HUMAN	UBP2L_HUMAN	UBAP2L	4.29277	2.0719	0.544665	1.70017
sp|P49411|EFTU_HUMAN	EFTU_HUMAN	TUFM	4.15788	2.03909	0.544506	1.11294
sp|P46821|MAP1B_HUMAN	MAP1B_HUMAN	MAP1B	0.588155	0.766913	0.541987	-2.18859
sp|P53804|TTC3_HUMAN	TTC3_HUMAN	TTC3	8.28621	2.87858	0.538027	1.54499
sp|Q9Y3T9|NOC2L_HUMAN	NOC2L_HUMAN	NOC2L	14.3224	3.78449	0.536364	1.04293
sp|Q96S66|CLCC1_HUMAN	CLCC1_HUMAN	CLCC1	2.21901	1.48963	0.533928	-1.78202
sp|Q9NWB6|ARGL1_HUMAN	ARGL1_HUMAN	ARGLU1	24.7042	4.97034	0.533383	1.67911
sp|P25705|ATPA_HUMAN	ATPA_HUMAN	ATP5F1A	8.38236	2.89523	0.531968	1.41087
sp|P39019|RS19_HUMAN	RS19_HUMAN	RPS19	2.0355	1.42671	0.524668	0.995011
sp|Q6P996|PDXD1_HUMAN	PDXD1_HUMAN	PDXDC1	0.825879	0.908779	0.523148	-1.3874
sp|Q13085|ACACA_HUMAN	ACACA_HUMAN	ACACA	17.6335	4.19922	0.520388	-0.742014
sp|Q9NZ45|CISD1_HUMAN	CISD1_HUMAN	CISD1	3.48818	1.86767	0.519225	-0.944426
sp|Q9NRA8|4ET_HUMAN	4ET_HUMAN	EIF4ENIF1	3.62711	1.9045	0.518229	-1.56985
sp|Q14683|SMC1A_HUMAN	SMC1A_HUMAN	SMC1A	1.04664	1.02305	0.5181	-1.67128
sp|P38646|GRP75_HUMAN	GRP75_HUMAN	HSPA9	0.971175	0.985482	0.517382	-1.64998
sp|P32121|ARRB2_HUMAN	ARRB2_HUMAN	ARRB2	6.06145	2.462	0.516654	-1.32143
sp|Q5SQN1|SNP47_HUMAN	SNP47_HUMAN	SNAP47	7.61367	2.75929	0.516593	1.26193
sp|O00429|DNM1L_HUMAN	DNM1L_HUMAN	DNM1L	5.60752	2.36802	0.515738	-0.896056
sp|O00763|ACACB_HUMAN	ACACB_HUMAN	ACACB	9.13875	3.02304	0.514093	-2.07659
sp|P06748|NPM_HUMAN	NPM_HUMAN	NPM1	4.1528	2.03784	0.511074	1.40984
sp|Q8N9N7|LRC57_HUMAN	LRC57_HUMAN	LRRC57	1.42309	1.19293	0.510065	1.01132
sp|P36873|PP1G_HUMAN;sp|P62136|PP1A_HUMAN	PP1G_HUMAN	PPP1CC	0	0	0.509168	-0.604856
sp|Q07820|MCL1_HUMAN	MCL1_HUMAN	MCL1	4.99354	2.23462	0.508745	1.0701
sp|O75400|PR40A_HUMAN	PR40A_HUMAN	PRPF40A	4.67898	2.1631	0.508141	1.52851
sp|Q96AG3|S2546_HUMAN	S2546_HUMAN	SLC25A46	9.99235	3.16107	0.508017	1.16164
sp|Q14145|KEAP1_HUMAN	KEAP1_HUMAN	KEAP1	0	0	0.50686	0.79332
sp|Q15942|ZYX_HUMAN	ZYX_HUMAN	ZYX	1.62924	1.27642	0.506128	1.01686
sp|Q9UQN3|CHM2B_HUMAN	CHM2B_HUMAN	CHMP2B	3.38723	1.84044	0.505547	1.35173
sp|O43290|SNUT1_HUMAN	SNUT1_HUMAN	SART1	1.41757	1.19062	0.500639	-1.38894
sp|Q9BQA1|MEP50_HUMAN	MEP50_HUMAN	WDR77	9.4043	3.06664	0.498409	1.00126
sp|Q9HCK8|CHD8_HUMAN	CHD8_HUMAN	CHD8	8.44616	2.90623	0.498329	2.20566
sp|Q9UPQ9|TNR6B_HUMAN	TNR6B_HUMAN	TNRC6B	7.82897	2.79803	0.498153	-0.824506
sp|Q96GQ7|DDX27_HUMAN	DDX27_HUMAN	DDX27	4.86745	2.20623	0.497798	1.59463
sp|Q9BRX8|F213A_HUMAN	F213A_HUMAN	FAM213A	2.21593	1.4886	0.495734	0.631168
sp|P31948|STIP1_HUMAN	STIP1_HUMAN	STIP1	3.18953	1.78593	0.495151	-1.73024
sp|P78310|CXAR_HUMAN	CXAR_HUMAN	CXADR	1.71652	1.31016	0.491508	1.03346
sp|P57772|SELB_HUMAN	SELB_HUMAN	EEFSEC	5.41159	2.32628	0.488086	1.42659
sp|P52594|AGFG1_HUMAN	AGFG1_HUMAN	AGFG1	126.984	11.2687	0.485981	0.998534
sp|Q99714|HCD2_HUMAN	HCD2_HUMAN	HSD17B10	5.75498	2.39895	0.485731	0.68406
sp|O94842|TOX4_HUMAN	TOX4_HUMAN	TOX4	0.819294	0.905149	0.485546	-1.60577
sp|Q9NRY4|RHG35_HUMAN	RHG35_HUMAN	ARHGAP35	54.1868	7.36117	0.484627	1.44903
sp|Q9GZT9|EGLN1_HUMAN	EGLN1_HUMAN	EGLN1	2.88536	1.69863	0.484355	0.820766
sp|Q96T58|MINT_HUMAN	MINT_HUMAN	SPEN	0	0	0.47984	-1.78533
sp|P35659|DEK_HUMAN	DEK_HUMAN	DEK	29.9654	5.47406	0.479792	0.873191
sp|P19784|CSK22_HUMAN	CSK22_HUMAN	CSNK2A2	4.7795	2.18621	0.477159	0.842647
sp|P55011|S12A2_HUMAN	S12A2_HUMAN	SLC12A2	3.29634	1.81558	0.475726	-0.741753
sp|P50747|BPL1_HUMAN	BPL1_HUMAN	HLCS	0	0	0.475515	-1.2798
sp|Q9Y3U8|RL36_HUMAN	RL36_HUMAN	RPL36	3.59633	1.8964	0.473919	1.03331
sp|P12277|KCRB_HUMAN	KCRB_HUMAN	CKB	2.13063	1.45967	0.473785	0.71011
sp|Q92968|PEX13_HUMAN	PEX13_HUMAN	PEX13	0	0	0.473137	0.91632
sp|P61353|RL27_HUMAN	RL27_HUMAN	RPL27	4.19685	2.04862	0.472896	1.17754
sp|Q96D09|GASP2_HUMAN	GASP2_HUMAN	GPRASP2	0	0	0.472884	1.03275
sp|O75190|DNJB6_HUMAN	DNJB6_HUMAN	DNAJB6	4.70659	2.16947	0.472189	1.00507
sp|O15063|K0355_HUMAN	K0355_HUMAN	KIAA0355	0	0	0.469935	-2.38063
sp|Q8TAA9|VANG1_HUMAN	VANG1_HUMAN	VANGL1	1.46532	1.2105	0.469288	1.14793
sp|Q08379|GOGA2_HUMAN	GOGA2_HUMAN	GOLGA2	2.2701	1.50669	0.468113	-1.23483
sp|P49327|FAS_HUMAN	FAS_HUMAN	FASN	8.88596	2.98093	0.467173	-0.718141
sp|Q92574|TSC1_HUMAN	TSC1_HUMAN	TSC1	1.85464	1.36185	0.461969	-1.01369
sp|Q13642|FHL1_HUMAN	FHL1_HUMAN	FHL1	7.18654	2.68077	0.459798	1.11485
sp|Q8IWZ3|ANKH1_HUMAN	ANKH1_HUMAN	ANKHD1	4.72502	2.17371	0.457747	2.0044
sp|Q14241|ELOA1_HUMAN	ELOA1_HUMAN	ELOA	5.1338	2.26579	0.457227	1.5746
sp|Q96KP1|EXOC2_HUMAN	EXOC2_HUMAN	EXOC2	0	0	0.457055	-1.05861
sp|Q14674|ESPL1_HUMAN	ESPL1_HUMAN	ESPL1	0	0	0.456744	1.00887
sp|P49674|KC1E_HUMAN	KC1E_HUMAN	CSNK1E	9.99968	3.16223	0.455859	0.783923
sp|Q8N0Z3|SPICE_HUMAN	SPICE_HUMAN	SPICE1	3.88024	1.96983	0.451281	1.33505
sp|Q14008|CKAP5_HUMAN	CKAP5_HUMAN	CKAP5	5.86894	2.42259	0.449678	1.84851
sp|Q7Z589|EMSY_HUMAN	EMSY_HUMAN	EMSY	14.1807	3.76573	0.449601	1.46303
sp|P30876|RPB2_HUMAN	RPB2_HUMAN	POLR2B	3.53422	1.87995	0.44854	-1.45877
sp|P24928|RPB1_HUMAN	RPB1_HUMAN	POLR2A	5.2125	2.28309	0.442616	1.54911
sp|P49756|RBM25_HUMAN	RBM25_HUMAN	RBM25	5.18553	2.27717	0.437222	1.29516
sp|Q96EB1|ELP4_HUMAN	ELP4_HUMAN	ELP4	0	0	0.436721	0.748224
sp|P13804|ETFA_HUMAN	ETFA_HUMAN	ETFA	3.79364	1.94773	0.434784	-1.39126
sp|Q9HDC5|JPH1_HUMAN	JPH1_HUMAN	JPH1	3.49493	1.86947	0.434259	-0.906897
sp|P55036|PSMD4_HUMAN	PSMD4_HUMAN	PSMD4	1.19668	1.09393	0.434123	-1.59292
sp|P22392|NDKB_HUMAN;sp|O60361|NDK8_HUMAN	NDKB_HUMAN	NME2	0	0	0.433963	1.18704
sp|P55196|AFAD_HUMAN	AFAD_HUMAN	AFDN	11.5457	3.39789	0.432236	1.51184
sp|Q9BXK5|B2L13_HUMAN	B2L13_HUMAN	BCL2L13	4.36431	2.08909	0.432045	-0.815001
sp|Q8IY17|PLPL6_HUMAN	PLPL6_HUMAN	PNPLA6	2.31362	1.52106	0.430653	-1.54571
sp|Q9BQ48|RM34_HUMAN	RM34_HUMAN	MRPL34	7.11748	2.66786	0.427659	1.16908
sp|Q66PJ3|AR6P4_HUMAN	AR6P4_HUMAN	ARL6IP4	2.09892	1.44877	0.427275	1.29643
sp|O14737|PDCD5_HUMAN	PDCD5_HUMAN	PDCD5	2.2523	1.50077	0.426858	-0.640102
sp|Q9Y490|TLN1_HUMAN	TLN1_HUMAN	TLN1	7.39959	2.72022	0.426267	1.42424
sp|P46108|CRK_HUMAN	CRK_HUMAN	CRK	4.84835	2.2019	0.421482	0.809135
sp|P05141|ADT2_HUMAN	ADT2_HUMAN	SLC25A5	5.44626	2.33372	0.420964	-0.489808
sp|Q9Y4P8|WIPI2_HUMAN	WIPI2_HUMAN	WIPI2	4.37403	2.09142	0.42032	1.25361
sp|Q9UI10|EI2BD_HUMAN	EI2BD_HUMAN	EIF2B4	0	0	0.420276	0.781973
sp|O75663|TIPRL_HUMAN	TIPRL_HUMAN	TIPRL	1.49338	1.22204	0.420109	-1.11689
sp|Q562R1|ACTBL_HUMAN	ACTBL_HUMAN	#N/A	#N/A	#N/A	0.419758	1.19292
sp|P16403|H12_HUMAN	H12_HUMAN	HIST1H1C	34.5675	5.87941	0.419412	1.41891
sp|P46781|RS9_HUMAN	RS9_HUMAN	RPS9	3.30074	1.81679	0.417489	1.17045
sp|P26373|RL13_HUMAN	RL13_HUMAN	RPL13	4.11934	2.02962	0.417233	0.53595
sp|P84098|RL19_HUMAN	RL19_HUMAN	RPL19	6.07729	2.46522	0.416817	0.429482
sp|Q9UL54|TAOK2_HUMAN	TAOK2_HUMAN	TAOK2	3.15264	1.77557	0.416049	-1.34539
sp|P62910|RL32_HUMAN	RL32_HUMAN	RPL32	3.40978	1.84656	0.415916	0.959234
sp|Q96PV7|F193B_HUMAN	F193B_HUMAN	#N/A	#N/A	#N/A	0.41472	-0.398552
sp|Q9NSE4|SYIM_HUMAN	SYIM_HUMAN	IARS2	2.1539	1.46762	0.410981	-1.55652
sp|O43491|E41L2_HUMAN	E41L2_HUMAN	EPB41L2	3.73929	1.93373	0.410591	-1.14173
sp|P30048|PRDX3_HUMAN	PRDX3_HUMAN	PRDX3	0	0	0.409917	-0.966192
sp|P49257|LMAN1_HUMAN	LMAN1_HUMAN	LMAN1	1.06907	1.03396	0.409729	-1.62971
sp|O75694|NU155_HUMAN	NU155_HUMAN	NUP155	2.16456	1.47124	0.409366	-1.44019
sp|Q9GZR7|DDX24_HUMAN	DDX24_HUMAN	DDX24	5.747	2.39729	0.408902	1.37478
sp|Q07065|CKAP4_HUMAN	CKAP4_HUMAN	CKAP4	5.54676	2.35516	0.408133	0.87597
sp|P23396|RS3_HUMAN	RS3_HUMAN	RPS3	4.38499	2.09404	0.407911	1.1367
sp|Q9Y2X9|ZN281_HUMAN	ZN281_HUMAN	ZNF281	1.85693	1.36269	0.407276	1.0202
sp|Q15361|TTF1_HUMAN	TTF1_HUMAN	TTF1	4.72603	2.17394	0.406265	1.48636
sp|Q3YEC7|RABL6_HUMAN	RABL6_HUMAN	RABL6	3.06313	1.75018	0.403672	1.27773
sp|O15294|OGT1_HUMAN	OGT1_HUMAN	OGT	1.37078	1.1708	0.400115	-0.977984
sp|Q14980|NUMA1_HUMAN	NUMA1_HUMAN	NUMA1	3.82513	1.95579	0.393602	-1.46932
sp|E9PAV3|NACAM_HUMAN;sp|Q13765|NACA_HUMAN	NACAM_HUMAN	NACA	7.86904	2.80518	0.390932	1.30589
sp|Q53EZ4|CEP55_HUMAN	CEP55_HUMAN	CEP55	2.22483	1.49159	0.390804	0.631475
sp|P18085|ARF4_HUMAN	ARF4_HUMAN	ARF4	16.144	4.01796	0.390409	0.633124
sp|Q6WKZ4|RFIP1_HUMAN	RFIP1_HUMAN	RAB11FIP1	2.43256	1.55967	0.39012	-1.16849
sp|Q8IWJ2|GCC2_HUMAN	GCC2_HUMAN	GCC2	6.50472	2.55043	0.389303	-1.72118
sp|Q92522|H1X_HUMAN	H1X_HUMAN	H1FX	3.68361	1.91927	0.387928	1.23562
sp|Q9BZF3|OSBL6_HUMAN	OSBL6_HUMAN	OSBPL6	3.93095	1.98266	0.386103	1.18348
sp|O95721|SNP29_HUMAN	SNP29_HUMAN	SNAP29	3.77308	1.94244	0.385867	0.993473
sp|P78344|IF4G2_HUMAN	IF4G2_HUMAN	EIF4G2	2.49168	1.5785	0.385842	-1.30608
sp|Q14596|NBR1_HUMAN	NBR1_HUMAN	NBR1	0	0	0.381166	0.7089
sp|Q9GZY8|MFF_HUMAN	MFF_HUMAN	MFF	3.41086	1.84685	0.379513	1.16612
sp|P62263|RS14_HUMAN	RS14_HUMAN	RPS14	3.00583	1.73373	0.378123	0.937033
sp|Q9Y5K6|CD2AP_HUMAN	CD2AP_HUMAN	CD2AP	2.12892	1.45908	0.375153	-1.23812
sp|O15173|PGRC2_HUMAN	PGRC2_HUMAN	PGRMC2	2.97846	1.72582	0.374934	-0.505254
sp|P52292|IMA1_HUMAN	IMA1_HUMAN	KPNA2	0	0	0.374919	-0.848263
sp|Q969Q0|RL36L_HUMAN	RL36L_HUMAN	RPL36AL	11.1071	3.33273	0.373392	1.21942
sp|O75396|SC22B_HUMAN	SC22B_HUMAN	SEC22B	0	0	0.372094	0.685476
sp|Q9H2H9|S38A1_HUMAN	S38A1_HUMAN	SLC38A1	2.07643	1.44098	0.371148	-1.42366
sp|P84077|ARF1_HUMAN;sp|P61204|ARF3_HUMAN	ARF1_HUMAN	ARF1	3.02766	1.74002	0.370598	0.603631
sp|P61513|RL37A_HUMAN	RL37A_HUMAN	RPL37A	4.94296	2.22328	0.365846	0.80007
sp|Q92997|DVL3_HUMAN	DVL3_HUMAN	DVL3	2.00485	1.41593	0.365559	-1.19506
sp|Q9Y2R4|DDX52_HUMAN	DDX52_HUMAN	DDX52	3.57893	1.89181	0.365544	0.839035
sp|Q9H7Z3|NRDE2_HUMAN	NRDE2_HUMAN	NRDE2	0.836785	0.914759	0.360914	-1.10697
sp|P62826|RAN_HUMAN	RAN_HUMAN	RAN	0	0	0.35931	-0.918142
sp|Q9NVU7|SDA1_HUMAN	SDA1_HUMAN	SDAD1	2.22012	1.49001	0.358702	-1.5476
sp|Q8NE71|ABCF1_HUMAN	ABCF1_HUMAN	ABCF1	4.43489	2.10592	0.355635	0.836091
sp|P21397|AOFA_HUMAN	AOFA_HUMAN	MAOA	1.63301	1.27789	0.351949	-1.85282
sp|Q15637|SF01_HUMAN	SF01_HUMAN	SF1	0	0	0.350776	0.63396
sp|Q15643|TRIPB_HUMAN	TRIPB_HUMAN	TRIP11	7.12078	2.66848	0.349743	1.48735
sp|P04075|ALDOA_HUMAN	ALDOA_HUMAN	ALDOA	29.7313	5.45264	0.349618	0.970446
sp|P27816|MAP4_HUMAN	MAP4_HUMAN	MAP4	2.35773	1.53549	0.349449	-1.3021
sp|Q9ULE6|PALD_HUMAN	PALD_HUMAN	PALD1	1.92549	1.38762	0.348114	-1.19183
sp|Q9UHK0|NUFP1_HUMAN	NUFP1_HUMAN	NUFIP1	0	0	0.34707	0.595201
sp|P53597|SUCA_HUMAN	SUCA_HUMAN	SUCLG1	6.94355	2.63506	0.345864	0.615436
sp|Q6Y7W6|GGYF2_HUMAN	GGYF2_HUMAN	GIGYF2	5.53781	2.35326	0.34518	1.03362
sp|Q9HB21|PKHA1_HUMAN	PKHA1_HUMAN	PLEKHA1	20.598	4.53851	0.342994	0.520171
sp|P05556|ITB1_HUMAN	ITB1_HUMAN	ITGB1	4.07064	2.01758	0.341294	1.21594
sp|P07814|SYEP_HUMAN	SYEP_HUMAN	EPRS	0	0	0.340743	-1.13481
sp|Q9Y3C1|NOP16_HUMAN	NOP16_HUMAN	NOP16	4.62575	2.15076	0.338445	0.918422
sp|Q9P2E9|RRBP1_HUMAN	RRBP1_HUMAN	RRBP1	2.07672	1.44108	0.338018	-1.60615
sp|Q9P0K7|RAI14_HUMAN	RAI14_HUMAN	RAI14	4.16079	2.0398	0.337562	1.20565
sp|Q9Y265|RUVB1_HUMAN	RUVB1_HUMAN	RUVBL1	2.71472	1.64764	0.337297	-1.10366
sp|Q8IZH2|XRN1_HUMAN	XRN1_HUMAN	XRN1	5.21519	2.28368	0.337233	1.43399
sp|Q96JH7|VCIP1_HUMAN	VCIP1_HUMAN	VCPIP1	2.93716	1.71382	0.335827	-1.42527
sp|Q9NX40|OCAD1_HUMAN	OCAD1_HUMAN	OCIAD1	3.07654	1.75401	0.335052	0.757782
sp|P62851|RS25_HUMAN	RS25_HUMAN	RPS25	3.2462	1.80172	0.334034	0.715222
sp|Q9Y6A5|TACC3_HUMAN	TACC3_HUMAN	TACC3	0	0	0.332289	-0.331304
sp|O95861|BPNT1_HUMAN	BPNT1_HUMAN	BPNT1	2.94333	1.71561	0.328812	0.752622
sp|O75410|TACC1_HUMAN	TACC1_HUMAN	TACC1	2.31602	1.52185	0.326816	1.38965
sp|Q86UB9|TM135_HUMAN	TM135_HUMAN	TMEM135	0	0	0.325542	-0.825012
sp|Q13439|GOGA4_HUMAN	GOGA4_HUMAN	GOLGA4	8.43439	2.9042	0.324457	1.65887
sp|Q14677|EPN4_HUMAN	EPN4_HUMAN	CLINT1	3.12518	1.76782	0.324246	1.0753
sp|P50851|LRBA_HUMAN	LRBA_HUMAN	LRBA	3.53395	1.87988	0.323681	-1.35522
sp|P81605|DCD_HUMAN	DCD_HUMAN	DCD	5.00751	2.23775	0.322785	-0.937499
sp|Q9BZF9|UACA_HUMAN	UACA_HUMAN	UACA	4.63476	2.15285	0.321775	1.04182
sp|P62847|RS24_HUMAN	RS24_HUMAN	RPS24	4.26348	2.06482	0.319546	-0.495282
sp|Q9UJF2|NGAP_HUMAN	NGAP_HUMAN	RASAL2	4.50116	2.12159	0.318597	1.14193
sp|P16615|AT2A2_HUMAN	AT2A2_HUMAN	ATP2A2	5.50559	2.3464	0.314604	-1.07848
sp|Q9BSJ8|ESYT1_HUMAN	ESYT1_HUMAN	ESYT1	3.46187	1.86061	0.314278	-1.10618
sp|Q8NBA8|DTWD2_HUMAN	DTWD2_HUMAN	DTWD2	0	0	0.314033	0.637628
sp|Q9NZZ3|CHMP5_HUMAN	CHMP5_HUMAN	CHMP5	1.8119	1.34607	0.309611	0.741043
sp|P50991|TCPD_HUMAN	TCPD_HUMAN	CCT4	2.39786	1.5485	0.308689	-0.537407
sp|Q14974|IMB1_HUMAN	IMB1_HUMAN	KPNB1	0	0	0.308066	-0.928804
sp|P07355|ANXA2_HUMAN;sp|A6NMY6|AXA2L_HUMAN	ANXA2_HUMAN	ANXA2	5.22946	2.2868	0.306104	0.773167
sp|Q9BZI7|REN3B_HUMAN	REN3B_HUMAN	UPF3B	20.0264	4.47509	0.305076	0.766782
sp|P00387|NB5R3_HUMAN	NB5R3_HUMAN	CYB5R3	0	0	0.304585	0.52915
sp|Q7Z434|MAVS_HUMAN	MAVS_HUMAN	MAVS	5.35683	2.31448	0.30291	0.459617
sp|Q5SW79|CE170_HUMAN	CE170_HUMAN	CEP170	1.72511	1.31344	0.302875	-1.29972
sp|Q9Y2X3|NOP58_HUMAN	NOP58_HUMAN	NOP58	2.90739	1.70511	0.299283	0.771386
sp|P42694|HELZ_HUMAN	HELZ_HUMAN	HELZ	1.18874	1.09029	0.299268	-0.855532
sp|Q96AY4|TTC28_HUMAN	TTC28_HUMAN	TTC28	5.05552	2.24845	0.298402	1.36666
sp|P82094|TMF1_HUMAN	TMF1_HUMAN	TMF1	1.03965	1.01963	0.296624	-0.90772
sp|Q9Y450|HBS1L_HUMAN	HBS1L_HUMAN	HBS1L	2.70906	1.64592	0.296024	-0.851741
sp|P07195|LDHB_HUMAN	LDHB_HUMAN	LDHB	1.70699	1.30652	0.294603	-0.774477
sp|P36578|RL4_HUMAN	RL4_HUMAN	RPL4	1.98554	1.40909	0.293494	0.77333
sp|Q5T8D3|ACBD5_HUMAN	ACBD5_HUMAN	ACBD5	2.70343	1.64421	0.292705	-0.902583
sp|Q9HCD6|TANC2_HUMAN	TANC2_HUMAN	TANC2	0	0	0.292661	-0.598105
sp|O15126|SCAM1_HUMAN	SCAM1_HUMAN	SCAMP1	1.4274	1.19474	0.288312	-0.841232
sp|P07737|PROF1_HUMAN	PROF1_HUMAN	PFN1	2.48419	1.57613	0.28812	0.876465
sp|Q9BXW9|FACD2_HUMAN	FACD2_HUMAN	FANCD2	0	0	0.28713	-0.692224
sp|Q9H4L5|OSBL3_HUMAN	OSBL3_HUMAN	OSBPL3	3.71239	1.92676	0.287048	0.935281
sp|Q15058|KIF14_HUMAN	KIF14_HUMAN	KIF14	7.8661	2.80466	0.286678	1.248
sp|P62266|RS23_HUMAN	RS23_HUMAN	RPS23	9.99755	3.16189	0.285604	0.410457
sp|Q5SVZ6|ZMYM1_HUMAN	ZMYM1_HUMAN	ZMYM1	5.10015	2.25835	0.281332	1.01771
sp|Q9Y217|MTMR6_HUMAN	MTMR6_HUMAN	MTMR6	0	0	0.280622	-0.521582
sp|Q9HD67|MYO10_HUMAN	MYO10_HUMAN	MYO10	1.48222	1.21747	0.27728	-0.860836
sp|Q13325|IFIT5_HUMAN	IFIT5_HUMAN	IFIT5	2.5308	1.59085	0.276586	0.643892
sp|P52306|GDS1_HUMAN	GDS1_HUMAN	RAP1GDS1	6.1501	2.47994	0.275705	-1.48949
sp|Q9UGI8|TES_HUMAN	TES_HUMAN	TES	50.0885	7.07732	0.274839	0.383955
sp|P62269|RS18_HUMAN	RS18_HUMAN	RPS18	2.91941	1.70863	0.273432	-0.681271
sp|Q9Y394|DHRS7_HUMAN	DHRS7_HUMAN	DHRS7	6.52964	2.55532	0.271223	0.811871
sp|B2RTY4|MYO9A_HUMAN	MYO9A_HUMAN	MYO9A	8.7094	2.95117	0.270531	-0.749468
sp|Q86UK7|ZN598_HUMAN	ZN598_HUMAN	ZNF598	2.05789	1.43453	0.26906	0.758575
sp|Q5JTW2|CEP78_HUMAN	CEP78_HUMAN	CEP78	4.16037	2.0397	0.268299	0.956629
sp|P15880|RS2_HUMAN	RS2_HUMAN	RPS2	3.64682	1.90966	0.2679	0.540992
sp|Q14160|SCRIB_HUMAN	SCRIB_HUMAN	SCRIB	0	0	0.267741	-1.01784
sp|Q8IZJ1|UNC5B_HUMAN	UNC5B_HUMAN	UNC5B	0	0	0.265219	-0.91124
sp|Q9UMY1|NOL7_HUMAN	NOL7_HUMAN	NOL7	0	0	0.264755	0.47842
sp|Q96HE9|PRR11_HUMAN	PRR11_HUMAN	PRR11	20.9964	4.58218	0.264536	0.571105
sp|Q9Y3L5|RAP2C_HUMAN	RAP2C_HUMAN	RAP2C	0	0	0.26273	-0.693433
sp|O14966|RAB7L_HUMAN	RAB7L_HUMAN	RAB29	2.85572	1.68989	0.260626	0.657489
sp|Q96GA3|LTV1_HUMAN	LTV1_HUMAN	LTV1	7.90957	2.8124	0.260443	0.896942
sp|Q7Z6Z7|HUWE1_HUMAN	HUWE1_HUMAN	HUWE1	6.97297	2.64064	0.259769	-0.981935
sp|Q8TCU4|ALMS1_HUMAN	ALMS1_HUMAN	ALMS1	7.71995	2.77848	0.259243	0.963269
sp|P07900|HS90A_HUMAN	HS90A_HUMAN	HSP90AA1	3.52914	1.8786	0.25906	-0.915744
sp|Q92974|ARHG2_HUMAN	ARHG2_HUMAN	ARHGEF2	132.606	11.5155	0.257105	0.941773
sp|Q86SQ0|PHLB2_HUMAN	PHLB2_HUMAN	PHLDB2	3.72741	1.93065	0.25667	0.813155
sp|P27824|CALX_HUMAN	CALX_HUMAN	CANX	2.48758	1.57721	0.255988	-0.890598
sp|Q12959|DLG1_HUMAN	DLG1_HUMAN	DLG1	0.897528	0.94738	0.253863	-0.671586
sp|P46109|CRKL_HUMAN	CRKL_HUMAN	CRKL	5.32355	2.30728	0.253602	0.618263
sp|O95372|LYPA2_HUMAN	LYPA2_HUMAN	LYPLA2	2.51637	1.58631	0.253231	-0.821842
sp|Q02040|AK17A_HUMAN	AK17A_HUMAN	AKAP17A	3.53922	1.88128	0.253157	0.955826
sp|O43592|XPOT_HUMAN	XPOT_HUMAN	XPOT	3.35561	1.83183	0.252047	0.591007
sp|Q9UNF1|MAGD2_HUMAN	MAGD2_HUMAN	MAGED2	0	0	0.249746	-0.713999
sp|P06733|ENOA_HUMAN	ENOA_HUMAN	ENO1	4.14446	2.03579	0.248291	0.74572
sp|Q06830|PRDX1_HUMAN	PRDX1_HUMAN	PRDX1	2.63133	1.62214	0.246153	0.372706
sp|O00213|APBB1_HUMAN	APBB1_HUMAN	APBB1	2.03099	1.42513	0.245723	0.790719
sp|Q9Y5V3|MAGD1_HUMAN	MAGD1_HUMAN	MAGED1	6.66076	2.58084	0.245714	0.436263
sp|Q96KG9|SCYL1_HUMAN	SCYL1_HUMAN	SCYL1	2.19349	1.48104	0.244913	-0.611592
sp|O94813|SLIT2_HUMAN	SLIT2_HUMAN	SLIT2	3.74006	1.93392	0.244182	-0.868396
sp|P20340|RAB6A_HUMAN	RAB6A_HUMAN	RAB6A	23.4817	4.84579	0.243815	-1.02194
sp|O75915|PRAF3_HUMAN	PRAF3_HUMAN	ARL6IP5	0.868849	0.932121	0.241185	-0.674758
sp|Q9UPS8|ANR26_HUMAN	ANR26_HUMAN	ANKRD26	6.01346	2.45224	0.240853	0.840475
sp|Q5VT06|CE350_HUMAN	CE350_HUMAN	CEP350	5.24418	2.29002	0.240744	0.748572
sp|P42167|LAP2B_HUMAN	LAP2B_HUMAN	TMPO	4.55897	2.13518	0.24011	0.439637
sp|P23528|COF1_HUMAN	COF1_HUMAN	CFL1	1.46876	1.21192	0.235957	-0.643835
sp|Q7Z6K5|ARPIN_HUMAN	ARPIN_HUMAN	ARPIN	1.57376	1.25449	0.235232	-0.841331
sp|Q5JRA6|MIA3_HUMAN	MIA3_HUMAN	MIA3	1.16598	1.07981	0.233251	-0.836023
sp|Q9H3N1|TMX1_HUMAN	TMX1_HUMAN	TMX1	0.646545	0.80408	0.231757	-0.933443
sp|P62937|PPIA_HUMAN	PPIA_HUMAN	PPIA	0	0	0.230167	0.641585
sp|Q5THJ4|VP13D_HUMAN	VP13D_HUMAN	VPS13D	4.0735	2.01829	0.229226	-1.14741
sp|Q15758|AAAT_HUMAN	AAAT_HUMAN	SLC1A5	3.27855	1.81068	0.228984	-0.521002
sp|Q14331|FRG1_HUMAN	FRG1_HUMAN	FRG1	2.06316	1.43637	0.228915	0.698139
sp|Q7Z4H7|HAUS6_HUMAN	HAUS6_HUMAN	HAUS6	4.3898	2.09519	0.228392	1.13044
sp|P40926|MDHM_HUMAN	MDHM_HUMAN	MDH2	0	0	0.227191	0.548984
sp|Q70CQ3|UBP30_HUMAN	UBP30_HUMAN	USP30	2.6706	1.6342	0.225836	0.704614
sp|P04181|OAT_HUMAN	OAT_HUMAN	OAT	4.62859	2.15142	0.224481	0.370289
sp|Q9HCU5|PREB_HUMAN	PREB_HUMAN	PREB	2.23831	1.4961	0.222628	-0.653514
sp|Q71RC2|LARP4_HUMAN	LARP4_HUMAN	LARP4	1.01505	1.00749	0.221369	-0.676282
sp|Q5T8P6|RBM26_HUMAN	RBM26_HUMAN	RBM26	1.48659	1.21926	0.221231	-0.633763
sp|P49792|RBP2_HUMAN	RBP2_HUMAN	RANBP2	3.78337	1.94509	0.220735	-1.10939
sp|Q07020|RL18_HUMAN	RL18_HUMAN	RPL18	5.28724	2.2994	0.218964	0.703573
sp|Q86TP1|PRUNE_HUMAN	PRUNE_HUMAN	PRUNE1	0	0	0.217835	0.377249
sp|P12004|PCNA_HUMAN	PCNA_HUMAN	PCNA	2.68356	1.63816	0.217042	0.480675
sp|Q92575|UBXN4_HUMAN	UBXN4_HUMAN	UBXN4	3.30739	1.81862	0.214662	0.502341
sp|Q6WCQ1|MPRIP_HUMAN	MPRIP_HUMAN	MPRIP	188.35	13.7241	0.211835	0.417089
sp|Q9Y3F4|STRAP_HUMAN	STRAP_HUMAN	STRAP	3.32235	1.82273	0.211194	-0.485609
sp|P61978|HNRPK_HUMAN	HNRPK_HUMAN	HNRNPK	3.44247	1.85539	0.210868	-0.637373
sp|Q6ZUT1|CK057_HUMAN	CK057_HUMAN	NKAPD1	2.73527	1.65387	0.210242	0.460927
sp|Q96HS1|PGAM5_HUMAN	PGAM5_HUMAN	PGAM5	2.36318	1.53727	0.208234	0.479692
sp|Q9NQC3|RTN4_HUMAN	RTN4_HUMAN	RTN4	0.707136	0.840914	0.207396	-0.843584
sp|Q14789|GOGB1_HUMAN	GOGB1_HUMAN	GOLGB1	7.56766	2.75094	0.207335	0.922154
sp|Q3SY69|AL1L2_HUMAN	AL1L2_HUMAN	ALDH1L2	1.7002	1.30392	0.206796	-0.725727
sp|P63010|AP2B1_HUMAN	AP2B1_HUMAN	AP2B1	1.41233	1.18842	0.20566	0.41953
sp|P48643|TCPE_HUMAN	TCPE_HUMAN	CCT5	0	0	0.205446	-0.582688
sp|O95613|PCNT_HUMAN	PCNT_HUMAN	PCNT	0	0	0.20489	-0.864548
sp|O75534|CSDE1_HUMAN	CSDE1_HUMAN	CSDE1	2.38474	1.54426	0.204297	-0.874322
sp|P23284|PPIB_HUMAN	PPIB_HUMAN	PPIB	0	0	0.20233	0.465438
sp|O00443|P3C2A_HUMAN	P3C2A_HUMAN	PIK3C2A	7.69739	2.77442	0.201068	0.831488
sp|Q86UP2|KTN1_HUMAN	KTN1_HUMAN	KTN1	7.16767	2.67725	0.19877	0.427008
sp|Q9Y5Z9|UBIA1_HUMAN	UBIA1_HUMAN	UBIAD1	0	0	0.194877	0.520592
sp|P51610|HCFC1_HUMAN	HCFC1_HUMAN	HCFC1	5.19457	2.27916	0.194247	0.832049
sp|Q9HAD4|WDR41_HUMAN	WDR41_HUMAN	WDR41	1.2156	1.10254	0.193748	-0.711974
sp|Q9ULM3|YETS2_HUMAN	YETS2_HUMAN	YEATS2	9.88443	3.14395	0.192591	-0.728901
sp|Q7Z5P9|MUC19_HUMAN	MUC19_HUMAN	MUC19	0	0	0.190531	1.05428
sp|O60884|DNJA2_HUMAN	DNJA2_HUMAN	DNAJA2	0	0	0.186899	-0.447324
sp|P62273|RS29_HUMAN	RS29_HUMAN	RPS29	3.48836	1.86772	0.186576	0.835104
sp|Q9UM54|MYO6_HUMAN	MYO6_HUMAN	MYO6	0.871328	0.93345	0.185745	-0.567822
sp|Q99442|SEC62_HUMAN	SEC62_HUMAN	SEC62	1.75115	1.32331	0.184777	0.792753
sp|P68431|H31_HUMAN;sp|Q71DI3|H32_HUMAN;sp|Q16695|H31T_HUMAN;sp|P84243|H33_HUMAN;sp|Q6NXT2|H3C_HUMAN	H31_HUMAN	HIST1H3A	0	0	0.184709	0.675391
sp|P83881|RL36A_HUMAN	RL36A_HUMAN	RPL36A	12.411	3.52293	0.182574	-0.245286
sp|Q9NQG6|MID51_HUMAN	MID51_HUMAN	MIEF1	7.2051	2.68423	0.18249	0.522853
sp|Q86UE4|LYRIC_HUMAN	LYRIC_HUMAN	MTDH	2.38995	1.54595	0.182211	-0.603237
sp|P13861|KAP2_HUMAN	KAP2_HUMAN	PRKAR2A	2.85962	1.69104	0.180358	0.615887
sp|P45880|VDAC2_HUMAN	VDAC2_HUMAN	VDAC2	0	0	0.180333	-0.704061
sp|Q99733|NP1L4_HUMAN	NP1L4_HUMAN	NAP1L4	0	0	0.178717	-0.506891
sp|Q15056|IF4H_HUMAN	IF4H_HUMAN	EIF4H	2.38455	1.5442	0.177549	0.576679
sp|P05109|S10A8_HUMAN	S10A8_HUMAN	S100A8	7.6765	2.77065	0.175785	-0.424406
sp|O60488|ACSL4_HUMAN	ACSL4_HUMAN	ACSL4	1.27372	1.12859	0.17319	-0.411258
sp|O43169|CYB5B_HUMAN	CYB5B_HUMAN	CYB5B	0.819284	0.905143	0.170364	-0.622961
sp|Q9BVC6|TM109_HUMAN	TM109_HUMAN	TMEM109	0	0	0.170025	-0.386577
sp|Q8TDD1|DDX54_HUMAN	DDX54_HUMAN	DDX54	2.47002	1.57163	0.169445	-0.840183
sp|Q8N2F6|ARM10_HUMAN	ARM10_HUMAN	ARMC10	1.97085	1.40387	0.169204	-0.555529
sp|Q5TC12|ATPF1_HUMAN	ATPF1_HUMAN	ATPAF1	3.48456	1.8667	0.166798	0.541832
sp|Q9BZF1|OSBL8_HUMAN	OSBL8_HUMAN	OSBPL8	0	0	0.16676	0.397445
sp|Q562F6|SGO2_HUMAN	SGO2_HUMAN	SGO2	10.0224	3.16582	0.16553	0.720435
sp|Q9UBM7|DHCR7_HUMAN	DHCR7_HUMAN	DHCR7	2.34748	1.53215	0.163526	0.557892
sp|P11586|C1TC_HUMAN	C1TC_HUMAN	MTHFD1	2.28091	1.51027	0.163461	-0.630874
sp|P62280|RS11_HUMAN	RS11_HUMAN	RPS11	3.63865	1.90752	0.163041	0.564366
sp|Q96AG4|LRC59_HUMAN	LRC59_HUMAN	LRRC59	3.14452	1.77328	0.162321	0.379818
sp|P62820|RAB1A_HUMAN	RAB1A_HUMAN	RAB1A	4.16515	2.04087	0.161804	0.452042
sp|O15498|YKT6_HUMAN	YKT6_HUMAN	YKT6	5.17525	2.27492	0.160429	-0.226154
sp|Q9BQ52|RNZ2_HUMAN	RNZ2_HUMAN	ELAC2	0	0	0.157596	0.410901
sp|P38432|COIL_HUMAN	COIL_HUMAN	COIL	0	0	0.157136	0.318634
sp|P56182|RRP1_HUMAN	RRP1_HUMAN	RRP1	3.81068	1.9521	0.156062	0.512056
sp|P32780|TF2H1_HUMAN	TF2H1_HUMAN	GTF2H1	5.58722	2.36373	0.155655	-0.33714
sp|Q9NRN7|ADPPT_HUMAN	ADPPT_HUMAN	AASDHPPT	0	0	0.154484	-0.282465
sp|P06576|ATPB_HUMAN	ATPB_HUMAN	ATP5F1B	3.89823	1.97439	0.154114	0.41021
sp|Q6P1L8|RM14_HUMAN	RM14_HUMAN	MRPL14	0	0	0.153869	0.243089
sp|P05023|AT1A1_HUMAN	AT1A1_HUMAN	ATP1A1	3.52829	1.87837	0.152667	-0.514603
sp|Q8N2A8|PLD6_HUMAN	PLD6_HUMAN	PLD6	0	0	0.15202	-0.405168
sp|Q99623|PHB2_HUMAN	PHB2_HUMAN	PHB2	0	0	0.151497	-0.603601
sp|Q5JTH9|RRP12_HUMAN	RRP12_HUMAN	RRP12	8.13584	2.85234	0.151271	-0.226604
sp|Q92667|AKAP1_HUMAN	AKAP1_HUMAN	AKAP1	9.16216	3.02691	0.150876	-0.263414
sp|P21127|CD11B_HUMAN;sp|Q9UQ88|CD11A_HUMAN	CD11B_HUMAN	CDK11B	0	0	0.150696	-0.405316
sp|P18206|VINC_HUMAN	VINC_HUMAN	VCL	13.4306	3.66478	0.147777	-0.643561
sp|P18031|PTN1_HUMAN	PTN1_HUMAN	PTPN1	3.89458	1.97347	0.147018	0.222409
sp|O95470|SGPL1_HUMAN	SGPL1_HUMAN	SGPL1	4.97368	2.23017	0.14658	0.62006
sp|Q8N0X7|SPG20_HUMAN	SPG20_HUMAN	SPART	0.661438	0.813288	0.146305	-0.485661
sp|Q9BW92|SYTM_HUMAN	SYTM_HUMAN	TARS2	15.7906	3.97374	0.146187	0.417309
sp|Q8WVS4|WDR60_HUMAN	WDR60_HUMAN	WDR60	3.48183	1.86597	0.144163	0.550507
sp|Q9ULH7|MKL2_HUMAN	MKL2_HUMAN	MRTFB	3.78458	1.9454	0.142677	0.55806
sp|Q9Y679|AUP1_HUMAN	AUP1_HUMAN	AUP1	4.66701	2.16033	0.142475	-0.443567
sp|P11717|MPRI_HUMAN	MPRI_HUMAN	IGF2R	3.89687	1.97405	0.141771	0.568503
sp|P62979|RS27A_HUMAN;sp|P0CG47|UBB_HUMAN;sp|P0CG48|UBC_HUMAN	RS27A_HUMAN	RPS27A	4.9981	2.23564	0.140241	-0.139569
sp|P00338|LDHA_HUMAN	LDHA_HUMAN	LDHA	1.54607	1.24341	0.138102	-0.478134
sp|P31943|HNRH1_HUMAN	HNRH1_HUMAN	HNRNPH1	0	0	0.137393	0.189318
sp|P60891|PRPS1_HUMAN;sp|P21108|PRPS3_HUMAN;sp|P11908|PRPS2_HUMAN	PRPS1_HUMAN	PRPS1	2.74399	1.6565	0.136919	0.336874
sp|P33981|TTK_HUMAN	TTK_HUMAN	TTK	3.9063	1.97644	0.136636	0.523874
sp|P46939|UTRO_HUMAN	UTRO_HUMAN	UTRN	4.01006	2.00251	0.135128	-0.720961
sp|P04406|G3P_HUMAN	G3P_HUMAN	GAPDH	1.4142	1.1892	0.133529	-0.477278
sp|Q15366|PCBP2_HUMAN	PCBP2_HUMAN	PCBP2	2.38861	1.54551	0.133053	0.30864
sp|Q8IXI1|MIRO2_HUMAN	MIRO2_HUMAN	RHOT2	1.61658	1.27145	0.132883	-0.445226
sp|Q14C86|GAPD1_HUMAN	GAPD1_HUMAN	GAPVD1	7.40956	2.72205	0.132245	-0.675492
sp|P62917|RL8_HUMAN	RL8_HUMAN	RPL8	4.65586	2.15775	0.132216	0.475131
sp|O00541|PESC_HUMAN	PESC_HUMAN	PES1	3.42108	1.84962	0.132085	0.434365
sp|P10809|CH60_HUMAN	CH60_HUMAN	HSPD1	2.98802	1.72859	0.131923	-0.461844
sp|P17987|TCPA_HUMAN	TCPA_HUMAN	TCP1	2.87339	1.69511	0.130981	0.51573
sp|Q8TER5|ARH40_HUMAN	ARH40_HUMAN	ARHGEF40	10.0064	3.1633	0.130949	0.283524
sp|P04843|RPN1_HUMAN	RPN1_HUMAN	RPN1	0	0	0.130675	-0.44695
sp|P40855|PEX19_HUMAN	PEX19_HUMAN	PEX19	4.97218	2.22984	0.130571	0.467969
sp|O14617|AP3D1_HUMAN	AP3D1_HUMAN	AP3D1	4.66881	2.16074	0.130357	-0.207233
sp|Q9H2G2|SLK_HUMAN	SLK_HUMAN	SLK	3.92785	1.98188	0.128346	0.564627
sp|Q13492|PICAL_HUMAN	PICAL_HUMAN	PICALM	0	0	0.128115	0.313365
sp|P23458|JAK1_HUMAN	JAK1_HUMAN	JAK1	0	0	0.12798	0.408779
sp|Q13371|PHLP_HUMAN	PHLP_HUMAN	PDCL	0.71743	0.847012	0.127283	-0.505801
sp|Q14126|DSG2_HUMAN	DSG2_HUMAN	DSG2	1.17594	1.08441	0.126124	0.434732
sp|Q6UB35|C1TM_HUMAN	C1TM_HUMAN	MTHFD1L	1.95115	1.39684	0.124676	-0.361331
sp|Q9BXF6|RFIP5_HUMAN	RFIP5_HUMAN	RAB11FIP5	3.14203	1.77258	0.124261	0.480945
sp|Q9GZZ1|NAA50_HUMAN	NAA50_HUMAN	NAA50	0	0	0.123573	-0.181861
sp|Q8N5K1|CISD2_HUMAN	CISD2_HUMAN	CISD2	1.97934	1.40689	0.122964	-0.421784
sp|Q9UHQ9|NB5R1_HUMAN	NB5R1_HUMAN	CYB5R1	2.19056	1.48005	0.1216	-0.428821
sp|P10412|H14_HUMAN	H14_HUMAN	HIST1H1E	11.1344	3.33683	0.120401	0.265809
sp|Q9UJU6|DBNL_HUMAN	DBNL_HUMAN	DBNL	1.50387	1.22633	0.120186	0.208632
sp|Q7Z2W4|ZCCHV_HUMAN	ZCCHV_HUMAN	ZC3HAV1	6.37144	2.52417	0.119438	0.387024
sp|P62701|RS4X_HUMAN	RS4X_HUMAN	RPS4X	4.11524	2.02861	0.119219	0.22312
sp|Q13206|DDX10_HUMAN	DDX10_HUMAN	DDX10	4.01664	2.00416	0.119106	0.430805
sp|Q01650|LAT1_HUMAN	LAT1_HUMAN	SLC7A5	3.21205	1.79222	0.118471	-0.446444
sp|P62277|RS13_HUMAN	RS13_HUMAN	RPS13	1.81161	1.34596	0.117592	0.422877
sp|Q8IVF7|FMNL3_HUMAN	FMNL3_HUMAN	FMNL3	2.83452	1.6836	0.116512	0.488421
sp|O14654|IRS4_HUMAN	IRS4_HUMAN	IRS4	7.09687	2.66399	0.115037	0.602411
sp|P07305|H10_HUMAN	H10_HUMAN	H1F0	9.83011	3.1353	0.114305	0.466803
sp|Q9BY89|K1671_HUMAN	K1671_HUMAN	KIAA1671	5.977	2.44479	0.113077	-0.252854
sp|P40763|STAT3_HUMAN	STAT3_HUMAN	STAT3	1.35028	1.16202	0.11243	-0.347276
sp|Q5T6F2|UBAP2_HUMAN	UBAP2_HUMAN	UBAP2	3.11732	1.76559	0.112239	-0.380867
sp|Q5HYI7|MTX3_HUMAN	MTX3_HUMAN	MTX3	4.35821	2.08763	0.110399	0.364708
sp|P61247|RS3A_HUMAN	RS3A_HUMAN	RPS3A	3.74036	1.934	0.109604	0.452376
sp|P35613|BASI_HUMAN	BASI_HUMAN	BSG	1.58676	1.25967	0.108448	0.397824
sp|O75113|N4BP1_HUMAN	N4BP1_HUMAN	N4BP1	3.48881	1.86783	0.108209	0.470007
sp|Q6MZP7|LIN54_HUMAN	LIN54_HUMAN	LIN54	0	0	0.10536	-0.255197
sp|Q9Y6I9|TX264_HUMAN	TX264_HUMAN	TEX264	1.40693	1.18614	0.105054	-0.330397
sp|P51617|IRAK1_HUMAN	IRAK1_HUMAN	IRAK1	4.01075	2.00269	0.105013	0.346041
sp|P21333|FLNA_HUMAN	FLNA_HUMAN	FLNA	11.4421	3.38262	0.104158	0.325361
sp|Q8WY36|BBX_HUMAN	BBX_HUMAN	BBX	3.11004	1.76353	0.103815	0.432718
sp|Q16543|CDC37_HUMAN	CDC37_HUMAN	CDC37	0	0	0.101769	0.245945
sp|P36542|ATPG_HUMAN	ATPG_HUMAN	ATP5F1C	2.78113	1.66767	0.101046	0.374362
sp|P13639|EF2_HUMAN	EF2_HUMAN	EEF2	3.073	1.753	0.100541	-0.220076
sp|Q9Y5X1|SNX9_HUMAN	SNX9_HUMAN	SNX9	8.09202	2.84465	0.0997407	0.364466
sp|Q96A65|EXOC4_HUMAN	EXOC4_HUMAN	EXOC4	4.3966	2.09681	0.0996838	0.351263
sp|Q86Y07|VRK2_HUMAN	VRK2_HUMAN	VRK2	3.03915	1.74332	0.0980059	-0.171085
sp|P30041|PRDX6_HUMAN	PRDX6_HUMAN	PRDX6	0	0	0.096225	0.183202
sp|Q9Y2J2|E41L3_HUMAN	E41L3_HUMAN	EPB41L3	3.43409	1.85313	0.0929395	-0.366985
sp|Q5JTV8|TOIP1_HUMAN	TOIP1_HUMAN	TOR1AIP1	3.01105	1.73524	0.0912404	0.250316
sp|P32119|PRDX2_HUMAN	PRDX2_HUMAN	PRDX2	0	0	0.0911127	-0.146386
sp|O14828|SCAM3_HUMAN	SCAM3_HUMAN	SCAMP3	0	0	0.0910842	-0.214814
sp|Q9UGP4|LIMD1_HUMAN	LIMD1_HUMAN	LIMD1	0	0	0.0909153	0.20984
sp|Q9P035|HACD3_HUMAN	HACD3_HUMAN	HACD3	3.65245	1.91114	0.0901793	-0.139896
sp|Q96C19|EFHD2_HUMAN	EFHD2_HUMAN	EFHD2	2.0586	1.43478	0.0896186	0.314351
sp|Q9BR76|COR1B_HUMAN	COR1B_HUMAN	CORO1B	3.18289	1.78407	0.0886255	0.26601
sp|O14776|TCRG1_HUMAN	TCRG1_HUMAN	TCERG1	2.71005	1.64622	0.0881354	0.268483
sp|Q96S99|PKHF1_HUMAN	PKHF1_HUMAN	PLEKHF1	3.322	1.82264	0.0861728	-0.2297
sp|P39748|FEN1_HUMAN	FEN1_HUMAN	FEN1	0	0	0.0860255	-0.171871
sp|O95232|LC7L3_HUMAN	LC7L3_HUMAN	LUC7L3	2.02107	1.42164	0.085151	-0.243111
sp|P46782|RS5_HUMAN	RS5_HUMAN	RPS5	3.43788	1.85415	0.0851443	0.322726
sp|P12236|ADT3_HUMAN	ADT3_HUMAN	SLC25A6	3.81194	1.95242	0.0846329	-0.259562
sp|Q5VT66|MARC1_HUMAN	MARC1_HUMAN	MARC1	0	0	0.0843956	-0.283193
sp|A0FGR8|ESYT2_HUMAN	ESYT2_HUMAN	ESYT2	2.18169	1.47706	0.0824726	0.283618
sp|Q09666|AHNK_HUMAN	AHNK_HUMAN	AHNAK	7.51875	2.74203	0.0816529	0.341263
sp|Q00341|VIGLN_HUMAN	VIGLN_HUMAN	HDLBP	4.68255	2.16392	0.0790948	-0.392882
sp|O94991|SLIK5_HUMAN	SLIK5_HUMAN	SLITRK5	4.14537	2.03602	0.0790723	0.288674
sp|Q9UNQ2|DIM1_HUMAN	DIM1_HUMAN	DIMT1	3.75201	1.93701	0.0787228	0.149649
sp|Q14103|HNRPD_HUMAN	HNRPD_HUMAN	HNRNPD	0	0	0.0786746	0.158318
sp|Q92889|XPF_HUMAN	XPF_HUMAN	ERCC4	0	0	0.0785988	0.290241
sp|P11021|GRP78_HUMAN	GRP78_HUMAN	HSPA5	4.67863	2.16301	0.0779946	0.305876
sp|Q05682|CALD1_HUMAN	CALD1_HUMAN	CALD1	2.70687	1.64526	0.0757008	0.288766
sp|P11171|41_HUMAN	41_HUMAN	EPB41	4.23944	2.05899	0.0750606	-0.31412
sp|P11940|PABP1_HUMAN	PABP1_HUMAN	PABPC1	1.451	1.20458	0.0731088	0.188985
sp|O60841|IF2P_HUMAN	IF2P_HUMAN	EIF5B	4.25985	2.06394	0.0730359	0.271465
sp|Q9H2J7|S6A15_HUMAN	S6A15_HUMAN	SLC6A15	4.39457	2.09632	0.071372	0.154347
sp|Q96LT7|CI072_HUMAN	CI072_HUMAN	C9orf72	2.05378	1.4331	0.0711329	0.141215
sp|P51648|AL3A2_HUMAN	AL3A2_HUMAN	ALDH3A2	3.76697	1.94087	0.0709393	0.0835971
sp|Q9NZC7|WWOX_HUMAN	WWOX_HUMAN	WWOX	2.67682	1.6361	0.0696643	-0.215667
sp|Q9Y2Z0|SGT1_HUMAN	SGT1_HUMAN	SUGT1	3.52753	1.87817	0.0690994	-0.244674
sp|Q14247|SRC8_HUMAN	SRC8_HUMAN	CTTN	4.96213	2.22758	0.0689338	0.224117
sp|Q9Y4W2|LAS1L_HUMAN	LAS1L_HUMAN	LAS1L	1.95336	1.39763	0.0678055	0.167177
sp|Q9Y277|VDAC3_HUMAN	VDAC3_HUMAN	VDAC3	0	0	0.066802	-0.181304
sp|Q8N5F7|NKAP_HUMAN	NKAP_HUMAN	NKAP	1.74744	1.32191	0.0667007	-0.219377
sp|Q53H12|AGK_HUMAN	AGK_HUMAN	AGK	7.68147	2.77155	0.0666053	-0.251025
sp|Q92625|ANS1A_HUMAN	ANS1A_HUMAN	ANKS1A	14.3531	3.78855	0.0663103	0.220599
sp|Q9NVP1|DDX18_HUMAN	DDX18_HUMAN	DDX18	1.49696	1.2235	0.0650555	-0.303335
sp|P23588|IF4B_HUMAN	IF4B_HUMAN	EIF4B	1.95232	1.39725	0.0637978	-0.217638
sp|P27635|RL10_HUMAN	RL10_HUMAN	RPL10	5.77765	2.40367	0.0633794	-0.0814323
sp|P29597|TYK2_HUMAN	TYK2_HUMAN	TYK2	4.2573	2.06332	0.063058	0.262431
sp|Q8TEV9|SMCR8_HUMAN	SMCR8_HUMAN	SMCR8	3.20788	1.79106	0.0630146	0.314491
sp|P16401|H15_HUMAN	H15_HUMAN	HIST1H1B	0	0	0.0612932	0.21502
sp|Q8NDI1|EHBP1_HUMAN	EHBP1_HUMAN	EHBP1	4.42864	2.10443	0.0611133	0.165846
sp|Q96CS3|FAF2_HUMAN	FAF2_HUMAN	FAF2	0.997965	0.998982	0.0610925	0.195483
sp|Q9UHR5|S30BP_HUMAN	S30BP_HUMAN	SAP30BP	0	0	0.0598286	-0.143953
sp|P00558|PGK1_HUMAN	PGK1_HUMAN	PGK1	52.7314	7.26164	0.0594257	-0.0866543
sp|Q99614|TTC1_HUMAN	TTC1_HUMAN	TTC1	1.33207	1.15415	0.0593776	0.194798
sp|Q6P3W7|SCYL2_HUMAN	SCYL2_HUMAN	SCYL2	4.13503	2.03348	0.0590438	-0.261604
sp|O15027|SC16A_HUMAN	SC16A_HUMAN	SEC16A	0.862938	0.928944	0.058944	-0.211933
sp|Q4KMP7|TB10B_HUMAN	TB10B_HUMAN	TBC1D10B	8.92223	2.98701	0.0577343	0.19863
sp|Q04637|IF4G1_HUMAN	IF4G1_HUMAN	EIF4G1	5.06155	2.24979	0.0570637	-0.263863
sp|Q5JSL3|DOC11_HUMAN	DOC11_HUMAN	DOCK11	0	0	0.0566158	-0.261751
sp|Q96HC4|PDLI5_HUMAN	PDLI5_HUMAN	PDLIM5	2.02269	1.42221	0.056253	0.21023
sp|Q9H0S4|DDX47_HUMAN	DDX47_HUMAN	DDX47	0	0	0.0560771	0.165597
sp|Q9UNX4|WDR3_HUMAN	WDR3_HUMAN	WDR3	0	0	0.0559232	-0.155588
sp|Q15382|RHEB_HUMAN	RHEB_HUMAN	RHEB	0	0	0.0556557	0.336311
sp|Q53EU6|GPAT3_HUMAN	GPAT3_HUMAN	GPAT3	0	0	0.0541588	0.16463
sp|P62854|RS26_HUMAN;sp|Q5JNZ5|RS26L_HUMAN	RS26_HUMAN	RPS26	4.00354	2.00089	0.0541384	0.083115
sp|Q02952|AKA12_HUMAN	AKA12_HUMAN	AKAP12	2.9614	1.72087	0.0539397	0.260883
sp|Q9UHI8|ATS1_HUMAN	ATS1_HUMAN	ADAMTS1	1.54315	1.24223	0.0514712	-0.106114
sp|E9PRG8|CK098_HUMAN	CK098_HUMAN	C11orf98	11.1763	3.3431	0.0513422	-0.174054
sp|P47914|RL29_HUMAN	RL29_HUMAN	RPL29	3.14391	1.77311	0.0509986	-0.0998691
sp|Q6PKG0|LARP1_HUMAN	LARP1_HUMAN	LARP1	4.10164	2.02525	0.0504167	0.252823
sp|Q8WWM7|ATX2L_HUMAN	ATX2L_HUMAN	ATXN2L	1.92364	1.38695	0.0502787	-0.188381
sp|O43396|TXNL1_HUMAN	TXNL1_HUMAN	TXNL1	3.12998	1.76918	0.0498539	0.207619
sp|Q9BQG0|MBB1A_HUMAN	MBB1A_HUMAN	MYBBP1A	7.74796	2.78352	0.0481696	-0.0839441
sp|Q9HCM4|E41L5_HUMAN	E41L5_HUMAN	EPB41L5	3.08215	1.7556	0.0480437	-0.173616
sp|O96011|PX11B_HUMAN	PX11B_HUMAN	PEX11B	2.47643	1.57367	0.0474341	0.156445
sp|Q15907|RB11B_HUMAN	RB11B_HUMAN	RAB11B	0	0	0.0454375	-0.25831
sp|P62750|RL23A_HUMAN	RL23A_HUMAN	RPL23A	4.22314	2.05503	0.0406247	0.0581684
sp|P61758|PFD3_HUMAN	PFD3_HUMAN	VBP1	2.2385	1.49616	0.0402433	-0.103263
sp|Q7KZF4|SND1_HUMAN	SND1_HUMAN	SND1	3.19744	1.78814	0.040102	0.173241
sp|Q9Y2U8|MAN1_HUMAN	MAN1_HUMAN	LEMD3	0.620467	0.787697	0.0397431	0.156414
sp|Q9Y6K0|CEPT1_HUMAN	CEPT1_HUMAN	CEPT1	0	0	0.0396211	0.102975
sp|P43307|SSRA_HUMAN	SSRA_HUMAN	SSR1	0.590134	0.768202	0.0393357	0.17209
sp|O95210|STBD1_HUMAN	STBD1_HUMAN	STBD1	13.2327	3.63768	0.0383532	-0.109689
sp|P62424|RL7A_HUMAN	RL7A_HUMAN	RPL7A	0	0	0.0379099	-0.110137
sp|O43175|SERA_HUMAN	SERA_HUMAN	PHGDH	4.57382	2.13865	0.0376606	0.128901
sp|Q8WU79|SMAP2_HUMAN	SMAP2_HUMAN	SMAP2	0	0	0.0374191	-0.0763987
sp|O60762|DPM1_HUMAN	DPM1_HUMAN	DPM1	0	0	0.0354107	0.0997187
sp|P60842|IF4A1_HUMAN	IF4A1_HUMAN	EIF4A1	1.06772	1.03331	0.0352086	0.131219
sp|Q9Y383|LC7L2_HUMAN	LC7L2_HUMAN	LUC7L2	5.27624	2.29701	0.0347308	0.156361
sp|Q9BZE4|NOG1_HUMAN	NOG1_HUMAN	GTPBP4	2.84025	1.68531	0.0344796	0.15663
sp|Q8NG31|KNL1_HUMAN	KNL1_HUMAN	KNL1	5.59305	2.36496	0.0343245	-0.175355
sp|P22234|PUR6_HUMAN	PUR6_HUMAN	PAICS	0	0	0.0320622	-0.0643427
sp|P52655|TF2AA_HUMAN	TF2AA_HUMAN	#N/A	#N/A	#N/A	0.0319707	-0.0782218
sp|Q9H5V9|CX056_HUMAN	CX056_HUMAN	CXorf56	3.02073	1.73802	0.0314444	0.131646
sp|Q9UNZ2|NSF1C_HUMAN	NSF1C_HUMAN	NSFL1C	0	0	0.0304732	-0.0812927
sp|Q9Y385|UB2J1_HUMAN	UB2J1_HUMAN	UBE2J1	0	0	0.0298067	0.108292
sp|Q6PCB5|RSBNL_HUMAN	RSBNL_HUMAN	RSBN1L	3.35062	1.83047	0.0286516	-0.102761
sp|O43933|PEX1_HUMAN	PEX1_HUMAN	PEX1	3.16867	1.78008	0.0274447	0.122313
sp|P68363|TBA1B_HUMAN	TBA1B_HUMAN	TUBA1B	7.2011	2.68349	0.0257137	-0.0291453
sp|P35579|MYH9_HUMAN	MYH9_HUMAN	MYH9	5.08914	2.25591	0.0254346	-0.112095
sp|Q14498|RBM39_HUMAN	RBM39_HUMAN	RBM39	0	0	0.0232045	0.0533629
sp|P39023|RL3_HUMAN	RL3_HUMAN	RPL3	12.8547	3.58535	0.0217695	-0.0778059
sp|Q14139|UBE4A_HUMAN	UBE4A_HUMAN	UBE4A	1.76202	1.32741	0.021473	-0.0745044
sp|P78318|IGBP1_HUMAN	IGBP1_HUMAN	IGBP1	3.40439	1.8451	0.0211718	0.0447419
sp|Q15738|NSDHL_HUMAN	NSDHL_HUMAN	NSDHL	0.845451	0.919484	0.0202162	0.0759438
sp|P25205|MCM3_HUMAN	MCM3_HUMAN	MCM3	3.42074	1.84953	0.0191391	-0.0651063
sp|Q9UL25|RAB21_HUMAN	RAB21_HUMAN	RAB21	0	0	0.018776	0.048556
sp|Q8TEU7|RPGF6_HUMAN	RPGF6_HUMAN	RAPGEF6	2.69392	1.64132	0.0185335	0.083636
sp|P61026|RAB10_HUMAN	RAB10_HUMAN	RAB10	0	0	0.0181166	-0.0938443
sp|Q8WVX9|FACR1_HUMAN	FACR1_HUMAN	FAR1	0	0	0.0158507	-0.0338258
sp|P43121|MUC18_HUMAN	MUC18_HUMAN	MCAM	2.05277	1.43275	0.0151541	0.0426797
sp|Q13162|PRDX4_HUMAN	PRDX4_HUMAN	PRDX4	0	0	0.0149961	0.0413707
sp|P14625|ENPL_HUMAN	ENPL_HUMAN	HSP90B1	0	0	0.0148233	0.0578448
sp|O14641|DVL2_HUMAN	DVL2_HUMAN	DVL2	3.3454	1.82904	0.0138093	-0.0437478
sp|Q96D71|REPS1_HUMAN	REPS1_HUMAN	REPS1	0	0	0.0125171	-0.0245266
sp|P63244|RACK1_HUMAN	RACK1_HUMAN	RACK1	2.80197	1.67391	0.0123237	-0.050783
sp|Q9UG63|ABCF2_HUMAN	ABCF2_HUMAN	ABCF2	3.38978	1.84114	0.0120676	0.0499905
sp|P43487|RANG_HUMAN	RANG_HUMAN	RANBP1	0.894933	0.946009	0.0116153	0.0558555
sp|P49757|NUMB_HUMAN	NUMB_HUMAN	NUMB	2.23136	1.49377	0.0111471	0.0452237
sp|Q14315|FLNC_HUMAN	FLNC_HUMAN	FLNC	0	0	0.011041	0.0485601
sp|Q5C9Z4|NOM1_HUMAN	NOM1_HUMAN	NOM1	3.71885	1.92843	0.0102793	-0.0322099
sp|Q9NSV4|DIAP3_HUMAN	DIAP3_HUMAN	DIAPH3	5.90004	2.429	0.00971958	0.0363184
sp|Q5VWQ0|RSBN1_HUMAN	RSBN1_HUMAN	RSBN1	0	0	0.00957566	-0.0237749
sp|Q8IY81|SPB1_HUMAN	SPB1_HUMAN	FTSJ3	4.03338	2.00833	0.00914827	0.0264817
sp|Q9BPX6|MICU1_HUMAN	MICU1_HUMAN	MICU1	3.12093	1.76661	0.00814725	0.0232299
sp|Q9Y2W6|TDRKH_HUMAN	TDRKH_HUMAN	TDRKH	3.87261	1.9679	0.00559321	0.0106543
sp|P51149|RAB7A_HUMAN	RAB7A_HUMAN	RAB7A	11.8314	3.43968	0.00553743	-0.0279762
sp|Q9NS69|TOM22_HUMAN	TOM22_HUMAN	TOMM22	1.61227	1.26975	0.00481297	0.0176612
sp|Q16891|MIC60_HUMAN	MIC60_HUMAN	IMMT	6.81693	2.61092	0.00390878	-0.0146455
sp|Q9BZ29|DOCK9_HUMAN	DOCK9_HUMAN	DOCK9	3.2576	1.80488	0.00308835	-0.0140053
sp|P11498|PYC_HUMAN	PYC_HUMAN	PC	16.9144	4.11271	0.00292674	-0.00672727
sp|P19367|HXK1_HUMAN	HXK1_HUMAN	HK1	8.16784	2.85794	0.00289145	0.0110595
sp|Q9C026|TRIM9_HUMAN	TRIM9_HUMAN	TRIM9	37.0215	6.08453	0.00267454	0.00495656
sp|Q8TCG1|CIP2A_HUMAN	CIP2A_HUMAN	CIP2A	3.55826	1.88633	0.00241363	0.0100741
sp|Q8IXI2|MIRO1_HUMAN	MIRO1_HUMAN	RHOT1	0	0	0.00216306	-0.00505881
sp|Q8NAN2|MIGA1_HUMAN	MIGA1_HUMAN	MIGA1	2.05212	1.43252	0.00108385	0.00602392
sp|P78527|PRKDC_HUMAN	PRKDC_HUMAN	PRKDC	5.99176	2.44781	0.000953602	-0.00358349
sp|P30519|HMOX2_HUMAN	HMOX2_HUMAN	HMOX2	1.10844	1.05282	0.000456476	-0.00170944
sp|Q9BYG3|MK67I_HUMAN	MK67I_HUMAN	NIFK	0	0	0.000313481	-0.000571531

## Sheet: RhoA QL
Majority protein IDs	Uniprot	Gene NAME	WD score	Root WD score	Log Student's T-test p-value RhoA QL	Student's T-test Difference RhoA QL
sp|Q9UBB9|TFP11_HUMAN	TFP11_HUMAN	TFIP11	3717.84	60.9741	22.3694	8.19785
sp|O14578|CTRO_HUMAN	CTRO_HUMAN	CIT	4071.41	63.8076	18.2636	9.09873
sp|Q9BST9|RTKN_HUMAN	RTKN_HUMAN	RTKN	13420.7	115.848	18.054	8.36643
sp|O95219|SNX4_HUMAN	SNX4_HUMAN	SNX4	343.308	18.5286	16.1021	6.07241
sp|Q92888|ARHG1_HUMAN	ARHG1_HUMAN	ARHGEF1	6028.7	77.6447	14.0529	4.53569
sp|Q13017|RHG05_HUMAN	RHG05_HUMAN	ARHGAP5	2339.62	48.3696	13.7129	9.61086
sp|Q9NQW6|ANLN_HUMAN	ANLN_HUMAN	ANLN	2829.83	53.1962	12.7821	6.75871
sp|Q8TD16|BICD2_HUMAN	BICD2_HUMAN	BICD2	67.0039	8.18559	12.5225	4.83263
sp|Q16512|PKN1_HUMAN	PKN1_HUMAN	PKN1	12207.7	110.489	11.3341	5.39733
sp|Q9NZN5|ARHGC_HUMAN	ARHGC_HUMAN	ARHGEF12	715.433	26.7476	10.887	10.0254
sp|Q8IZC4|RTKN2_HUMAN	RTKN2_HUMAN	RTKN2	6512.82	80.702	10.5294	5.37493
sp|P57678|GEMI4_HUMAN	GEMI4_HUMAN	GEMIN4	4740.05	68.848	10.1723	4.56424
sp|O15357|SHIP2_HUMAN	SHIP2_HUMAN	INPPL1	136.381	11.6782	9.35617	5.88258
sp|Q5T5U3|RHG21_HUMAN	RHG21_HUMAN	ARHGAP21	193.83	13.9223	8.85031	6.47666
sp|O75116|ROCK2_HUMAN	ROCK2_HUMAN	ROCK2	67.7801	8.23286	8.62786	8.80544
sp|O15085|ARHGB_HUMAN	ARHGB_HUMAN	ARHGEF11	591.899	24.329	8.33984	7.88862
sp|P16383|GCFC2_HUMAN	GCFC2_HUMAN	GCFC2	475.815	21.8132	8.05281	3.40179
sp|P61586|RHOA_HUMAN;sp|P08134|RHOC_HUMAN	RHOA_HUMAN	RHOA	4407.24	66.3871	7.8695	13.5838
sp|Q6XZF7|DNMBP_HUMAN	DNMBP_HUMAN	DNMBP	198.145	14.0764	7.82894	4.83965
sp|Q12979|ABR_HUMAN	ABR_HUMAN	ABR	1311.67	36.217	7.79124	3.88925
sp|Q9NRY4|RHG35_HUMAN	RHG35_HUMAN	ARHGAP35	258.659	16.0829	7.60278	9.81042
sp|Q6ZSZ5|ARHGI_HUMAN	ARHGI_HUMAN	ARHGEF18	1967.14	44.3524	7.43635	7.24408
sp|A1A4S6|RHG10_HUMAN	RHG10_HUMAN	ARHGAP10	230.035	15.1669	7.23456	2.49422
sp|B2RTY4|MYO9A_HUMAN	MYO9A_HUMAN	MYO9A	126.588	11.2511	6.89612	8.06015
sp|Q13464|ROCK1_HUMAN	ROCK1_HUMAN	ROCK1	59.4327	7.70926	6.80253	7.30574
sp|Q52LW3|RHG29_HUMAN	RHG29_HUMAN	ARHGAP29	515.172	22.6974	6.80096	3.23342
sp|Q9P107|GMIP_HUMAN	GMIP_HUMAN	GMIP	815.227	28.5522	6.50134	3.23403
sp|Q6ZS17|FA65A_HUMAN	FA65A_HUMAN	RIPOR1	618.195	24.8635	6.42791	3.00269
sp|Q9UDY2|ZO2_HUMAN	ZO2_HUMAN	TJP2	86.8065	9.317	5.90958	3.89977
sp|P46940|IQGA1_HUMAN	IQGA1_HUMAN	IQGAP1	475.012	21.7948	5.72188	2.76761
sp|Q16513|PKN2_HUMAN	PKN2_HUMAN	PKN2	72.7226	8.52776	5.70094	7.51079
sp|P33991|MCM4_HUMAN	MCM4_HUMAN	MCM4	4347.37	65.9346	5.34788	3.17809
sp|O60610|DIAP1_HUMAN	DIAP1_HUMAN	DIAPH1	114.215	10.6872	5.18387	3.70971
sp|A7KAX9|RHG32_HUMAN	RHG32_HUMAN	ARHGAP32	365.619	19.1212	4.88533	6.2336
sp|Q8TEQ6|GEMI5_HUMAN	GEMI5_HUMAN	GEMIN5	67.2719	8.20194	4.83456	8.19738
sp|Q92974|ARHG2_HUMAN	ARHG2_HUMAN	ARHGEF2	379.157	19.4719	4.75787	7.38205
sp|Q16637|SMN_HUMAN	SMN_HUMAN	SMN1	159.969	12.6479	4.47797	2.59729
sp|Q9UHI8|ATS1_HUMAN	ATS1_HUMAN	ADAMTS1	80.9332	8.99629	4.37384	2.99556
sp|Q9NX63|MIC19_HUMAN	MIC19_HUMAN	CHCHD3	15.4627	3.93227	4.0401	2.12706
sp|O60879|DIAP2_HUMAN	DIAP2_HUMAN	DIAPH2	36.1751	6.01458	4.0306	3.85533
sp|Q12802|AKP13_HUMAN	AKP13_HUMAN	AKAP13	300.525	17.3356	3.845	6.39795
sp|Q8N511|TM199_HUMAN	TM199_HUMAN	TMEM199	30.4745	5.52037	3.60808	3.21771
sp|O43399|TPD54_HUMAN	TPD54_HUMAN	TPD52L2	3.38465	1.83974	3.5082	2.9523
sp|Q6P5Z2|PKN3_HUMAN	PKN3_HUMAN	PKN3	735.514	27.1204	3.4327	2.15332
sp|Q6DN90|IQEC1_HUMAN	IQEC1_HUMAN	IQSEC1	41.6971	6.45733	3.43079	3.09766
sp|Q15005|SPCS2_HUMAN	SPCS2_HUMAN	SPCS2	39.1653	6.25822	3.3114	3.18359
sp|P57737|CORO7_HUMAN	CORO7_HUMAN	CORO7	0	0	3.18984	2.10476
sp|P22061|PIMT_HUMAN	PIMT_HUMAN	PCMT1	0	0	3.10663	3.6359
sp|P11274|BCR_HUMAN	BCR_HUMAN	BCR	41.6849	6.45638	3.05139	5.83594
sp|O14617|AP3D1_HUMAN	AP3D1_HUMAN	AP3D1	4.29971	2.07357	2.9608	-2.47628
sp|P16435|NCPR_HUMAN	NCPR_HUMAN	POR	51.206	7.15583	2.8582	4.23574
sp|Q96T51|RUFY1_HUMAN	RUFY1_HUMAN	RUFY1	12.0201	3.46701	2.8395	1.98772
sp|P47756|CAPZB_HUMAN	CAPZB_HUMAN	CAPZB	0	0	2.77266	2.14154
sp|P23246|SFPQ_HUMAN	SFPQ_HUMAN	SFPQ	0	0	2.59915	2.29479
sp|Q86VI3|IQGA3_HUMAN	IQGA3_HUMAN	IQGAP3	8.83503	2.97238	2.59898	1.6039
sp|P63027|VAMP2_HUMAN	VAMP2_HUMAN	VAMP2	0	0	2.59422	1.87333
sp|O60763|USO1_HUMAN	USO1_HUMAN	USO1	70.5637	8.40022	2.56087	2.56014
sp|Q7Z3T8|ZFY16_HUMAN	ZFY16_HUMAN	ZFYVE16	62.1374	7.88273	2.54644	2.92391
sp|O96013|PAK4_HUMAN	PAK4_HUMAN	PAK4	0	0	2.54074	2.03169
sp|Q07960|RHG01_HUMAN	RHG01_HUMAN	ARHGAP1	19.1274	4.37349	2.52928	6.34844
sp|P04843|RPN1_HUMAN	RPN1_HUMAN	RPN1	45.3598	6.73497	2.51525	3.77974
sp|Q99567|NUP88_HUMAN	NUP88_HUMAN	NUP88	4.57931	2.13993	2.43283	2.05203
sp|Q9Y3L5|RAP2C_HUMAN	RAP2C_HUMAN	RAP2C	0	0	2.41519	3.39828
sp|O14828|SCAM3_HUMAN	SCAM3_HUMAN	SCAMP3	0	0	2.38141	2.7429
sp|Q9NSV4|DIAP3_HUMAN	DIAP3_HUMAN	DIAPH3	20.62	4.54093	2.34771	4.23186
sp|Q13442|HAP28_HUMAN	HAP28_HUMAN	PDAP1	4.81633	2.19461	2.32322	2.35191
sp|Q9P227|RHG23_HUMAN	RHG23_HUMAN	ARHGAP23	0	0	2.30422	1.91309
sp|Q9NV70|EXOC1_HUMAN	EXOC1_HUMAN	EXOC1	71.2094	8.43856	2.23893	2.77312
sp|Q86UK7|ZN598_HUMAN	ZN598_HUMAN	ZNF598	9.20059	3.03325	2.19977	3.54479
sp|Q9Y4P3|TBL2_HUMAN	TBL2_HUMAN	TBL2	12.0182	3.46672	2.15726	3.32808
sp|P42224|STAT1_HUMAN	STAT1_HUMAN	STAT1	11.0126	3.31852	2.13629	2.52276
sp|Q9C026|TRIM9_HUMAN	TRIM9_HUMAN	TRIM9	3.43028	1.8521	2.1067	1.44458
sp|P30519|HMOX2_HUMAN	HMOX2_HUMAN	HMOX2	16.664	4.08215	2.04633	3.45501
sp|P07737|PROF1_HUMAN	PROF1_HUMAN	PFN1	6.30989	2.51195	2.0446	3.43303
sp|Q8N556|AFAP1_HUMAN	AFAP1_HUMAN	#N/A	#N/A	#N/A	2.04091	1.37162
sp|Q15637|SF01_HUMAN	SF01_HUMAN	SF1	0	0	2.00747	1.98433
sp|Q8TCJ2|STT3B_HUMAN	STT3B_HUMAN	STT3B	53.1885	7.29304	2.00143	2.71358
sp|Q5VV42|CDKAL_HUMAN	CDKAL_HUMAN	CDKAL1	17.9396	4.23551	1.99788	3.23275
sp|Q9Y394|DHRS7_HUMAN	DHRS7_HUMAN	DHRS7	26.6498	5.16234	1.96954	3.37818
sp|Q8N4V1|MMGT1_HUMAN	MMGT1_HUMAN	MMGT1	2.36762	1.53871	1.95786	2.14618
sp|Q15398|DLGP5_HUMAN	DLGP5_HUMAN	DLGAP5	37.3198	6.109	1.94678	2.35723
sp|Q9Y5K6|CD2AP_HUMAN	CD2AP_HUMAN	CD2AP	4.74786	2.17896	1.94448	3.86367
sp|Q99961|SH3G1_HUMAN	SH3G1_HUMAN	SH3GL1	22.2567	4.7177	1.90368	2.60669
sp|Q9UHI6|DDX20_HUMAN	DDX20_HUMAN	DDX20	19.8352	4.45367	1.89592	1.94297
sp|Q08378|GOGA3_HUMAN	GOGA3_HUMAN	GOLGA3	49.6741	7.04799	1.87855	2.8501
sp|Q9H6Z4|RANB3_HUMAN	RANB3_HUMAN	RANBP3	14.022	3.7446	1.87355	2.95636
sp|O14683|P5I11_HUMAN	P5I11_HUMAN	TP53I11	31.9448	5.65197	1.87167	2.91489
sp|O75369|FLNB_HUMAN	FLNB_HUMAN	FLNB	23.0285	4.7988	1.87077	3.45385
sp|Q8N5G2|MACOI_HUMAN	MACOI_HUMAN	MACO1	19.2354	4.38582	1.86648	3.00436
sp|Q9UHB9|SRP68_HUMAN	SRP68_HUMAN	SRP68	15.9666	3.99582	1.85395	3.91395
sp|O15173|PGRC2_HUMAN	PGRC2_HUMAN	PGRMC2	4.0121	2.00302	1.84279	1.54676
sp|Q96CN9|GCC1_HUMAN	GCC1_HUMAN	GCC1	2.4381	1.56144	1.81154	1.31778
sp|Q86XL3|ANKL2_HUMAN	ANKL2_HUMAN	ANKLE2	19.0624	4.36606	1.80492	3.23345
sp|Q16891|MIC60_HUMAN	MIC60_HUMAN	IMMT	35.7518	5.97928	1.80423	3.28827
sp|O95757|HS74L_HUMAN	HS74L_HUMAN	HSPA4L	24.2056	4.91992	1.74316	2.73948
sp|Q7Z628|ARHG8_HUMAN	ARHG8_HUMAN	NET1	15.4627	3.93227	1.69427	1.23905
sp|Q3V6T2|GRDN_HUMAN	GRDN_HUMAN	CCDC88A	8.26721	2.87528	1.64131	3.52117
sp|Q7Z4Q2|HEAT3_HUMAN	HEAT3_HUMAN	HEATR3	3.03627	1.74249	1.61891	1.40619
sp|Q15054|DPOD3_HUMAN	DPOD3_HUMAN	POLD3	44.3373	6.65862	1.61358	1.93321
sp|Q15738|NSDHL_HUMAN	NSDHL_HUMAN	NSDHL	11.0223	3.31999	1.6103	3.03547
sp|Q9Y678|COPG1_HUMAN	COPG1_HUMAN	COPG1	37.3846	6.11429	1.60618	2.14653
sp|Q9UPQ9|TNR6B_HUMAN	TNR6B_HUMAN	TNRC6B	2.03648	1.42705	1.60371	1.91838
sp|Q86U38|NOP9_HUMAN	NOP9_HUMAN	NOP9	1.74112	1.31952	1.60155	1.39167
sp|Q99848|EBP2_HUMAN	EBP2_HUMAN	EBNA1BP2	0	0	1.5991	2.75421
sp|P62826|RAN_HUMAN	RAN_HUMAN	RAN	25.2213	5.02208	1.58632	2.46881
sp|Q13371|PHLP_HUMAN	PHLP_HUMAN	PDCL	5.75628	2.39922	1.56407	3.4431
sp|Q99755|PI51A_HUMAN	PI51A_HUMAN	PIP5K1A	15.3836	3.92219	1.55418	2.93675
sp|Q96LT7|CI072_HUMAN	CI072_HUMAN	C9orf72	2.90448	1.70425	1.53725	1.68369
sp|Q9UNQ2|DIM1_HUMAN	DIM1_HUMAN	DIMT1	3.06351	1.75029	1.5361	1.43474
sp|O14737|PDCD5_HUMAN	PDCD5_HUMAN	PDCD5	1.95055	1.39662	1.53378	1.51399
sp|Q8IZ21|PHAR4_HUMAN	PHAR4_HUMAN	PHACTR4	8.27107	2.87595	1.52348	2.23327
sp|P46060|RAGP1_HUMAN	RAGP1_HUMAN	RANGAP1	19.687	4.437	1.50966	4.35706
sp|Q8TCT9|HM13_HUMAN	HM13_HUMAN	HM13	63.8969	7.99355	1.50527	2.95055
sp|Q14315|FLNC_HUMAN	FLNC_HUMAN	FLNC	0	0	1.49422	3.36895
sp|Q9BPX6|MICU1_HUMAN	MICU1_HUMAN	MICU1	5.08241	2.25442	1.49071	2.18631
sp|Q12965|MYO1E_HUMAN	MYO1E_HUMAN	MYO1E	13.8771	3.7252	1.4866	1.7195
sp|Q9HBM0|VEZA_HUMAN	VEZA_HUMAN	VEZT	35.5626	5.96344	1.48574	2.6478
sp|O15397|IPO8_HUMAN	IPO8_HUMAN	#N/A	#N/A	#N/A	1.48305	1.0015
sp|P33992|MCM5_HUMAN	MCM5_HUMAN	MCM5	4.62497	2.15057	1.46533	1.28578
sp|Q9Y679|AUP1_HUMAN	AUP1_HUMAN	AUP1	5.7159	2.39079	1.4648	2.55939
sp|P49006|MRP_HUMAN	MRP_HUMAN	MARCKSL1	0	0	1.45695	1.71405
sp|Q8IWJ2|GCC2_HUMAN	GCC2_HUMAN	GCC2	15.3982	3.92405	1.45385	4.42105
sp|Q9H3N1|TMX1_HUMAN	TMX1_HUMAN	TMX1	6.31963	2.51389	1.44413	3.46088
sp|Q9ULH0|KDIS_HUMAN	KDIS_HUMAN	KIDINS220	0	0	1.4421	1.16422
sp|Q9NP61|ARFG3_HUMAN	ARFG3_HUMAN	ARFGAP3	11.3728	3.37236	1.44102	2.05356
sp|P05141|ADT2_HUMAN	ADT2_HUMAN	#N/A	#N/A	#N/A	1.43449	1.15959
sp|Q9NTK5|OLA1_HUMAN	OLA1_HUMAN	OLA1	0	0	1.42946	-1.35365
sp|P84157|MXRA7_HUMAN	MXRA7_HUMAN	MXRA7	2.52246	1.58823	1.41387	1.97739
sp|Q9UJU6|DBNL_HUMAN	DBNL_HUMAN	DBNL	1.22791	1.10811	1.41294	1.45721
sp|Q96D09|GASP2_HUMAN	GASP2_HUMAN	GPRASP2	8.68507	2.94704	1.39384	2.1105
sp|Q9H3P7|GCP60_HUMAN	GCP60_HUMAN	ACBD3	5.04032	2.24507	1.3846	3.29499
sp|O60762|DPM1_HUMAN	DPM1_HUMAN	DPM1	1.73193	1.31603	1.37733	2.05516
sp|P08240|SRPRA_HUMAN	SRPRA_HUMAN	SRPRA	5.92	2.4331	1.37652	3.07967
sp|P49257|LMAN1_HUMAN	LMAN1_HUMAN	LMAN1	30.8063	5.55034	1.37527	3.72459
sp|Q9UNZ5|L10K_HUMAN	L10K_HUMAN	C19orf53	5.55095	2.35605	1.35974	1.93584
sp|Q96QD8|S38A2_HUMAN	S38A2_HUMAN	SLC38A2	21.0267	4.58549	1.35855	3.06685
sp|Q9H2G2|SLK_HUMAN	SLK_HUMAN	SLK	8.4803	2.9121	1.35487	3.61317
sp|Q96JQ2|CLMN_HUMAN	CLMN_HUMAN	CLMN	21.4583	4.63231	1.35242	1.72403
sp|Q96S66|CLCC1_HUMAN	CLCC1_HUMAN	CLCC1	4.8925	2.2119	1.33308	3.26269
sp|P02786|TFR1_HUMAN	TFR1_HUMAN	TFRC	12.6237	3.55298	1.32636	2.51875
sp|O43290|SNUT1_HUMAN	SNUT1_HUMAN	SART1	10.6061	3.25669	1.32063	2.7936
sp|Q7Z569|BRAP_HUMAN	BRAP_HUMAN	BRAP	18.8516	4.34184	1.29995	1.96235
sp|Q6FI81|CPIN1_HUMAN	CPIN1_HUMAN	CIAPIN1	6.36341	2.52258	1.25412	2.16087
sp|Q8IXI2|MIRO1_HUMAN	MIRO1_HUMAN	RHOT1	5.25794	2.29302	1.24954	1.62818
sp|Q9Y2R4|DDX52_HUMAN	DDX52_HUMAN	DDX52	10.7857	3.28416	1.24603	2.07057
sp|Q14137|BOP1_HUMAN	BOP1_HUMAN	BOP1	5.61485	2.36957	1.24149	2.33189
sp|Q9H7N4|SFR19_HUMAN	SFR19_HUMAN	SCAF1	11.0028	3.31705	1.23948	2.38201
sp|Q8IWX8|CHERP_HUMAN	CHERP_HUMAN	CHERP	16.5723	4.0709	1.22538	2.13856
sp|Q9Y4G6|TLN2_HUMAN	TLN2_HUMAN	TLN2	0	0	1.22449	0.877616
sp|P11498|PYC_HUMAN	PYC_HUMAN	PC	13.4388	3.6659	1.21991	-1.56983
sp|O00400|ACATN_HUMAN	ACATN_HUMAN	#N/A	#N/A	#N/A	1.21742	2.48711
sp|O14980|XPO1_HUMAN	XPO1_HUMAN	XPO1	5.24367	2.28991	1.21344	1.99398
sp|Q9UNX4|WDR3_HUMAN	WDR3_HUMAN	WDR3	9.97681	3.15861	1.20552	1.94342
sp|Q13596|SNX1_HUMAN	SNX1_HUMAN	SNX1	5.39313	2.32231	1.2014	2.67735
sp|Q96HC4|PDLI5_HUMAN	PDLI5_HUMAN	PDLIM5	4.77641	2.1855	1.19802	2.38962
sp|Q96EA4|SPDLY_HUMAN	SPDLY_HUMAN	SPDL1	2.19442	1.48136	1.19754	1.62389
sp|Q9UGP8|SEC63_HUMAN	SEC63_HUMAN	SEC63	8.54781	2.92366	1.19453	2.57346
sp|Q8TER5|ARH40_HUMAN	ARH40_HUMAN	#N/A	#N/A	#N/A	1.19406	-1.48811
sp|P23588|IF4B_HUMAN	IF4B_HUMAN	EIF4B	3.56175	1.88726	1.18806	2.30934
sp|Q8TD19|NEK9_HUMAN	NEK9_HUMAN	NEK9	30.1465	5.49059	1.18377	2.26663
sp|O00571|DDX3X_HUMAN;sp|O15523|DDX3Y_HUMAN	DDX3X_HUMAN	DDX3X	4.1182	2.02934	1.18356	2.88774
sp|P13797|PLST_HUMAN	PLST_HUMAN	PLS3	4.9171	2.21745	1.18154	2.08838
sp|P42704|LPPRC_HUMAN	LPPRC_HUMAN	LRPPRC	0	0	1.17972	-3.34327
sp|Q9BVC6|TM109_HUMAN	TM109_HUMAN	TMEM109	0	0	1.17832	1.69749
sp|Q5T8D3|ACBD5_HUMAN	ACBD5_HUMAN	#N/A	#N/A	#N/A	1.1779	2.39045
sp|P52655|TF2AA_HUMAN	TF2AA_HUMAN	#N/A	#N/A	#N/A	1.16929	1.71706
sp|Q9P2E9|RRBP1_HUMAN	RRBP1_HUMAN	RRBP1	14.4309	3.79881	1.16277	4.09318
sp|Q13428|TCOF_HUMAN	TCOF_HUMAN	TCOF1	11.0464	3.32362	1.16082	1.20996
sp|P61081|UBC12_HUMAN	UBC12_HUMAN	UBE2M	6.42826	2.5354	1.15939	2.10507
sp|O00567|NOP56_HUMAN	NOP56_HUMAN	NOP56	7.20371	2.68397	1.15861	2.86686
sp|Q9NRY5|F1142_HUMAN	F1142_HUMAN	FAM114A2	38.9132	6.23804	1.158	2.42542
sp|O00264|PGRC1_HUMAN	PGRC1_HUMAN	PGRMC1	34.9294	5.91011	1.15728	2.4202
sp|Q9UG63|ABCF2_HUMAN	ABCF2_HUMAN	#N/A	#N/A	#N/A	1.14543	2.74154
sp|Q14651|PLSI_HUMAN	PLSI_HUMAN	PLS1	0	0	1.1394	1.2565
sp|P56192|SYMC_HUMAN	SYMC_HUMAN	MARS	11.2038	3.34721	1.13254	1.9269
sp|Q8N5K1|CISD2_HUMAN	CISD2_HUMAN	CISD2	4.38243	2.09342	1.12896	2.48189
sp|Q05682|CALD1_HUMAN	CALD1_HUMAN	CALD1	4.53216	2.12889	1.12644	2.51956
sp|Q3ZCQ8|TIM50_HUMAN	TIM50_HUMAN	TIMM50	7.08694	2.66213	1.1195	2.04962
sp|Q9H1K0|RBNS5_HUMAN	RBNS5_HUMAN	RBSN	2.03686	1.42718	1.11111	1.28189
sp|P49368|TCPG_HUMAN	TCPG_HUMAN	CCT3	23.6274	4.86081	1.10622	1.85365
sp|Q9P0K7|RAI14_HUMAN	RAI14_HUMAN	RAI14	5.94153	2.43753	1.10495	2.95806
sp|Q9H4L5|OSBL3_HUMAN	OSBL3_HUMAN	OSBPL3	9.08484	3.01411	1.10314	2.59753
sp|Q14498|RBM39_HUMAN	RBM39_HUMAN	RBM39	0	0	1.10287	1.4601
sp|P06748|NPM_HUMAN	NPM_HUMAN	NPM1	15.0323	3.87715	1.10231	2.39023
sp|Q99439|CNN2_HUMAN	CNN2_HUMAN	CNN2	0	0	1.09641	2.00074
sp|P43307|SSRA_HUMAN	SSRA_HUMAN	SSR1	3.15759	1.77696	1.09426	2.75666
sp|P18564|ITB6_HUMAN	ITB6_HUMAN	ITGB6	0	0	1.09425	2.21349
sp|Q13190|STX5_HUMAN	STX5_HUMAN	STX5	4.83451	2.19875	1.08699	2.5904
sp|Q9BXS9|S26A6_HUMAN	S26A6_HUMAN	SLC26A6	8.87158	2.97852	1.0838	1.71105
sp|Q9P031|TAP26_HUMAN	TAP26_HUMAN	CCDC59	13.4089	3.66182	1.08248	2.89063
sp|P17844|DDX5_HUMAN	DDX5_HUMAN	DDX5	4.10077	2.02504	1.07927	1.09572
sp|O00471|EXOC5_HUMAN	EXOC5_HUMAN	EXOC5	3.20705	1.79082	1.07794	1.11018
sp|Q9Y5A9|YTHD2_HUMAN	YTHD2_HUMAN	YTHDF2	1.40643	1.18593	1.07598	1.74095
sp|Q9Y385|UB2J1_HUMAN	UB2J1_HUMAN	UBE2J1	9.16021	3.02658	1.07185	2.08723
sp|Q9NS69|TOM22_HUMAN	TOM22_HUMAN	TOMM22	5.51422	2.34824	1.07174	2.06809
sp|Q96A33|CCD47_HUMAN	CCD47_HUMAN	CCDC47	5.12528	2.26391	1.06617	2.40257
sp|Q8NAN2|MIGA1_HUMAN	MIGA1_HUMAN	MIGA1	5.10404	2.25921	1.06385	3.3646
sp|Q8N0Z3|SPICE_HUMAN	SPICE_HUMAN	SPICE1	8.75279	2.95851	1.06087	2.77531
sp|P25205|MCM3_HUMAN	MCM3_HUMAN	MCM3	9.4444	3.07317	1.05997	1.8845
sp|Q86Y07|VRK2_HUMAN	VRK2_HUMAN	VRK2	3.03915	1.74332	1.05189	1.23063
sp|Q07065|CKAP4_HUMAN	CKAP4_HUMAN	CKAP4	6.57441	2.56406	1.0464	1.7096
sp|Q15056|IF4H_HUMAN	IF4H_HUMAN	EIF4H	2.76722	1.6635	1.0376	2.40377
sp|P47712|PA24A_HUMAN	PA24A_HUMAN	PLA2G4A	23.414	4.8388	1.03663	1.84075
sp|P55011|S12A2_HUMAN	S12A2_HUMAN	SLC12A2	2.93906	1.71437	1.03479	-1.38226
sp|O14640|DVL1_HUMAN;sp|P54792|DVLP1_HUMAN	DVL1_HUMAN	DVL1	5.08581	2.25517	1.03191	2.16748
sp|P35611|ADDA_HUMAN	ADDA_HUMAN	#N/A	#N/A	#N/A	1.02183	2.27889
sp|Q13459|MYO9B_HUMAN	MYO9B_HUMAN	MYO9B	8.05666	2.83843	1.01829	2.79146
sp|Q15058|KIF14_HUMAN	KIF14_HUMAN	KIF14	22.35	4.72758	1.01811	3.19644
sp|P42167|LAP2B_HUMAN	LAP2B_HUMAN	TMPO	5.22592	2.28603	1.0156	1.28549
sp|O43396|TXNL1_HUMAN	TXNL1_HUMAN	TXNL1	5.30075	2.30234	1.01466	2.35178
sp|P22626|ROA2_HUMAN	ROA2_HUMAN	HNRNPA2B1	0	0	1.01347	1.28952
sp|Q2M1Z3|RHG31_HUMAN	RHG31_HUMAN	ARHGAP31	0	0	1.01288	-0.799391
sp|Q9NQC3|RTN4_HUMAN	RTN4_HUMAN	RTN4	8.64732	2.94063	1.01283	2.78558
sp|P52429|DGKE_HUMAN	DGKE_HUMAN	DGKE	0	0	1.0119	1.33466
sp|Q8IV50|LYSM2_HUMAN	LYSM2_HUMAN	#N/A	#N/A	#N/A	1.00821	1.44995
sp|Q5JTV8|TOIP1_HUMAN	TOIP1_HUMAN	TOR1AIP1	4.67823	2.16292	1.00013	1.66181
sp|P52306|GDS1_HUMAN	GDS1_HUMAN	RAP1GDS1	47.3285	6.87957	0.999271	3.76265
sp|P49756|RBM25_HUMAN	RBM25_HUMAN	RBM25	8.44727	2.90642	0.992949	2.39129
sp|P27824|CALX_HUMAN	CALX_HUMAN	CANX	9.00881	3.00147	0.989219	2.44192
sp|Q7L804|RFIP2_HUMAN	RFIP2_HUMAN	RAB11FIP2	13.0104	3.60699	0.987946	2.05905
sp|P25398|RS12_HUMAN	RS12_HUMAN	RPS12	7.12037	2.6684	0.985196	1.72445
sp|O15027|SC16A_HUMAN	SC16A_HUMAN	SEC16A	5.52728	2.35102	0.981265	2.14146
sp|P60842|IF4A1_HUMAN	IF4A1_HUMAN	EIF4A1	20.8469	4.56585	0.977619	1.95328
sp|Q13613|MTMR1_HUMAN	MTMR1_HUMAN	MTMR1	15.9688	3.9961	0.974378	1.30093
sp|Q9NYV4|CDK12_HUMAN	CDK12_HUMAN	CDK12	0	0	0.973097	1.77292
sp|P17812|PYRG1_HUMAN	PYRG1_HUMAN	CTPS1	6.96349	2.63884	0.962629	2.47928
sp|O00161|SNP23_HUMAN	SNP23_HUMAN	SNAP23	0	0	0.952086	1.41902
sp|P22102|PUR2_HUMAN	PUR2_HUMAN	GART	18.794	4.3352	0.94967	1.68373
sp|O95573|ACSL3_HUMAN	ACSL3_HUMAN	#N/A	#N/A	#N/A	0.946031	2.35309
sp|Q9HDC5|JPH1_HUMAN	JPH1_HUMAN	JPH1	4.78159	2.18669	0.94471	1.60981
sp|P30825|CTR1_HUMAN	CTR1_HUMAN	SLC7A1	0	0	0.940269	1.19622
sp|Q9UJS0|CMC2_HUMAN	CMC2_HUMAN	SLC25A13	18.4135	4.29109	0.939249	1.7038
sp|Q9NT62|ATG3_HUMAN	ATG3_HUMAN	#N/A	#N/A	#N/A	0.938603	-1.01179
sp|Q9NVI7|ATD3A_HUMAN	ATD3A_HUMAN	#N/A	#N/A	#N/A	0.935713	1.92992
sp|P63244|RACK1_HUMAN	RACK1_HUMAN	RACK1	6.87093	2.62125	0.932488	2.0349
sp|Q8NC51|PAIRB_HUMAN	PAIRB_HUMAN	SERBP1	4.63904	2.15384	0.931156	2.34563
sp|Q9Y2U8|MAN1_HUMAN	MAN1_HUMAN	LEMD3	7.37573	2.71583	0.928966	2.15726
sp|P50402|EMD_HUMAN	EMD_HUMAN	EMD	2.95772	1.7198	0.92744	1.71343
sp|P33176|KINH_HUMAN	KINH_HUMAN	KIF5B	11.9062	3.45054	0.927439	2.16822
sp|P57772|SELB_HUMAN	SELB_HUMAN	EEFSEC	13.7393	3.70665	0.922315	2.27248
sp|Q9NZM3|ITSN2_HUMAN	ITSN2_HUMAN	ITSN2	0	0	0.91985	1.51126
sp|P12236|ADT3_HUMAN	ADT3_HUMAN	#N/A	#N/A	#N/A	0.91446	1.70307
sp|Q15643|TRIPB_HUMAN	TRIPB_HUMAN	TRIP11	9.82394	3.13432	0.910365	2.9242
sp|Q13586|STIM1_HUMAN	STIM1_HUMAN	STIM1	7.18024	2.6796	0.910036	2.35116
sp|P30876|RPB2_HUMAN	RPB2_HUMAN	POLR2B	0.794561	0.891382	0.909434	-2.21039
sp|P48444|COPD_HUMAN	COPD_HUMAN	ARCN1	0	0	0.902913	1.8742
sp|Q12983|BNIP3_HUMAN	BNIP3_HUMAN	#N/A	#N/A	#N/A	0.900722	1.75596
sp|P33981|TTK_HUMAN	TTK_HUMAN	TTK	4.33503	2.08207	0.895559	2.323
sp|P49757|NUMB_HUMAN	NUMB_HUMAN	NUMB	4.15271	2.03782	0.894871	2.14216
sp|P19338|NUCL_HUMAN	NUCL_HUMAN	NCL	4.75048	2.17956	0.893262	2.16377
sp|Q86UE4|LYRIC_HUMAN	LYRIC_HUMAN	MTDH	4.11996	2.02977	0.888495	1.92601
sp|Q66PJ3|AR6P4_HUMAN	AR6P4_HUMAN	#N/A	#N/A	#N/A	0.886851	2.1804
sp|P61619|S61A1_HUMAN	S61A1_HUMAN	SEC61A1	2.52241	1.58821	0.886086	1.97846
sp|O95292|VAPB_HUMAN	VAPB_HUMAN	VAPB	3.70392	1.92456	0.881375	1.90756
sp|Q9UPW5|CBPC1_HUMAN	CBPC1_HUMAN	AGTPBP1	3.52161	1.8766	0.880821	-2.01972
sp|Q12830|BPTF_HUMAN	BPTF_HUMAN	#N/A	#N/A	#N/A	0.879996	1.85334
sp|P62304|RUXE_HUMAN	RUXE_HUMAN	SNRPE	0	0	0.875502	1.41916
sp|O75396|SC22B_HUMAN	SC22B_HUMAN	SEC22B	0	0	0.874097	1.32674
sp|P16949|STMN1_HUMAN	STMN1_HUMAN	STMN1	3.67998	1.91833	0.870105	1.8848
sp|P29966|MARCS_HUMAN	MARCS_HUMAN	MARCKS	3.77328	1.94249	0.869977	1.93951
sp|Q9BVP2|GNL3_HUMAN	GNL3_HUMAN	GNL3	8.9074	2.98453	0.86637	0.704039
sp|P62854|RS26_HUMAN;sp|Q5JNZ5|RS26L_HUMAN	RS26_HUMAN	RPS26	2.54991	1.59684	0.864736	0.834545
sp|Q96F07|CYFP2_HUMAN	CYFP2_HUMAN	CYFIP2	0	0	0.864048	0.787274
sp|P10412|H14_HUMAN	H14_HUMAN	HIST1H1E	16.4016	4.04989	0.863844	1.26285
sp|Q01650|LAT1_HUMAN	LAT1_HUMAN	SLC7A5	5.07113	2.25192	0.860129	2.04111
sp|O43143|DHX15_HUMAN	DHX15_HUMAN	DHX15	5.17272	2.27436	0.855869	2.10271
sp|Q9Y520|PRC2C_HUMAN	PRC2C_HUMAN	PRRC2C	8.97589	2.99598	0.854072	2.90601
sp|Q14331|FRG1_HUMAN	FRG1_HUMAN	FRG1	17.0402	4.12798	0.853016	1.81144
sp|O43169|CYB5B_HUMAN	CYB5B_HUMAN	CYB5B	0	0	0.852686	-2.37126
sp|P51617|IRAK1_HUMAN	IRAK1_HUMAN	IRAK1	4.5943	2.14343	0.851846	1.85016
sp|Q9HAU0|PKHA5_HUMAN	PKHA5_HUMAN	PLEKHA5	1.74496	1.32097	0.845137	1.59963
sp|P51530|DNA2_HUMAN	DNA2_HUMAN	DNA2	0	0	0.84493	1.02801
sp|P78318|IGBP1_HUMAN	IGBP1_HUMAN	IGBP1	2.77967	1.66723	0.842867	1.06204
sp|Q02790|FKBP4_HUMAN	FKBP4_HUMAN	FKBP4	0	0	0.842637	-1.73173
sp|P16333|NCK1_HUMAN	NCK1_HUMAN	NCK1	1.15429	1.07438	0.84171	1.57585
sp|Q8WXH0|SYNE2_HUMAN	SYNE2_HUMAN	SYNE2	10.7264	3.27513	0.841011	3.20591
sp|Q9BQ52|RNZ2_HUMAN	RNZ2_HUMAN	ELAC2	0	0	0.826188	1.48238
sp|P22234|PUR6_HUMAN	PUR6_HUMAN	PAICS	2.3486	1.53251	0.825091	1.13468
sp|P05556|ITB1_HUMAN	ITB1_HUMAN	ITGB1	4.56897	2.13752	0.823745	2.39296
sp|Q9NNW5|WDR6_HUMAN	WDR6_HUMAN	WDR6	18.2074	4.26701	0.82122	1.75198
sp|Q8NBN3|TM87A_HUMAN	TM87A_HUMAN	TMEM87A	10.1796	3.19055	0.820614	2.32882
sp|Q8N6T3|ARFG1_HUMAN	ARFG1_HUMAN	#N/A	#N/A	#N/A	0.819567	1.96713
sp|O14964|HGS_HUMAN	HGS_HUMAN	HGS	9.79561	3.12979	0.819152	1.39687
sp|P78347|GTF2I_HUMAN	GTF2I_HUMAN	GTF2I	0	0	0.817908	-1.70776
sp|Q5C9Z4|NOM1_HUMAN	NOM1_HUMAN	NOM1	5.42062	2.32822	0.81766	1.60121
sp|Q9NZ01|TECR_HUMAN	TECR_HUMAN	TECR	10.2417	3.20026	0.80367	2.22156
sp|Q9C0C9|UBE2O_HUMAN	UBE2O_HUMAN	UBE2O	0	0	0.800765	-1.57848
sp|Q9NQG6|MID51_HUMAN	MID51_HUMAN	MIEF1	2.75946	1.66116	0.800274	1.79518
sp|O00151|PDLI1_HUMAN	PDLI1_HUMAN	PDLIM1	4.46463	2.11297	0.799435	1.73122
sp|O94991|SLIK5_HUMAN	SLIK5_HUMAN	SLITRK5	0.763269	0.873653	0.798206	-2.14312
sp|P47914|RL29_HUMAN	RL29_HUMAN	RPL29	2.38345	1.54384	0.798012	0.988574
sp|Q9Y6K0|CEPT1_HUMAN	CEPT1_HUMAN	CEPT1	0	0	0.797239	1.44748
sp|Q96MW1|CCD43_HUMAN	CCD43_HUMAN	CCDC43	4.66598	2.16009	0.796638	1.94441
sp|Q92667|AKAP1_HUMAN	AKAP1_HUMAN	#N/A	#N/A	#N/A	0.796397	-0.969198
sp|Q06830|PRDX1_HUMAN	PRDX1_HUMAN	PRDX1	3.06519	1.75077	0.795799	0.89918
sp|P32119|PRDX2_HUMAN	PRDX2_HUMAN	PRDX2	0	0	0.794314	0.932042
sp|P22681|CBL_HUMAN	CBL_HUMAN	CBL	4.96514	2.22826	0.7922	1.48009
sp|Q14247|SRC8_HUMAN	SRC8_HUMAN	CTTN	5.07694	2.25321	0.78635	1.71828
sp|Q00325|MPCP_HUMAN	MPCP_HUMAN	SLC25A3	5.58527	2.36332	0.785094	1.21412
sp|Q92692|NECT2_HUMAN	NECT2_HUMAN	NECTIN2	0	0	0.782534	1.0835
sp|Q5HYI8|RABL3_HUMAN	RABL3_HUMAN	RABL3	3.38723	1.84044	0.781962	1.87512
sp|Q8N5I9|CL045_HUMAN	CL045_HUMAN	C12orf45	0	0	0.781851	0.800451
sp|Q6WKZ4|RFIP1_HUMAN	RFIP1_HUMAN	RAB11FIP1	6.26118	2.50224	0.77692	1.93759
sp|O00541|PESC_HUMAN	PESC_HUMAN	PES1	3.66933	1.91555	0.770363	1.65523
sp|P11387|TOP1_HUMAN	TOP1_HUMAN	TOP1	4.63358	2.15258	0.770159	1.82693
sp|Q96AG4|LRC59_HUMAN	LRC59_HUMAN	LRRC59	3.08237	1.75567	0.768627	1.29012
sp|Q86UL3|GPAT4_HUMAN	GPAT4_HUMAN	GPAT4	0	0	0.765962	1.75095
sp|P08195|4F2_HUMAN	4F2_HUMAN	#N/A	#N/A	#N/A	0.765915	0.966107
sp|Q92841|DDX17_HUMAN	DDX17_HUMAN	DDX17	4.73441	2.17587	0.764964	1.78369
sp|P17987|TCPA_HUMAN	TCPA_HUMAN	TCP1	5.48224	2.34142	0.763443	2.04992
sp|Q9Y2X3|NOP58_HUMAN	NOP58_HUMAN	NOP58	4.92978	2.22031	0.763238	1.74131
sp|Q8N9N7|LRC57_HUMAN	LRC57_HUMAN	LRRC57	8.59215	2.93124	0.762412	1.39452
sp|Q6MZP7|LIN54_HUMAN	LIN54_HUMAN	LIN54	0	0	0.761195	-1.27568
sp|O95470|SGPL1_HUMAN	SGPL1_HUMAN	SGPL1	7.76305	2.78623	0.761162	2.11257
sp|Q8IUD2|RB6I2_HUMAN	RB6I2_HUMAN	ERC1	7.26742	2.69582	0.759697	2.38381
sp|Q9BTX1|NDC1_HUMAN	NDC1_HUMAN	NDC1	11.9804	3.46127	0.756186	2.39585
sp|P32121|ARRB2_HUMAN	ARRB2_HUMAN	#N/A	#N/A	#N/A	0.755765	1.77149
sp|O14681|EI24_HUMAN	EI24_HUMAN	EI24	0	0	0.744092	0.968172
sp|Q9NTJ3|SMC4_HUMAN	SMC4_HUMAN	SMC4	0.922589	0.960515	0.743468	-2.44357
sp|Q14008|CKAP5_HUMAN	CKAP5_HUMAN	CKAP5	7.77641	2.78862	0.743097	2.57134
sp|Q9H8Y8|GORS2_HUMAN	GORS2_HUMAN	GORASP2	3.15143	1.77523	0.742686	1.93268
sp|P63261|ACTG_HUMAN;sp|P60709|ACTB_HUMAN	ACTG_HUMAN	#N/A	#N/A	#N/A	0.740468	1.24941
sp|Q9NVH0|EXD2_HUMAN	EXD2_HUMAN	EXD2	5.71184	2.38995	0.739502	0.831315
sp|Q15003|CND2_HUMAN	CND2_HUMAN	NCAPH	0	0	0.733595	0.958157
sp|Q9H089|LSG1_HUMAN	LSG1_HUMAN	LSG1	1.17272	1.08292	0.733245	1.12213
sp|Q13523|PRP4B_HUMAN	PRP4B_HUMAN	PRPF4B	1.26239	1.12356	0.733007	-1.7378
sp|P49790|NU153_HUMAN	NU153_HUMAN	NUP153	8.33733	2.88744	0.732846	2.63779
sp|P41440|S19A1_HUMAN	S19A1_HUMAN	SLC19A1	6.02551	2.45469	0.732129	1.82127
sp|P36542|ATPG_HUMAN	ATPG_HUMAN	#N/A	#N/A	#N/A	0.731963	1.86435
sp|P48029|SC6A8_HUMAN	SC6A8_HUMAN	SLC6A8	1.77891	1.33376	0.731681	1.41419
sp|Q13439|GOGA4_HUMAN	GOGA4_HUMAN	GOLGA4	11.4225	3.37972	0.730181	2.7724
sp|Q9UBM7|DHCR7_HUMAN	DHCR7_HUMAN	DHCR7	6.56252	2.56174	0.729799	1.78676
sp|Q15758|AAAT_HUMAN	AAAT_HUMAN	#N/A	#N/A	#N/A	0.727962	1.32096
sp|Q6PCB5|RSBNL_HUMAN	RSBNL_HUMAN	RSBN1L	5.94914	2.43909	0.725301	1.70877
sp|P62913|RL11_HUMAN	RL11_HUMAN	RPL11	3.07491	1.75354	0.724355	1.14188
sp|Q9H5V9|CX056_HUMAN	CX056_HUMAN	CXorf56	7.25829	2.69412	0.724302	1.73906
sp|P06733|ENOA_HUMAN	ENOA_HUMAN	ENO1	3.65283	1.91124	0.723493	1.75865
sp|P00338|LDHA_HUMAN	LDHA_HUMAN	LDHA	5.07063	2.25181	0.722618	1.73517
sp|P62829|RL23_HUMAN	RL23_HUMAN	RPL23	4.66667	2.16025	0.721005	0.677948
sp|P27635|RL10_HUMAN	RL10_HUMAN	RPL10	4.19213	2.04747	0.719658	0.614281
sp|Q71UM5|RS27L_HUMAN	RS27L_HUMAN	RPS27L	0	0	0.718849	2.33612
sp|Q7Z401|MYCPP_HUMAN	MYCPP_HUMAN	DENND4A	0	0	0.718623	0.901913
sp|P62701|RS4X_HUMAN	RS4X_HUMAN	RPS4X	3.84104	1.95986	0.718084	0.943526
sp|P54578|UBP14_HUMAN	UBP14_HUMAN	USP14	20.4724	4.52465	0.717588	1.1219
sp|P35579|MYH9_HUMAN	MYH9_HUMAN	MYH9	8.57992	2.92915	0.71689	1.94623
sp|P51970|NDUA8_HUMAN	NDUA8_HUMAN	NDUFA8	3.98403	1.996	0.715292	0.82428
sp|P46778|RL21_HUMAN	RL21_HUMAN	RPL21	7.11662	2.6677	0.714037	1.77845
sp|Q02040|AK17A_HUMAN	AK17A_HUMAN	#N/A	#N/A	#N/A	0.710335	2.23202
sp|P24752|THIL_HUMAN	THIL_HUMAN	ACAT1	0	0	0.707348	-1.71668
sp|Q8N2A8|PLD6_HUMAN	PLD6_HUMAN	PLD6	1.17553	1.08422	0.706162	1.32203
sp|Q15836|VAMP3_HUMAN	VAMP3_HUMAN	VAMP3	4.66939	2.16088	0.705882	1.58941
sp|P13639|EF2_HUMAN	EF2_HUMAN	EEF2	4.4485	2.10915	0.705241	1.06104
sp|Q68EM7|RHG17_HUMAN	RHG17_HUMAN	ARHGAP17	0	0	0.7052	0.622365
sp|O43933|PEX1_HUMAN	PEX1_HUMAN	PEX1	1.13159	1.06376	0.703658	-1.88097
sp|P07305|H10_HUMAN	H10_HUMAN	H1F0	8.95324	2.9922	0.702336	1.95806
sp|Q9UQN3|CHM2B_HUMAN	CHM2B_HUMAN	CHMP2B	4.14938	2.037	0.700594	1.72186
sp|P53618|COPB_HUMAN	COPB_HUMAN	COPB1	7.735	2.78119	0.700321	1.23136
sp|Q9GZR7|DDX24_HUMAN	DDX24_HUMAN	DDX24	6.07597	2.46495	0.698433	2.02487
sp|P51572|BAP31_HUMAN	BAP31_HUMAN	#N/A	#N/A	#N/A	0.696267	1.58635
sp|Q9H1E3|NUCKS_HUMAN	NUCKS_HUMAN	NUCKS1	111.322	10.5509	0.693394	1.1909
sp|Q14980|NUMA1_HUMAN	NUMA1_HUMAN	NUMA1	6.06763	2.46326	0.692277	2.20884
sp|Q13283|G3BP1_HUMAN	G3BP1_HUMAN	G3BP1	2.52246	1.58823	0.688467	1.06089
sp|Q14739|LBR_HUMAN	LBR_HUMAN	LBR	7.26993	2.69628	0.686243	1.44381
sp|P78344|IF4G2_HUMAN	IF4G2_HUMAN	EIF4G2	5.27176	2.29603	0.685132	2.00072
sp|P68363|TBA1B_HUMAN	TBA1B_HUMAN	TUBA1B	6.99753	2.64528	0.680657	0.505868
sp|Q7Z2W4|ZCCHV_HUMAN	ZCCHV_HUMAN	ZC3HAV1	8.18585	2.86109	0.680144	1.52983
sp|Q2NL82|TSR1_HUMAN	TSR1_HUMAN	TSR1	28.9205	5.37778	0.678161	0.889308
sp|Q8TBA6|GOGA5_HUMAN	GOGA5_HUMAN	GOLGA5	5.42628	2.32944	0.677854	2.08712
sp|P49792|RBP2_HUMAN	RBP2_HUMAN	RANBP2	8.97892	2.99649	0.67738	2.51246
sp|Q9BR76|COR1B_HUMAN	COR1B_HUMAN	CORO1B	3.8311	1.95732	0.676748	1.28023
sp|Q86YS6|RAB43_HUMAN	RAB43_HUMAN	RAB43	3.79372	1.94775	0.67323	1.68893
sp|P56182|RRP1_HUMAN	RRP1_HUMAN	RRP1	4.4002	2.09766	0.672991	1.5979
sp|O96011|PX11B_HUMAN	PX11B_HUMAN	PEX11B	3.56926	1.88925	0.670569	1.37175
sp|P62249|RS16_HUMAN	RS16_HUMAN	RPS16	3.78101	1.94448	0.66751	0.681805
sp|O94806|KPCD3_HUMAN	KPCD3_HUMAN	PRKD3	2.12597	1.45807	0.664547	0.752171
sp|P62820|RAB1A_HUMAN	RAB1A_HUMAN	RAB1A	4.30373	2.07454	0.664029	1.35984
sp|Q12797|ASPH_HUMAN	ASPH_HUMAN	#N/A	#N/A	#N/A	0.663744	0.928843
sp|O43175|SERA_HUMAN	SERA_HUMAN	PHGDH	7.4605	2.73139	0.661626	1.43972
sp|Q96BY7|ATG2B_HUMAN	ATG2B_HUMAN	#N/A	#N/A	#N/A	0.656353	2.18704
sp|Q9Y490|TLN1_HUMAN	TLN1_HUMAN	TLN1	9.82312	3.13419	0.655691	1.98157
sp|Q5VT66|MARC1_HUMAN	MARC1_HUMAN	MARC1	1.56439	1.25075	0.655564	1.36688
sp|Q6P1N0|C2D1A_HUMAN	C2D1A_HUMAN	#N/A	#N/A	#N/A	0.655421	-1.13178
sp|Q92575|UBXN4_HUMAN	UBXN4_HUMAN	UBXN4	3.82921	1.95684	0.650002	1.11034
sp|A6NKT7|RGPD3_HUMAN	RGPD3_HUMAN	#N/A	#N/A	#N/A	0.649745	1.39853
sp|Q9BU76|MMTA2_HUMAN	MMTA2_HUMAN	MMTAG2	3.45611	1.85906	0.646364	0.68383
sp|P23458|JAK1_HUMAN	JAK1_HUMAN	JAK1	10.7818	3.28357	0.644124	1.58215
sp|Q96A65|EXOC4_HUMAN	EXOC4_HUMAN	EXOC4	5.2571	2.29284	0.64362	1.61573
sp|P68133|ACTS_HUMAN;sp|P68032|ACTC_HUMAN;sp|P63267|ACTH_HUMAN;sp|P62736|ACTA_HUMAN	ACTS_HUMAN	#N/A	#N/A	#N/A	0.641626	1.33522
sp|P46821|MAP1B_HUMAN	MAP1B_HUMAN	MAP1B	7.29926	2.70171	0.64111	2.16769
sp|Q2TBE0|C19L2_HUMAN	C19L2_HUMAN	#N/A	#N/A	#N/A	0.640074	0.859646
sp|Q9BXF6|RFIP5_HUMAN	RFIP5_HUMAN	RAB11FIP5	6.12151	2.47417	0.637135	1.73637
sp|P11586|C1TC_HUMAN	C1TC_HUMAN	#N/A	#N/A	#N/A	0.636508	1.74185
sp|P12277|KCRB_HUMAN	KCRB_HUMAN	CKB	0	0	0.636452	0.945163
sp|P60866|RS20_HUMAN	RS20_HUMAN	RPS20	2.41492	1.554	0.636388	1.67884
sp|P11021|GRP78_HUMAN	GRP78_HUMAN	HSPA5	11.3915	3.37513	0.636319	1.77517
sp|Q8TDD1|DDX54_HUMAN	DDX54_HUMAN	DDX54	4.83225	2.19824	0.63626	2.29496
sp|Q9H2H9|S38A1_HUMAN	S38A1_HUMAN	SLC38A1	4.98782	2.23334	0.635989	2.11187
sp|P61978|HNRPK_HUMAN	HNRPK_HUMAN	HNRNPK	4.03783	2.00944	0.635517	1.54207
sp|P39019|RS19_HUMAN	RS19_HUMAN	RPS19	0	0	0.626134	1.11751
sp|O75400|PR40A_HUMAN	PR40A_HUMAN	PRPF40A	2.6135	1.61663	0.624123	-1.83501
sp|P53367|ARFP1_HUMAN	ARFP1_HUMAN	#N/A	#N/A	#N/A	0.624054	1.05666
sp|Q9BQA1|MEP50_HUMAN	MEP50_HUMAN	WDR77	10.3543	3.21781	0.623994	1.17122
sp|Q9P0L0|VAPA_HUMAN	VAPA_HUMAN	VAPA	3.99915	1.99979	0.621852	1.60227
sp|Q9NYJ8|TAB2_HUMAN	TAB2_HUMAN	TAB2	1.5457	1.24326	0.621495	1.12416
sp|Q96A49|SYAP1_HUMAN	SYAP1_HUMAN	SYAP1	3.62921	1.90505	0.614841	1.49182
sp|O94906|PRP6_HUMAN	PRP6_HUMAN	PRPF6	6.65932	2.58057	0.610432	1.94206
sp|P46781|RS9_HUMAN	RS9_HUMAN	RPS9	3.74442	1.93505	0.609126	1.44052
sp|P15880|RS2_HUMAN	RS2_HUMAN	RPS2	3.02192	1.73837	0.607632	1.03295
sp|P46109|CRKL_HUMAN	CRKL_HUMAN	CRKL	4.05708	2.01422	0.606743	1.09682
sp|P43487|RANG_HUMAN	RANG_HUMAN	RANBP1	3.39796	1.84335	0.605879	1.95215
sp|Q9UBC2|EP15R_HUMAN	EP15R_HUMAN	EPS15L1	5.04188	2.24541	0.603348	1.62593
sp|P27708|PYR1_HUMAN	PYR1_HUMAN	CAD	6.52228	2.55388	0.602603	1.52389
sp|Q7Z3U7|MON2_HUMAN	MON2_HUMAN	MON2	2.37713	1.5418	0.601901	0.681645
sp|Q969Z3|MARC2_HUMAN	MARC2_HUMAN	MARC2	4.16014	2.03964	0.596648	1.15605
sp|Q5VT25|MRCKA_HUMAN	MRCKA_HUMAN	CDC42BPA	3.30834	1.81888	0.59645	1.77525
sp|Q9ULJ7|ANR50_HUMAN	ANR50_HUMAN	#N/A	#N/A	#N/A	0.595992	0.784198
sp|Q96KG9|SCYL1_HUMAN	SCYL1_HUMAN	SCYL1	25.974	5.09647	0.593801	1.14423
sp|Q9P2W9|STX18_HUMAN	STX18_HUMAN	STX18	0	0	0.591228	0.6794
sp|P11717|MPRI_HUMAN	MPRI_HUMAN	IGF2R	6.08706	2.4672	0.589899	1.74969
sp|Q7Z4H7|HAUS6_HUMAN	HAUS6_HUMAN	HAUS6	5.86285	2.42133	0.588674	2.097
sp|Q9BRX8|F213A_HUMAN	F213A_HUMAN	FAM213A	0	0	0.587266	0.763453
sp|P61247|RS3A_HUMAN	RS3A_HUMAN	RPS3A	4.09407	2.02338	0.587061	1.65543
sp|O95831|AIFM1_HUMAN	AIFM1_HUMAN	#N/A	#N/A	#N/A	0.582552	1.22131
sp|O75691|UTP20_HUMAN	UTP20_HUMAN	UTP20	8.65005	2.9411	0.580151	1.60936
sp|Q99613|EIF3C_HUMAN;sp|B5ME19|EIFCL_HUMAN	EIF3C_HUMAN	EIF3C	3.38148	1.83888	0.577466	0.931346
sp|Q9ULH7|MKL2_HUMAN	MKL2_HUMAN	MRTFB	1.84195	1.35719	0.57502	-1.75562
sp|Q9UBF2|COPG2_HUMAN	COPG2_HUMAN	COPG2	4.92715	2.21972	0.5739	1.60219
sp|Q9Y450|HBS1L_HUMAN	HBS1L_HUMAN	HBS1L	5.47571	2.34002	0.573338	1.46653
sp|Q8WY36|BBX_HUMAN	BBX_HUMAN	#N/A	#N/A	#N/A	0.572274	1.76724
sp|P55010|IF5_HUMAN	IF5_HUMAN	EIF5	4.15921	2.03941	0.571352	1.51953
sp|Q14103|HNRPD_HUMAN	HNRPD_HUMAN	HNRNPD	0	0	0.568807	0.874814
sp|O94826|TOM70_HUMAN	TOM70_HUMAN	TOMM70	4.0259	2.00646	0.568546	1.13592
sp|P16401|H15_HUMAN	H15_HUMAN	HIST1H1B	2.59409	1.61062	0.568051	1.35527
sp|Q9HCU5|PREB_HUMAN	PREB_HUMAN	PREB	3.37912	1.83824	0.565786	1.56325
sp|O00213|APBB1_HUMAN	APBB1_HUMAN	#N/A	#N/A	#N/A	0.564612	1.53163
sp|Q99442|SEC62_HUMAN	SEC62_HUMAN	SEC62	19.2816	4.39108	0.563733	2.05786
sp|Q9BSD7|NTPCR_HUMAN	NTPCR_HUMAN	NTPCR	1.20259	1.09662	0.562816	1.00949
sp|P05412|JUN_HUMAN	JUN_HUMAN	JUN	0	0	0.56159	0.979637
sp|O15235|RT12_HUMAN	RT12_HUMAN	MRPS12	2.65545	1.62955	0.559739	1.57646
sp|O43592|XPOT_HUMAN	XPOT_HUMAN	XPOT	9.86616	3.14104	0.55864	1.10605
sp|Q92598|HS105_HUMAN	HS105_HUMAN	HSPH1	6.02474	2.45453	0.55604	2.01679
sp|Q9UH62|ARMX3_HUMAN	ARMX3_HUMAN	#N/A	#N/A	#N/A	0.55588	1.68404
sp|O95716|RAB3D_HUMAN	RAB3D_HUMAN	RAB3D	0	0	0.55513	0.769939
sp|P30041|PRDX6_HUMAN	PRDX6_HUMAN	PRDX6	0	0	0.553265	0.728394
sp|P04406|G3P_HUMAN	G3P_HUMAN	GAPDH	3.39404	1.84229	0.551316	1.40347
sp|Q5UIP0|RIF1_HUMAN	RIF1_HUMAN	RIF1	9.4253	3.07007	0.551277	0.859497
sp|Q9NVU7|SDA1_HUMAN	SDA1_HUMAN	SDAD1	5.672	2.3816	0.547834	2.11141
sp|Q14139|UBE4A_HUMAN	UBE4A_HUMAN	UBE4A	9.2399	3.03972	0.545976	1.31084
sp|Q8TAA9|VANG1_HUMAN	VANG1_HUMAN	VANGL1	1.46532	1.2105	0.545948	1.1867
sp|O75381|PEX14_HUMAN	PEX14_HUMAN	PEX14	4.35399	2.08662	0.544778	1.7462
sp|P18085|ARF4_HUMAN	ARF4_HUMAN	#N/A	#N/A	#N/A	0.544676	0.706269
sp|P27816|MAP4_HUMAN	MAP4_HUMAN	MAP4	5.07568	2.25293	0.542606	1.79681
sp|P23396|RS3_HUMAN	RS3_HUMAN	RPS3	4.01252	2.00313	0.537894	1.23891
sp|Q8TAT6|NPL4_HUMAN	NPL4_HUMAN	NPLOC4	1.11053	1.05382	0.537843	-1.4615
sp|O75663|TIPRL_HUMAN	TIPRL_HUMAN	TIPRL	2.64481	1.62629	0.53683	1.34263
sp|Q9NZI8|IF2B1_HUMAN	IF2B1_HUMAN	IGF2BP1	2.24003	1.49667	0.535043	1.03434
sp|Q9NP64|NO40_HUMAN	NO40_HUMAN	ZCCHC17	0	0	0.534479	1.36976
sp|Q9Y383|LC7L2_HUMAN	LC7L2_HUMAN	LUC7L2	5.9888	2.4472	0.531909	1.75327
sp|P82094|TMF1_HUMAN	TMF1_HUMAN	TMF1	4.72483	2.17367	0.530572	1.52323
sp|Q5JRA6|MIA3_HUMAN	MIA3_HUMAN	MIA3	7.78959	2.79098	0.52893	1.49582
sp|Q9NVN8|GNL3L_HUMAN	GNL3L_HUMAN	GNL3L	6.11896	2.47365	0.528442	1.44382
sp|Q9ULE6|PALD_HUMAN	PALD_HUMAN	PALD1	5.50668	2.34663	0.524359	1.66637
sp|O95210|STBD1_HUMAN	STBD1_HUMAN	STBD1	1.85064	1.36038	0.523718	1.17757
sp|P68371|TBB4B_HUMAN	TBB4B_HUMAN	TUBB4B	6.52502	2.55441	0.523634	0.75787
sp|Q96C19|EFHD2_HUMAN	EFHD2_HUMAN	EFHD2	3.22355	1.79542	0.522675	1.41443
sp|Q13085|ACACA_HUMAN	ACACA_HUMAN	#N/A	#N/A	#N/A	0.522579	-0.729654
sp|Q9HCM4|E41L5_HUMAN	E41L5_HUMAN	EPB41L5	3.9161	1.97891	0.519748	1.46552
sp|Q6NUQ4|TM214_HUMAN	TM214_HUMAN	TMEM214	0	0	0.518726	0.797577
sp|Q9Y6R0|NUMBL_HUMAN	NUMBL_HUMAN	NUMBL	5.11775	2.26225	0.518681	1.09808
sp|P55072|TERA_HUMAN	TERA_HUMAN	VCP	0	0	0.515781	0.972848
sp|Q9Y4E8|UBP15_HUMAN	UBP15_HUMAN	USP15	5.05421	2.24816	0.51438	1.89272
sp|P52701|MSH6_HUMAN	MSH6_HUMAN	MSH6	0.769906	0.877443	0.512812	-1.43644
sp|Q96N67|DOCK7_HUMAN	DOCK7_HUMAN	DOCK7	24.1765	4.91696	0.509665	-2.43368
sp|Q2NKX8|ERC6L_HUMAN	ERC6L_HUMAN	ERCC6L	9.36915	3.06091	0.508274	1.7045
sp|P50479|PDLI4_HUMAN	PDLI4_HUMAN	PDLIM4	2.23074	1.49357	0.507922	1.10406
sp|Q53GQ0|DHB12_HUMAN	DHB12_HUMAN	HSD17B12	4.18032	2.04458	0.506002	0.616488
sp|Q7Z6K5|ARPIN_HUMAN	ARPIN_HUMAN	#N/A	#N/A	#N/A	0.505725	1.50073
sp|O75534|CSDE1_HUMAN	CSDE1_HUMAN	CSDE1	4.8939	2.21222	0.502	1.72632
sp|Q07812|BAX_HUMAN	BAX_HUMAN	#N/A	#N/A	#N/A	0.501678	1.46618
sp|Q14126|DSG2_HUMAN	DSG2_HUMAN	DSG2	0	0	0.50125	-1.27491
sp|Q08379|GOGA2_HUMAN	GOGA2_HUMAN	GOLGA2	2.5252	1.58909	0.499527	1.27655
sp|Q9NVP1|DDX18_HUMAN	DDX18_HUMAN	DDX18	5.57794	2.36177	0.496278	1.74427
sp|Q5T9A4|ATD3B_HUMAN	ATD3B_HUMAN	#N/A	#N/A	#N/A	0.495952	0.842708
sp|Q9Y285|SYFA_HUMAN	SYFA_HUMAN	FARSA	0	0	0.495371	0.539556
sp|Q5VWQ8|DAB2P_HUMAN	DAB2P_HUMAN	DAB2IP	4.83416	2.19867	0.493075	0.529586
sp|P55036|PSMD4_HUMAN	PSMD4_HUMAN	PSMD4	0	0	0.492461	-1.7313
sp|Q9UIQ6|LCAP_HUMAN	LCAP_HUMAN	LNPEP	12.0507	3.47142	0.491307	1.07581
sp|Q7KZF4|SND1_HUMAN	SND1_HUMAN	SND1	4.55032	2.13315	0.490249	1.53655
sp|A0FGR8|ESYT2_HUMAN	ESYT2_HUMAN	ESYT2	4.47039	2.11433	0.488674	1.2517
sp|O95347|SMC2_HUMAN	SMC2_HUMAN	SMC2	3.25638	1.80454	0.487866	0.912011
sp|Q9H2J7|S6A15_HUMAN	S6A15_HUMAN	SLC6A15	6.38755	2.52736	0.484311	0.771357
sp|Q969Q0|RL36L_HUMAN	RL36L_HUMAN	RPL36AL	7.79222	2.79146	0.482076	1.38487
sp|Q8TCG1|CIP2A_HUMAN	CIP2A_HUMAN	#N/A	#N/A	#N/A	0.481611	1.40723
sp|Q6Y7W6|GGYF2_HUMAN	GGYF2_HUMAN	GIGYF2	6.14366	2.47864	0.481148	1.31846
sp|P18031|PTN1_HUMAN	PTN1_HUMAN	PTPN1	3.88127	1.97009	0.476847	0.571925
sp|Q8NG31|KNL1_HUMAN	KNL1_HUMAN	KNL1	8.58409	2.92986	0.476827	1.73866
sp|P62244|RS15A_HUMAN	RS15A_HUMAN	RPS15A	3.84943	1.962	0.474322	1.42213
sp|Q9UNZ2|NSF1C_HUMAN	NSF1C_HUMAN	NSFL1C	0	0	0.469229	0.876928
sp|P62851|RS25_HUMAN	RS25_HUMAN	RPS25	2.44636	1.56408	0.467924	0.910992
sp|P83881|RL36A_HUMAN	RL36A_HUMAN	RPL36A	5.9509	2.43945	0.467917	0.515772
sp|Q9UJV9|DDX41_HUMAN	DDX41_HUMAN	DDX41	2.56841	1.60263	0.467593	1.02754
sp|P81605|DCD_HUMAN	DCD_HUMAN	DCD	0.92953	0.964121	0.466504	-1.24725
sp|P50851|LRBA_HUMAN	LRBA_HUMAN	LRBA	8.26454	2.87481	0.465832	1.90019
sp|Q14789|GOGB1_HUMAN	GOGB1_HUMAN	GOLGB1	13.6246	3.69116	0.464575	1.72006
sp|Q53H12|AGK_HUMAN	AGK_HUMAN	#N/A	#N/A	#N/A	0.4634	1.30703
sp|Q9Y277|VDAC3_HUMAN	VDAC3_HUMAN	VDAC3	0	0	0.4629	1.00206
sp|P49959|MRE11_HUMAN	MRE11_HUMAN	MRE11	4.04367	2.01089	0.462223	0.930553
sp|O75915|PRAF3_HUMAN	PRAF3_HUMAN	ARL6IP5	10.0771	3.17445	0.461368	1.05198
sp|Q01968|OCRL_HUMAN	OCRL_HUMAN	OCRL	4.0903	2.02245	0.460863	1.31831
sp|Q8IWR0|Z3H7A_HUMAN	Z3H7A_HUMAN	ZC3H7A	1.86378	1.3652	0.458712	0.826966
sp|Q9UPN3|MACF1_HUMAN	MACF1_HUMAN	MACF1	10.3964	3.22435	0.456847	1.75639
sp|Q15417|CNN3_HUMAN	CNN3_HUMAN	#N/A	#N/A	#N/A	0.456226	1.30409
sp|P84077|ARF1_HUMAN;sp|P61204|ARF3_HUMAN	ARF1_HUMAN	#N/A	#N/A	#N/A	0.454696	0.738779
sp|Q9H6U6|BCAS3_HUMAN	BCAS3_HUMAN	#N/A	#N/A	#N/A	0.451768	-0.682904
sp|Q14974|IMB1_HUMAN	IMB1_HUMAN	KPNB1	0.956081	0.977794	0.451624	-1.2693
sp|Q9BQG0|MBB1A_HUMAN	MBB1A_HUMAN	MYBBP1A	7.96828	2.82281	0.451556	-0.596666
sp|P62280|RS11_HUMAN	RS11_HUMAN	RPS11	3.39202	1.84174	0.451496	1.29005
sp|Q9UJ14|GGT7_HUMAN	GGT7_HUMAN	GGT7	3.21524	1.79311	0.451061	0.782132
sp|P68431|H31_HUMAN;sp|Q71DI3|H32_HUMAN;sp|Q16695|H31T_HUMAN;sp|P84243|H33_HUMAN;sp|Q6NXT2|H3C_HUMAN	H31_HUMAN	HIST1H3A	0	0	0.450877	1.25643
sp|P62263|RS14_HUMAN	RS14_HUMAN	RPS14	3.22446	1.79568	0.450685	1.05428
sp|Q5VTE0|EF1A3_HUMAN;sp|P68104|EF1A1_HUMAN	EF1A3_HUMAN	EEF1A1P5	0	0	0.450519	0.442091
sp|Q02952|AKA12_HUMAN	AKA12_HUMAN	#N/A	#N/A	#N/A	0.449824	1.5621
sp|P07437|TBB5_HUMAN	TBB5_HUMAN	TUBB	6.46376	2.54239	0.449644	0.562464
sp|Q9NPL8|TIDC1_HUMAN	TIDC1_HUMAN	TIMMDC1	0	0	0.449507	0.730918
sp|O14531|DPYL4_HUMAN	DPYL4_HUMAN	DPYSL4	0	0	0.448063	0.811814
sp|Q15366|PCBP2_HUMAN	PCBP2_HUMAN	PCBP2	2.66926	1.63379	0.448024	0.810127
sp|P24928|RPB1_HUMAN	RPB1_HUMAN	POLR2A	4.71658	2.17177	0.447929	1.50246
sp|Q9Y266|NUDC_HUMAN	NUDC_HUMAN	NUDC	4.25219	2.06208	0.444609	0.775044
sp|Q4KMP7|TB10B_HUMAN	TB10B_HUMAN	TBC1D10B	3.28262	1.8118	0.444178	1.227
sp|P83731|RL24_HUMAN	RL24_HUMAN	RPL24	3.46228	1.86072	0.444074	0.482736
sp|Q9BZE4|NOG1_HUMAN	NOG1_HUMAN	GTPBP4	2.94587	1.71635	0.4428	1.53796
sp|Q96CS3|FAF2_HUMAN	FAF2_HUMAN	FAF2	2.48562	1.57658	0.440099	0.999163
sp|Q9Y3F4|STRAP_HUMAN	STRAP_HUMAN	STRAP	0	0	0.438819	0.847848
sp|Q99879|H2B1M_HUMAN;sp|Q99880|H2B1L_HUMAN;sp|Q99877|H2B1N_HUMAN;sp|Q93079|H2B1H_HUMAN;sp|Q5QNW6|H2B2F_HUMAN;sp|P62807|H2B1C_HUMAN;sp|P58876|H2B1D_HUMAN;sp|P57053|H2BFS_HUMAN;sp|O60814|H2B1K_HUMAN	H2B1M_HUMAN	#N/A	#N/A	#N/A	0.438751	-1.18436
sp|Q9UL54|TAOK2_HUMAN	TAOK2_HUMAN	TAOK2	4.56907	2.13754	0.43847	1.33088
sp|P25705|ATPA_HUMAN	ATPA_HUMAN	#N/A	#N/A	#N/A	0.435013	1.28484
sp|Q13823|NOG2_HUMAN	NOG2_HUMAN	GNL2	5.93898	2.437	0.434974	1.3278
sp|Q96EB1|ELP4_HUMAN	ELP4_HUMAN	ELP4	2.78169	1.66784	0.434854	0.712749
sp|P62937|PPIA_HUMAN	PPIA_HUMAN	PPIA	0.932798	0.965815	0.434726	1.00768
sp|Q9H6T3|RPAP3_HUMAN	RPAP3_HUMAN	RPAP3	0.972693	0.986252	0.43459	-1.33806
sp|P21333|FLNA_HUMAN	FLNA_HUMAN	FLNA	5.0637	2.25027	0.432895	1.16082
sp|Q658Y4|F91A1_HUMAN	F91A1_HUMAN	FAM91A1	5.72368	2.39242	0.431937	1.4091
sp|Q8NE71|ABCF1_HUMAN	ABCF1_HUMAN	#N/A	#N/A	#N/A	0.428939	0.837451
sp|P35268|RL22_HUMAN	RL22_HUMAN	RPL22	0	0	0.428829	1.20173
sp|Q6P2H3|CEP85_HUMAN	CEP85_HUMAN	#N/A	#N/A	#N/A	0.426903	0.623246
sp|Q96AY4|TTC28_HUMAN	TTC28_HUMAN	TTC28	5.32735	2.3081	0.426642	1.70877
sp|P09543|CN37_HUMAN	CN37_HUMAN	#N/A	#N/A	#N/A	0.42599	-0.819469
sp|P54886|P5CS_HUMAN	P5CS_HUMAN	ALDH18A1	0	0	0.425758	-0.50541
sp|P12270|TPR_HUMAN	TPR_HUMAN	TPR	11.4624	3.38562	0.424877	1.11714
sp|Q3YEC7|RABL6_HUMAN	RABL6_HUMAN	RABL6	1.99852	1.41369	0.421142	-1.30976
sp|Q562R1|ACTBL_HUMAN	ACTBL_HUMAN	#N/A	#N/A	#N/A	0.419141	1.26147
sp|Q9UPS8|ANR26_HUMAN	ANR26_HUMAN	#N/A	#N/A	#N/A	0.418987	-1.18162
sp|Q9NWT8|AKIP_HUMAN	AKIP_HUMAN	#N/A	#N/A	#N/A	0.417731	-1.39892
sp|P46939|UTRO_HUMAN	UTRO_HUMAN	UTRN	7.6877	2.77267	0.417269	1.91465
sp|Q93045|STMN2_HUMAN	STMN2_HUMAN	STMN2	0	0	0.416273	0.995001
sp|P31948|STIP1_HUMAN	STIP1_HUMAN	STIP1	6.22688	2.49537	0.414985	1.48057
sp|Q13492|PICAL_HUMAN	PICAL_HUMAN	PICALM	0	0	0.414793	0.82737
sp|Q9Y295|DRG1_HUMAN	DRG1_HUMAN	DRG1	0	0	0.413834	0.527148
sp|Q14677|EPN4_HUMAN	EPN4_HUMAN	CLINT1	3.24064	1.80018	0.413655	1.2885
sp|P46108|CRK_HUMAN	CRK_HUMAN	#N/A	#N/A	#N/A	0.413509	0.792493
sp|Q6UB99|ANR11_HUMAN	ANR11_HUMAN	#N/A	#N/A	#N/A	0.4102	-1.60465
sp|Q9Y6I9|TX264_HUMAN	TX264_HUMAN	TEX264	8.39807	2.89794	0.407618	1.05406
sp|P18583|SON_HUMAN	SON_HUMAN	SON	6.72823	2.59388	0.40722	0.711273
sp|P23381|SYWC_HUMAN	SYWC_HUMAN	WARS	0	0	0.406822	0.763602
sp|Q14204|DYHC1_HUMAN	DYHC1_HUMAN	DYNC1H1	3.08032	1.75509	0.406524	0.897228
sp|Q07820|MCL1_HUMAN	MCL1_HUMAN	MCL1	0.663102	0.81431	0.4056	-0.900985
sp|Q9BRS2|RIOK1_HUMAN	RIOK1_HUMAN	RIOK1	4.4866	2.11816	0.405326	0.754289
sp|Q96JB5|CK5P3_HUMAN	CK5P3_HUMAN	#N/A	#N/A	#N/A	0.402223	0.679256
sp|P62258|1433E_HUMAN	1433E_HUMAN	#N/A	#N/A	#N/A	0.399517	0.906772
sp|P53007|TXTP_HUMAN	TXTP_HUMAN	SLC25A1	9.81642	3.13312	0.399441	1.0803
sp|Q12923|PTN13_HUMAN	PTN13_HUMAN	PTPN13	7.94086	2.81795	0.398531	1.39411
sp|O95372|LYPA2_HUMAN	LYPA2_HUMAN	LYPLA2	2.57766	1.60551	0.396157	1.24448
sp|Q8NDI1|EHBP1_HUMAN	EHBP1_HUMAN	EHBP1	5.33459	2.30967	0.395095	0.817792
sp|P32780|TF2H1_HUMAN	TF2H1_HUMAN	GTF2H1	6.06305	2.46233	0.393794	0.773225
sp|Q9NXR1|NDE1_HUMAN	NDE1_HUMAN	NDE1	0	0	0.393665	1.27274
sp|O43426|SYNJ1_HUMAN	SYNJ1_HUMAN	SYNJ1	0	0	0.39281	-1.28643
sp|Q9GZY8|MFF_HUMAN	MFF_HUMAN	MFF	3.05714	1.74847	0.389959	1.23616
sp|Q9UQ35|SRRM2_HUMAN	SRRM2_HUMAN	SRRM2	6.43809	2.53734	0.388528	1.57512
sp|Q9ULS5|TMCC3_HUMAN	TMCC3_HUMAN	TMCC3	0	0	0.386603	0.576267
sp|P62277|RS13_HUMAN	RS13_HUMAN	RPS13	3.76685	1.94084	0.385928	1.11254
sp|Q96EX3|WDR34_HUMAN	WDR34_HUMAN	WDR34	2.13063	1.45967	0.385374	0.744754
sp|P22314|UBA1_HUMAN	UBA1_HUMAN	UBA1	1.55286	1.24614	0.383345	0.703706
sp|P62861|RS30_HUMAN	RS30_HUMAN	FAU	3.40362	1.84489	0.382962	0.55325
sp|Q13642|FHL1_HUMAN	FHL1_HUMAN	FHL1	5.86778	2.42235	0.378206	0.982278
sp|Q6PKG0|LARP1_HUMAN	LARP1_HUMAN	LARP1	2.66778	1.63334	0.376582	-1.47991
sp|O60716|CTND1_HUMAN	CTND1_HUMAN	#N/A	#N/A	#N/A	0.376486	1.19771
sp|Q9H501|ESF1_HUMAN	ESF1_HUMAN	ESF1	4.175	2.04328	0.374788	0.876672
sp|P16615|AT2A2_HUMAN	AT2A2_HUMAN	#N/A	#N/A	#N/A	0.37467	1.2646
sp|Q92522|H1X_HUMAN	H1X_HUMAN	H1FX	3.10543	1.76222	0.373928	1.20577
sp|O00429|DNM1L_HUMAN	DNM1L_HUMAN	DNM1L	6.36421	2.52274	0.373316	0.684404
sp|P49327|FAS_HUMAN	FAS_HUMAN	FASN	15.05	3.87943	0.37309	0.591468
sp|P04181|OAT_HUMAN	OAT_HUMAN	OAT	0	0	0.37235	-0.650143
sp|Q07020|RL18_HUMAN	RL18_HUMAN	RPL18	0	0	0.369871	-1.01207
sp|Q8NF37|PCAT1_HUMAN	PCAT1_HUMAN	LPCAT1	0	0	0.3696	-0.451516
sp|Q6P1K8|T2H2L_HUMAN;sp|Q13888|TF2H2_HUMAN	T2H2L_HUMAN	GTF2H2C	0	0	0.36915	0.523598
sp|P35658|NU214_HUMAN	NU214_HUMAN	NUP214	6.67942	2.58446	0.366419	1.01221
sp|P18621|RL17_HUMAN	RL17_HUMAN	RPL17	3.07558	1.75373	0.366224	0.327476
sp|Q5T3I0|GPTC4_HUMAN	GPTC4_HUMAN	GPATCH4	4.44008	2.10715	0.366054	0.914949
sp|Q13325|IFIT5_HUMAN	IFIT5_HUMAN	IFIT5	3.88753	1.97168	0.365658	0.804651
sp|Q96D71|REPS1_HUMAN	REPS1_HUMAN	REPS1	0	0	0.365276	0.473678
sp|Q5TC12|ATPF1_HUMAN	ATPF1_HUMAN	#N/A	#N/A	#N/A	0.364658	0.947438
sp|O75592|MYCB2_HUMAN	MYCB2_HUMAN	MYCBP2	7.76031	2.78573	0.364276	1.38646
sp|Q8WWM7|ATX2L_HUMAN	ATX2L_HUMAN	#N/A	#N/A	#N/A	0.364273	-1.10199
sp|P41250|GARS_HUMAN	GARS_HUMAN	GARS	0	0	0.363258	0.470958
sp|P35030|TRY3_HUMAN	TRY3_HUMAN	PRSS3	0	0	0.360957	-1.22718
sp|P08238|HS90B_HUMAN	HS90B_HUMAN	HSP90AB1	5.68899	2.38516	0.36052	-0.573806
sp|P12004|PCNA_HUMAN	PCNA_HUMAN	PCNA	2.32403	1.52448	0.35967	0.702483
sp|Q8N2F6|ARM10_HUMAN	ARM10_HUMAN	#N/A	#N/A	#N/A	0.358781	0.964423
sp|O75113|N4BP1_HUMAN	N4BP1_HUMAN	N4BP1	7.64542	2.76503	0.354111	1.23848
sp|P13804|ETFA_HUMAN	ETFA_HUMAN	ETFA	1.4176	1.19063	0.353967	-1.20139
sp|Q96JH7|VCIP1_HUMAN	VCIP1_HUMAN	VCPIP1	2.10646	1.45137	0.35388	-1.47065
sp|Q9NW15|ANO10_HUMAN	ANO10_HUMAN	#N/A	#N/A	#N/A	0.353535	-0.652568
sp|P14618|KPYM_HUMAN	KPYM_HUMAN	PKM	1.39278	1.18016	0.353297	-0.848338
sp|P35613|BASI_HUMAN	BASI_HUMAN	#N/A	#N/A	#N/A	0.350689	-1.05377
sp|O75683|SURF6_HUMAN	SURF6_HUMAN	SURF6	4.91235	2.21638	0.350427	1.32356
sp|Q5JTW2|CEP78_HUMAN	CEP78_HUMAN	#N/A	#N/A	#N/A	0.350101	1.12289
sp|P62753|RS6_HUMAN	RS6_HUMAN	RPS6	5.69564	2.38655	0.348906	0.375838
sp|P53794|SC5A3_HUMAN	SC5A3_HUMAN	SLC5A3	0	0	0.348883	0.515127
sp|P43003|EAA1_HUMAN	EAA1_HUMAN	SLC1A3	0	0	0.348713	-0.559322
sp|Q9Y265|RUVB1_HUMAN	RUVB1_HUMAN	RUVBL1	2.37339	1.54058	0.34771	-1.14526
sp|P40855|PEX19_HUMAN	PEX19_HUMAN	PEX19	1.39347	1.18045	0.346859	-1.00955
sp|Q9Y2W6|TDRKH_HUMAN	TDRKH_HUMAN	TDRKH	4.31476	2.0772	0.346738	0.488534
sp|P62910|RL32_HUMAN	RL32_HUMAN	RPL32	2.91005	1.70589	0.34333	0.857468
sp|Q8IWZ3|ANKH1_HUMAN	ANKH1_HUMAN	#N/A	#N/A	#N/A	0.343257	1.60353
sp|P05023|AT1A1_HUMAN	AT1A1_HUMAN	#N/A	#N/A	#N/A	0.342064	1.03173
sp|Q5THJ4|VP13D_HUMAN	VP13D_HUMAN	VPS13D	8.85894	2.9764	0.341696	1.60649
sp|Q9NUQ8|ABCF3_HUMAN	ABCF3_HUMAN	#N/A	#N/A	#N/A	0.341013	-0.469385
sp|P50502|F10A1_HUMAN;sp|Q8NFI4|F10A5_HUMAN;sp|Q8IZP2|ST134_HUMAN	F10A1_HUMAN	ST13	0.961065	0.980339	0.340896	1.07626
sp|P45880|VDAC2_HUMAN	VDAC2_HUMAN	VDAC2	1.19269	1.0921	0.340501	1.26387
sp|P62917|RL8_HUMAN	RL8_HUMAN	RPL8	4.013	2.00325	0.339116	1.02174
sp|Q9HB71|CYBP_HUMAN	CYBP_HUMAN	#N/A	#N/A	#N/A	0.334471	0.986768
sp|Q7Z589|EMSY_HUMAN	EMSY_HUMAN	EMSY	1.09686	1.04731	0.333184	-1.18809
sp|Q09666|AHNK_HUMAN	AHNK_HUMAN	#N/A	#N/A	#N/A	0.332603	1.12718
sp|P23528|COF1_HUMAN	COF1_HUMAN	#N/A	#N/A	#N/A	0.332599	0.957109
sp|Q59GN2|R39L5_HUMAN;sp|P62891|RL39_HUMAN	R39L5_HUMAN	RPL39P5	0	0	0.332399	-0.98003
sp|Q8NEN9|PDZD8_HUMAN	PDZD8_HUMAN	PDZD8	7.81985	2.7964	0.331744	1.16552
sp|Q13427|PPIG_HUMAN	PPIG_HUMAN	PPIG	1.57957	1.25681	0.331178	-0.983452
sp|Q6P996|PDXD1_HUMAN	PDXD1_HUMAN	PDXDC1	4.66589	2.16007	0.331009	0.982877
sp|Q15365|PCBP1_HUMAN	PCBP1_HUMAN	PCBP1	2.78278	1.66817	0.329931	0.446535
sp|Q9P0T7|TMEM9_HUMAN	TMEM9_HUMAN	TMEM9	0	0	0.328019	0.588463
sp|Q96P47|AGAP3_HUMAN	AGAP3_HUMAN	#N/A	#N/A	#N/A	0.327984	0.882795
sp|Q8N3C0|ASCC3_HUMAN	ASCC3_HUMAN	#N/A	#N/A	#N/A	0.327907	1.06764
sp|Q53EU6|GPAT3_HUMAN	GPAT3_HUMAN	GPAT3	0	0	0.326262	0.802359
sp|O14776|TCRG1_HUMAN	TCRG1_HUMAN	TCERG1	0	0	0.324993	-0.748573
sp|Q96RL7|VP13A_HUMAN	VP13A_HUMAN	VPS13A	5.27406	2.29653	0.324891	1.23174
sp|P18206|VINC_HUMAN	VINC_HUMAN	VCL	3.1083	1.76304	0.324699	1.29773
sp|P20020|AT2B1_HUMAN	AT2B1_HUMAN	#N/A	#N/A	#N/A	0.322708	-1.09524
sp|P55196|AFAD_HUMAN	AFAD_HUMAN	#N/A	#N/A	#N/A	0.321687	1.1986
sp|P46779|RL28_HUMAN	RL28_HUMAN	RPL28	3.04999	1.74642	0.321583	0.48421
sp|Q9Y6Y8|S23IP_HUMAN	S23IP_HUMAN	SEC23IP	3.97766	1.99441	0.32145	0.912816
sp|Q9H8G2|CAAP1_HUMAN	CAAP1_HUMAN	#N/A	#N/A	#N/A	0.320686	0.698987
sp|O95433|AHSA1_HUMAN	AHSA1_HUMAN	#N/A	#N/A	#N/A	0.320654	0.774908
sp|Q9UHQ9|NB5R1_HUMAN	NB5R1_HUMAN	CYB5R1	2.96762	1.72268	0.318931	1.02371
sp|O00483|NDUA4_HUMAN	NDUA4_HUMAN	NDUFA4	0	0	0.318178	0.833372
sp|Q14C86|GAPD1_HUMAN	GAPD1_HUMAN	GAPVD1	12.5318	3.54003	0.317453	1.42874
sp|Q5JTC6|AMER1_HUMAN	AMER1_HUMAN	#N/A	#N/A	#N/A	0.317371	0.361278
sp|Q5HYK7|SH319_HUMAN	SH319_HUMAN	SH3D19	0	0	0.316959	-0.744177
sp|O75152|ZC11A_HUMAN	ZC11A_HUMAN	ZC3H11A	1.71668	1.31022	0.316452	-0.906265
sp|Q14318|FKBP8_HUMAN	FKBP8_HUMAN	FKBP8	3.92897	1.98216	0.315344	0.559774
sp|O95721|SNP29_HUMAN	SNP29_HUMAN	SNAP29	3.84991	1.96212	0.314069	0.820116
sp|P84098|RL19_HUMAN	RL19_HUMAN	RPL19	2.85407	1.6894	0.313726	-0.336372
sp|P62241|RS8_HUMAN	RS8_HUMAN	RPS8	3.25518	1.80421	0.311946	0.343608
sp|Q5VW38|GP107_HUMAN	GP107_HUMAN	#N/A	#N/A	#N/A	0.311085	-0.388293
sp|Q99733|NP1L4_HUMAN	NP1L4_HUMAN	NAP1L4	0	0	0.309698	0.780147
sp|P37802|TAGL2_HUMAN	TAGL2_HUMAN	TAGLN2	3.7604	1.93917	0.30953	0.602369
sp|P62424|RL7A_HUMAN	RL7A_HUMAN	RPL7A	0	0	0.308677	0.752017
sp|Q15388|TOM20_HUMAN	TOM20_HUMAN	TOMM20	1.03644	1.01806	0.307905	0.957644
sp|Q2M1P5|KIF7_HUMAN	KIF7_HUMAN	KIF7	2.33523	1.52815	0.306877	0.66428
sp|Q14684|RRP1B_HUMAN	RRP1B_HUMAN	RRP1B	6.15054	2.48003	0.306815	0.48378
sp|Q96R06|SPAG5_HUMAN	SPAG5_HUMAN	SPAG5	1.13803	1.06679	0.306268	-0.821368
sp|O43491|E41L2_HUMAN	E41L2_HUMAN	#N/A	#N/A	#N/A	0.305129	-0.949683
sp|Q9H0A0|NAT10_HUMAN	NAT10_HUMAN	NAT10	4.35287	2.08635	0.304134	1.03739
sp|Q9NR09|BIRC6_HUMAN	BIRC6_HUMAN	#N/A	#N/A	#N/A	0.303328	-1.23146
sp|Q13136|LIPA1_HUMAN	LIPA1_HUMAN	PPFIA1	3.03231	1.74135	0.302713	-0.755991
sp|P26374|RAE2_HUMAN	RAE2_HUMAN	CHML	3.90612	1.97639	0.302631	0.924144
sp|P23284|PPIB_HUMAN	PPIB_HUMAN	PPIB	0	0	0.302273	0.664111
sp|Q99707|METH_HUMAN	METH_HUMAN	MTR	1.46043	1.20848	0.301704	-1.27534
sp|Q8TEV9|SMCR8_HUMAN	SMCR8_HUMAN	SMCR8	2.52352	1.58856	0.30002	-1.25138
sp|Q86XI2|CNDG2_HUMAN	CNDG2_HUMAN	#N/A	#N/A	#N/A	0.299908	0.567583
sp|Q13576|IQGA2_HUMAN	IQGA2_HUMAN	IQGAP2	553.931	23.5357	0.298552	0.338956
sp|O14641|DVL2_HUMAN	DVL2_HUMAN	#N/A	#N/A	#N/A	0.297378	0.700679
sp|P37198|NUP62_HUMAN	NUP62_HUMAN	#N/A	#N/A	#N/A	0.296814	-0.363172
sp|O15498|YKT6_HUMAN	YKT6_HUMAN	YKT6	4.46042	2.11197	0.296616	0.37056
sp|Q9NQC7|CYLD_HUMAN	CYLD_HUMAN	#N/A	#N/A	#N/A	0.296299	0.76397
sp|Q5HYI7|MTX3_HUMAN	MTX3_HUMAN	MTX3	1.85179	1.3608	0.296018	-0.870231
sp|Q8IWC1|MA7D3_HUMAN	MA7D3_HUMAN	MAP7D3	2.98183	1.7268	0.294301	0.926764
sp|P61513|RL37A_HUMAN	RL37A_HUMAN	RPL37A	3.20372	1.78989	0.294205	0.689998
sp|Q7Z478|DHX29_HUMAN	DHX29_HUMAN	#N/A	#N/A	#N/A	0.294097	1.06017
sp|P45974|UBP5_HUMAN	UBP5_HUMAN	USP5	0	0	0.293294	-0.7443
sp|Q8N6R0|MET13_HUMAN	MET13_HUMAN	METTL13	4.98989	2.23381	0.292959	0.706051
sp|Q8WVM8|SCFD1_HUMAN	SCFD1_HUMAN	SCFD1	2.19446	1.48137	0.292647	0.544857
sp|Q9NR30|DDX21_HUMAN	DDX21_HUMAN	#N/A	#N/A	#N/A	0.292582	0.358831
sp|Q8IXI1|MIRO2_HUMAN	MIRO2_HUMAN	RHOT2	2.97195	1.72393	0.292142	0.88498
sp|Q5SW79|CE170_HUMAN	CE170_HUMAN	#N/A	#N/A	#N/A	0.290716	1.20323
sp|Q8IYU8|MICU2_HUMAN	MICU2_HUMAN	MICU2	0	0	0.289084	0.60678
sp|Q5JTH9|RRP12_HUMAN	RRP12_HUMAN	RRP12	7.82707	2.79769	0.288706	-0.395238
sp|Q9Y217|MTMR6_HUMAN	MTMR6_HUMAN	MTMR6	2.49992	1.58111	0.288131	0.494853
sp|Q6P995|F171B_HUMAN	F171B_HUMAN	FAM171B	0	0	0.286946	0.616368
sp|Q93008|USP9X_HUMAN	USP9X_HUMAN	USP9X	1.83457	1.35446	0.286127	0.567229
sp|Q96KP1|EXOC2_HUMAN	EXOC2_HUMAN	EXOC2	22.2937	4.72162	0.283852	0.757499
sp|P46782|RS5_HUMAN	RS5_HUMAN	RPS5	4.93294	2.22102	0.283637	0.990214
sp|Q16543|CDC37_HUMAN	CDC37_HUMAN	#N/A	#N/A	#N/A	0.280891	0.642029
sp|Q9Y2Z0|SGT1_HUMAN	SGT1_HUMAN	SUGT1	4.0047	2.00118	0.280016	0.921273
sp|O60566|BUB1B_HUMAN	BUB1B_HUMAN	#N/A	#N/A	#N/A	0.279668	0.962882
sp|Q99878|H2A1J_HUMAN;sp|Q96KK5|H2A1H_HUMAN;sp|Q9BTM1|H2AJ_HUMAN;sp|Q16777|H2A2C_HUMAN;sp|Q93077|H2A1C_HUMAN;sp|Q7L7L0|H2A3_HUMAN;sp|Q6FI13|H2A2A_HUMAN;sp|P20671|H2A1D_HUMAN;sp|P0C0S8|H2A1_HUMAN;sp|P04908|H2A1B_HUMAN;sp|Q71UI9|H2AV_HUMAN;sp|P0C0S5|H2AZ_HUMAN;sp|Q96QV6|H2A1A_HUMAN;sp|P16104|H2AX_HUMAN	H2A1J_HUMAN	HIST1H2AJ	0	0	0.279348	0.746498
sp|Q9UNL2|SSRG_HUMAN	SSRG_HUMAN	#N/A	#N/A	#N/A	0.278882	0.351613
sp|Q5SQN1|SNP47_HUMAN	SNP47_HUMAN	SNAP47	0	0	0.277349	-0.751912
sp|P42766|RL35_HUMAN	RL35_HUMAN	RPL35	3.87933	1.9696	0.276532	-0.327366
sp|Q14839|CHD4_HUMAN	CHD4_HUMAN	#N/A	#N/A	#N/A	0.274236	1.05562
sp|P26373|RL13_HUMAN	RL13_HUMAN	RPL13	2.92044	1.70893	0.273929	0.374612
sp|Q9C0B7|TNG6_HUMAN	TNG6_HUMAN	TANGO6	1.2914	1.1364	0.273079	-0.685006
sp|Q96C57|CL043_HUMAN	CL043_HUMAN	#N/A	#N/A	#N/A	0.270238	0.669933
sp|P26641|EF1G_HUMAN	EF1G_HUMAN	#N/A	#N/A	#N/A	0.269822	0.487924
sp|Q96EY4|TMA16_HUMAN	TMA16_HUMAN	TMA16	3.2731	1.80917	0.269727	0.90135
sp|P49207|RL34_HUMAN	RL34_HUMAN	RPL34	2.62667	1.6207	0.266195	0.428726
sp|Q92878|RAD50_HUMAN	RAD50_HUMAN	RAD50	3.55355	1.88509	0.265348	0.919082
sp|Q8NEY1|NAV1_HUMAN	NAV1_HUMAN	NAV1	0	0	0.265117	-0.506573
sp|Q8WTT2|NOC3L_HUMAN	NOC3L_HUMAN	NOC3L	4.67791	2.16285	0.263536	0.781466
sp|Q9Y6B6|SAR1B_HUMAN	SAR1B_HUMAN	SAR1B	0	0	0.263386	0.584435
sp|Q8TEP8|CE192_HUMAN	CE192_HUMAN	#N/A	#N/A	#N/A	0.263234	1.13886
sp|Q8TAG9|EXOC6_HUMAN	EXOC6_HUMAN	EXOC6	3.11922	1.76613	0.261393	0.348144
sp|P52789|HXK2_HUMAN	HXK2_HUMAN	HK2	6.83291	2.61398	0.261311	1.00545
sp|Q8IY81|SPB1_HUMAN	SPB1_HUMAN	FTSJ3	3.84776	1.96157	0.261231	0.597258
sp|Q9Y3C1|NOP16_HUMAN	NOP16_HUMAN	NOP16	5.14556	2.26838	0.260586	0.753028
sp|O75431|MTX2_HUMAN	MTX2_HUMAN	MTX2	0	0	0.257442	-0.573372
sp|O95819|M4K4_HUMAN	M4K4_HUMAN	MAP4K4	7.72648	2.77966	0.257102	0.804737
sp|P50914|RL14_HUMAN	RL14_HUMAN	RPL14	0	0	0.256345	0.374617
sp|Q8TC07|TBC15_HUMAN	TBC15_HUMAN	TBC1D15	5.46323	2.33736	0.255286	0.9321
sp|O75976|CBPD_HUMAN	CBPD_HUMAN	#N/A	#N/A	#N/A	0.253486	0.896857
sp|P49674|KC1E_HUMAN	KC1E_HUMAN	CSNK1E	0	0	0.252579	-0.465622
sp|Q9NWB6|ARGL1_HUMAN	ARGL1_HUMAN	#N/A	#N/A	#N/A	0.25256	-0.868472
sp|Q9BXK5|B2L13_HUMAN	B2L13_HUMAN	#N/A	#N/A	#N/A	0.250828	0.515397
sp|Q00341|VIGLN_HUMAN	VIGLN_HUMAN	HDLBP	3.57827	1.89163	0.25081	-1.13973
sp|Q9UKJ3|GPTC8_HUMAN	GPTC8_HUMAN	GPATCH8	2.02625	1.42346	0.248461	0.454
sp|P62750|RL23A_HUMAN	RL23A_HUMAN	RPL23A	3.90516	1.97615	0.248244	0.290718
sp|Q9Y3P9|RBGP1_HUMAN	RBGP1_HUMAN	RABGAP1	5.81679	2.4118	0.248233	-0.626615
sp|Q9NRA8|4ET_HUMAN	4ET_HUMAN	#N/A	#N/A	#N/A	0.246926	-0.890951
sp|P15924|DESP_HUMAN	DESP_HUMAN	#N/A	#N/A	#N/A	0.246249	1.00801
sp|P15531|NDKA_HUMAN	NDKA_HUMAN	NME1	9.70531	3.11533	0.246094	0.592667
sp|Q9H3U1|UN45A_HUMAN	UN45A_HUMAN	UNC45A	4.64635	2.15554	0.245813	1.03284
sp|Q9BXW9|FACD2_HUMAN	FACD2_HUMAN	FANCD2	1.47377	1.21399	0.245204	0.610171
sp|Q92574|TSC1_HUMAN	TSC1_HUMAN	TSC1	8.80791	2.96781	0.245196	0.592399
sp|P50990|TCPQ_HUMAN	TCPQ_HUMAN	CCT8	8.78098	2.96327	0.244868	-0.441003
sp|Q96AG3|S2546_HUMAN	S2546_HUMAN	SLC25A46	9.99235	3.16107	0.244548	0.605009
sp|P11142|HSP7C_HUMAN	HSP7C_HUMAN	HSPA8	5.30938	2.30421	0.244174	0.682614
sp|Q9C0C4|SEM4C_HUMAN	SEM4C_HUMAN	SEMA4C	4.47767	2.11605	0.239691	0.627439
sp|Q70CQ3|UBP30_HUMAN	UBP30_HUMAN	USP30	2.09236	1.4465	0.239292	0.697584
sp|Q9NZC7|WWOX_HUMAN	WWOX_HUMAN	WWOX	3.31078	1.81956	0.238271	0.660831
sp|Q6R327|RICTR_HUMAN	RICTR_HUMAN	RICTOR	0	0	0.23818	0.466046
sp|Q9NRZ9|HELLS_HUMAN	HELLS_HUMAN	HELLS	3.41094	1.84687	0.237865	0.730251
sp|Q562F6|SGO2_HUMAN	SGO2_HUMAN	SGO2	1.80696	1.34423	0.237772	-0.963026
sp|Q9HCK8|CHD8_HUMAN	CHD8_HUMAN	#N/A	#N/A	#N/A	0.236231	1.2547
sp|Q9UQR0|SCML2_HUMAN	SCML2_HUMAN	SCML2	9.172	3.02853	0.235642	0.344027
sp|Q15042|RB3GP_HUMAN	RB3GP_HUMAN	RAB3GAP1	2.82241	1.68	0.234559	-0.960711
sp|Q9UPQ3|AGAP1_HUMAN	AGAP1_HUMAN	#N/A	#N/A	#N/A	0.234489	0.689762
sp|P49588|SYAC_HUMAN	SYAC_HUMAN	AARS	9.28165	3.04658	0.232273	0.503225
sp|Q05655|KPCD_HUMAN	KPCD_HUMAN	PRKCD	2.15843	1.46916	0.232239	0.544508
sp|P10809|CH60_HUMAN	CH60_HUMAN	#N/A	#N/A	#N/A	0.231856	-0.716388
sp|Q9P258|RCC2_HUMAN	RCC2_HUMAN	RCC2	1.82883	1.35234	0.231755	0.554504
sp|Q9Y3U8|RL36_HUMAN	RL36_HUMAN	RPL36	2.81181	1.67685	0.230645	0.497762
sp|Q8IZH2|XRN1_HUMAN	XRN1_HUMAN	XRN1	5.17654	2.2752	0.230039	1.03045
sp|Q14157|UBP2L_HUMAN	UBP2L_HUMAN	UBAP2L	1.95971	1.3999	0.228503	-0.727493
sp|Q86SQ0|PHLB2_HUMAN	PHLB2_HUMAN	PHLDB2	5.1027	2.25892	0.228316	0.761514
sp|Q9UKF6|CPSF3_HUMAN	CPSF3_HUMAN	#N/A	#N/A	#N/A	0.228045	-0.740546
sp|Q8IZT6|ASPM_HUMAN	ASPM_HUMAN	#N/A	#N/A	#N/A	0.228009	0.591598
sp|P62266|RS23_HUMAN	RS23_HUMAN	RPS23	4.68016	2.16337	0.227739	0.332497
sp|O76094|SRP72_HUMAN	SRP72_HUMAN	SRP72	0	0	0.226764	0.493961
sp|Q68DQ2|CRBG3_HUMAN	CRBG3_HUMAN	#N/A	#N/A	#N/A	0.226541	-1.07603
sp|P43121|MUC18_HUMAN	MUC18_HUMAN	MCAM	0	0	0.226161	0.542793
sp|O75694|NU155_HUMAN	NU155_HUMAN	NUP155	2.83344	1.68328	0.225438	-0.931237
sp|Q96AC1|FERM2_HUMAN	FERM2_HUMAN	FERMT2	1.24179	1.11435	0.225292	-0.525604
sp|O95248|MTMR5_HUMAN	MTMR5_HUMAN	SBF1	1.25946	1.12226	0.223024	-0.844933
sp|Q8NF91|SYNE1_HUMAN	SYNE1_HUMAN	SYNE1	5.29955	2.30207	0.222431	0.851232
sp|P60891|PRPS1_HUMAN;sp|P21108|PRPS3_HUMAN;sp|P11908|PRPS2_HUMAN	PRPS1_HUMAN	PRPS1	0	0	0.222239	0.533178
sp|P34932|HSP74_HUMAN	HSP74_HUMAN	HSPA4	0	0	0.221748	-0.630572
sp|Q9Y2L1|RRP44_HUMAN	RRP44_HUMAN	DIS3	0	0	0.221131	0.519929
sp|A1X283|SPD2B_HUMAN	SPD2B_HUMAN	SH3PXD2B	1.39151	1.17962	0.220679	0.557758
sp|P42566|EPS15_HUMAN	EPS15_HUMAN	#N/A	#N/A	#N/A	0.219546	-0.661508
sp|Q9H4A3|WNK1_HUMAN	WNK1_HUMAN	WNK1	1.90922	1.38175	0.219515	-0.52766
sp|O14966|RAB7L_HUMAN	RAB7L_HUMAN	RAB29	2.86433	1.69243	0.218512	0.597763
sp|O43432|IF4G3_HUMAN	IF4G3_HUMAN	EIF4G3	0	0	0.217995	-0.666371
sp|Q15361|TTF1_HUMAN	TTF1_HUMAN	TTF1	2.65216	1.62855	0.216142	-0.934408
sp|Q9Y6M7|S4A7_HUMAN	S4A7_HUMAN	SLC4A7	3.96221	1.99053	0.215006	0.818317
sp|Q92997|DVL3_HUMAN	DVL3_HUMAN	#N/A	#N/A	#N/A	0.214736	-0.753303
sp|Q9NR12|PDLI7_HUMAN	PDLI7_HUMAN	PDLIM7	2.56308	1.60096	0.214384	0.395279
sp|O14967|CLGN_HUMAN	CLGN_HUMAN	#N/A	#N/A	#N/A	0.213127	0.341401
sp|P09874|PARP1_HUMAN	PARP1_HUMAN	PARP1	4.2664	2.06553	0.21273	0.417623
sp|P36873|PP1G_HUMAN;sp|P62136|PP1A_HUMAN	PP1G_HUMAN	PPP1CC	0	0	0.212447	0.337067
sp|Q93009|UBP7_HUMAN	UBP7_HUMAN	USP7	0	0	0.211385	-0.498227
sp|Q04637|IF4G1_HUMAN	IF4G1_HUMAN	EIF4G1	6.2416	2.49832	0.210163	0.90732
sp|Q8NBF2|NHLC2_HUMAN	NHLC2_HUMAN	NHLRC2	0	0	0.210127	0.25883
sp|P78310|CXAR_HUMAN	CXAR_HUMAN	#N/A	#N/A	#N/A	0.209194	0.49104
sp|Q9Y2X9|ZN281_HUMAN	ZN281_HUMAN	ZNF281	0	0	0.20545	0.566297
sp|P50747|BPL1_HUMAN	BPL1_HUMAN	#N/A	#N/A	#N/A	0.202272	-0.622831
sp|E9PRG8|CK098_HUMAN	CK098_HUMAN	#N/A	#N/A	#N/A	0.201725	0.533071
sp|P30837|AL1B1_HUMAN	AL1B1_HUMAN	#N/A	#N/A	#N/A	0.20113	-0.25682
sp|P25685|DNJB1_HUMAN	DNJB1_HUMAN	#N/A	#N/A	#N/A	0.20017	-0.638719
sp|P51648|AL3A2_HUMAN	AL3A2_HUMAN	#N/A	#N/A	#N/A	0.199724	0.205608
sp|Q9BZF3|OSBL6_HUMAN	OSBL6_HUMAN	OSBPL6	3.96593	1.99146	0.199489	0.668077
sp|Q96P70|IPO9_HUMAN	IPO9_HUMAN	IPO9	0	0	0.19762	0.424246
sp|P20340|RAB6A_HUMAN	RAB6A_HUMAN	RAB6A	18.8643	4.34331	0.196641	-0.852062
sp|Q04721|NOTC2_HUMAN	NOTC2_HUMAN	NOTCH2	3.97855	1.99463	0.196335	0.605832
sp|Q99614|TTC1_HUMAN	TTC1_HUMAN	TTC1	0	0	0.19485	-0.548685
sp|P13861|KAP2_HUMAN	KAP2_HUMAN	PRKAR2A	3.89449	1.97344	0.194063	0.641485
sp|Q14160|SCRIB_HUMAN	SCRIB_HUMAN	SCRIB	0	0	0.19399	0.714875
sp|Q9NU22|MDN1_HUMAN	MDN1_HUMAN	MDN1	6.48757	2.54707	0.191128	0.818038
sp|Q8IZJ1|UNC5B_HUMAN	UNC5B_HUMAN	UNC5B	2.62269	1.61947	0.190984	-0.635844
sp|Q5JSH3|WDR44_HUMAN	WDR44_HUMAN	WDR44	5.37027	2.31738	0.189921	0.704245
sp|P60468|SC61B_HUMAN	SC61B_HUMAN	SEC61B	3.63555	1.90671	0.189789	0.642129
sp|P49069|CAMLG_HUMAN	CAMLG_HUMAN	#N/A	#N/A	#N/A	0.18875	0.609937
sp|O95373|IPO7_HUMAN	IPO7_HUMAN	IPO7	1.22642	1.10744	0.188094	-0.740404
sp|O95202|LETM1_HUMAN	LETM1_HUMAN	LETM1	6.0841	2.4666	0.185959	-0.722614
sp|Q16650|TBR1_HUMAN	TBR1_HUMAN	TBR1	0	0	0.185691	-0.381072
sp|Q1ED39|KNOP1_HUMAN	KNOP1_HUMAN	KNOP1	3.9967	1.99918	0.184359	0.591518
sp|Q5VWG9|TAF3_HUMAN	TAF3_HUMAN	#N/A	#N/A	#N/A	0.183549	0.22285
sp|Q3SY69|AL1L2_HUMAN	AL1L2_HUMAN	#N/A	#N/A	#N/A	0.183437	0.601045
sp|Q9UM54|MYO6_HUMAN	MYO6_HUMAN	MYO6	5.76755	2.40157	0.181973	0.558171
sp|Q9HAV4|XPO5_HUMAN	XPO5_HUMAN	XPO5	3.1945	1.78732	0.181594	-0.218338
sp|Q8WVS4|WDR60_HUMAN	WDR60_HUMAN	WDR60	2.09157	1.44623	0.180635	-0.656065
sp|Q9Y5V3|MAGD1_HUMAN	MAGD1_HUMAN	MAGED1	6.66076	2.58084	0.178932	0.352102
sp|Q02978|M2OM_HUMAN	M2OM_HUMAN	SLC25A11	0	0	0.176613	-0.419915
sp|Q9Y388|RBMX2_HUMAN	RBMX2_HUMAN	RBMX2	0	0	0.173926	0.507932
sp|Q15382|RHEB_HUMAN	RHEB_HUMAN	RHEB	28.2484	5.31492	0.173689	0.926749
sp|P61006|RAB8A_HUMAN	RAB8A_HUMAN	RAB8A	86.868	9.3203	0.17326	-0.855131
sp|Q14683|SMC1A_HUMAN	SMC1A_HUMAN	SMC1A	3.17358	1.78146	0.172941	0.66761
sp|P62081|RS7_HUMAN	RS7_HUMAN	RPS7	0	0	0.17208	-0.280364
sp|Q8WU79|SMAP2_HUMAN	SMAP2_HUMAN	SMAP2	0	0	0.172016	0.291756
sp|Q15942|ZYX_HUMAN	ZYX_HUMAN	ZYX	1.33027	1.15337	0.171708	0.404583
sp|P42677|RS27_HUMAN	RS27_HUMAN	RPS27	3.51845	1.87575	0.169596	0.29146
sp|Q9Y5M8|SRPRB_HUMAN	SRPRB_HUMAN	SRPRB	4.05443	2.01356	0.169576	0.676123
sp|Q8IWS0|PHF6_HUMAN	PHF6_HUMAN	PHF6	6.65116	2.57899	0.168481	0.613539
sp|Q96AQ6|PBIP1_HUMAN	PBIP1_HUMAN	PBXIP1	0	0	0.167527	0.290355
sp|Q16822|PCKGM_HUMAN	PCKGM_HUMAN	PCK2	0	0	0.167425	0.259224
sp|P29597|TYK2_HUMAN	TYK2_HUMAN	TYK2	3.46049	1.86024	0.167208	0.627337
sp|Q14241|ELOA1_HUMAN	ELOA1_HUMAN	#N/A	#N/A	#N/A	0.166966	0.666819
sp|P54136|SYRC_HUMAN	SYRC_HUMAN	RARS	2.3041	1.51793	0.163353	0.366314
sp|E9PAV3|NACAM_HUMAN;sp|Q13765|NACA_HUMAN	NACAM_HUMAN	NACA	1.58148	1.25757	0.162874	0.604408
sp|Q96HY6|DDRGK_HUMAN	DDRGK_HUMAN	#N/A	#N/A	#N/A	0.160955	-0.458714
sp|O75179|ANR17_HUMAN	ANR17_HUMAN	#N/A	#N/A	#N/A	0.160595	0.677484
sp|Q9NX58|LYAR_HUMAN	LYAR_HUMAN	LYAR	4.55234	2.13362	0.160201	-0.259725
sp|Q96HS1|PGAM5_HUMAN	PGAM5_HUMAN	PGAM5	2.36318	1.53727	0.15945	0.360516
sp|P04049|RAF1_HUMAN	RAF1_HUMAN	RAF1	0	0	0.15664	0.256743
sp|Q9HCL2|GPAT1_HUMAN	GPAT1_HUMAN	GPAM	2.17872	1.47605	0.155851	-0.530816
sp|Q9NZZ3|CHMP5_HUMAN	CHMP5_HUMAN	#N/A	#N/A	#N/A	0.15347	0.424101
sp|Q13625|ASPP2_HUMAN	ASPP2_HUMAN	#N/A	#N/A	#N/A	0.153107	-0.46065
sp|P06737|PYGL_HUMAN	PYGL_HUMAN	PYGL	0	0	0.15169	-0.250972
sp|P42695|CNDD3_HUMAN	CNDD3_HUMAN	#N/A	#N/A	#N/A	0.151148	0.343974
sp|P48067|SC6A9_HUMAN	SC6A9_HUMAN	SLC6A9	0	0	0.150667	0.316326
sp|Q6GYQ0|RGPA1_HUMAN	RGPA1_HUMAN	RALGAPA1	1.79638	1.34029	0.150334	0.345746
sp|P48651|PTSS1_HUMAN	PTSS1_HUMAN	PTDSS1	1.50122	1.22524	0.150001	0.398542
sp|P21127|CD11B_HUMAN;sp|Q9UQ88|CD11A_HUMAN	CD11B_HUMAN	#N/A	#N/A	#N/A	0.149864	-0.393465
sp|Q8N0X7|SPG20_HUMAN	SPG20_HUMAN	SPART	3.10966	1.76342	0.148766	0.499734
sp|O15440|MRP5_HUMAN	MRP5_HUMAN	ABCC5	0	0	0.148679	-0.373336
sp|Q6P3W7|SCYL2_HUMAN	SCYL2_HUMAN	SCYL2	2.58944	1.60917	0.147476	0.601906
sp|Q8NFC6|BD1L1_HUMAN	BD1L1_HUMAN	#N/A	#N/A	#N/A	0.147474	0.240685
sp|Q9NZ52|GGA3_HUMAN	GGA3_HUMAN	#N/A	#N/A	#N/A	0.147451	-0.393985
sp|Q9BZF9|UACA_HUMAN	UACA_HUMAN	UACA	3.87974	1.96971	0.14714	0.557564
sp|Q14728|MFS10_HUMAN	MFS10_HUMAN	#N/A	#N/A	#N/A	0.145019	-0.20922
sp|P21397|AOFA_HUMAN	AOFA_HUMAN	#N/A	#N/A	#N/A	0.144106	0.842605
sp|P19367|HXK1_HUMAN	HXK1_HUMAN	HK1	7.6484	2.76557	0.143019	0.494574
sp|Q9UJF2|NGAP_HUMAN	NGAP_HUMAN	RASAL2	3.64028	1.90795	0.142878	-0.595307
sp|Q6UB35|C1TM_HUMAN	C1TM_HUMAN	#N/A	#N/A	#N/A	0.14232	0.393621
sp|P51610|HCFC1_HUMAN	HCFC1_HUMAN	HCFC1	3.02774	1.74004	0.140118	-0.622898
sp|Q9ULF5|S39AA_HUMAN	S39AA_HUMAN	SLC39A10	0	0	0.138874	0.276041
sp|Q7Z7G8|VP13B_HUMAN	VP13B_HUMAN	VPS13B	14.0255	3.74506	0.13867	0.447942
sp|Q9Y5Z9|UBIA1_HUMAN	UBIA1_HUMAN	UBIAD1	0	0	0.138086	0.406759
sp|Q9UHR5|S30BP_HUMAN	S30BP_HUMAN	SAP30BP	0	0	0.137921	0.329657
sp|Q9Y666|S12A7_HUMAN	S12A7_HUMAN	SLC12A7	0	0	0.137417	0.442777
sp|Q12959|DLG1_HUMAN	DLG1_HUMAN	#N/A	#N/A	#N/A	0.135863	-0.397785
sp|Q15907|RB11B_HUMAN	RB11B_HUMAN	RAB11B	1.89926	1.37814	0.134411	0.703268
sp|P36776|LONM_HUMAN	LONM_HUMAN	LONP1	0	0	0.13431	-0.360334
sp|Q7Z434|MAVS_HUMAN	MAVS_HUMAN	MAVS	5.28213	2.29829	0.134255	0.224412
sp|P62273|RS29_HUMAN	RS29_HUMAN	RPS29	1.5014	1.22532	0.132417	-0.606085
sp|P57088|TMM33_HUMAN	TMM33_HUMAN	TMEM33	0	0	0.130194	0.301864
sp|Q9H2M9|RBGPR_HUMAN	RBGPR_HUMAN	RAB3GAP2	3.48307	1.8663	0.129386	0.574254
sp|P49454|CENPF_HUMAN	CENPF_HUMAN	#N/A	#N/A	#N/A	0.128775	-0.421786
sp|Q9NZ45|CISD1_HUMAN	CISD1_HUMAN	#N/A	#N/A	#N/A	0.128413	-0.259466
sp|Q8WUX9|CHMP7_HUMAN	CHMP7_HUMAN	#N/A	#N/A	#N/A	0.126823	-0.308019
sp|P17066|HSP76_HUMAN	HSP76_HUMAN	HSPA6	0	0	0.12577	0.294777
sp|Q16643|DREB_HUMAN	DREB_HUMAN	#N/A	#N/A	#N/A	0.125491	0.210441
sp|P38646|GRP75_HUMAN	GRP75_HUMAN	HSPA9	9.98895	3.16053	0.124532	0.518056
sp|Q86UB9|TM135_HUMAN	TM135_HUMAN	TMEM135	0	0	0.124121	0.362643
sp|P63241|IF5A1_HUMAN;sp|Q6IS14|IF5AL_HUMAN;sp|Q9GZV4|IF5A2_HUMAN	IF5A1_HUMAN	EIF5A	0.70539	0.839875	0.123453	0.407324
sp|Q8IYB5|SMAP1_HUMAN	SMAP1_HUMAN	SMAP1	0	0	0.123353	-0.336449
sp|Q9NW68|BSDC1_HUMAN	BSDC1_HUMAN	#N/A	#N/A	#N/A	0.123254	0.168334
sp|O60271|JIP4_HUMAN	JIP4_HUMAN	SPAG9	3.62316	1.90346	0.123071	-0.448539
sp|Q15233|NONO_HUMAN	NONO_HUMAN	NONO	1.28695	1.13444	0.12013	-0.445051
sp|Q9H444|CHM4B_HUMAN	CHM4B_HUMAN	#N/A	#N/A	#N/A	0.119601	0.319392
sp|P53804|TTC3_HUMAN	TTC3_HUMAN	TTC3	1.69532	1.30204	0.11776	-0.446284
sp|P10909|CLUS_HUMAN	CLUS_HUMAN	#N/A	#N/A	#N/A	0.116675	0.230399
sp|P16403|H12_HUMAN	H12_HUMAN	HIST1H1C	0	0	0.115993	-0.484113
sp|Q86T24|KAISO_HUMAN	KAISO_HUMAN	ZBTB33	2.23595	1.49531	0.115545	0.296184
sp|P50416|CPT1A_HUMAN	CPT1A_HUMAN	#N/A	#N/A	#N/A	0.115204	0.412872
sp|Q96GQ7|DDX27_HUMAN	DDX27_HUMAN	#N/A	#N/A	#N/A	0.114921	0.443829
sp|Q9BQ48|RM34_HUMAN	RM34_HUMAN	MRPL34	1.29522	1.13808	0.114072	-0.396881
sp|Q9UER7|DAXX_HUMAN	DAXX_HUMAN	#N/A	#N/A	#N/A	0.113554	-0.365111
sp|Q9HAU5|RENT2_HUMAN	RENT2_HUMAN	UPF2	1.75893	1.32625	0.113104	0.339675
sp|O95613|PCNT_HUMAN	PCNT_HUMAN	PCNT	14.4438	3.80049	0.11282	0.490753
sp|Q9NXE4|NSMA3_HUMAN	NSMA3_HUMAN	SMPD4	0	0	0.111928	0.219483
sp|A5YKK6|CNOT1_HUMAN	CNOT1_HUMAN	#N/A	#N/A	#N/A	0.111709	0.345477
sp|Q5JSL3|DOC11_HUMAN	DOC11_HUMAN	#N/A	#N/A	#N/A	0.111005	-0.472052
sp|P53985|MOT1_HUMAN	MOT1_HUMAN	SLC16A1	0	0	0.110403	0.421681
sp|Q5VT06|CE350_HUMAN	CE350_HUMAN	#N/A	#N/A	#N/A	0.109825	-0.366782
sp|O60749|SNX2_HUMAN	SNX2_HUMAN	SNX2	0	0	0.109632	0.259197
sp|P63173|RL38_HUMAN	RL38_HUMAN	RPL38	2.65541	1.62954	0.108805	0.373496
sp|Q9UNX3|RL26L_HUMAN	RL26L_HUMAN	RPL26L1	8.26478	2.87485	0.107522	-0.39291
sp|Q8TEU7|RPGF6_HUMAN	RPGF6_HUMAN	RAPGEF6	6.20207	2.4904	0.106026	0.461034
sp|Q8NI27|THOC2_HUMAN	THOC2_HUMAN	THOC2	3.71614	1.92773	0.105778	0.40952
sp|P56589|PEX3_HUMAN	PEX3_HUMAN	PEX3	1.17219	1.08268	0.105748	-0.345144
sp|P27348|1433T_HUMAN	1433T_HUMAN	#N/A	#N/A	#N/A	0.104511	0.16827
sp|Q8IYB3|SRRM1_HUMAN	SRRM1_HUMAN	SRRM1	5.14779	2.26887	0.104376	0.465696
sp|P28340|DPOD1_HUMAN	DPOD1_HUMAN	#N/A	#N/A	#N/A	0.104106	0.233406
sp|Q9UM00|TMCO1_HUMAN	TMCO1_HUMAN	TMCO1	0	0	0.103636	0.3233
sp|Q9UNF1|MAGD2_HUMAN	MAGD2_HUMAN	MAGED2	0	0	0.103554	-0.324716
sp|Q9BVV6|TALD3_HUMAN	TALD3_HUMAN	#N/A	#N/A	#N/A	0.103159	0.180404
sp|O76024|WFS1_HUMAN	WFS1_HUMAN	WFS1	0	0	0.10277	0.173348
sp|Q53EZ4|CEP55_HUMAN	CEP55_HUMAN	#N/A	#N/A	#N/A	0.101644	-0.222941
sp|P28288|ABCD3_HUMAN	ABCD3_HUMAN	#N/A	#N/A	#N/A	0.0987254	0.14369
sp|P49411|EFTU_HUMAN	EFTU_HUMAN	#N/A	#N/A	#N/A	0.0981839	0.237974
sp|Q96SU4|OSBL9_HUMAN	OSBL9_HUMAN	OSBPL9	0	0	0.0972616	-0.167066
sp|P29317|EPHA2_HUMAN	EPHA2_HUMAN	#N/A	#N/A	#N/A	0.0947481	0.148787
sp|Q99460|PSMD1_HUMAN	PSMD1_HUMAN	PSMD1	0	0	0.0947185	-0.395117
sp|Q9NSE4|SYIM_HUMAN	SYIM_HUMAN	IARS2	5.7137	2.39033	0.0947008	0.4382
sp|Q9Y2H6|FND3A_HUMAN	FND3A_HUMAN	#N/A	#N/A	#N/A	0.0945712	0.400851
sp|Q9H7Z3|NRDE2_HUMAN	NRDE2_HUMAN	NRDE2	2.0497	1.43168	0.0942176	-0.355206
sp|P51003|PAPOA_HUMAN	PAPOA_HUMAN	PAPOLA	1.86455	1.36548	0.0938195	0.235422
sp|Q9Y6M5|ZNT1_HUMAN	ZNT1_HUMAN	SLC30A1	0	0	0.0930598	-0.235403
sp|Q6P2Q9|PRP8_HUMAN	PRP8_HUMAN	PRPF8	3.84754	1.96151	0.0926483	-0.304293
sp|Q9Y613|FHOD1_HUMAN	FHOD1_HUMAN	#N/A	#N/A	#N/A	0.0919729	0.217418
sp|Q9NRN7|ADPPT_HUMAN	ADPPT_HUMAN	AASDHPPT	0	0	0.0917293	-0.169171
sp|Q9NX40|OCAD1_HUMAN	OCAD1_HUMAN	OCIAD1	2.88702	1.69912	0.0912872	-0.216704
sp|Q9HCD6|TANC2_HUMAN	TANC2_HUMAN	TANC2	7.4856	2.73598	0.0908564	0.214043
sp|P0DMV9|HS71B_HUMAN;sp|P0DMV8|HS71A_HUMAN	HS71B_HUMAN	HSPA1B	0	0	0.0906188	0.213912
sp|O94842|TOX4_HUMAN	TOX4_HUMAN	TOX4	3.67534	1.91712	0.0898948	0.382725
sp|Q05823|RN5A_HUMAN	RN5A_HUMAN	RNASEL	0.964043	0.981857	0.0897583	0.210614
sp|Q9Y2J2|E41L3_HUMAN	E41L3_HUMAN	#N/A	#N/A	#N/A	0.0889876	0.326421
sp|Q9P2J5|SYLC_HUMAN	SYLC_HUMAN	LARS	1.66076	1.28871	0.0874317	0.271016
sp|Q9ULM3|YETS2_HUMAN	YETS2_HUMAN	YEATS2	3.93869	1.98461	0.0871125	-0.372352
sp|Q6WCQ1|MPRIP_HUMAN	MPRIP_HUMAN	MPRIP	0	0	0.0866131	0.186434
sp|P07195|LDHB_HUMAN	LDHB_HUMAN	LDHB	0	0	0.0863006	0.290631
sp|Q2M2I8|AAK1_HUMAN	AAK1_HUMAN	#N/A	#N/A	#N/A	0.0856009	0.231348
sp|Q8WVX9|FACR1_HUMAN	FACR1_HUMAN	#N/A	#N/A	#N/A	0.0854138	0.138915
sp|Q86W92|LIPB1_HUMAN	LIPB1_HUMAN	PPFIBP1	5.98772	2.44698	0.0852555	0.196236
sp|Q9P2D6|F135A_HUMAN	F135A_HUMAN	#N/A	#N/A	#N/A	0.0848839	0.292122
sp|Q9H3S7|PTN23_HUMAN	PTN23_HUMAN	PTPN23	0	0	0.0841101	-0.252237
sp|P78371|TCPB_HUMAN	TCPB_HUMAN	CCT2	2.32774	1.52569	0.0838002	-0.350319
sp|Q14694|UBP10_HUMAN	UBP10_HUMAN	USP10	7.08998	2.6627	0.0815047	-0.240882
sp|Q8NFA0|UBP32_HUMAN	UBP32_HUMAN	USP32	0	0	0.0805683	0.194698
sp|Q9BSJ8|ESYT1_HUMAN	ESYT1_HUMAN	#N/A	#N/A	#N/A	0.080344	-0.350689
sp|Q05397|FAK1_HUMAN	FAK1_HUMAN	#N/A	#N/A	#N/A	0.0800606	-0.151744
sp|P55209|NP1L1_HUMAN	NP1L1_HUMAN	NAP1L1	11.2889	3.35989	0.0793207	0.270644
sp|Q96PV7|F193B_HUMAN	F193B_HUMAN	#N/A	#N/A	#N/A	0.0792463	0.0993262
sp|Q9C0D5|TANC1_HUMAN	TANC1_HUMAN	TANC1	4.36699	2.08973	0.0790739	0.272002
sp|O60343|TBCD4_HUMAN	TBCD4_HUMAN	TBC1D4	5.98639	2.44671	0.0781918	0.240358
sp|P51149|RAB7A_HUMAN	RAB7A_HUMAN	RAB7A	13.1616	3.62789	0.0766756	0.347608
sp|Q9Y4G8|RPGF2_HUMAN	RPGF2_HUMAN	RAPGEF2	0	0	0.0763249	0.167978
sp|Q63HN8|RN213_HUMAN	RN213_HUMAN	RNF213	29.4765	5.42923	0.0762454	0.250854
sp|Q8TB36|GDAP1_HUMAN	GDAP1_HUMAN	#N/A	#N/A	#N/A	0.076127	0.171786
sp|Q5T6F2|UBAP2_HUMAN	UBAP2_HUMAN	UBAP2	1.75627	1.32524	0.0759981	-0.285036
sp|Q71RC2|LARP4_HUMAN	LARP4_HUMAN	LARP4	0.828782	0.910374	0.0753733	0.245793
sp|Q99615|DNJC7_HUMAN	DNJC7_HUMAN	#N/A	#N/A	#N/A	0.0753427	-0.278877
sp|Q71U36|TBA1A_HUMAN	TBA1A_HUMAN	TUBA1A	0	0	0.0746237	0.204757
sp|P22392|NDKB_HUMAN;sp|O60361|NDK8_HUMAN	NDKB_HUMAN	NME2	0	0	0.0744025	-0.259948
sp|Q8N5F7|NKAP_HUMAN	NKAP_HUMAN	NKAP	0	0	0.0741646	-0.254924
sp|Q709C8|VP13C_HUMAN	VP13C_HUMAN	VPS13C	5.85249	2.41919	0.0733501	-0.379944
sp|P62269|RS18_HUMAN	RS18_HUMAN	RPS18	3.24706	1.80196	0.0731044	0.211412
sp|Q4VCS5|AMOT_HUMAN	AMOT_HUMAN	#N/A	#N/A	#N/A	0.0716644	0.406937
sp|P61254|RL26_HUMAN	RL26_HUMAN	RPL26	4.79632	2.19005	0.0692728	-0.111567
sp|Q9ULK5|VANG2_HUMAN	VANG2_HUMAN	VANGL2	0	0	0.069237	0.179296
sp|O94874|UFL1_HUMAN	UFL1_HUMAN	UFL1	1.09389	1.04589	0.0682499	-0.271651
sp|P49321|NASP_HUMAN	NASP_HUMAN	NASP	1.63807	1.27987	0.0671437	0.267315
sp|Q9BZF1|OSBL8_HUMAN	OSBL8_HUMAN	OSBPL8	0.949223	0.974281	0.066725	0.182398
sp|P30048|PRDX3_HUMAN	PRDX3_HUMAN	PRDX3	4.03159	2.00788	0.0648794	0.186142
sp|P38432|COIL_HUMAN	COIL_HUMAN	#N/A	#N/A	#N/A	0.0643284	0.132919
sp|P20339|RAB5A_HUMAN	RAB5A_HUMAN	RAB5A	0	0	0.0638451	0.377577
sp|Q5T280|CI114_HUMAN	CI114_HUMAN	#N/A	#N/A	#N/A	0.0621989	0.179028
sp|O75061|AUXI_HUMAN	AUXI_HUMAN	#N/A	#N/A	#N/A	0.0621133	-0.0847753
sp|Q9Y5X1|SNX9_HUMAN	SNX9_HUMAN	SNX9	1.16598	1.0798	0.0620264	-0.245708
sp|O00203|AP3B1_HUMAN	AP3B1_HUMAN	#N/A	#N/A	#N/A	0.0619157	0.138881
sp|P07355|ANXA2_HUMAN;sp|A6NMY6|AXA2L_HUMAN	ANXA2_HUMAN	#N/A	#N/A	#N/A	0.0618582	-0.199988
sp|Q99996|AKAP9_HUMAN	AKAP9_HUMAN	#N/A	#N/A	#N/A	0.0616558	0.320441
sp|O00763|ACACB_HUMAN	ACACB_HUMAN	#N/A	#N/A	#N/A	0.0615335	-0.317866
sp|O75643|U520_HUMAN	U520_HUMAN	SNRNP200	5.31032	2.30441	0.0609777	0.213916
sp|P35606|COPB2_HUMAN	COPB2_HUMAN	#N/A	#N/A	#N/A	0.0608426	-0.123585
sp|Q9UL25|RAB21_HUMAN	RAB21_HUMAN	RAB21	0	0	0.0593762	0.153331
sp|O94813|SLIT2_HUMAN	SLIT2_HUMAN	SLIT2	7.53991	2.74589	0.0590617	0.232656
sp|P62899|RL31_HUMAN	RL31_HUMAN	RPL31	0	0	0.0581024	0.121823
sp|Q9P035|HACD3_HUMAN	HACD3_HUMAN	#N/A	#N/A	#N/A	0.0574823	0.0911527
sp|P42694|HELZ_HUMAN	HELZ_HUMAN	#N/A	#N/A	#N/A	0.0574143	-0.20421
sp|P78527|PRKDC_HUMAN	PRKDC_HUMAN	PRKDC	8.51447	2.91796	0.0572801	0.185107
sp|Q8N0U8|VKORL_HUMAN	VKORL_HUMAN	VKORC1L1	0	0	0.0571456	0.0897272
sp|O75533|SF3B1_HUMAN	SF3B1_HUMAN	SF3B1	1.13963	1.06753	0.0561487	-0.166491
sp|Q8WYP5|ELYS_HUMAN	ELYS_HUMAN	#N/A	#N/A	#N/A	0.0553002	0.110655
sp|Q9UPU7|TBD2B_HUMAN	TBD2B_HUMAN	TBC1D2B	11.3301	3.36602	0.0540697	0.150571
sp|Q8N0V3|RBFA_HUMAN	RBFA_HUMAN	RBFA	1.75798	1.32589	0.0539766	-0.161563
sp|Q9Y4I1|MYO5A_HUMAN	MYO5A_HUMAN	MYO5A	1.3745	1.17239	0.053824	0.13422
sp|P63010|AP2B1_HUMAN	AP2B1_HUMAN	#N/A	#N/A	#N/A	0.0531912	-0.124512
sp|Q13206|DDX10_HUMAN	DDX10_HUMAN	#N/A	#N/A	#N/A	0.0524651	0.210962
sp|Q15648|MED1_HUMAN	MED1_HUMAN	MED1	0	0	0.052127	0.106824
sp|O00443|P3C2A_HUMAN	P3C2A_HUMAN	PIK3C2A	15.2091	3.89988	0.0519859	-0.235419
sp|Q16181|SEPT7_HUMAN	SEPT7_HUMAN	SEPTIN7	3.61381	1.901	0.0517256	0.0834942
sp|O14654|IRS4_HUMAN	IRS4_HUMAN	IRS4	7.89317	2.80948	0.0513307	0.256068
sp|P51809|VAMP7_HUMAN	VAMP7_HUMAN	VAMP7	2.59845	1.61197	0.0506366	0.106788
sp|P39023|RL3_HUMAN	RL3_HUMAN	RPL3	1.6504	1.28468	0.0503149	0.168091
sp|P52292|IMA1_HUMAN	IMA1_HUMAN	KPNA2	1.38613	1.17734	0.0501552	0.138798
sp|P11171|41_HUMAN	41_HUMAN	#N/A	#N/A	#N/A	0.0500509	-0.21366
sp|P52732|KIF11_HUMAN	KIF11_HUMAN	KIF11	0	0	0.0491853	0.166477
sp|O75410|TACC1_HUMAN	TACC1_HUMAN	TACC1	3.27535	1.80979	0.0470329	0.255715
sp|Q92625|ANS1A_HUMAN	ANS1A_HUMAN	#N/A	#N/A	#N/A	0.0466556	0.143181
sp|Q96RT1|ERBIN_HUMAN	ERBIN_HUMAN	#N/A	#N/A	#N/A	0.045726	-0.0960806
sp|P05388|RLA0_HUMAN;sp|Q8NHW5|RLA0L_HUMAN	RLA0_HUMAN	RPLP0	0	0	0.0455933	0.0942848
sp|Q9UEY8|ADDG_HUMAN	ADDG_HUMAN	#N/A	#N/A	#N/A	0.0446452	-0.153166
sp|P06576|ATPB_HUMAN	ATPB_HUMAN	#N/A	#N/A	#N/A	0.0444536	-0.128028
sp|Q03001|DYST_HUMAN	DYST_HUMAN	#N/A	#N/A	#N/A	0.0436376	0.233504
sp|Q14145|KEAP1_HUMAN	KEAP1_HUMAN	KEAP1	6.68916	2.58634	0.0432528	0.0959094
sp|O95817|BAG3_HUMAN	BAG3_HUMAN	#N/A	#N/A	#N/A	0.0426294	-0.0758148
sp|Q9Y2I1|NISCH_HUMAN	NISCH_HUMAN	NISCH	1.25307	1.11941	0.0416414	0.159544
sp|P53396|ACLY_HUMAN	ACLY_HUMAN	#N/A	#N/A	#N/A	0.0414004	-0.0763034
sp|P52757|CHIO_HUMAN	CHIO_HUMAN	#N/A	#N/A	#N/A	0.0411906	-0.183938
sp|Q15390|MTFR1_HUMAN	MTFR1_HUMAN	MTFR1	0.744552	0.862874	0.0409261	-0.148461
sp|P08708|RS17_HUMAN	RS17_HUMAN	RPS17	1.97963	1.40699	0.0405471	-0.142362
sp|Q08945|SSRP1_HUMAN	SSRP1_HUMAN	SSRP1	0	0	0.0404131	-0.0982941
sp|P61353|RL27_HUMAN	RL27_HUMAN	RPL27	1.47754	1.21554	0.0403151	-0.13044
sp|P61758|PFD3_HUMAN	PFD3_HUMAN	VBP1	0	0	0.0397571	0.099532
sp|Q92616|GCN1_HUMAN	GCN1_HUMAN	#N/A	#N/A	#N/A	0.0397116	0.163788
sp|Q9HAS0|NJMU_HUMAN	NJMU_HUMAN	C17orf75	0	0	0.0396937	-0.0605283
sp|P40227|TCPZ_HUMAN	TCPZ_HUMAN	CCT6A	0	0	0.0387108	0.11867
sp|Q9HAD4|WDR41_HUMAN	WDR41_HUMAN	WDR41	3.76156	1.93947	0.0381046	0.156773
sp|Q16850|CP51A_HUMAN	CP51A_HUMAN	#N/A	#N/A	#N/A	0.0375749	0.0701162
sp|Q15208|STK38_HUMAN	STK38_HUMAN	STK38	0	0	0.0374494	0.131043
sp|Q9UPP1|PHF8_HUMAN	PHF8_HUMAN	PHF8	1.85198	1.36087	0.0368063	-0.116758
sp|Q12872|SFSWA_HUMAN	SFSWA_HUMAN	SFSWAP	2.32477	1.52472	0.0363512	-0.096705
sp|Q9H7C9|AAMDC_HUMAN	AAMDC_HUMAN	#N/A	#N/A	#N/A	0.0363332	0.10972
sp|Q8IVF7|FMNL3_HUMAN	FMNL3_HUMAN	#N/A	#N/A	#N/A	0.0354286	0.147519
sp|Q9H9A6|LRC40_HUMAN	LRC40_HUMAN	LRRC40	3.65052	1.91063	0.0354148	0.0638857
sp|Q8WW12|PCNP_HUMAN	PCNP_HUMAN	PCNP	1.64566	1.28283	0.0354072	-0.110281
sp|Q8IVF2|AHNK2_HUMAN	AHNK2_HUMAN	#N/A	#N/A	#N/A	0.0349925	0.185676
sp|Q9Y4W6|AFG32_HUMAN	AFG32_HUMAN	#N/A	#N/A	#N/A	0.0345896	-0.129512
sp|Q92540|SMG7_HUMAN	SMG7_HUMAN	SMG7	3.48423	1.86661	0.0343549	0.123459
sp|Q96S99|PKHF1_HUMAN	PKHF1_HUMAN	PLEKHF1	0	0	0.0340615	0.084949
sp|Q9BWH2|FUND2_HUMAN	FUND2_HUMAN	#N/A	#N/A	#N/A	0.0339134	0.0862452
sp|P53621|COPA_HUMAN	COPA_HUMAN	#N/A	#N/A	#N/A	0.0338644	0.0988023
sp|Q5SVZ6|ZMYM1_HUMAN	ZMYM1_HUMAN	ZMYM1	4.55151	2.13343	0.0337105	-0.144078
sp|Q9UHD8|SEPT9_HUMAN	SEPT9_HUMAN	SEPTIN9	1.73016	1.31535	0.0333082	-0.0768794
sp|P41252|SYIC_HUMAN	SYIC_HUMAN	IARS	0	0	0.0326907	0.0708259
sp|Q5VZ89|DEN4C_HUMAN	DEN4C_HUMAN	#N/A	#N/A	#N/A	0.0326466	-0.155204
sp|Q00005|2ABB_HUMAN;sp|P63151|2ABA_HUMAN;sp|Q66LE6|2ABD_HUMAN	2ABB_HUMAN	#N/A	#N/A	#N/A	0.0323651	0.0573792
sp|Q12789|TF3C1_HUMAN	TF3C1_HUMAN	GTF3C1	0	0	0.031853	-0.083922
sp|Q8NBU5|ATAD1_HUMAN	ATAD1_HUMAN	#N/A	#N/A	#N/A	0.0314738	-0.0629886
sp|P09651|ROA1_HUMAN;sp|Q32P51|RA1L2_HUMAN	ROA1_HUMAN	HNRNPA1	0	0	0.0309784	0.0629652
sp|O14976|GAK_HUMAN	GAK_HUMAN	#N/A	#N/A	#N/A	0.0306032	0.115936
sp|Q92968|PEX13_HUMAN	PEX13_HUMAN	PEX13	1.27166	1.12768	0.0303903	-0.082284
sp|O75376|NCOR1_HUMAN	NCOR1_HUMAN	NCOR1	1.94109	1.39323	0.0303867	-0.102468
sp|P05165|PCCA_HUMAN	PCCA_HUMAN	PCCA	9.5236	3.08603	0.0292468	-0.166143
sp|P42356|PI4KA_HUMAN	PI4KA_HUMAN	PI4KA	1.43279	1.19699	0.0283741	-0.0645316
sp|Q9BXB4|OSB11_HUMAN	OSB11_HUMAN	OSBPL11	1.20835	1.09925	0.0280523	0.0663171
sp|P62847|RS24_HUMAN	RS24_HUMAN	RPS24	2.92386	1.70993	0.0274267	0.052495
sp|O15294|OGT1_HUMAN	OGT1_HUMAN	OGT	7.97203	2.82348	0.0272266	0.0842715
sp|Q7L7X3|TAOK1_HUMAN	TAOK1_HUMAN	TAOK1	0	0	0.0256663	0.0517038
sp|P36578|RL4_HUMAN	RL4_HUMAN	RPL4	1.40399	1.1849	0.0252409	-0.0861128
sp|P62979|RS27A_HUMAN;sp|P0CG47|UBB_HUMAN;sp|P0CG48|UBC_HUMAN	RS27A_HUMAN	RPS27A	4.49756	2.12074	0.0251236	0.027098
sp|Q9NZJ5|E2AK3_HUMAN	E2AK3_HUMAN	#N/A	#N/A	#N/A	0.0230649	-0.0651538
sp|O00410|IPO5_HUMAN	IPO5_HUMAN	#N/A	#N/A	#N/A	0.0227807	0.0698353
sp|P46776|RL27A_HUMAN	RL27A_HUMAN	RPL27A	3.33857	1.82718	0.0218318	0.0348038
sp|O15126|SCAM1_HUMAN	SCAM1_HUMAN	SCAMP1	1.7482	1.3222	0.021687	0.0712275
sp|Q9BZI7|REN3B_HUMAN	REN3B_HUMAN	UPF3B	0	0	0.0216191	-0.0690611
sp|Q9UQL6|HDAC5_HUMAN	HDAC5_HUMAN	#N/A	#N/A	#N/A	0.0209448	-0.0539493
sp|Q86UP2|KTN1_HUMAN	KTN1_HUMAN	KTN1	7.45295	2.73001	0.0205536	-0.0527053
sp|P07900|HS90A_HUMAN	HS90A_HUMAN	#N/A	#N/A	#N/A	0.0187587	-0.0845747
sp|P07814|SYEP_HUMAN	SYEP_HUMAN	EPRS	3.72592	1.93027	0.0185189	-0.0813925
sp|O95905|ECD_HUMAN	ECD_HUMAN	#N/A	#N/A	#N/A	0.0180263	0.0525381
sp|Q8NBA8|DTWD2_HUMAN	DTWD2_HUMAN	#N/A	#N/A	#N/A	0.0175624	-0.0439514
sp|P15311|EZRI_HUMAN	EZRI_HUMAN	#N/A	#N/A	#N/A	0.0173819	-0.0546363
sp|Q8TCU4|ALMS1_HUMAN	ALMS1_HUMAN	#N/A	#N/A	#N/A	0.0172413	-0.0827145
sp|Q9Y4P8|WIPI2_HUMAN	WIPI2_HUMAN	WIPI2	0.811411	0.900783	0.0172219	-0.0700517
sp|P30101|PDIA3_HUMAN	PDIA3_HUMAN	PDIA3	0	0	0.0156617	-0.0302767
sp|Q70E73|RAPH1_HUMAN	RAPH1_HUMAN	RAPH1	0.990565	0.995271	0.0149641	-0.055138
sp|Q15311|RBP1_HUMAN	RBP1_HUMAN	RALBP1	0	0	0.0144153	0.0575613
sp|Q6ZUT1|CK057_HUMAN	CK057_HUMAN	#N/A	#N/A	#N/A	0.0143052	0.0419549
sp|P61026|RAB10_HUMAN	RAB10_HUMAN	RAB10	2.32121	1.52355	0.0140632	0.0693082
sp|Q9HD67|MYO10_HUMAN	MYO10_HUMAN	MYO10	5.18422	2.27689	0.0140325	0.0516968
sp|Q13263|TIF1B_HUMAN	TIF1B_HUMAN	TRIM28	14.5852	3.81906	0.0126346	-0.0364603
sp|O75190|DNJB6_HUMAN	DNJB6_HUMAN	#N/A	#N/A	#N/A	0.0123575	-0.0353465
sp|Q32MZ4|LRRF1_HUMAN	LRRF1_HUMAN	LRRFIP1	0	0	0.0118952	-0.0322066
sp|P55060|XPO2_HUMAN	XPO2_HUMAN	CSE1L	0	0	0.0114011	0.0370325
sp|Q13144|EI2BE_HUMAN	EI2BE_HUMAN	#N/A	#N/A	#N/A	0.00970685	-0.0144916
sp|P51957|NEK4_HUMAN	NEK4_HUMAN	NEK4	0	0	0.00931428	-0.016229
sp|Q86YS7|C2CD5_HUMAN	C2CD5_HUMAN	#N/A	#N/A	#N/A	0.00913447	-0.0353146
sp|Q15652|JHD2C_HUMAN	JHD2C_HUMAN	#N/A	#N/A	#N/A	0.00835521	0.0192844
sp|O95793|STAU1_HUMAN	STAU1_HUMAN	STAU1	2.46211	1.56911	0.00823418	0.0215006
sp|P08243|ASNS_HUMAN	ASNS_HUMAN	#N/A	#N/A	#N/A	0.00809956	0.0153831
sp|Q00839|HNRPU_HUMAN	HNRPU_HUMAN	#N/A	#N/A	#N/A	0.00705287	0.0264381
sp|P11940|PABP1_HUMAN	PABP1_HUMAN	PABPC1	1.77711	1.33308	0.00681976	-0.0196331
sp|O94822|LTN1_HUMAN	LTN1_HUMAN	LTN1	4.06388	2.01591	0.00660614	0.0234532
sp|Q96RQ3|MCCA_HUMAN	MCCA_HUMAN	MCCC1	6.03062	2.45573	0.0062775	0.0248017
sp|P14209|CD99_HUMAN	CD99_HUMAN	CD99	0	0	0.00626871	0.0135173
sp|Q8IY17|PLPL6_HUMAN	PLPL6_HUMAN	PNPLA6	3.11606	1.76524	0.00471883	-0.0235476
sp|Q5SY16|NOL9_HUMAN	NOL9_HUMAN	NOL9	0	0	0.00464637	-0.0110428
sp|Q8IVT5|KSR1_HUMAN	KSR1_HUMAN	KSR1	0	0	0.00436113	0.00729537
sp|Q5VWQ0|RSBN1_HUMAN	RSBN1_HUMAN	RSBN1	57.595	7.58914	0.00321188	0.00852797
sp|Q7Z2K8|GRIN1_HUMAN	GRIN1_HUMAN	#N/A	#N/A	#N/A	0.0025186	0.00730309
sp|Q9UEW8|STK39_HUMAN	STK39_HUMAN	STK39	0	0	0.00235015	-0.00378532
sp|Q9Y2G8|DJC16_HUMAN	DJC16_HUMAN	#N/A	#N/A	#N/A	0.00203532	0.0033861
sp|O60841|IF2P_HUMAN	IF2P_HUMAN	#N/A	#N/A	#N/A	0.00174155	0.0071682
sp|Q8IWB9|TEX2_HUMAN	TEX2_HUMAN	TEX2	0.907172	0.952456	0.00108665	-0.00316808
sp|Q9H6S0|YTDC2_HUMAN	YTDC2_HUMAN	YTHDC2	0	0	0.000720419	0.00194605

## Sheet: RhoA SN
Majority protein IDs	Uniprot	Gene NAME	WD score	Root WD score	Log Student's T-test p-value RhoA SN	Student's T-test Difference RhoA SN
sp|P61586|RHOA_HUMAN;sp|P08134|RHOC_HUMAN	RHOA_HUMAN	RHOA	3227.04	56.8071	21.962	13.6035
sp|Q6ZSZ5|ARHGI_HUMAN	ARHGI_HUMAN	ARHGEF18	2108.99	45.9237	21.4997	7.62384
sp|Q12802|AKP13_HUMAN	AKP13_HUMAN	AKAP13	579.47	24.0722	16.8887	10.1322
sp|Q92974|ARHG2_HUMAN	ARHG2_HUMAN	ARHGEF2	457.905	21.3987	13.6074	9.34628
sp|Q9NZN5|ARHGC_HUMAN	ARHGC_HUMAN	ARHGEF12	373.985	19.3387	13.5779	6.63961
sp|Q13017|RHG05_HUMAN	RHG05_HUMAN	ARHGAP5	117.542	10.8417	9.97304	5.48044
sp|Q8IXI2|MIRO1_HUMAN	MIRO1_HUMAN	RHOT1	77.7219	8.816	6.15256	3.58485
sp|O15085|ARHGB_HUMAN	ARHGB_HUMAN	ARHGEF11	319.557	17.8762	6.00489	4.71629
sp|P16435|NCPR_HUMAN	NCPR_HUMAN	POR	58.6773	7.66011	5.03137	5.129
sp|Q9NQC7|CYLD_HUMAN	CYLD_HUMAN	CYLD	96.9539	9.84652	4.64667	4.6274
sp|O15013|ARHGA_HUMAN	ARHGA_HUMAN	ARHGEF10	0	0	4.51168	2.61403
sp|Q15005|SPCS2_HUMAN	SPCS2_HUMAN	SPCS2	1.66734	1.29125	4.43032	3.28401
sp|Q14139|UBE4A_HUMAN	UBE4A_HUMAN	UBE4A	60.115	7.75339	4.33991	4.63381
sp|Q9NRY4|RHG35_HUMAN	RHG35_HUMAN	ARHGAP35	31.9144	5.64929	4.19943	5.50771
sp|A2RRP1|NBAS_HUMAN	NBAS_HUMAN	NBAS	73.6696	8.5831	3.9095	2.68426
sp|O14617|AP3D1_HUMAN	AP3D1_HUMAN	AP3D1	4.01019	2.00255	3.42165	-2.09461
sp|P15260|INGR1_HUMAN	INGR1_HUMAN	IFNGR1	3.65477	1.91175	3.35407	1.89979
sp|Q86Y07|VRK2_HUMAN	VRK2_HUMAN	VRK2	0	0	3.29202	2.19119
sp|O00161|SNP23_HUMAN	SNP23_HUMAN	SNAP23	0	0	3.11141	2.71219
sp|Q86XL3|ANKL2_HUMAN	ANKL2_HUMAN	ANKLE2	23.149	4.81134	3.10057	4.15363
sp|O75147|OBSL1_HUMAN	OBSL1_HUMAN	OBSL1	46.8307	6.84329	3.0579	2.82355
sp|O95210|STBD1_HUMAN	STBD1_HUMAN	STBD1	50.0656	7.0757	3.04126	3.24963
sp|Q9UHB9|SRP68_HUMAN	SRP68_HUMAN	SRP68	19.582	4.42516	3.03659	4.8991
sp|P52306|GDS1_HUMAN	GDS1_HUMAN	RAP1GDS1	67.0415	8.18789	3.03028	7.45801
sp|Q9HBM0|VEZA_HUMAN	VEZA_HUMAN	VEZT	38.5811	6.21137	2.9956	3.99918
sp|Q96L91|EP400_HUMAN	EP400_HUMAN	EP400	0	0	2.99274	1.6099
sp|Q5VV42|CDKAL_HUMAN	CDKAL_HUMAN	CDKAL1	18.0977	4.25414	2.97654	3.93857
sp|Q05823|RN5A_HUMAN	RN5A_HUMAN	RNASEL	15.9531	3.99413	2.83099	2.74507
sp|Q8NFC6|BD1L1_HUMAN	BD1L1_HUMAN	BOD1L1	2.43441	1.56026	2.82824	1.97895
sp|Q9Y385|UB2J1_HUMAN	UB2J1_HUMAN	UBE2J1	10.9249	3.30529	2.75102	3.87778
sp|Q01484|ANK2_HUMAN	ANK2_HUMAN	ANK2	0	0	2.66467	1.74806
sp|Q07960|RHG01_HUMAN	RHG01_HUMAN	ARHGAP1	19.7323	4.44211	2.66299	6.0433
sp|P35240|MERL_HUMAN	MERL_HUMAN	NF2	8.33335	2.88675	2.59014	2.01796
sp|Q8IWX8|CHERP_HUMAN	CHERP_HUMAN	CHERP	15.524	3.94005	2.55759	3.18451
sp|Q8NBA8|DTWD2_HUMAN	DTWD2_HUMAN	DTWD2	0	0	2.52342	2.60389
sp|Q9UQR0|SCML2_HUMAN	SCML2_HUMAN	SCML2	0	0	2.50217	1.62741
sp|Q9Y3P9|RBGP1_HUMAN	RBGP1_HUMAN	RABGAP1	29.9637	5.47391	2.49873	3.29791
sp|P08240|SRPRA_HUMAN	SRPRA_HUMAN	SRPRA	6.50447	2.55039	2.49249	4.19384
sp|Q9NV66|TYW1_HUMAN;sp|Q6NUM6|TYW1B_HUMAN	TYW1_HUMAN	TYW1	15.4627	3.93227	2.47739	1.81019
sp|Q9NZ52|GGA3_HUMAN	GGA3_HUMAN	GGA3	9.83182	3.13557	2.47073	2.98153
sp|Q9BPX3|CND3_HUMAN	CND3_HUMAN	NCAPG	23.9249	4.8913	2.45201	2.16568
sp|O15173|PGRC2_HUMAN	PGRC2_HUMAN	PGRMC2	4.18151	2.04487	2.39049	1.74082
sp|P18085|ARF4_HUMAN	ARF4_HUMAN	ARF4	2.49275	1.57885	2.38709	2.11222
sp|Q9NXR1|NDE1_HUMAN	NDE1_HUMAN	NDE1	0	0	2.38205	4.08304
sp|O95905|ECD_HUMAN	ECD_HUMAN	ECD	102.205	10.1097	2.35351	2.82029
sp|O60566|BUB1B_HUMAN	BUB1B_HUMAN	BUB1B	11.6891	3.41893	2.34946	4.03001
sp|Q15398|DLGP5_HUMAN	DLGP5_HUMAN	DLGAP5	32.0098	5.65772	2.29586	2.66166
sp|P30519|HMOX2_HUMAN	HMOX2_HUMAN	HMOX2	16.8304	4.10248	2.28929	3.49658
sp|Q96EX3|WDR34_HUMAN	WDR34_HUMAN	WDR34	2.13063	1.45967	2.28529	2.29084
sp|Q7Z3T8|ZFY16_HUMAN	ZFY16_HUMAN	ZFYVE16	10.5247	3.24418	2.26101	2.67715
sp|Q9Y394|DHRS7_HUMAN	DHRS7_HUMAN	DHRS7	7.08573	2.6619	2.25271	3.5036
sp|P48067|SC6A9_HUMAN	SC6A9_HUMAN	SLC6A9	0	0	2.24449	2.01442
sp|Q5VT25|MRCKA_HUMAN	MRCKA_HUMAN	CDC42BPA	123.523	11.1141	2.24222	4.13701
sp|Q02487|DSC2_HUMAN	DSC2_HUMAN	DSC2	98.2449	9.91186	2.18332	2.26571
sp|Q5T5U3|RHG21_HUMAN	RHG21_HUMAN	ARHGAP21	21.9528	4.68538	2.18117	2.46286
sp|Q9Y679|AUP1_HUMAN	AUP1_HUMAN	AUP1	18.8927	4.34657	2.10952	3.18729
sp|Q9P0L0|VAPA_HUMAN	VAPA_HUMAN	VAPA	4.6853	2.16455	2.10442	3.59383
sp|Q96D71|REPS1_HUMAN	REPS1_HUMAN	REPS1	25.2437	5.02431	2.07936	1.75604
sp|Q7Z569|BRAP_HUMAN	BRAP_HUMAN	BRAP	9.09948	3.01653	2.04659	2.65405
sp|Q7Z401|MYCPP_HUMAN	MYCPP_HUMAN	DENND4A	0	0	2.02642	1.9229
sp|Q8TD19|NEK9_HUMAN	NEK9_HUMAN	NEK9	37.5073	6.12432	1.99491	2.95265
sp|Q9P227|RHG23_HUMAN	RHG23_HUMAN	ARHGAP23	0	0	1.98928	1.31854
sp|Q96S66|CLCC1_HUMAN	CLCC1_HUMAN	CLCC1	5.17557	2.27499	1.97207	4.20946
sp|Q9UJ14|GGT7_HUMAN	GGT7_HUMAN	GGT7	3.21524	1.79311	1.96431	1.95767
sp|P52655|TF2AA_HUMAN	TF2AA_HUMAN	#N/A	#N/A	#N/A	1.9619	2.16559
sp|Q9Y6I9|TX264_HUMAN	TX264_HUMAN	TEX264	9.34179	3.05643	1.94323	2.97274
sp|Q8TCJ2|STT3B_HUMAN	STT3B_HUMAN	STT3B	1.95695	1.39891	1.93887	2.56986
sp|Q15652|JHD2C_HUMAN	JHD2C_HUMAN	JMJD1C	20.3031	4.50589	1.9378	1.83223
sp|P28340|DPOD1_HUMAN	DPOD1_HUMAN	POLD1	50.7856	7.1264	1.91024	2.19255
sp|Q86U38|NOP9_HUMAN	NOP9_HUMAN	NOP9	15.5253	3.94022	1.90923	1.39752
sp|Q96T58|MINT_HUMAN	MINT_HUMAN	SPEN	41.036	6.40593	1.90702	4.47747
sp|Q8IZJ1|UNC5B_HUMAN	UNC5B_HUMAN	UNC5B	8.07148	2.84103	1.90654	3.63919
sp|Q96EA4|SPDLY_HUMAN	SPDLY_HUMAN	SPDL1	2.68761	1.63939	1.90625	2.29378
sp|P49588|SYAC_HUMAN	SYAC_HUMAN	AARS	42.3751	6.50962	1.90516	2.45662
sp|P53618|COPB_HUMAN	COPB_HUMAN	COPB1	20.7143	4.5513	1.88926	2.12774
sp|P36873|PP1G_HUMAN;sp|P62136|PP1A_HUMAN	PP1G_HUMAN	PPP1CC	0	0	1.86586	1.43283
sp|O14640|DVL1_HUMAN;sp|P54792|DVLP1_HUMAN	DVL1_HUMAN	DVL1	6.45315	2.54031	1.8594	2.81771
sp|O95573|ACSL3_HUMAN	ACSL3_HUMAN	ACSL3	10.4828	3.23772	1.85834	3.56536
sp|O60749|SNX2_HUMAN	SNX2_HUMAN	SNX2	3.6215	1.90303	1.85455	2.48012
sp|Q8TAA9|VANG1_HUMAN	VANG1_HUMAN	VANGL1	10.1333	3.18328	1.84704	2.87312
sp|P49454|CENPF_HUMAN	CENPF_HUMAN	CENPF	111.566	10.5625	1.83019	3.20457
sp|Q9Y266|NUDC_HUMAN	NUDC_HUMAN	NUDC	5.2927	2.30059	1.82108	2.04724
sp|O15027|SC16A_HUMAN	SC16A_HUMAN	SEC16A	5.73727	2.39526	1.81826	3.12936
sp|Q86UK7|ZN598_HUMAN	ZN598_HUMAN	ZNF598	8.08775	2.8439	1.80886	2.90301
sp|Q8NBF6|AVL9_HUMAN	AVL9_HUMAN	AVL9	0	0	1.80099	1.67514
sp|Q86W92|LIPB1_HUMAN	LIPB1_HUMAN	PPFIBP1	27.4641	5.24062	1.78117	2.00379
sp|O75113|N4BP1_HUMAN	N4BP1_HUMAN	N4BP1	13.4786	3.67132	1.77908	3.90933
sp|P43003|EAA1_HUMAN	EAA1_HUMAN	SLC1A3	0	0	1.76823	1.61187
sp|P62304|RUXE_HUMAN	RUXE_HUMAN	SNRPE	0	0	1.75894	1.91289
sp|Q63HN8|RN213_HUMAN	RN213_HUMAN	RNF213	12.5559	3.54343	1.75872	2.78714
sp|Q6NUQ4|TM214_HUMAN	TM214_HUMAN	TMEM214	4.7318	2.17527	1.73286	1.76655
sp|Q96D09|GASP2_HUMAN	GASP2_HUMAN	GPRASP2	7.32185	2.70589	1.71364	2.45841
sp|Q02224|CENPE_HUMAN	CENPE_HUMAN	CENPE	15.6156	3.95166	1.70681	2.18754
sp|Q16513|PKN2_HUMAN	PKN2_HUMAN	PKN2	31.7768	5.63709	1.70525	2.968
sp|Q12830|BPTF_HUMAN	BPTF_HUMAN	BPTF	34.8243	5.90121	1.70158	2.93211
sp|Q9Y295|DRG1_HUMAN	DRG1_HUMAN	DRG1	0	0	1.69674	1.20149
sp|Q13371|PHLP_HUMAN	PHLP_HUMAN	PDCL	5.1934	2.2789	1.68457	3.52062
sp|Q9UNZ5|L10K_HUMAN	L10K_HUMAN	C19orf53	5.55095	2.35605	1.65941	2.01406
sp|Q9UNE7|CHIP_HUMAN	CHIP_HUMAN	STUB1	0	0	1.65731	1.74856
sp|Q9BSD7|NTPCR_HUMAN	NTPCR_HUMAN	NTPCR	9.89312	3.14533	1.65217	2.06672
sp|Q8N5K1|CISD2_HUMAN	CISD2_HUMAN	CISD2	5.08099	2.25411	1.65171	2.99205
sp|Q9UG63|ABCF2_HUMAN	ABCF2_HUMAN	ABCF2	9.25708	3.04254	1.64976	3.23892
sp|Q9NNW5|WDR6_HUMAN	WDR6_HUMAN	WDR6	22.8848	4.78381	1.64694	2.84737
sp|A2VDJ0|T131L_HUMAN	T131L_HUMAN	TMEM131L	0	0	1.61731	1.16951
sp|P35611|ADDA_HUMAN	ADDA_HUMAN	ADD1	13.7541	3.70865	1.61	3.14089
sp|P50991|TCPD_HUMAN	TCPD_HUMAN	CCT4	0	0	1.6094	1.71606
sp|Q8N0U8|VKORL_HUMAN	VKORL_HUMAN	VKORC1L1	0	0	1.59919	1.28277
sp|Q9BTX1|NDC1_HUMAN	NDC1_HUMAN	NDC1	15.1314	3.88992	1.59263	3.77034
sp|Q9HAU0|PKHA5_HUMAN	PKHA5_HUMAN	PLEKHA5	1.74496	1.32097	1.5922	2.11581
sp|A6NKT7|RGPD3_HUMAN	RGPD3_HUMAN	#N/A	#N/A	#N/A	1.58813	2.73561
sp|P46060|RAGP1_HUMAN	RAGP1_HUMAN	RANGAP1	21.2564	4.61047	1.57426	4.24704
sp|Q93045|STMN2_HUMAN	STMN2_HUMAN	STMN2	0	0	1.57103	2.50002
sp|Q13263|TIF1B_HUMAN	TIF1B_HUMAN	TRIM28	15.8274	3.97836	1.56819	2.22694
sp|Q8NG31|KNL1_HUMAN	KNL1_HUMAN	KNL1	33.8256	5.81598	1.53378	3.91522
sp|Q9Y6Y8|S23IP_HUMAN	S23IP_HUMAN	SEC23IP	9.82189	3.13399	1.52625	2.60004
sp|Q5W0B1|RN219_HUMAN	RN219_HUMAN	RNF219	0	0	1.52278	-0.988322
sp|P27708|PYR1_HUMAN	PYR1_HUMAN	CAD	9.06914	3.0115	1.52055	2.86642
sp|Q86T24|KAISO_HUMAN	KAISO_HUMAN	ZBTB33	18.6582	4.31952	1.49757	1.89392
sp|Q9Y3L5|RAP2C_HUMAN	RAP2C_HUMAN	RAP2C	0	0	1.49094	2.40886
sp|Q2NL82|TSR1_HUMAN	TSR1_HUMAN	TSR1	2.61087	1.61582	1.48252	1.34313
sp|Q96QD8|S38A2_HUMAN	S38A2_HUMAN	SLC38A2	22.3254	4.72497	1.48196	3.29865
sp|Q8N511|TM199_HUMAN	TM199_HUMAN	TMEM199	2.54112	1.59409	1.47758	1.90149
sp|O94826|TOM70_HUMAN	TOM70_HUMAN	TOMM70	4.64582	2.15542	1.47273	2.21118
sp|Q9Y5M8|SRPRB_HUMAN	SRPRB_HUMAN	SRPRB	14.1744	3.76489	1.46886	3.42084
sp|O15294|OGT1_HUMAN	OGT1_HUMAN	OGT	52.5981	7.25245	1.45532	2.39465
sp|Q8TEP8|CE192_HUMAN	CE192_HUMAN	CEP192	84.5367	9.19439	1.45287	3.89042
sp|Q15637|SF01_HUMAN	SF01_HUMAN	SF1	0	0	1.44228	1.71045
sp|Q8TCT9|HM13_HUMAN	HM13_HUMAN	HM13	11.082	3.32896	1.43887	2.69543
sp|Q68EM7|RHG17_HUMAN	RHG17_HUMAN	ARHGAP17	0	0	1.4367	0.975374
sp|B2RTY4|MYO9A_HUMAN	MYO9A_HUMAN	MYO9A	38.0386	6.16755	1.43112	2.47863
sp|P62854|RS26_HUMAN;sp|Q5JNZ5|RS26L_HUMAN	RS26_HUMAN	RPS26	2.78213	1.66797	1.42371	1.14711
sp|P52429|DGKE_HUMAN	DGKE_HUMAN	DGKE	2.21781	1.48923	1.42347	1.69771
sp|P49757|NUMB_HUMAN	NUMB_HUMAN	NUMB	4.85292	2.20293	1.42311	2.89567
sp|Q9Y666|S12A7_HUMAN	S12A7_HUMAN	SLC12A7	27.3821	5.23279	1.41391	2.65153
sp|Q8NBF2|NHLC2_HUMAN	NHLC2_HUMAN	NHLRC2	0	0	1.41026	1.0902
sp|Q641Q2|WAC2A_HUMAN;sp|Q9Y4E1|WAC2C_HUMAN	WAC2A_HUMAN	WASHC2A	6.82033	2.61158	1.40363	2.03237
sp|P51530|DNA2_HUMAN	DNA2_HUMAN	DNA2	36.1373	6.01143	1.40271	1.35374
sp|Q5JTV8|TOIP1_HUMAN	TOIP1_HUMAN	TOR1AIP1	4.39775	2.09708	1.39347	2.09648
sp|Q9UGP8|SEC63_HUMAN	SEC63_HUMAN	SEC63	9.05732	3.00954	1.39283	2.99227
sp|Q13190|STX5_HUMAN	STX5_HUMAN	STX5	5.04275	2.24561	1.38594	3.31087
sp|P30048|PRDX3_HUMAN	PRDX3_HUMAN	PRDX3	4.93767	2.22209	1.38328	2.25025
sp|E9PAV3|NACAM_HUMAN;sp|Q13765|NACA_HUMAN	NACAM_HUMAN	NACA	37.0925	6.09036	1.37906	3.14877
sp|O94842|TOX4_HUMAN	TOX4_HUMAN	TOX4	11.6038	3.40643	1.37898	3.28265
sp|Q9H089|LSG1_HUMAN	LSG1_HUMAN	LSG1	9.03096	3.00516	1.37365	1.71836
sp|P45974|UBP5_HUMAN	UBP5_HUMAN	USP5	73.9032	8.59669	1.36823	2.19103
sp|P22102|PUR2_HUMAN	PUR2_HUMAN	GART	21.5861	4.64609	1.36009	2.15102
sp|Q9UKF6|CPSF3_HUMAN	CPSF3_HUMAN	CPSF3	21.2039	4.60477	1.35989	2.89876
sp|Q14160|SCRIB_HUMAN	SCRIB_HUMAN	SCRIB	20.0483	4.47754	1.35481	3.28124
sp|O14964|HGS_HUMAN	HGS_HUMAN	HGS	58.0059	7.61616	1.35445	2.1001
sp|Q9H3N1|TMX1_HUMAN	TMX1_HUMAN	TMX1	6.13609	2.47711	1.35406	3.3889
sp|P23588|IF4B_HUMAN	IF4B_HUMAN	EIF4B	4.01007	2.00252	1.35272	2.493
sp|P62273|RS29_HUMAN	RS29_HUMAN	RPS29	0.968864	0.984309	1.34642	-3.62861
sp|O00400|ACATN_HUMAN	ACATN_HUMAN	SLC33A1	24.953	4.9953	1.34533	2.45794
sp|Q6P995|F171B_HUMAN	F171B_HUMAN	FAM171B	45.3757	6.73615	1.34283	1.92239
sp|P98170|XIAP_HUMAN	XIAP_HUMAN	XIAP	0	0	1.34033	1.61433
sp|Q9Y5A9|YTHD2_HUMAN	YTHD2_HUMAN	YTHDF2	0	0	1.33579	2.0223
sp|Q9Y5K6|CD2AP_HUMAN	CD2AP_HUMAN	CD2AP	4.20777	2.05129	1.33146	3.01558
sp|O14737|PDCD5_HUMAN	PDCD5_HUMAN	PDCD5	1.95055	1.39662	1.32561	1.40731
sp|P54136|SYRC_HUMAN	SYRC_HUMAN	RARS	0	0	1.31091	-1.77229
sp|O43396|TXNL1_HUMAN	TXNL1_HUMAN	TXNL1	5.99441	2.44835	1.29886	2.92583
sp|Q6P2Q9|PRP8_HUMAN	PRP8_HUMAN	PRPF8	13.875	3.72491	1.29883	2.45117
sp|Q9GZR7|DDX24_HUMAN	DDX24_HUMAN	DDX24	6.68028	2.58462	1.27321	3.04548
sp|Q8WVM8|SCFD1_HUMAN	SCFD1_HUMAN	SCFD1	19.2625	4.38891	1.26815	1.49485
sp|P29317|EPHA2_HUMAN	EPHA2_HUMAN	EPHA2	0	0	1.26686	1.1748
sp|Q9NYJ8|TAB2_HUMAN	TAB2_HUMAN	TAB2	10.1365	3.18378	1.26517	1.7128
sp|Q9H1K0|RBNS5_HUMAN	RBNS5_HUMAN	RBSN	2.03686	1.42718	1.26326	1.46205
sp|Q7Z7G8|VP13B_HUMAN	VP13B_HUMAN	VPS13B	19.1489	4.37595	1.2391	2.3932
sp|Q96A33|CCD47_HUMAN	CCD47_HUMAN	CCDC47	5.03251	2.24333	1.23846	2.68872
sp|Q9BVC6|TM109_HUMAN	TM109_HUMAN	TMEM109	0	0	1.23739	1.72517
sp|P51809|VAMP7_HUMAN	VAMP7_HUMAN	VAMP7	0	0	1.23475	1.42652
sp|O60762|DPM1_HUMAN	DPM1_HUMAN	DPM1	0	0	1.23396	1.88698
sp|Q9P0K7|RAI14_HUMAN	RAI14_HUMAN	RAI14	5.36925	2.31716	1.23098	3.03628
sp|Q9P2J5|SYLC_HUMAN	SYLC_HUMAN	LARS	49.0433	7.00309	1.22642	2.08501
sp|P55072|TERA_HUMAN	TERA_HUMAN	VCP	62.8207	7.92595	1.22244	1.94718
sp|Q16543|CDC37_HUMAN	CDC37_HUMAN	CDC37	22.7292	4.76752	1.22189	1.71677
sp|P51648|AL3A2_HUMAN	AL3A2_HUMAN	ALDH3A2	5.08264	2.25447	1.21932	0.812234
sp|P41440|S19A1_HUMAN	S19A1_HUMAN	SLC19A1	17.3379	4.16388	1.217	2.64052
sp|O15063|K0355_HUMAN	K0355_HUMAN	KIAA0355	0	0	1.21601	4.6077
sp|Q9ULK5|VANG2_HUMAN	VANG2_HUMAN	VANGL2	25.1682	5.0168	1.21566	1.66767
sp|Q9Y2H6|FND3A_HUMAN	FND3A_HUMAN	FNDC3A	5.56831	2.35973	1.21043	3.10229
sp|Q6ZNB6|NFXL1_HUMAN	NFXL1_HUMAN	NFXL1	11.3632	3.37094	1.21024	1.63764
sp|O95478|NSA2_HUMAN	NSA2_HUMAN	NSA2	2.46163	1.56896	1.2078	1.77237
sp|O75410|TACC1_HUMAN	TACC1_HUMAN	TACC1	5.81367	2.41115	1.20198	3.53654
sp|Q9Y2U8|MAN1_HUMAN	MAN1_HUMAN	LEMD3	6.79371	2.60647	1.19901	2.60108
sp|Q13480|GAB1_HUMAN	GAB1_HUMAN	GAB1	0	0	1.19684	1.15739
sp|O14744|ANM5_HUMAN	ANM5_HUMAN	#N/A	#N/A	#N/A	1.18534	-0.823596
sp|Q9NV70|EXOC1_HUMAN	EXOC1_HUMAN	EXOC1	2.42783	1.55815	1.18411	1.89566
sp|Q13586|STIM1_HUMAN	STIM1_HUMAN	STIM1	7.62548	2.76143	1.18191	2.91458
sp|Q86UE4|LYRIC_HUMAN	LYRIC_HUMAN	MTDH	4.24024	2.05918	1.17968	2.46011
sp|Q9UHD8|SEPT9_HUMAN	SEPT9_HUMAN	SEPTIN9	1.73016	1.31535	1.17387	1.47518
sp|Q9BPX6|MICU1_HUMAN	MICU1_HUMAN	MICU1	5.052	2.24767	1.17243	1.79515
sp|Q9HDC5|JPH1_HUMAN	JPH1_HUMAN	JPH1	4.97362	2.23016	1.17172	1.81973
sp|P49792|RBP2_HUMAN	RBP2_HUMAN	RANBP2	13.5281	3.67806	1.16591	3.81594
sp|Q9NXE4|NSMA3_HUMAN	NSMA3_HUMAN	SMPD4	49.6684	7.04758	1.16559	1.37264
sp|P84157|MXRA7_HUMAN	MXRA7_HUMAN	MXRA7	0	0	1.16336	1.77191
sp|Q9H6Z4|RANB3_HUMAN	RANB3_HUMAN	RANBP3	13.3415	3.65261	1.1605	2.09295
sp|Q9BQA1|MEP50_HUMAN	MEP50_HUMAN	WDR77	10.2052	3.19456	1.16038	1.79967
sp|Q04721|NOTC2_HUMAN	NOTC2_HUMAN	NOTCH2	5.14734	2.26877	1.15965	2.54414
sp|P29597|TYK2_HUMAN	TYK2_HUMAN	TYK2	11.6765	3.41708	1.15547	2.75017
sp|Q8IWC1|MA7D3_HUMAN	MA7D3_HUMAN	MAP7D3	5.71299	2.39019	1.15265	2.58328
sp|Q7L7X3|TAOK1_HUMAN	TAOK1_HUMAN	TAOK1	0	0	1.15119	1.31318
sp|P52732|KIF11_HUMAN	KIF11_HUMAN	KIF11	17.9227	4.23352	1.14951	2.15199
sp|Q9Y2I1|NISCH_HUMAN	NISCH_HUMAN	NISCH	14.5216	3.81072	1.1452	2.36869
sp|Q9H9A6|LRC40_HUMAN	LRC40_HUMAN	LRRC40	52.8803	7.27188	1.14241	1.1521
sp|O00571|DDX3X_HUMAN;sp|O15523|DDX3Y_HUMAN	DDX3X_HUMAN	DDX3X	3.89757	1.97423	1.14155	2.67943
sp|Q9BQG0|MBB1A_HUMAN	MBB1A_HUMAN	MYBBP1A	7.42649	2.72516	1.13775	-1.12332
sp|Q99615|DNJC7_HUMAN	DNJC7_HUMAN	DNAJC7	19.6245	4.42995	1.1311	2.30952
sp|Q9UIQ6|LCAP_HUMAN	LCAP_HUMAN	LNPEP	15.9007	3.98757	1.12919	1.95754
sp|P82094|TMF1_HUMAN	TMF1_HUMAN	TMF1	4.73552	2.17613	1.12078	2.38681
sp|O60841|IF2P_HUMAN	IF2P_HUMAN	EIF5B	2.13377	1.46074	1.11253	-2.42026
sp|Q14980|NUMA1_HUMAN	NUMA1_HUMAN	NUMA1	8.02058	2.83206	1.1073	3.06551
sp|O95292|VAPB_HUMAN	VAPB_HUMAN	VAPB	4.06507	2.0162	1.1044	2.03705
sp|Q53EZ4|CEP55_HUMAN	CEP55_HUMAN	CEP55	1.81656	1.3478	1.10055	1.31952
sp|Q8WXH0|SYNE2_HUMAN	SYNE2_HUMAN	SYNE2	13.3843	3.65845	1.09932	3.94444
sp|P48029|SC6A8_HUMAN	SC6A8_HUMAN	SLC6A8	8.10327	2.84663	1.09767	1.9118
sp|Q6Y7W6|GGYF2_HUMAN	GGYF2_HUMAN	GIGYF2	4.06778	2.01687	1.09648	-2.37425
sp|Q9UHI8|ATS1_HUMAN	ATS1_HUMAN	ADAMTS1	1.54315	1.24223	1.09324	1.29935
sp|P17812|PYRG1_HUMAN	PYRG1_HUMAN	CTPS1	4.10927	2.02713	1.08894	2.66495
sp|Q9NTK5|OLA1_HUMAN	OLA1_HUMAN	OLA1	0	0	1.08693	-1.07033
sp|O60502|OGA_HUMAN	OGA_HUMAN	OGA	17.3875	4.16983	1.08618	1.58268
sp|P51587|BRCA2_HUMAN	BRCA2_HUMAN	BRCA2	2.69401	1.64134	1.08491	1.67196
sp|P48444|COPD_HUMAN	COPD_HUMAN	ARCN1	1.83116	1.3532	1.08317	2.2016
sp|Q9H3P7|GCP60_HUMAN	GCP60_HUMAN	ACBD3	4.51231	2.12422	1.08018	2.65496
sp|P29966|MARCS_HUMAN	MARCS_HUMAN	MARCKS	4.55475	2.13419	1.07446	2.0155
sp|Q15738|NSDHL_HUMAN	NSDHL_HUMAN	NSDHL	3.37337	1.83667	1.07306	2.26352
sp|P18564|ITB6_HUMAN	ITB6_HUMAN	ITGB6	0	0	1.07106	2.31472
sp|Q66PJ3|AR6P4_HUMAN	AR6P4_HUMAN	ARL6IP4	7.29491	2.70091	1.0677	2.47994
sp|P46821|MAP1B_HUMAN	MAP1B_HUMAN	MAP1B	8.03139	2.83397	1.06708	3.50174
sp|P49257|LMAN1_HUMAN	LMAN1_HUMAN	LMAN1	24.0331	4.90236	1.06379	3.21157
sp|P16949|STMN1_HUMAN	STMN1_HUMAN	STMN1	3.18695	1.7852	1.06258	1.97103
sp|Q5JRA6|MIA3_HUMAN	MIA3_HUMAN	MIA3	6.85762	2.61871	1.06088	2.58316
sp|P27635|RL10_HUMAN	RL10_HUMAN	RPL10	4.37153	2.09082	1.05912	0.802692
sp|Q9UPU7|TBD2B_HUMAN	TBD2B_HUMAN	TBC1D2B	12.0411	3.47003	1.05835	1.63987
sp|P55036|PSMD4_HUMAN	PSMD4_HUMAN	PSMD4	35.1689	5.93034	1.05257	2.9824
sp|Q96G28|CFA36_HUMAN	CFA36_HUMAN	CFAP36	193.334	13.9045	1.04898	0.868696
sp|Q9Y2G8|DJC16_HUMAN	DJC16_HUMAN	DNAJC16	2.42246	1.55643	1.04784	1.024
sp|Q96BY7|ATG2B_HUMAN	ATG2B_HUMAN	ATG2B	7.74805	2.78353	1.04517	3.00513
sp|Q02040|AK17A_HUMAN	AK17A_HUMAN	AKAP17A	5.82494	2.41349	1.04172	2.72685
sp|P50402|EMD_HUMAN	EMD_HUMAN	EMD	3.1709	1.7807	1.03935	1.88571
sp|Q5VU97|CAHD1_HUMAN	CAHD1_HUMAN	CACHD1	4.81633	2.19461	1.03913	1.08666
sp|P07737|PROF1_HUMAN	PROF1_HUMAN	PFN1	4.28969	2.07116	1.03736	2.24347
sp|P30101|PDIA3_HUMAN	PDIA3_HUMAN	PDIA3	0	0	1.03487	-0.989745
sp|Q8NC51|PAIRB_HUMAN	PAIRB_HUMAN	SERBP1	5.00479	2.23714	1.02492	2.46715
sp|P55010|IF5_HUMAN	IF5_HUMAN	EIF5	4.47549	2.11554	1.02396	2.20794
sp|P53367|ARFP1_HUMAN	ARFP1_HUMAN	ARFIP1	2.21723	1.48904	1.0216	1.56063
sp|P46778|RL21_HUMAN	RL21_HUMAN	RPL21	8.96207	2.99367	1.01673	2.17796
sp|Q9H5V9|CX056_HUMAN	CX056_HUMAN	CXorf56	7.25829	2.69412	1.01503	2.46194
sp|P24928|RPB1_HUMAN	RPB1_HUMAN	POLR2A	5.86023	2.42079	1.01268	2.78632
sp|P37198|NUP62_HUMAN	NUP62_HUMAN	#N/A	#N/A	#N/A	1.01212	-0.869782
sp|Q99567|NUP88_HUMAN	NUP88_HUMAN	NUP88	0	0	1.01042	1.25322
sp|P56192|SYMC_HUMAN	SYMC_HUMAN	MARS	4.13409	2.03325	1.00782	1.54955
sp|Q9C0B7|TNG6_HUMAN	TNG6_HUMAN	TANGO6	38.7217	6.22267	1.00766	1.66671
sp|Q8TCU4|ALMS1_HUMAN	ALMS1_HUMAN	ALMS1	10.1015	3.17829	1.00518	2.63233
sp|Q15233|NONO_HUMAN	NONO_HUMAN	NONO	8.60607	2.93361	0.997501	2.42784
sp|O95817|BAG3_HUMAN	BAG3_HUMAN	BAG3	41.2787	6.42485	0.995534	1.08287
sp|Q13596|SNX1_HUMAN	SNX1_HUMAN	SNX1	4.5335	2.1292	0.990512	2.37969
sp|Q9Y5V3|MAGD1_HUMAN	MAGD1_HUMAN	MAGED1	25.7608	5.07551	0.987655	1.23164
sp|P57772|SELB_HUMAN	SELB_HUMAN	EEFSEC	12.7204	3.56657	0.987339	2.34407
sp|P15924|DESP_HUMAN	DESP_HUMAN	DSP	14.1864	3.76648	0.98616	2.78851
sp|P53597|SUCA_HUMAN	SUCA_HUMAN	SUCLG1	0	0	0.985999	1.31648
sp|O96011|PX11B_HUMAN	PX11B_HUMAN	PEX11B	3.64865	1.91014	0.979668	1.92634
sp|O60763|USO1_HUMAN	USO1_HUMAN	USO1	2.19715	1.48228	0.974576	1.3548
sp|Q9NQV6|PRD10_HUMAN	PRD10_HUMAN	PRDM10	0	0	0.97393	0.912327
sp|Q5T160|SYRM_HUMAN	SYRM_HUMAN	#N/A	#N/A	#N/A	0.972153	-0.926662
sp|Q8WVS4|WDR60_HUMAN	WDR60_HUMAN	WDR60	4.80487	2.192	0.971534	2.42456
sp|P42167|LAP2B_HUMAN	LAP2B_HUMAN	TMPO	5.22164	2.28509	0.97042	1.25043
sp|Q13439|GOGA4_HUMAN	GOGA4_HUMAN	GOLGA4	12.9536	3.59912	0.965677	3.68158
sp|P27348|1433T_HUMAN	1433T_HUMAN	YWHAQ	59.8501	7.73629	0.965183	1.00097
sp|P11021|GRP78_HUMAN	GRP78_HUMAN	HSPA5	14.0294	3.74559	0.964556	2.33638
sp|Q92667|AKAP1_HUMAN	AKAP1_HUMAN	AKAP1	9.24741	3.04096	0.964253	-1.10914
sp|Q12797|ASPH_HUMAN	ASPH_HUMAN	ASPH	0	0	0.963736	1.3407
sp|P46939|UTRO_HUMAN	UTRO_HUMAN	UTRN	9.4825	3.07937	0.961683	3.33925
sp|Q99614|TTC1_HUMAN	TTC1_HUMAN	TTC1	36.3149	6.02619	0.961453	1.91528
sp|O75794|CD123_HUMAN	CD123_HUMAN	#N/A	#N/A	#N/A	0.954222	-1.04589
sp|Q9NQC3|RTN4_HUMAN	RTN4_HUMAN	RTN4	9.4044	3.06666	0.953162	2.68032
sp|Q9Y6M5|ZNT1_HUMAN	ZNT1_HUMAN	SLC30A1	2.82972	1.68218	0.944866	1.41719
sp|Q9C0C4|SEM4C_HUMAN	SEM4C_HUMAN	SEMA4C	4.85901	2.20432	0.944539	1.86543
sp|O00567|NOP56_HUMAN	NOP56_HUMAN	NOP56	7.24802	2.69222	0.94285	2.66775
sp|P62820|RAB1A_HUMAN	RAB1A_HUMAN	RAB1A	4.30373	2.07454	0.934176	1.75328
sp|Q14137|BOP1_HUMAN	BOP1_HUMAN	BOP1	5.18695	2.27749	0.931964	2.10342
sp|P55209|NP1L1_HUMAN	NP1L1_HUMAN	NAP1L1	53.6851	7.32701	0.929563	1.99654
sp|Q9HCU5|PREB_HUMAN	PREB_HUMAN	PREB	4.07369	2.01834	0.929519	1.92365
sp|P62277|RS13_HUMAN	RS13_HUMAN	RPS13	0.653454	0.808365	0.92864	-2.1658
sp|P35606|COPB2_HUMAN	COPB2_HUMAN	COPB2	0	0	0.926826	1.12341
sp|P04181|OAT_HUMAN	OAT_HUMAN	OAT	4.62859	2.15142	0.921011	1.07578
sp|O94806|KPCD3_HUMAN	KPCD3_HUMAN	PRKD3	1.73585	1.31752	0.920427	0.925811
sp|P29320|EPHA3_HUMAN	EPHA3_HUMAN	EPHA3	0	0	0.918874	1.27305
sp|P62937|PPIA_HUMAN	PPIA_HUMAN	PPIA	3.69158	1.92135	0.916899	1.81993
sp|Q9H6T3|RPAP3_HUMAN	RPAP3_HUMAN	RPAP3	7.16507	2.67676	0.914831	2.25683
sp|Q9BW92|SYTM_HUMAN	SYTM_HUMAN	TARS2	1.57642	1.25556	0.913138	1.74191
sp|P43307|SSRA_HUMAN	SSRA_HUMAN	SSR1	2.77451	1.66569	0.905391	2.40401
sp|O14980|XPO1_HUMAN	XPO1_HUMAN	XPO1	4.75296	2.18013	0.905172	1.61703
sp|Q7KZF4|SND1_HUMAN	SND1_HUMAN	SND1	5.6048	2.36745	0.903234	2.37193
sp|Q5HYI8|RABL3_HUMAN	RABL3_HUMAN	RABL3	1.95611	1.39861	0.902726	2.25111
sp|Q9Y4E8|UBP15_HUMAN	UBP15_HUMAN	USP15	5.45076	2.33469	0.902666	2.74245
sp|Q05655|KPCD_HUMAN	KPCD_HUMAN	PRKCD	2.4132	1.55345	0.901337	1.47804
sp|O60488|ACSL4_HUMAN	ACSL4_HUMAN	ACSL4	2.01393	1.41913	0.898884	1.46547
sp|O95831|AIFM1_HUMAN	AIFM1_HUMAN	AIFM1	5.11679	2.26203	0.898711	1.56304
sp|Q99733|NP1L4_HUMAN	NP1L4_HUMAN	NAP1L4	50.8306	7.12956	0.898066	1.75695
sp|Q9HCK8|CHD8_HUMAN	CHD8_HUMAN	CHD8	13.2675	3.64245	0.896628	3.34596
sp|Q8NEN9|PDZD8_HUMAN	PDZD8_HUMAN	PDZD8	9.00597	3.001	0.895948	2.48717
sp|Q8NBN3|TM87A_HUMAN	TM87A_HUMAN	TMEM87A	8.15845	2.8563	0.894946	2.34234
sp|Q68DQ2|CRBG3_HUMAN	CRBG3_HUMAN	CRYBG3	13.7832	3.71257	0.89489	2.97678
sp|P62258|1433E_HUMAN	1433E_HUMAN	YWHAE	0	0	0.891955	1.58724
sp|P05141|ADT2_HUMAN	ADT2_HUMAN	SLC25A5	6.06972	2.46368	0.890603	0.840206
sp|Q8N3C0|ASCC3_HUMAN	ASCC3_HUMAN	ASCC3	24.8509	4.98507	0.890205	2.21397
sp|P14209|CD99_HUMAN	CD99_HUMAN	CD99	0	0	0.886023	1.07082
sp|P33176|KINH_HUMAN	KINH_HUMAN	KIF5B	11.8866	3.44769	0.885593	2.06972
sp|P08195|4F2_HUMAN	4F2_HUMAN	SLC3A2	7.58378	2.75387	0.882364	1.07727
sp|P05556|ITB1_HUMAN	ITB1_HUMAN	ITGB1	4.99674	2.23534	0.880335	2.43649
sp|P23458|JAK1_HUMAN	JAK1_HUMAN	JAK1	12.7284	3.56769	0.878214	1.86952
sp|Q05682|CALD1_HUMAN	CALD1_HUMAN	CALD1	4.31155	2.07643	0.873613	2.12179
sp|Q9UQL6|HDAC5_HUMAN	HDAC5_HUMAN	HDAC5	13.3287	3.65085	0.873074	1.43345
sp|Q15643|TRIPB_HUMAN	TRIPB_HUMAN	TRIP11	9.74159	3.12115	0.87204	2.90474
sp|Q15056|IF4H_HUMAN	IF4H_HUMAN	EIF4H	4.46119	2.11215	0.870222	1.96784
sp|P11142|HSP7C_HUMAN	HSP7C_HUMAN	HSPA8	6.63381	2.57562	0.869604	1.89698
sp|P19338|NUCL_HUMAN	NUCL_HUMAN	NCL	4.45616	2.11096	0.865391	2.33843
sp|Q08379|GOGA2_HUMAN	GOGA2_HUMAN	GOLGA2	7.69852	2.77462	0.865252	1.91637
sp|Q6PIW4|FIGL1_HUMAN;sp|Q9UN37|VPS4A_HUMAN;sp|O75351|VPS4B_HUMAN	FIGL1_HUMAN	FIGNL1	0	0	0.860483	0.754534
sp|Q86YS7|C2CD5_HUMAN	C2CD5_HUMAN	C2CD5	5.45069	2.33467	0.858992	1.99205
sp|Q99961|SH3G1_HUMAN	SH3G1_HUMAN	SH3GL1	1.44684	1.20285	0.85731	1.52084
sp|P62861|RS30_HUMAN	RS30_HUMAN	FAU	2.55776	1.5993	0.857163	1.01869
sp|P04049|RAF1_HUMAN	RAF1_HUMAN	RAF1	0	0	0.854464	0.980627
sp|Q9UHK0|NUFP1_HUMAN	NUFP1_HUMAN	NUFIP1	4.02647	2.00661	0.852824	1.15191
sp|P50851|LRBA_HUMAN	LRBA_HUMAN	LRBA	8.92854	2.98807	0.848005	2.76122
sp|Q96RL7|VP13A_HUMAN	VP13A_HUMAN	VPS13A	8.01081	2.83034	0.846727	2.64082
sp|P30876|RPB2_HUMAN	RPB2_HUMAN	POLR2B	16.0965	4.01205	0.840248	2.292
sp|Q3ZCM7|TBB8_HUMAN	TBB8_HUMAN	#N/A	#N/A	#N/A	0.839901	1.7858
sp|Q6UB35|C1TM_HUMAN	C1TM_HUMAN	MTHFD1L	20.6908	4.54872	0.839215	1.6401
sp|Q9Y520|PRC2C_HUMAN	PRC2C_HUMAN	PRRC2C	9.22434	3.03716	0.838282	2.9697
sp|P43487|RANG_HUMAN	RANG_HUMAN	RANBP1	11.8509	3.44251	0.835307	2.42844
sp|P11586|C1TC_HUMAN	C1TC_HUMAN	MTHFD1	5.22017	2.28477	0.833599	2.24565
sp|Q9NVP1|DDX18_HUMAN	DDX18_HUMAN	DDX18	11.3591	3.37033	0.832708	2.48461
sp|Q9BXS9|S26A6_HUMAN	S26A6_HUMAN	SLC26A6	1.44605	1.20252	0.829253	1.47258
sp|Q9H2H9|S38A1_HUMAN	S38A1_HUMAN	SLC38A1	6.04481	2.45862	0.828135	2.56218
sp|Q9UNF1|MAGD2_HUMAN	MAGD2_HUMAN	MAGED2	6.13537	2.47697	0.827608	1.76577
sp|Q8N5G2|MACOI_HUMAN	MACOI_HUMAN	MACO1	12.5341	3.54035	0.827288	1.70216
sp|Q86YS6|RAB43_HUMAN	RAB43_HUMAN	RAB43	5.36513	2.31628	0.826135	1.80436
sp|Q9NX61|T161A_HUMAN	T161A_HUMAN	#N/A	#N/A	#N/A	0.814225	-0.708723
sp|P62829|RL23_HUMAN	RL23_HUMAN	RPL23	4.94976	2.2248	0.813877	0.741517
sp|Q96MW1|CCD43_HUMAN	CCD43_HUMAN	CCDC43	4.96998	2.22935	0.813491	1.93227
sp|Q6WKZ4|RFIP1_HUMAN	RFIP1_HUMAN	RAB11FIP1	5.15837	2.2712	0.810232	1.99293
sp|Q9Y678|COPG1_HUMAN	COPG1_HUMAN	COPG1	46.7785	6.83948	0.807103	1.33249
sp|Q9UBF2|COPG2_HUMAN	COPG2_HUMAN	COPG2	5.08294	2.25454	0.806391	2.00623
sp|P78318|IGBP1_HUMAN	IGBP1_HUMAN	IGBP1	0	0	0.805228	1.05177
sp|Q7Z4H7|HAUS6_HUMAN	HAUS6_HUMAN	HAUS6	6.21549	2.49309	0.802718	2.94869
sp|Q9UI10|EI2BD_HUMAN	EI2BD_HUMAN	EIF2B4	0	0	0.801746	-1.2503
sp|Q8TAT6|NPL4_HUMAN	NPL4_HUMAN	NPLOC4	32.9491	5.74013	0.801594	1.94693
sp|Q5SW79|CE170_HUMAN	CE170_HUMAN	CEP170	4.92294	2.21877	0.799973	2.68356
sp|P51617|IRAK1_HUMAN	IRAK1_HUMAN	IRAK1	5.17785	2.27549	0.798954	1.77207
sp|P0DMV9|HS71B_HUMAN;sp|P0DMV8|HS71A_HUMAN	HS71B_HUMAN	HSPA1B	0	0	0.79655	1.28735
sp|Q8TBA6|GOGA5_HUMAN	GOGA5_HUMAN	GOLGA5	5.04505	2.24612	0.795897	2.29614
sp|Q01650|LAT1_HUMAN	LAT1_HUMAN	SLC7A5	4.83865	2.19969	0.795542	2.04485
sp|Q08378|GOGA3_HUMAN	GOGA3_HUMAN	GOLGA3	11.9751	3.46051	0.795017	1.53338
sp|Q6P4R8|NFRKB_HUMAN	NFRKB_HUMAN	NFRKB	3.68039	1.91843	0.794749	1.17842
sp|Q86UB9|TM135_HUMAN	TM135_HUMAN	TMEM135	0	0	0.790061	-1.59411
sp|Q14739|LBR_HUMAN	LBR_HUMAN	LBR	7.12919	2.67005	0.788313	1.64905
sp|P47914|RL29_HUMAN	RL29_HUMAN	RPL29	2.05576	1.43379	0.787011	0.989908
sp|Q8IUD2|RB6I2_HUMAN	RB6I2_HUMAN	ERC1	5.64635	2.3762	0.782131	2.3004
sp|P38646|GRP75_HUMAN	GRP75_HUMAN	HSPA9	15.0457	3.87888	0.778826	2.21115
sp|Q8NF91|SYNE1_HUMAN	SYNE1_HUMAN	SYNE1	6.36454	2.5228	0.777914	2.17845
sp|Q14839|CHD4_HUMAN	CHD4_HUMAN	CHD4	4.97142	2.22967	0.773282	2.29942
sp|Q96C19|EFHD2_HUMAN	EFHD2_HUMAN	EFHD2	3.66505	1.91443	0.773013	1.81808
sp|P15311|EZRI_HUMAN	EZRI_HUMAN	EZR	3.17538	1.78196	0.772022	1.59861
sp|Q9C0C9|UBE2O_HUMAN	UBE2O_HUMAN	UBE2O	0	0	0.770932	1.53598
sp|Q6R327|RICTR_HUMAN	RICTR_HUMAN	RICTOR	2.06709	1.43774	0.768725	1.2097
sp|P30837|AL1B1_HUMAN	AL1B1_HUMAN	ALDH1B1	43.8593	6.62264	0.767727	0.832511
sp|P46108|CRK_HUMAN	CRK_HUMAN	CRK	3.55381	1.88516	0.765087	1.24986
sp|Q9UEY8|ADDG_HUMAN	ADDG_HUMAN	ADD3	10.0407	3.1687	0.762782	1.67085
sp|Q96KC8|DNJC1_HUMAN	DNJC1_HUMAN	DNAJC1	0	0	0.761834	1.10675
sp|Q9BZF3|OSBL6_HUMAN	OSBL6_HUMAN	OSBPL6	4.07304	2.01818	0.758428	1.94408
sp|P23381|SYWC_HUMAN	SYWC_HUMAN	WARS	1.852	1.36088	0.758067	1.22128
sp|O75534|CSDE1_HUMAN	CSDE1_HUMAN	CSDE1	5.36633	2.31653	0.757718	2.40696
sp|O96013|PAK4_HUMAN	PAK4_HUMAN	PAK4	0	0	0.75708	0.793974
sp|Q02952|AKA12_HUMAN	AKA12_HUMAN	AKAP12	4.76608	2.18313	0.756976	2.38701
sp|P49327|FAS_HUMAN	FAS_HUMAN	FASN	13.9567	3.73587	0.756926	1.01831
sp|O00541|PESC_HUMAN	PESC_HUMAN	PES1	6.79315	2.60637	0.755626	1.74245
sp|Q6PCB5|RSBNL_HUMAN	RSBNL_HUMAN	RSBN1L	8.67307	2.94501	0.752583	1.71735
sp|O60645|EXOC3_HUMAN	EXOC3_HUMAN	EXOC3	0	0	0.752311	-1.20577
sp|P60468|SC61B_HUMAN	SC61B_HUMAN	SEC61B	0.925693	0.96213	0.749549	-1.84191
sp|Q9ULH0|KDIS_HUMAN	KDIS_HUMAN	KIDINS220	3.54006	1.8815	0.749535	-0.790551
sp|Q14728|MFS10_HUMAN	MFS10_HUMAN	#N/A	#N/A	#N/A	0.745557	-0.846748
sp|P51610|HCFC1_HUMAN	HCFC1_HUMAN	HCFC1	6.46428	2.54249	0.74431	2.36135
sp|Q9Y2I7|FYV1_HUMAN	FYV1_HUMAN	PIKFYVE	0	0	0.740111	1.16117
sp|Q9ULM3|YETS2_HUMAN	YETS2_HUMAN	YEATS2	7.22975	2.68882	0.738818	2.07304
sp|Q8N0X7|SPG20_HUMAN	SPG20_HUMAN	SPART	4.28677	2.07045	0.738602	1.75203
sp|O43290|SNUT1_HUMAN	SNUT1_HUMAN	SART1	8.03806	2.83515	0.738427	1.83814
sp|P53621|COPA_HUMAN	COPA_HUMAN	COPA	4.87085	2.207	0.737929	1.3763
sp|P17066|HSP76_HUMAN	HSP76_HUMAN	HSPA6	0	0	0.735301	1.24769
sp|Q9H0A0|NAT10_HUMAN	NAT10_HUMAN	NAT10	5.17661	2.27522	0.734185	2.08459
sp|Q9UBB6|NCDN_HUMAN	NCDN_HUMAN	NCDN	7.00323	2.64636	0.728499	0.577888
sp|Q13459|MYO9B_HUMAN	MYO9B_HUMAN	MYO9B	6.04613	2.45889	0.726934	2.114
sp|P46782|RS5_HUMAN	RS5_HUMAN	RPS5	4.21053	2.05196	0.725383	1.87176
sp|Q92692|NECT2_HUMAN	NECT2_HUMAN	NECTIN2	14.5797	3.81834	0.723254	1.04147
sp|O75376|NCOR1_HUMAN	NCOR1_HUMAN	NCOR1	72.6117	8.52125	0.721763	1.70415
sp|Q02413|DSG1_HUMAN	DSG1_HUMAN	DSG1	5.40233	2.32429	0.717828	1.08592
sp|P49321|NASP_HUMAN	NASP_HUMAN	NASP	8.52486	2.91974	0.716079	1.96771
sp|Q9Y6K0|CEPT1_HUMAN	CEPT1_HUMAN	CEPT1	0	0	0.715697	1.21555
sp|P60891|PRPS1_HUMAN;sp|P21108|PRPS3_HUMAN;sp|P11908|PRPS2_HUMAN	PRPS1_HUMAN	PRPS1	0	0	0.714439	1.2588
sp|P07305|H10_HUMAN	H10_HUMAN	H1F0	9.04004	3.00667	0.713827	2.04776
sp|P32119|PRDX2_HUMAN	PRDX2_HUMAN	PRDX2	0	0	0.712751	0.788069
sp|Q5JTW2|CEP78_HUMAN	CEP78_HUMAN	CEP78	5.82538	2.41358	0.710025	2.00588
sp|Q99996|AKAP9_HUMAN	AKAP9_HUMAN	AKAP9	18.0146	4.24437	0.709401	2.55243
sp|Q9BXW9|FACD2_HUMAN	FACD2_HUMAN	FANCD2	1.04211	1.02084	0.706252	1.36837
sp|Q14008|CKAP5_HUMAN	CKAP5_HUMAN	CKAP5	7.0736	2.65962	0.704303	2.56538
sp|Q13283|G3BP1_HUMAN	G3BP1_HUMAN	G3BP1	0	0	0.702748	1.07518
sp|Q8NF37|PCAT1_HUMAN	PCAT1_HUMAN	LPCAT1	0	0	0.701964	-0.792553
sp|P02786|TFR1_HUMAN	TFR1_HUMAN	TFRC	4.11968	2.0297	0.699017	1.58656
sp|P35613|BASI_HUMAN	BASI_HUMAN	BSG	5.94124	2.43747	0.691891	1.79013
sp|P50502|F10A1_HUMAN;sp|Q8NFI4|F10A5_HUMAN;sp|Q8IZP2|ST134_HUMAN	F10A1_HUMAN	ST13	4.35905	2.08783	0.691281	1.69316
sp|Q9HAV4|XPO5_HUMAN	XPO5_HUMAN	XPO5	0	0	0.680823	-0.61234
sp|P17987|TCPA_HUMAN	TCPA_HUMAN	TCP1	4.73859	2.17683	0.679938	1.93568
sp|Q9NZJ5|E2AK3_HUMAN	E2AK3_HUMAN	EIF2AK3	21.334	4.61888	0.678813	1.27377
sp|Q96AG4|LRC59_HUMAN	LRC59_HUMAN	LRRC59	2.94647	1.71653	0.677379	1.1775
sp|P48651|PTSS1_HUMAN	PTSS1_HUMAN	PTDSS1	2.37364	1.54066	0.676721	1.38384
sp|Q96A65|EXOC4_HUMAN	EXOC4_HUMAN	EXOC4	5.55334	2.35655	0.675034	1.67657
sp|Q8IV50|LYSM2_HUMAN	LYSM2_HUMAN	#N/A	#N/A	#N/A	0.674838	1.06823
sp|Q9H2J7|S6A15_HUMAN	S6A15_HUMAN	SLC6A15	5.98355	2.44613	0.673794	1.00067
sp|Q9Y4W6|AFG32_HUMAN	AFG32_HUMAN	AFG3L2	5.17815	2.27555	0.664979	1.75168
sp|Q96RP9|EFGM_HUMAN	EFGM_HUMAN	GFM1	0	0	0.664063	-0.806113
sp|Q15311|RBP1_HUMAN	RBP1_HUMAN	RALBP1	0	0	0.66401	1.74398
sp|Q9HCD6|TANC2_HUMAN	TANC2_HUMAN	TANC2	8.32678	2.88562	0.663851	1.11438
sp|P24534|EF1B_HUMAN	EF1B_HUMAN	EEF1B2	0	0	0.661718	0.839947
sp|Q8N6R0|MET13_HUMAN	MET13_HUMAN	METTL13	7.84976	2.80174	0.660399	1.12812
sp|O14802|RPC1_HUMAN	RPC1_HUMAN	POLR3A	35.8177	5.98479	0.659769	1.19893
sp|Q9NW68|BSDC1_HUMAN	BSDC1_HUMAN	BSDC1	27.0388	5.19988	0.659708	0.620949
sp|Q03001|DYST_HUMAN	DYST_HUMAN	DST	12.4517	3.5287	0.659516	2.48371
sp|P25098|ARBK1_HUMAN	ARBK1_HUMAN	GRK2	0	0	0.657099	0.708214
sp|P09884|DPOLA_HUMAN	DPOLA_HUMAN	POLA1	0	0	0.652187	0.675668
sp|Q9BSJ8|ESYT1_HUMAN	ESYT1_HUMAN	ESYT1	5.70247	2.38798	0.651217	1.91983
sp|Q9BZF1|OSBL8_HUMAN	OSBL8_HUMAN	OSBPL8	6.59796	2.56865	0.650521	1.16954
sp|Q9NWS0|PIHD1_HUMAN	PIHD1_HUMAN	PIH1D1	0	0	0.650415	1.27636
sp|O95248|MTMR5_HUMAN	MTMR5_HUMAN	SBF1	0	0	0.649749	-2.04348
sp|P49959|MRE11_HUMAN	MRE11_HUMAN	MRE11	4.74136	2.17747	0.645882	1.27624
sp|O95470|SGPL1_HUMAN	SGPL1_HUMAN	SGPL1	6.47861	2.54531	0.64494	2.02945
sp|Q8N0Z3|SPICE_HUMAN	SPICE_HUMAN	SPICE1	7.06316	2.65766	0.643765	1.73381
sp|Q8N9N7|LRC57_HUMAN	LRC57_HUMAN	LRRC57	0	0	0.640733	1.19412
sp|Q9UQN3|CHM2B_HUMAN	CHM2B_HUMAN	CHMP2B	3.27562	1.80987	0.637369	1.60062
sp|Q5T8D3|ACBD5_HUMAN	ACBD5_HUMAN	ACBD5	7.72707	2.77976	0.634494	1.62811
sp|Q14789|GOGB1_HUMAN	GOGB1_HUMAN	GOLGB1	13.877	3.72519	0.633463	2.20969
sp|P11717|MPRI_HUMAN	MPRI_HUMAN	IGF2R	6.04216	2.45808	0.628975	1.88207
sp|Q9H1E3|NUCKS_HUMAN	NUCKS_HUMAN	NUCKS1	4.62859	2.15142	0.628918	1.10872
sp|Q9Y450|HBS1L_HUMAN	HBS1L_HUMAN	HBS1L	6.36153	2.52221	0.627048	1.50965
sp|P27824|CALX_HUMAN	CALX_HUMAN	CANX	8.53589	2.92162	0.626218	1.77527
sp|Q92616|GCN1_HUMAN	GCN1_HUMAN	GCN1	5.08192	2.25431	0.624751	1.77374
sp|O00151|PDLI1_HUMAN	PDLI1_HUMAN	PDLIM1	3.53557	1.88031	0.624145	1.46812
sp|Q9Y2Z0|SGT1_HUMAN	SGT1_HUMAN	SUGT1	4.50394	2.12225	0.623666	1.54715
sp|Q9BRS2|RIOK1_HUMAN	RIOK1_HUMAN	RIOK1	4.71529	2.17147	0.623593	1.079
sp|P55197|AF10_HUMAN	AF10_HUMAN	MLLT10	0	0	0.623404	0.612274
sp|P51571|SSRD_HUMAN	SSRD_HUMAN	SSR4	0	0	0.623259	0.707929
sp|Q8IYU8|MICU2_HUMAN	MICU2_HUMAN	MICU2	0	0	0.621647	1.24117
sp|P54577|SYYC_HUMAN	SYYC_HUMAN	YARS	0	0	0.621471	0.778179
sp|P08243|ASNS_HUMAN	ASNS_HUMAN	ASNS	0	0	0.620255	0.86806
sp|Q9Y2J2|E41L3_HUMAN	E41L3_HUMAN	EPB41L3	5.1842	2.27688	0.619127	1.75545
sp|Q9UJV9|DDX41_HUMAN	DDX41_HUMAN	DDX41	10.3775	3.22141	0.617869	1.27002
sp|O43169|CYB5B_HUMAN	CYB5B_HUMAN	CYB5B	8.44901	2.90672	0.617621	1.7339
sp|Q9NZI8|IF2B1_HUMAN	IF2B1_HUMAN	IGF2BP1	2.24003	1.49667	0.615916	1.19315
sp|P10412|H14_HUMAN	H14_HUMAN	HIST1H1E	15.7053	3.963	0.613678	0.999573
sp|Q92598|HS105_HUMAN	HS105_HUMAN	HSPH1	6.27365	2.50472	0.612965	2.30333
sp|P62910|RL32_HUMAN	RL32_HUMAN	RPL32	3.04151	1.74399	0.61258	1.27931
sp|Q9ULE6|PALD_HUMAN	PALD_HUMAN	PALD1	5.19577	2.27942	0.61251	1.82527
sp|Q9HB71|CYBP_HUMAN	CYBP_HUMAN	CACYBP	4.12109	2.03005	0.610536	1.66957
sp|Q8IWS0|PHF6_HUMAN	PHF6_HUMAN	PHF6	6.26428	2.50285	0.609565	1.71041
sp|Q9P2E9|RRBP1_HUMAN	RRBP1_HUMAN	RRBP1	7.84047	2.80008	0.607409	2.50251
sp|Q96HY6|DDRGK_HUMAN	DDRGK_HUMAN	DDRGK1	12.14	3.48425	0.60415	1.28775
sp|P11171|41_HUMAN	41_HUMAN	EPB41	6.07271	2.46429	0.603376	1.79581
sp|Q15417|CNN3_HUMAN	CNN3_HUMAN	CNN3	3.68352	1.91925	0.601488	1.66662
sp|O00203|AP3B1_HUMAN	AP3B1_HUMAN	AP3B1	4.06411	2.01596	0.600626	1.01555
sp|Q7L804|RFIP2_HUMAN	RFIP2_HUMAN	RAB11FIP2	1.32923	1.15292	0.597414	1.36219
sp|O75821|EIF3G_HUMAN	EIF3G_HUMAN	EIF3G	0	0	0.597022	0.88689
sp|Q9UNL2|SSRG_HUMAN	SSRG_HUMAN	#N/A	#N/A	#N/A	0.594997	0.512388
sp|P12236|ADT3_HUMAN	ADT3_HUMAN	SLC25A6	7.78536	2.79023	0.59467	1.3142
sp|P35030|TRY3_HUMAN	TRY3_HUMAN	PRSS3	0	0	0.594125	1.765
sp|P31948|STIP1_HUMAN	STIP1_HUMAN	STIP1	6.74166	2.59647	0.592092	1.9733
sp|Q7Z2K8|GRIN1_HUMAN	GRIN1_HUMAN	GPRIN1	50.5605	7.11059	0.592009	1.19734
sp|Q5JTC6|AMER1_HUMAN	AMER1_HUMAN	AMER1	0	0	0.591298	0.602772
sp|Q6MZP7|LIN54_HUMAN	LIN54_HUMAN	LIN54	16.035	4.00437	0.590889	1.05299
sp|Q9NZZ3|CHMP5_HUMAN	CHMP5_HUMAN	CHMP5	0	0	0.590373	1.21303
sp|Q99707|METH_HUMAN	METH_HUMAN	MTR	17.8429	4.22408	0.58635	2.19513
sp|P49207|RL34_HUMAN	RL34_HUMAN	RPL34	2.55237	1.59761	0.580737	0.804263
sp|O75691|UTP20_HUMAN	UTP20_HUMAN	UTP20	8.38128	2.89504	0.580258	1.72121
sp|P12270|TPR_HUMAN	TPR_HUMAN	TPR	12.0496	3.47125	0.579501	1.43954
sp|P46781|RS9_HUMAN	RS9_HUMAN	RPS9	3.57997	1.89208	0.579141	1.49454
sp|Q9NZ01|TECR_HUMAN	TECR_HUMAN	TECR	3.93446	1.98355	0.575587	1.78608
sp|Q8IXW5|RPAP2_HUMAN	RPAP2_HUMAN	RPAP2	0	0	0.573892	0.789765
sp|O15235|RT12_HUMAN	RT12_HUMAN	MRPS12	7.18555	2.68059	0.571377	1.62075
sp|Q02790|FKBP4_HUMAN	FKBP4_HUMAN	FKBP4	0	0	0.570745	-1.24504
sp|Q14103|HNRPD_HUMAN	HNRPD_HUMAN	HNRNPD	0	0	0.570503	0.832001
sp|P36542|ATPG_HUMAN	ATPG_HUMAN	ATP5F1C	3.21582	1.79327	0.569433	1.56181
sp|Q9Y6M7|S4A7_HUMAN	S4A7_HUMAN	SLC4A7	5.9381	2.43682	0.569315	1.80582
sp|P08238|HS90B_HUMAN	HS90B_HUMAN	HSP90AB1	6.75038	2.59815	0.569253	0.829281
sp|Q99848|EBP2_HUMAN	EBP2_HUMAN	EBNA1BP2	0	0	0.568153	1.34356
sp|P06748|NPM_HUMAN	NPM_HUMAN	NPM1	4.1528	2.03784	0.566029	1.51989
sp|O95373|IPO7_HUMAN	IPO7_HUMAN	IPO7	8.29581	2.88025	0.565984	1.8325
sp|O75381|PEX14_HUMAN	PEX14_HUMAN	PEX14	4.75048	2.17956	0.563742	1.54103
sp|Q9H7N4|SFR19_HUMAN	SFR19_HUMAN	SCAF1	2.08448	1.44377	0.562452	1.40512
sp|Q8IVF7|FMNL3_HUMAN	FMNL3_HUMAN	FMNL3	4.71827	2.17216	0.560799	1.77188
sp|Q15836|VAMP3_HUMAN	VAMP3_HUMAN	VAMP3	3.98116	1.99529	0.559301	1.29389
sp|Q12965|MYO1E_HUMAN	MYO1E_HUMAN	MYO1E	13.4382	3.66581	0.556891	0.921006
sp|P63244|RACK1_HUMAN	RACK1_HUMAN	RACK1	2.99117	1.7295	0.556835	1.56349
sp|P49368|TCPG_HUMAN	TCPG_HUMAN	CCT3	6.23421	2.49684	0.556428	1.19017
sp|O14976|GAK_HUMAN	GAK_HUMAN	GAK	10.105	3.17883	0.55493	1.43967
sp|Q13823|NOG2_HUMAN	NOG2_HUMAN	GNL2	4.87853	2.20874	0.55424	1.61664
sp|P35579|MYH9_HUMAN	MYH9_HUMAN	MYH9	7.54358	2.74656	0.550348	1.68186
sp|Q13325|IFIT5_HUMAN	IFIT5_HUMAN	IFIT5	4.38687	2.09449	0.54951	1.09576
sp|P60842|IF4A1_HUMAN	IF4A1_HUMAN	EIF4A1	5.83846	2.41629	0.547718	1.43208
sp|O75915|PRAF3_HUMAN	PRAF3_HUMAN	ARL6IP5	10.5698	3.25112	0.545776	1.27868
sp|P62847|RS24_HUMAN	RS24_HUMAN	RPS24	3.02894	1.74038	0.543722	0.74443
sp|P49458|SRP09_HUMAN	SRP09_HUMAN	SRP9	0	0	0.542987	-0.976706
sp|Q71U36|TBA1A_HUMAN	TBA1A_HUMAN	TUBA1A	0	0	0.542812	1.08279
sp|Q9HD67|MYO10_HUMAN	MYO10_HUMAN	MYO10	17.8716	4.22748	0.541666	1.44661
sp|O95757|HS74L_HUMAN	HS74L_HUMAN	HSPA4L	19.678	4.43599	0.541203	1.12837
sp|Q96AY4|TTC28_HUMAN	TTC28_HUMAN	TTC28	5.25316	2.29198	0.540848	2.16164
sp|Q7Z4Q2|HEAT3_HUMAN	HEAT3_HUMAN	HEATR3	2.4791	1.57452	0.539797	0.680906
sp|Q8IZ21|PHAR4_HUMAN	PHAR4_HUMAN	PHACTR4	7.8142	2.79539	0.53896	1.09628
sp|P62979|RS27A_HUMAN;sp|P0CG47|UBB_HUMAN;sp|P0CG48|UBC_HUMAN	RS27A_HUMAN	RPS27A	4.55897	2.13518	0.537171	0.415972
sp|P56182|RRP1_HUMAN	RRP1_HUMAN	RRP1	4.32879	2.08057	0.533695	1.38287
sp|Q96EB1|ELP4_HUMAN	ELP4_HUMAN	ELP4	2.27124	1.50706	0.533002	0.868665
sp|Q8IZA0|K319L_HUMAN	K319L_HUMAN	KIAA0319L	5.11866	2.26245	0.532577	1.15967
sp|Q16850|CP51A_HUMAN	CP51A_HUMAN	CYP51A1	6.88539	2.624	0.531556	0.681554
sp|Q5VZ89|DEN4C_HUMAN	DEN4C_HUMAN	DENND4C	11.7735	3.43126	0.530604	1.82036
sp|Q9NR09|BIRC6_HUMAN	BIRC6_HUMAN	BIRC6	94.7404	9.73347	0.529938	1.86314
sp|O95486|SC24A_HUMAN	SC24A_HUMAN	SEC24A	0	0	0.528539	0.714632
sp|Q8IY81|SPB1_HUMAN	SPB1_HUMAN	FTSJ3	4.48445	2.11765	0.526933	1.0509
sp|O95793|STAU1_HUMAN	STAU1_HUMAN	STAU1	0	0	0.52642	0.894056
sp|Q5C9Z4|NOM1_HUMAN	NOM1_HUMAN	NOM1	5.05018	2.24726	0.52594	1.13744
sp|Q9H8Y8|GORS2_HUMAN	GORS2_HUMAN	GORASP2	1.41421	1.18921	0.524904	1.46543
sp|Q5JSH3|WDR44_HUMAN	WDR44_HUMAN	WDR44	5.83787	2.41617	0.523649	1.60137
sp|P78347|GTF2I_HUMAN	GTF2I_HUMAN	GTF2I	3.09884	1.76035	0.522667	1.24722
sp|Q8NDI1|EHBP1_HUMAN	EHBP1_HUMAN	EHBP1	4.00958	2.00239	0.5208	-1.03164
sp|Q14331|FRG1_HUMAN	FRG1_HUMAN	FRG1	1.26342	1.12402	0.520789	1.33483
sp|Q9Y490|TLN1_HUMAN	TLN1_HUMAN	TLN1	8.44793	2.90653	0.519715	1.65322
sp|Q5HYI7|MTX3_HUMAN	MTX3_HUMAN	MTX3	4.02613	2.00652	0.518119	1.31024
sp|Q04637|IF4G1_HUMAN	IF4G1_HUMAN	EIF4G1	7.73645	2.78145	0.517975	1.74375
sp|P55196|AFAD_HUMAN	AFAD_HUMAN	AFDN	15.0824	3.88361	0.517853	1.73177
sp|O75962|TRIO_HUMAN	TRIO_HUMAN	TRIO	2.06288	1.43627	0.517624	0.788456
sp|P32780|TF2H1_HUMAN	TF2H1_HUMAN	GTF2H1	1.3326	1.15438	0.508289	0.880221
sp|Q86YQ8|CPNE8_HUMAN	CPNE8_HUMAN	CPNE8	6.16158	2.48225	0.507303	-0.553809
sp|O43175|SERA_HUMAN	SERA_HUMAN	PHGDH	6.24983	2.49997	0.506984	1.24543
sp|Q9UPQ9|TNR6B_HUMAN	TNR6B_HUMAN	TNRC6B	1.28798	1.13489	0.506171	0.834363
sp|Q9NVI7|ATD3A_HUMAN	ATD3A_HUMAN	ATAD3A	3.32889	1.82453	0.505495	1.27101
sp|P33991|MCM4_HUMAN	MCM4_HUMAN	MCM4	0	0	0.505317	0.5449
sp|P16401|H15_HUMAN	H15_HUMAN	HIST1H1B	0	0	0.504428	1.30261
sp|Q5T8P6|RBM26_HUMAN	RBM26_HUMAN	RBM26	3.75043	1.9366	0.504127	-1.21714
sp|P52789|HXK2_HUMAN	HXK2_HUMAN	HK2	7.11643	2.66766	0.503307	1.77791
sp|P61978|HNRPK_HUMAN	HNRPK_HUMAN	HNRNPK	2.91682	1.70787	0.500221	1.26711
sp|Q969Q0|RL36L_HUMAN	RL36L_HUMAN	RPL36AL	7.58775	2.75459	0.499841	1.5231
sp|Q9NVN8|GNL3L_HUMAN	GNL3L_HUMAN	GNL3L	5.77876	2.40391	0.497651	1.36329
sp|Q9ULS5|TMCC3_HUMAN	TMCC3_HUMAN	TMCC3	0	0	0.497504	0.627245
sp|Q9Y4I1|MYO5A_HUMAN	MYO5A_HUMAN	MYO5A	1.68342	1.29747	0.496965	-0.871893
sp|P49069|CAMLG_HUMAN	CAMLG_HUMAN	CAMLG	1.24978	1.11794	0.496639	1.2031
sp|Q9UID3|VPS51_HUMAN	VPS51_HUMAN	VPS51	1.99223	1.41146	0.495604	0.539566
sp|Q9H4A3|WNK1_HUMAN	WNK1_HUMAN	WNK1	0	0	0.493883	0.987144
sp|P62851|RS25_HUMAN	RS25_HUMAN	RPS25	2.28008	1.50999	0.492328	0.96417
sp|Q9Y5S2|MRCKB_HUMAN	MRCKB_HUMAN	CDC42BPB	0	0	0.49006	-0.693314
sp|Q8IVD9|NUDC3_HUMAN	NUDC3_HUMAN	NUDCD3	75.3262	8.67907	0.48938	0.800207
sp|Q96SN8|CK5P2_HUMAN	CK5P2_HUMAN	CDK5RAP2	0	0	0.488263	1.27194
sp|Q8NEY1|NAV1_HUMAN	NAV1_HUMAN	NAV1	0	0	0.485486	0.923042
sp|Q9HCM4|E41L5_HUMAN	E41L5_HUMAN	EPB41L5	4.27887	2.06854	0.483011	1.28193
sp|Q8IYB3|SRRM1_HUMAN	SRRM1_HUMAN	SRRM1	5.35396	2.31386	0.4821	1.57622
sp|P25685|DNJB1_HUMAN	DNJB1_HUMAN	DNAJB1	8.03854	2.83523	0.4805	1.26164
sp|Q6P996|PDXD1_HUMAN	PDXD1_HUMAN	PDXDC1	4.99466	2.23487	0.475629	1.29237
sp|Q9Y2X3|NOP58_HUMAN	NOP58_HUMAN	NOP58	3.88323	1.97059	0.474603	1.10456
sp|Q9H2G2|SLK_HUMAN	SLK_HUMAN	SLK	5.36989	2.3173	0.473386	1.65695
sp|P39023|RL3_HUMAN	RL3_HUMAN	RPL3	0	0	0.472889	-1.21384
sp|Q9UNX4|WDR3_HUMAN	WDR3_HUMAN	WDR3	7.05467	2.65606	0.472719	0.978877
sp|P11177|ODPB_HUMAN	ODPB_HUMAN	PDHB	4.81633	2.19461	0.472489	-0.528925
sp|Q8WY36|BBX_HUMAN	BBX_HUMAN	BBX	3.87797	1.96926	0.471799	1.53251
sp|Q9NYV4|CDK12_HUMAN	CDK12_HUMAN	CDK12	0	0	0.470926	0.958786
sp|O95613|PCNT_HUMAN	PCNT_HUMAN	PCNT	14.2594	3.77616	0.470691	1.68261
sp|Q5VT66|MARC1_HUMAN	MARC1_HUMAN	MARC1	1.32215	1.14985	0.469937	-1.20828
sp|Q8N556|AFAP1_HUMAN	AFAP1_HUMAN	AFAP1	0	0	0.469313	0.497138
sp|P62913|RL11_HUMAN	RL11_HUMAN	RPL11	2.45913	1.56816	0.469179	0.838565
sp|O75179|ANR17_HUMAN	ANR17_HUMAN	ANKRD17	8.70667	2.95071	0.468859	1.69997
sp|Q5T3I0|GPTC4_HUMAN	GPTC4_HUMAN	GPATCH4	3.7219	1.92922	0.466925	1.1507
sp|P42224|STAT1_HUMAN	STAT1_HUMAN	STAT1	11.0126	3.31852	0.464805	0.784556
sp|P40227|TCPZ_HUMAN	TCPZ_HUMAN	CCT6A	18.4968	4.30079	0.463839	1.0245
sp|Q9BU76|MMTA2_HUMAN	MMTA2_HUMAN	MMTAG2	3.48694	1.86734	0.463536	0.544352
sp|Q9Y3C1|NOP16_HUMAN	NOP16_HUMAN	NOP16	1.04417	1.02185	0.461636	-1.16751
sp|P43121|MUC18_HUMAN	MUC18_HUMAN	MCAM	1.45153	1.20479	0.460806	0.931263
sp|Q00325|MPCP_HUMAN	MPCP_HUMAN	SLC25A3	5.52891	2.35136	0.459823	0.852579
sp|Q9UJU6|DBNL_HUMAN	DBNL_HUMAN	DBNL	0	0	0.458486	-0.633762
sp|Q14315|FLNC_HUMAN	FLNC_HUMAN	FLNC	0	0	0.457611	1.44007
sp|A5YKK6|CNOT1_HUMAN	CNOT1_HUMAN	CNOT1	6.4169	2.53316	0.454671	1.10217
sp|O75643|U520_HUMAN	U520_HUMAN	SNRNP200	5.31032	2.30441	0.452664	1.15668
sp|P61081|UBC12_HUMAN	UBC12_HUMAN	UBE2M	2.45567	1.56706	0.452343	1.06388
sp|Q9NSE4|SYIM_HUMAN	SYIM_HUMAN	IARS2	7.01657	2.64888	0.452088	1.67392
sp|P62263|RS14_HUMAN	RS14_HUMAN	RPS14	3.13527	1.77067	0.451825	1.07431
sp|P42704|LPPRC_HUMAN	LPPRC_HUMAN	LRPPRC	0.700727	0.837094	0.451259	-1.82613
sp|P18206|VINC_HUMAN	VINC_HUMAN	VCL	3.1083	1.76304	0.450641	1.60656
sp|P18583|SON_HUMAN	SON_HUMAN	SON	6.87101	2.62126	0.450265	0.773737
sp|Q13428|TCOF_HUMAN	TCOF_HUMAN	TCOF1	10.2389	3.19983	0.450145	0.62029
sp|P42566|EPS15_HUMAN	EPS15_HUMAN	EPS15	1.38527	1.17697	0.449822	1.18993
sp|O14641|DVL2_HUMAN	DVL2_HUMAN	DVL2	3.90125	1.97516	0.446616	1.0215
sp|E9PRG8|CK098_HUMAN	CK098_HUMAN	C11orf98	4.16099	2.03985	0.445688	1.13564
sp|O75683|SURF6_HUMAN	SURF6_HUMAN	SURF6	5.64237	2.37537	0.44548	1.56159
sp|P78344|IF4G2_HUMAN	IF4G2_HUMAN	EIF4G2	4.74578	2.17848	0.445339	1.45802
sp|O95347|SMC2_HUMAN	SMC2_HUMAN	SMC2	0	0	0.442562	0.850381
sp|P53804|TTC3_HUMAN	TTC3_HUMAN	TTC3	19.1387	4.37478	0.442498	1.33488
sp|Q9UBM7|DHCR7_HUMAN	DHCR7_HUMAN	DHCR7	6.47831	2.54525	0.442251	1.25681
sp|Q15054|DPOD3_HUMAN	DPOD3_HUMAN	POLD3	0	0	0.441968	0.734816
sp|Q8IWZ3|ANKH1_HUMAN	ANKH1_HUMAN	ANKHD1	6.1835	2.48666	0.44163	1.95069
sp|P62701|RS4X_HUMAN	RS4X_HUMAN	RPS4X	4.09183	2.02283	0.440112	0.661859
sp|P49790|NU153_HUMAN	NU153_HUMAN	NUP153	5.20627	2.28173	0.437985	1.76853
sp|Q9UJS0|CMC2_HUMAN	CMC2_HUMAN	SLC25A13	13.1249	3.62283	0.437197	1.00136
sp|Q96F07|CYFP2_HUMAN	CYFP2_HUMAN	CYFIP2	0	0	0.437091	-0.397294
sp|P52701|MSH6_HUMAN	MSH6_HUMAN	MSH6	5.01982	2.2405	0.436298	1.29601
sp|P42356|PI4KA_HUMAN	PI4KA_HUMAN	PI4KA	1.7548	1.32469	0.436226	0.728719
sp|Q9H4L5|OSBL3_HUMAN	OSBL3_HUMAN	OSBPL3	4.45487	2.11066	0.435589	1.29816
sp|Q96HC4|PDLI5_HUMAN	PDLI5_HUMAN	PDLIM5	3.77074	1.94184	0.434753	1.2346
sp|P46109|CRKL_HUMAN	CRKL_HUMAN	CRKL	3.65443	1.91166	0.4295	0.939417
sp|Q92997|DVL3_HUMAN	DVL3_HUMAN	DVL3	2.62461	1.62006	0.42874	1.35177
sp|P60866|RS20_HUMAN	RS20_HUMAN	RPS20	2.41492	1.554	0.4277	1.26506
sp|Q15042|RB3GP_HUMAN	RB3GP_HUMAN	RAB3GAP1	9.4339	3.07147	0.4277	1.57036
sp|Q13136|LIPA1_HUMAN	LIPA1_HUMAN	PPFIA1	1.19559	1.09343	0.425833	-0.943273
sp|Q9UER7|DAXX_HUMAN	DAXX_HUMAN	DAXX	2.64043	1.62494	0.425235	1.18087
sp|Q9NRZ9|HELLS_HUMAN	HELLS_HUMAN	HELLS	2.05687	1.43418	0.42462	1.13702
sp|Q00535|CDK5_HUMAN	CDK5_HUMAN	CDK5	3.08926	1.75763	0.424081	0.533806
sp|Q5SVZ6|ZMYM1_HUMAN	ZMYM1_HUMAN	ZMYM1	6.07284	2.46431	0.423216	1.40457
sp|O00213|APBB1_HUMAN	APBB1_HUMAN	APBB1	3.4004	1.84402	0.417607	1.20697
sp|Q7Z589|EMSY_HUMAN	EMSY_HUMAN	EMSY	7.60656	2.758	0.417458	1.38261
sp|O75663|TIPRL_HUMAN	TIPRL_HUMAN	TIPRL	2.79922	1.67309	0.415785	1.10807
sp|Q12923|PTN13_HUMAN	PTN13_HUMAN	PTPN13	7.16256	2.6763	0.415688	1.44337
sp|O75396|SC22B_HUMAN	SC22B_HUMAN	SEC22B	0	0	0.415234	0.746198
sp|P61247|RS3A_HUMAN	RS3A_HUMAN	RPS3A	3.87327	1.96806	0.412802	1.37816
sp|Q96JB5|CK5P3_HUMAN	CK5P3_HUMAN	CDK5RAP3	2.44375	1.56325	0.41187	0.714397
sp|P62826|RAN_HUMAN	RAN_HUMAN	RAN	1.20232	1.0965	0.409489	1.01626
sp|Q9NSV4|DIAP3_HUMAN	DIAP3_HUMAN	DIAPH3	8.46319	2.90916	0.408005	1.11932
sp|Q9Y6B6|SAR1B_HUMAN	SAR1B_HUMAN	SAR1B	0	0	0.407933	0.840107
sp|Q9UBC2|EP15R_HUMAN	EP15R_HUMAN	EPS15L1	4.70401	2.16887	0.406805	1.19311
sp|P13804|ETFA_HUMAN	ETFA_HUMAN	ETFA	5.04193	2.24542	0.406795	1.32216
sp|O76024|WFS1_HUMAN	WFS1_HUMAN	WFS1	0	0	0.405629	-0.525792
sp|O76094|SRP72_HUMAN	SRP72_HUMAN	SRP72	24.9898	4.99898	0.404801	0.898945
sp|Q9HCG7|GBA2_HUMAN	GBA2_HUMAN	GBA2	0	0	0.404338	0.414656
sp|P83881|RL36A_HUMAN	RL36A_HUMAN	RPL36A	5.11113	2.26078	0.404122	0.468953
sp|A0FGR8|ESYT2_HUMAN	ESYT2_HUMAN	ESYT2	3.94767	1.98688	0.40323	1.10004
sp|Q96KG9|SCYL1_HUMAN	SCYL1_HUMAN	SCYL1	1.65812	1.28768	0.40189	0.908893
sp|P07900|HS90A_HUMAN	HS90A_HUMAN	HSP90AA1	8.05023	2.83729	0.400792	1.29658
sp|Q9UNX3|RL26L_HUMAN	RL26L_HUMAN	RPL26L1	8.0758	2.8418	0.395352	1.28766
sp|Q9NT62|ATG3_HUMAN	ATG3_HUMAN	ATG3	0	0	0.395333	0.42833
sp|Q709C8|VP13C_HUMAN	VP13C_HUMAN	VPS13C	23.66	4.86416	0.393589	1.63076
sp|P68431|H31_HUMAN;sp|Q71DI3|H32_HUMAN;sp|Q16695|H31T_HUMAN;sp|P84243|H33_HUMAN;sp|Q6NXT2|H3C_HUMAN	H31_HUMAN	HIST1H3A	0	0	0.392597	-1.2502
sp|Q07065|CKAP4_HUMAN	CKAP4_HUMAN	CKAP4	5.89056	2.42705	0.390482	0.846579
sp|Q9NRA8|4ET_HUMAN	4ET_HUMAN	EIF4ENIF1	4.13176	2.03267	0.389258	1.2638
sp|Q15758|AAAT_HUMAN	AAAT_HUMAN	SLC1A5	5.03783	2.24451	0.388969	0.798361
sp|Q99878|H2A1J_HUMAN;sp|Q96KK5|H2A1H_HUMAN;sp|Q9BTM1|H2AJ_HUMAN;sp|Q16777|H2A2C_HUMAN;sp|Q93077|H2A1C_HUMAN;sp|Q7L7L0|H2A3_HUMAN;sp|Q6FI13|H2A2A_HUMAN;sp|P20671|H2A1D_HUMAN;sp|P0C0S8|H2A1_HUMAN;sp|P04908|H2A1B_HUMAN;sp|Q71UI9|H2AV_HUMAN;sp|P0C0S5|H2AZ_HUMAN;sp|Q96QV6|H2A1A_HUMAN;sp|P16104|H2AX_HUMAN	H2A1J_HUMAN	HIST1H2AJ	0	0	0.387807	0.925531
sp|Q9Y2R4|DDX52_HUMAN	DDX52_HUMAN	DDX52	4.5379	2.13023	0.386278	0.875887
sp|P48643|TCPE_HUMAN	TCPE_HUMAN	CCT5	1.94458	1.39448	0.384527	0.969444
sp|Q9UHQ9|NB5R1_HUMAN	NB5R1_HUMAN	CYB5R1	3.24662	1.80184	0.384165	1.12576
sp|Q9H3U1|UN45A_HUMAN	UN45A_HUMAN	UNC45A	4.64635	2.15554	0.384144	1.50454
sp|P07195|LDHB_HUMAN	LDHB_HUMAN	LDHB	9.16761	3.02781	0.38407	0.955495
sp|Q7Z6K5|ARPIN_HUMAN	ARPIN_HUMAN	ARPIN	2.59158	1.60984	0.380618	1.23955
sp|Q9UNZ2|NSF1C_HUMAN	NSF1C_HUMAN	NSFL1C	0	0	0.377505	-0.76973
sp|Q9Y4P3|TBL2_HUMAN	TBL2_HUMAN	TBL2	4.5611	2.13567	0.37726	1.08156
sp|Q7LBC6|KDM3B_HUMAN	KDM3B_HUMAN	KDM3B	28.5947	5.3474	0.375721	0.687245
sp|P62280|RS11_HUMAN	RS11_HUMAN	RPS11	3.60222	1.89795	0.373843	1.12003
sp|Q96AQ6|PBIP1_HUMAN	PBIP1_HUMAN	PBXIP1	0	0	0.372933	0.582761
sp|P37802|TAGL2_HUMAN	TAGL2_HUMAN	TAGLN2	3.65884	1.91281	0.372389	0.708565
sp|Q9NUQ8|ABCF3_HUMAN	ABCF3_HUMAN	ABCF3	0	0	0.368771	0.488154
sp|Q14247|SRC8_HUMAN	SRC8_HUMAN	CTTN	4.15973	2.03954	0.368709	0.95771
sp|Q99442|SEC62_HUMAN	SEC62_HUMAN	SEC62	6.21896	2.49378	0.367878	1.39463
sp|P12277|KCRB_HUMAN	KCRB_HUMAN	CKB	0	0	0.367381	0.584305
sp|P05412|JUN_HUMAN	JUN_HUMAN	JUN	0	0	0.365928	0.645398
sp|Q9Y2L1|RRP44_HUMAN	RRP44_HUMAN	DIS3	18.544	4.30627	0.365125	0.855652
sp|O00483|NDUA4_HUMAN	NDUA4_HUMAN	NDUFA4	0	0	0.363506	0.920825
sp|O75592|MYCB2_HUMAN	MYCB2_HUMAN	MYCBP2	14.3992	3.79463	0.363117	1.36828
sp|Q00005|2ABB_HUMAN;sp|P63151|2ABA_HUMAN;sp|Q66LE6|2ABD_HUMAN	2ABB_HUMAN	#N/A	#N/A	#N/A	0.359783	-0.428484
sp|Q96CS3|FAF2_HUMAN	FAF2_HUMAN	FAF2	3.34311	1.82842	0.359179	0.916371
sp|O60271|JIP4_HUMAN	JIP4_HUMAN	SPAG9	5.60788	2.3681	0.358131	1.07705
sp|Q96AG3|S2546_HUMAN	S2546_HUMAN	SLC25A46	0	0	0.357816	-0.888741
sp|Q00839|HNRPU_HUMAN	HNRPU_HUMAN	HNRNPU	6.86433	2.61999	0.357322	1.04677
sp|O43402|EMC8_HUMAN	EMC8_HUMAN	EMC8	2.37693	1.54173	0.356983	0.547999
sp|Q9BY89|K1671_HUMAN	K1671_HUMAN	KIAA1671	0	0	0.356698	-0.66864
sp|Q14683|SMC1A_HUMAN	SMC1A_HUMAN	SMC1A	4.02454	2.00612	0.356623	1.25685
sp|Q7Z6Z7|HUWE1_HUMAN	HUWE1_HUMAN	HUWE1	6.97297	2.64064	0.356118	1.26525
sp|Q92574|TSC1_HUMAN	TSC1_HUMAN	TSC1	7.29671	2.70124	0.35122	0.82064
sp|O95721|SNP29_HUMAN	SNP29_HUMAN	SNAP29	3.71258	1.92681	0.350995	0.922583
sp|Q53H12|AGK_HUMAN	AGK_HUMAN	AGK	5.59723	2.36585	0.350215	1.06386
sp|Q9UPW5|CBPC1_HUMAN	CBPC1_HUMAN	AGTPBP1	4.14145	2.03506	0.347986	-0.93139
sp|P09543|CN37_HUMAN	CN37_HUMAN	CNP	1.84964	1.36001	0.34789	0.675707
sp|Q92540|SMG7_HUMAN	SMG7_HUMAN	SMG7	3.13226	1.76982	0.346824	-0.938193
sp|P68371|TBB4B_HUMAN	TBB4B_HUMAN	TUBB4B	6.63933	2.57669	0.346521	0.563099
sp|Q8WTT2|NOC3L_HUMAN	NOC3L_HUMAN	NOC3L	4.9499	2.22484	0.346186	0.937314
sp|O95372|LYPA2_HUMAN	LYPA2_HUMAN	LYPLA2	2.43473	1.56036	0.345719	1.05647
sp|P30041|PRDX6_HUMAN	PRDX6_HUMAN	PRDX6	0	0	0.34542	0.546722
sp|P84077|ARF1_HUMAN;sp|P61204|ARF3_HUMAN	ARF1_HUMAN	ARF1	2.39236	1.54673	0.345266	0.571001
sp|P50416|CPT1A_HUMAN	CPT1A_HUMAN	CPT1A	3.91102	1.97763	0.341989	1.00958
sp|Q92625|ANS1A_HUMAN	ANS1A_HUMAN	ANKS1A	3.65109	1.91078	0.341681	-0.920706
sp|P07355|ANXA2_HUMAN;sp|A6NMY6|AXA2L_HUMAN	ANXA2_HUMAN	ANXA2	0	0	0.341607	-0.843798
sp|P83731|RL24_HUMAN	RL24_HUMAN	RPL24	3.79414	1.94785	0.341427	0.402036
sp|Q969Z3|MARC2_HUMAN	MARC2_HUMAN	MARC2	3.49523	1.86955	0.341228	0.723601
sp|O94874|UFL1_HUMAN	UFL1_HUMAN	UFL1	7.28715	2.69947	0.339443	1.06359
sp|Q5THJ4|VP13D_HUMAN	VP13D_HUMAN	VPS13D	9.60725	3.09956	0.337054	1.57018
sp|Q06830|PRDX1_HUMAN	PRDX1_HUMAN	PRDX1	2.76228	1.66201	0.336126	0.479668
sp|Q92575|UBXN4_HUMAN	UBXN4_HUMAN	UBXN4	4.324	2.07942	0.335698	0.724004
sp|Q9UH62|ARMX3_HUMAN	ARMX3_HUMAN	ARMCX3	3.1709	1.7807	0.334329	1.24325
sp|O00750|P3C2B_HUMAN	P3C2B_HUMAN	PIK3C2B	2.08308	1.44329	0.334233	0.742892
sp|Q16650|TBR1_HUMAN	TBR1_HUMAN	TBR1	0	0	0.333212	-0.588209
sp|P19367|HXK1_HUMAN	HXK1_HUMAN	HK1	8.21374	2.86596	0.330873	0.965156
sp|P16615|AT2A2_HUMAN	AT2A2_HUMAN	ATP2A2	8.62375	2.93662	0.32936	1.11861
sp|Q562F6|SGO2_HUMAN	SGO2_HUMAN	SGO2	1.52716	1.23578	0.328838	-1.27554
sp|P63261|ACTG_HUMAN;sp|P60709|ACTB_HUMAN	ACTG_HUMAN	ACTG1	0	0	0.327995	0.645561
sp|P20020|AT2B1_HUMAN	AT2B1_HUMAN	ATP2B1	5.5306	2.35172	0.327665	1.13586
sp|Q8N8S7|ENAH_HUMAN	ENAH_HUMAN	#N/A	#N/A	#N/A	0.325363	-0.372448
sp|Q9NP61|ARFG3_HUMAN	ARFG3_HUMAN	ARFGAP3	0	0	0.32466	-0.742106
sp|P15880|RS2_HUMAN	RS2_HUMAN	RPS2	3.11935	1.76617	0.323238	0.629553
sp|P35268|RL22_HUMAN	RL22_HUMAN	RPL22	0	0	0.322763	-1.00118
sp|P06733|ENOA_HUMAN	ENOA_HUMAN	ENO1	3.11242	1.76421	0.32265	0.922411
sp|P07814|SYEP_HUMAN	SYEP_HUMAN	EPRS	5.01651	2.23976	0.321524	1.08369
sp|Q9NRN7|ADPPT_HUMAN	ADPPT_HUMAN	AASDHPPT	0	0	0.321209	0.521264
sp|P35658|NU214_HUMAN	NU214_HUMAN	NUP214	20.2608	4.50119	0.31922	0.893329
sp|P22392|NDKB_HUMAN;sp|O60361|NDK8_HUMAN	NDKB_HUMAN	NME2	0	0	0.317446	0.930008
sp|P62266|RS23_HUMAN	RS23_HUMAN	RPS23	4.26859	2.06606	0.317289	0.446725
sp|O43491|E41L2_HUMAN	E41L2_HUMAN	EPB41L2	5.15362	2.27016	0.31632	0.930577
sp|Q9H6U6|BCAS3_HUMAN	BCAS3_HUMAN	BCAS3	0	0	0.316008	-0.534293
sp|Q9BVP2|GNL3_HUMAN	GNL3_HUMAN	GNL3	9.78774	3.12854	0.314805	0.33401
sp|P00338|LDHA_HUMAN	LDHA_HUMAN	LDHA	1.33893	1.15712	0.314591	0.957634
sp|Q8IXI1|MIRO2_HUMAN	MIRO2_HUMAN	RHOT2	3.54359	1.88244	0.313091	0.919134
sp|Q8TCG1|CIP2A_HUMAN	CIP2A_HUMAN	CIP2A	4.67786	2.16284	0.311922	1.00427
sp|Q2M2I8|AAK1_HUMAN	AAK1_HUMAN	AAK1	0	0	0.311395	-0.710134
sp|P18031|PTN1_HUMAN	PTN1_HUMAN	PTPN1	3.88864	1.97196	0.30981	0.416429
sp|Q1ED39|KNOP1_HUMAN	KNOP1_HUMAN	KNOP1	3.23675	1.7991	0.30779	0.893081
sp|Q9Y4C1|KDM3A_HUMAN	KDM3A_HUMAN	KDM3A	0	0	0.307666	-0.354145
sp|O15498|YKT6_HUMAN	YKT6_HUMAN	YKT6	4.39564	2.09658	0.307564	0.39005
sp|Q8TEQ6|GEMI5_HUMAN	GEMI5_HUMAN	GEMIN5	7.24769	2.69215	0.306554	1.24387
sp|Q93008|USP9X_HUMAN	USP9X_HUMAN	USP9X	0	0	0.302526	0.688279
sp|Q8IZH2|XRN1_HUMAN	XRN1_HUMAN	XRN1	3.40575	1.84547	0.301539	-1.31148
sp|Q8N7H5|PAF1_HUMAN	PAF1_HUMAN	#N/A	#N/A	#N/A	0.29997	-0.338837
sp|Q6GYQ0|RGPA1_HUMAN	RGPA1_HUMAN	RALGAPA1	11.0176	3.31927	0.299763	0.630184
sp|Q14684|RRP1B_HUMAN	RRP1B_HUMAN	RRP1B	5.53162	2.35194	0.299626	0.486261
sp|Q9BWH2|FUND2_HUMAN	FUND2_HUMAN	FUNDC2	2.56632	1.60198	0.297632	0.591794
sp|Q96EY4|TMA16_HUMAN	TMA16_HUMAN	TMA16	3.07838	1.75453	0.295198	1.03679
sp|Q9NVH0|EXD2_HUMAN	EXD2_HUMAN	EXD2	5.11282	2.26115	0.294852	-0.421019
sp|Q9UPN3|MACF1_HUMAN	MACF1_HUMAN	MACF1	11.8601	3.44386	0.29439	1.19827
sp|P68363|TBA1B_HUMAN	TBA1B_HUMAN	TUBA1B	6.75188	2.59844	0.29403	0.26688
sp|Q8WUK0|PTPM1_HUMAN	PTPM1_HUMAN	PTPMT1	0	0	0.293618	-0.591251
sp|Q00341|VIGLN_HUMAN	VIGLN_HUMAN	HDLBP	4.25936	2.06382	0.29313	-1.23133
sp|P61758|PFD3_HUMAN	PFD3_HUMAN	VBP1	0	0	0.292458	0.610877
sp|O00410|IPO5_HUMAN	IPO5_HUMAN	IPO5	2.83701	1.68434	0.292251	0.721957
sp|P49411|EFTU_HUMAN	EFTU_HUMAN	TUFM	3.91386	1.97835	0.291527	0.687111
sp|Q71UM5|RS27L_HUMAN	RS27L_HUMAN	RPS27L	0	0	0.291303	1.22709
sp|Q02878|RL6_HUMAN	RL6_HUMAN	RPL6	0	0	0.291027	-0.953256
sp|P23396|RS3_HUMAN	RS3_HUMAN	RPS3	3.79812	1.94888	0.289325	0.866686
sp|P22314|UBA1_HUMAN	UBA1_HUMAN	UBA1	1.2679	1.12601	0.28884	0.550577
sp|O00264|PGRC1_HUMAN	PGRC1_HUMAN	PGRMC1	1.67441	1.29399	0.288827	0.831092
sp|O94830|DDHD2_HUMAN	DDHD2_HUMAN	DDHD2	5.14743	2.2688	0.285322	0.500509
sp|O75431|MTX2_HUMAN	MTX2_HUMAN	MTX2	0	0	0.285099	0.633838
sp|P78310|CXAR_HUMAN	CXAR_HUMAN	CXADR	1.71652	1.31016	0.284543	0.674936
sp|Q5VWG9|TAF3_HUMAN	TAF3_HUMAN	#N/A	#N/A	#N/A	0.283875	-0.327608
sp|Q658Y4|F91A1_HUMAN	F91A1_HUMAN	FAM91A1	6.02731	2.45506	0.283208	1.04566
sp|Q9ULJ7|ANR50_HUMAN	ANR50_HUMAN	ANKRD50	3.61161	1.90042	0.278386	0.46482
sp|Q3YEC7|RABL6_HUMAN	RABL6_HUMAN	RABL6	3.1789	1.78295	0.277593	0.949638
sp|O76003|GLRX3_HUMAN	GLRX3_HUMAN	#N/A	#N/A	#N/A	0.277009	0.33765
sp|Q9ULT8|HECD1_HUMAN	HECD1_HUMAN	HECTD1	147.283	12.136	0.27694	-0.618092
sp|Q14677|EPN4_HUMAN	EPN4_HUMAN	CLINT1	3.45776	1.8595	0.274749	0.940943
sp|O75533|SF3B1_HUMAN	SF3B1_HUMAN	SF3B1	4.08623	2.02144	0.273945	0.663953
sp|P63010|AP2B1_HUMAN	AP2B1_HUMAN	AP2B1	1.82331	1.3503	0.273933	0.532367
sp|Q9BR76|COR1B_HUMAN	COR1B_HUMAN	CORO1B	3.74292	1.93466	0.273649	0.709987
sp|Q9Y4W2|LAS1L_HUMAN	LAS1L_HUMAN	LAS1L	0	0	0.273381	-0.571303
sp|O00522|KRIT1_HUMAN	KRIT1_HUMAN	#N/A	#N/A	#N/A	0.272897	-0.338177
sp|Q93009|UBP7_HUMAN	UBP7_HUMAN	USP7	0	0	0.272073	0.62995
sp|Q9GZT9|EGLN1_HUMAN	EGLN1_HUMAN	EGLN1	0	0	0.271779	0.52207
sp|Q99460|PSMD1_HUMAN	PSMD1_HUMAN	PSMD1	159.034	12.6109	0.270069	1.01149
sp|P31943|HNRH1_HUMAN	HNRH1_HUMAN	HNRNPH1	0	0	0.269039	-0.335647
sp|Q7L014|DDX46_HUMAN	DDX46_HUMAN	DDX46	0	0	0.268867	0.399475
sp|O14654|IRS4_HUMAN	IRS4_HUMAN	IRS4	10.0518	3.17046	0.268286	1.24836
sp|Q8WXG6|MADD_HUMAN	MADD_HUMAN	#N/A	#N/A	#N/A	0.267482	0.356085
sp|Q7Z5K2|WAPL_HUMAN	WAPL_HUMAN	WAPL	0	0	0.267481	0.387373
sp|Q12983|BNIP3_HUMAN	BNIP3_HUMAN	BNIP3	1.05757	1.02838	0.267125	-0.611241
sp|Q5TC12|ATPF1_HUMAN	ATPF1_HUMAN	ATPAF1	2.95917	1.72022	0.265793	0.802619
sp|Q15058|KIF14_HUMAN	KIF14_HUMAN	KIF14	7.88385	2.80782	0.265009	1.17059
sp|P26373|RL13_HUMAN	RL13_HUMAN	RPL13	2.61764	1.61791	0.264597	0.37343
sp|Q09666|AHNK_HUMAN	AHNK_HUMAN	AHNAK	11.8593	3.44374	0.263171	0.951314
sp|P25705|ATPA_HUMAN	ATPA_HUMAN	ATP5F1A	6.43607	2.53694	0.261932	0.812126
sp|Q9P031|TAP26_HUMAN	TAP26_HUMAN	CCDC59	1.41227	1.18839	0.261454	-0.98437
sp|P11498|PYC_HUMAN	PYC_HUMAN	PC	14.9617	3.86803	0.260964	-0.478864
sp|Q7Z478|DHX29_HUMAN	DHX29_HUMAN	DHX29	6.76873	2.60168	0.26044	0.952341
sp|O60231|DHX16_HUMAN	DHX16_HUMAN	DHX16	0	0	0.260366	-0.502988
sp|P11940|PABP1_HUMAN	PABP1_HUMAN	PABPC1	2.05203	1.43249	0.260217	0.578233
sp|Q8TC07|TBC15_HUMAN	TBC15_HUMAN	TBC1D15	5.21601	2.28386	0.260083	0.936633
sp|P11274|BCR_HUMAN	BCR_HUMAN	BCR	4.42976	2.1047	0.259695	0.957494
sp|Q86Y13|DZIP3_HUMAN	DZIP3_HUMAN	DZIP3	0	0	0.259142	0.345483
sp|Q9BXF6|RFIP5_HUMAN	RFIP5_HUMAN	RAB11FIP5	2.71493	1.6477	0.258927	-0.903444
sp|Q9NS69|TOM22_HUMAN	TOM22_HUMAN	TOMM22	0	0	0.258137	0.759298
sp|O60493|SNX3_HUMAN	SNX3_HUMAN	SNX3	0	0	0.25745	0.343136
sp|Q9NZ45|CISD1_HUMAN	CISD1_HUMAN	CISD1	2.71718	1.64839	0.256694	0.544348
sp|Q9UPQ3|AGAP1_HUMAN	AGAP1_HUMAN	AGAP1	5.08884	2.25585	0.256543	0.74937
sp|Q58FF8|H90B2_HUMAN	H90B2_HUMAN	#N/A	#N/A	#N/A	0.256381	0.793732
sp|Q8IWB9|TEX2_HUMAN	TEX2_HUMAN	TEX2	4.60699	2.14639	0.255632	-0.534663
sp|P21796|VDAC1_HUMAN	VDAC1_HUMAN	VDAC1	0	0	0.255605	0.614822
sp|Q9UQ35|SRRM2_HUMAN	SRRM2_HUMAN	SRRM2	2.79447	1.67167	0.2552	-1.17047
sp|P33981|TTK_HUMAN	TTK_HUMAN	TTK	3.33236	1.82548	0.253778	0.889661
sp|P51003|PAPOA_HUMAN	PAPOA_HUMAN	PAPOLA	1.31843	1.14823	0.253109	0.539796
sp|O43432|IF4G3_HUMAN	IF4G3_HUMAN	EIF4G3	0	0	0.252812	-0.788407
sp|Q12800|TFCP2_HUMAN	TFCP2_HUMAN	TFCP2	0	0	0.249143	0.345282
sp|Q13492|PICAL_HUMAN	PICAL_HUMAN	PICALM	0	0	0.248812	0.554343
sp|P50747|BPL1_HUMAN	BPL1_HUMAN	HLCS	3.1449	1.77339	0.24786	0.765222
sp|Q9NZC7|WWOX_HUMAN	WWOX_HUMAN	WWOX	3.84374	1.96055	0.247213	0.661651
sp|Q12959|DLG1_HUMAN	DLG1_HUMAN	DLG1	4.50957	2.12357	0.246896	0.656337
sp|O15042|SR140_HUMAN	SR140_HUMAN	U2SURP	0	0	0.246696	-0.739834
sp|Q9P1Q0|VPS54_HUMAN	VPS54_HUMAN	VPS54	0	0	0.246637	-0.315426
sp|O14795|UN13B_HUMAN	UN13B_HUMAN	UNC13B	1.64456	1.2824	0.246429	0.537847
sp|Q14694|UBP10_HUMAN	UBP10_HUMAN	USP10	31.3488	5.599	0.246395	0.636527
sp|Q14157|UBP2L_HUMAN	UBP2L_HUMAN	UBAP2L	2.02997	1.42477	0.245279	-0.911137
sp|Q9UKK9|NUDT5_HUMAN	NUDT5_HUMAN	NUDT5	2.71241	1.64694	0.244747	0.449474
sp|Q9NVI1|FANCI_HUMAN	FANCI_HUMAN	FANCI	1.41264	1.18855	0.24228	-0.521825
sp|P56134|ATPK_HUMAN	ATPK_HUMAN	ATP5MF	0	0	0.24207	-0.411125
sp|Q8NE71|ABCF1_HUMAN	ABCF1_HUMAN	ABCF1	4.25963	2.06389	0.241478	0.611582
sp|Q9H792|PEAK1_HUMAN	PEAK1_HUMAN	PEAK1	0	0	0.241298	0.379756
sp|Q9Y467|SALL2_HUMAN	SALL2_HUMAN	SALL2	0	0	0.240725	-0.419605
sp|P62249|RS16_HUMAN	RS16_HUMAN	RPS16	3.28144	1.81148	0.239892	0.313536
sp|Q9Y6R0|NUMBL_HUMAN	NUMBL_HUMAN	NUMBL	64.1556	8.00972	0.238547	0.627307
sp|P46779|RL28_HUMAN	RL28_HUMAN	RPL28	2.74578	1.65704	0.237033	0.386205
sp|Q5JTH9|RRP12_HUMAN	RRP12_HUMAN	RRP12	8.03393	2.83442	0.236993	-0.332494
sp|Q9P0T7|TMEM9_HUMAN	TMEM9_HUMAN	TMEM9	0	0	0.235609	0.433239
sp|Q9BYG3|MK67I_HUMAN	MK67I_HUMAN	NIFK	0	0	0.234883	-0.347128
sp|Q8IWJ2|GCC2_HUMAN	GCC2_HUMAN	GCC2	6.72211	2.5927	0.233172	1.13957
sp|P25398|RS12_HUMAN	RS12_HUMAN	RPS12	0.94779	0.973545	0.231563	0.625597
sp|O14966|RAB7L_HUMAN	RAB7L_HUMAN	RAB29	2.51434	1.58567	0.227262	0.58696
sp|P55884|EIF3B_HUMAN	EIF3B_HUMAN	EIF3B	0	0	0.227259	-0.27916
sp|O00763|ACACB_HUMAN	ACACB_HUMAN	ACACB	8.5369	2.9218	0.226803	1.0881
sp|P23528|COF1_HUMAN	COF1_HUMAN	CFL1	11.2094	3.34805	0.226364	0.621933
sp|P07437|TBB5_HUMAN	TBB5_HUMAN	TUBB	6.44294	2.53829	0.224751	0.425643
sp|Q13642|FHL1_HUMAN	FHL1_HUMAN	FHL1	0	0	0.224262	-0.629087
sp|Q9Y285|SYFA_HUMAN	SYFA_HUMAN	FARSA	0	0	0.224168	0.356073
sp|Q8TDD1|DDX54_HUMAN	DDX54_HUMAN	DDX54	3.85592	1.96365	0.224036	1.0657
sp|O75190|DNJB6_HUMAN	DNJB6_HUMAN	DNAJB6	0	0	0.223857	-0.555051
sp|P61513|RL37A_HUMAN	RL37A_HUMAN	RPL37A	2.9318	1.71225	0.223773	0.537198
sp|Q99879|H2B1M_HUMAN;sp|Q99880|H2B1L_HUMAN;sp|Q99877|H2B1N_HUMAN;sp|Q93079|H2B1H_HUMAN;sp|Q5QNW6|H2B2F_HUMAN;sp|P62807|H2B1C_HUMAN;sp|P58876|H2B1D_HUMAN;sp|P57053|H2BFS_HUMAN;sp|O60814|H2B1K_HUMAN	H2B1M_HUMAN	#N/A	#N/A	#N/A	0.223291	0.70129
sp|Q8N6T3|ARFG1_HUMAN	ARFG1_HUMAN	ARFGAP1	2.37802	1.54208	0.221397	0.667803
sp|Q13464|ROCK1_HUMAN	ROCK1_HUMAN	ROCK1	6.0151	2.45257	0.220865	0.693055
sp|O94906|PRP6_HUMAN	PRP6_HUMAN	PRPF6	5.99177	2.44781	0.218766	0.867666
sp|P40855|PEX19_HUMAN	PEX19_HUMAN	PEX19	5.04483	2.24607	0.21867	0.730974
sp|Q99755|PI51A_HUMAN	PI51A_HUMAN	PIP5K1A	4.83879	2.19972	0.217623	0.706719
sp|Q9BZI7|REN3B_HUMAN	REN3B_HUMAN	UPF3B	0	0	0.217554	-0.580711
sp|O14681|EI24_HUMAN	EI24_HUMAN	EI24	0	0	0.217462	0.373294
sp|Q96HE9|PRR11_HUMAN	PRR11_HUMAN	PRR11	0	0	0.214561	0.479938
sp|Q13523|PRP4B_HUMAN	PRP4B_HUMAN	PRPF4B	2.36171	1.53679	0.214352	-0.67891
sp|Q9NVU7|SDA1_HUMAN	SDA1_HUMAN	SDAD1	5.69994	2.38746	0.214145	1.01704
sp|P42766|RL35_HUMAN	RL35_HUMAN	RPL35	4.32121	2.07875	0.213545	0.268739
sp|Q16822|PCKGM_HUMAN	PCKGM_HUMAN	PCK2	6.80416	2.60848	0.212047	-0.322524
sp|Q9Y3U8|RL36_HUMAN	RL36_HUMAN	RPL36	2.70925	1.64598	0.211651	0.542892
sp|Q6FI81|CPIN1_HUMAN	CPIN1_HUMAN	CIAPIN1	0	0	0.210884	-0.539135
sp|P28288|ABCD3_HUMAN	ABCD3_HUMAN	ABCD3	10.6031	3.25624	0.210755	0.288029
sp|Q9H3S7|PTN23_HUMAN	PTN23_HUMAN	PTPN23	1.06352	1.03127	0.209525	-0.575976
sp|Q9UPP1|PHF8_HUMAN	PHF8_HUMAN	PHF8	4.15758	2.03902	0.209275	0.544776
sp|Q92878|RAD50_HUMAN	RAD50_HUMAN	RAD50	3.44537	1.85617	0.209075	0.789956
sp|Q9H7Z3|NRDE2_HUMAN	NRDE2_HUMAN	NRDE2	4.20125	2.0497	0.208733	-0.708514
sp|Q9NZJ7|MTCH1_HUMAN	MTCH1_HUMAN	MTCH1	88.9684	9.43231	0.208649	-0.272729
sp|P21333|FLNA_HUMAN	FLNA_HUMAN	FLNA	5.27452	2.29663	0.208352	0.597664
sp|P10809|CH60_HUMAN	CH60_HUMAN	HSPD1	3.64292	1.90864	0.208188	0.68587
sp|Q8WW12|PCNP_HUMAN	PCNP_HUMAN	PCNP	0	0	0.207976	0.532854
sp|P57088|TMM33_HUMAN	TMM33_HUMAN	TMEM33	0	0	0.207366	-0.442799
sp|P05023|AT1A1_HUMAN	AT1A1_HUMAN	ATP1A1	5.67821	2.3829	0.206576	0.667541
sp|Q8WWM7|ATX2L_HUMAN	ATX2L_HUMAN	ATXN2L	2.05665	1.4341	0.206522	0.675842
sp|P78371|TCPB_HUMAN	TCPB_HUMAN	CCT2	10.1108	3.17975	0.205458	0.753865
sp|Q99613|EIF3C_HUMAN;sp|B5ME19|EIFCL_HUMAN	EIF3C_HUMAN	EIF3C	0	0	0.204971	0.464328
sp|Q8NDH2|CC168_HUMAN	CC168_HUMAN	CCDC168	0	0	0.203937	0.49751
sp|P20340|RAB6A_HUMAN	RAB6A_HUMAN	RAB6A	22.0024	4.69067	0.203455	-0.878187
sp|P53007|TXTP_HUMAN	TXTP_HUMAN	SLC25A1	0	0	0.203041	0.639382
sp|Q53EU6|GPAT3_HUMAN	GPAT3_HUMAN	GPAT3	0	0	0.201523	0.539164
sp|Q14318|FKBP8_HUMAN	FKBP8_HUMAN	FKBP8	3.24355	1.80099	0.201464	0.451739
sp|Q5UIP0|RIF1_HUMAN	RIF1_HUMAN	RIF1	9.35018	3.05781	0.201299	0.435189
sp|Q2TBE0|C19L2_HUMAN	C19L2_HUMAN	CWF19L2	0	0	0.200817	0.318201
sp|O60716|CTND1_HUMAN	CTND1_HUMAN	CTNND1	8.8445	2.97397	0.198544	0.708809
sp|P16333|NCK1_HUMAN	NCK1_HUMAN	NCK1	1.15429	1.07438	0.198134	0.546642
sp|Q07812|BAX_HUMAN	BAX_HUMAN	BAX	2.74818	1.65776	0.197237	0.722796
sp|Q8TEV9|SMCR8_HUMAN	SMCR8_HUMAN	SMCR8	2.27907	1.50966	0.196393	-0.873698
sp|Q96A49|SYAP1_HUMAN	SYAP1_HUMAN	SYAP1	2.59964	1.61234	0.196099	0.547612
sp|Q13085|ACACA_HUMAN	ACACA_HUMAN	ACACA	21.4688	4.63344	0.195524	-0.339975
sp|Q5T6F2|UBAP2_HUMAN	UBAP2_HUMAN	UBAP2	1.45494	1.20621	0.193192	0.613354
sp|Q2NKX8|ERC6L_HUMAN	ERC6L_HUMAN	ERCC6L	4.40252	2.09822	0.192951	0.742271
sp|Q8NI27|THOC2_HUMAN	THOC2_HUMAN	THOC2	2.69872	1.64278	0.192898	-0.65971
sp|O94822|LTN1_HUMAN	LTN1_HUMAN	LTN1	0	0	0.191975	0.580324
sp|Q14C86|GAPD1_HUMAN	GAPD1_HUMAN	GAPVD1	11.8142	3.43718	0.191717	0.933334
sp|Q53GQ0|DHB12_HUMAN	DHB12_HUMAN	HSD17B12	0	0	0.189252	-0.273355
[truncated: 257 more rows]

## Sheet: NRas GD
Majority protein IDs	Uniprot	Gene NAME	WD score	Root WD score	Log Student's T-test p-value Ras GD	Student's T-test Difference Ras GD
[truncated: 1,022 more rows]

[truncated: 3 more sheets: NRas TN, RalB GV, Rheb QL]
