# Supplementary figures and images for: In vivo identification of GTPase interactors by mitochondrial relocalization and proximity biotinylation
Source: eLife journal article supplement (doi:10.7554/elife.45916), 2019-07-11

Figure 1 - figure supplement 1

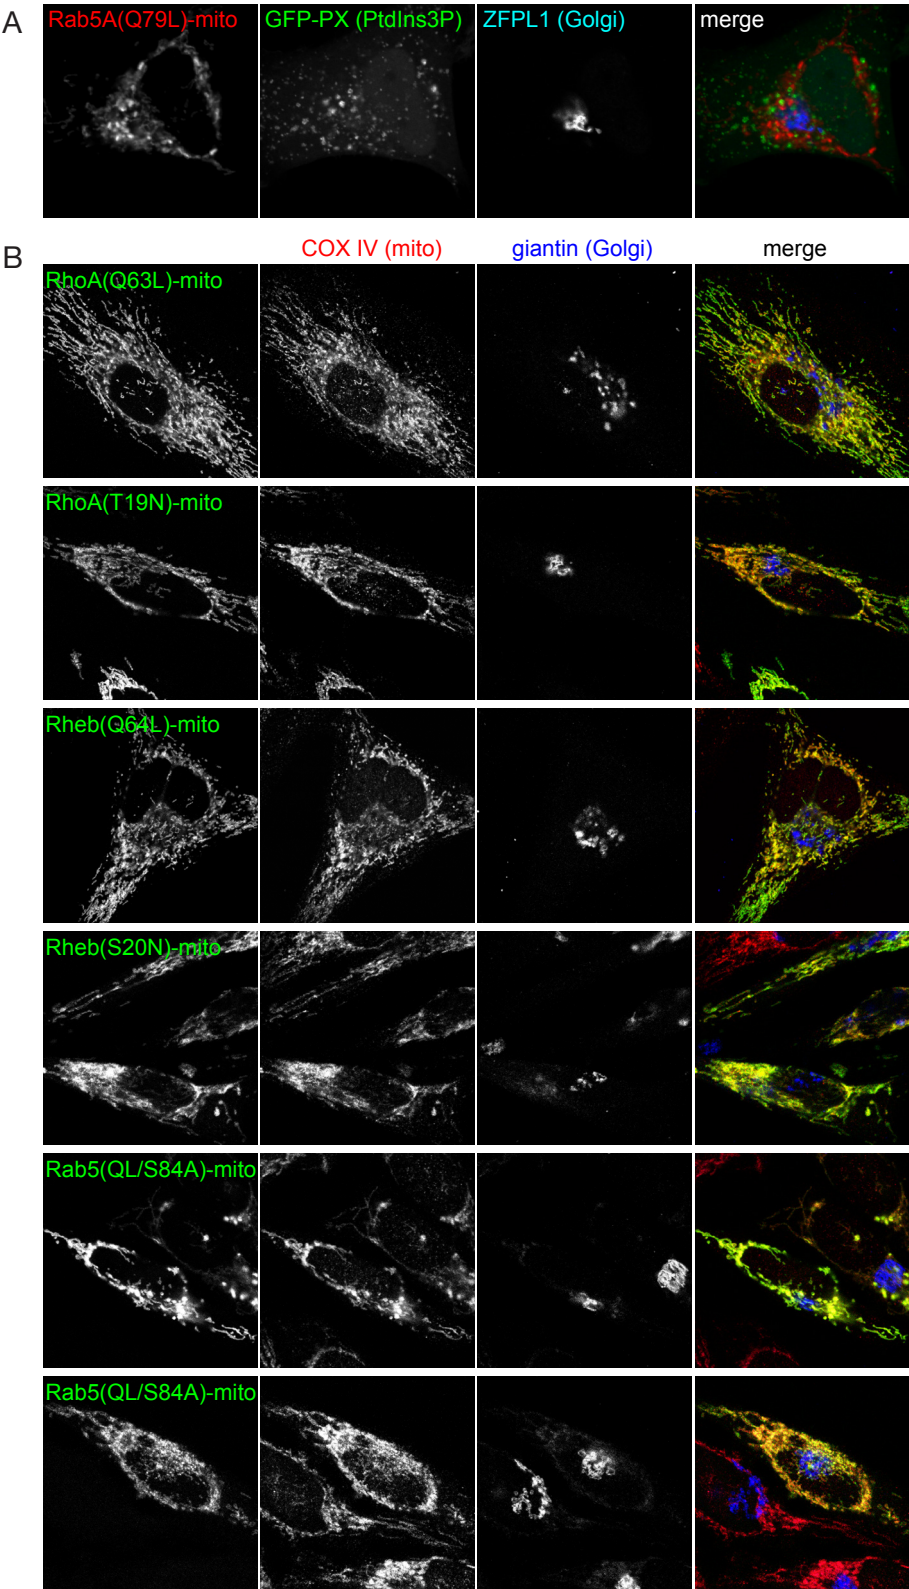

Supplement: supp [file elife_poa_e45916_Figure_1_figure_supplement_1.pdf › elife_poa_e45916_Figure_1_figure_supplement_1.pdf]

Figure 1 - figure supplement 2

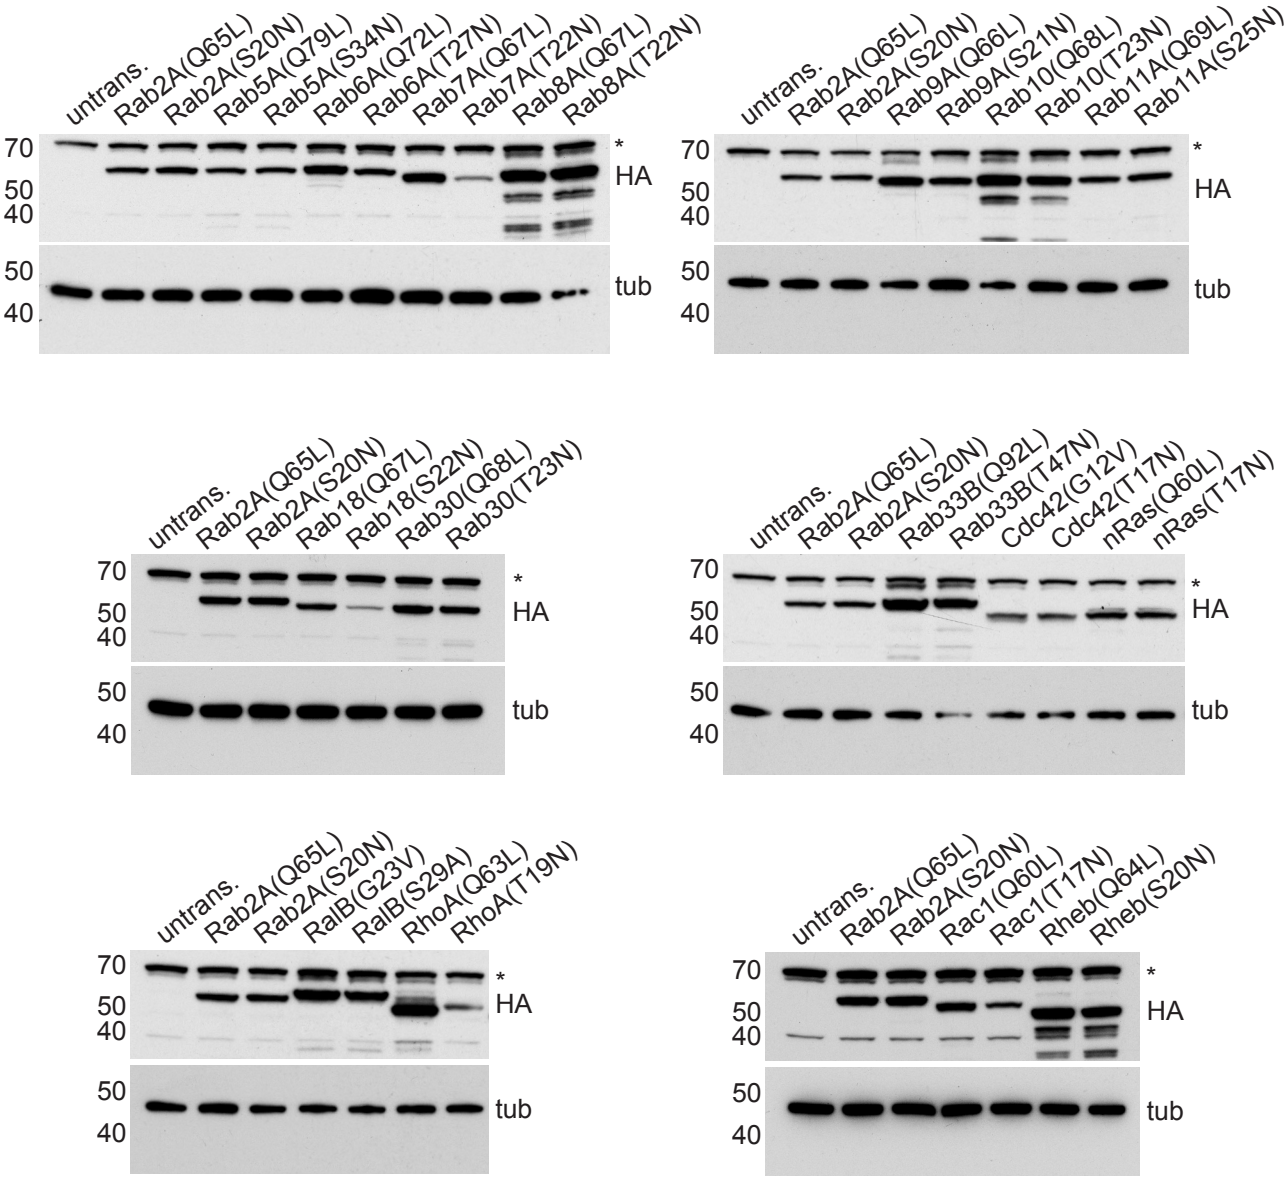

Supplement: supp [file elife_poa_e45916_Figure_1_figure_supplement_2.pdf › elife_poa_e45916_Figure_1_figure_supplement_2.pdf]

Figure 1 - figure supplement 3

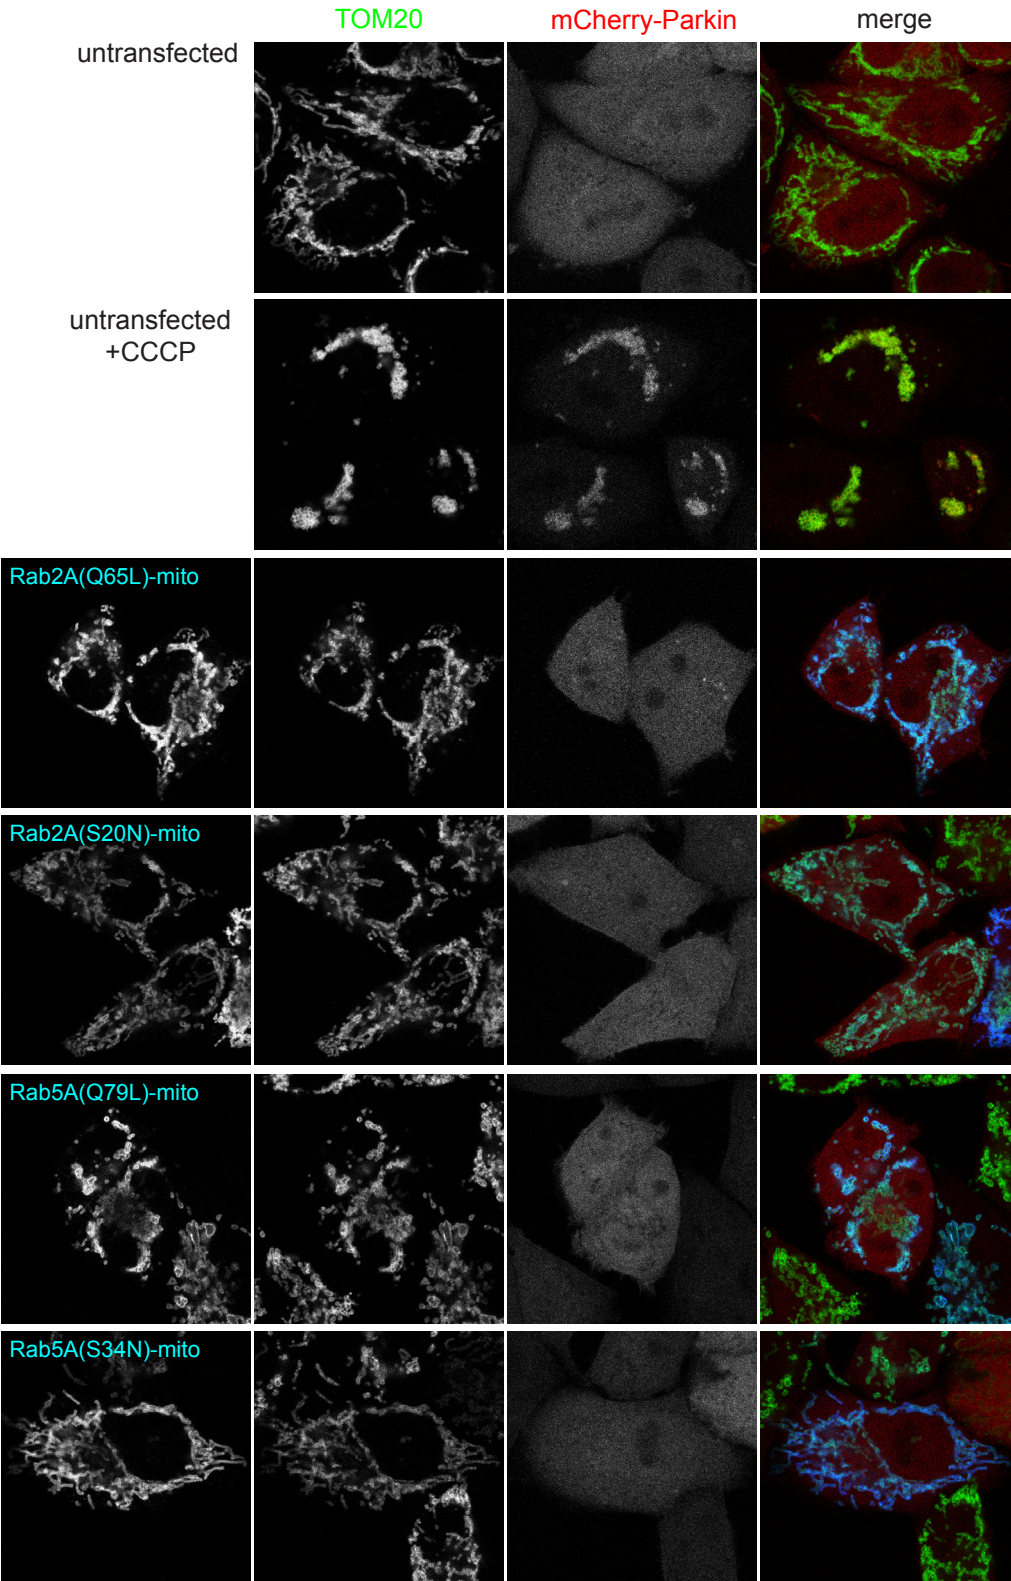

Supplement: supp [file elife_poa_e45916_Figure_1_figure_supplement_3.pdf › elife_poa_e45916_Figure_1_figure_supplement_3.pdf]

Figure 3 - figure supplement 1

A non-specific interactions

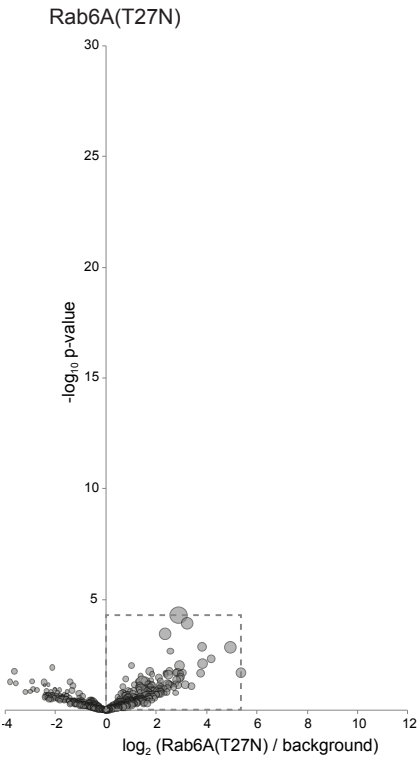

B known mammalian effectors

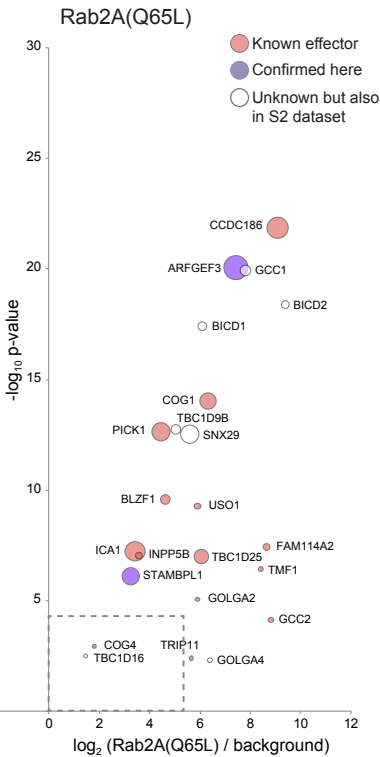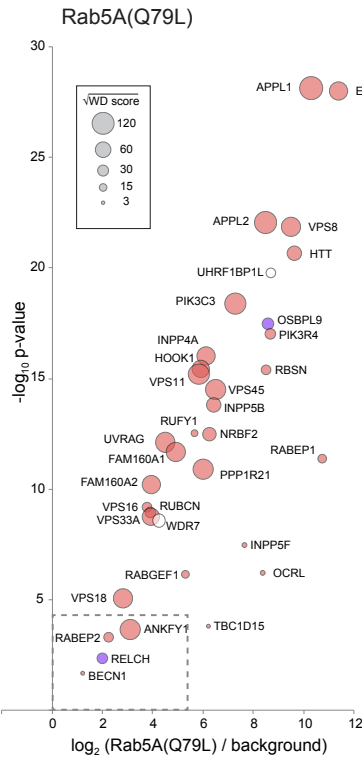

Supplement: supp [file elife_poa_e45916_Figure_3_figure_supplement_1.pdf › elife_poa_e45916_Figure_3_figure_supplement_1.pdf]

Figure 9 - figure supplement 1

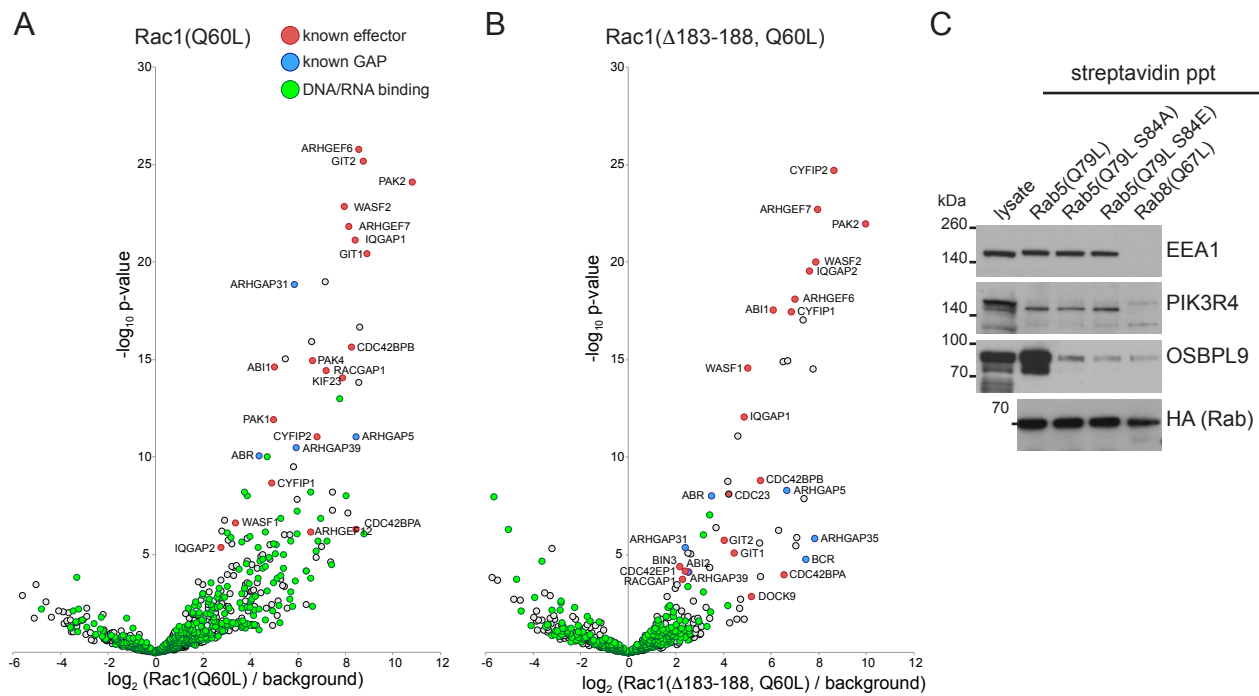

Supplement: supp [file elife_poa_e45916_Figure_9_figure_supplement_1.pdf › elife_poa_e45916_Figure_9_figure_supplement_1.pdf]
